# Supplementary material for: Cytosolic aggregation of mitochondrial proteins disrupts cellular homeostasis by stimulating the aggregation of other proteins
Source: bioRxiv preprint, doi:10.1101/2021.05.02.442342, version 2 (2021-07-09)
Supplement: Figure 2 - Source Data 1 [file 442342_file16.xlsx]

## Sheet: deseq.ripev.1h
	baseMean	log2FoldChange	lfcSE	stat	pvalue	padj
YAL008W	630.574	0.0967536	0.168815	0.573135	0.566553	0.99999
YBR255W	605.917	0.0693141	0.110784	0.625669	0.531532	0.99999
YGR164W	3.55616	0.70357	0.821486	0.856461	0.391743	NA
YGR131W	80.5499	0.109182	0.180305	0.605541	0.54482	NA
YNL003C	884.096	0.00515744	0.0919759	0.0560738	0.955283	0.99999
YBR135W	511.695	-0.0132	0.170567	-0.0773887	0.938314	0.99999
YBR160W	944.631	0.0341389	0.129646	0.263324	0.792301	0.99999
YJL082W	1103.97	0.11203	0.207606	0.539631	0.589452	0.99999
YJL142C	244.892	-0.0197828	0.372345	-0.0531303	0.957628	NA
YPL191C	233.247	-0.234988	0.202286	-1.16166	0.245374	NA
YGL215W	2471.83	-0.0395694	0.267556	-0.147892	0.882428	0.99999
YKL074C	821.129	-0.00347838	0.153351	-0.0226825	0.981904	0.99999
YJL077C	15.9347	-0.413675	0.597625	-0.692198	0.488813	NA
YKL096W-A	55082.8	0.0344187	0.140494	0.244983	0.80647	0.99999
YIL124W	1884.68	0.0567227	0.216546	0.261943	0.793365	0.99999
YPL039W	344.318	0.0759236	0.104166	0.72887	0.466081	0.99999
YNL170W	27.4162	-0.100027	0.526192	-0.190095	0.849234	NA
YGL141W	765.557	-0.00328999	0.144031	-0.0228422	0.981776	0.99999
YJL179W	289.083	0.0686601	0.103423	0.663879	0.506767	0.99999
YDR316W-B	604.687	0.0848251	1.43737	0.0590142	0.952941	0.99999
YKL083W	2.70555	0.159152	0.835165	0.190563	0.848868	NA
YBR152W	233.334	0.0783951	0.165509	0.47366	0.635742	NA
YKL029C	1141.88	0.125097	0.169796	0.736748	0.461276	0.99999
YPL166W	234.54	-0.111906	0.18761	-0.596482	0.550853	NA
YKL052C	526.567	0.0591864	0.138051	0.428729	0.668121	0.99999
YHR025W	3258.84	0.0874125	0.0921851	0.948228	0.343013	0.99999
YOL034W	544.337	-0.00941971	0.241692	-0.038974	0.968911	0.99999
YBL008W	466.9	-0.0115001	0.124798	-0.09215	0.926579	0.99999
YIL062C	2145.86	0.0832547	0.246431	0.337841	0.735483	0.99999
YOL116W	490.075	-0.0700162	0.12707	-0.551004	0.581631	0.99999
YDR196C	842.477	-0.030435	0.180618	-0.168505	0.866186	0.99999
YNL255C	3324.16	0.115852	0.102514	1.13012	0.258428	0.99999
YNR032W	755.09	-0.0111396	0.169924	-0.0655563	0.947731	0.99999
YNR045W	628.779	-0.0316923	0.161317	-0.19646	0.84425	0.99999
YML105C	1111.98	0.00677324	0.0816794	0.0829247	0.933911	0.99999
YNL288W	794.495	0.0518484	0.126254	0.410667	0.681317	0.99999
YIL059C	156.877	0.102874	0.205835	0.499789	0.617224	NA
YIL004C	417.043	0.191388	0.182727	1.0474	0.294915	0.99999
YNR018W	2751.49	0.0112642	0.189692	0.0593817	0.952648	0.99999
YPL144W	237.915	-0.00960709	0.186959	-0.0513859	0.959018	NA
YFR047C	1510.67	0.0918466	0.175765	0.522553	0.601286	0.99999
YER087C-B	1148.23	-0.0611947	0.13667	-0.447753	0.654331	0.99999
YHR078W	765.012	-0.0403259	0.140146	-0.287741	0.773545	0.99999
YIR023C-A	1.2973	-1.38632	1.2851	-1.07877	0.280692	NA
YJR115W	126.381	-0.216433	0.591711	-0.365774	0.714534	NA
YLR355C	8733.92	0.169399	0.247783	0.683659	0.494191	0.99999
YGR099W	460.805	0.122573	0.177753	0.689569	0.490466	0.99999
YLR300W	5952.38	0.0936545	0.121798	0.768936	0.441932	0.99999
YCL028W	2108.34	0.00574688	0.141267	0.0406809	0.96755	0.99999
YJR140C	567.512	0.0190127	0.257259	0.0739049	0.941086	0.99999
YOR033C	530.742	-0.0583368	0.10247	-0.569306	0.569148	0.99999
YOR062C	144.187	-0.133884	0.171114	-0.782426	0.433964	NA
YBR043C	1266.56	0.0450714	0.130572	0.345185	0.729955	0.99999
YHR112C	644.72	0.115476	0.265994	0.434131	0.664193	0.99999
YLR011W	218.613	-0.0480397	0.181115	-0.265244	0.790821	NA
YIL044C	867.238	-0.154851	0.0849404	-1.82306	0.068295	0.99999
YNL197C	1435.63	0.00685376	0.146514	0.0467789	0.962689	0.99999
YKR103W	211.458	-0.0746581	0.257613	-0.289807	0.771964	NA
YLR133W	1466.62	-0.0245065	0.091218	-0.268659	0.788192	0.99999
YER121W	63.8826	-0.206603	0.296644	-0.696469	0.486135	NA
YCR046C	652.005	0.258896	0.226614	1.14245	0.253266	0.99999
YNL144C	1461.37	-0.0379031	0.323782	-0.117063	0.90681	0.99999
YKL204W	1227.39	0.116925	0.0653691	1.78869	0.073665	0.99999
YOR266W	415.699	0.112691	0.120298	0.936771	0.348877	0.99999
YDR393W	378.214	0.0269315	0.116433	0.231305	0.817078	0.99999
YGL171W	609.087	0.0319003	0.333832	0.095558	0.923872	0.99999
YPR194C	2908.36	-0.137268	0.179261	-0.765741	0.44383	0.99999
YGR019W	1649.54	0.0323079	0.181542	0.177964	0.858751	0.99999
YBL033C	1370.33	0.0160618	0.219399	0.0732081	0.941641	0.99999
tE(UUC)G3	2.5828	1.04492	0.936353	1.11595	0.264445	NA
YJL188C	16.0843	-0.394085	0.497458	-0.792197	0.428246	NA
YLL057C	145.345	-0.0946941	0.189299	-0.500235	0.616909	NA
YPL060C-A	16.2025	-0.225088	0.383074	-0.587584	0.556812	NA
YBR296C	251.705	-0.137252	0.180844	-0.758952	0.447881	NA
YNL277W	106.503	0.0669008	0.250088	0.267509	0.789077	NA
YMR040W	401.815	-0.0316759	0.238637	-0.132737	0.894402	0.99999
YDR077W	41766.5	0.0539614	0.23654	0.228128	0.819547	0.99999
YMR266W	3830.55	-0.0800942	0.142256	-0.563027	0.573416	0.99999
YKR064W	612.711	0.079212	0.280393	0.282503	0.777558	0.99999
YPL089C	1198.73	0.050452	0.10979	0.45953	0.645854	0.99999
YGR277C	537.592	0.132018	0.148982	0.886135	0.375545	0.99999
YDL139C	127.28	0.169923	0.173257	0.980755	0.326714	NA
YDR246W	664.405	0.0888867	0.196936	0.451347	0.651739	0.99999
YOR288C	1299.68	-0.136067	0.283316	-0.480267	0.631038	0.99999
YCR028C	691.442	-0.0470609	0.16633	-0.282937	0.777225	0.99999
YML054C	632.904	-0.0850474	0.358205	-0.237427	0.812326	0.99999
YLR179C	2406.87	0.107458	0.124904	0.860324	0.38961	0.99999
YOR141C	1106.28	-0.0506328	0.132678	-0.381621	0.702743	0.99999
YPL280W	33.7538	-0.309672	0.239545	-1.29275	0.196097	NA
YBL106C	484.398	0.0604114	0.218104	0.276984	0.781792	0.99999
YGL044C	504.452	0.0809902	0.117215	0.690954	0.489595	0.99999
YER107C	760.554	0.0401801	0.138111	0.290926	0.771108	0.99999
YBR038W	1499.39	-0.0153909	0.152933	-0.100639	0.919837	0.99999
YER076W-A	5.29223	-0.111354	0.715821	-0.155561	0.876379	NA
YGR259C	15.6886	0.246678	0.413842	0.596069	0.551129	NA
YEL047C	1352.21	0.107944	0.156962	0.687707	0.491637	0.99999
YPR016C	2207.18	0.0302718	0.164807	0.18368	0.854264	0.99999
YOR208W	842.674	0.0244749	0.2705	0.0904802	0.927906	0.99999
YDL055C	26363.9	0.04965	0.0987465	0.502802	0.615103	0.99999
YML009C	428.5	0.165777	0.15921	1.04125	0.297761	0.99999
YML072C	3921.52	-0.00173419	0.120412	-0.0144022	0.988509	0.99999
YDR142C	527.818	-0.166133	0.100646	-1.65067	0.0988052	0.99999
YFL044C	817.53	0.32282	0.168644	1.91421	0.0555938	0.99999
RDN37-2	2.30391	4.5928	3.39936	1.35108	0.17667	NA
YEL011W	4711.95	-0.208277	0.643841	-0.323491	0.746323	0.99999
YKL019W	1346.61	0.00227607	0.164998	0.0137946	0.988994	0.99999
YJL130C	8149.84	0.181769	0.245283	0.741059	0.458658	0.99999
YBL085W	2050.49	0.0337513	0.0926624	0.36424	0.715679	0.99999
YBR116C	29.5653	-0.196596	0.269924	-0.728338	0.466407	NA
YDR166C	860.435	-0.0615642	0.276548	-0.222617	0.823834	0.99999
YDR082W	431.797	-0.0425745	0.145656	-0.292295	0.770061	0.99999
YDR348C	1605.39	-0.0943474	0.104445	-0.903321	0.366356	0.99999
YKL182W	15695.4	0.0508913	0.254315	0.200111	0.841393	0.99999
YKL018C-A	273.846	-0.066429	0.169715	-0.391414	0.695492	NA
YPL027W	8.365	0.367805	0.635463	0.578798	0.562725	NA
YKL135C	1461.43	-0.138396	0.149	-0.928835	0.352975	0.99999
YLR363C	224.929	0.150016	0.328308	0.456937	0.647716	NA
YEL077W-A	2.34006	1.76388	1.18192	1.49238	0.135598	NA
YDR179C	88.5926	0.105522	0.471759	0.223678	0.823008	NA
YML089C	13.48	-0.511377	0.515176	-0.992626	0.320892	NA
YLR431C	356.821	-0.0452677	0.138815	-0.326102	0.744347	0.99999
YKR046C	1254.73	0.0547572	0.249133	0.219791	0.826034	0.99999
YJR005W	1508.64	-0.0403709	0.164679	-0.245149	0.806341	0.99999
YJL116C	1124.53	0.275787	0.265596	1.03837	0.299098	0.99999
YMR030W	472.829	-0.0465164	0.101252	-0.459411	0.645939	0.99999
YER030W	1133.12	0.164198	0.241529	0.679829	0.496613	0.99999
YIR026C	737.729	0.0437516	0.107295	0.407771	0.683442	0.99999
YJR072C	1639.37	0.163335	0.119553	1.36621	0.171872	0.99999
YDR515W	380.855	0.126427	0.231738	0.54556	0.585369	0.99999
YKR039W	7728.17	0.0429637	0.21129	0.20334	0.838869	0.99999
YGL003C	828.308	0.0689514	0.0909966	0.757736	0.448609	0.99999
YPL009C	1645.05	0.00344061	0.182479	0.0188549	0.984957	0.99999
YDR268W	331.493	0.117628	0.107667	1.09252	0.274606	0.99999
YGL192W	4.9633	-0.2371	0.609857	-0.388781	0.697438	NA
YDL117W	698.847	-0.12584	0.170501	-0.73806	0.460478	0.99999
YMR131C	1983.26	0.0340501	0.17648	0.192941	0.847005	0.99999
YMR293C	327.549	-0.0571069	0.138006	-0.4138	0.679021	0.99999
YJL214W	14.3777	0.362169	0.366003	0.989525	0.322406	NA
YIL105C	1046.23	-0.0408735	0.153879	-0.265622	0.79053	0.99999
YML126C	3225.69	-0.0460854	0.11611	-0.396911	0.691433	0.99999
YLR189C	1088.3	-0.122959	0.195042	-0.630423	0.528418	0.99999
YIL150C	153.983	-0.172919	0.219212	-0.788819	0.430218	NA
YLR349W	50.7528	-0.439072	0.402603	-1.09058	0.275456	NA
YGL250W	311.463	0.0264857	0.21885	0.121022	0.903673	0.99999
YBR212W	2226.41	-0.0206295	0.121932	-0.169189	0.865648	0.99999
YJR109C	3344.5	0.113768	0.252499	0.45057	0.652299	0.99999
YLR254C	328.848	0.0348432	0.241855	0.144066	0.885448	0.99999
YGR085C	6269.58	0.0639002	0.148527	0.430225	0.667032	0.99999
YPL105C	2436.29	0.05817	0.124034	0.468985	0.639081	0.99999
YGR145W	1026.38	0.0242988	0.274867	0.0884019	0.929557	0.99999
YJR094C	119.381	-0.0305936	0.321382	-0.0951941	0.924161	NA
YKL177W	8.95295	-0.137494	0.521326	-0.263739	0.791981	NA
YGL154C	224.471	0.0532332	0.187305	0.284205	0.776253	NA
YBR129C	875.308	0.0589259	0.100978	0.58355	0.559523	0.99999
tK(UUU)D	5.69907	0.447255	0.612906	0.729727	0.465557	NA
YMR322C	1.91579	2.02859	1.32778	1.5278	0.126563	NA
YKL099C	481.566	0.178778	0.243908	0.732975	0.463574	0.99999
YDR315C	156.366	-0.00443736	0.237177	-0.0187091	0.985073	NA
YLR394W	456.283	-0.0502544	0.107073	-0.469347	0.638821	0.99999
YNL104C	4551.64	0.057315	0.134478	0.426203	0.66996	0.99999
YNL151C	638.625	0.104747	0.138945	0.753874	0.450925	0.99999
YNR066C	109.033	-0.0836771	0.261523	-0.31996	0.748998	NA
YLR220W	1103.46	-0.00356595	0.129603	-0.0275143	0.97805	0.99999
YHR006W	1186.12	0.0516943	0.14501	0.356488	0.721475	0.99999
YMR232W	72.2079	-0.433861	0.421127	-1.03024	0.302898	NA
YNL083W	583.904	-0.0458512	0.112819	-0.406414	0.684438	0.99999
YGR038C-B	1891.58	-0.220001	0.294249	-0.747672	0.454658	0.99999
YMR238W	2598.3	0.103126	0.0781528	1.31954	0.186989	0.99999
YER168C	781.9	-0.0747357	0.087432	-0.854787	0.392669	0.99999
YPL265W	1216.44	0.00877797	0.183345	0.0478768	0.961814	0.99999
YOR227W	1895.68	-0.0297878	0.164929	-0.180609	0.856674	0.99999
YOR081C	1178.92	-0.0589321	0.181732	-0.324279	0.745727	0.99999
YEL026W	2523.91	0.0855613	0.244181	0.350401	0.726038	0.99999
YGR050C	59.4574	0.00877195	0.389378	0.0225281	0.982027	NA
YDR021W	189.236	0.0430562	0.445531	0.0966402	0.923012	NA
YGL063W	321.381	0.0987077	0.149325	0.661024	0.508597	0.99999
YPL212C	1113.16	0.00502386	0.390329	0.0128708	0.989731	0.99999
YOL157C	136.444	0.29737	0.16682	1.78258	0.0746546	NA
YOR345C	2.74459	-1.20626	0.83518	-1.44431	0.148651	NA
YPR095C	937.238	-0.0196896	0.149857	-0.13139	0.895467	0.99999
YOR310C	3869.16	0.0967546	0.298396	0.324249	0.74575	0.99999
YDR188W	4628.99	0.145672	0.0978274	1.48908	0.136467	0.99999
YOL128C	174.828	-0.0240105	0.146574	-0.163811	0.86988	NA
YGL236C	468.76	0.198293	0.220216	0.900447	0.367882	0.99999
YHR133C	957.809	0.0405134	0.103109	0.392917	0.694381	0.99999
YDR017C	1267.14	0.0177257	0.186976	0.094802	0.924472	0.99999
YIL090W	914.021	0.0667822	0.219358	0.304444	0.76079	0.99999
YBR183W	279.496	-0.058112	0.418516	-0.138853	0.889567	0.99999
YOL048C	933.715	-0.0476303	0.235727	-0.202057	0.839872	0.99999
YML039W	16.7905	1.39233	2.81859	0.493981	0.62132	NA
YCR007C	712.261	0.061031	0.180067	0.338934	0.734659	0.99999
YDR540C	112.336	-0.402859	0.404047	-0.997059	0.318736	NA
YEL004W	247.802	-0.000937216	0.304021	-0.00308273	0.99754	NA
YPR057W	604.728	0.101024	0.0914054	1.10523	0.26906	0.99999
YLL032C	398.274	-0.0132983	0.28877	-0.0460514	0.963269	0.99999
YDR116C	748.139	0.203643	0.169434	1.2019	0.229401	0.99999
YPL119C-A	36.121	0.360322	0.74342	0.484682	0.627902	NA
YDR299W	558.081	0.0398759	0.664892	0.0599735	0.952177	0.99999
YLR030W	47.3323	-0.102528	0.227643	-0.450388	0.65243	NA
YDR122W	1949.68	0.0658031	0.097663	0.673777	0.500453	0.99999
YOL062C	1745.25	0.102663	0.126741	0.810023	0.417927	0.99999
YNL234W	244.466	-0.142902	0.143693	-0.994499	0.31998	NA
YLR467W	2183.03	-0.269366	0.180305	-1.49395	0.135189	0.99999
YJL194W	178.062	-0.111943	0.286955	-0.390107	0.696457	NA
YOL015W	265.988	0.0355933	0.274439	0.129695	0.896808	NA
YDL070W	5341.3	0.135406	0.150426	0.900151	0.36804	0.99999
YOR241W	902.182	0.00283113	0.129713	0.021826	0.982587	0.99999
YLR056W	5711.69	0.113564	0.23625	0.480696	0.630732	0.99999
YMR054W	2339.34	0.00105321	0.11272	0.00934359	0.992545	0.99999
YKL110C	658.233	0.0920375	0.128005	0.719017	0.47213	0.99999
YML100W-A	3.03309	-0.35927	0.896042	-0.400952	0.688455	NA
YPR070W	556.037	-0.0466988	0.302517	-0.154367	0.87732	0.99999
YLR204W	640.859	0.243631	0.164984	1.4767	0.139757	0.99999
YML097C	586.931	-0.0489246	0.127524	-0.383651	0.701237	0.99999
YKR007W	636.345	0.129209	0.179628	0.719316	0.471946	0.99999
YDL096C	3.46035	-0.502878	0.718593	-0.699809	0.484046	NA
YHR193C	8192.92	0.145387	0.149044	0.975464	0.32933	0.99999
YBL099W	12855.8	-0.25405	0.0998794	-2.54357	0.0109726	0.99999
YJR035W	452.754	-0.09163	0.115585	-0.792749	0.427924	0.99999
YOR126C	287.843	-0.0813954	0.147227	-0.552855	0.580363	0.99999
YMR023C	348.066	0.166421	0.0914297	1.82021	0.068727	0.99999
YOR119C	1214.31	-0.0104135	0.215712	-0.0482748	0.961497	0.99999
YNL196C	6.4652	-0.50943	0.756831	-0.673109	0.500878	NA
YNL187W	237.972	-0.0259965	0.159341	-0.16315	0.8704	NA
YMR141C	4.0215	-0.505533	0.79636	-0.634804	0.525556	NA
YLL014W	555.584	-0.0246485	0.174418	-0.141319	0.887618	0.99999
YCR061W	278.156	-0.0345167	0.316739	-0.108975	0.913222	NA
YOR199W	1.89923	0.00275259	1.11576	0.00246701	0.998032	NA
YPR115W	1984.28	-0.0825202	0.0777565	-1.06126	0.28857	0.99999
YHR088W	755.81	0.0710759	0.25024	0.284031	0.776386	0.99999
YBR017C	1138.12	-0.0481452	0.138394	-0.347884	0.727927	0.99999
YPR162C	391.62	-0.0867772	0.126184	-0.687705	0.491638	0.99999
YGR166W	575.568	-0.0806828	0.290723	-0.277525	0.781377	0.99999
YDL161W	1623.91	0.0306999	0.1484	0.206872	0.83611	0.99999
YKL050C	248.475	0.0732436	0.15439	0.474405	0.635211	NA
YJR055W	86.5031	0.0921431	0.329392	0.279737	0.779679	NA
YGL099W	1131.05	0.0472625	0.244575	0.193243	0.846769	0.99999
YFL030W	1026.73	-0.508576	0.202756	-2.50831	0.012131	0.99999
YIL119C	309.142	-0.0677244	0.428292	-0.158127	0.874357	0.99999
YPL193W	544.923	-0.0495691	0.230017	-0.215502	0.829376	0.99999
YNL005C	1381.85	0.10604	0.07065	1.50092	0.133376	0.99999
YJL144W	754.231	0.29529	0.732542	0.403104	0.686872	0.99999
YBR012W-B	386.344	0.112472	0.239328	0.469948	0.638392	0.99999
YLR379W	2.62414	-0.252536	0.797474	-0.31667	0.751494	NA
YJR139C	4536.55	-0.0549726	0.0973648	-0.564604	0.572343	0.99999
YBR133C	1092.74	-0.0199434	0.125462	-0.158959	0.873701	0.99999
YBR162C	20567.5	0.0537746	0.116871	0.460119	0.645431	0.99999
YNL331C	245.376	-0.0181075	0.141741	-0.127751	0.898346	NA
YJL079C	7070.75	0.20205	0.0860792	2.34726	0.0189121	0.99999
YGL019W	1249.75	0.0954836	0.174897	0.545941	0.585107	0.99999
YGR201C	383.656	-0.0660913	0.220708	-0.299452	0.764596	0.99999
YNL172W	647.986	-0.0514333	0.224468	-0.229134	0.818765	0.99999
YNL058C	476.306	-0.0134553	0.347566	-0.0387129	0.969119	0.99999
YPL160W	3574.05	0.0306027	0.216995	0.14103	0.887846	0.99999
YNL023C	783.805	0.162583	0.193159	0.841709	0.399951	0.99999
YDR214W	3920.67	0.296145	0.809971	0.365624	0.714646	0.99999
YLR222C	1149.25	-0.051096	0.597429	-0.0855264	0.931843	0.99999
YLR295C	1965.75	-0.266329	0.166117	-1.60326	0.108876	0.99999
YER175W-A	3.36001	-0.643403	1.33348	-0.482499	0.629451	NA
YHR168W	327.828	0.0525494	0.126502	0.415404	0.677846	0.99999
YOR064C	386.256	0.0151676	0.16822	0.0901655	0.928156	0.99999
YOR159C	361.984	0.0945959	0.161388	0.586139	0.557782	0.99999
YOL081W	1571.98	0.0327571	0.361116	0.0907107	0.927722	0.99999
YOL036W	1773.28	0.0701535	0.0831764	0.843431	0.398987	0.99999
YGL148W	3990.36	0.0599419	0.0704904	0.850355	0.395128	0.99999
YOR031W	321.336	-0.109568	0.435023	-0.251867	0.801144	0.99999
YBR282W	449.664	0.154694	0.152609	1.01366	0.310747	0.99999
YDR194C	2032.43	0.0881891	0.258995	0.340505	0.733476	0.99999
YOL114C	87.6994	-0.224851	0.208767	-1.07704	0.281462	NA
YGR084C	699.128	0.168597	0.128341	1.31367	0.188958	0.99999
YNR030W	1101.38	-0.15212	0.159265	-0.955136	0.339509	0.99999
YAL037C-A	2.08314	0.763359	0.969139	0.787667	0.430891	NA
YML007C-A	7.59104	-0.716916	0.522366	-1.37244	0.169926	NA
YBR018C	69022.1	0.0914249	0.217851	0.419667	0.674729	0.99999
YKL076C	116.843	0.139162	0.240251	0.579234	0.562431	NA
YDR466W	864.803	0.0360914	0.12755	0.282959	0.777208	0.99999
YFR045W	421.839	-0.0861951	0.192475	-0.447824	0.654281	0.99999
YIL002C	741.629	-0.109059	0.163322	-0.667757	0.504289	0.99999
YGR159C	5866.78	0.091774	0.647295	0.141781	0.887253	0.99999
YLR369W	766.564	-0.0791232	0.0928491	-0.852169	0.39412	0.99999
YFR032C	17.7753	-0.0852579	0.52223	-0.163257	0.870316	NA
YNL118C	1925.66	-0.0391276	0.121623	-0.321712	0.747671	0.99999
YGL228W	2484.69	0.00326777	0.0931356	0.0350861	0.972011	0.99999
YJR117W	2728.17	0.077684	0.110988	0.699932	0.48397	0.99999
YBR196C-A	13.4518	0.268618	0.56295	0.477161	0.633248	NA
YBR196C-B	12.0719	-0.0891881	0.446535	-0.199734	0.841689	NA
YIL030W-A	51.8349	0.00278811	0.226137	0.0123293	0.990163	NA
YLR357W	1226.62	0.0143062	0.126235	0.113329	0.90977	0.99999
YER127W	368.868	0.148371	0.414835	0.357663	0.720595	0.99999
YBL015W	1619.1	-0.342574	0.16861	-2.03176	0.0421783	0.99999
YLR017W	959.1	0.0987944	0.0943161	1.04748	0.294878	0.99999
YHR110W	979.11	0.0224198	0.155845	0.14386	0.885611	0.99999
YBR041W	1451.81	-0.0850251	0.117172	-0.725645	0.468056	0.99999
YOR394W	19.6306	-0.277808	0.445108	-0.624136	0.532538	NA
YDL220C	333.484	-0.00818905	0.106828	-0.0766564	0.938897	0.99999
YDL039C	753.033	-0.188803	0.39499	-0.477995	0.632654	0.99999
YKL202W	14.2927	-0.0942774	0.452734	-0.20824	0.835042	NA
YGR122C-A	13.1666	-0.201352	0.669662	-0.300678	0.76366	NA
YOR264W	737.439	-0.0951968	0.0860455	-1.10635	0.268574	0.99999
YNL042W-B	2.1993	-0.366338	0.991115	-0.369622	0.711664	NA
YBL029C-A	550.416	-0.173344	0.556921	-0.311255	0.755607	0.99999
YOR008W-B	16.7122	-0.171065	0.364606	-0.469179	0.638942	NA
YOR366W	26.7785	-0.164165	0.344793	-0.476127	0.633984	NA
YNL275W	373.893	7.9892e-06	0.245659	3.25215e-05	0.999974	0.99999
YAR015W	4396.67	-0.0952015	0.154357	-0.616762	0.537392	0.99999
YOR384W	120.792	0.324502	0.237248	1.36778	0.171382	NA
YLL051C	1211.46	0.0688527	0.131775	0.522501	0.601321	0.99999
YDR427W	1918.36	0.058378	0.341841	0.170775	0.8644	0.99999
YLR079W	1602.68	0.042333	0.196476	0.215461	0.829408	0.99999
YLR408C	100.681	-0.0475241	0.189018	-0.251427	0.801484	NA
YMR093W	636.436	0.10262	0.539297	0.190285	0.849086	0.99999
YDR079W	275.766	0.0311863	0.121905	0.255825	0.798086	NA
YMR268C	223.082	-0.135192	0.250972	-0.538675	0.590111	NA
YML070W	2654.89	-0.061775	0.142251	-0.434267	0.664095	0.99999
YHR175W-A	108.794	0.0132982	0.588111	0.0226118	0.98196	NA
YPR072W	1663.95	-0.0657042	0.126879	-0.517851	0.604563	0.99999
YMR108W	4893.58	0.164731	0.0776718	2.12086	0.0339332	0.99999
YCR091W	601.296	-0.0931005	0.42303	-0.22008	0.825809	0.99999
YER062C	876.864	0.0547306	0.178369	0.306839	0.758966	0.99999
YDR244W	745.324	0.00979272	0.0875226	0.111888	0.910912	0.99999
YER189W	81.216	-0.023075	0.33889	-0.06809	0.945714	NA
YDL137W	6114.76	0.0284794	0.15175	0.187673	0.851133	0.99999
YGR271W	915.159	-0.0975898	0.252325	-0.386761	0.698933	0.99999
YDR233C	6621.84	-0.0208615	0.077043	-0.270778	0.786562	0.99999
YGR071C	512.481	-0.0498722	0.390416	-0.127741	0.898354	0.99999
YCR106W	304.616	-0.104629	0.305668	-0.342297	0.732127	0.99999
YBL100C	2.23743	-1.44658	1.13685	-1.27245	0.203214	NA
YER109C	750.868	-0.0665853	0.136213	-0.488832	0.624961	0.99999
YDR489W	238.157	0.0635695	0.120741	0.526495	0.598544	NA
YPR049C	523.47	-0.0592011	0.217336	-0.272395	0.785319	0.99999
YDL057W	250.97	-0.110163	0.225243	-0.489082	0.624783	NA
YGR257C	846.02	0.145728	0.108907	1.33809	0.180866	0.99999
YEL045C	11.9599	-0.512553	0.443847	-1.1548	0.248173	NA
YPL235W	1754.38	-0.0151405	0.131232	-0.115372	0.90815	0.99999
YLR122C	31.045	0.113969	0.320173	0.355962	0.721869	NA
YLR155C	7627.14	0.0404337	0.231887	0.174368	0.861576	0.99999
YBL087C	4184.04	0.0596962	0.166829	0.357828	0.720472	0.99999
YJL132W	324.603	-0.0609241	0.270604	-0.225141	0.821869	0.99999
YGL190C	978.712	0.0121473	0.188913	0.0643007	0.948731	0.99999
YBR110W	1135.64	-0.036104	0.135353	-0.266739	0.78967	0.99999
YDR144C	747.415	-0.0503916	0.171672	-0.293535	0.769113	0.99999
YFL046W	604.451	-0.0336893	0.145222	-0.231985	0.81655	0.99999
YOR103C	552.248	-0.105156	0.356999	-0.294555	0.768333	0.99999
YKL137W	446.302	0.154485	0.21751	0.71024	0.477555	0.99999
YDR447C	4444.24	0.0521742	0.195043	0.267501	0.789084	0.99999
YGL009C	3406.89	-0.094206	0.0832121	-1.13212	0.257585	0.99999
YPR145W	6994.14	0.0643351	0.220309	0.292023	0.770269	0.99999
YJL063C	1061.82	0.22344	0.184134	1.21346	0.224954	0.99999
YMR149W	2568.11	-0.0285	0.148263	-0.192226	0.847565	0.99999
YIR010W	665.033	0.0750734	0.167382	0.448517	0.65378	0.99999
YDR331W	664.486	-0.0244891	0.0751153	-0.326021	0.744409	0.99999
YJL114W	5.47023	-0.470849	1.31646	-0.357662	0.720596	NA
YKR044W	392.454	0.0127257	0.179035	0.0710791	0.943335	0.99999
YLR433C	769.754	-0.143484	0.0969307	-1.48028	0.1388	0.99999
YMR068W	180.683	-0.0645102	0.320504	-0.201278	0.840482	NA
YLR157C-B	30.3253	0.660675	3.11756	0.211921	0.832169	NA
YNL164C	269.795	0.05363	0.253372	0.211665	0.832368	NA
YER032W	611.086	-0.0601399	0.110263	-0.54542	0.585465	0.99999
YJR070C	2127.21	0.130091	0.132501	0.981815	0.326191	0.99999
YGL005C	727.507	-0.0572576	0.113061	-0.506429	0.612556	0.99999
YHR043C	2468.66	-0.077415	0.180572	-0.428721	0.668126	0.99999
YDL111C	714.863	-0.0535362	0.0837898	-0.638934	0.522866	0.99999
YMR133W	4.86076	-0.226482	0.804552	-0.281501	0.778326	NA
YPL007C	453.567	-0.0685271	0.136201	-0.503134	0.61487	0.99999
YKL159C	732.206	0.0505405	0.116092	0.43535	0.663309	0.99999
YDR507C	1820.19	-0.119143	0.293316	-0.406194	0.6846	0.99999
YLR138W	2263.13	0.0683498	0.077612	0.88066	0.378502	0.99999
YBR101C	2758.83	0.436895	0.554204	0.788329	0.430504	0.99999
YLR396C	480.7	-0.0354938	0.183592	-0.19333	0.846701	0.99999
YBR245C	1306.81	-0.0265725	0.172647	-0.153912	0.877679	0.99999
YJL216C	123.099	-0.125672	0.204534	-0.614431	0.538931	NA
YBR210W	391.399	-0.171387	0.104015	-1.64772	0.0994107	0.99999
YPL103C	533.306	-0.0291311	0.1225	-0.237805	0.812032	0.99999
YIL103W	407.202	0.0818478	0.307898	0.265827	0.790372	0.99999
YIL152W	413.448	0.075002	0.211823	0.354079	0.723279	0.99999
YJR096W	783.404	-0.0227882	0.262197	-0.0869125	0.930741	0.99999
YAL010C	394.536	0.0111546	0.143939	0.0774953	0.93823	0.99999
YGR143W	1575.21	-0.0520368	0.0819099	-0.635293	0.525237	0.99999
YGR112W	523.088	0.0678433	0.256027	0.264985	0.791021	0.99999
YLR256W	4498.92	0.0153331	0.30346	0.0505274	0.959702	0.99999
YHR174W	68659.2	0.322335	0.216778	1.48694	0.137031	0.99999
YOR012W	41.1411	0.205601	0.250874	0.819538	0.41248	NA
YIR001C	651.085	-0.149457	0.0842904	-1.77312	0.0762082	0.99999
YDL213C	1095.72	0.0494091	0.12956	0.38136	0.702936	0.99999
YDR317W	45.889	-0.0784921	0.413035	-0.190038	0.84928	NA
YDR478W	127.593	0.0755584	0.144191	0.524016	0.600267	NA
YKL097C	2.70319	0.438545	1.25592	0.349182	0.726953	NA
YNL106C	505.581	-0.0783762	0.116082	-0.675181	0.49956	0.99999
YOR378W	10.922	-0.175037	0.42931	-0.407716	0.683482	NA
YFR015C	4976.19	0.00388271	0.820116	0.00473434	0.996223	0.99999
YMR230W	4221.42	-0.0128326	0.139095	-0.0922579	0.926493	0.99999
YIL092W	268.263	0.0466552	0.193745	0.240808	0.809704	NA
YAR009C	12052.2	-0.0852127	0.284063	-0.299978	0.764194	0.99999
YLR321C	709.684	-0.00185407	0.087923	-0.0210875	0.983176	0.99999
YBR004C	954.194	-0.00653557	0.573701	-0.0113919	0.990911	0.99999
YGR052W	256.534	-0.23791	0.809999	-0.293717	0.768974	NA
YJR161C	531.733	-0.0199991	0.130393	-0.153375	0.878102	0.99999
YOR278W	367.917	0.0776544	0.115172	0.674247	0.500154	0.99999
YNL085W	2021.92	-0.00291631	0.326911	-0.00892081	0.992882	0.99999
YGL061C	247.521	-0.00162227	0.203261	-0.00798122	0.993632	NA
YPL210C	1651.52	0.0416614	0.216515	0.192418	0.847415	0.99999
tS(AGA)G	1.19701	-0.0680393	1.16245	-0.0585308	0.953326	NA
YOR087W	1070.42	0.0367541	0.0929203	0.395545	0.692441	0.99999
YGL234W	7049.24	-0.0718275	0.120761	-0.594789	0.551985	0.99999
YOR347C	956.739	-0.0987115	0.530425	-0.186099	0.852367	0.99999
YPR093C	249.143	0.0243044	0.208574	0.116526	0.907235	NA
YAL029C	1571.51	-0.0409113	0.279047	-0.146611	0.883439	0.99999
YOL155C	402.113	-0.149203	0.232797	-0.640917	0.521577	0.99999
YDR421W	567.081	-0.0665123	0.102129	-0.651258	0.51488	0.99999
YGR186W	2275.27	0.0414342	0.0485989	0.852575	0.393895	0.99999
YDR294C	1783.64	-0.00952593	0.14005	-0.0680179	0.945771	0.99999
YHR135C	2600.35	0.0611493	0.0952526	0.64197	0.520893	0.99999
YBR181C	9381.22	0.0839795	0.130937	0.641374	0.52128	0.99999
YOR078W	544.169	0.0689545	0.244827	0.281645	0.778215	0.99999
YOR243C	1676.57	0.0596767	0.294017	0.20297	0.839158	0.99999
YMR165C	899.118	0.0631678	0.0843041	0.749285	0.453686	0.99999
YCR005C	2922.59	-0.125816	0.111024	-1.13323	0.257118	0.99999
YPR055W	575.364	-0.046593	0.328024	-0.142041	0.887047	0.99999
YIL016W	629.888	0.165555	0.131985	1.25435	0.209716	0.99999
YLR032W	401.679	-0.0722262	0.208236	-0.346847	0.728706	0.99999
YDR114C	2.06067	1.43588	1.11615	1.28646	0.198284	NA
YPR046W	152.681	0.0462544	0.172374	0.268338	0.78844	NA
YBR099C	54.8783	0.49965	0.490453	1.01875	0.308321	NA
YBL027W	12908	0.11878	0.136401	0.87081	0.383858	0.99999
YOL060C	1804.15	0.0554079	0.242567	0.228423	0.819317	0.99999
YOR382W	1104.27	0.570703	0.206503	2.76365	0.00571587	0.965166
YNL232W	672.621	-0.0652148	0.137805	-0.473238	0.636043	0.99999
YDL076C	580.472	-0.0137325	0.0801558	-0.171323	0.86397	0.99999
YDR120C	1104.09	0.090181	0.225127	0.400579	0.68873	0.99999
YLR465C	41.9998	-0.288267	0.272706	-1.05706	0.290484	NA
YJL192C	1293.59	-0.043975	0.0662091	-0.664184	0.506573	0.99999
YLR054C	298.498	0.0419026	0.204272	0.205132	0.837469	0.99999
YLR009W	1308.58	0.110894	0.27399	0.404736	0.685672	0.99999
YKL116C	795.168	0.0235012	0.123629	0.190094	0.849235	0.99999
YOR292C	381.369	-0.189898	0.283244	-0.67044	0.502578	0.99999
YLR423C	344.978	-0.1667	0.152247	-1.09493	0.273547	0.99999
YLR105C	682.593	-0.0721907	0.148895	-0.484844	0.627787	0.99999
YML091C	1522.52	-0.41509	0.277873	-1.49381	0.135225	0.99999
YHR191C	160.063	0.225603	0.183506	1.22941	0.218919	NA
YDL098C	220.392	0.0377403	0.127263	0.296553	0.766808	NA
YLR202C	50.392	0.0254576	0.241625	0.10536	0.91609	NA
YKR005C	128.64	0.179202	0.159592	1.12288	0.26149	NA
YMR143W	6461.13	0.0398844	0.168339	0.23693	0.812711	0.99999
YCR063W	67.3432	-0.127059	0.243165	-0.522521	0.601308	NA
YNL189W	3117.77	-0.00430246	0.0698241	-0.0616186	0.950867	0.99999
YFR024C-A	2164.67	0.128466	0.162681	0.78968	0.429715	0.99999
YCL047C	302.486	-0.0692357	0.199429	-0.347169	0.728464	0.99999
YGL122C	2062.72	0.0724835	0.124859	0.580521	0.561563	0.99999
YDL018C	326.035	0.0057664	0.246426	0.0234001	0.981331	0.99999
YOR120W	13901.7	0.110461	0.220713	0.500474	0.616741	0.99999
YPR160W	3291	-0.216581	0.563976	-0.384024	0.70096	0.99999
YBL060W	408.427	-0.108908	0.186692	-0.583357	0.559653	0.99999
YDR065W	203.236	-0.107179	0.289711	-0.36995	0.71142	NA
YBR019C	117007	0.182795	0.150041	1.2183	0.223112	0.99999
YKL056C	13973.1	0.113046	0.184258	0.613522	0.539531	0.99999
YKL065W-A	19.0768	-0.0491241	0.337528	-0.145541	0.884284	NA
YGR160W	4.11589	-1.05399	0.779363	-1.35238	0.176254	NA
YPL068C	269.762	0.144368	0.26729	0.540118	0.589115	NA
YJR057W	453.314	0.105443	0.123918	0.850909	0.39482	0.99999
YGL211W	754.481	0.00810511	0.11171	0.0725551	0.94216	0.99999
YFL032W	16.1772	0.265308	0.355802	0.745664	0.45587	NA
YPL195W	1290.39	-0.0854503	0.215255	-0.396972	0.691388	0.99999
YCL044C	968.115	-0.042569	0.251818	-0.169047	0.86576	0.99999
YAL059W	345.569	0.160709	0.251147	0.639899	0.522238	0.99999
YNL007C	8045.26	0.430324	0.411442	1.04589	0.29561	0.99999
YPL148C	137.03	0.186509	0.143072	1.3036	0.192371	NA
YJR137C	915.671	-0.0812402	0.150425	-0.540073	0.589147	0.99999
YMR021C	481.558	0.0661342	0.0936374	0.706279	0.480014	0.99999
YMR074C	845.008	-0.047126	0.142851	-0.329897	0.741478	0.99999
YGR203W	207.333	0.138321	0.20384	0.678574	0.497408	NA
YJR039W	469.875	-0.111683	0.144297	-0.773979	0.438943	0.99999
YDL158C	45.4212	0.244045	0.750692	0.325093	0.74511	NA
YOR104W	372.828	-0.0223718	0.125475	-0.178297	0.858489	0.99999
YFL009W	1193.88	-0.0670081	0.0727051	-0.921642	0.356715	0.99999
YLR297W	78.2493	0.04047	0.395387	0.102355	0.918475	NA
YDR216W	3763.24	-0.0741278	0.248708	-0.298051	0.765664	0.99999
YIL120W	302.77	-0.0261215	0.159962	-0.163298	0.870284	0.99999
YBR030W	665.866	-0.00500046	0.23657	-0.0211373	0.983136	0.99999
YPL162C	376.36	-0.030461	0.136407	-0.22331	0.823294	0.99999
YGR095C	482.928	0.124656	0.162139	0.76882	0.442	0.99999
YCL027W	273.155	-0.487666	0.321096	-1.51875	0.128825	NA
snR5	11.4987	-0.2768	0.406137	-0.681544	0.495527	NA
snR4	31.4684	0.0318524	0.345265	0.0922549	0.926495	NA
snR9	18.8824	-0.0643477	0.392517	-0.163936	0.869782	NA
snR8	9.63053	-0.192393	0.678369	-0.283612	0.776708	NA
YHR029C	613.815	0.176	0.103528	1.70003	0.089125	0.99999
YAL033W	370.049	0.0842266	0.232323	0.362541	0.716948	0.99999
YNL130C	1826.36	-0.0462141	0.0748835	-0.617147	0.537138	0.99999
YNR036C	1400.19	0.108524	0.253358	0.428345	0.6684	0.99999
YNR049C	529.657	0.0542788	0.151155	0.359093	0.719526	0.99999
YDR192C	385.876	-0.0607803	0.172706	-0.35193	0.724891	0.99999
YOL112W	967.029	0.00410233	0.128135	0.0320157	0.97446	0.99999
YML109W	440.322	0.0684176	0.150428	0.45482	0.649239	0.99999
YOL083W	470.445	-0.138299	0.151772	-0.911227	0.362176	0.99999
YNL251C	1707.51	-0.0642869	0.294263	-0.218468	0.827065	0.99999
YBL004W	1256.71	-7.43613e-05	0.535661	-0.000138821	0.999889	0.99999
YER145C-A	2.64286	-0.226704	0.936498	-0.242076	0.808721	NA
YBR164C	978.229	-0.00489663	0.0999589	-0.0489864	0.96093	0.99999
YHR074W	2167.84	-0.0151894	0.0608267	-0.249716	0.802807	0.99999
YDR464W	918.951	0.0156632	0.202353	0.0774052	0.938301	0.99999
YFR030W	1208.42	0.0209875	0.0861392	0.243646	0.807505	0.99999
YJL146W	511.986	0.0284047	0.080061	0.354788	0.722749	0.99999
YKL078W	254.566	0.105646	0.68294	0.154693	0.877063	NA
YIL055C	540.653	0.0933935	0.158556	0.589024	0.555845	0.99999
YPL053C	1544.57	-0.00739046	0.0770135	-0.0959631	0.92355	0.99999
YLR351C	1763.19	-0.00213174	0.142214	-0.0149897	0.98804	0.99999
YEL009C-A	5.49393	0.188553	0.662212	0.284732	0.77585	NA
YJR111C	324.751	0.0352757	0.197489	0.178621	0.858235	0.99999
YIL030C	1950.41	-0.0544624	0.289526	-0.188109	0.850791	0.99999
YER125W	2706.99	0.00261641	0.125736	0.0208088	0.983398	0.99999
YER152C	1526.21	0.0170387	0.148295	0.114897	0.908527	0.99999
YLR015W	363.264	0.0776391	0.13421	0.578489	0.562934	0.99999
YHR116W	207.687	0.352983	0.208602	1.69214	0.09062	NA
YPL259C	1245.45	-0.0341171	0.168515	-0.202457	0.83956	0.99999
YOL100W	1028.19	-0.0599854	0.121531	-0.49358	0.621602	0.99999
YOR039W	1025.78	-0.0565515	0.0798273	-0.708424	0.478682	0.99999
YDL037C	266.332	-0.413873	0.657345	-0.629614	0.528947	NA
YHL043W	1.21618	-2.07248	1.4263	-1.45305	0.146211	NA
YOR364W	11.1315	-0.0562297	0.414506	-0.135655	0.892094	NA
YOR386W	430.701	-0.0129782	0.266587	-0.0486826	0.961172	0.99999
YAR042W	1382.36	-0.0294497	0.134703	-0.218628	0.82694	0.99999
YPR198W	1503.71	-0.052912	0.221632	-0.238739	0.811308	0.99999
YHL038C	368.734	0.0655763	0.099358	0.66	0.509254	0.99999
YLL053C	62.9395	-0.216798	0.414674	-0.522817	0.601102	NA
YDR425W	539.886	-0.0615623	0.19582	-0.314382	0.753231	0.99999
YOR331C	5.4681	-0.314298	0.745646	-0.421511	0.673382	NA
YML076C	615.886	0.0213934	0.164814	0.129803	0.896722	0.99999
YKR060W	270.169	-0.0776964	0.261288	-0.297359	0.766193	NA
YHR094C	5.43603	-0.0749822	0.63906	-0.117332	0.906597	NA
YER069W	815.189	-0.184275	0.130295	-1.41429	0.157276	0.99999
YMR091C	1219.37	-0.0248896	0.0567227	-0.438795	0.66081	0.99999
YER012W	2632.03	0.0341118	0.134732	0.253182	0.800127	0.99999
YHR098C	2736.71	-0.0872578	0.180059	-0.484607	0.627955	0.99999
YDL135C	1202.56	-0.031975	0.0705136	-0.453458	0.650219	0.99999
YCR093W	1726.57	-0.00333708	0.321679	-0.0103739	0.991723	0.99999
YGL080W	617.531	-0.200394	0.133986	-1.49564	0.134748	0.99999
YBR069C	2589.08	-0.0505418	0.329548	-0.153367	0.878109	0.99999
YGR077C	742.53	-0.0784165	0.13542	-0.579063	0.562547	0.99999
YCR104W	6.58146	0.0785272	0.584324	0.13439	0.893094	NA
YDR040C	3591.1	0.0930627	0.120502	0.772289	0.439943	0.99999
YPR012W	18.2214	-0.196203	0.367471	-0.533928	0.593391	NA
YGR255C	1402.01	-0.0239472	0.149194	-0.160511	0.872478	0.99999
YDL051W	1781.43	-0.0260684	0.139568	-0.18678	0.851833	0.99999
YBL102W	820.264	-0.0227981	0.200554	-0.113676	0.909495	0.99999
tM(CAU)P	3.07659	-1.69418	0.824137	-2.0557	0.0398113	NA
YPL237W	3883.37	0.0395362	0.0759638	0.520461	0.602742	0.99999
YLR120C	5536.69	-0.0178733	0.136027	-0.131395	0.895463	0.99999
YCL001W-B	6.63875	-0.516848	0.60177	-0.858879	0.390407	NA
YCL001W-A	4.76014	-0.172372	0.63022	-0.273511	0.78446	NA
YNL068C	454.081	0.0268445	0.102964	0.260719	0.794309	0.99999
YBL002W	5756.51	0.132131	0.11632	1.13593	0.255986	0.99999
YDR146C	1077.13	0.0929721	0.236653	0.392862	0.694421	0.99999
YBR112C	2125.87	0.0853745	0.116607	0.732157	0.464073	0.99999
YBL081W	487.446	-0.0621355	0.353379	-0.175833	0.860425	0.99999
YFL040W	8.21785	-0.0361817	0.495638	-0.0730003	0.941806	NA
YNL326C	443.299	-0.135681	0.115622	-1.17349	0.240598	0.99999
YDR337W	716.993	0.122982	0.0924052	1.3309	0.183222	0.99999
YJL061W	815.199	-0.153136	0.245414	-0.623988	0.532635	0.99999
YPR147C	807.863	0.0363369	0.0864212	0.420462	0.674148	0.99999
YKL131W	2.52743	-0.977829	0.904598	-1.08095	0.279717	NA
YDR441C	456.407	0.173232	0.127344	1.36035	0.17372	0.99999
YPL094C	2859.43	-0.00808417	0.154041	-0.0524807	0.958146	0.99999
YOR101W	1417.54	0.19062	0.216579	0.880141	0.378783	0.99999
YER020W	2254.2	0.125482	0.244189	0.513871	0.607342	0.99999
YDR231C	546.334	-0.0385192	0.299687	-0.128532	0.897728	0.99999
YJL112W	967.41	0.00056484	0.0762565	0.0074071	0.99409	0.99999
YFL066C	427.038	-0.265221	0.167189	-1.58635	0.11266	0.99999
YNL193W	690.624	-0.047182	0.104344	-0.452176	0.651143	0.99999
YML058W	2205.66	-0.0216185	0.265459	-0.0814382	0.935093	0.99999
YBR188C	298.503	-0.0667023	0.121678	-0.548188	0.583563	0.99999
YLR435W	421.834	0.107797	0.254926	0.422855	0.672401	0.99999
YJR076C	1861.55	0.0664806	0.100779	0.659666	0.509468	0.99999
YKL157W	4395.05	-0.0239393	0.0718833	-0.33303	0.739112	0.99999
YBR003W	1071.49	-0.0247829	0.171295	-0.144679	0.884964	0.99999
YPR129W	1791.14	0.0563154	0.067956	0.828705	0.407272	0.99999
YDL113C	1134.63	0.00237793	0.0941647	0.0252528	0.979853	0.99999
YMR135C	1401.9	-0.0272599	0.165293	-0.164919	0.869008	0.99999
YGL007W	3.38896	-0.35228	1.02137	-0.344909	0.730163	NA
YPL005W	311.245	-0.0746755	0.100232	-0.745025	0.456257	0.99999
YBR247C	681.021	0.142769	0.322687	0.442438	0.658172	0.99999
YLR185W	4161.24	0.0496783	0.16901	0.293937	0.768806	0.99999
YJL210W	717.445	0.0760233	0.250342	0.303678	0.761373	0.99999
YLR398C	1222.07	-0.0164834	0.188451	-0.0874676	0.9303	0.99999
YIL154C	1230.26	0.0551212	0.227397	0.2424	0.80847	0.99999
YIL101C	1630.18	-0.000805522	0.234303	-0.00343795	0.997257	0.99999
YKL004W	1313.47	0.0848629	0.169129	0.501766	0.615832	0.99999
YPL154C	10813	0.0199629	0.197214	0.101225	0.919372	0.99999
YPL101W	960.525	0.0195213	0.0842272	0.231769	0.816717	0.99999
YLR258W	3844.18	-0.174092	0.630234	-0.276234	0.782368	0.99999
YBR178W	2.13062	0.929267	1.06353	0.873759	0.38225	NA
YJR098C	237.276	-0.0787111	0.124905	-0.630168	0.528584	NA
YHR176W	264.184	0.0800263	0.132123	0.605694	0.544718	NA
YJR018W	7.43255	-0.394764	0.49687	-0.794503	0.426903	NA
YMR326C	1.20836	1.14072	1.25532	0.908712	0.363502	NA
YDL244W	50.9387	-0.489809	0.294624	-1.66249	0.0964145	NA
YDR319C	619.972	-0.0840113	0.222169	-0.378141	0.705326	0.99999
YKL095W	421.708	0.0134339	0.13329	0.100788	0.919719	0.99999
YOL099C	5.67071	-1.1088	0.855188	-1.29656	0.194783	NA
YIL094C	2496.17	0.160907	0.117272	1.37208	0.170037	0.99999
YLR451W	893.797	0.0286167	0.167529	0.170816	0.864368	0.99999
YFR017C	1167.24	-0.181242	0.720801	-0.251445	0.80147	0.99999
YLR342W-A	11.9897	0.216573	0.895052	0.241967	0.808806	NA
YIL076W	2066.04	-0.168419	0.0848595	-1.98468	0.0471797	0.99999
YNR077C	2.35536	-0.606838	1.01825	-0.595964	0.551199	NA
YOL044W	371.832	-0.12979	0.16375	-0.792608	0.428006	0.99999
YLR323C	210.341	-0.0480763	0.146435	-0.328311	0.742677	NA
YOR085W	1847.06	0.0168566	0.102661	0.164197	0.869576	0.99999
YGR054W	2287.68	0.0592612	0.179337	0.330447	0.741062	0.99999
YOR050C	3.70656	1.35542	0.789901	1.71594	0.0861727	NA
YNL087W	2594.63	-0.0323144	0.1676	-0.192807	0.84711	0.99999
YLR318W	209.552	-0.132275	0.401643	-0.329336	0.741902	NA
YBR278W	322.51	0.130094	0.217779	0.597368	0.550262	0.99999
YNL024C-A	405.334	0.0749646	0.0989462	0.75763	0.448673	0.99999
YDR296W	968.242	0.157814	0.192951	0.817895	0.413417	0.99999
YGL232W	757.663	-0.0678053	0.17033	-0.398082	0.69057	0.99999
YPR091C	1607.38	-0.0464168	0.0923519	-0.502608	0.61524	0.99999
YGR141W	674.564	-0.105688	0.226169	-0.467298	0.640287	0.99999
YAR030C	13.2531	-0.00282678	0.426775	-0.00662357	0.994715	NA
YGL111W	1012.31	0.0724823	0.161982	0.44747	0.654536	0.99999
YHR137W	1240.95	-0.169129	0.14392	-1.17516	0.239929	0.99999
YFL011W	45.5573	0.459067	0.291299	1.57593	0.115042	NA
YMR198W	376.934	0.105492	0.154911	0.680981	0.495884	0.99999
YCR003W	457.578	0.160323	0.187944	0.853034	0.393641	0.99999
YMR316C-B	77.4577	-0.0020634	0.178733	-0.0115446	0.990789	NA
YMR316C-A	5.34592	0.221964	0.560601	0.39594	0.692149	NA
YDR342C	17657.3	0.101701	0.311374	0.326618	0.743957	0.99999
YMR163C	444.062	-0.00222505	0.187785	-0.0118489	0.990546	0.99999
YGR294W	22.156	-0.145685	0.301332	-0.483469	0.628763	NA
YEL008W	3.49916	-0.516377	0.705338	-0.732099	0.464108	NA
YLL067C	58.558	1.11835	1.20803	0.925765	0.354568	NA
YBR020W	129435	0.105495	0.12564	0.839661	0.401098	0.99999
YLR418C	890.659	-0.0180723	0.0863031	-0.209405	0.834132	0.99999
YER059W	793.717	0.0308346	0.201808	0.152792	0.878563	0.99999
YNL076W	876	0.0395172	0.0712727	0.554451	0.579271	0.99999
YBL025W	160.477	0.027574	0.145193	0.189913	0.849377	NA
YOL066C	605.888	0.000961977	0.0995109	0.00966706	0.992287	0.99999
YDR126W	215.635	-0.0576971	0.143021	-0.403416	0.686642	NA
YPL216W	332.539	0.109077	0.192916	0.565411	0.571794	0.99999
YOR223W	353.914	-0.0160943	0.245247	-0.0656248	0.947677	0.99999
YEL022W	1044.35	-0.0187795	0.368091	-0.0510187	0.959311	0.99999
YHR072W	1877.15	-0.0660472	0.0894348	-0.738496	0.460213	0.99999
YOL019W	2690.58	-0.0813876	0.205382	-0.396275	0.691902	0.99999
YLR463C	117.073	-0.240112	0.235957	-1.01761	0.308865	NA
YJL190C	5893.15	0.073929	0.188936	0.391292	0.695581	0.99999
YMR218C	645.113	-0.0774483	0.257096	-0.301243	0.763229	0.99999
YNL265C	947.08	-0.0678281	0.131031	-0.517651	0.604702	0.99999
YNL230C	297.202	0.0585931	0.182573	0.32093	0.748263	0.99999
YLL049W	246.667	-0.246455	0.129128	-1.9086	0.0563133	NA
YHR211W	649.344	0.0175424	0.13246	0.132436	0.89464	0.99999
YPR166C	495.739	0.190568	0.10083	1.89	0.0587584	0.99999
YJL042W	2030.35	-0.0445238	0.142808	-0.311773	0.755213	0.99999
YNL301C	1320.91	-0.111782	0.152164	-0.734616	0.462573	0.99999
YDR333C	1116.91	-0.0623352	0.180349	-0.345636	0.729617	0.99999
YMR058W	16725.9	0.0694028	0.16587	0.418416	0.675643	0.99999
YDR061W	754.264	0.020393	0.105925	0.192524	0.847332	0.99999
YJR112W-A	395.985	0.117981	0.248038	0.475658	0.634318	0.99999
YOR290C	1911.83	0.011656	0.167492	0.0695911	0.944519	0.99999
YKL114C	1053.71	-0.0218538	0.0704354	-0.310268	0.756357	0.99999
YML024W	9281.54	0.0474766	0.148205	0.320344	0.748707	0.99999
YML093W	1416.81	0.0597364	0.337476	0.17701	0.859501	0.99999
YHR197W	596.992	-0.0257447	0.595414	-0.0432383	0.965512	0.99999
YDR276C	1823.48	-0.0278942	0.245165	-0.113777	0.909414	0.99999
YLR200W	485.373	0.0637574	0.101231	0.629821	0.528812	0.99999
YKR003W	885.476	-0.0501247	0.151003	-0.331944	0.739932	0.99999
YLR107W	961.818	-0.0276282	0.106443	-0.259558	0.795205	0.99999
YMR321C	15.4784	-1.12273	2.98034	-0.376712	0.706387	NA
YER175C	724.691	-0.0765465	0.12337	-0.620463	0.534953	0.99999
YIR012W	1234.6	0.168441	0.187397	0.898845	0.368735	0.99999
YDL183C	167.858	-0.088968	0.177325	-0.501723	0.615862	NA
YPL278C	172.005	0.100376	0.15967	0.62865	0.529578	NA
YMR118C	8.46618	-1.11922	0.565006	-1.9809	0.0476021	NA
YCL049C	1056.11	0.0794853	0.155458	0.511297	0.609143	0.99999
YBL066C	823.042	-0.232113	0.114431	-2.0284	0.0425191	0.99999
YGL120C	2202.71	0.0581087	0.227501	0.255422	0.798397	0.99999
YGR271C-A	301.327	0.0844716	0.424021	0.199216	0.842094	0.99999
YDR169C	1363.19	-0.00327911	0.0990498	-0.0331056	0.97359	0.99999
YOR057W	659.434	-0.106737	0.0987677	-1.08069	0.279835	0.99999
YLR410W-A	101.472	-4.13736	3.02707	-1.36679	0.171692	NA
YMR272C	2509.12	-0.00166628	0.142235	-0.0117149	0.990653	0.99999
YPR108W	2295.45	0.112888	0.0713845	1.58141	0.113784	0.99999
YKL054C	3413.78	0.12559	0.117897	1.06525	0.286761	0.99999
YGR162W	3645.36	-0.0237439	0.302512	-0.0784891	0.937439	0.99999
YDL165W	612.629	0.00650884	0.187208	0.034768	0.972265	0.99999
YDR520C	418.807	0.0393068	0.297571	0.132092	0.894911	0.99999
YKL023W	502.475	0.0612864	0.158698	0.386181	0.699362	0.99999
YJR051W	1122.59	0.0165743	0.112322	0.14756	0.88269	0.99999
YNL009W	284.81	0.0106	0.10009	0.105905	0.915658	0.99999
YFL034W	865.179	0.0488053	0.0986675	0.494644	0.620851	0.99999
YKL164C	7019.88	0.037284	0.17731	0.210276	0.833452	0.99999
YJR135C	144.174	-0.130405	0.123059	-1.0597	0.289282	NA
YGL213C	813.838	-0.0391001	0.109063	-0.358511	0.719961	0.99999
YMR076C	552.538	0.053447	0.296074	0.180519	0.856745	0.99999
YOR161W-B	18.1316	0.0246358	0.410585	0.0600018	0.952154	NA
YNL027W	1333.78	0.161633	0.135381	1.19392	0.232509	0.99999
YLR291C	837.783	-0.0301919	0.137468	-0.219629	0.82616	0.99999
YDR210W	456.393	-0.0819628	0.279834	-0.292898	0.7696	0.99999
YIL122W	435.444	0.060792	0.126196	0.481728	0.629999	0.99999
YDL230W	420.786	0.0279598	0.284647	0.0982262	0.921753	0.99999
YJR113C	1032.42	0.104375	0.193216	0.5402	0.589059	0.99999
YGL075C	145.752	0.083481	0.159462	0.523518	0.600614	NA
YHR041C	552.878	0.128668	0.18494	0.695729	0.486598	0.99999
YIL156W-B	498.175	-0.0281228	0.302472	-0.0929766	0.925922	0.99999
YIL156W-A	1.9514	0.817459	1.0713	0.763055	0.44543	NA
YLR416C	4.90225	-0.529423	0.592039	-0.894237	0.371195	NA
YGR097W	1676.04	0.0233032	0.161805	0.14402	0.885484	0.99999
YIL068C	899.382	-0.064511	0.132217	-0.487918	0.625608	0.99999
YCL025C	10135	0.114912	0.175873	0.653379	0.513512	0.99999
YNR034W	503.593	0.0338109	0.264316	0.127918	0.898214	0.99999
YOL085C	1.79462	0.10983	1.00572	0.109205	0.91304	NA
YNL282W	188.541	0.135762	0.189063	0.71808	0.472708	NA
YBR286W	10786.2	-0.00544205	0.193426	-0.0281351	0.977554	0.99999
YGL144C	481.451	0.0686254	0.210863	0.32545	0.744841	0.99999
YDR190C	2313.97	0.0719343	0.0691878	1.0397	0.298481	0.99999
YAL031C	728.358	-0.109815	0.132758	-0.827178	0.408136	0.99999
YBL006C	916.846	0.261695	0.239995	1.09042	0.275528	0.99999
YNL132W	1329.56	0.057412	0.547876	0.10479	0.916542	0.99999
YBR264C	345.952	0.00973237	0.179842	0.0541161	0.956843	0.99999
YBR231C	388.327	0.156211	0.187216	0.83439	0.404061	0.99999
YLR162W-A	9.43133	-0.186199	0.571527	-0.325792	0.744581	NA
YPL197C	1.85283	0.0411365	1.01373	0.0405792	0.967631	NA
YHR076W	1014.52	0.0814076	0.200555	0.405911	0.684808	0.99999
YDR462W	450.343	0.213915	0.183449	1.16607	0.243585	0.99999
YJL148W	873.98	0.0157345	0.299047	0.0526154	0.958038	0.99999
YIL057C	246.753	0.5506	0.335417	1.64154	0.100685	NA
YPL055C	572.595	0.0486152	0.173663	0.27994	0.779523	0.99999
YLR353W	938.6	-0.0125323	0.0897289	-0.139669	0.888922	0.99999
YIL020C	187.495	0.0407717	0.131479	0.3101	0.756485	NA
YIL148W	8960.94	0.0404177	0.151293	0.267148	0.789355	0.99999
YNR016C	13063.5	0.0633279	0.20985	0.301777	0.762822	0.99999
YFR036W	124.826	0.0932343	0.152668	0.610698	0.541399	NA
YHR114W	931.16	0.0473566	0.114697	0.412885	0.679691	0.99999
YGR028W	1373.08	-0.0678417	0.108542	-0.625029	0.531952	0.99999
YER150W	898.761	-0.339665	0.737329	-0.46067	0.645036	0.99999
YNL279W	116.545	-0.263253	0.204797	-1.28543	0.198642	NA
YDR400W	794.806	-0.168887	0.162657	-1.0383	0.299129	0.99999
YDL068W	2.56433	-1.34377	0.930984	-1.44339	0.148912	NA
YOL027C	1965.47	0.0393225	0.123862	0.317471	0.750886	0.99999
YPL257W	100.138	0.0417688	0.208694	0.200144	0.841368	NA
YPL120W	266.251	-0.148064	0.213875	-0.692294	0.488752	NA
YOL145C	2035.47	0.0270955	0.216778	0.124992	0.90053	0.99999
YJL099W	557.194	0.0266175	0.08714	0.305457	0.760018	0.99999
YHR149C	759.81	-0.0118328	0.272377	-0.0434428	0.965349	0.99999
YDR395W	1561.01	-0.0424103	0.279553	-0.151708	0.879418	0.99999
YOL110W	461.432	0.0509024	0.229474	0.221822	0.824453	0.99999
YDR005C	1140.37	-0.11191	0.097767	-1.14466	0.25235	0.99999
YMR311C	1947.37	0.0345933	0.215905	0.160224	0.872704	0.99999
YBL039C	1595.36	0.0337953	0.331778	0.101861	0.918867	0.99999
YGR188C	210.015	0.0546861	0.176246	0.310283	0.756346	NA
YOR362C	3155.73	0.165271	0.171221	0.965246	0.334422	0.99999
YPR106W	348.347	0.0525865	0.139689	0.376456	0.706578	0.99999
YLR126C	848.398	-0.00193541	0.112187	-0.0172517	0.986236	0.99999
YDL053C	885.4	0.0537734	0.0844269	0.636923	0.524175	0.99999
YML074C	4594.93	0.0092227	0.166792	0.0552947	0.955904	0.99999
YKR062W	777.167	-0.0222402	0.0846684	-0.262674	0.792802	0.99999
YBR235W	1099.7	-0.00133574	0.105738	-0.0126325	0.989921	0.99999
YER010C	617.617	0.116689	0.129795	0.899022	0.368641	0.99999
YML003W	111.082	0.00716399	0.33374	0.0214658	0.982874	NA
YMR097C	661.592	-0.133877	0.133186	-1.00519	0.314806	0.99999
YDL133W	706.861	0.0214966	0.0829421	0.259176	0.795499	0.99999
YNL330C	1349.37	0.119184	0.0933912	1.27618	0.201891	0.99999
YGR228W	4.79106	-0.433718	0.639591	-0.678118	0.497697	NA
YHR096C	442.639	-0.211207	0.375474	-0.562507	0.57377	0.99999
YBR008C	535.81	-0.0422588	0.114375	-0.369474	0.711774	0.99999
YDL035C	1090.68	0.00383742	0.126239	0.0303982	0.975749	0.99999
YMR253C	418.772	0.0996571	0.150798	0.660865	0.508699	0.99999
YCR102C	179.05	0.297005	0.16403	1.81068	0.0701907	NA
YJL127C-B	333.269	-0.141349	0.130788	-1.08075	0.279808	0.99999
YOR257W	818.513	0.147916	0.128912	1.14742	0.251207	0.99999
YGR002C	568.073	0.066738	0.0864076	0.772363	0.4399	0.99999
YEL041W	275.592	0.126794	0.294407	0.430676	0.666704	NA
YGR075C	141.415	-0.0071612	0.224515	-0.0318963	0.974555	NA
YGR253C	2855.49	0.146506	0.140812	1.04044	0.298138	0.99999
YDR510W	2225.46	0.0700139	0.190206	0.368094	0.712803	0.99999
YPL050C	1932.33	-0.0121611	0.0780404	-0.155831	0.876166	0.99999
YMR166C	260.745	0.0931164	0.233966	0.397992	0.690636	NA
YPR045C	675.074	-0.125354	0.171651	-0.730285	0.465216	0.99999
YPL231W	19428.2	0.0335142	0.176554	0.189824	0.849447	0.99999
YLR148W	647.366	-0.0461909	0.290261	-0.159136	0.873562	0.99999
YMR137C	332.109	-0.161289	0.149047	-1.08214	0.279191	0.99999
YDL082W	4937.18	0.0857587	0.145433	0.589679	0.555406	0.99999
YKL155C	659.054	0.0822548	0.17207	0.478031	0.632628	0.99999
YBR162W-A	1202.44	0.0566975	0.231621	0.244785	0.806623	0.99999
YFL042C	1124.5	0.0976537	0.160489	0.608475	0.542873	0.99999
YBL083C	198.471	0.122648	0.177031	0.692803	0.488433	NA
YDR148C	4359.59	-0.261299	0.129329	-2.02042	0.0433394	0.99999
YHR052W-A	319.465	-0.309195	0.438755	-0.704709	0.480992	0.99999
YPL096W	567.201	-0.0488613	0.146811	-0.332818	0.739271	0.99999
YDR335W	1990.82	-0.00654612	0.169213	-0.0386857	0.969141	0.99999
YPR141C	340.972	0.0750421	0.205594	0.365001	0.715111	0.99999
YMR039C	1818.16	-0.0514896	0.112654	-0.457057	0.64763	0.99999
YIL058W	2.2424	0.864708	0.921466	0.938404	0.348037	NA
YNL320W	523.918	0.0075058	0.0815201	0.092073	0.92664	0.99999
YPL078C	5129.96	-0.338942	0.115568	-2.93283	0.00335884	0.721844
YCR095C	381.354	0.0375568	0.171859	0.218532	0.827014	0.99999
YLL011W	586.718	0.00956584	0.42618	0.0224455	0.982093	0.99999
YCR077C	2693.37	0.0605436	0.160113	0.37813	0.705334	0.99999
YLR437C	266.686	0.0916495	0.197837	0.463258	0.64318	NA
YFL064C	82.4521	-0.299644	0.993153	-0.30171	0.762873	NA
YNL191W	194.471	-0.0726574	0.179444	-0.404903	0.685549	NA
YDR237W	783.682	0.0927965	0.113457	0.817903	0.413412	0.99999
YJL110C	655.09	0.102696	0.154739	0.663672	0.5069	0.99999
YKR048C	3539.25	0.0663041	0.155892	0.425322	0.670602	0.99999
YBR001C	962.119	3.75888e-06	0.292225	1.28629e-05	0.99999	0.99999
YPL003W	534.553	-0.171522	0.322672	-0.531567	0.595026	0.99999
YKL108W	291.55	0.205626	0.155361	1.32353	0.185658	0.99999
YGR110W	556.39	-0.127879	0.244682	-0.522633	0.60123	0.99999
YJR074W	985.567	0.106913	0.168223	0.635544	0.525074	0.99999
YPR127W	875.651	0.0520791	0.112776	0.461791	0.644231	0.99999
YIR028W	50.8378	-0.766619	0.273356	-2.80447	0.00503995	NA
YAL012W	4330.32	0.0657644	0.105861	0.62123	0.534448	0.99999
YMR288W	514.09	0.0425657	0.205581	0.207051	0.83597	0.99999
YIL156W	677.901	-0.0220565	0.134876	-0.163532	0.8701	0.99999
YBR241C	873.929	-0.0279317	0.319813	-0.0873376	0.930403	0.99999
YHR063W-A	2.37912	-1.60635	1.12044	-1.43369	0.151662	NA
YJL212C	101.828	0.0457596	0.155669	0.293954	0.768793	NA
YPL156C	679.473	0.00346444	0.190478	0.0181881	0.985489	0.99999
YNL312W	1040.91	0.0698943	0.152227	0.459145	0.64613	0.99999
YLR187W	669.849	0.116809	0.180699	0.646427	0.518003	0.99999
YDR099W	5980.57	0.0363219	0.0617168	0.588525	0.55618	0.99999
YKL133C	412.894	-0.222815	0.157414	-1.41547	0.156931	0.99999
YLR400W	1.6359	1.0452	1.12751	0.926998	0.353927	NA
YHR170W	2304.21	0.0493527	0.219133	0.225218	0.82181	0.99999
YDR259C	98.9787	0.115988	0.184448	0.628837	0.529456	NA
YKL068W	1279.36	0.012941	0.233547	0.0554107	0.955811	0.99999
YOR032C	196.395	0.0946976	0.167219	0.566309	0.571184	NA
YKL093W	841.852	-0.00966859	0.263093	-0.0367497	0.970685	0.99999
YMR002W	3199.47	0.170574	0.162856	1.04739	0.294918	0.99999
YLR145W	249.165	0.0465145	0.210573	0.220895	0.825174	NA
YLR261C	298.756	-0.0470242	0.119879	-0.392263	0.694864	0.99999
YDL246C	170.8	-0.681411	1.21842	-0.559259	0.575985	NA
YER081W	2215.78	-0.0238922	0.240068	-0.0995224	0.920723	0.99999
YPL178W	1084.68	0.0149885	0.0870718	0.172139	0.863328	0.99999
YPR202W	253.733	-0.26134	0.637797	-0.409754	0.681987	NA
YIL096C	272.06	0.0824682	0.429436	0.192039	0.847712	NA
YFR011C	787.751	-0.190359	0.0834398	-2.28139	0.0225255	0.99999
YIL074C	1602.05	-0.111999	0.114976	-0.97411	0.330002	0.99999
YGL173C	4166.29	0.0504223	0.163981	0.307489	0.758471	0.99999
YHL008C	604.197	0.0493417	0.0962942	0.512406	0.608367	0.99999
YLR457C	332.112	-0.118001	0.127523	-0.925326	0.354796	0.99999
YNL249C	347.315	-0.11017	0.139351	-0.790595	0.429181	0.99999
YGR056W	773.033	0.0517834	0.206684	0.250543	0.802167	0.99999
YGL065C	815.207	-0.091379	0.19876	-0.459745	0.645699	0.99999
YOR052C	1450.08	0.133278	0.267402	0.49842	0.618188	0.99999
YGR116W	3102.15	-0.117964	0.23657	-0.498642	0.618032	0.99999
YOR343C	29.143	-0.291866	0.275762	-1.0584	0.289874	NA
YGL230C	5.90464	-0.0797628	0.594046	-0.13427	0.893189	NA
YOL159C	179.785	-0.18597	0.166093	-1.11968	0.262852	NA
YBR185C	403.043	0.0781341	0.104737	0.746005	0.455664	0.99999
YOR010C	217.206	0.438561	0.183874	2.38512	0.0170737	NA
YDR019C	776.515	-0.0980349	0.119836	-0.818077	0.413313	0.99999
YBR150C	756.16	0.101829	0.144826	0.703116	0.481984	0.99999
YIR042C	63.0166	-0.423287	0.440646	-0.960607	0.33675	NA
YER119C	837.636	0.0155544	0.307253	0.050624	0.959625	0.99999
YMR196W	2104.64	-0.0935884	0.263022	-0.35582	0.721976	0.99999
YMR161W	704.702	0.112357	0.105496	1.06503	0.286861	0.99999
YDR499W	546.721	0.00853168	0.201455	0.0423502	0.96622	0.99999
YKL068W-A	169.061	-0.0932063	0.173455	-0.537353	0.591024	NA
YJL133C-A	618.358	-0.166463	0.350445	-0.475003	0.634785	0.99999
YDL215C	4192.65	-0.249712	0.223093	-1.11932	0.263004	0.99999
YJR120W	98.3446	-0.420767	0.227286	-1.85127	0.0641312	NA
YLL061W	331.689	0.148719	0.118351	1.25659	0.208903	0.99999
YDR110W	474.78	0.0717133	0.24313	0.294958	0.768026	0.99999
YDR419W	526.478	-0.00702296	0.0754744	-0.0930509	0.925863	0.99999
YOR221C	653.598	-0.0182538	0.090809	-0.201013	0.840689	0.99999
YPL214C	744.832	-0.0054162	0.069702	-0.0777051	0.938063	0.99999
YBL108C-A	24.4651	0.00286204	0.30613	0.0093491	0.992541	NA
YGL165C	4.17646	0.0838237	0.68996	0.121491	0.903302	NA
YOL064C	1042.63	-0.0615866	0.0756349	-0.814262	0.415495	0.99999
YBL023C	768.953	-0.0710955	0.0867728	-0.819329	0.412599	0.99999
YOR274W	615.482	0.0200173	0.132129	0.151498	0.879583	0.99999
YOR329C	1610.52	-0.00291063	0.13797	-0.0210961	0.983169	0.99999
YLR005W	903.239	0.0229817	0.111208	0.206655	0.836279	0.99999
YDR124W	116.849	0.0561609	0.18592	0.30207	0.762599	NA
YNL267W	1359.55	-0.069741	0.120807	-0.577294	0.563741	0.99999
YBR134W	1.66699	0.525841	1.14168	0.460584	0.645097	NA
YLR461W	10.0326	0.658754	0.421699	1.56214	0.118255	NA
YLR050C	391.915	-0.0642337	0.160539	-0.400112	0.689074	0.99999
YOR124C	1291.26	-0.0153633	0.176257	-0.0871643	0.930541	0.99999
YDR067C	367.06	-0.178372	0.215284	-0.82854	0.407365	0.99999
YMR056C	329.172	0.053333	0.253558	0.210338	0.833404	0.99999
YHR032W-A	64.5368	0.094301	0.185478	0.50842	0.611159	NA
YJL044C	944.474	-0.0954178	0.144439	-0.660611	0.508862	0.99999
YPR164W	646.825	-0.0805558	0.319422	-0.252193	0.800892	0.99999
YEL060C	18640.2	0.0832443	0.12414	0.67057	0.502495	0.99999
YHR195W	781.806	0.0392182	0.235105	0.166812	0.867518	0.99999
YLR101C	20.0198	-0.106779	0.315114	-0.338857	0.734717	NA
YBL107W-A	8.87168	0.537945	0.810272	0.663907	0.50675	NA
YML026C	8471.46	0.0384217	0.161696	0.237618	0.812178	0.99999
YPR066W	217.004	0.0617899	0.166936	0.370141	0.711278	NA
YDR073W	570.339	0.0162887	0.131838	0.123551	0.901671	0.99999
YDR229W	876.318	0.101759	0.149781	0.679381	0.496896	0.99999
YDL181W	1492.45	-0.489825	0.192759	-2.54113	0.0110496	0.99999
YBR022W	342.967	0.139855	0.123785	1.12982	0.258551	0.99999
YER177W	13829.8	0.0583322	0.202042	0.288713	0.772801	0.99999
YML048W	4708.4	0.143477	0.117984	1.21607	0.223957	0.99999
YBL064C	2836.22	-0.023505	0.303895	-0.0773458	0.938348	0.99999
YIL045W	477.104	-0.256949	0.369453	-0.695485	0.486751	0.99999
YKL221W	28.5359	0.190205	0.294173	0.646577	0.517906	NA
YGL126W	2313.91	-0.0409803	0.264592	-0.154881	0.876915	0.99999
YLR167W	29460.6	0.0620667	0.169703	0.365737	0.714562	0.99999
YMR270C	686.957	0.101384	0.0939169	1.07951	0.280359	0.99999
YLR293C	7269.52	0.0761456	0.0810148	0.939898	0.34727	0.99999
YLR228C	870.193	0.102967	0.0988914	1.04121	0.297778	0.99999
YJR053W	133.052	0.0368428	0.173871	0.211898	0.832187	NA
YJL171C	5315.12	0.104732	0.138378	0.756854	0.449138	0.99999
YDR374C	8.94189	-0.394109	0.583303	-0.67565	0.499263	NA
YKL021C	1022.4	0.0790151	0.16547	0.477518	0.632993	0.99999
YDL167C	724.78	-0.00132677	0.356355	-0.00372317	0.997029	0.99999
YLR388W	2858.8	0.0191652	0.150998	0.126923	0.899001	0.99999
YLR373C	907.964	-0.118486	0.254629	-0.465327	0.641697	0.99999
YKR001C	3658.51	-0.0238908	0.0927707	-0.257526	0.796773	0.99999
YKR054C	884.817	0.022783	0.220919	0.103128	0.917861	0.99999
YIR034C	983.292	0.0815067	0.103195	0.789831	0.429626	0.99999
YGL013C	1023.07	0.0521899	0.22963	0.227278	0.820208	0.99999
YJR068W	995.522	0.000224884	0.0812181	0.0027689	0.997791	0.99999
YGR207C	1428.89	0.0530509	0.113345	0.468047	0.639751	0.99999
YDR212W	2570.32	0.179644	0.0934347	1.92267	0.0545214	0.99999
YNL052W	2538.58	-0.300463	0.164073	-1.83128	0.0670593	0.99999
YGL188C	277.034	-0.41324	0.173375	-2.38351	0.0171486	NA
YNL025C	314.572	0.0937478	0.15221	0.615912	0.537953	0.99999
YGR121W-A	2.91518	-0.947607	0.89844	-1.05472	0.291551	NA
YGR091W	331.89	-0.0371141	0.0919263	-0.403738	0.686406	0.99999
YDL232W	141.852	0.00775672	0.280895	0.0276143	0.97797	NA
YPL119C	280.931	0.105284	0.142144	0.740684	0.458885	0.99999
YLR242C	255.329	-0.0420585	0.325978	-0.129023	0.89734	NA
YMR031W-A	1.46493	-0.100805	1.06778	-0.0944061	0.924787	NA
YJR148W	1825.26	-0.0829917	0.20046	-0.414006	0.67887	0.99999
YJR082C	400.786	0.0250543	0.120421	0.208055	0.835186	0.99999
YOL087C	2221.32	0.0385695	0.099639	0.387092	0.698688	0.99999
YNL134C	10558.1	0.14155	0.178404	0.793425	0.42753	0.99999
YAL037W	104.872	0.128136	0.196935	0.650648	0.515274	NA
YGL146C	315.842	-0.0246212	0.151669	-0.162335	0.871042	0.99999
YBR262C	671.029	0.238497	0.239974	0.993846	0.320298	0.99999
YPL199C	891.304	-0.0354547	0.0842717	-0.420719	0.67396	0.99999
YML101C-A	18.9949	0.0812801	0.43955	0.184917	0.853294	NA
YFL036W	1390.07	0.0970666	0.179042	0.542143	0.58772	0.99999
YDL209C	222.659	0.0126552	0.217499	0.0581851	0.953601	NA
YIL051C	1759.52	0.0164229	0.178171	0.092175	0.926559	0.99999
YPL057C	2758.15	0.053339	0.122618	0.435003	0.66356	0.99999
YNR010W	359.51	0.0809853	0.0858473	0.943364	0.345495	0.99999
YDR365C	4183.46	0.0191377	0.148081	0.129238	0.897169	0.99999
YNL169C	2490.87	-0.0207367	0.126828	-0.163503	0.870122	0.99999
YFR034C	523.598	0.0639261	0.140593	0.45469	0.649332	0.99999
YHR070W	606.33	0.0690142	0.194558	0.354724	0.722797	0.99999
YDR460W	524.775	-0.0768607	0.121517	-0.632512	0.527052	0.99999
YNL112W	5255.4	0.0484323	0.401761	0.12055	0.904048	0.99999
YHL047C	1727.1	0.432255	0.137907	3.13439	0.00172214	0.431053
YOR360C	860.593	0.0442062	0.300346	0.147184	0.882987	0.99999
YOR335C	5009.07	-0.00536994	0.21142	-0.0253994	0.979736	0.99999
YGL251C	272.48	-0.0543316	0.174261	-0.311783	0.755206	NA
YER156C	2487.49	0.0156481	0.109093	0.143438	0.885944	0.99999
YPL255W	431.741	0.0653379	0.129225	0.505612	0.613129	0.99999
YOR095C	776.783	-0.0611286	0.250278	-0.244242	0.807043	0.99999
YEL038W	524.219	0.0666919	0.248371	0.268517	0.788301	0.99999
YCL014W	697.102	-0.041319	0.188348	-0.219375	0.826358	0.99999
YOL025W	410.629	-0.0246387	0.168012	-0.146648	0.88341	0.99999
YPL208W	602.058	-0.065802	0.0967017	-0.680464	0.496211	0.99999
YOL147C	631.05	0.0796205	0.163385	0.487319	0.626033	0.99999
YNL280C	1083.4	-0.00564871	0.0728101	-0.0775814	0.938161	0.99999
YDR007W	904.344	0.0931851	0.196797	0.473509	0.63585	0.99999
YIL160C	110.678	-0.208873	0.25448	-0.820783	0.41177	NA
YPR089W	1178.46	-0.076333	0.226371	-0.337203	0.735964	0.99999
YBR233W	729.097	0.0271715	0.0887795	0.306056	0.759562	0.99999
YPL122C	448.706	-0.0285633	0.233524	-0.122314	0.90265	0.99999
YKL104C	5177.09	-0.180791	0.185161	-0.976403	0.328865	0.99999
YMR313C	856.734	-0.0929524	0.0900849	-1.03183	0.302151	0.99999
YGL179C	452.124	-0.13418	0.219042	-0.612579	0.540155	0.99999
YGR120C	290.756	0.00707042	0.126373	0.0559488	0.955383	0.99999
YML001W	1504.28	-0.00757255	0.127848	-0.059231	0.952768	0.99999
YLL028W	405.884	-0.0163579	0.278693	-0.0586948	0.953195	0.99999
YER016W	877.85	0.0137421	0.113507	0.121069	0.903637	0.99999
YHR061C	415.192	0.162951	0.168649	0.966218	0.333935	0.99999
YDR438W	308.48	0.0793191	0.110557	0.717449	0.473097	0.99999
YNL211C	68.3309	-0.374032	0.353574	-1.05786	0.290119	NA
YLR124W	1.77599	-0.974497	1.02908	-0.946959	0.34366	NA
YML058W-A	15.8416	-0.0263965	0.418879	-0.0630171	0.949753	NA
YLR026C	890.515	0.110431	0.0932251	1.18456	0.236191	0.99999
YJR065C	4620.23	0.0143082	0.163887	0.0873053	0.930429	0.99999
YDL131W	3003.76	0.0246708	0.050597	0.487595	0.625837	0.99999
YMR095C	33.3331	-0.324535	0.283247	-1.14577	0.251891	NA
YER138C	23760.6	-0.15989	0.242192	-0.660177	0.50914	0.99999
YDL033C	269.012	0.221699	0.171403	1.29344	0.19586	NA
YMR255W	1016.95	0.0521038	0.0989463	0.526587	0.598481	0.99999
YHR209W	442.248	-0.0512392	0.216957	-0.236172	0.813299	0.99999
YGL247W	195.672	0.0572487	0.119541	0.478905	0.632006	NA
YCR100C	101.699	-0.233759	0.180599	-1.29435	0.195544	NA
YDR516C	4628.07	0.0349483	0.40181	0.0869771	0.93069	0.99999
Q0130	1.90608	1.47414	1.15356	1.27791	0.201281	NA
YPL233W	550.317	0.0528962	0.144848	0.365183	0.714975	0.99999
YOR255W	2.7921	-0.0954877	0.815161	-0.11714	0.906749	NA
YOR063W	44895.9	0.104713	0.125968	0.831265	0.405824	0.99999
YGR251W	243.765	0.137785	0.187805	0.733663	0.463154	NA
YPR047W	414.623	0.0405422	0.104074	0.389551	0.696869	0.99999
YDR246W-A	14.6837	0.295686	0.374326	0.789916	0.429577	NA
YDR044W	776.205	0.050425	0.154373	0.326644	0.743937	0.99999
YEL016C	596.81	0.0345222	0.101446	0.340301	0.73363	0.99999
YAL027W	295.071	0.109503	0.128031	0.855278	0.392397	0.99999
YKL153W	15.9996	0.522546	0.47794	1.09333	0.274249	NA
YFL019C	9.16938	0.488737	0.671029	0.728339	0.466406	NA
YMR139W	1122.6	-0.0495495	0.132695	-0.37341	0.708843	0.99999
YDL080C	792.828	-0.023858	0.104381	-0.228567	0.819205	0.99999
YOR172W	666.619	-0.108533	0.246979	-0.439443	0.660341	0.99999
YOR105W	155.587	-0.13236	0.222435	-0.595052	0.551809	NA
YJL138C	11380	0.0899034	0.122158	0.73596	0.461755	0.99999
YPR143W	708.037	0.0980503	0.277201	0.353715	0.723552	0.99999
YDR340W	150.67	-0.0186972	0.717409	-0.0260621	0.979208	NA
YNL322C	3106.31	0.044429	0.21409	0.207525	0.8356	0.99999
YPL090C	12672.5	0.110831	0.149806	0.739831	0.459403	0.99999
YPR078C	4.89597	-0.426263	0.824553	-0.516962	0.605182	NA
YCR075C	416.379	-0.0328427	0.262332	-0.125195	0.900369	0.99999
YFL062W	10.1872	-1.06696	0.803725	-1.32752	0.184336	NA
YDR171W	10294.2	0.309717	1.08063	0.286607	0.774413	0.99999
YLR439W	759.64	0.110383	0.145235	0.760033	0.447235	0.99999
YCR020C	123.648	0.0871062	0.135887	0.641018	0.521511	NA
YDR450W	9144.15	0.035651	0.149747	0.238075	0.811823	0.99999
YCL051W	946.192	0.0427715	0.196822	0.217311	0.827966	0.99999
YCR097W	661.497	0.0282365	0.0796935	0.354314	0.723103	0.99999
YDR235W	732.191	-0.0521152	0.401029	-0.129954	0.896603	0.99999
YGL194C-A	98.9578	-0.238993	0.218291	-1.09484	0.273589	NA
YER038C	194.564	-0.0432589	0.260427	-0.166108	0.868072	NA
YPR125W	896.427	0.0764711	0.266128	0.287347	0.773847	0.99999
YHR049W	2039.88	0.248248	0.122881	2.02024	0.0433588	0.99999
YBR007C	641.425	0.123465	0.127332	0.96963	0.332231	0.99999
YPL001W	392.159	-0.08968	0.207833	-0.4315	0.666105	0.99999
YJL038C	4.90003	0.633212	0.593781	1.06641	0.28624	NA
YNL319W	7.98214	-0.102602	1.00447	-0.102145	0.918642	NA
YPR178W	542.819	-0.0439933	0.109063	-0.403377	0.686671	0.99999
YDR475C	927.963	0.0509089	0.136109	0.37403	0.708382	0.99999
TLC1	1062.94	-0.0530189	0.136788	-0.387601	0.698312	0.99999
YNL159C	537.374	-0.0155683	0.125134	-0.124413	0.900988	0.99999
YAL014C	762.544	0.106996	0.144834	0.738746	0.460061	0.99999
YCR020W-B	142.575	-0.35262	0.395663	-0.891214	0.372814	NA
YBR243C	1146.23	-0.0289005	0.0933231	-0.309683	0.756802	0.99999
YLR181C	513.109	0.0300386	0.078719	0.381592	0.702764	0.99999
YBL056W	2814.58	0.0870468	0.0748027	1.16369	0.244552	0.99999
YNL075W	644.466	0.057778	0.326766	0.176818	0.859652	0.99999
YPL150W	943.414	-0.006997	0.186376	-0.0375424	0.970053	0.99999
YJL012C	1983.71	-0.0629955	0.10322	-0.610302	0.541662	0.99999
YJL065C	489.902	0.117071	0.209381	0.559131	0.576073	0.99999
YKR020W	435.936	0.022047	0.0989395	0.222833	0.823666	0.99999
YMR053C	292.28	-0.0886317	0.222635	-0.398104	0.690554	0.99999
YKL066W	442.49	-0.154873	0.0843783	-1.83546	0.0664376	0.99999
YMR004W	1230.27	0.0621619	0.0749047	0.82988	0.406607	0.99999
YER083C	1280.77	0.0486968	0.172563	0.282198	0.777792	0.99999
YPL176C	1072.63	-0.00219117	0.115814	-0.0189198	0.984905	0.99999
YHR172W	289.806	0.0239035	0.243342	0.0982303	0.921749	0.99999
YLR263W	232.07	-0.136623	0.2886	-0.4734	0.635928	NA
YDL240W	1096.39	-0.0844798	0.293703	-0.287637	0.773625	0.99999
YDR401W	10.5798	-0.143934	0.474541	-0.303312	0.761652	NA
YHR013C	893.521	0.0398923	0.0841068	0.474305	0.635282	0.99999
YOL040C	13045.2	0.0454843	0.138956	0.327328	0.74342	0.99999
YGR072W	571.079	-0.0125169	0.10916	-0.114666	0.90871	0.99999
YCL035C	2409.43	0.0171724	0.291086	0.0589945	0.952957	0.99999
YIL023C	830.328	0.0447012	0.230854	0.193634	0.846462	0.99999
YNR073C	75.0335	-0.134259	0.349098	-0.384588	0.700543	NA
YPR200C	53.2183	-0.122811	0.235361	-0.521799	0.60181	NA
YIL072W	91.6785	-0.298717	0.170616	-1.75081	0.0799781	NA
YLR327C	7341.65	0.314153	0.587751	0.5345	0.592996	0.99999
YBR229C	1167.87	-0.0676279	0.10813	-0.62543	0.531689	0.99999
YML133C	312.483	-0.121944	0.321061	-0.379815	0.704083	0.99999
YOR131C	638.578	0.0716488	0.218433	0.328013	0.742902	0.99999
YLR455W	509.55	0.0940228	0.115318	0.815332	0.414882	0.99999
YNL247W	3131.61	0.0132428	0.167822	0.0789099	0.937104	0.99999
YOR054C	791.821	0.0303507	0.264065	0.114937	0.908495	0.99999
YGL007C-A	12.8274	-0.0146601	0.437929	-0.0334759	0.973295	NA
YFR028C	900.418	0.0564215	0.110367	0.511215	0.6092	0.99999
YOR009W	273.473	-0.0580803	0.213474	-0.272072	0.785567	NA
YOR072W	11.935	-0.779516	0.461106	-1.69054	0.0909256	NA
YDR292C	1643.96	-0.124551	0.11543	-1.07902	0.280581	0.99999
YOR161C-C	5.08149	0.0871116	0.620849	0.140311	0.888415	NA
YHR126C	4.19523	-1.09874	0.766088	-1.43423	0.151508	NA
YMR194W	2060.45	0.162072	0.193942	0.835672	0.403339	0.99999
YAL016C-A	2.27981	-0.767773	1.05179	-0.729966	0.465411	NA
YMR167W	374.177	-0.0872449	0.189675	-0.45997	0.645538	0.99999
YOR249C	384.824	-0.0942596	0.2284	-0.412695	0.67983	0.99999
YER117W	8063.59	0.0883621	0.22752	0.388371	0.697741	0.99999
YOR301W	489.496	-0.116452	0.143149	-0.813504	0.415929	0.99999
YPL187W	7.08888	0.285541	0.756679	0.37736	0.705906	NA
YKL218C	1175.75	0.0326219	0.11177	0.291866	0.770389	0.99999
YOR140W	1054.43	0.0693324	0.269516	0.257248	0.796987	0.99999
YDR391C	1135.63	-0.0616557	0.177469	-0.347418	0.728278	0.99999
YLL063C	214.74	-0.173517	0.152399	-1.13857	0.254881	NA
YOR276W	2423.62	0.109622	0.117013	0.936842	0.34884	0.99999
YMR309C	2880.84	-0.0253474	0.586168	-0.0432426	0.965508	0.99999
YOR089C	1575.26	0.0939674	0.157519	0.596545	0.550811	0.99999
tD(GUC)N	4.36096	0.917952	1.2889	0.712198	0.476342	NA
YGR258C	934.127	0.031561	0.0818999	0.385361	0.69997	0.99999
YNL146C-A	12.8616	-0.108485	0.594206	-0.182572	0.855134	NA
YMR180C	417.792	-0.0249625	0.102027	-0.244665	0.806716	0.99999
YGL163C	606.051	0.117313	0.0926319	1.26644	0.205356	0.99999
YDR417C	4.29444	1.00924	0.718753	1.40416	0.160273	NA
YOL131W	6.17531	1.0906	0.634842	1.71791	0.0858135	NA
YPL283C	1215.83	-0.0934183	0.285941	-0.326705	0.743891	0.99999
YBL021C	289.991	-0.0027858	0.163534	-0.017035	0.986409	0.99999
YHR215W	214.245	-0.0186329	0.380663	-0.0489486	0.96096	NA
YLL045C	14237.7	0.0900147	0.122837	0.732801	0.46368	0.99999
YLR156W	27.5623	-0.161579	0.26428	-0.611395	0.540938	NA
YLR007W	598.722	0.0134748	0.112465	0.119814	0.904631	0.99999
YNL261W	384.716	-0.100384	0.255271	-0.393245	0.694139	0.99999
YNL305C	1338.47	-0.112085	0.346898	-0.323106	0.746615	0.99999
YJL046W	407.558	0.0404541	0.102705	0.393885	0.693666	0.99999
YKR078W	409.126	0.00236988	0.208757	0.0113523	0.990942	0.99999
YOR191W	1215.56	-0.0439252	0.188533	-0.232984	0.815774	0.99999
YEL074W	66.7105	-0.107465	0.196576	-0.546685	0.584595	NA
YDR272W	1336.18	-0.0387299	0.24548	-0.157772	0.874637	0.99999
YGR289C	843.194	0.0756654	0.277621	0.272549	0.7852	0.99999
YML020W	684.957	-0.132538	0.116097	-1.14161	0.253615	0.99999
YLR103C	320.935	0.124555	0.169427	0.735156	0.462244	0.99999
YOR294W	656.718	0.13291	0.240514	0.552607	0.580533	0.99999
YEL062W	346.24	-0.0856147	0.143486	-0.596676	0.550723	0.99999
YPR064W	5.38235	-0.541379	0.613013	-0.883144	0.377159	NA
YPR031W	438.031	0.0362863	0.176707	0.205347	0.837301	0.99999
YLR038C	1626.79	-0.278194	0.131369	-2.11765	0.0342048	0.99999
YNL096C	3652.23	0.0838195	0.139706	0.599972	0.548525	0.99999
YDR038C	1741.82	0.00418301	0.147884	0.0282858	0.977434	0.99999
YDL187C	10.1961	0.155992	0.428157	0.364333	0.715609	NA
YBR024W	382.417	0.00404328	0.200705	0.0201453	0.983927	0.99999
YER171W	906.174	-0.0371761	0.233718	-0.159064	0.873618	0.99999
YDL047W	1518.85	0.0898064	0.135371	0.663408	0.50707	0.99999
YML046W	600.25	-0.145196	0.347495	-0.417836	0.676067	0.99999
YGL124C	541.352	-0.103754	0.118701	-0.874085	0.382072	0.99999
YMR276W	2901.03	0.167945	0.172638	0.972818	0.330644	0.99999
YEL059W	17.7953	-0.210005	0.340447	-0.616849	0.537334	NA
YDL160C-A	125.676	-0.22747	0.169825	-1.33944	0.180428	NA
YLR165C	298.266	-0.0344567	0.107391	-0.320853	0.748322	0.99999
YCR069W	1920.01	0.124439	0.195773	0.635629	0.525018	0.99999
YGR146C-A	4.33363	-0.164201	0.694924	-0.236287	0.81321	NA
YKL027W	874.941	0.0833878	0.0934813	0.892027	0.372379	0.99999
YJL173C	552.22	0.10123	0.133036	0.76092	0.446705	0.99999
YDR152W	1218.61	0.0843151	0.0995021	0.84737	0.396789	0.99999
YKL127W	2301.67	0.00751839	0.0758889	0.099071	0.921082	0.99999
YDR309C	3649.14	-0.127093	0.141558	-0.897818	0.369283	0.99999
YLR386W	711.54	-0.0735239	0.157801	-0.465929	0.641267	0.99999
YLR371W	1304.57	-0.0157019	0.142823	-0.10994	0.912457	0.99999
YDL169C	421.454	0.0589751	0.169669	0.347589	0.728149	0.99999
YLR092W	326.111	-0.00431741	0.11587	-0.0372609	0.970277	0.99999
YER044C	604.47	0.122665	0.188467	0.650854	0.515141	0.99999
YMR072W	2639.67	-0.0056167	0.155165	-0.0361982	0.971124	0.99999
YJR033C	868.27	-0.0573535	0.14169	-0.404782	0.685638	0.99999
YKR056W	901.717	0.019634	0.381507	0.0514643	0.958956	0.99999
YGL011C	3231	0.0805245	0.145415	0.553755	0.579747	0.99999
YIR036C	873.777	0.0879302	0.274748	0.320039	0.748938	0.99999
YMR123W	644.928	0.0633878	0.105611	0.6002	0.548373	0.99999
YDR406W	996.725	0.253161	0.121322	2.08669	0.0369165	0.99999
YGR073C	59.0259	0.0685057	0.225728	0.303487	0.761519	NA
YGR209C	3654.71	0.154993	0.24241	0.639383	0.522574	0.99999
YJL150W	2.74436	0.525638	0.872459	0.602479	0.546856	NA
tS(UGA)E	2.86313	0.0866234	0.884933	0.0978871	0.922022	NA
YNL050C	408.885	0.0261998	0.160806	0.162928	0.870575	0.99999
YMR304C-A	2579.09	-0.0747371	0.30041	-0.248784	0.803528	0.99999
YLR240W	702.865	-0.120946	0.121382	-0.996409	0.319052	0.99999
YGR093W	588.739	0.00279011	0.286744	0.00973031	0.992236	0.99999
YDL234C	4499.04	0.06209	0.121449	0.511245	0.60918	0.99999
YNL136W	797.22	0.0878691	0.124292	0.706958	0.479593	0.99999
YKL049C	434.129	-0.0610764	0.116114	-0.526004	0.598886	0.99999
YJR080C	1222.04	-0.0642136	0.0584565	-1.09848	0.271993	0.99999
YNR038W	610.419	-0.00478474	0.294634	-0.0162396	0.987043	0.99999
YGL140C	1410.94	-0.0351854	0.144384	-0.243694	0.807468	0.99999
YCL029C	717.491	0.0602064	0.1125	0.535166	0.592535	0.99999
YFL038C	5271.82	0.0684156	0.202182	0.338386	0.735072	0.99999
YJR131W	538.408	0.0181446	0.102272	0.177416	0.859182	0.99999
YNR012W	464.724	-0.024351	0.216942	-0.112247	0.910628	0.99999
YNL110C	963.158	0.0941019	0.316168	0.297633	0.765984	0.99999
YDR367W	388	0.100784	0.228053	0.441933	0.658538	0.99999
YIL053W	6193.67	0.0779911	0.132079	0.590488	0.554864	0.99999
YPL059W	867.229	-0.0221749	0.172563	-0.128503	0.897751	0.99999
YGL253W	21882.4	0.269308	0.137518	1.95835	0.0501884	0.99999
YHL032C	2262.07	0.0210323	0.210377	0.0999745	0.920365	0.99999
YJL010C	743.94	0.059877	0.404237	0.148124	0.882245	0.99999
YHL045W	2.34003	-0.790933	0.906986	-0.872045	0.383184	NA
YOR337W	510.11	0.00631847	0.317297	0.0199134	0.984112	0.99999
YMR010W	982.925	0.0376718	0.396422	0.0950296	0.924291	0.99999
YOR097C	358.203	-0.114783	0.183429	-0.625765	0.531469	0.99999
YHR118C	246.253	-0.0622406	0.145318	-0.428308	0.668427	NA
YGR024C	810.95	-0.0790672	0.217338	-0.363798	0.716009	0.99999
YOL023W	491.833	0.113265	0.0852483	1.32864	0.183965	0.99999
YPL253C	241.498	0.121932	0.144794	0.842107	0.399728	NA
YER154W	1574.43	0.1047	0.113219	0.924756	0.355093	0.99999
YBR300C	1.50957	-2.32457	1.94755	-1.19359	0.232639	NA
YEL036C	1888.26	0.0681396	0.112259	0.606983	0.543862	0.99999
YBR260C	790.559	0.135029	0.10002	1.35001	0.177013	0.99999
YPL124W	169.223	-0.036652	0.158225	-0.231645	0.816814	NA
YAL042W	4016.8	0.049252	0.156643	0.314422	0.7532	0.99999
YAL035W	4336.57	0.146553	0.199126	0.735981	0.461742	0.99999
YNL286W	522.535	-0.115095	0.185113	-0.621757	0.534102	0.99999
YDR001C	3301.2	-0.0286549	0.332665	-0.0861373	0.931357	0.99999
YIL162W	2437.13	0.515237	0.267313	1.92747	0.053921	0.99999
YOL141W	119.075	-0.235502	0.471129	-0.499868	0.617168	NA
YHR145C	63.4405	-0.358373	0.649909	-0.55142	0.581346	NA
YBR195C	336.413	0.000181001	0.145623	0.00124294	0.999008	0.99999
YIL039W	2266.61	0.0192956	0.0782206	0.246682	0.805154	0.99999
YGR122W	657.502	-0.00534521	0.102357	-0.0522211	0.958353	0.99999
YPL092W	624.574	-0.113124	0.107765	-1.04973	0.293844	0.99999
YGR161C-D	305.154	-0.187253	0.311888	-0.600384	0.54825	0.99999
YMR315W	2579.78	-0.105379	0.289981	-0.363401	0.716305	0.99999
YGR213C	161.58	0.0597682	0.133455	0.447854	0.654258	NA
YDR384C	794.51	0.21744	0.200048	1.08694	0.277064	0.99999
YML007W	2601.47	0.152881	0.097657	1.56549	0.117467	0.99999
YER063W	1551.1	0.0261185	0.106997	0.244104	0.807151	0.99999
YDR481C	2203.55	-0.0384075	0.186142	-0.206335	0.836529	0.99999
YER014W	575.431	-0.031585	0.166613	-0.189571	0.849646	0.99999
YPR041W	3440.19	0.0561132	0.173609	0.323216	0.746532	0.99999
YNL213C	489.47	-0.00461378	0.140758	-0.032778	0.973852	0.99999
YKL006C-A	309.427	0.123565	0.281845	0.438416	0.661085	0.99999
YBR058C	1291.96	-0.0842991	0.125937	-0.669377	0.503255	0.99999
YLR024C	411.737	-0.0699856	0.326465	-0.214374	0.830255	0.99999
YLR071C	1131.99	-0.112609	0.288047	-0.390941	0.695841	0.99999
YHR092C	123.711	0.0986057	0.266346	0.370217	0.711221	NA
YDL199C	321.13	-0.190145	0.240157	-0.791755	0.428504	0.99999
YHL007C	1979.69	-0.0186353	0.114867	-0.162235	0.871121	0.99999
YER181C	1.77263	0.750515	1.0509	0.714167	0.475124	NA
YNL228W	3.1388	-0.0133098	0.767142	-0.0173499	0.986157	NA
YDL064W	674.44	-0.00430213	0.1307	-0.0329159	0.973742	0.99999
YDL031W	1369.88	0.036296	0.336641	0.107818	0.91414	0.99999
YMR257C	460.823	-0.0639651	0.34294	-0.18652	0.852037	0.99999
YDR046C	2249.32	-0.102628	0.245319	-0.418346	0.675694	0.99999
YOR253W	512.166	0.00761681	0.145054	0.0525101	0.958122	0.99999
YOR202W	670.196	-0.0114325	0.166164	-0.0688025	0.945147	0.99999
YGL245W	7743.26	0.0540167	0.0608451	0.887774	0.374662	0.99999
YGR006W	185.91	-0.00570747	0.125123	-0.0456147	0.963617	NA
YGR079W	432.645	0.0413313	0.38448	0.107499	0.914393	0.99999
YDL119C	263.801	-0.0809689	0.217275	-0.372657	0.709404	NA
YKL151C	1055.96	-0.0667598	0.310753	-0.214832	0.829898	0.99999
YGL198W	1285.27	0.0356611	0.266376	0.133875	0.893502	0.99999
YDL086W	1292.81	0.0774686	0.228317	0.339303	0.734382	0.99999
YBL091C-A	376.657	0.0748523	0.235048	0.318456	0.750139	0.99999
YLR361C-A	192.306	0.0682615	0.215752	0.316389	0.751707	NA
YHR038W	281.153	0.106845	0.127417	0.838543	0.401726	0.99999
YML069W	2366.47	0.0296606	0.111427	0.26619	0.790093	0.99999
YKR019C	409.789	0.0797391	0.0983397	0.810853	0.41745	0.99999
YJR073C	10733.1	0.0868818	0.250791	0.346431	0.729019	0.99999
YGR279C	10540.2	0.124257	0.094333	1.31722	0.187765	0.99999
YCR073C	327.722	0.219733	0.236819	0.927852	0.353484	0.99999
YCR022C	9.35631	0.0916314	0.438881	0.208784	0.834617	NA
YLL015W	1504.63	0.0220421	0.180994	0.121783	0.903071	0.99999
YNL195C	96.3431	-0.319152	0.500735	-0.637367	0.523886	NA
YDL134C	2343.7	-0.0336729	0.100415	-0.335339	0.737369	0.99999
YFL060C	192.876	-0.189167	0.259702	-0.728401	0.466368	NA
YDR173C	249.536	-0.110908	0.179857	-0.616647	0.537468	NA
YMR100W	638.807	-0.0088274	0.200201	-0.0440926	0.964831	0.99999
YCL057W	2842.04	-0.00462275	0.0699526	-0.066084	0.947311	0.99999
YBR072W	1426.33	-0.362252	0.895956	-0.404318	0.685979	0.99999
YBR005W	1619.55	0.216836	0.248083	0.874048	0.382092	0.99999
YPR123C	41.3312	-0.017295	0.250463	-0.0690519	0.944948	NA
RUF5-2	1250.87	1.10373	0.255997	4.31148	1.62163e-05	0.0109529
YDL173W	2136.03	-0.00662752	0.190926	-0.0347124	0.972309	0.99999
YJR047C	30.8559	0.175889	0.308945	0.56932	0.569139	NA
YMR006C	1808.8	0.411429	0.199864	2.05854	0.0395381	0.99999
YKL145W-A	35.4308	0.245003	0.472298	0.518747	0.603937	NA
YAL016W	2945.45	-0.0544223	0.110943	-0.490542	0.62375	0.99999
YMR292W	439.816	0.0786042	0.293606	0.26772	0.788915	0.99999
YHR011W	292.262	0.101093	0.112894	0.895467	0.370537	0.99999
YPL152W	382.7	0.0512602	0.234818	0.218297	0.827198	0.99999
YLR183C	815.496	0.0502224	0.0815253	0.616035	0.537871	0.99999
YNL077W	1641.74	0.428999	0.629898	0.68106	0.495833	0.99999
YBR109C	2458.39	0.0543234	0.107453	0.505552	0.613171	0.99999
YBR172C	1540.33	0.0356335	0.202934	0.175592	0.860615	0.99999
YDR346C	2381.34	0.033979	0.154665	0.219695	0.826109	0.99999
YAR002C-A	3060.86	-0.0556263	0.130828	-0.425187	0.670701	0.99999
YOL077W-A	1404.9	-0.458925	0.160542	-2.8586	0.00425521	0.838276
YPL029W	367.764	0.109278	0.125539	0.870473	0.384042	0.99999
YHR146W	3005.78	0.0174457	0.240291	0.0726021	0.942123	0.99999
YDL242W	3.66409	-0.874749	0.725091	-1.2064	0.227664	NA
YBR189W	14301.7	0.0474032	0.131832	0.359573	0.719166	0.99999
YER085C	5.54986	0.065268	0.596808	0.109362	0.912916	NA
YJL225C	2152.36	-0.0983545	0.188712	-0.521188	0.602236	0.99999
YKL064W	2025.42	0.00151562	0.148776	0.0101872	0.991872	0.99999
YLR265C	406.537	-0.0174222	0.272299	-0.0639817	0.948985	0.99999
YKR022C	610.221	0.0153294	0.0991304	0.154639	0.877106	0.99999
YLR287C	498.308	-0.0281777	0.282257	-0.0998299	0.920479	0.99999
YPL174C	512.06	-0.169443	0.338324	-0.50083	0.616491	0.99999
YOR070C	813.554	0.0291314	0.108782	0.267797	0.788856	0.99999
YDR403W	92.6631	0.058307	0.220703	0.264188	0.791635	NA
YOL093W	419.671	0.00834951	0.117931	0.0708002	0.943557	0.99999
YOL042W	518.879	-0.130634	0.132053	-0.989254	0.322539	0.99999
YIL070C	1027.04	0.217644	0.110437	1.97076	0.0487516	0.99999
YCL037C	18.1749	0.132511	0.347427	0.381406	0.702902	NA
YIL025C	3.95248	0.553744	0.753156	0.735232	0.462198	NA
YDR545C-A	10.9299	0.0939984	0.935629	0.100465	0.919975	NA
YNR071C	32.8183	-0.113862	0.260203	-0.437589	0.661684	NA
YML131W	1124.08	0.0909044	0.137319	0.661993	0.507976	0.99999
YNL245C	368.114	-0.0542339	0.112297	-0.482949	0.629132	0.99999
YNR024W	298.053	0.101843	0.140594	0.72438	0.468832	0.99999
YFL013W-A	3.36145	0.346407	0.755553	0.458482	0.646606	NA
YLR329W	27.2992	-0.283717	0.335542	-0.84555	0.397804	NA
YPL043W	1196.1	0.157483	0.421737	0.373415	0.70884	0.99999
YCL045C	3171.88	-0.0478164	0.108808	-0.439459	0.660329	0.99999
YBR056C-B	1.25652	0.481639	1.17595	0.409574	0.682118	NA
YKL002W	1620.06	0.056134	0.167358	0.335412	0.737314	0.99999
YDR328C	2002.54	0.0811756	0.194508	0.417339	0.676431	0.99999
YIR009W	132.031	0.10132	0.237661	0.426323	0.669873	NA
YBR154C	1356.24	0.0795903	0.134718	0.590791	0.55466	0.99999
YLR001C	821.32	-0.133375	0.12021	-1.10951	0.267209	0.99999
YKR101W	281.334	0.0711682	0.143794	0.49493	0.620649	0.99999
YMR230W-A	3.47576	-0.325421	1.10374	-0.294835	0.76812	NA
YER115C	325.065	0.0295112	0.0918145	0.321422	0.747891	0.99999
YHR124W	142.331	0.0449967	0.155956	0.288522	0.772947	NA
YER148W	1568.98	0.0175885	0.121618	0.144621	0.88501	0.99999
YMR240C	405.864	-0.0224888	0.101769	-0.22098	0.825108	0.99999
YOR303W	2951.4	0.25411	0.133055	1.90981	0.056157	0.99999
YIL087C	380.544	0.018725	0.308977	0.0606033	0.951675	0.99999
YMR192W	597.908	-0.0405674	0.199616	-0.203227	0.838957	0.99999
YJL221C	260.178	-0.00260828	0.170788	-0.015272	0.987815	NA
YMR229C	2216.9	0.0536067	0.541214	0.0990489	0.921099	0.99999
YLL038C	349.691	-0.038741	0.171562	-0.225814	0.821346	0.99999
YOR056C	1090.67	0.0600935	0.158425	0.379319	0.704451	0.99999
YOL108C	543.93	0.0386685	0.184678	0.209384	0.834149	0.99999
YOR270C	6501.49	0.00353608	0.078359	0.0451267	0.964006	0.99999
YDR106W	27.0015	-0.108227	0.315376	-0.343169	0.731471	NA
YOL068C	1523.9	0.0695257	0.121015	0.574523	0.565614	0.99999
YMR182C	272.686	0.154692	0.214968	0.719604	0.471769	NA
YBR201W	572.694	-0.114246	0.201423	-0.567192	0.570584	0.99999
YLL043W	2046.02	0.0418122	0.0980448	0.426461	0.669772	0.99999
YDR415C	608.506	-0.082502	0.130582	-0.631805	0.527514	0.99999
YGL161C	1553.3	-0.0266708	0.207899	-0.128287	0.897922	0.99999
YOL133W	416.981	0.0794957	0.160642	0.494863	0.620697	0.99999
YDL074C	1204.16	0.0675896	0.262104	0.257873	0.796505	0.99999
YNL263C	1234.2	0.0472811	0.14242	0.331982	0.739903	0.99999
YHR217C	20.1288	0.055907	0.338864	0.164983	0.868957	NA
YDR128W	1100.19	-0.116124	0.169792	-0.68392	0.494026	0.99999
YOR193W	239.468	-0.0399494	0.269226	-0.148386	0.882038	NA
YER028C	78.1156	0.120331	0.215127	0.559351	0.575922	NA
YMR052W	163.477	-0.0701058	0.2423	-0.289335	0.772325	NA
YMR294W-A	4.31138	-0.191936	0.651588	-0.294566	0.768326	NA
YKR076W	855.163	0.104611	0.185241	0.564728	0.572259	0.99999
YDR225W	7792.76	0.25843	0.171622	1.50581	0.132116	0.99999
YDR270W	1126.56	-0.0216935	0.206681	-0.104961	0.916407	0.99999
tL(UAG)J	15.0465	0.337815	0.469444	0.719607	0.471767	NA
YPR033C	3614.22	0.0511321	0.102871	0.497052	0.619152	0.99999
YGR230W	201.573	0.058884	0.223858	0.263041	0.792519	NA
YPR062W	1332.6	0.0963223	0.154114	0.625008	0.531966	0.99999
YDR528W	391.518	0.00850458	0.22095	0.038491	0.969296	0.99999
YER173W	461.692	-0.0883557	0.179563	-0.492061	0.622676	0.99999
YBR026C	1690.31	-0.0395842	0.191559	-0.206643	0.836289	0.99999
YDL185W	8699.38	0.0436438	0.104561	0.4174	0.676386	0.99999
YBR091C	152.617	0.154149	0.238556	0.646175	0.518166	NA
YNL094W	1500.54	0.0932604	0.0966419	0.96501	0.33454	0.99999
YGL056C	1539.49	-0.00676952	0.235806	-0.028708	0.977097	0.99999
YPL227C	641.575	-0.0776588	0.117816	-0.659155	0.509796	0.99999
YLR222C-A	15.2858	0.158507	0.933127	0.169867	0.865115	NA
YDL010W	1207.79	-0.0291912	0.110475	-0.264233	0.7916	0.99999
YML019W	685.812	0.00479666	0.198878	0.0241186	0.980758	0.99999
YDL045C	864.549	-0.000557491	0.0909405	-0.00613028	0.995109	0.99999
YLR163C	860.401	0.129895	0.0835694	1.55433	0.120105	0.99999
YLR178C	1631.49	-0.160425	0.643174	-0.249428	0.80303	0.99999
YHL002C-A	1.90746	-0.69885	1.04356	-0.669682	0.50306	NA
YBL079W	1130.34	-0.054724	0.332261	-0.164702	0.869179	0.99999
YNL056W	599.082	0.140796	0.175581	0.801888	0.422618	0.99999
YFL001W	573.47	0.0526287	0.213686	0.246289	0.805458	0.99999
YDR150W	1865.31	-0.0557385	0.177325	-0.31433	0.75327	0.99999
YER147C-A	7.14331	-0.0380013	0.819106	-0.0463936	0.962997	NA
YKL170W	546.656	0.175042	0.152908	1.14475	0.252311	0.99999
YPR157W	129.28	-0.0748693	0.31109	-0.240668	0.809813	NA
YPR137C-B	656.414	0.284672	2.9804	0.0955146	0.923906	0.99999
YLR384C	2151.66	-0.0127578	0.276067	-0.0462128	0.963141	0.99999
YPL060W	309.015	-0.0685845	0.138872	-0.49387	0.621398	0.99999
YML099C	844.625	-0.0510579	0.153651	-0.332299	0.739664	0.99999
YLR421C	1289.92	0.0949321	0.101224	0.937843	0.348325	0.99999
YLR090W	539.703	0.277355	0.114402	2.42439	0.0153339	0.99999
YJR064W	3094.39	0.0906169	0.113771	0.796484	0.425751	0.99999
YML022W	1572.39	0.0809539	0.141717	0.571235	0.567841	0.99999
YER046W	349.782	0.0514187	0.176782	0.290859	0.77116	0.99999
YMR029C	1159.38	-0.0104686	0.107596	-0.0972947	0.922492	0.99999
YIR030C	80.8157	-0.345771	0.369681	-0.935323	0.349622	NA
YKR050W	699.951	-0.0275498	0.0850292	-0.324004	0.745935	0.99999
YMR121C	755.372	0.0532903	0.158983	0.335195	0.737478	0.99999
YGL017W	443.334	0.10435	0.141203	0.739004	0.459904	0.99999
YDL150W	717.155	0.0678952	0.161803	0.419616	0.674766	0.99999
YNL038W	452.541	-0.0448267	0.1761	-0.254553	0.799068	0.99999
YHR001W-A	1147.11	-0.432941	0.0755719	-5.72886	1.01106e-08	1.59343e-05
YOL165C	6.24981	-0.582543	0.587775	-0.991099	0.321637	NA
YIL139C	244.411	-0.056609	0.195524	-0.289525	0.77218	NA
YLR246W	561.769	0.121657	0.135963	0.894776	0.370907	0.99999
YJR119C	272.028	-0.00553065	0.274953	-0.0201149	0.983952	NA
YLR359W	6684.08	-0.127723	0.112422	-1.1361	0.255915	0.99999
YLR199C	842	0.0439452	0.129605	0.339071	0.734556	0.99999
YJL206C	321.538	-0.0353398	0.133682	-0.264357	0.791505	0.99999
YIL142W	3470.25	0.103045	0.0881302	1.16923	0.242309	0.99999
YGL082W	1169.42	0.0229744	0.104698	0.219435	0.826311	0.99999
YNL138W	3717.44	-0.0205549	0.0961683	-0.213739	0.830751	0.99999
YOR133W	23034.5	0.078117	0.0607326	1.28624	0.198358	0.99999
21S_rRNA	39.1646	0.046589	0.230425	0.202187	0.839771	NA
YGL142C	696.433	-0.0587608	0.166506	-0.352905	0.72416	0.99999
YGR179C	378.817	-0.0626103	0.0939956	-0.666098	0.505348	0.99999
YGR102C	394.792	0.0441839	0.202856	0.217809	0.827578	0.99999
YBR139W	2236.93	-0.0891975	0.357546	-0.249471	0.802996	0.99999
YHR188C	2624.76	-0.0149696	0.138001	-0.108475	0.913619	0.99999
YKL106C-A	1.32541	1.29484	1.2726	1.01748	0.308926	NA
YNL116W	556.477	0.0435973	0.12294	0.354621	0.722873	0.99999
YNL139C	1077.26	-0.124698	0.302532	-0.412182	0.680206	0.99999
YDR361C	789.348	-0.0247143	0.25634	-0.0964124	0.923193	0.99999
YGL255W	3561.97	-0.260544	0.246656	-1.0563	0.29083	0.99999
YFR007W	341.22	0.0762839	0.146846	0.519482	0.603425	0.99999
YLR333C	2210.8	0.009639	0.126905	0.0759544	0.939455	0.99999
YHR103W	1330.42	-0.11808	0.158058	-0.747065	0.455024	0.99999
YHL030W	895.317	0.0853334	0.25716	0.33183	0.740018	0.99999
YGL077C	3330.88	-0.0795832	0.13847	-0.574731	0.565473	0.99999
YPL204W	3025.63	-0.0542881	0.0793031	-0.684564	0.493619	0.99999
YPL251W	1.65579	0.558938	1.02167	0.547085	0.584321	NA
YIL009C-A	256.751	-0.0831717	0.176839	-0.470325	0.638123	NA
YOR091W	858.583	0.0250595	0.130817	0.191561	0.848086	0.99999
YGR026W	1865.22	-0.117332	0.157926	-0.742958	0.457507	0.99999
YAL040C	1596.47	-0.0195595	0.257418	-0.0759833	0.939432	0.99999
YDR288W	444.011	0.0262842	0.145105	0.181139	0.856259	0.99999
YGL208W	572.878	0.00406194	0.278887	0.0145648	0.988379	0.99999
YNL284C	954.961	0.0582342	0.0909055	0.640601	0.521782	0.99999
YIL164C	312.464	-0.0409516	0.179085	-0.228671	0.819125	0.99999
YOL143C	1939.37	0.15457	0.190242	0.812492	0.416509	0.99999
YBR237W	845.033	-0.113886	0.0740732	-1.53747	0.124178	0.99999
YBR197C	345.389	-0.0173123	0.125966	-0.137436	0.890686	0.99999
YHR147C	644.837	0.112558	0.181619	0.619748	0.535423	0.99999
YJL093C	1261.15	-0.0401007	0.0824781	-0.486198	0.626827	0.99999
YPL126W	1700.51	0.00438628	0.386857	0.0113382	0.990954	0.99999
YMR317W	25.2314	-0.186989	0.317587	-0.58878	0.556009	NA
YOR251C	1140.45	0.0979391	0.123621	0.792256	0.428212	0.99999
YPR181C	5230.2	0.0219535	0.0960585	0.228543	0.819224	0.99999
YCL008C	607.894	0.116237	0.162551	0.71508	0.47456	0.99999
YOR107W	883.596	-0.127889	0.365542	-0.34986	0.726444	0.99999
YML005W	310.024	-0.067761	0.140748	-0.481435	0.630207	0.99999
YNL215W	924.963	0.0375648	0.16695	0.225006	0.821974	0.99999
YCR075W-A	197.646	-0.0143856	0.243886	-0.0589851	0.952964	NA
YDL059C	148.499	0.0344279	0.17775	0.193687	0.846421	NA
YOR204W	3243.59	0.059929	0.165875	0.361291	0.717882	0.99999
YEL012W	1203.83	-0.0465455	0.269758	-0.172545	0.863009	0.99999
YBL040C	1537.83	-0.201366	0.127555	-1.57867	0.114413	0.99999
YPR043W	7891.96	0.118839	0.181005	0.656553	0.511469	0.99999
YDR382W	9918.64	0.0940895	0.0732221	1.28499	0.198797	0.99999
YDR483W	6115.25	-0.0157465	0.101896	-0.154536	0.877187	0.99999
YER061C	454.28	0.00534002	0.105103	0.0508074	0.959479	0.99999
YLR022C	385.256	0.00330293	0.144669	0.0228309	0.981785	0.99999
YLR402W	68.0972	-0.00537618	0.234444	-0.0229317	0.981705	NA
YLR073C	108.159	-0.0804396	0.491185	-0.163767	0.869915	NA
YER183C	415.248	0.0404882	0.134316	0.301439	0.76308	0.99999
YHR090C	398.265	0.0606856	0.0879441	0.690047	0.490165	0.99999
YOL021C	1727.17	0.0344797	0.220451	0.156405	0.875713	0.99999
YHR030C	2082.48	-0.0380924	0.13367	-0.284974	0.775664	0.99999
YBR295W	629.602	-0.0781068	0.154312	-0.506161	0.612744	0.99999
YKL018W	355.89	-0.0151771	0.113825	-0.133337	0.893927	0.99999
YIL011W	91.7649	0.12752	0.243289	0.524149	0.600175	NA
YEL034W	7472.14	0.108387	0.153967	0.703965	0.481455	0.99999
YHL015W	11200.6	0.0344079	0.130464	0.263736	0.791984	0.99999
YNR050C	1722.01	0.160706	0.0924207	1.73886	0.0820601	0.99999
YDR134C	2229.18	0.0540889	0.330065	0.163874	0.869831	0.99999
YKL208W	322.883	0.163887	0.192093	0.853165	0.393568	0.99999
YGR004W	300.081	-0.0987757	0.110411	-0.894618	0.370991	0.99999
YML110C	1952.7	0.13925	0.191262	0.728058	0.466578	0.99999
YGL048C	4213.6	0.0542964	0.120205	0.4517	0.651485	0.99999
YGL243W	359.633	-0.0114928	0.172899	-0.0664712	0.947003	0.99999
YKL106W	448.104	-0.00543911	0.141479	-0.0384447	0.969333	0.99999
tN(GUU)N1	10.0048	0.560612	0.667287	0.840137	0.400832	NA
YPR029C	1805.05	-0.108561	0.199726	-0.543551	0.586751	0.99999
YJL034W	26991	0.0873343	0.371079	0.235353	0.813935	0.99999
YFL048C	1632.62	-0.0042611	0.0873464	-0.0487839	0.961092	0.99999
YLR117C	842.859	0.0418804	0.156782	0.267125	0.789373	0.99999
YOR176W	2296.43	-0.136435	0.148885	-0.916383	0.359466	0.99999
YOR109W	1304.74	-0.0488892	0.176674	-0.276719	0.781996	0.99999
YBL089W	493.35	-0.0265612	0.104585	-0.253967	0.799521	0.99999
YDL084W	7056.31	-0.0239187	0.123153	-0.194219	0.846004	0.99999
YGL116W	728.629	0.00267755	0.2274	0.0117746	0.990605	0.99999
YNR034W-A	911.162	-0.361411	0.80631	-0.448228	0.653988	0.99999
YCR024C	345.306	-0.0195038	0.157079	-0.124166	0.901184	0.99999
YIL102C-A	164.724	-0.0834974	0.188358	-0.44329	0.657556	NA
YMR102C	1204	0.163368	0.134166	1.21765	0.223355	0.99999
YCR071C	492.618	0.146343	0.191547	0.764006	0.444864	0.99999
YDR175C	742.761	0.142331	0.128361	1.10883	0.267503	0.99999
YOR189W	423.85	-0.0246609	0.155243	-0.158854	0.873784	0.99999
YOR154W	485.683	-0.140697	0.277988	-0.506125	0.612769	0.99999
YPR121W	540.398	-0.157538	0.125607	-1.25421	0.209765	0.99999
YBR070C	457.368	-0.03879	0.183349	-0.211564	0.832447	0.99999
YOR396C-A	1.27621	-3.86259	3.03955	-1.27078	0.203808	NA
YLL017W	3.80946	-0.367039	0.690946	-0.531213	0.595271	NA
YDR351W	753.389	0.0150196	0.229498	0.0654452	0.947819	0.99999
YNL315C	1192.05	0.155584	0.156178	0.996193	0.319156	0.99999
YPR174C	400.547	0.234624	0.126536	1.85421	0.0637094	0.99999
YJR045C	20436.9	0.397739	0.27143	1.46534	0.142827	0.99999
YMR008C	5787.1	0.0361726	0.104618	0.345757	0.729525	0.99999
YDR349C	1864.98	-0.0230564	0.0784453	-0.293917	0.768821	0.99999
YDL171C	3827.82	-0.0163725	0.173659	-0.0942792	0.924887	0.99999
YKL062W	1077.78	-0.106932	0.144394	-0.740555	0.458963	0.99999
YJR010W	560.582	-0.0612402	0.153764	-0.398273	0.690429	0.99999
YJL218W	37.3277	-0.166468	0.278718	-0.597261	0.550333	NA
YIL126W	1905.86	-0.00430744	0.181581	-0.0237218	0.981075	0.99999
YDR093W	1532.15	0.0196114	0.167759	0.116903	0.906937	0.99999
YMR282C	616.423	-0.0332922	0.14134	-0.235548	0.813784	0.99999
YIL109C	4548.43	-0.0161667	0.116623	-0.138623	0.889748	0.99999
YFL022C	4133.2	0.0436359	0.0741253	0.588678	0.556077	0.99999
YPL109C	512.169	-0.163141	0.131822	-1.23759	0.215868	0.99999
YJL156C	666.868	-0.0534163	0.171038	-0.312307	0.754808	0.99999
YNL071W	5869.26	0.0228507	0.191245	0.119484	0.904892	0.99999
YMR088C	1404	-0.136385	0.122127	-1.11675	0.264102	0.99999
YGR211W	2861.5	0.627866	0.194185	3.23334	0.0012235	0.385647
YKL139W	423.197	0.194074	0.228582	0.849033	0.395863	0.99999
YJL069C	514.257	0.102886	0.570135	0.180458	0.856793	0.99999
YDR323C	216.052	-0.0356006	0.109267	-0.325813	0.744566	NA
YDR344C	15.5742	-0.562918	0.415967	-1.35328	0.175967	NA
YJL016W	863.079	-0.028301	0.147514	-0.191854	0.847857	0.99999
YDR444W	710.145	0.0947485	0.0982968	0.963902	0.335095	0.99999
YPL189W	35.3259	-0.123332	0.280542	-0.43962	0.660212	NA
YLR285W	751.78	0.0211113	0.169927	0.124238	0.901127	0.99999
YLR267W	135.441	-0.241469	0.231588	-1.04267	0.297103	NA
YDL219W	309.752	-0.124276	0.182446	-0.681163	0.495768	0.99999
YNL017C	2.91363	0.0561479	0.909538	0.0617323	0.950776	NA
YCR024C-A	1295.09	0.00161433	0.340611	0.00473951	0.996218	0.99999
YCR024C-B	2455.72	0.129384	0.712761	0.181525	0.855956	0.99999
YKR024C	479.139	0.057415	0.652094	0.0880471	0.929839	0.99999
YBR156C	405.807	-0.00944458	0.121046	-0.0780245	0.937809	0.99999
YOR076C	428.841	-0.108442	0.258782	-0.419049	0.67518	0.99999
YEL059C-A	172.977	0.0181205	0.18854	0.0961098	0.923433	NA
YDR405W	925.242	0.172348	0.187281	0.920264	0.357435	0.99999
YOL091W	69.2465	0.0676867	0.450912	0.150111	0.880677	NA
YCL031C	946.452	0.0408911	0.229601	0.178097	0.858647	0.99999
YIL027C	457.774	0.02301	0.119683	0.192258	0.84754	0.99999
YLR459W	694.862	-0.0707543	0.264813	-0.267186	0.789326	0.99999
YNL243W	3032.55	0.0216517	0.114633	0.188877	0.850189	0.99999
YNR026C	833.805	0.0101966	0.0897085	0.113664	0.909504	0.99999
YHL044W	74.4397	0.00105914	0.218251	0.00485287	0.996128	NA
YPR204W	5824.39	0.025239	0.100847	0.250271	0.802377	0.99999
YNL297C	1165.29	-0.0723527	0.391418	-0.184847	0.853349	0.99999
YBR170C	946.973	0.0738451	0.105639	0.699032	0.484532	0.99999
YGR149W	838.072	-0.213618	0.18535	-1.15251	0.249111	0.99999
YDR458C	1083.94	-0.0341889	0.180264	-0.18966	0.849575	0.99999
YKL193C	1072.33	-0.0804777	0.156286	-0.514937	0.606597	0.99999
YPR099C	11.5972	-0.0404319	0.420731	-0.0960991	0.923442	NA
YOR135C	1.5972	-0.329076	1.10595	-0.297549	0.766047	NA
YLR310C	2088.83	0.0310168	0.27057	0.114635	0.908735	0.99999
YNR008W	675.84	0.0455373	0.0926289	0.49161	0.622995	0.99999
YJR150C	2.54888	0.93668	0.941062	0.995344	0.319569	NA
YBR301W	5.05456	-0.714008	1.01503	-0.703435	0.481785	NA
YLR003C	496.094	-0.0674105	0.340779	-0.197813	0.843192	0.99999
YER113C	788.482	-0.0346112	0.169913	-0.203699	0.838588	0.99999
YHR122W	436.322	0.225647	0.125756	1.79433	0.0727598	0.99999
YHL017W	742.384	-0.115466	0.108301	-1.06616	0.286352	0.99999
YJR010C-A	349.753	0.00512018	0.112097	0.0456763	0.963568	0.99999
YIL085C	1154.63	-0.00132013	0.0649	-0.020341	0.983771	0.99999
YMR190C	568.907	0.0455839	0.147436	0.309178	0.757186	0.99999
YLR325C	5533.17	0.0254925	0.158753	0.16058	0.872424	0.99999
YOR272W	1003.55	0.0863597	0.25058	0.344639	0.730366	0.99999
YOR058C	578.512	-0.134443	0.200526	-0.670453	0.502569	0.99999
YAL064W-B	24.1883	0.164763	0.326076	0.50529	0.613355	NA
YDR413C	2.71355	-0.83332	0.850337	-0.979988	0.327092	NA
YBR203W	562.244	-0.00960111	0.224727	-0.0427234	0.965922	0.99999
YAR029W	18.5587	-0.0305892	0.319475	-0.0957482	0.923721	NA
YNL238W	1522.15	-0.0330989	0.085289	-0.38808	0.697957	0.99999
YJL198W	1486.03	0.0537826	0.162074	0.33184	0.74001	0.99999
YOL135C	265.342	-0.00646065	0.219319	-0.0294577	0.9765	NA
YOR323C	2827.4	0.0672048	0.0676978	0.992718	0.320847	0.99999
YLL041C	3047.89	-0.41144	0.193312	-2.12837	0.0333061	0.99999
YKR074W	1012.82	-0.11071	0.184926	-0.598671	0.549392	0.99999
YMR274C	251.886	-0.0644018	0.141936	-0.453737	0.650018	NA
YER026C	4912.31	0.0465644	0.116667	0.399122	0.689803	0.99999
YMR201C	410.502	0.0549446	0.182277	0.301435	0.763083	0.99999
YLR069C	1528.28	0.177001	0.0930827	1.90155	0.0572304	0.99999
YML042W	292.562	-0.0803069	0.142255	-0.564529	0.572394	0.99999
YMR050C	837.258	-0.436452	0.232623	-1.87622	0.0606254	0.99999
YDR069C	682.498	-0.104015	0.233097	-0.446233	0.655429	0.99999
YOR298W	45.5104	0.0760102	0.459386	0.16546	0.868582	NA
YEL066W	383.733	0.0119535	0.260982	0.045802	0.963468	0.99999
YPR035W	16855.6	0.0467127	0.225147	0.207477	0.835637	0.99999
YDR014W	223.815	-0.0520519	0.37972	-0.13708	0.890968	NA
YDR227W	786.66	0.017404	0.241657	0.0720195	0.942586	0.99999
YPR060C	448.2	-0.155309	0.175137	-0.886787	0.375193	0.99999
YMR037C	1344.3	-0.0508606	0.168999	-0.300953	0.763451	0.99999
YCR038C	287.209	-0.0483834	0.105735	-0.457589	0.647248	0.99999
YNL257C	1118.4	0.000308045	0.220127	0.0013994	0.998883	0.99999
YCR072C	424.151	0.039647	0.602437	0.0658111	0.947528	0.99999
YBR093C	405.811	-0.0121661	0.115266	-0.105548	0.915941	0.99999
YNL092W	215.055	-0.117464	0.22529	-0.521392	0.602093	NA
YGR045C	16.5639	0.100487	0.3457	0.290676	0.7713	NA
YAL037C-B	8.2688	0.126948	0.562564	0.225659	0.821467	NA
YLR134W	522.919	0.0294667	0.111403	0.264505	0.791391	0.99999
YMR203W	3204.52	0.0953118	0.0874426	1.08999	0.275717	0.99999
YKL096C-B	2.35387	0.360699	0.87324	0.413059	0.679564	NA
YPL225W	1885.58	-0.0171483	0.155276	-0.110438	0.912062	0.99999
YPL270W	1507.53	-0.0603613	0.0609573	-0.990222	0.322065	0.99999
YDL012C	787.491	0.114693	0.187753	0.610871	0.541285	0.99999
YDR218C	9.65075	0.707276	0.490166	1.44293	0.14904	NA
YLR299W	1818.7	0.152801	0.156746	0.97483	0.329645	0.99999
YFL003C	47.8719	-0.135148	0.301411	-0.448385	0.653875	NA
YPL051W	312.427	0.0428076	0.125946	0.339888	0.733941	0.99999
YNL054W	1016.75	-0.0836865	0.129125	-0.648103	0.516918	0.99999
YDR156W	449.501	0.101153	0.14455	0.699782	0.484063	0.99999
YPL062W	1.97442	-0.750591	1.22744	-0.61151	0.540862	NA
YPR155C	788.765	-0.100026	0.124342	-0.804439	0.421144	0.99999
YOR137C	714.933	0.0286659	0.169215	0.169405	0.865478	0.99999
YKL123W	121.561	-0.164052	0.169237	-0.969366	0.332363	NA
YKL172W	1544.95	0.152404	0.307113	0.496248	0.61972	0.99999
YNL336W	1395.73	-0.0668955	0.104444	-0.640493	0.521852	0.99999
YDR305C	377.14	-0.0339149	0.123427	-0.274778	0.783487	0.99999
YJL057C	805.309	-0.0858855	0.250255	-0.343192	0.731454	0.99999
YPR100W	898.622	0.172854	0.164254	1.05236	0.292637	0.99999
YDR358W	1054.85	0.0144412	0.287907	0.0501591	0.959996	0.99999
YJL152W	10.2427	-0.0947706	0.508053	-0.186537	0.852024	NA
YLR096W	1078.11	0.0587825	0.187467	0.313562	0.753854	0.99999
YKR052C	368.107	0.0358016	0.15087	0.237302	0.812423	0.99999
YLR427W	1216.25	0.0393293	0.0766449	0.513136	0.607856	0.99999
YDL152W	1.23093	1.17162	1.37391	0.85276	0.393792	NA
YGL015C	6.78286	-0.242206	0.564024	-0.429424	0.667614	NA
YEL064C	352.983	-0.0370471	0.0983304	-0.376761	0.706351	0.99999
YMR127C	230.44	0.0571635	0.271551	0.210508	0.833271	NA
YIL140W	2186.52	-0.0795497	0.113773	-0.699197	0.484429	0.99999
YOL163W	94.8122	-0.0770111	0.224343	-0.343274	0.731392	NA
YLR197W	4094.51	-0.000135145	0.320785	-0.000421295	0.999664	0.99999
YBR213W	160.123	0.202828	0.171857	1.18022	0.237914	NA
YAL064W	5.68989	-1.40244	0.660412	-2.12358	0.033705	NA
YJL204C	412.477	-0.120692	0.353208	-0.341701	0.732576	0.99999
YLR244C	2603.57	0.032518	0.0890698	0.365084	0.715049	0.99999
YJR084W	556.035	0.0262733	0.132827	0.197801	0.8432	0.99999
YLR233C	390.078	-0.0443919	0.222212	-0.199772	0.841659	0.99999
YDL238C	287.417	-0.0440787	0.247017	-0.178444	0.858374	0.99999
YGL084C	1236.48	-0.138338	0.163018	-0.848606	0.3961	0.99999
YLR382C	1025.49	0.0111188	0.0980756	0.11337	0.909737	0.99999
YLR154C-H	4.1357	-0.777075	1.15656	-0.671888	0.501655	NA
YLR154C-G	171.212	-0.052552	0.434782	-0.12087	0.903794	NA
YGR238C	477.829	0.0849015	0.154627	0.549071	0.582956	0.99999
YDR363W	500.371	0.0323835	0.134599	0.240592	0.809871	0.99999
YNL114C	7.17787	0.352768	0.551497	0.639654	0.522397	NA
YNL163C	1163.67	0.0694674	0.194268	0.357585	0.720654	0.99999
snR55	4.49718	-0.302442	0.826719	-0.365834	0.714489	NA
snR54	3.31558	0.196026	1.64608	0.119086	0.905207	NA
snR57	7.44801	0.0742762	0.56593	0.131246	0.895581	NA
YHR009C	1439.35	0.00338594	0.176306	0.0192049	0.984678	0.99999
snR50	5.85731	-0.0843976	0.63517	-0.132874	0.894293	NA
YFR050C	2721.73	0.142183	0.142339	0.998903	0.317842	0.99999
YNR069C	332.975	0.284384	0.356141	0.798517	0.424571	0.99999
YOL058W	1146.81	-0.0409645	0.101766	-0.402537	0.687289	0.99999
YAR019C	412.104	-0.0709141	0.149455	-0.474485	0.635154	0.99999
YOR024W	1.37679	2.09133	1.38614	1.50875	0.131364	NA
YML129C	579.034	0.139913	0.259709	0.53873	0.590073	0.99999
YGL257C	1325.48	-0.0125777	0.1899	-0.0662334	0.947192	0.99999
YGR020C	2481.42	0.0775665	0.141528	0.548064	0.583648	0.99999
YOR093C	712.899	0.0428099	0.261621	0.163634	0.87002	0.99999
YAL046C	315.29	0.0589821	0.244389	0.241345	0.809287	0.99999
YOR392W	3.87863	-0.592081	0.695773	-0.850969	0.394787	NA
YAL039C	954.691	0.327606	0.18529	1.76807	0.0770488	0.99999
YGR100W	1096.03	-0.0342632	0.0780018	-0.439261	0.660472	0.99999
YLR403W	1264.49	0.0827749	0.186272	0.444377	0.65677	0.99999
YOL118C	11.5475	-0.132315	0.403123	-0.328224	0.742742	NA
YDR286C	164.727	0.0197003	0.189669	0.103867	0.917275	NA
YHR141C	7191.74	0.0600214	0.229108	0.261978	0.793338	0.99999
YPL128C	522.624	0.0164217	0.131628	0.124758	0.900715	0.99999
YJL091C	806.296	-0.17051	0.263947	-0.646	0.518279	0.99999
YBR191W	9272.04	0.0743695	0.143486	0.518305	0.604245	0.99999
YDR380W	2187.91	-0.153047	0.146603	-1.04396	0.296506	0.99999
YGR191W	1826.51	-0.0110329	0.136731	-0.0806902	0.935688	0.99999
YGR047C	670.119	0.0676183	0.17775	0.380412	0.70364	0.99999
YDR485C	900.216	-0.0817708	0.0770718	-1.06097	0.288704	0.99999
YPL239W	905.306	0.195488	0.166399	1.17481	0.240069	0.99999
YPR183W	3113.43	0.0822181	0.173518	0.47383	0.635621	0.99999
YOR206W	1866.79	0.066664	0.413912	0.161058	0.872047	0.99999
YEL049W	15.3568	0.268022	0.468759	0.571768	0.567479	NA
YOR391C	10.0266	0.215889	0.82244	0.262498	0.792937	NA
YDR525W-A	258.391	-0.232618	0.164571	-1.41348	0.157515	NA
YBR089W	2.07865	-0.859379	1.04438	-0.822864	0.410585	NA
YLR075W	25892.1	0.0830808	0.18627	0.446023	0.65558	0.99999
YBR054W	234.268	-0.308397	0.652033	-0.472977	0.636229	NA
YLR020C	721.298	0.0118894	0.147107	0.0808212	0.935584	0.99999
YNL217W	1124.98	-0.0689625	0.137364	-0.502042	0.615638	0.99999
YLR404W	239.95	-0.05459	0.192373	-0.283771	0.776586	NA
YIL013C	217.089	0.0548672	0.186287	0.294531	0.768352	NA
YPL206C	1194.95	-0.0534676	0.150287	-0.355771	0.722012	0.99999
YDL060W	1221.29	0.0264933	0.302614	0.0875481	0.930236	0.99999
YBR293W	753.379	-0.041865	0.209932	-0.199422	0.841933	0.99999
YNR052C	1143.9	0.00323509	0.0989104	0.0327073	0.973908	0.99999
YHR032W	1007.97	0.0445841	0.117041	0.380928	0.703256	0.99999
YEL032W	1151.1	-0.0142346	0.183529	-0.0775602	0.938178	0.99999
YOL076W	487.937	-0.0495285	0.388678	-0.127428	0.898602	0.99999
YDR136C	1.21302	0.483121	1.19618	0.403887	0.686296	NA
YHR203C	10742.7	0.0947243	0.127746	0.741503	0.458389	0.99999
YML112W	403.294	0.206704	0.123328	1.67605	0.0937284	0.99999
YLR154W-C	3.06288	-0.0586308	0.875413	-0.066975	0.946602	NA
YGL241W	663.67	-0.0190302	0.229861	-0.0827901	0.934018	0.99999
YDL071C	7.10799	-0.50975	0.693795	-0.734727	0.462506	NA
YPR176C	658.923	-0.0577504	0.158806	-0.363653	0.716117	0.99999
YDR057W	669.757	-0.0881992	0.0932213	-0.946128	0.344083	0.99999
YJL036W	1059.09	0.0506354	0.140933	0.359287	0.71938	0.99999
YER009W	3220.54	0.0347742	0.105613	0.329261	0.741959	0.99999
YLR115W	677.471	0.0700746	0.133078	0.526568	0.598493	0.99999
YLR140W	1.96433	0.283555	0.92468	0.306652	0.759108	NA
YGL114W	1139.29	-0.0357683	0.0827825	-0.432076	0.665686	0.99999
YER167W	962.504	-0.0901833	0.0814793	-1.10682	0.26837	0.99999
YMR104C	1489.07	-0.0990463	0.34192	-0.289677	0.772063	0.99999
YER185W	181.54	0.116191	0.282744	0.410941	0.681116	NA
YDL195W	4982.8	-0.00750179	0.111162	-0.067485	0.946196	0.99999
YNL199C	915.063	0.0422552	0.130398	0.324048	0.745902	0.99999
YCR026C	1243.3	0.0540849	0.0679127	0.79639	0.425806	0.99999
YBL052C	702.376	0.0671883	0.191331	0.351162	0.725467	0.99999
YBR076W	12.3251	-0.146745	0.516293	-0.284228	0.776236	NA
YNL317W	488.722	-0.0994832	0.101284	-0.982225	0.325989	0.99999
YLL019C	1789.1	-0.0807186	0.116544	-0.692599	0.488561	0.99999
YOR156C	367.3	-0.00790427	0.113537	-0.0696184	0.944497	0.99999
YHR052W	1040.35	-0.0137564	0.625436	-0.0219948	0.982452	0.99999
YKR026C	740.043	-0.0686805	0.129319	-0.531094	0.595354	0.99999
YJR043C	443.232	0.0261132	0.224791	0.116167	0.90752	0.99999
YJR012C	262.053	-0.101104	0.181039	-0.558464	0.576527	NA
YKL060C	78822.4	0.0881844	0.216738	0.406871	0.684102	0.99999
YCR044C	800.963	0.0493848	0.118389	0.417139	0.676577	0.99999
YKL035W	8752.35	-0.0849221	0.399589	-0.212523	0.831699	0.99999
YLR264C-A	3.95713	0.39741	0.843167	0.47133	0.637405	NA
YNL073W	2508.44	0.179726	0.138122	1.30121	0.193186	0.99999
YMR280C	725.784	-0.150294	0.173765	-0.864929	0.387078	0.99999
YFL020C	37.6265	-0.0117725	0.28874	-0.0407721	0.967478	NA
YNL328C	47.2196	-0.205847	0.267163	-0.770493	0.441008	NA
YJL014W	3293.9	0.0903291	0.103901	0.869375	0.384642	0.99999
YMR031C	3840.54	0.062076	0.244049	0.254359	0.799218	0.99999
YOR174W	778.859	-0.0909578	0.131993	-0.689109	0.490754	0.99999
YPR149W	3042.81	-0.0577821	0.738696	-0.0782218	0.937652	0.99999
YNL015W	2932.87	-0.201777	0.251252	-0.803086	0.421925	0.99999
YCR084C	3127.04	0.12785	0.0803563	1.59103	0.111602	0.99999
YHR178W	436.958	0.133637	0.162882	0.820453	0.411958	0.99999
YDR260C	340.393	0.194562	0.126335	1.54005	0.123548	0.99999
YLR283W	344.546	-0.0436256	0.126461	-0.344973	0.730115	0.99999
YPL170W	532.77	0.0207958	0.238773	0.0870943	0.930597	0.99999
YPR001W	129.294	-0.0100751	0.148381	-0.0679007	0.945865	NA
YDR204W	686.255	0.0559612	0.25311	0.221094	0.825019	0.99999
YBR085C-A	2448.29	-0.0409184	0.325074	-0.125874	0.899832	0.99999
YDR251W	2900.13	-0.123653	0.134606	-0.918628	0.35829	0.99999
YNL048W	986.287	-0.071675	0.163066	-0.439546	0.660266	0.99999
YML057C-A	3.6763	-0.0265921	0.789181	-0.0336958	0.97312	NA
YOR074C	640.61	0.071325	0.112386	0.63464	0.525663	0.99999
YPL028W	5712.96	-0.0484206	0.147817	-0.327571	0.743236	0.99999
YJR152W	432.562	-0.0791335	0.102369	-0.773018	0.439512	0.99999
YKL025C	1098.93	-0.0323439	0.174469	-0.185384	0.852928	0.99999
YAR008W	270.666	0.0586964	0.270937	0.216643	0.828487	NA
YOR003W	253.664	-0.0427012	0.154812	-0.275826	0.782681	NA
YOL097C	2425.25	0.0357955	0.0677225	0.528561	0.59711	0.99999
YOR110W	682.847	0.0771108	0.076397	1.00934	0.31281	0.99999
YDR407C	1117.99	-0.0731694	0.261537	-0.279767	0.779656	0.99999
YNR020C	352.987	0.152985	0.164917	0.927648	0.35359	0.99999
YBR258C	119.884	-0.116698	0.182605	-0.639074	0.522775	NA
YNL146W	20.604	0.147327	0.592785	0.248534	0.803722	NA
YFR019W	1003.81	-0.0491224	0.228734	-0.214757	0.829957	0.99999
YLR262C-A	1704.48	0.0631537	0.245781	0.256951	0.797216	0.99999
YBR223C	402.041	-0.0208427	0.104124	-0.200173	0.841345	0.99999
YNL241C	4555.01	0.149214	0.239145	0.623949	0.532661	0.99999
YJL154C	1808.7	-0.032692	0.183152	-0.178496	0.858333	0.99999
YDR091C	1923.8	-0.0235375	0.279824	-0.0841156	0.932965	0.99999
YJL123C	2287.32	0.0328246	0.143576	0.228621	0.819164	0.99999
YHR066W	536.989	-0.0181476	0.734273	-0.0247151	0.980282	0.99999
YPL047W	252.593	0.0505376	0.135096	0.374086	0.70834	NA
YER086W	3610.16	0.0396122	0.136291	0.290645	0.771323	0.99999
YLR287C-A	6702.08	0.0358802	0.131371	0.273122	0.78476	0.99999
RPR1	30.3961	-0.0901375	0.629557	-0.143176	0.886151	NA
YBR176W	334.754	0.0242585	0.137637	0.176249	0.860098	0.99999
YDR207C	821.227	0.117271	0.167564	0.699858	0.484016	0.99999
YKL125W	501.797	-0.0593246	0.248037	-0.239177	0.810969	0.99999
YDR373W	788.505	-0.0408325	0.11808	-0.345805	0.729489	0.99999
YGL238W	1553.54	-0.0144169	0.362623	-0.0397574	0.968287	0.99999
YLR190W	1650.31	0.0120894	0.0773432	0.156308	0.87579	0.99999
YNL128W	73.4533	0.137673	0.183473	0.750376	0.453028	NA
YLR312C	457.91	-0.0192344	0.365458	-0.052631	0.958026	0.99999
YKL191W	898.776	0.108134	0.123113	0.878338	0.37976	0.99999
YNR006W	1571.81	0.030486	0.100489	0.303376	0.761604	0.99999
YHR120W	439.578	0.0324767	0.26418	0.122934	0.902159	0.99999
YAR050W	183.459	-0.115236	0.174755	-0.659413	0.50963	NA
YOL137W	502.428	-0.00159193	0.159827	-0.00996028	0.992053	0.99999
YDR530C	948.326	-0.0402807	0.172109	-0.234042	0.814952	0.99999
YER111C	332.939	-0.028186	0.282491	-0.0997769	0.920521	0.99999
YER144C	1617.58	0.0673156	0.144546	0.465703	0.641428	0.99999
YOL039W	5564.98	0.117533	0.151509	0.77575	0.437896	0.99999
YIL083C	814.369	0.00688733	0.117074	0.0588289	0.953088	0.99999
YHL011C	2189.36	0.00767264	0.143228	0.0535696	0.957278	0.99999
YGR184C	1587.4	0.0376814	0.25434	0.148154	0.882221	0.99999
YMR303C	669.319	0.224604	0.208468	1.0774	0.281302	0.99999
YDR307W	689.004	-0.0354498	0.184907	-0.191717	0.847964	0.99999
YDR411C	2070.92	-0.139108	0.243859	-0.570443	0.568377	0.99999
YBR205W	1571.66	-0.0400019	0.0791853	-0.505168	0.613441	0.99999
YOR321W	1310.12	-0.103272	0.149522	-0.69068	0.489766	0.99999
YMR186W	31585.9	0.521153	0.221516	2.35267	0.0186393	0.99999
YMR278W	764.322	-0.0886257	0.205275	-0.431742	0.665929	0.99999
YLR136C	1121.6	0.218612	0.22684	0.963726	0.335183	0.99999
YMR207C	611.709	-0.0170298	0.23457	-0.0726	0.942124	0.99999
YML015C	598.528	0.0670246	0.0795159	0.842909	0.399279	0.99999
YOR197W	3422.02	0.0550603	0.0993205	0.55437	0.579326	0.99999
YKR089C	2197.99	-0.0420456	0.139581	-0.301227	0.763241	0.99999
YKR072C	1106.96	0.00997192	0.156288	0.0638046	0.949126	0.99999
YDL014W	5475.4	0.163318	0.226903	0.719771	0.471666	0.99999
YJL127W-A	1.24066	1.17453	1.3375	0.878151	0.379862	NA
YER079W	638.414	0.00910162	0.342953	0.026539	0.978827	0.99999
YER024W	618.925	-0.0634003	0.103199	-0.614352	0.538982	0.99999
YOR230W	6168.14	0.0987111	0.273131	0.361406	0.717796	0.99999
YGR234W	3755.44	-0.0303974	0.173892	-0.174806	0.861232	0.99999
YMR178W	920.628	-0.0597894	0.0853547	-0.700482	0.483627	0.99999
YPR037C	996.886	0.107254	0.20105	0.533466	0.593711	0.99999
YEL068C	193.643	0.130817	0.137195	0.953513	0.34033	NA
YNL090W	626.852	-0.0396406	0.130133	-0.304617	0.760658	0.99999
YOR307C	635.965	-0.00363666	0.11972	-0.0303764	0.975767	0.99999
YMR225C	591.065	0.0972888	0.156912	0.620021	0.535244	0.99999
YBR095C	696.711	-0.0574835	0.111629	-0.51495	0.606588	0.99999
YDR036C	984.379	0.165287	0.0874756	1.88952	0.0588227	0.99999
YGR043C	717.3	-0.403575	0.21859	-1.84626	0.0648539	0.99999
YPL223C	100.061	-0.147503	0.233994	-0.63037	0.528452	NA
YPL272C	231.643	-0.334777	0.296107	-1.1306	0.258225	NA
YPR002C-A	57.9348	-0.0630522	0.42367	-0.148824	0.881693	NA
YOL002C	1113.79	-0.0923797	0.277414	-0.333004	0.739132	0.99999
YFL005W	1949.71	0.0130649	0.109743	0.11905	0.905236	0.99999
YCR010C	23.956	0.151894	0.278549	0.545304	0.585544	NA
YMR152W	1196.67	-0.00460315	0.0848381	-0.0542581	0.95673	0.99999
YDR154C	8258.65	0.393138	0.253284	1.55216	0.120624	0.99999
YMR125W	1783.4	-0.0306306	0.355978	-0.0860463	0.93143	0.99999
YJR031C	591.672	0.0888946	0.310653	0.286154	0.77476	0.99999
YCL026C-A	69.6019	-1.22096	0.390371	-3.12769	0.00176186	NA
YCL026C-B	421.167	0.244281	0.172632	1.41504	0.157057	0.99999
YGR118W	6664.27	0.103933	0.195283	0.532214	0.594577	0.99999
YJL055W	2481.82	0.0736962	0.190485	0.386888	0.698839	0.99999
YPR102C	7973.89	0.0875404	0.158648	0.55179	0.581092	0.99999
YNL334C	212.995	0.271124	0.178682	1.51735	0.129178	NA
YGL123W	24404	0.0605148	0.135965	0.445076	0.656265	0.99999
YPL064C	577.761	-0.0413125	0.129799	-0.318279	0.750273	0.99999
YPL086C	948.383	0.0446667	0.198927	0.224538	0.822339	0.99999
Q0250	1.42844	0.882908	1.17779	0.74963	0.453477	NA
YPR153W	105.841	0.117366	0.181771	0.645677	0.518489	NA
YMR042W	175.228	0.0616333	0.158095	0.389849	0.696648	NA
YLL003W	662.443	-0.0768754	0.206683	-0.371948	0.709932	0.99999
YER042W	405.483	0.117442	0.122599	0.957935	0.338096	0.99999
YDR109C	535.608	-0.00614039	0.0897036	-0.0684521	0.945426	0.99999
YDR221W	881.061	0.101733	0.0901943	1.12793	0.259348	0.99999
YLR109W	6203.24	0.468689	0.256774	1.8253	0.0679558	0.99999
YKR009C	570.938	-0.24592	0.128774	-1.9097	0.0561718	0.99999
YMR078C	588.916	-0.0290385	0.165437	-0.175525	0.860667	0.99999
YLR094C	813.991	-0.0300463	0.117708	-0.255261	0.798521	0.99999
YBR037C	551.229	0.214864	0.260833	0.82376	0.410076	0.99999
YLR041W	22.01	0.26455	0.391068	0.67648	0.498736	NA
YJR060W	700.607	0.0603649	0.191105	0.315873	0.752099	0.99999
YNL161W	1334.23	-0.0774336	0.0795729	-0.973115	0.330496	0.99999
YIL146C	455.231	0.0126914	0.0999181	0.127018	0.898927	0.99999
YLR195C	1086.03	0.0191863	0.119765	0.1602	0.872723	0.99999
YLR231C	841.505	-0.170734	0.126348	-1.3513	0.1766	0.99999
YKL016C	4593.66	-0.34099	0.133781	-2.54887	0.0108073	0.99999
YPL111W	4695.64	-0.0245215	0.201502	-0.121693	0.903142	0.99999
YKL174C	1401.16	-0.0466232	0.181284	-0.257183	0.797038	0.99999
YKL121W	680.65	-0.0924808	0.123471	-0.749005	0.453854	0.99999
YLR380W	1390.09	0.0775023	0.0898062	0.862995	0.38814	0.99999
YOR142W-B	3039.57	-0.0956034	0.229555	-0.416472	0.677065	0.99999
YMR012W	3566.58	-0.048451	0.272778	-0.177621	0.859021	0.99999
YER093C	619.599	-0.00148038	0.266369	-0.00555765	0.995566	0.99999
YOR032W-A	7.96103	0.101111	0.562645	0.179707	0.857382	NA
YDL201W	668.33	0.120987	0.236665	0.511219	0.609198	0.99999
YDR468C	671.961	0.0103769	0.140305	0.0739595	0.941043	0.99999
snR72	1.97902	0.605388	0.999092	0.605938	0.544556	NA
snR70	25.7817	-0.433002	0.274145	-1.57946	0.11423	NA
snR77	6.52942	-0.275721	1.05413	-0.261563	0.793658	NA
snR76	28.0003	0.00544939	0.27359	0.0199181	0.984109	NA
snR75	2.83859	1.02556	0.874819	1.17231	0.241073	NA
snR74	1.19934	-0.654602	1.66826	-0.392387	0.694772	NA
YFR003C	662.685	0.0854149	0.262597	0.32527	0.744977	0.99999
YIL033C	3391.98	-0.0283014	0.252184	-0.112225	0.910645	0.99999
YOR368W	280.285	-0.0482573	0.113715	-0.42437	0.671296	0.99999
YGR128C	930.705	-0.0222005	0.596289	-0.037231	0.970301	0.99999
YIL048W	1348.62	-0.141113	0.272659	-0.517544	0.604777	0.99999
YIL142C-A	1.75835	-0.956933	0.979725	-0.976736	0.3287	NA
YLR337C	1724.53	-0.0132271	0.140108	-0.0944064	0.924786	0.99999
YOL056W	471.195	0.111807	0.168789	0.662409	0.507709	0.99999
YFR052W	1867.23	0.0732363	0.0893207	0.819926	0.412258	0.99999
YGR088W	900.689	-0.391955	0.383879	-1.02104	0.307236	0.99999
YGL073W	1383.28	0.115094	0.120351	0.956319	0.338911	0.99999
YGL259W	24.457	-0.336015	0.351956	-0.954705	0.339727	NA
YGR106C	2702.64	-0.0132028	0.226907	-0.0581858	0.953601	0.99999
YIL168W	98.6651	0.00229314	0.166906	0.0137391	0.989038	NA
YGL086W	714.483	-0.0288806	0.299413	-0.0964573	0.923157	0.99999
YAL044C	1227.71	0.0313936	0.197953	0.158591	0.873991	0.99999
YPR081C	771.928	0.039532	0.152686	0.25891	0.795705	0.99999
YDR284C	1054.76	0.0362386	0.108279	0.334679	0.737867	0.99999
YJL097W	851.331	-0.202193	0.104323	-1.93815	0.0526053	0.99999
YOR121C	18.3028	0.215091	0.670616	0.320737	0.74841	NA
YOR048C	1700.09	0.0455715	0.196547	0.231861	0.816646	0.99999
YHR143W	3451.44	0.0932074	0.162753	0.572693	0.566853	0.99999
YMR315W-A	5.91954	-1.19374	0.602742	-1.98052	0.0476453	NA
YLR157W-E	24.4582	0.0644143	0.389376	0.16543	0.868606	NA
YLR157W-D	52.3053	0.197643	0.20397	0.968982	0.332554	NA
YCL004W	412.984	-0.0175428	0.130298	-0.134635	0.8929	0.99999
YPL042C	588.562	-0.0844565	0.129929	-0.65002	0.515679	0.99999
YBL044W	3.67691	-0.0298142	0.883575	-0.0337427	0.973082	NA
YDR430C	900.322	0.145334	0.144113	1.00848	0.313225	0.99999
YGL102C	5.80051	0.628643	0.677373	0.928061	0.353376	NA
YDR487C	1879.33	0.10342	0.117877	0.877355	0.380294	0.99999
YPR185W	916.55	-0.122654	0.138021	-0.888657	0.374187	0.99999
YER065C	976.588	-0.0435225	0.136564	-0.318696	0.749957	0.99999
YLR077W	822.434	0.0533082	0.104651	0.509388	0.61048	0.99999
YBR056W	3086.67	-0.0460948	0.189879	-0.242759	0.808192	0.99999
YLL020C	226.59	-0.00598331	0.185541	-0.0322479	0.974274	NA
YHR034C	325.118	0.0202615	0.185514	0.109218	0.91303	0.99999
YBL019W	383.847	-0.0675345	0.106792	-0.632391	0.527132	0.99999
YOL070C	962.235	0.0338258	0.201196	0.168123	0.866486	0.99999
YJL085W	485.106	-0.0863797	0.170535	-0.506523	0.61249	0.99999
YPL200W	4.53247	0.372736	0.678382	0.549449	0.582698	NA
YNR054C	415.324	0.12074	0.279054	0.432675	0.665251	0.99999
YDR130C	361.311	0.0872368	0.19937	0.437563	0.661703	0.99999
YIL015W	2477.31	-0.327539	0.292361	-1.12032	0.262576	0.99999
YEL030W	222.251	0.036842	0.13963	0.263856	0.791891	NA
YBR291C	237.751	0.130095	0.194301	0.669553	0.503143	NA
YML114C	766.745	0.0240402	0.099963	0.240491	0.80995	0.99999
YCR108C	3.98045	-0.627676	0.752386	-0.834248	0.404141	NA
YHR201C	1143.95	0.00591571	0.0687452	0.0860527	0.931425	0.99999
YNL299W	350.754	0.0786434	0.378781	0.207622	0.835524	0.99999
YGR008C	3830.06	-0.0886369	0.577935	-0.153368	0.878108	0.99999
YNL311C	532.785	-0.129382	0.317261	-0.407809	0.683414	0.99999
YPR170C	1.29605	0.719781	1.42733	0.504286	0.61406	NA
YJL030W	377.5	0.0256886	0.198423	0.129464	0.896991	0.99999
YGR248W	490.779	-0.414328	1.09785	-0.377401	0.705876	0.99999
YBR074W	916.498	0.0127738	0.180404	0.0708067	0.943552	0.99999
YOR150W	758.568	0.0505377	0.127938	0.395018	0.69283	0.99999
YML036W	202.384	-0.240609	0.166848	-1.44208	0.14928	NA
YDL236W	1837.14	-0.0169098	0.0917614	-0.18428	0.853794	0.99999
YDL088C	941.405	-0.0366787	0.0873098	-0.420099	0.674413	0.99999
YLR113W	3821.92	0.0251681	0.141968	0.17728	0.859289	0.99999
YLR142W	2930.19	0.0914032	0.246786	0.370374	0.711104	0.99999
YLL058W	644.655	-0.037887	0.107892	-0.351158	0.72547	0.99999
YDL197C	815.863	0.0752401	0.23492	0.32028	0.748756	0.99999
YER130C	1100.76	-0.0423461	0.151731	-0.279087	0.780178	0.99999
YER165W	10520.2	0.126448	0.128331	0.985325	0.324464	0.99999
YMR106C	245.882	-0.139947	0.127858	-1.09456	0.273711	NA
YER187W	73.8367	0.23565	0.242287	0.972608	0.330748	NA
YGL112C	1584.19	-0.0575631	0.097103	-0.592804	0.553312	0.99999
YMR244W	17.1677	0.0979244	0.347719	0.281619	0.778235	NA
YDL008W	349.949	0.18903	0.229406	0.823997	0.409941	0.99999
YBL050W	2122.85	-0.0262764	0.166666	-0.157658	0.874726	0.99999
YJR086W	394.98	-0.0765664	0.275586	-0.277831	0.781142	0.99999
YJR014W	1758.12	0.0916191	0.104619	0.875737	0.381173	0.99999
YHR050W	2094.56	0.0385134	0.0956243	0.402758	0.687126	0.99999
YPL018W	189.979	-0.217015	0.148105	-1.46528	0.142846	NA
YPL185W	15.2349	-0.689723	0.384187	-1.79528	0.072609	NA
YJR041C	736.005	-0.117472	0.741396	-0.158447	0.874104	0.99999
YDL248W	593.442	-0.0650163	0.147636	-0.440384	0.659659	0.99999
YKR028W	1664.67	0.00591591	0.152873	0.0386981	0.969131	0.99999
YKL037W	3.86343	0.339297	0.702068	0.483282	0.628896	NA
YMR286W	413.814	0.212628	0.189267	1.12343	0.261256	0.99999
YDL175C	402.361	-0.0232604	0.111073	-0.209415	0.834125	0.99999
YKL168C	579.098	-0.04798	0.155353	-0.308844	0.75744	0.99999
YFL026W	3349.98	-0.291789	0.199303	-1.46405	0.143181	0.99999
YDL102W	608.969	-0.00520597	0.257401	-0.0202251	0.983864	0.99999
YGL029W	391.876	0.15951	0.404243	0.39459	0.693145	0.99999
YDL128W	2888.27	-0.0215852	0.0825623	-0.261442	0.793752	0.99999
YPL098C	624.404	0.137075	0.193723	0.707582	0.479205	0.99999
YMR033W	1211.13	0.0312787	0.290458	0.107688	0.914243	0.99999
YPR003C	543.043	0.0362592	0.119495	0.303436	0.761557	0.99999
YGR262C	766.014	0.0802578	0.117663	0.682098	0.495177	0.99999
YDR202C	652.989	-0.115031	0.213169	-0.539623	0.589457	0.99999
YGR215W	488.609	0.210677	0.149279	1.4113	0.158156	0.99999
YDR253C	50.6673	0.0182241	0.229295	0.0794791	0.936652	NA
YCR082W	1040.18	0.0590431	0.113606	0.519718	0.60326	0.99999
YOR001W	1510.96	0.00730162	0.197474	0.0369751	0.970505	0.99999
YKL088W	920.396	-0.0290504	0.0654697	-0.443723	0.657243	0.99999
YEL075W-A	18.5967	-0.0885052	0.485179	-0.182418	0.855255	NA
YLR276C	1428.09	0.0822995	0.334011	0.246398	0.805374	0.99999
YDL222C	406.174	-0.227665	0.401592	-0.566906	0.570778	0.99999
YNL140C	144.177	-0.0228907	0.234382	-0.0976639	0.922199	NA
YOL095C	238.287	-0.0686481	0.207064	-0.331531	0.740243	NA
YNR022C	616.313	0.0622813	0.136799	0.455276	0.648911	0.99999
YDR409W	510.251	0.0530272	0.148991	0.355909	0.721909	0.99999
YBR221C	6571.06	0.0333756	0.0971451	0.343565	0.731174	0.99999
YEL018C-A	4.87834	-0.639232	0.675397	-0.946454	0.343917	NA
YAL005C	40540.1	1.11391	0.689389	1.61579	0.10614	0.99999
YPL158C	581.518	-0.0507682	0.107467	-0.472407	0.636637	0.99999
tG(GCC)P2	11.3684	0.486269	0.513068	0.947768	0.343248	NA
YJL121C	1713.12	0.0808442	0.147639	0.547579	0.583981	0.99999
YKL008C	864.408	-0.00132746	0.199493	-0.00665417	0.994691	0.99999
YER158W-A	3.53468	0.0743223	0.696243	0.106748	0.914989	NA
YBR103W	759.154	0.0255986	0.139882	0.183002	0.854797	0.99999
YNR004W	74.2242	0.0289249	0.244234	0.118431	0.905726	NA
YPL032C	1498.73	-0.0505958	0.250991	-0.201584	0.840242	0.99999
YHR064C	6289.46	0.0802222	0.0690776	1.16133	0.245506	0.99999
YKL197C	642.484	-0.062991	0.107572	-0.585571	0.558164	0.99999
YMR020W	969.675	-0.0277074	0.0902799	-0.306905	0.758915	0.99999
YDR206W	1436.42	-0.0235269	0.252883	-0.0930348	0.925876	0.99999
YDR377W	2126.31	-0.398508	0.126577	-3.14835	0.00164195	0.431053
YIR007W	405.526	-0.0767401	0.102587	-0.748048	0.454431	0.99999
YPL045W	580.978	-0.0695085	0.155051	-0.448295	0.65394	0.99999
YLR314C	2746.27	-0.0236593	0.139618	-0.169457	0.865437	0.99999
YFR020W	263.754	0.0822127	0.129818	0.63329	0.526544	NA
YNL126W	358.881	0.114869	0.359674	0.31937	0.749446	0.99999
YOR327C	1268.21	0.0546817	0.164555	0.3323	0.739663	0.99999
YOL139C	4638.14	0.0681616	0.0945578	0.720846	0.471004	0.99999
YBR207W	1909.04	0.113168	0.0850725	1.33026	0.183433	0.99999
YNL269W	4.11593	1.25	0.794723	1.57288	0.115747	NA
YDR532C	346.281	-0.0245393	0.154898	-0.158423	0.874124	0.99999
YKL210W	6125.98	0.150193	0.0803873	1.86837	0.0617111	0.99999
YER146W	596.143	0.114214	0.249784	0.457251	0.647491	0.99999
YHR159W	335.322	-0.0895691	0.1907	-0.469686	0.638579	0.99999
YPL132W	407.986	-0.0119622	0.150442	-0.0795132	0.936624	0.99999
YIL114C	331.329	0.0801944	0.109488	0.732449	0.463894	0.99999
YJL089W	25.3472	-0.348301	0.48759	-0.714331	0.475022	NA
YMR301C	938.976	-0.059715	0.118526	-0.503814	0.614392	0.99999
YJL217W	396.163	0.0373983	0.254233	0.147103	0.883051	0.99999
YBL029W	42.1353	0.181397	0.446751	0.406036	0.684716	NA
YMR188C	583.676	0.174238	0.115522	1.50827	0.131486	0.99999
YGR154C	219.463	-0.182471	0.10858	-1.68052	0.092857	NA
snR191	6.9228	-0.349697	0.607979	-0.57518	0.56517	NA
snR190	3.02544	0.0388884	0.758695	0.051257	0.959121	NA
YOR389W	445.09	0.0908154	0.106541	0.852398	0.393993	0.99999
YLR130C	2252.21	-0.100079	0.0735158	-1.36133	0.17341	0.99999
YER022W	605.154	-0.0379952	0.154617	-0.245737	0.805886	0.99999
YBR140C	1187.8	-0.0557704	0.290352	-0.192078	0.847681	0.99999
YKR070W	841.248	0.0293483	0.137586	0.213309	0.831086	0.99999
YGL262W	5.06942	-0.710231	0.635376	-1.11781	0.263647	NA
YMR205C	8868.68	0.0465344	0.0933027	0.498746	0.617958	0.99999
YNL203C	77.4708	0.0445679	0.181207	0.245951	0.80572	NA
YJL185C	230.214	-0.0346719	0.26586	-0.130414	0.896239	NA
YNL022C	584.474	0.0347643	0.217421	0.159894	0.872964	0.99999
YML017W	651.123	-0.060465	0.147009	-0.4113	0.680852	0.99999
[truncated: 4,329 more rows]

## Sheet: deseq.ripev.4h
	baseMean	log2FoldChange	lfcSE	stat	pvalue	padj
YAL008W	510.105	-0.0311432	0.134968	-0.230745	0.817513	NA
YBR255W	583.349	0.0142534	0.0802214	0.177676	0.858978	NA
YGR164W	3.0301	-0.623379	0.837107	-0.744682	0.456464	NA
YGR131W	39.0846	-0.0205968	0.328664	-0.0626682	0.950031	NA
YNL003C	694.211	-0.0845595	0.154401	-0.547663	0.583924	NA
YBR135W	496.586	-0.204537	0.145936	-1.40156	0.161047	NA
YBR160W	829.28	-0.0890252	0.0980447	-0.908006	0.363875	NA
YJL082W	960.218	0.0519775	0.146184	0.355563	0.722168	NA
YJL142C	194.615	-0.172209	0.289479	-0.594894	0.551914	NA
YPL191C	205.794	-0.00605894	0.222391	-0.0272445	0.978265	NA
YGL215W	2680.78	0.182978	0.204081	0.896596	0.369935	0.998968
YKL074C	840.213	-0.104932	0.149683	-0.701029	0.483285	NA
YJL077C	15.9272	-0.858735	0.422668	-2.0317	0.0421836	NA
YKL096W-A	56646.7	-0.198405	0.110733	-1.79174	0.0731747	0.998968
YIL124W	1610.2	-0.123704	0.178409	-0.693372	0.488076	0.998968
YPL039W	371.636	0.0803154	0.0928112	0.865363	0.386839	NA
YNL170W	28.9186	-0.281006	0.466017	-0.602996	0.546511	NA
YGL141W	612.42	0.147905	0.161339	0.916733	0.359282	NA
YJL179W	315.722	0.117748	0.143461	0.820767	0.411779	NA
YDR316W-B	679.062	1.29652	0.913668	1.41902	0.155892	NA
YKL083W	11.7381	-0.989811	0.750377	-1.31908	0.187141	NA
YBR152W	246.585	-0.0585675	0.121264	-0.482974	0.629114	NA
YKL029C	1872.66	0.129817	0.264008	0.491715	0.622921	0.998968
YPL166W	170.958	0.208317	0.315036	0.661247	0.508454	NA
YKL052C	541.872	0.0018268	0.127998	0.0142721	0.988613	NA
YHR025W	3428.59	-0.16393	0.121641	-1.34766	0.177769	0.998968
YOL034W	639.306	0.152988	0.159752	0.957661	0.338234	NA
YBL008W	519.605	0.0112866	0.152175	0.0741684	0.940876	NA
YIL062C	1640.98	-0.178975	0.182382	-0.981321	0.326435	0.998968
YOL116W	448.206	-0.13506	0.13531	-0.998151	0.318206	NA
YDR196C	737.609	-0.0606689	0.164954	-0.367793	0.713027	NA
YNL255C	3855.31	-0.0196962	0.138677	-0.14203	0.887056	0.998968
YNR032W	627.892	-0.298645	0.164517	-1.81528	0.0694805	NA
YNR045W	649.004	-0.15886	0.111221	-1.42833	0.153197	NA
YML105C	1203.6	-0.0884009	0.103146	-0.85705	0.391417	0.998968
YNL288W	738.264	-0.102767	0.122874	-0.836358	0.402954	NA
YIL059C	144.731	-0.0410883	0.173125	-0.237333	0.812399	NA
YIL004C	441.737	0.0724557	0.179328	0.40404	0.686183	NA
YNR018W	2619.04	-0.330466	0.168215	-1.96454	0.0494675	0.883794
YPL144W	260.681	0.0819102	0.14533	0.563614	0.573017	NA
YFR047C	1151.97	-0.0934546	0.14284	-0.65426	0.512944	0.998968
YER087C-B	1087.8	-0.111288	0.0937583	-1.18697	0.235239	0.998968
YHR078W	735.817	0.0683576	0.151266	0.451905	0.651338	NA
YIR023C-A	1.99339	-0.791123	1.01945	-0.776027	0.437733	NA
YJR115W	90.6811	-0.327415	0.19463	-1.68224	0.0925222	NA
YLR355C	12627	0.15048	0.269244	0.558898	0.576231	0.998968
YGR099W	507.258	-0.000735376	0.112891	-0.00651402	0.994803	NA
YLR300W	8542.08	0.123679	0.232944	0.53094	0.59546	0.998968
YCL028W	1950.6	-0.0821509	0.111443	-0.737155	0.461028	0.998968
YJR140C	654.141	0.243908	0.225102	1.08355	0.278566	NA
YOR033C	577.316	0.0927456	0.0883657	1.04957	0.293918	NA
YOR062C	109.458	-0.0290329	0.158197	-0.183523	0.854388	NA
YBR043C	1270.64	0.141708	0.0893641	1.58573	0.1128	0.998968
YHR112C	518.854	-0.0838184	0.138253	-0.606266	0.544338	NA
YLR011W	194.764	-0.0949669	0.178981	-0.530599	0.595697	NA
YIL044C	798.788	-0.120779	0.0836202	-1.44438	0.148633	NA
YNL197C	1748.71	0.130049	0.106508	1.22103	0.222074	0.998968
YKR103W	230.63	0.112501	0.265867	0.423146	0.672188	NA
YLR133W	1406.12	0.0360386	0.0645155	0.558604	0.576432	0.998968
YER121W	48.7513	0.177356	0.334105	0.530838	0.595531	NA
YCR046C	695.672	0.00285118	0.158152	0.0180281	0.985616	NA
YNL144C	1412.85	0.000663362	0.123744	0.00536077	0.995723	0.998968
YKL204W	1274.97	-0.00305964	0.0818852	-0.037365	0.970194	0.998968
YOR266W	471.422	0.0864115	0.0821502	1.05187	0.292858	NA
YDR393W	393.348	-0.0362243	0.0985863	-0.367437	0.713293	NA
YGL171W	1142.95	0.0718542	0.26476	0.271394	0.786088	0.998968
YPR194C	5068.95	0.284627	0.119936	2.37316	0.0176365	0.423193
YGR019W	1198.62	-0.0643394	0.203495	-0.316173	0.751871	0.998968
YBL033C	1091.37	-0.205687	0.151737	-1.35554	0.175245	0.998968
tE(UUC)G3	2.932	-1.17545	0.981982	-1.19701	0.231301	NA
YJL188C	30.1671	-1.01587	0.523545	-1.94036	0.0523358	NA
YLL057C	86.51	-0.0509646	0.177794	-0.28665	0.774381	NA
YPL060C-A	7.92643	0.227671	0.731417	0.311274	0.755592	NA
YBR296C	113.667	-0.0488434	0.202425	-0.241292	0.809329	NA
YNL277W	80.2275	-0.556859	0.419007	-1.329	0.183849	NA
YMR040W	200.478	-0.213568	0.311659	-0.685261	0.49318	NA
YDR077W	35125	-0.132946	0.192138	-0.69193	0.488981	0.998968
YMR266W	4139.54	0.056542	0.0919373	0.615006	0.538551	0.998968
YKR064W	674.083	0.224848	0.236124	0.952248	0.340971	NA
YPL089C	993.085	0.0432778	0.107877	0.401178	0.688289	0.998968
YGR277C	494.271	-0.0646326	0.133003	-0.485948	0.627004	NA
YDL139C	115.54	-0.0376822	0.145422	-0.259122	0.795541	NA
YDR246W	560.558	-0.102125	0.142716	-0.715578	0.474252	NA
YOR288C	864.597	-0.138073	0.192823	-0.716058	0.473956	NA
YCR028C	754.338	-0.00779213	0.120233	-0.0648088	0.948326	NA
YML054C	489.438	-0.280995	0.30299	-0.927405	0.353716	NA
YLR179C	2560.08	-0.0820174	0.132962	-0.616847	0.537336	0.998968
YOR141C	1152.94	0.0234495	0.117176	0.200122	0.841385	0.998968
YPL280W	27.6943	-0.0501051	1.09871	-0.0456036	0.963626	NA
YBL106C	553.294	0.118538	0.164146	0.722148	0.470203	NA
YGL044C	519.847	-0.0964809	0.124003	-0.778052	0.436538	NA
YER107C	816.527	-0.106164	0.128439	-0.826569	0.408481	NA
YBR038W	1581.94	0.0785594	0.108006	0.72736	0.467006	0.998968
YER076W-A	4.27037	-0.736031	0.782012	-0.941202	0.346601	NA
YGR259C	11.1214	0.0319753	0.476788	0.0670639	0.946531	NA
YEL047C	1116.3	-0.0639017	0.109667	-0.582686	0.560104	0.998968
YPR016C	2682.35	0.0058854	0.169464	0.0347294	0.972296	0.998968
YOR208W	607.825	0.140518	0.197542	0.711333	0.476878	NA
YDL055C	30381.3	-0.0336938	0.136215	-0.247357	0.804632	0.998968
YML009C	477.547	0.191478	0.0850387	2.25166	0.0243436	NA
YML072C	4045.72	0.10153	0.0864162	1.17489	0.240038	0.998968
YDR142C	488.532	-0.103501	0.0914235	-1.13211	0.257589	NA
YFL044C	685.124	0.0195458	0.126277	0.154785	0.876991	NA
RDN37-2	3.8188	-2.17562	3.17108	-0.686082	0.492661	NA
YEL011W	3648.84	-0.275164	0.674227	-0.408117	NA	NA
YKL019W	1200.05	-0.136434	0.123604	-1.10381	0.269677	0.998968
YJL130C	11417.9	0.17886	0.187444	0.954205	0.33998	0.998968
YBL085W	2081.57	-0.0252315	0.091594	-0.275472	0.782954	0.998968
YBR116C	16.457	-0.271874	0.665922	-0.408267	0.683078	NA
YDR166C	903.935	0.24613	0.231293	1.06415	0.287263	NA
YDR082W	456.574	0.0654587	0.118081	0.554354	0.579337	NA
YDR348C	1520.1	-0.0821901	0.116368	-0.706293	0.480006	0.998968
YKL182W	18033.1	0.143637	0.145511	0.987127	0.32358	0.998968
YKL018C-A	271.918	-0.139297	0.134894	-1.03264	0.301774	NA
YPL027W	4.28419	-0.4939	0.811423	-0.608684	0.542734	NA
YKL135C	1382.41	0.135341	0.140563	0.96285	0.335623	0.998968
YLR363C	248.814	0.129235	0.263054	0.491287	0.623224	NA
YEL077W-A	3.70345	0.926023	1.09669	0.844379	0.398457	NA
YDR179C	127.414	0.672201	0.638883	1.05215	0.29273	NA
YML089C	16.8227	-0.466804	0.400297	-1.16615	0.243556	NA
YLR431C	230.024	-0.141227	0.115056	-1.22747	0.219647	NA
YKR046C	768.879	-0.18514	0.215532	-0.85899	0.390346	NA
YJR005W	1338.55	0.0778157	0.133033	0.584934	0.558592	0.998968
YJL116C	740.634	0.131149	0.193931	0.676263	0.498873	NA
YMR030W	432.704	0.00168646	0.161403	0.0104487	0.991663	NA
YER030W	1108.22	0.133989	0.1726	0.776297	0.437574	0.998968
YIR026C	1031.97	-0.0336817	0.158354	-0.212698	0.831562	0.998968
YJR072C	1830.13	-0.0795293	0.136631	-0.582075	0.560516	0.998968
YDR515W	463.474	0.246969	0.17194	1.43637	0.150898	NA
YKR039W	10518.7	0.16367	0.182521	0.896717	0.36987	0.998968
YGL003C	854.685	-0.0222385	0.106122	-0.209557	0.834014	NA
YPL009C	1713.64	0.132667	0.185871	0.713759	0.475376	0.998968
YDR268W	361.004	0.0458766	0.133315	0.344123	0.730754	NA
YGL192W	6.12662	0.111345	0.688849	0.16164	0.871589	NA
YDL117W	830.684	0.194896	0.156515	1.24522	0.213051	NA
YMR131C	3235.31	-0.0564216	0.266596	-0.211637	0.83239	0.998968
YMR293C	331.411	0.22913	0.115919	1.97663	0.0480835	NA
YJL214W	17.2707	-0.0856449	0.349152	-0.245294	0.806229	NA
YIL105C	973.565	0.0547251	0.148582	0.368315	0.712638	NA
YML126C	3464.95	-0.1054	0.0910452	-1.15767	0.246998	0.998968
YLR189C	1030.44	0.0471258	0.13738	0.343032	0.731575	0.998968
YIL150C	202.071	0.102781	0.274881	0.37391	0.708472	NA
YLR349W	29.0262	-0.100413	0.349667	-0.287168	0.773983	NA
YGL250W	262.418	-0.0414583	0.222941	-0.185961	0.852476	NA
YBR212W	1907.75	-0.02703	0.168646	-0.160276	0.872663	0.998968
YJR109C	4498.21	-0.113094	0.146054	-0.77433	0.438735	0.998968
YLR254C	269.28	0.0477426	0.153913	0.310192	0.756415	NA
YGR085C	7959.47	-0.119393	0.207002	-0.576774	0.564092	0.998968
YPL105C	2667.36	0.0890307	0.120804	0.736985	0.461131	0.998968
YGR145W	1711.91	0.00160546	0.25814	0.00621932	0.995038	0.998968
YJR094C	128.823	-0.0442636	0.32381	-0.136696	0.891271	NA
YKL177W	9.41144	0.533429	0.543223	0.981971	0.326114	NA
YGL154C	201.713	-0.128798	0.123349	-1.04417	0.296407	NA
YBR129C	802.821	0.10487	0.136734	0.766961	0.443105	NA
tK(UUU)D	6.84418	-0.850735	0.605877	-1.40414	0.160277	NA
YKL099C	787.905	0.0357098	0.250104	0.14278	0.886464	NA
YDR315C	161.175	0.24548	0.324677	0.756076	0.449604	NA
YLR394W	521.619	-0.0561219	0.090378	-0.620968	0.53462	NA
YNL104C	5093.18	-0.147735	0.182793	-0.808208	0.418971	0.998968
YNL151C	909.163	0.0845599	0.173177	0.488286	0.625348	NA
YNR066C	113.967	0.121103	0.200416	0.604256	0.545674	NA
YLR220W	1225.6	-0.018566	0.0935415	-0.198479	0.842671	0.998968
YHR006W	1151.8	0.0237507	0.125484	0.189273	0.849879	0.998968
YMR232W	61.2351	-0.318023	0.384327	-0.827481	0.407964	NA
YNL083W	620.214	-0.0859356	0.108441	-0.792461	0.428092	NA
YGR038C-B	1917.56	-0.170616	0.438163	-0.389388	0.696989	0.998968
YMR238W	1801.88	0.0942095	0.0977181	0.964095	0.334998	0.998968
YER168C	781.41	-0.0703951	0.109053	-0.645511	0.518596	NA
YPL265W	1673.59	0.230431	0.309836	0.743719	0.457046	0.998968
YOR227W	1531.97	0.0454446	0.222873	0.203903	0.838429	0.998968
YOR081C	1222.61	-0.0703184	0.0789865	-0.890259	0.373327	0.998968
YEL026W	3547.35	0.044194	0.19297	0.22902	0.818853	0.998968
YGR050C	62.1814	0.09246	0.228821	0.404071	0.686161	NA
YDR021W	324.656	-0.0170973	0.361382	-0.0473109	0.962265	NA
YGL063W	326.145	-0.051834	0.1888	-0.274544	0.783666	NA
YPL212C	1694.07	0.0628489	0.25235	0.249054	0.803319	0.998968
YOL157C	123.4	0.272629	0.169676	1.60676	0.108107	NA
YOR345C	1.98857	-2.92699	1.47897	-1.97908	0.0478072	NA
YPR095C	1024.87	0.148625	0.105923	1.40314	0.160574	0.998968
YOR310C	5819.96	0.0794524	0.204701	0.388138	0.697914	0.998968
YDR188W	4477.86	-0.0764254	0.150842	-0.50666	0.612394	0.998968
YOL128C	179.512	-0.0811632	0.140617	-0.577194	0.563809	NA
YGL236C	684.833	0.0303792	0.154457	0.196683	0.844076	NA
YHR133C	956.138	-0.0211605	0.0823512	-0.256955	0.797214	NA
YDR017C	1508.08	0.0631585	0.1284	0.491887	0.622799	0.998968
YIL090W	1062.88	0.18618	0.167084	1.11429	0.265153	0.998968
YBR183W	228.498	0.0173012	0.304276	0.0568604	0.954656	NA
YOL048C	535.989	-0.0696969	0.265275	-0.262735	0.792755	NA
YML039W	12.8785	0.41358	2.01152	0.205606	0.837099	NA
YCR007C	246.743	0.146489	0.211266	0.693384	0.488069	NA
YDR540C	77.8191	-0.039751	0.261565	-0.151974	0.879208	NA
YEL004W	269.993	0.169358	0.276551	0.612393	0.540278	NA
YPR057W	632.633	-0.0456197	0.0892728	-0.511014	0.609341	NA
YLL032C	417.89	0.180109	0.223912	0.804375	0.421181	NA
YDR116C	796.369	0.112423	0.125232	0.897721	0.369334	NA
YPL119C-A	42.0604	0.535351	0.586689	0.912495	0.361508	NA
YDR299W	949.107	0.0843823	0.4688	0.179996	0.857155	NA
YLR030W	31.705	0.00251209	0.30923	0.0081237	0.993518	NA
YDR122W	1662.66	-0.0150364	0.212536	-0.0707474	0.943599	0.998968
YOL062C	1628.48	-0.117774	0.106212	-1.10886	0.26749	0.998968
YNL234W	158.597	0.0740716	0.147324	0.502781	0.615118	NA
YLR467W	2235.22	-0.165225	0.118684	-1.39214	0.16388	0.998968
YJL194W	219.527	0.147408	0.16667	0.884429	0.376465	NA
YOL015W	189.349	0.0971335	0.248831	0.39036	0.69627	NA
YDL070W	4655.89	0.262064	0.180967	1.44813	0.147581	0.998968
YOR241W	962.235	-0.075843	0.0968053	-0.78346	0.433357	NA
YLR056W	5785.31	0.153967	0.158029	0.974292	0.329912	0.998968
YMR054W	1935.13	0.00861091	0.0994589	0.0865776	0.931007	0.998968
YKL110C	768.833	-0.0775207	0.192132	-0.403476	0.686598	NA
YML100W-A	2.75746	-0.118009	0.860964	-0.137067	0.890978	NA
YPR070W	625.555	0.0588085	0.183967	0.319668	0.74922	NA
YLR204W	694.362	0.0431726	0.137152	0.314778	0.75293	NA
YML097C	667.767	-0.00436021	0.15638	-0.027882	0.977756	NA
YKR007W	566.219	0.0217572	0.114147	0.190607	0.848833	NA
YDL096C	3.20878	0.13314	0.874458	0.152254	0.878987	NA
YHR193C	8517.62	-0.0336937	0.141562	-0.238013	0.811871	0.998968
YBL099W	14103.5	-0.478237	0.129413	-3.69545	0.000219499	0.018446
YJR035W	451.712	0.0411259	0.123058	0.334199	0.738229	NA
YOR126C	280.884	-0.046815	0.129512	-0.361473	0.717746	NA
YMR023C	312.933	0.0376332	0.13965	0.269483	0.787558	NA
YOR119C	1558.66	0.134156	0.194896	0.688347	0.491234	0.998968
YNL196C	3.9883	0.647315	0.739384	0.875479	0.381314	NA
YNL187W	232.436	0.00452409	0.14744	0.0306843	0.975521	NA
YMR141C	2.0122	-1.07498	1.23023	-0.873804	0.382225	NA
YLL014W	577.601	0.10902	0.126356	0.862799	0.388248	NA
YCR061W	232.019	-0.0584685	0.224802	-0.260089	0.794795	NA
YOR199W	1.24077	1.22269	1.52504	0.801741	0.422703	NA
YPR115W	1838.15	-0.0788213	0.161557	-0.487885	0.625632	0.998968
YHR088W	1173.14	0.0346134	0.226957	0.152511	0.878784	0.998968
YBR017C	1340.22	-0.00472311	0.1699	-0.0277994	0.977822	0.998968
YPR162C	428.824	-0.0226531	0.153191	-0.147875	0.882442	NA
YGR166W	586.482	0.0731196	0.181454	0.402964	0.686975	NA
YDL161W	1476.16	-0.129605	0.0915033	-1.4164	0.15666	0.998968
YKL050C	250.956	-0.0164672	0.140487	-0.117215	0.906689	NA
YJR055W	109.318	0.101025	0.285869	0.353397	0.723791	NA
YGL099W	1673.34	0.108226	0.202979	0.533186	0.593905	0.998968
YFL030W	1008.4	-0.938333	0.151148	-6.20804	5.36489e-10	2.43459e-07
YIL119C	585.504	0.00517323	0.294777	0.0175496	0.985998	NA
YPL193W	736.975	0.142378	0.135034	1.05439	0.291706	NA
YNL005C	1512.67	0.00939389	0.0691318	0.135884	0.891913	0.998968
YJL144W	206.323	0.234112	0.377777	0.61971	0.535449	NA
YBR012W-B	450.14	0.171591	0.182544	0.940001	0.347217	NA
YLR379W	2.83186	-1.49182	0.883082	-1.68934	0.0911552	NA
YJR139C	4195.48	0.0198988	0.0835188	0.238255	0.811683	0.998968
YBR133C	1060.57	-0.0753793	0.07319	-1.02991	0.303051	0.998968
YBR162C	19152.3	0.0163278	0.0865781	0.18859	0.850414	0.998968
YNL331C	211.883	-0.112011	0.115109	-0.973087	0.33051	NA
YJL079C	6934.66	0.0470477	0.113251	0.415429	0.677828	0.998968
YGL019W	1219.66	-0.0432259	0.114132	-0.378736	0.704884	0.998968
YGR201C	274.809	0.0112299	0.160236	0.0700832	0.944127	NA
YNL172W	654.54	0.11617	0.151729	0.765639	0.443891	NA
YNL058C	418.28	0.103307	0.141134	0.731979	0.464182	NA
YPL160W	4777.03	0.104073	0.183879	0.565987	0.571403	0.998968
YNL023C	1009.07	-0.0386443	0.237858	-0.162468	0.870937	0.998968
YDR214W	1737.33	0.249078	0.104225	2.3898	0.0168574	0.423193
YLR222C	1743.26	0.144056	0.434921	0.331223	0.740476	0.998968
YLR295C	2197.62	-0.36742	0.14199	-2.58764	0.00966368	0.30883
YER175W-A	3.31281	0.691837	1.11604	0.619904	0.535321	NA
YHR168W	388.762	-0.0311672	0.101876	-0.305933	0.759656	NA
YOR064C	423.104	-0.121916	0.145228	-0.839485	0.401197	NA
YOR159C	432.794	0.138918	0.126237	1.10045	0.271138	NA
YOL081W	1400.11	0.230516	0.268761	0.857698	0.391059	0.998968
YOL036W	1760.58	0.0294009	0.0753795	0.390039	0.696508	0.998968
YGL148W	4555.99	-0.106087	0.142303	-0.745502	0.455968	0.998968
YOR031W	224.258	-0.508223	0.245055	-2.07391	0.0380873	NA
YBR282W	498.228	0.114699	0.112996	1.01508	0.310069	NA
YDR194C	2830.6	0.21023	0.139363	1.50851	0.131425	0.998968
YOL114C	75.7816	-0.166331	0.288785	-0.575968	0.564637	NA
YGR084C	841.147	0.117932	0.100381	1.17484	0.240057	NA
YNR030W	976.277	-0.081186	0.114062	-0.711771	0.476607	NA
YAL037C-A	1.26372	0.111486	1.35571	0.0822345	0.93446	NA
YML007C-A	6.00515	0.219976	0.57034	0.385692	0.699725	NA
YBR018C	66739.1	0.0811725	0.102775	0.789809	0.429639	0.998968
YKL076C	118.058	-0.00815356	0.188224	-0.0433183	0.965448	NA
YDR466W	887.561	0.0331133	0.0975976	0.339284	0.734396	NA
YFR045W	345.59	-0.0958686	0.170228	-0.563177	0.573314	NA
YIL002C	776.043	0.0786596	0.131274	0.599203	0.549038	NA
YGR159C	10475.6	0.0297626	0.280831	0.105981	0.915598	0.998968
YLR369W	727.32	-0.090809	0.0906298	-1.00198	0.316355	NA
YFR032C	37.1223	0.028875	0.53146	0.0543314	0.956671	NA
YNL118C	2093.65	0.145736	0.105483	1.3816	0.167094	0.998968
YGL228W	2265.45	0.00939358	0.0730369	0.128614	0.897663	0.998968
YJR117W	2328.56	0.145925	0.116695	1.25048	0.211125	0.998968
YBR196C-A	11.0009	0.574259	0.592028	0.969987	0.332053	NA
YBR196C-B	12.0904	-0.0331242	0.513692	-0.0644826	0.948586	NA
YIL030W-A	55.4043	-0.0898298	0.242267	-0.370788	0.710795	NA
YLR357W	1461.52	0.0708029	0.104449	0.677872	0.497853	0.998968
YER127W	567.28	-0.0527844	0.479846	-0.110003	0.912407	NA
YBL015W	1925.06	-0.67855	0.146557	-4.62993	3.65793e-06	0.000691654
YLR017W	1241.94	-0.0935199	0.170384	-0.548878	0.583089	0.998968
YHR110W	922.589	-0.0112176	0.121428	-0.0923808	0.926396	NA
YBR041W	1266.32	0.104346	0.0951376	1.0968	0.272731	0.998968
YOR394W	14.0801	0.0304253	0.386207	0.0787797	0.937208	NA
YDL220C	341.691	-0.0955255	0.139318	-0.685667	0.492923	NA
YDL039C	611.513	-0.552993	0.506498	-1.0918	0.274922	NA
YKL202W	17.3678	-0.0953999	0.353263	-0.270053	0.787119	NA
YGR122C-A	11.6619	0.339991	0.802522	0.423654	0.671818	NA
YOR264W	852.888	0.00903019	0.191923	0.0470512	0.962472	NA
YNL042W-B	1.55404	-1.47213	1.39712	-1.05369	0.292024	NA
YBL029C-A	387.522	-0.263967	0.225547	-1.17034	0.241863	NA
YOR008W-B	18.8121	-0.367706	0.381358	-0.9642	0.334946	NA
YOR366W	23.1408	-0.556311	0.372726	-1.49255	0.135556	NA
YNL275W	435.208	0.0510723	0.158701	0.321816	0.747592	NA
YAR015W	3818.49	-0.27949	0.219782	-1.27167	0.20349	0.998968
YOR384W	115.148	0.197223	0.347191	0.568054	0.569998	NA
YLL051C	1140.54	0.209126	0.164604	1.27048	0.203914	0.998968
YDR427W	1809.82	0.256186	0.286462	0.894311	0.371155	0.998968
YLR079W	1562.12	-0.0369034	0.162497	-0.227103	0.820344	0.998968
YLR408C	84.0175	0.158947	0.242648	0.655052	0.512435	NA
YMR093W	968.971	0.0292527	0.481002	0.0608162	0.951506	NA
YDR079W	294.856	0.103446	0.148197	0.698031	0.485158	NA
YMR268C	293.005	0.16298	0.233545	0.697852	0.48527	NA
YML070W	2176.09	-0.157453	0.157982	-0.996654	0.318933	0.998968
YHR175W-A	104.391	0.197075	0.500587	0.393689	0.693811	NA
YPR072W	1681.72	0.066926	0.104074	0.643059	0.520186	0.998968
YMR108W	5829.44	0.0526811	0.195592	0.269342	0.787667	0.998968
YCR091W	459.768	-0.175584	0.31462	-0.558083	0.576788	NA
YER062C	856.959	-0.444964	0.155422	-2.86294	0.00419731	NA
YDR244W	722.66	-0.0410022	0.111994	-0.366109	0.714283	NA
YER189W	83.9826	-0.396178	0.290761	-1.36256	0.173022	NA
YDL137W	5100.7	-0.033029	0.12512	-0.263978	0.791797	0.998968
YGR271W	942.527	0.0767534	0.198747	0.386187	0.699358	NA
YDR233C	6576.04	0.042552	0.0669249	0.635817	0.524896	0.998968
YGR071C	603.606	0.222647	0.282236	0.788869	0.430189	NA
YCR106W	326.124	0.0833633	0.22386	0.37239	0.709603	NA
YBL100C	2.46438	-0.281869	0.872695	-0.322987	0.746705	NA
YER109C	877.388	0.0252046	0.0964095	0.261432	0.793759	NA
YDR489W	238.428	-0.171826	0.15762	-1.09013	0.275654	NA
YPR049C	490.718	0.0739575	0.20562	0.359681	0.719086	NA
YDL057W	197.749	-0.000273574	0.128974	-0.00212116	0.998308	NA
YGR257C	859.358	-0.114721	0.119729	-0.95817	0.337977	NA
YEL045C	11.6692	0.0306183	0.547968	0.055876	0.955441	NA
YPL235W	1939.97	0.00615055	0.0760776	0.0808458	0.935565	0.998968
YLR122C	27.0691	-0.014461	0.303335	-0.0476735	0.961976	NA
YLR155C	6259.38	-0.144963	0.150013	-0.966338	0.333875	0.998968
YBL087C	4981.86	-0.0607118	0.177338	-0.342351	0.732087	0.998968
YJL132W	219.898	-0.137516	0.214147	-0.642156	0.520772	NA
YGL190C	1041.66	0.209672	0.195802	1.07083	0.284245	0.998968
YBR110W	1027.67	0.169685	0.138795	1.22255	0.221499	0.998968
YDR144C	802.864	0.0225422	0.172214	0.130896	0.895857	NA
YFL046W	545.785	-0.0231353	0.115714	-0.199935	0.841531	NA
YOR103C	515.771	0.297065	0.293606	1.01178	0.311641	NA
YKL137W	473.839	0.216756	0.177943	1.21812	0.223179	NA
YDR447C	5933.07	-0.0156034	0.188833	-0.0826306	0.934145	0.998968
YGL009C	4286.47	0.0924593	0.115683	0.799244	0.424149	0.998968
YPR145W	10008.2	-0.0537077	0.20185	-0.266077	0.79018	0.998968
YJL063C	1159.07	-0.00693446	0.139535	-0.0496968	0.960364	0.998968
YMR149W	2233.62	-0.14365	0.101635	-1.4134	0.157539	0.998968
YIR010W	740.746	0.0500724	0.13369	0.37454	0.708003	NA
YDR331W	696.027	0.00973212	0.0937892	0.103766	0.917355	NA
YJL114W	4.17982	1.02768	1.11782	0.919362	0.357906	NA
YKR044W	466.46	-0.113194	0.219663	-0.515309	0.606337	NA
YLR433C	782.943	-0.103409	0.126406	-0.818067	0.413319	NA
YMR068W	137.495	-0.165274	0.193704	-0.85323	0.393532	NA
YLR157C-B	21.8741	1.60655	2.90461	0.553102	0.580194	NA
YNL164C	309.952	0.036751	0.232066	0.158364	0.87417	NA
YER032W	727.748	0.153127	0.13214	1.15882	0.24653	NA
YJR070C	3349.94	-0.114048	0.216774	-0.526112	0.59881	0.998968
YGL005C	723.734	0.287908	0.128023	2.24888	0.0245201	NA
YHR043C	2044.31	-0.0229238	0.153666	-0.149179	0.881412	0.998968
YDL111C	825.262	-0.0502781	0.147668	-0.340481	0.733494	NA
YMR133W	3.28283	-0.449966	0.804598	-0.559243	0.575996	NA
YPL007C	468.82	0.180939	0.183979	0.983474	0.325374	NA
YKL159C	332.614	0.118371	0.122362	0.967384	0.333352	NA
YDR507C	2250.8	0.0984988	0.161957	0.608177	0.54307	0.998968
YKR075W-A	1.80023	-1.27995	1.12643	-1.13629	0.255833	NA
YLR138W	2053.22	0.0528713	0.0684639	0.772252	0.439965	0.998968
YBR101C	1426.48	0.58587	0.154072	3.80258	0.000143199	0.0129967
YLR396C	474.12	0.0683681	0.146187	0.467675	0.640017	NA
YBR245C	1489.78	0.0849259	0.120901	0.702442	0.482404	0.998968
YJL216C	125.534	-0.0371019	0.148301	-0.25018	0.802448	NA
YBR210W	366.598	0.0462079	0.156942	0.294426	0.768432	NA
YPL103C	545.985	-0.13437	0.0992856	-1.35336	0.175939	NA
YIL103W	651.247	0.119939	0.242572	0.494448	0.62099	NA
YIL152W	327.852	-0.182247	0.159779	-1.14062	0.254028	NA
YJR096W	519.702	-0.217558	0.275114	-0.790793	0.429065	NA
YAL010C	371.005	-0.0494605	0.133146	-0.371476	0.710283	NA
YGR143W	1625.37	0.0890685	0.135688	0.656421	0.511553	0.998968
YGR112W	494.488	-0.168456	0.199144	-0.8459	0.397609	NA
YLR256W	4531.93	0.211788	0.253242	0.836307	0.402982	0.998968
YHR174W	52299.3	0.0352897	0.158627	0.22247	0.823948	0.998968
YOR012W	35.228	0.104206	0.247605	0.420857	0.67386	NA
YIR001C	681.9	-0.0981459	0.0845134	-1.16131	0.245518	NA
YDL213C	1378	0.0212647	0.143236	0.148459	0.881981	0.998968
YDR317W	44.7335	-0.305747	0.370204	-0.825886	0.408869	NA
YDR478W	157.769	-0.0368924	0.201877	-0.182747	0.854997	NA
YNL106C	561.08	0.000329341	0.0983531	0.00334856	0.997328	NA
YOR378W	12.5249	-0.305736	0.491368	-0.622215	0.533801	NA
YFR015C	3359.66	-0.18872	0.748765	-0.252042	NA	NA
YMR230W	5102.18	0.00246934	0.139797	0.0176637	0.985907	0.998968
YIL092W	294.335	0.0193839	0.164876	0.117567	0.906411	NA
YAR009C	11505.6	0.10874	0.265425	0.409683	0.682039	0.998968
YLR321C	784.827	-0.0388054	0.0853631	-0.454593	0.649402	NA
YBR004C	724.367	0.252004	0.460786	0.546902	0.584446	NA
YGR052W	220.63	-0.300407	0.285671	-1.05158	0.292991	NA
YJR161C	359.144	-0.312541	0.196433	-1.59108	0.111591	NA
YOR278W	381.955	-0.00967648	0.0899175	-0.107615	0.914301	NA
YNL085W	2237.06	0.175527	0.264082	0.664667	0.506264	0.998968
YGL061C	286.235	0.149838	0.17722	0.845494	0.397835	NA
YPL210C	1985.63	0.142983	0.176614	0.809577	0.418183	0.998968
YOR087W	1018.91	0.030833	0.0921348	0.334651	0.737888	0.998968
YGL234W	6771.31	-0.218096	0.155475	-1.40277	0.160687	0.998968
YOR347C	641.218	-0.250495	0.281932	-0.888496	0.374274	NA
YPR093C	205.729	-0.15426	0.134833	-1.14408	0.252589	NA
YAL029C	1784.14	0.146179	0.190235	0.768417	0.442239	0.998968
YOL155C	367.648	0.0128821	0.284211	0.0453257	0.963848	NA
YDR421W	502.542	-0.00918138	0.122574	-0.0749047	0.940291	NA
YGR186W	2158.87	0.00427782	0.0666877	0.0641472	0.948853	0.998968
YDR294C	1612.19	-0.0178721	0.072724	-0.245752	0.805874	0.998968
YHR135C	2547.93	-0.0250704	0.084332	-0.297282	0.766252	0.998968
YBR181C	11963.8	-0.105793	0.193833	-0.545792	0.585209	0.998968
YOR078W	775.981	0.115219	0.294102	0.391767	0.695231	NA
YOR243C	2243.27	0.0983517	0.18829	0.522341	0.601433	0.998968
YMR165C	816.998	-0.050217	0.100142	-0.501457	0.616049	NA
YCR005C	1785.18	-0.123133	0.1903	-0.647048	0.517601	0.998968
YPR055W	636.807	0.184475	0.281131	0.656187	0.511704	NA
YIL016W	677.099	-0.0210156	0.153859	-0.136591	0.891354	NA
YLR032W	545.701	0.110718	0.107189	1.03292	0.30164	NA
YDR114C	1.72952	-0.000675534	0.994078	-0.000679558	0.999458	NA
YPR046W	147.453	0.00678198	0.17573	0.0385931	0.969215	NA
YBR099C	38.6916	1.0086	0.556039	1.81391	0.0696917	NA
YBL027W	14888.4	-0.09332	0.141581	-0.659126	0.509815	0.998968
YOL060C	1505.86	-0.109192	0.147167	-0.741957	0.458114	0.998968
YIR018C-A	1.65196	-1.06674	1.2331	-0.865084	0.386993	NA
YOR382W	534.149	0.427274	0.304713	1.40222	0.16085	NA
YNL232W	829.509	-0.0365262	0.174934	-0.2088	0.834605	NA
YDL076C	527.627	0.0934334	0.188493	0.495685	0.620117	NA
YDR120C	1786.96	-0.0435206	0.225972	-0.192592	0.847278	0.998968
YLR465C	36.5764	-0.604425	0.254039	-2.37926	0.0173474	NA
YJL192C	1261.56	0.0747011	0.102169	0.731151	0.464687	0.998968
YLR054C	91.068	0.0729195	0.299229	0.243691	0.80747	NA
YLR009W	2047.14	0.0594016	0.264391	0.224673	0.822233	0.998968
YKL116C	730.373	-0.0657025	0.0951645	-0.69041	0.489936	NA
YOR292C	286.222	-0.186015	0.277263	-0.670896	0.502287	NA
YLR423C	282.739	-0.00209507	0.19612	-0.0106826	0.991477	NA
YLR105C	624.456	-0.0270069	0.0907405	-0.297627	0.765988	NA
YML091C	2230.68	-0.114484	0.303557	-0.377141	0.706069	0.998968
YHR191C	166.819	-0.00414353	0.151127	-0.0274174	0.978127	NA
YDL098C	199.405	0.0814005	0.118723	0.685631	0.492946	NA
YLR202C	51.6924	0.110636	0.225421	0.490798	0.623569	NA
YKR005C	128.976	0.0923779	0.139652	0.661488	0.5083	NA
YMR143W	7621.98	-0.0117312	0.164038	-0.0715149	0.942988	0.998968
YCR063W	83.583	0.184754	0.18311	1.00898	0.312985	NA
YNL189W	3371.16	0.0343981	0.0769463	0.447041	0.654846	0.998968
YFR024C-A	1731.28	-0.0645294	0.109653	-0.588487	0.556206	0.998968
YCL047C	278.25	-0.257239	0.118604	-2.1689	0.0300906	NA
YGL122C	2148.73	-0.0672255	0.126442	-0.53167	0.594955	0.998968
YDL018C	320.453	0.0710257	0.203221	0.349499	0.726715	NA
YOR120W	14136.1	-0.0894701	0.159605	-0.560571	0.57509	0.998968
YPR160W	2506.99	-0.248763	0.814175	-0.30554	NA	NA
YBL060W	462.448	-0.0422885	0.157483	-0.268526	0.788294	NA
YDR065W	196.877	0.0772981	0.263057	0.293845	0.768876	NA
YBR019C	119867	0.216089	0.0773113	2.79506	0.00518904	0.185199
YKL056C	14701.2	0.0142981	0.179257	0.0797633	0.936426	0.998968
YKL065W-A	15.9058	0.131181	0.373191	0.351511	0.725205	NA
YGR160W	16.0239	-0.651906	0.716534	-0.909805	0.362925	NA
YPL068C	304.803	0.030703	0.171838	0.178674	0.858194	NA
YJR057W	481.822	-0.037491	0.0989012	-0.379075	0.704632	NA
YGL211W	849.42	-0.122591	0.156752	-0.78207	0.434174	NA
YFL032W	13.1809	-0.0874817	0.484146	-0.180693	0.856609	NA
YPL195W	1335.78	0.166905	0.19055	0.875912	0.381078	0.998968
YCL044C	815.935	-0.3017	0.15546	-1.94069	0.0522957	NA
YAL059W	637.56	0.0502149	0.247651	0.202765	0.839319	NA
YNL007C	4108.88	0.525323	0.164126	3.20074	0.00137077	0.0775065
YPL148C	142.736	-0.230556	0.168435	-1.36881	0.171059	NA
YJR137C	919.841	-0.0693296	0.116688	-0.594146	0.552414	NA
YMR021C	474.057	-0.0423181	0.0914962	-0.462512	0.643714	NA
YMR074C	711.494	-0.0479859	0.11635	-0.412429	0.680025	NA
YGR203W	215.812	-0.0252482	0.174698	-0.144525	0.885086	NA
YJR039W	396.39	0.129202	0.246898	0.523303	0.600764	NA
YDL158C	75.5242	0.463339	0.57825	0.801277	0.422971	NA
YOR104W	342.006	-0.0113817	0.127677	-0.0891443	0.928967	NA
YFL009W	1156.32	0.00485627	0.0789981	0.0614733	0.950982	0.998968
YLR297W	67.5526	-0.0995338	0.32027	-0.310781	0.755967	NA
YLR279W	1.59842	-0.734343	1.21106	-0.606364	0.544273	NA
YDR216W	3589.28	0.154124	0.229563	0.671377	0.50198	0.998968
YIL120W	246.091	-0.0124427	0.136857	-0.0909171	0.927558	NA
YBR030W	864.292	0.0408251	0.227991	0.179065	0.857887	NA
YPL162C	384.937	-0.0482659	0.130733	-0.369196	0.711982	NA
YGR095C	613.818	-0.0717552	0.206363	-0.347714	0.728055	NA
YCL027W	342.809	-0.678174	0.30451	-2.2271	0.0259404	NA
snR5	14.4497	-0.14727	0.486335	-0.302815	0.762031	NA
snR4	34.0348	0.560248	0.285436	1.96277	0.0496723	NA
snR9	15.5727	-0.229151	0.486265	-0.471247	0.637464	NA
snR8	9.99415	0.105404	0.505255	0.208614	0.834749	NA
YHR029C	596.931	0.036768	0.119009	0.308951	0.757359	NA
YIR021W-A	1.67885	-0.000754023	1.1024	-0.000683982	0.999454	NA
YAL033W	384.856	0.163607	0.171808	0.952267	0.340961	NA
YNL130C	1897.14	0.0923674	0.121511	0.760157	0.447161	0.998968
YNR036C	1309.58	-0.127531	0.187343	-0.680733	0.49604	0.998968
YNR049C	455.42	-0.0808954	0.139804	-0.578632	0.562837	NA
YDR192C	376.194	-0.117502	0.162867	-0.721463	0.470625	NA
YOL112W	996.108	-0.063677	0.101194	-0.629256	0.529182	0.998968
YML109W	595.402	0.0551477	0.172773	0.319192	0.749581	NA
YOL083W	321	0.0259552	0.207977	0.124799	0.900683	NA
YNL251C	1495.81	-0.261518	0.0832785	-3.14029	0.00168782	0.0870377
YBL004W	2014.21	0.243646	0.277185	0.879001	0.379401	0.998968
YER145C-A	3.23713	-0.138306	0.773908	-0.178711	0.858164	NA
YBR164C	983.944	-0.0338157	0.0973321	-0.347426	0.728271	0.998968
YHR074W	2021.06	-0.0750177	0.0717679	-1.04528	0.295893	0.998968
YDR464W	1138.11	0.160087	0.175132	0.914095	0.360667	0.998968
YFR030W	1096.89	-0.100952	0.0699769	-1.44264	0.149121	0.998968
YJL146W	510.688	0.0883226	0.0883999	0.999126	0.317734	NA
YKL078W	572.431	-0.0100672	0.552534	-0.0182201	0.985463	NA
YIL055C	315.457	-0.078958	0.232231	-0.339997	0.733859	NA
YPL053C	1758.35	0.0991616	0.0906668	1.09369	0.27409	0.998968
YLR351C	1565.39	-0.0782725	0.0957407	-0.817547	0.413616	0.998968
YEL009C-A	3.98664	0.189784	0.750774	0.252784	0.800435	NA
YJR111C	411.648	-0.00038552	0.193287	-0.00199455	0.998409	NA
YIL030C	2197.03	0.178902	0.206817	0.86503	0.387023	0.998968
YER125W	2683.2	0.0888384	0.0979754	0.906741	0.364544	0.998968
YER152C	1294.15	-0.115287	0.118278	-0.974712	0.329703	0.998968
YLR015W	440.7	-0.0767966	0.162502	-0.472588	0.636507	NA
YHR116W	222.384	0.307553	0.204921	1.50083	0.133399	NA
YPL259C	1095.7	0.0214012	0.109463	0.19551	0.844993	0.998968
YOL100W	962.634	0.0769127	0.139418	0.551671	0.581174	NA
YOR039W	1053.18	0.058432	0.0776126	0.752868	0.451529	0.998968
YDL037C	194.49	-0.32746	0.569943	-0.574548	0.565597	NA
YHL043W	1.28772	1.26698	1.37604	0.920746	0.357183	NA
YOR364W	6.2211	0.0489207	0.553706	0.0883513	0.929598	NA
YOR386W	363.081	0.0159686	0.26749	0.0596981	0.952396	NA
YAR042W	1275.99	-0.0412912	0.102096	-0.404433	0.685894	0.998968
YPR198W	1074.12	0.123155	0.185855	0.662638	0.507563	0.998968
YHL038C	419.728	-0.0413254	0.0897202	-0.460603	0.645084	NA
YLL053C	72.0426	-0.520557	0.301218	-1.72817	0.0839569	NA
YDR425W	496.794	0.0784068	0.251364	0.311926	0.755097	NA
YOR331C	9.17466	-0.329324	0.569826	-0.577939	0.563306	NA
YML076C	689.669	0.0946661	0.107171	0.883316	0.377066	NA
YKR060W	429.148	-0.0161787	0.288661	-0.0560475	0.955304	NA
YHR094C	4.64714	-0.261291	0.748336	-0.349163	0.726967	NA
YER069W	975.121	-0.16615	0.130134	-1.27676	0.201687	NA
YMR091C	1276.3	-0.082953	0.0706884	-1.1735	0.240595	0.998968
YER012W	2127.5	0.0949486	0.127091	0.747092	0.455008	0.998968
YHR098C	2480.91	0.0180375	0.129136	0.139679	0.888914	0.998968
YDL135C	1085.04	-0.0601437	0.108226	-0.555724	0.578399	0.998968
YCR093W	2067.28	0.111756	0.25375	0.440417	0.659635	0.998968
YGR273C	1.41869	0.507951	1.62168	0.313225	0.754109	NA
YGL080W	582.219	0.134936	0.146116	0.923482	0.355756	NA
YBR069C	4145.69	0.0504699	0.235738	0.214093	0.830475	0.998968
YGR077C	697.691	0.0136083	0.131361	0.103595	0.917491	NA
YCR104W	6.40074	-0.85984	0.573494	-1.4993	0.133796	NA
YDR040C	3002.53	-0.0141952	0.239296	-0.0593205	0.952697	0.998968
YPR012W	9.82645	-0.0230253	0.447175	-0.0514906	0.958935	NA
YGR255C	1152.43	-0.159346	0.170156	-0.93647	0.349031	0.998968
YDL051W	2433.94	-0.0125253	0.15805	-0.0792489	0.936835	0.998968
YBL102W	771.207	-0.0619364	0.124708	-0.496651	0.619435	NA
tM(CAU)P	1.76562	1.95638	1.23337	1.5862	0.112693	NA
YPL237W	4243.81	-0.00754716	0.110209	-0.0684807	0.945403	0.998968
YLR120C	3538.19	-0.208456	0.252419	-0.825832	0.408899	0.998968
YCL001W-B	5.70819	-0.838639	0.62782	-1.33579	0.181616	NA
YCL001W-A	3.85228	1.50034	0.816554	1.8374	0.0661506	NA
YNL068C	607.266	0.007252	0.210889	0.0343878	0.972568	NA
YBL002W	6227.84	0.114272	0.0944405	1.20999	0.226284	0.998968
YDR146C	1139.68	0.186974	0.0802369	2.33027	0.0197918	0.453612
YBR112C	2533.03	-0.0165776	0.0890407	-0.18618	0.852304	0.998968
YBL081W	660.753	-0.0648851	0.290158	-0.22362	0.823053	NA
YFL040W	7.17491	-0.0784911	0.675403	-0.116214	0.907483	NA
YNL326C	415.52	-0.0828603	0.098711	-0.839423	0.401232	NA
YDR337W	795.483	0.0709449	0.105855	0.670206	0.502727	NA
YJL061W	913.233	0.132356	0.195516	0.676954	0.498435	NA
YPR147C	705.263	0.021254	0.112684	0.188616	0.850394	NA
YKL131W	2.47834	0.298511	0.881417	0.338671	0.734858	NA
YDR441C	498.694	0.00224189	0.200498	0.0111816	0.991079	NA
YPL094C	2534.77	-0.166943	0.123388	-1.35299	0.176057	0.998968
YOR101W	2265.49	0.0860138	0.186774	0.460524	0.64514	0.998968
YER020W	1599.41	-0.252901	0.271054	-0.933025	0.350807	0.998968
YDR231C	480.066	-0.444754	0.214271	-2.07566	0.0379256	NA
YJL112W	1096.24	-0.000483529	0.066667	-0.0072529	0.994213	0.998968
YFL066C	413.539	-0.282272	0.239856	-1.17684	0.239259	NA
YNL193W	594.994	-0.0070687	0.160213	-0.0441206	0.964808	NA
YML058W	2103.12	-0.262933	0.200301	-1.31269	0.189288	0.998968
YBR188C	261.466	0.0115061	0.129372	0.0889381	0.929131	NA
YLR435W	614.221	0.0738382	0.23036	0.320534	0.748564	NA
YJR076C	1945.22	0.000502011	0.0744399	0.00674385	0.994619	0.998968
YKL157W	3688.72	0.0177421	0.0963809	0.184083	0.853948	0.998968
YBR003W	1034.13	-0.188235	0.160182	-1.17513	0.239942	0.998968
YPR129W	1748.09	-0.0648956	0.0683902	-0.948902	0.34267	0.998968
YDL113C	900.059	0.0843569	0.182555	0.46209	0.644017	NA
YMR135C	1224.92	-0.144893	0.220178	-0.658071	0.510492	0.998968
YGL007W	2.14161	-2.2366	1.19788	-1.86713	0.0618837	NA
YPL005W	298.121	0.0634579	0.123977	0.511853	0.608754	NA
YBR247C	1189.26	0.059133	0.313756	0.188468	0.85051	0.998968
YLR185W	4858.75	-0.169143	0.202562	-0.835016	0.403708	0.998968
YJL210W	637.756	-0.264	0.226231	-1.16695	0.243232	NA
YLR398C	1407.07	0.0872111	0.13601	0.64121	0.521387	0.998968
YIL154C	822.102	-0.108102	0.164515	-0.657094	0.511121	NA
YIL101C	1009.48	-0.283371	0.448484	-0.631843	0.52749	0.998968
YKL004W	1683.51	0.262265	0.182969	1.43338	0.151749	0.998968
YPL154C	6939.56	-0.0528462	0.210818	-0.250672	0.802068	0.998968
YPL101W	1144.3	-0.0542091	0.152472	-0.355535	0.722189	0.998968
YLR258W	3265.81	-0.129791	0.54851	-0.236625	0.812948	0.998968
YBR178W	1.61566	1.15103	1.13193	1.01688	0.309211	NA
YJR098C	219.568	-0.0130729	0.137693	-0.0949419	0.924361	NA
YHR176W	232.978	-0.215673	0.155686	-1.38531	0.165958	NA
YJR018W	7.62824	-0.0412534	0.64687	-0.0637738	0.94915	NA
YDL244W	41.382	0.424236	0.282062	1.50405	0.132567	NA
YDR319C	499.188	0.0707391	0.277534	0.254884	0.798813	NA
YKL095W	460.241	-0.292751	0.172311	-1.69897	0.0893247	NA
YOL099C	4.929	0.596391	0.755088	0.78983	0.429627	NA
YIL094C	2583.3	0.0181706	0.122198	0.148698	0.881792	0.998968
YLR451W	980.515	0.0598721	0.175989	0.340205	0.733702	NA
YFR017C	694.953	-0.349286	0.336425	-1.03823	0.299163	NA
YLR342W-A	16.4499	0.676441	0.668411	1.01201	0.311532	NA
YIL076W	1854.86	0.00746879	0.0889548	0.0839616	0.933087	0.998968
YOL044W	338.622	0.0565927	0.137743	0.410857	0.681177	NA
YLR323C	223.367	-0.1509	0.167439	-0.901223	0.36747	NA
YOR085W	1798.89	0.00972142	0.077183	0.125953	0.899769	0.998968
YGR054W	2792.58	0.0488804	0.171833	0.284464	0.776055	0.998968
YOR050C	2.16939	-0.536267	0.97917	-0.547675	0.583915	NA
YNL087W	2897.72	0.102692	0.107093	0.958903	0.337608	0.998968
YLR318W	244.839	0.259286	0.374327	0.692671	0.488516	NA
YBR278W	299.107	-0.198453	0.147654	-1.34404	0.178936	NA
YNL024C-A	399.769	-0.0487166	0.11748	-0.414678	0.678377	NA
YDR296W	1023.25	-0.0448973	0.133444	-0.336449	0.736532	0.998968
YGL232W	865.866	0.135856	0.1449	0.937586	0.348457	NA
YPR091C	1463.62	0.00315486	0.144508	0.0218318	0.982582	0.998968
YGR141W	562.316	0.0405403	0.154368	0.26262	0.792843	NA
YAR030C	11.6511	-0.192315	0.428229	-0.449095	0.653363	NA
YGL111W	1480.78	0.0102327	0.216564	0.0472504	0.962314	0.998968
YHR137W	1359.46	-0.298348	0.194467	-1.53419	0.124984	0.998968
YFL011W	35.9847	0.166504	0.540989	0.307777	0.758252	NA
YMR198W	434.034	0.0332098	0.112528	0.295125	0.767899	NA
YCR003W	511.895	0.228721	0.190841	1.19849	0.230725	NA
YMR316C-B	72.6609	-0.137403	0.204576	-0.671648	0.501808	NA
YMR316C-A	4.97206	-0.528812	0.758885	-0.696828	0.485911	NA
YDR342C	13816.7	0.233988	0.200428	1.16744	0.243032	0.998968
YMR163C	453.595	0.0981979	0.161787	0.606956	0.54388	NA
YGR294W	20.9002	-0.789951	0.378171	-2.08887	0.0367193	NA
YEL008W	4.27919	-0.303214	0.688875	-0.440159	0.659822	NA
YLL067C	38.1499	0.72202	1.2537	0.575911	0.564675	NA
YBR020W	133716	0.08655	0.0710096	1.21885	0.222901	0.998968
YLR418C	912.363	-0.050944	0.0837438	-0.608332	0.542967	NA
YDR112W	1.36209	-2.18541	1.36487	-1.60119	0.109335	NA
YER059W	706.956	-0.0321763	0.122158	-0.263399	0.792243	NA
YNL076W	875.457	0.0592282	0.0703399	0.842028	0.399772	NA
YBL025W	155.423	-0.186983	0.142566	-1.31155	0.189672	NA
YOL066C	632.835	-0.120869	0.108136	-1.11775	0.263672	NA
YDR126W	202.675	-0.0325719	0.131308	-0.248057	0.804091	NA
YPL216W	338.091	0.160856	0.19638	0.819106	0.412726	NA
YOR223W	287.166	-0.116858	0.174863	-0.668282	0.503954	NA
YEL022W	1248.73	0.204883	0.278024	0.736924	0.461169	0.998968
YHR072W	2108.64	-0.0494146	0.0935871	-0.528007	0.597495	0.998968
YOL019W	2989.04	0.0154458	0.0971456	0.158997	0.873671	0.998968
YLR463C	106.231	-0.512612	0.212361	-2.41387	0.0157843	NA
YJL190C	7839.74	-0.0558256	0.195555	-0.285472	0.775282	0.998968
YMR218C	687.46	0.166999	0.188814	0.884462	0.376447	NA
YNL265C	809.563	-0.0387616	0.13209	-0.293449	0.769179	NA
YNL230C	276.071	0.0250503	0.134098	0.186806	0.851812	NA
YLL049W	237.432	0.0269999	0.140168	0.192626	0.847252	NA
YHR211W	601.51	-0.0363319	0.141666	-0.256462	0.797594	NA
YPR166C	557.301	0.0746823	0.0880919	0.847777	0.396562	NA
YJL042W	2043.64	0.02889	0.113325	0.25493	0.798777	0.998968
YNL301C	1591.18	-0.0619885	0.177303	-0.349619	0.726624	0.998968
YDR333C	1142.79	0.0544543	0.123171	0.442102	0.658416	0.998968
YMR058W	21077	0.0966749	0.147069	0.657342	0.510961	0.998968
YDR061W	792.84	-0.00441385	0.0773567	-0.0570584	0.954499	NA
YJR112W-A	366.399	-0.201658	0.155143	-1.29982	0.193664	NA
YOR290C	2198.14	0.175464	0.106898	1.64141	0.100712	0.998968
YKL114C	1015.54	-0.112963	0.0938641	-1.20348	0.228792	0.998968
YML024W	10701.5	-0.0758373	0.127968	-0.592629	0.55343	0.998968
YML093W	2259.71	0.0759595	0.318558	0.238448	0.811534	0.998968
YHR197W	1095.64	0.144373	0.459293	0.314337	0.753265	0.998968
YDR276C	1480.87	-0.086635	0.133663	-0.648158	0.516883	0.998968
YLR200W	483.318	0.130208	0.0911861	1.42794	0.153309	NA
YKR003W	655.03	-0.0425122	0.151685	-0.280265	0.779274	NA
YLR107W	689.969	0.10303	0.113461	0.908069	0.363842	NA
YMR321C	18.6571	-1.61293	3.23766	-0.498177	0.61836	NA
YER175C	686.888	-0.179203	0.140367	-1.27668	0.201716	NA
YIR012W	1687	-0.0279923	0.244888	-0.114307	0.908995	0.998968
YDL183C	174.237	0.200117	0.203194	0.984857	0.324694	NA
YPL278C	143.607	-0.180462	0.15182	-1.18865	0.234576	NA
YMR105W-A	1.32338	-0.179121	1.48342	-0.120749	0.90389	NA
YMR118C	4.4807	-1.0151	0.780105	-1.30123	0.193179	NA
YCL049C	698.051	-0.0196343	0.154367	-0.127192	0.898789	NA
YBL066C	1009.81	-0.150432	0.121974	-1.23331	0.217461	0.998968
YGL120C	3352.5	-0.00298326	0.256949	-0.0116103	0.990737	0.998968
YGR271C-A	492.088	0.397258	0.260488	1.52505	0.127246	NA
YDR169C	1206.42	-0.0617268	0.119409	-0.516936	0.605201	0.998968
YOR057W	657.364	0.0194332	0.124052	0.156653	0.875518	NA
YLR410W-A	130.99	0.0615191	1.26978	0.0484485	0.961359	NA
YLR169W	1.43573	-0.75312	1.30564	-0.576819	0.564062	NA
YMR272C	2802.29	0.10036	0.0950135	1.05628	0.290842	0.998968
YPR108W	2118.68	0.0381691	0.0769031	0.496328	0.619663	0.998968
YKL054C	3631.43	0.0191531	0.0934078	0.205048	0.837535	0.998968
YGR162W	5223.38	0.0500604	0.221707	0.225795	0.821361	0.998968
YDL165W	571.206	-0.159089	0.14149	-1.12438	0.260851	NA
YDR520C	440.654	0.139224	0.248772	0.559642	0.575723	NA
YKL023W	447.273	-0.167605	0.174456	-0.960726	0.33669	NA
YJR051W	1045.99	-0.00027885	0.0708113	-0.00393793	0.996858	0.998968
YNL009W	219.589	0.0457834	0.124931	0.366468	0.714016	NA
YFL034W	921.618	0.0301622	0.0855516	0.352562	0.724417	NA
YKL164C	7263.02	-0.0191225	0.206935	-0.0924081	0.926374	0.998968
YJR135C	149.264	-0.0440861	0.13633	-0.323378	0.746409	NA
YGL213C	890.884	-0.0126733	0.0815249	-0.155453	0.876465	NA
YMR076C	743.129	0.419582	0.279901	1.49904	0.133864	NA
YOR161W-B	16.2244	-0.304066	0.370744	-0.82015	0.412131	NA
YNL027W	1124.94	0.105646	0.140001	0.754607	0.450485	0.998968
YLR291C	1006.6	-0.0100926	0.175449	-0.0575247	0.954127	0.998968
YDR210W	359.423	-0.295373	0.163548	-1.80604	0.0709121	NA
YIL122W	411.783	-0.106719	0.0991092	-1.07678	0.281578	NA
YDL230W	351.515	-0.210964	0.189928	-1.11076	0.266672	NA
YJR113C	1091.47	-0.151371	0.163611	-0.925188	0.354868	0.998968
YGL075C	170.827	0.0371862	0.139166	0.267207	0.78931	NA
YHR041C	529.792	-0.0425563	0.165805	-0.256665	0.797437	NA
YIL156W-B	415.361	-0.1191	0.198821	-0.599029	0.549154	NA
YIL156W-A	2.40092	-0.57504	1.03179	-0.557323	0.577307	NA
YLR416C	5.39641	-0.592983	0.657595	-0.901745	0.367192	NA
YGR097W	1461.25	0.142431	0.0972159	1.4651	0.142894	0.998968
YIL068C	880.783	0.0817193	0.127283	0.642027	0.520856	NA
YCL025C	13837.7	0.0427233	0.182883	0.233609	0.815288	0.998968
YNR034W	400.497	-0.0330179	0.234418	-0.140851	0.887988	NA
YNL282W	245.899	-0.118711	0.247474	-0.479691	0.631447	NA
YBR286W	9654.88	-0.0905149	0.130909	-0.691433	0.489293	0.998968
YGL144C	405.426	0.0565254	0.116501	0.485192	0.62754	NA
YDR190C	2644.46	0.0117656	0.154561	0.0761224	0.939322	0.998968
YAL031C	682.284	-0.0670922	0.145754	-0.460311	0.645293	NA
YBL006C	817.613	0.135291	0.166851	0.810851	0.417451	NA
YNL132W	2276.12	0.121673	0.298464	0.407665	0.683519	0.998968
YBR264C	318.238	-0.276361	0.151325	-1.82627	0.0678091	NA
YBR231C	324.974	-0.123597	0.146992	-0.84084	0.400438	NA
YLR162W-A	5.20554	-0.325081	0.721457	-0.450589	0.652285	NA
YPL197C	3.60835	-0.118679	0.865967	-0.137048	0.890993	NA
YHR076W	990.12	-0.0180119	0.115048	-0.156559	0.875592	0.998968
YDR462W	472.148	0.100193	0.154674	0.647767	0.517136	NA
YJL148W	1388.79	0.0885177	0.217506	0.406967	0.684032	0.998968
YIL057C	153.964	0.783723	0.24003	3.2651	0.00109425	NA
YPL055C	526.68	-0.0949811	0.152375	-0.623339	0.533061	NA
YLR353W	1009.02	-0.0232858	0.131256	-0.177408	0.859188	0.998968
YIL020C	246.092	0.0320757	0.192143	0.166937	0.86742	NA
YIL148W	10305	-0.077678	0.141617	-0.548507	0.583344	0.998968
YNR016C	14806.2	0.130549	0.0902052	1.44724	0.147829	0.998968
YFR036W	117.256	-0.433531	0.179547	-2.41459	0.015753	NA
YHR114W	969.238	0.097057	0.113461	0.85542	0.392319	NA
YGR028W	1021.89	-0.077711	0.146087	-0.531949	0.594761	0.998968
YER150W	387.429	-0.401319	0.51499	-0.779275	0.435818	NA
YNL279W	132.996	-0.578816	0.26091	-2.21845	0.026524	NA
YDR400W	660.636	-0.182147	0.113463	-1.60534	0.10842	NA
YDL068W	2.69819	1.39498	0.876048	1.59236	0.111304	NA
YOL027C	2318.61	-0.000514368	0.1165	-0.00441516	0.996477	0.998968
YPL257W	97.8745	0.121043	0.274683	0.440664	0.659456	NA
YPL120W	253.981	0.0821305	0.173687	0.472865	0.636309	NA
YOL145C	2299.63	0.151267	0.183413	0.824737	0.409521	0.998968
YJL099W	503.282	-0.0833566	0.102093	-0.816481	0.414225	NA
YHR149C	1019.47	0.0688444	0.237337	0.29007	0.771763	0.998968
YDR395W	2024.53	0.125209	0.247131	0.506649	0.612401	0.998968
YOL110W	378.682	-0.209461	0.1692	-1.23795	0.215736	NA
YDR005C	1045.12	0.116173	0.140651	0.825966	0.408824	0.998968
YMR311C	1587.05	-0.144603	0.200885	-0.71983	0.47163	0.998968
YBL039C	2894.69	-0.0636816	0.307535	-0.207071	0.835955	0.998968
YGR188C	259.556	0.219567	0.17498	1.25481	0.209547	NA
YOR362C	2498.95	-0.127877	0.158707	-0.805745	0.42039	0.998968
YPR106W	457.73	-0.0373296	0.099588	-0.37484	0.707779	NA
YLR126C	669.741	-0.0584729	0.11577	-0.505077	0.613505	NA
YDL053C	804.271	0.100185	0.0772973	1.2961	0.19494	NA
YML074C	4261	-0.0485601	0.116388	-0.417225	0.676514	0.998968
YKR062W	707.699	-0.0885746	0.0968502	-0.914553	0.360426	NA
YBR235W	1054.31	0.117514	0.0659353	1.78227	0.0747057	0.998968
YER010C	580.492	0.0466592	0.106315	0.438875	0.660752	NA
YML003W	106.337	0.107217	0.252974	0.423826	0.671692	NA
YMR097C	570.306	-0.111213	0.0935461	-1.18886	0.234495	NA
YDL133W	683.92	0.108686	0.0783152	1.3878	0.165199	NA
YNL330C	1378.81	-0.0559171	0.0671454	-0.832776	0.404971	0.998968
YGR228W	16.743	-0.129953	0.627796	-0.206998	0.836011	NA
YHR096C	187.492	-0.0819269	0.228467	-0.358593	0.719899	NA
YBR008C	531.813	-0.105472	0.1604	-0.657554	0.510825	NA
YDL035C	1004.45	0.0938699	0.102667	0.914316	0.360551	0.998968
YMR253C	383.27	0.0556497	0.170493	0.326404	0.744118	NA
YCR102C	164.371	0.382751	0.164412	2.328	0.0199124	NA
YJL127C-B	323.546	-0.0170065	0.148485	-0.114533	0.908815	NA
YOR257W	676.607	0.0523534	0.131041	0.399519	0.689511	NA
YGR002C	572.012	0.0319872	0.0827907	0.386362	0.699229	NA
YEL041W	207.015	0.0317829	0.237326	0.133921	0.893465	NA
YGR075C	150.443	0.135905	0.24851	0.546877	0.584463	NA
YGR253C	2421.2	0.00908989	0.0744406	0.122109	0.902813	0.998968
YDR510W	2004.68	-0.0315094	0.13151	-0.239597	0.810643	0.998968
YPL050C	2230.4	0.0313079	0.0893167	0.350527	0.725943	0.998968
YMR166C	289.775	-0.100205	0.0953068	-1.0514	0.293077	NA
YPR045C	643.47	0.0760972	0.183636	0.414392	0.678587	NA
YPL231W	21766.8	0.0365948	0.119704	0.305711	0.759825	0.998968
YLR148W	672.648	0.241934	0.240963	1.00403	0.315365	NA
YMR137C	324.637	0.199928	0.164124	1.21815	0.223165	NA
YDL082W	6441.1	-0.102637	0.175298	-0.585499	0.558212	0.998968
YKL155C	824.851	0.175442	0.127329	1.37786	0.168245	NA
YBR162W-A	1014.83	-0.112395	0.195729	-0.574238	0.565807	0.998968
YFL042C	852.121	0.042067	0.164393	0.255892	0.798034	NA
YBL083C	220.179	-0.289724	0.199915	-1.44923	0.147273	NA
YDR148C	4492.38	-0.418646	0.0940123	-4.45311	8.46373e-06	0.00137173
YHR052W-A	285.972	-0.607828	0.589788	-1.03059	0.302734	NA
YPL096W	524.832	-0.0755111	0.131907	-0.572457	0.567012	NA
YDR335W	1845.63	0.105448	0.144135	0.731589	0.464419	0.998968
YPR141C	358.338	0.264521	0.17121	1.54501	0.122345	NA
YMR039C	1534.08	-0.121259	0.135598	-0.894259	0.371183	0.998968
YIL058W	2.60942	-0.719401	0.894262	-0.804464	0.421129	NA
YNL320W	436.19	0.0193671	0.12128	0.159689	0.873126	NA
YPL078C	5308.78	-0.434522	0.148311	-2.9298	0.00339182	0.137429
YCR095C	388.42	0.0618574	0.173737	0.35604	0.72181	NA
YLL011W	907.229	0.109552	0.430087	0.254721	0.798939	NA
YCR077C	2951.87	0.0968951	0.0904306	1.07149	0.283951	0.998968
YLR437C	263.089	-0.0103474	0.166679	-0.0620795	0.9505	NA
YFL064C	79.2155	-0.352659	1.1817	-0.298434	0.765372	NA
YNL191W	225.108	-0.0722236	0.149481	-0.483161	0.628981	NA
YDR237W	884.012	0.00730275	0.0853358	0.0855766	0.931803	NA
YJL110C	892.905	0.114778	0.0850713	1.3492	0.177273	NA
YKR048C	3502.62	-0.0491273	0.102414	-0.479692	0.631447	0.998968
YBR001C	844.919	-0.0990368	0.132836	-0.745555	0.455936	NA
YPL003W	378.187	-0.437865	0.274288	-1.59637	0.110406	NA
YKL108W	340.338	-0.0372867	0.133445	-0.279416	0.779926	NA
YGR110W	368.923	-0.356627	0.151662	-2.35146	0.0187001	NA
YJR074W	939.572	-0.209062	0.134623	-1.55294	0.120436	NA
YPR127W	719.041	-0.144337	0.115206	-1.25286	0.210255	NA
YIR028W	54.3307	0.263022	0.321204	0.818862	0.412865	NA
YAL012W	4724.12	-0.139877	0.163365	-0.856223	0.391874	0.998968
YMR288W	654.678	0.105633	0.157632	0.670125	0.502778	NA
YIL156W	693.018	0.107084	0.102251	1.04727	0.294976	NA
YBR241C	549.478	-0.2345	0.236537	-0.991391	0.321495	NA
YHR063W-A	2.6348	1.22892	1.005	1.22281	0.221401	NA
YJL212C	124.403	0.0686538	0.349381	0.196501	0.844218	NA
YPL156C	490.11	0.1235	0.218052	0.566378	0.571137	NA
YNL312W	1104.66	-0.0340024	0.0892122	-0.38114	0.703099	0.998968
YLR187W	651.501	0.0674775	0.097553	0.691701	0.489125	NA
YDR099W	5069.22	0.0406873	0.105854	0.384371	0.700704	0.998968
YKL133C	312.965	0.0337584	0.251874	0.134029	0.89338	NA
YHR170W	3377.2	-0.0169677	0.207981	-0.0815827	0.934979	0.998968
YDR259C	92.6364	-0.00914834	0.265386	-0.0344718	0.972501	NA
YKL068W	1629.74	0.0645156	0.20985	0.307438	0.75851	0.998968
YOR032C	215.341	0.14863	0.208596	0.712524	0.47614	NA
YKL093W	877.008	-0.0925613	0.227002	-0.407755	0.683454	NA
YMR002W	3000.01	-0.0915264	0.0921134	-0.993628	0.320404	0.998968
YLR145W	268.789	-0.00308332	0.109222	-0.0282299	0.977479	NA
YLR261C	299.228	0.149011	0.140323	1.06191	0.288276	NA
YDL246C	136.565	-0.681093	0.351134	-1.9397	0.0524168	NA
YER081W	2544.17	-0.183995	0.48696	-0.377844	0.705547	0.998968
YPL178W	1121.38	-0.0360342	0.0632194	-0.569986	0.568687	0.998968
YPR202W	270.909	0.466887	0.749291	0.623106	0.533215	NA
YIL096C	481.951	-0.00849726	0.304988	-0.0278609	0.977773	NA
YFR011C	933.17	-0.0858164	0.0838912	-1.02295	0.306332	NA
YIL074C	1465.41	-0.151095	0.0809119	-1.86741	0.061845	0.998968
YGL173C	4102.75	0.0791125	0.122442	0.646122	0.5182	0.998968
YHL008C	623.596	0.00538738	0.0905293	0.0595098	0.952546	NA
YLR457C	304.49	-0.0595031	0.10596	-0.561562	0.574415	NA
YNL249C	321.017	-0.0949183	0.112609	-0.842898	0.399286	NA
YGR056W	843.958	0.128033	0.126801	1.00972	0.312628	NA
YGL065C	810.03	0.109981	0.176263	0.623962	0.532652	NA
YOR052C	1019.68	-0.182144	0.199001	-0.915294	0.360037	0.998968
YGR116W	3238.33	0.119245	0.139858	0.852614	0.393873	0.998968
YOR343C	28.2026	-0.334224	0.37593	-0.889059	0.373971	NA
YGL230C	5.82971	-0.0949502	0.693266	-0.136961	0.891062	NA
YOL159C	143.668	0.158399	0.257612	0.614873	0.538639	NA
YBR185C	499.398	0.107737	0.146422	0.735793	0.461857	NA
YOR010C	201.074	-0.0173006	0.178276	-0.0970441	0.922691	NA
YDR019C	795.33	-0.248058	0.241275	-1.02811	0.303897	NA
YBR150C	622.137	0.267738	0.185681	1.44193	0.149323	NA
YIR042C	59.662	-0.079401	0.495646	-0.160197	0.872726	NA
YER119C	587.495	-0.237343	0.217453	-1.09147	0.275067	NA
YMR196W	1454.93	-0.257105	0.442097	-0.581559	0.560863	0.998968
YMR161W	584.622	-0.0177899	0.138871	-0.128104	0.898067	NA
YDR499W	571.77	0.162507	0.158385	1.02602	0.304881	NA
YKL068W-A	202.292	-0.0264635	0.146937	-0.180102	0.857073	NA
YJL133C-A	410.566	-0.43764	0.240284	-1.82135	0.0685543	NA
YDL215C	4109.83	0.457273	0.250135	1.82811	0.0675338	0.998968
YJR120W	88.6555	-0.577342	0.27672	-2.08638	0.0369444	NA
YLL061W	504.552	-0.150442	0.172457	-0.872349	0.383018	NA
YDR110W	647.943	0.0915884	0.235199	0.389408	0.696974	NA
YDR419W	469.063	-0.0872	0.0858067	-1.01624	0.309516	NA
YOR221C	607.835	0.0338906	0.119491	0.283626	0.776697	NA
YPL214C	655.322	-0.0980602	0.100704	-0.973743	0.330184	NA
YBL108C-A	21.1168	-0.234051	0.317588	-0.736964	0.461144	NA
YGL165C	4.04348	0.288357	0.723271	0.398684	0.690126	NA
YOL064C	967.628	-0.100951	0.115199	-0.876324	0.380854	NA
YBL023C	782.902	0.0779947	0.0735889	1.05987	0.289203	NA
YOR274W	612.846	-0.00587093	0.0880633	-0.0666672	0.946847	NA
YOR329C	1357.97	-0.0126762	0.111792	-0.11339	0.909721	0.998968
YLR005W	934.016	-0.124456	0.0693889	-1.7936	0.0728763	NA
YDR124W	97.3031	-0.0494904	0.187312	-0.264214	0.791615	NA
YNL267W	1448.9	0.038707	0.0953245	0.406055	0.684702	0.998968
YLR461W	7.40175	-0.572392	0.560011	-1.02211	0.30673	NA
YLR050C	337.582	-0.147471	0.146683	-1.00537	0.314718	NA
YOR124C	1131.88	0.12667	0.185886	0.681443	0.495591	0.998968
YDR067C	337.781	0.140078	0.211674	0.661764	0.508123	NA
YMR056C	277.276	-0.109974	0.203432	-0.540596	0.588786	NA
YHR032W-A	77.6174	-0.0222838	0.219092	-0.10171	0.918987	NA
YJL044C	1006.51	0.0939563	0.124749	0.753163	0.451352	0.998968
YPR164W	765.624	0.133023	0.226412	0.587525	0.556851	NA
YEL060C	10953.4	-0.141491	0.233107	-0.60698	0.543864	0.998968
YHR195W	659.036	-0.147092	0.215073	-0.683917	0.494027	NA
YLR101C	17.9945	0.0893619	0.337524	0.264757	0.791197	NA
YBL107W-A	8.55951	0.420995	0.833841	0.504887	0.613638	NA
YML026C	10462.2	0.0252021	0.148253	0.169994	0.865015	0.998968
YPR066W	172.421	-0.0993246	0.172502	-0.575789	0.564758	NA
YDR073W	564.456	-0.0803513	0.0751968	-1.06855	0.285274	NA
YDR229W	847.359	-0.0281913	0.1439	-0.19591	0.844681	NA
YDL181W	1518.66	-0.584631	0.15007	-3.89571	9.79126e-05	0.0105792
YBR022W	313.066	0.0015504	0.11759	0.0131848	0.98948	NA
YER177W	11070.4	-0.126304	0.141782	-0.890829	0.373021	0.998968
YML048W	4562.79	0.0585605	0.113903	0.514125	0.607165	0.998968
YBL064C	2206.74	-0.259481	0.230242	-1.12699	0.259746	0.998968
YIL045W	377.043	0.00798961	0.323862	0.0246698	0.980318	NA
YKL221W	14.9308	-0.463731	0.414779	-1.11802	0.263559	NA
YGL126W	1376.73	-0.357885	0.218135	-1.64066	0.100868	0.998968
YLR167W	32523.7	-0.051149	0.153665	-0.332861	0.739239	0.998968
YMR270C	731.922	0.0616055	0.107152	0.574935	0.565335	NA
YLR293C	7902.35	-0.0687919	0.132684	-0.518464	0.604135	0.998968
YLR228C	821.29	0.00120923	0.0740642	0.0163268	0.986974	NA
YJR053W	170.526	0.203529	0.159838	1.27335	0.202895	NA
YJL171C	2654.73	-0.0924456	0.197534	-0.467998	0.639786	0.998968
YDR374C	6.46803	0.123071	0.69442	0.177228	0.859329	NA
YKL021C	1388.56	0.0227427	0.164186	0.138518	0.889831	0.998968
YDL167C	1238.1	0.0565107	0.323198	0.174849	0.861198	0.998968
YLR388W	3646.35	-0.0582607	0.154438	-0.377244	0.705992	0.998968
YLR373C	933.098	0.187918	0.206066	0.911934	0.361803	NA
YKR001C	3459.92	0.0716573	0.0958583	0.747534	0.454742	0.998968
YKR054C	984.835	0.0301999	0.197722	0.152739	0.878604	0.998968
YIR034C	829.998	-0.201449	0.154108	-1.30719	0.191149	NA
YGL013C	930.985	0.197593	0.194813	1.01427	0.310455	NA
YJR068W	987.004	-0.0409136	0.0853792	-0.479198	0.631798	0.998968
YGR207C	1358.72	-0.0645549	0.106362	-0.606935	0.543894	0.998968
YDR212W	2674.95	0.0734854	0.11316	0.649396	0.516082	0.998968
YNL052W	3026.47	-0.505891	0.163916	-3.08628	0.00202676	0.0958069
YGL188C	304.122	-0.591539	0.273301	-2.16442	0.0304319	NA
YNL025C	275.378	0.0206648	0.19931	0.103682	0.917422	NA
YGR121W-A	3.88005	0.823196	0.738807	1.11422	0.265184	NA
YGR091W	354.349	-0.117802	0.133058	-0.885347	0.375969	NA
YDL232W	139.262	-0.0920616	0.208649	-0.441227	0.659049	NA
YPL119C	243.889	0.011694	0.212996	0.0549025	0.956216	NA
YLR242C	253.999	0.159658	0.309776	0.5154	0.606274	NA
YJR148W	1762.63	0.0413878	0.114242	0.36228	0.717143	0.998968
YJR082C	425.912	0.0256044	0.110612	0.231479	0.816942	NA
YOL087C	1946.55	0.0266219	0.169528	0.157035	0.875217	0.998968
YNL134C	8864.02	-0.143725	0.147221	-0.976248	0.328942	0.998968
YAL037W	104.266	-0.248615	0.2037	-1.2205	0.222277	NA
YGL146C	356.947	-0.0931767	0.142136	-0.655548	0.512115	NA
YBR262C	668.498	0.0300133	0.140527	0.213577	0.830877	NA
YPL199C	952.911	-0.0292602	0.0715725	-0.40882	0.682672	NA
YML101C-A	15.696	0.08333	0.437947	0.190274	0.849094	NA
YFL036W	1772.16	0.184439	0.111371	1.65608	0.0977048	0.998968
YDL209C	299.984	0.0894556	0.247304	0.361723	0.717559	NA
YIL051C	1494.17	-0.0875707	0.07664	-1.14262	0.253195	0.998968
YPL057C	2490.04	0.0698137	0.0872	0.800616	0.423354	0.998968
YNR010W	209.805	-0.0956436	0.170789	-0.56001	0.575473	NA
YDR365C	4554.77	0.0949898	0.196074	0.484459	0.628061	0.998968
YNL169C	2998.83	-0.0175834	0.105326	-0.166943	0.867415	0.998968
YFR034C	611.998	-0.0114095	0.137834	-0.0827769	0.934029	NA
YHR070W	820.195	-0.12885	0.225868	-0.570467	0.568361	NA
YDR460W	473.964	-0.0889006	0.123799	-0.718102	0.472694	NA
YNL112W	10108.2	-0.071318	0.29067	-0.245357	0.80618	0.998968
YHL047C	982.891	0.246112	0.191336	1.28628	0.198346	0.998968
YOR360C	942.958	0.0186851	0.254998	0.0732753	0.941587	NA
YOR335C	6366.65	0.048304	0.150025	0.321973	0.747474	0.998968
YGL251C	298.494	0.108761	0.160364	0.678215	0.497636	NA
YER156C	2971.85	-0.0719521	0.140484	-0.512175	0.608529	0.998968
YPL255W	530.06	0.0154384	0.100374	0.153809	0.87776	NA
YOR095C	1276.34	-0.0231523	0.189576	-0.122127	0.902799	0.998968
YEL038W	528.518	-0.204878	0.172715	-1.18622	0.235534	NA
YCL014W	758.118	0.0909052	0.191799	0.473959	0.635529	NA
YOL025W	416.952	-0.145186	0.135985	-1.06766	0.285673	NA
YPL208W	646.847	0.095038	0.0879453	1.08065	0.279854	NA
YOL147C	571.959	-0.10757	0.151067	-0.712068	0.476423	NA
YNL280C	1126.49	0.0372467	0.0852892	0.436711	0.662321	0.998968
YDR007W	928.675	0.00606367	0.136414	0.0444504	0.964545	NA
YIL160C	70.2977	-0.683304	0.204377	-3.34336	0.000827705	NA
YPR089W	1290.66	0.148225	0.18672	0.793838	0.427289	0.998968
YBR233W	660.266	-0.14926	0.137238	-1.0876	0.276773	NA
YPL122C	487.892	0.0440149	0.201197	0.218765	0.826833	NA
YKL104C	3870.47	-0.121533	0.118501	-1.02558	0.305091	0.998968
YMR313C	798.172	0.0167071	0.0832851	0.200602	0.84101	NA
YGL179C	421.705	-0.27395	0.216471	-1.26553	0.205683	NA
YGR120C	308.167	0.179249	0.160573	1.11631	0.264289	NA
YML001W	1400.59	0.00755991	0.0935499	0.0808116	0.935592	0.998968
YLL028W	401.605	-0.0606899	0.232735	-0.260768	0.794271	NA
YER016W	916.184	0.00345528	0.0869842	0.0397231	0.968314	NA
YHR061C	438.67	0.111328	0.138715	0.802566	0.422225	NA
YDR438W	286.603	0.0785806	0.146319	0.53705	0.591233	NA
YNL211C	78.3819	0.416514	0.356817	1.1673	0.243089	NA
YLR124W	2.6087	0.643243	0.99675	0.64534	0.518707	NA
YML058W-A	17.1656	-0.110007	0.472729	-0.232707	0.815989	NA
YLR026C	832.157	-0.029018	0.10152	-0.285836	0.775004	NA
YJR065C	3822.48	-0.081871	0.131883	-0.620787	0.53474	0.998968
YDL131W	3145.14	-0.162176	0.126225	-1.28481	0.198858	0.998968
YMR095C	14.053	-0.284435	0.452573	-0.628484	0.529687	NA
YER138C	24417.1	0.0520868	0.235441	0.221231	0.824913	0.998968
YDL033C	286.958	-0.0482773	0.118292	-0.408121	0.683185	NA
YMR255W	841.35	-0.0142953	0.124574	-0.114753	0.908641	NA
YHR209W	254.959	0.0866428	0.185947	0.465955	0.641248	NA
YGL247W	210.985	-0.131087	0.121455	-1.0793	0.280454	NA
YCR100C	105.905	-0.208192	0.194419	-1.07084	0.28424	NA
YDR516C	3232.28	-0.0172113	0.509199	-0.0338007	0.973036	0.998968
Q0130	2.89044	-1.34092	1.02488	-1.30837	0.190749	NA
YPL233W	462.675	-0.0561486	0.107441	-0.522598	0.601254	NA
YOR255W	1.99401	-1.15628	1.11595	-1.03614	0.300139	NA
YOR063W	47926.8	-0.0894765	0.156878	-0.570357	0.568435	0.998968
YGR251W	320.427	0.0262532	0.20653	0.127116	0.898849	NA
YPR047W	375.18	0.0858039	0.186214	0.460782	0.644955	NA
YDR246W-A	13.1275	0.262157	0.4161	0.630033	0.528673	NA
YDR044W	733.224	-0.00440973	0.123232	-0.035784	0.971455	NA
YEL016C	657.844	0.0721457	0.0734531	0.982201	0.326001	NA
YAL027W	282.637	-0.0282749	0.11512	-0.245612	0.805982	NA
YKL153W	14.8684	-0.47175	0.596836	-0.790419	0.429283	NA
YFL019C	7.34211	-0.20865	0.698007	-0.298922	0.764999	NA
YMR139W	853.008	-0.024356	0.196747	-0.123793	0.901479	NA
YDL080C	756.71	-0.196022	0.0953649	-2.0555	0.0398311	NA
YOR172W	631.034	0.0391566	0.158318	0.247329	0.804654	NA
YOR105W	145.78	0.203769	0.251986	0.80865	0.418716	NA
YJL138C	12690.8	-0.00898861	0.139644	-0.0643679	0.948677	0.998968
YPR143W	1028.75	0.139732	0.198745	0.703073	0.48201	0.998968
YDR340W	189.084	0.726721	0.724964	1.00242	0.316139	NA
YNL322C	2409.07	-0.12539	0.132016	-0.949808	0.34221	0.998968
YPL090C	15294.9	-0.0974534	0.190511	-0.511537	0.608975	0.998968
YPR078C	2.77373	-1.23235	1.00159	-1.2304	0.218548	NA
YCR075C	382.771	-0.0233861	0.159288	-0.146817	0.883277	NA
YFL062W	6.12821	-0.0857619	1.03931	-0.0825178	0.934235	NA
YDR171W	2866.4	0.267271	0.643153	0.415564	0.677729	0.998968
YLR439W	874.229	-0.134989	0.148501	-0.909009	0.363345	NA
YCR020C	116.996	-0.278154	0.191695	-1.45102	0.146773	NA
YDR450W	10861.3	-0.0884672	0.166992	-0.529769	0.596272	0.998968
YCL051W	932.736	-0.123816	0.152534	-0.811722	0.416951	NA
YCR097W	666.489	0.384413	0.234914	1.6364	0.101757	NA
YBL039C-A	4.4807	0.00888475	1.14254	0.00777632	0.993795	NA
YDR235W	664.117	0.276195	0.326084	0.847004	0.396993	NA
YGL194C-A	98.0977	0.0640662	0.23568	0.271835	0.785749	NA
YER038C	212.248	0.0757956	0.21596	0.350971	0.72561	NA
YPR125W	1001.03	-0.0390711	0.160889	-0.242845	0.808126	0.998968
YHR049W	2409.93	0.0818718	0.124739	0.656347	0.511601	0.998968
YBR007C	660.403	0.0518211	0.0933357	0.555212	0.57875	NA
YPL001W	368.071	0.129038	0.157426	0.819674	0.412402	NA
YJL038C	3.41518	-0.112956	0.791891	-0.14264	0.886574	NA
YNL319W	7.46585	0.445445	0.809542	0.550243	0.582153	NA
YPR178W	491.026	-0.146231	0.111013	-1.31724	0.187758	NA
YDR475C	787.699	-0.0653224	0.139046	-0.469789	0.638506	NA
TLC1	1249.81	0.168854	0.173529	0.973059	0.330524	0.998968
YNL159C	408.212	0.0652431	0.183873	0.354828	0.722719	NA
YAL014C	628.116	-0.207686	0.113046	-1.83718	0.0661833	NA
YCR020W-B	174.279	0.276724	0.263385	1.05065	0.293421	NA
YBR243C	1044.35	-0.0195159	0.0774197	-0.252079	0.80098	0.998968
YLR181C	549.846	0.0372263	0.0929471	0.400511	0.68878	NA
YBL056W	2733.61	0.171133	0.0986152	1.73536	0.0826777	0.998968
YNL075W	1052.57	0.0245239	0.242176	0.101265	0.91934	0.998968
YPL150W	860.462	-0.0769198	0.109689	-0.701254	0.483144	NA
YJL012C	2037.25	0.014086	0.0708291	0.198873	0.842362	0.998968
YJL065C	456.53	-0.125026	0.115709	-1.08052	0.279913	NA
YKR020W	329.833	-0.0701573	0.118929	-0.589909	0.555252	NA
YMR053C	201.158	0.0351352	0.362996	0.0967923	0.922891	NA
YKL066W	389.899	-0.0357907	0.184	-0.194514	0.845773	NA
YMR004W	1037.9	0.0450018	0.108826	0.413522	0.679224	0.998968
YER083C	1238.34	-0.0965086	0.123772	-0.779729	0.43555	0.998968
YPL176C	1158.71	0.0213696	0.0761188	0.28074	0.77891	0.998968
YHR172W	371.356	0.291464	0.166382	1.75177	0.0798131	NA
YLR263W	285.85	0.0697666	0.198663	0.351181	0.725453	NA
YDL240W	1342.46	0.172173	0.12436	1.38448	0.166213	0.998968
YDR401W	13.1561	-0.168418	0.394007	-0.427449	0.669052	NA
YHR013C	993.4	-0.0563865	0.111682	-0.504882	0.613641	0.998968
YOL040C	15405.5	-0.0823683	0.13614	-0.605024	0.545163	0.998968
YGR072W	609.064	0.0529509	0.173679	0.304877	0.76046	NA
YCL035C	1560.19	-0.0786073	0.192961	-0.407373	0.683734	0.998968
YIL023C	695.642	-0.113565	0.141115	-0.804768	0.420953	NA
YNR073C	59.7033	0.031594	0.31301	0.100936	0.919601	NA
YPR200C	50.0045	0.106857	0.23756	0.449809	0.652848	NA
YIL072W	61.4696	-0.0808255	0.27826	-0.290468	0.771458	NA
YLR327C	3640.62	0.0239808	0.244886	0.0979261	0.921991	0.998968
YBR229C	1135.97	-0.0507029	0.11671	-0.434436	0.663972	0.998968
YML133C	324.412	-0.0360193	0.237775	-0.151485	0.879593	NA
YOR131C	534.109	-0.0659523	0.172766	-0.381743	0.702652	NA
YLR455W	616.318	0.245339	0.0834057	2.94151	0.00326616	NA
YNL247W	3996.52	0.0947089	0.144539	0.655249	0.512307	0.998968
YOR054C	633.903	-0.106789	0.227609	-0.469178	0.638943	NA
YGL007C-A	8.30149	-0.147333	0.517905	-0.28448	0.776043	NA
YFR028C	1026.32	0.00955318	0.101767	0.0938728	0.92521	0.998968
YOR009W	271	-0.187829	0.139691	-1.34461	0.178751	NA
YOR072W	9.05965	0.879902	0.55892	1.57429	0.115421	NA
YDR292C	1803.05	0.0394431	0.100435	0.392721	0.694526	0.998968
YOR161C-C	5.66114	0.306324	0.662556	0.462337	0.643839	NA
YHR126C	3.56282	-0.570475	0.875165	-0.651848	0.514499	NA
YMR194W	2592.02	-0.188101	0.208855	-0.900628	0.367786	0.998968
YAL016C-A	2.47985	-0.145898	0.984439	-0.148204	0.882181	NA
YMR167W	403.147	-0.0608804	0.120808	-0.503943	0.614301	NA
YOR249C	407.842	0.147304	0.254523	0.578746	0.562761	NA
YER117W	9243.95	-0.00501006	0.188384	-0.0265949	0.978783	0.998968
YOR301W	509.419	-0.197012	0.157338	-1.25215	0.210513	NA
YPL187W	10.7184	0.496855	0.56615	0.877604	0.380159	NA
YKL218C	704.352	-0.151028	0.17972	-0.840355	0.400709	NA
YOR140W	1358.51	0.08679	0.166172	0.522289	0.601469	0.998968
YDR391C	662.078	-0.272708	0.259332	-1.05158	0.292992	NA
YLL063C	182.901	-0.382345	0.164481	-2.32455	0.0200958	NA
YOR276W	2496.02	0.0865762	0.0717033	1.20742	0.22727	0.998968
YMR309C	4037.14	0.220356	0.314556	0.700529	0.483597	0.998968
YOR089C	1319.3	-0.0514614	0.144145	-0.357012	0.721083	0.998968
tD(GUC)N	7.11962	-1.10121	0.684057	-1.60982	0.107438	NA
YGR258C	745.46	-0.0286163	0.100978	-0.283391	0.776877	NA
YNL146C-A	18.5367	0.41449	0.435965	0.950742	0.341735	NA
YMR180C	340.246	-0.236414	0.137122	-1.72412	0.0846869	NA
YGL163C	588.627	0.11749	0.099631	1.17925	0.238297	NA
YDR417C	7.42583	-0.976169	0.673845	-1.44865	0.147434	NA
YOL131W	2.24346	0.270734	0.915942	0.29558	0.767551	NA
YPL283C	1434.89	0.136502	0.22656	0.602498	0.546842	0.998968
YBL021C	298.156	-0.122449	0.117546	-1.04172	0.297543	NA
YHR215W	161.407	-0.308038	0.183203	-1.6814	0.0926853	NA
YLL045C	17985.1	-0.0644802	0.16404	-0.393077	0.694263	0.998968
YLR156W	23.2169	-0.401816	0.357613	-1.1236	0.261181	NA
YLR007W	536.186	-0.178	0.144905	-1.22839	0.219299	NA
YNL261W	398.561	-0.0965143	0.195785	-0.49296	0.622041	NA
YNL305C	836.397	-0.204767	0.20836	-0.982753	0.325729	NA
YJL046W	442.266	0.17563	0.153965	1.14071	0.25399	NA
YKR078W	404.602	0.0791132	0.182929	0.432479	0.665393	NA
YOR191W	1342.86	0.105439	0.11318	0.931601	0.351543	0.998968
YEL074W	59.7555	-0.245118	0.227342	-1.07819	0.280949	NA
YDR272W	1209.13	-0.145578	0.166825	-0.872641	0.382859	0.998968
YGR289C	791.291	-0.0682493	0.17082	-0.399539	0.689496	NA
YML020W	621.598	0.0949357	0.143964	0.65944	0.509613	NA
YLR103C	401.819	0.178372	0.115664	1.54215	0.123036	NA
YOR294W	987.61	0.0152767	0.283669	0.0538541	0.957051	0.998968
YEL062W	314.052	-0.0116096	0.142519	-0.0814601	0.935076	NA
YPR064W	3.62729	0.348343	0.760127	0.458269	0.646759	NA
YPR031W	562.421	0.0510359	0.202142	0.252476	0.800673	NA
YLR038C	1942.79	-0.352344	0.0967907	-3.64027	0.000272355	0.0220705
YNL096C	4652.04	-0.101036	0.196373	-0.514512	0.606894	0.998968
YDR038C	1713.5	-0.0709356	0.0771431	-0.919532	0.357817	0.998968
YDL187C	9.93105	-0.292168	0.482605	-0.605398	0.544915	NA
YBR024W	332.526	-0.12888	0.190679	-0.675899	0.499105	NA
YER171W	1023.13	0.0252113	0.178783	0.141016	0.887857	0.998968
YDL047W	1582.36	-0.0870018	0.161078	-0.540123	0.589113	0.998968
YML046W	724.317	0.187374	0.281133	0.666497	0.505094	NA
YGL124C	482.46	-0.0232796	0.153936	-0.151229	0.879795	NA
YMR276W	2470.19	-0.0775056	0.126572	-0.612345	0.54031	0.998968
YEL059W	9.83856	-0.530841	0.478823	-1.10864	0.267587	NA
YDL160C-A	103.621	-0.135855	0.167676	-0.81022	0.417814	NA
YLR165C	272.245	0.00895078	0.169657	0.052758	0.957925	NA
YCR069W	1412.03	-0.123035	0.14223	-0.865042	0.387016	0.998968
YGR146C-A	4.07754	-0.0675487	0.761745	-0.0886763	0.929339	NA
YKL027W	978.955	-0.026259	0.181994	-0.144285	0.885275	NA
YJL173C	544.418	-0.0487701	0.096754	-0.504063	0.614217	NA
YDR152W	1457.63	0.115378	0.137875	0.836829	0.402689	0.998968
YKL127W	2335.85	-0.189375	0.0878636	-2.15533	0.0311357	0.611235
YDR309C	3985.06	-0.179442	0.174422	-1.02879	0.303581	0.998968
YLR386W	736.819	0.0796612	0.111475	0.71461	0.47485	NA
YLR371W	1367.08	0.160621	0.089798	1.78869	0.0736641	0.998968
YDL169C	258.609	-0.0427455	0.28609	-0.149413	0.881228	NA
YLR092W	283.601	-0.178479	0.144059	-1.23893	0.215372	NA
YER044C	474.934	0.333932	0.186257	1.79286	0.0729949	NA
YMR072W	2487.82	-0.0438443	0.113147	-0.387499	0.698387	0.998968
YJR033C	810.499	-0.0090883	0.149707	-0.0607073	0.951592	NA
YKR056W	1436.96	0.0164025	0.299587	0.0547501	0.956338	0.998968
YGL011C	2626.19	-0.0571383	0.111293	-0.513405	0.607668	0.998968
YIR036C	635.087	-0.236199	0.195362	-1.20903	0.22665	NA
YMR123W	726.151	-0.0385179	0.0877852	-0.438775	0.660825	NA
YDR406W	1323.61	0.785194	0.264742	2.96588	0.00301817	0.129212
YGR073C	59.5044	0.127749	0.187793	0.680265	0.496337	NA
YGR209C	3024.53	-0.015943	0.175836	-0.0906696	0.927755	0.998968
YJL150W	2.56663	0.623171	1.00904	0.617588	0.536847	NA
tS(UGA)E	4.59451	0.871302	0.643254	1.35452	0.17557	NA
YNL050C	502.058	-0.0069182	0.186265	-0.0371418	0.970372	NA
YMR304C-A	2132.31	-0.0312845	0.179366	-0.174417	0.861538	0.998968
YLR240W	619.004	0.0164167	0.0871194	0.188439	0.850532	NA
YGR093W	683.338	-0.0211629	0.168684	-0.125459	0.90016	NA
YDL234C	2276.47	-0.0373673	0.252268	-0.148125	0.882244	0.998968
YNL136W	735.349	-0.00493481	0.0951041	-0.0518885	0.958618	NA
YKL049C	425.817	0.0797008	0.113279	0.703578	0.481695	NA
YJR080C	1236.54	-0.103908	0.0690607	-1.50459	0.13243	0.998968
YNR038W	885.139	0.0629053	0.310102	0.202854	0.839249	NA
YGL140C	1448.73	0.0890121	0.134593	0.661344	0.508392	0.998968
YCL029C	721.393	-0.0876099	0.112116	-0.78142	0.434555	NA
YFL038C	4737.82	-0.0822612	0.133482	-0.616273	0.537714	0.998968
YJR131W	535.12	-0.0242309	0.097108	-0.249526	0.802954	NA
YNR012W	736.734	-0.0232894	0.272185	-0.0855645	0.931813	NA
YNL110C	1481.69	0.129791	0.242137	0.536021	0.591944	0.998968
YDR367W	417.591	0.199189	0.236731	0.841416	0.400115	NA
YIL053W	6661.33	-0.321993	0.147621	-2.18122	0.0291669	0.590891
YPL059W	889.083	0.0261102	0.109586	0.238262	0.811678	NA
YGL253W	21013.8	0.207563	0.115025	1.80451	0.0711519	0.998968
YHL032C	2129.62	-0.176319	0.136432	-1.29236	0.196232	0.998968
YJL010C	1096.67	0.143176	0.284394	0.50344	0.614655	0.998968
YHL045W	2.15877	0.159791	0.94419	0.169236	0.865611	NA
YOR337W	691.998	-0.081558	0.318333	-0.256203	0.797794	NA
YMR010W	946.675	0.246226	0.240459	1.02398	0.305844	NA
YOR097C	267.538	-0.0959656	0.144157	-0.665702	0.505602	NA
YHR118C	274.254	-0.071124	0.19052	-0.373316	0.708913	NA
YGR024C	871.676	0.203889	0.173431	1.17562	0.239747	NA
YOL023W	628.464	0.236836	0.0941552	2.51538	0.0118904	NA
YPL253C	286.891	0.195295	0.149937	1.30251	0.192742	NA
YER154W	1783.79	-0.0335879	0.111123	-0.302257	0.762456	0.998968
YBR300C	2.44772	-0.692658	0.979303	-0.707297	0.479382	NA
YEL036C	2220.34	-0.066313	0.152073	-0.436061	0.662792	0.998968
YBR260C	753.219	-0.00611277	0.0812702	-0.0752154	0.940043	NA
YPL124W	184.548	0.102893	0.138149	0.744798	0.456394	NA
YAL042W	3748.98	-0.0876258	0.129331	-0.677532	0.498069	0.998968
YAL035W	5449.15	0.108705	0.172543	0.630019	0.528682	0.998968
YNL286W	487.651	-0.0284677	0.0834743	-0.341035	0.733077	NA
YDR001C	2208.6	-0.120801	0.249378	-0.48441	0.628095	0.998968
YIL162W	2132.65	0.234173	0.148291	1.57914	0.114304	0.998968
YOL141W	189.374	0.0989683	0.31121	0.318012	0.750476	NA
YHR145C	68.4278	0.193643	0.588927	0.328807	0.742302	NA
YBR195C	408.025	-0.145015	0.167202	-0.867304	0.385776	NA
YIL039W	2150.73	0.00187193	0.0897999	0.0208456	0.983369	0.998968
YGR122W	622.122	-0.0453043	0.164117	-0.276049	0.782511	NA
YPL092W	872.845	-0.0017935	0.181752	-0.00986785	0.992127	NA
YGR161C-D	537.646	-0.137814	0.445268	-0.309508	0.756935	NA
YMR315W	1867.63	-0.221142	0.212522	-1.04056	0.29808	0.998968
YGR213C	46.8608	0.314456	0.376821	0.834497	0.404001	NA
YDR384C	844.89	0.126717	0.171964	0.736882	0.461194	NA
YML007W	2283.76	0.133752	0.0820093	1.63094	0.102904	0.998968
YER063W	1454.28	-0.0376714	0.117816	-0.319748	0.74916	0.998968
YDR481C	1879.27	-0.0987811	0.150606	-0.65589	0.511895	0.998968
YER014W	504.588	-0.118435	0.109109	-1.08547	0.277715	NA
YPR041W	4318.51	0.0541723	0.151962	0.356487	0.721476	0.998968
YNL213C	559.163	0.139277	0.110753	1.25755	0.208554	NA
YKL006C-A	312.852	0.051743	0.184864	0.279897	0.779556	NA
YBR058C	1341.64	0.033831	0.102765	0.329207	0.741999	0.998968
YLR024C	395.145	0.141221	0.293479	0.481195	0.630378	NA
YLR071C	1287.86	0.190641	0.220489	0.864628	0.387243	0.998968
YHR092C	123.93	-0.0218876	0.166999	-0.131064	0.895724	NA
YDL199C	253	-0.147002	0.311019	-0.472646	0.636466	NA
YHL007C	2171.18	0.0389158	0.190176	0.204631	0.837861	0.998968
YNL228W	4.36945	-0.349933	0.735217	-0.475959	0.634104	NA
YDL064W	708.478	0.0344591	0.0996933	0.345651	0.729605	NA
YDL031W	2104.35	0.178554	0.266536	0.669907	0.502917	0.998968
YMR257C	583.251	0.352503	0.257252	1.37026	0.170606	NA
YDR046C	3016.61	-0.0695283	0.0992948	-0.700221	0.483789	0.998968
YOR253W	569.343	0.107579	0.145897	0.737363	0.460901	NA
YOR202W	675.136	-0.202808	0.14286	-1.41962	0.155718	NA
YGL245W	7806.71	-0.0289225	0.0855007	-0.338272	0.735158	0.998968
YGR006W	169.504	-0.0193065	0.150574	-0.128219	0.897975	NA
YGR079W	720.328	-0.242748	0.629287	-0.38575	0.699682	NA
YDL119C	236.766	-0.0016276	0.193759	-0.00840011	0.993298	NA
YKL151C	761.566	-0.241673	0.269153	-0.897899	0.369239	NA
YGL198W	1038.55	-0.207007	0.187913	-1.10161	0.270631	0.998968
YDL086W	1111.55	-0.0479297	0.140903	-0.340161	0.733735	0.998968
YBL091C-A	272.267	-0.161251	0.229603	-0.702302	0.482491	NA
YLR361C-A	177.59	0.0147102	0.153641	0.0957443	0.923724	NA
YHR038W	331.336	0.173329	0.156288	1.10904	0.267414	NA
YML069W	2421.56	0.0780689	0.0743092	1.0506	0.293444	0.998968
YKR019C	344.08	-0.134173	0.131773	-1.01822	0.308575	NA
YJR073C	9248.46	-0.0541849	0.19155	-0.282876	0.777272	0.998968
YGR279C	13334.5	-0.0190373	0.123121	-0.154623	0.877119	0.998968
YCR073C	434.498	0.254703	0.225263	1.13069	0.258187	NA
YCR022C	8.89941	0.328469	0.510472	0.643462	0.519924	NA
YLL015W	1327.12	0.123265	0.16296	0.756412	0.449402	0.998968
YNL195C	45.6669	-0.481793	0.381015	-1.2645	0.206051	NA
YDL134C	2019.9	-0.00114152	0.092357	-0.0123599	0.990138	0.998968
YFL060C	176.884	0.0807837	0.138861	0.581761	0.560728	NA
YDR173C	206.243	-0.11769	0.135935	-0.865784	0.386609	NA
YMR100W	655.775	0.184679	0.162375	1.13736	0.255388	NA
YCL057W	2486.66	-0.0596512	0.0750653	-0.794658	0.426812	0.998968
YBR072W	437.224	0.0952939	0.297589	0.32022	0.748802	NA
YBR005W	821.888	-0.312611	0.299394	-1.04415	0.296418	NA
YPR123C	39.7924	-0.760902	0.25838	-2.94489	0.0032307	NA
RUF5-2	1267.82	1.43851	0.438148	3.28315	0.00102653	0.068506
YDL173W	1544.35	-0.108457	0.157541	-0.688436	0.491178	0.998968
YJR047C	20.299	0.368319	0.436036	0.844699	0.398279	NA
YMR006C	2676.53	0.491311	0.191147	2.57033	0.0101602	0.311534
YKL145W-A	24.3201	-0.587894	0.851189	-0.690674	0.48977	NA
YAL016W	2701.46	0.0454088	0.0841335	0.539724	0.589388	0.998968
YMR292W	504.38	0.281902	0.251019	1.12303	0.261425	NA
YHR011W	283.16	0.113934	0.0993837	1.14641	0.251626	NA
YPL152W	319.14	-0.0540198	0.131685	-0.410221	0.681644	NA
YLR183C	1014.44	0.109836	0.109088	1.00686	0.314004	0.998968
YNL077W	784.772	0.369667	0.116498	3.17316	0.00150791	NA
YBR109C	2190.77	-0.0441485	0.0868459	-0.508355	0.611205	0.998968
YBR172C	1915.89	0.0355602	0.272315	0.130585	0.896104	0.998968
YDR346C	2833.78	0.0511188	0.111134	0.459974	0.645535	0.998968
YAR002C-A	2888.36	-0.00316206	0.0695563	-0.0454604	0.96374	0.998968
YOL077W-A	1816.26	-0.241138	0.144355	-1.67045	0.0948309	0.998968
YPL029W	477.918	0.139029	0.146972	0.945951	0.344174	NA
YHR146W	2793.63	-0.0430706	0.133924	-0.321604	0.747753	0.998968
YDL242W	2.62648	-0.404521	0.937969	-0.431273	0.66627	NA
YBR189W	17184.4	-0.0830331	0.154413	-0.537732	0.590762	0.998968
YER085C	5.60129	-0.60785	0.779744	-0.779551	0.435655	NA
YJL225C	2159.74	-0.188578	0.193611	-0.974004	0.330054	0.998968
YKL064W	1683	0.0585689	0.125818	0.465504	0.641571	0.998968
YLR265C	468.36	0.147342	0.251863	0.585008	0.558543	NA
YKR022C	569.217	0.0647744	0.102475	0.632099	0.527322	NA
YLR287C	679.818	0.104627	0.224696	0.465637	0.641475	NA
YPL174C	577.221	0.236563	0.259767	0.910675	0.362467	NA
YOR070C	816.51	-0.0438042	0.129384	-0.338559	0.734942	NA
YDR403W	82.528	0.0558866	0.293216	0.190599	0.84884	NA
YOL093W	541.854	0.0267994	0.214675	0.124837	0.900652	NA
YOL042W	490.954	0.0750794	0.0911836	0.823387	0.410288	NA
YIL070C	1318.19	0.207062	0.0826251	2.50604	0.012209	0.364504
YCL037C	24.7624	0.0588297	0.419705	0.140169	0.888526	NA
YIL025C	1.87712	0.58289	1.37743	0.423171	0.67217	NA
YDR545C-A	19.9937	-0.1236	0.694683	-0.177923	0.858784	NA
YNR071C	37.951	0.133624	0.270248	0.494448	0.62099	NA
YML131W	1008.02	-0.052509	0.125981	-0.4168	0.676825	0.998968
YNL245C	342.589	-0.202194	0.144149	-1.40267	0.160714	NA
YNR024W	397.745	-0.0193518	0.221474	-0.0873773	0.930372	NA
YFL013W-A	3.84211	0.472027	0.797178	0.592123	0.553768	NA
YLR329W	24.4954	0.201591	0.372292	0.541487	0.588172	NA
YPL043W	1966.82	0.136106	0.292023	0.466081	0.641157	0.998968
YCL045C	3280.09	0.0640997	0.0660081	0.971088	0.331504	0.998968
YBR056C-B	1.18066	0.583069	1.54388	0.377666	0.705679	NA
YKL002W	1402.08	-0.0320949	0.131234	-0.244563	0.806795	0.998968
YDR328C	1764.23	-0.09026	0.150394	-0.600158	0.548401	0.998968
YIR009W	122.63	-0.13882	0.139556	-0.994722	0.319872	NA
YBR154C	1820.4	0.0661732	0.145122	0.455983	0.648403	0.998968
YLR001C	737.896	0.0127738	0.143569	0.0889732	0.929103	NA
YKR101W	256.25	0.0784547	0.158609	0.494642	0.620853	NA
YMR230W-A	4.67052	-0.171501	0.826826	-0.207422	0.835681	NA
YER115C	359.087	-0.018851	0.0969481	-0.194444	0.845828	NA
YHR124W	111.322	0.427393	0.201044	2.12587	0.0335144	NA
YER148W	1783.75	0.00414667	0.0974902	0.0425342	0.966073	0.998968
YMR240C	403.683	-0.0703914	0.098253	-0.71643	0.473726	NA
YOR303W	3404.4	0.00664356	0.14301	0.0464551	0.962948	0.998968
YIL087C	308.443	-0.193779	0.224785	-0.86206	0.388655	NA
YMR192W	575.985	0.0326692	0.16565	0.197218	0.843657	NA
YJL221C	219.901	0.0862403	0.126578	0.68132	0.495669	NA
YMR229C	3748.27	0.177048	0.291164	0.60807	0.543141	0.998968
YLL038C	390.694	0.0203426	0.111125	0.183062	0.85475	NA
YOR056C	1566.74	-0.0772188	0.244936	-0.315261	0.752563	0.998968
YOL108C	462.829	-0.0122337	0.184905	-0.066162	0.947249	NA
YOR270C	6270.08	0.1097	0.100794	1.08836	0.276437	0.998968
YDR106W	27.3294	0.12983	0.291847	0.444855	0.656424	NA
YOL068C	1565.55	0.0737411	0.0900575	0.818823	0.412888	0.998968
YMR182C	291.478	0.0254213	0.197376	0.128796	0.897519	NA
YBR201W	421.326	-0.290162	0.171475	-1.69215	0.0906175	NA
YLL043W	2024.81	0.0555647	0.0699206	0.794683	0.426798	0.998968
YDR415C	571.86	-0.0524306	0.10297	-0.509181	0.610625	NA
YGL161C	1234.04	-0.0404388	0.154586	-0.261594	0.793634	0.998968
YOL133W	363.15	-0.197918	0.158873	-1.24576	0.212852	NA
YDL074C	1388.54	0.157988	0.177321	0.890973	0.372944	0.998968
YNL263C	1193.46	-0.0380487	0.0686019	-0.554631	0.579147	0.998968
YHR217C	13.4176	-0.731007	0.448396	-1.63027	0.103044	NA
YDR128W	1133.42	0.0503876	0.123341	0.408522	0.682891	0.998968
YOR193W	219.301	0.134461	0.260345	0.516474	0.605523	NA
YER028C	45.604	-0.10082	0.245176	-0.411216	0.680914	NA
YMR052W	145.834	0.142406	0.23969	0.594124	0.552429	NA
YMR294W-A	3.80151	-0.292057	1.01965	-0.286428	0.77455	NA
YKR076W	558.865	0.00854019	0.168015	0.05083	0.959461	NA
YDR225W	8230.56	-0.000570398	0.19365	-0.00294551	0.99765	0.998968
YDR270W	925.947	0.251472	0.178177	1.41136	0.158138	NA
tL(UAG)J	11.9676	0.411378	0.445968	0.922438	0.3563	NA
YPR033C	4112.25	0.0515981	0.112389	0.459102	0.646161	0.998968
YGR230W	216.686	-0.187814	0.109924	-1.70857	0.0875301	NA
YPR062W	1412.04	0.0271328	0.117551	0.230818	0.817456	0.998968
YDR528W	522.793	0.00060067	0.159024	0.00377722	0.996986	NA
YER173W	460.509	-0.00420388	0.0925256	-0.0454348	0.963761	NA
YBR026C	1421.22	-0.0395744	0.132515	-0.29864	0.765215	0.998968
YDL185W	8256.21	0.0720651	0.0858236	0.839689	0.401083	0.998968
YBR091C	174.554	-0.0117603	0.178449	-0.0659027	0.947455	NA
YNL094W	1240.22	-0.0474585	0.0951183	-0.498941	0.617821	0.998968
YGL056C	1972.47	-0.00154535	0.215186	-0.00718146	0.99427	0.998968
YPL227C	738.854	0.0797126	0.119285	0.668255	0.503971	NA
YLR222C-A	18.3198	0.106506	0.684887	0.155508	0.87642	NA
YDL010W	782.341	0.0153974	0.164948	0.0933471	0.925628	NA
YML019W	735.618	0.164295	0.141862	1.15814	0.246808	NA
YDL045C	737.195	0.00485107	0.090294	0.0537252	0.957154	NA
YLR163C	978.803	0.106419	0.083849	1.26917	0.20438	NA
YLR178C	778.286	-0.502549	0.555771	-0.904238	0.365869	NA
YHL002C-A	2.01698	-0.0200619	0.981715	-0.0204356	0.983696	NA
YBL079W	1522.79	0.147365	0.273022	0.539754	0.589366	0.998968
YNL056W	518.013	0.0247029	0.142649	0.173172	0.862516	NA
YFL001W	632.789	0.0135791	0.152938	0.0887881	0.92925	NA
YDR150W	2073.42	0.0748372	0.15572	0.480588	0.630809	0.998968
YER147C-A	8.21926	-0.992091	0.813912	-1.21892	0.222876	NA
YKL170W	546.879	-0.00837669	0.145839	-0.057438	0.954196	NA
YPR157W	118.484	-0.158537	0.226856	-0.698843	0.48465	NA
YPR137C-B	854.172	-0.615414	2.26792	-0.271356	0.786117	NA
YLR384C	2817.52	0.150027	0.19377	0.774252	0.438782	0.998968
YPL060W	286.006	0.0853938	0.149958	0.569453	0.569049	NA
YML099C	961.989	0.183245	0.108426	1.69004	0.0910199	NA
YLR421C	1021.75	0.0534322	0.105755	0.505245	0.613387	0.998968
YLR090W	578.726	0.224825	0.133561	1.68331	0.0923151	NA
YJR064W	3437.81	0.0162031	0.119455	0.135642	0.892104	0.998968
YML022W	2017.06	0.0897637	0.105228	0.85304	0.393637	0.998968
YER046W	282.298	-0.117146	0.192051	-0.609973	0.54188	NA
YMR029C	1077.96	0.125136	0.154721	0.808787	0.418638	0.998968
YIR030C	95.9828	-0.216143	0.309691	-0.697931	0.485221	NA
YKR050W	620.818	-0.110758	0.0775809	-1.42765	0.153393	NA
YMR121C	626.797	-0.174295	0.175613	-0.992498	0.320955	NA
YGL017W	406.702	-0.069996	0.124258	-0.563312	0.573222	NA
YDL150W	974.177	-0.0330414	0.26047	-0.126853	0.899057	NA
YNL038W	495.637	0.360218	0.212162	1.69784	0.0895379	NA
YHR001W-A	1300.87	-0.363122	0.111744	-3.24957	0.00115579	0.0733256
YOL165C	3.93324	-0.365046	0.726656	-0.502365	0.615411	NA
YIL139C	224.404	0.152207	0.221231	0.688003	0.491451	NA
YLR246W	543.277	0.0960245	0.111689	0.85975	0.389927	NA
YJR119C	314.705	0.108458	0.228353	0.474958	0.634817	NA
YLR359W	5699.64	-0.0912678	0.1432	-0.637344	0.523901	0.998968
YLR199C	717.593	-0.0124286	0.0956594	-0.129926	0.896625	NA
YJL206C	304.547	0.0473822	0.15747	0.300896	0.763494	NA
YIL142W	3497.83	-0.0151258	0.104946	-0.144129	0.885399	0.998968
YGL082W	1132.87	0.00794254	0.1642	0.0483712	0.96142	0.998968
YNL138W	3327.83	-0.0138491	0.0703737	-0.196794	0.843989	0.998968
YOR133W	24603.4	-0.0566925	0.106001	-0.53483	0.592768	0.998968
21S_rRNA	44.4766	0.452873	0.322307	1.4051	0.159992	NA
YGL142C	631.241	0.0622936	0.145704	0.427534	0.66899	NA
YGR179C	371.222	0.0517907	0.103239	0.501659	0.615907	NA
YGR102C	378.261	-0.128122	0.12239	-1.04683	0.295178	NA
YBR139W	1538.54	-0.0404208	0.27591	-0.1465	0.883527	0.998968
YHR188C	2302.31	-0.0621946	0.107941	-0.576189	0.564487	0.998968
YNL116W	669.051	-0.075365	0.175517	-0.429389	0.66764	NA
YNL139C	1012.26	0.0549236	0.243005	0.226018	0.821187	0.998968
YDR361C	1131.38	0.0192586	0.150722	0.127776	0.898326	0.998968
YLR445W	1.53761	-0.507803	1.21508	-0.417918	0.676007	NA
YGL255W	1784.8	-0.111031	0.219349	-0.506184	0.612727	0.998968
YFR007W	344.828	0.0184784	0.111816	0.165257	0.868742	NA
YLR333C	2945.01	-0.101652	0.198189	-0.512903	0.608019	0.998968
YHR103W	1462.63	0.0490688	0.088664	0.553424	0.579973	0.998968
YHL030W	686.286	0.223289	0.211978	1.05336	0.292177	NA
YGL077C	4385.5	0.0828966	0.161448	0.513457	0.607632	0.998968
YPL204W	2890.52	-0.096572	0.0911856	-1.05907	0.289568	0.998968
YPL251W	1.41868	0.335638	1.30366	0.257458	0.796825	NA
YIL009C-A	293.603	-0.302105	0.127802	-2.36385	0.0180862	NA
YOR091W	1300.35	-0.125633	0.234992	-0.534629	0.592907	0.998968
YGR026W	1821.03	0.130003	0.187603	0.692971	0.488328	0.998968
YAL040C	1602.55	0.0364517	0.166003	0.219585	0.826195	0.998968
YDR288W	456.242	-0.0869447	0.105183	-0.826601	0.408463	NA
YGL208W	446.144	-0.169409	0.189252	-0.895153	0.370705	NA
YNL284C	1084.46	0.0432195	0.0790007	0.547078	0.584325	0.998968
YIL164C	281.5	-0.140334	0.162286	-0.864734	0.387185	NA
YOL143C	1807.18	-0.0672447	0.103203	-0.651577	0.514674	0.998968
YBR237W	817.823	0.0579917	0.0647698	0.895352	0.370599	NA
YBR197C	384.248	-0.0961345	0.143075	-0.671916	0.501637	NA
YHR147C	747.982	0.0836142	0.132463	0.631227	0.527892	NA
YJL093C	1138.05	-0.065939	0.116721	-0.564928	0.572123	0.998968
YPL126W	2684.48	0.0904595	0.312378	0.289583	0.772135	0.998968
YMR317W	18.1662	0.0873794	0.37729	0.231597	0.816851	NA
YOR251C	1101.95	-0.0784221	0.140744	-0.557196	0.577393	0.998968
YPR181C	5134.03	-0.0470918	0.0782724	-0.60164	0.547413	0.998968
YCL008C	558.635	-0.0942028	0.108243	-0.870291	0.384141	NA
YOR107W	1063.77	-0.223482	0.280401	-0.797009	0.425446	0.998968
YML005W	345.737	0.0352175	0.156631	0.224844	0.822101	NA
YNL215W	850.602	-0.0871454	0.109413	-0.796485	0.42575	NA
YCR075W-A	159.092	-0.270114	0.211851	-1.27502	0.202302	NA
YDL059C	96.2109	0.0441064	0.167029	0.264064	0.79173	NA
YOR204W	3633.66	-0.0664942	0.24385	-0.272684	0.785096	0.998968
YEL012W	885.326	-0.116455	0.241305	-0.482606	0.629376	NA
YBL040C	1257.52	0.141242	0.179756	0.785742	0.432018	0.998968
YPR043W	8730.83	-0.151107	0.198555	-0.761035	0.446636	0.998968
YDR382W	11288.6	0.0117973	0.0936873	0.125922	0.899794	0.998968
YDR483W	4996.33	-0.00305461	0.111126	-0.0274877	0.978071	0.998968
YER061C	482.756	-0.229919	0.161234	-1.42599	0.15387	NA
YLR022C	444.427	-0.0590649	0.15296	-0.386145	0.699389	NA
YLR402W	57.3315	-0.207082	0.235838	-0.878068	0.379907	NA
YLR073C	200.329	-0.1241	0.624206	-0.198813	0.842409	NA
YER183C	395.419	-0.155845	0.126498	-1.23199	0.217951	NA
YHR090C	424.667	0.0366719	0.0941893	0.389343	0.697023	NA
YOL021C	2243.75	-0.0224622	0.173914	-0.129157	0.897233	0.998968
YHR030C	1711.89	-0.137858	0.152404	-0.904557	0.3657	0.998968
YBR295W	489.584	0.0772018	0.136022	0.567569	0.570328	NA
YKL018W	390.87	-0.120901	0.101937	-1.18603	0.235611	NA
YIL011W	100.704	-0.108413	0.197135	-0.549946	0.582357	NA
YEL034W	8775.35	-0.0856504	0.17817	-0.480723	0.630713	0.998968
YHL015W	13568.8	-0.0753132	0.142278	-0.529338	0.596571	0.998968
YNR050C	1549.28	0.00836174	0.0948775	0.088132	0.929772	0.998968
YDR134C	3780.4	0.0322296	0.174226	0.184987	0.853239	0.998968
YKL208W	272.693	-0.103018	0.162662	-0.633329	0.526519	NA
YGR004W	321.229	-0.0479873	0.186261	-0.257635	0.796688	NA
YML110C	1902.37	0.00524603	0.115912	0.0452586	0.963901	0.998968
YGL048C	3363.99	-0.0976243	0.123147	-0.792747	0.427926	0.998968
YGL243W	415.891	0.0403434	0.125732	0.320869	0.74831	NA
YKL106W	510.573	-0.181339	0.178667	-1.01495	0.310129	NA
tN(GUU)N1	9.94905	-0.323585	0.487044	-0.664385	0.506444	NA
YPR029C	1704.08	0.0739672	0.165723	0.446329	0.655359	0.998968
YJL034W	16496.3	-0.125468	0.13638	-0.919985	0.357581	0.998968
YFL048C	1522.46	-0.0479449	0.076949	-0.623074	0.533236	0.998968
YLR117C	873.878	0.220786	0.113005	1.95377	0.0507287	NA
YOR176W	1890.37	-0.144225	0.169662	-0.850075	0.395283	0.998968
YOR109W	1364.41	0.0150344	0.100066	0.150245	0.880572	0.998968
YBL089W	407.414	-0.0550084	0.087204	-0.630802	0.52817	NA
YDL084W	7511.2	0.11893	0.1019	1.16713	0.243158	0.998968
YGL116W	718.941	0.0667743	0.166138	0.401919	0.687743	NA
YNR034W-A	657.355	-0.371538	0.798842	-0.465095	0.641863	NA
YCR024C	316.802	0.102404	0.138787	0.737852	0.460605	NA
YIL102C-A	159.678	-0.073375	0.185894	-0.394714	0.693054	NA
YMR102C	908.359	0.139023	0.171577	0.810266	0.417787	NA
YCR071C	513.208	-0.0211398	0.135074	-0.156505	0.875635	NA
YDR175C	843.972	-0.0234469	0.121593	-0.19283	0.847092	NA
YOR189W	390.768	-0.154688	0.128581	-1.20305	0.228959	NA
YOR154W	605.573	0.0637304	0.231217	0.27563	0.782832	NA
YPR121W	505.388	-0.0838226	0.0854274	-0.981214	0.326487	NA
YBR070C	437.668	-0.145273	0.116624	-1.24566	0.212889	NA
YLL017W	4.36917	-0.935158	0.704861	-1.32673	0.184599	NA
YDR351W	863.273	0.187353	0.153574	1.21995	0.222483	NA
YNL315C	1222.21	0.115881	0.0992681	1.16735	0.243068	0.998968
YPR174C	387.094	0.048456	0.113493	0.42695	0.669416	NA
YJR045C	16649	0.229766	0.0971717	2.36454	0.0180526	0.423193
YMR008C	3345	0.056621	0.142908	0.396205	0.691954	0.998968
YDR349C	1809.49	-0.011697	0.0772771	-0.151365	0.879688	0.998968
YDL171C	4504.83	0.0404352	0.155584	0.259893	0.794947	0.998968
YKL062W	1407.55	0.0130284	0.214131	0.060843	0.951484	0.998968
YJR010W	425.218	-0.265587	0.0966227	-2.7487	0.00598323	NA
YJL218W	35.9869	-0.248547	0.27535	-0.90266	0.366706	NA
YIL126W	2159.31	0.172711	0.107854	1.60134	0.109302	0.998968
YDR093W	1535.56	0.0388232	0.136768	0.283861	0.776517	0.998968
YMR282C	722.972	0.00372583	0.106623	0.0349438	0.972125	NA
YIL109C	4289.47	-0.0401613	0.0688328	-0.583461	0.559583	0.998968
YFL022C	4759.58	-0.0650317	0.149124	-0.436091	0.662771	0.998968
YPL109C	446.186	-0.0804957	0.167136	-0.481618	0.630077	NA
YJL156C	820.34	0.159218	0.102974	1.54619	0.12206	NA
YNL071W	5173.86	-0.154333	0.125626	-1.22851	0.219254	0.998968
YMR088C	1312.63	-0.00229573	0.101992	-0.0225089	0.982042	0.998968
YGR211W	2660.24	0.306265	0.227517	1.34612	0.178264	0.998968
YKL139W	492.866	0.154455	0.213624	0.723022	0.469666	NA
YJL069C	819.367	0.0962986	0.466238	0.206544	0.836366	NA
YDR323C	210.714	-0.00903662	0.143365	-0.0630323	0.949741	NA
YDR344C	16.3022	0.196722	0.411617	0.477925	0.632704	NA
YJL016W	598.417	0.00176667	0.168863	0.0104622	0.991653	NA
YDR444W	810.889	0.104784	0.127688	0.820624	0.41186	NA
YPL189W	48.5309	0.176792	0.26355	0.670808	0.502343	NA
YLR285W	842.868	0.10324	0.108349	0.952841	0.340671	NA
YLR267W	73.9246	0.188083	0.301115	0.624621	0.53222	NA
YDL219W	366.636	0.280331	0.201173	1.39348	0.163474	NA
YNL017C	2.89698	-0.4517	0.921002	-0.490444	0.62382	NA
YCR024C-A	1424.29	0.237728	0.307575	0.772912	0.439574	0.998968
YCR024C-B	2840.73	0.387983	0.627125	0.61867	0.536134	0.998968
YKR024C	774.318	0.127338	0.492509	0.25855	0.795982	NA
YBR156C	460.891	-0.0248897	0.117429	-0.211956	0.832141	NA
YOR076C	442.834	0.152301	0.220522	0.690639	0.489792	NA
YEL059C-A	162.705	-0.301805	0.175852	-1.71625	0.0861172	NA
YDR405W	976.342	0.0361445	0.138401	0.261157	0.793972	NA
YOL091W	80.1502	0.554228	0.329609	1.68147	0.0926716	NA
YCL031C	1166.48	0.0400652	0.202891	0.197471	0.843459	0.998968
YIL027C	482.886	0.288049	0.201021	1.43293	0.151878	NA
YLR459W	741.355	0.141505	0.247879	0.570864	0.568092	NA
YNL243W	2895.25	-0.0602146	0.12139	-0.496043	0.619864	0.998968
YNR026C	795.413	-0.0804352	0.0890969	-0.902784	0.366641	NA
YHL044W	66.9578	-0.146237	0.3431	-0.426222	0.669946	NA
YPR204W	5700.67	-0.0515328	0.0796732	-0.646802	0.51776	0.998968
YNL297C	1086.69	0.254705	0.291126	0.874895	0.381631	0.998968
YBR170C	761.534	0.0241923	0.116151	0.208284	0.835007	NA
YGR149W	637.916	0.234264	0.252228	0.92878	0.353003	NA
YDR458C	1130.21	0.137639	0.138578	0.993225	0.3206	0.998968
YKL193C	839.009	-0.0490885	0.16243	-0.302213	0.76249	NA
YPR099C	13.905	-0.446075	0.389296	-1.14585	0.251858	NA
YLR310C	2512.69	0.239511	0.194591	1.23085	0.21838	0.998968
YNR008W	687.794	0.0461155	0.10025	0.460006	0.645512	NA
YJR150C	2.04892	0.234348	1.42955	0.163932	0.869785	NA
YBR301W	7.40752	0.392393	0.645633	0.607765	0.543343	NA
YLR003C	757.44	0.171724	0.302486	0.56771	0.570232	NA
YER113C	949.079	0.0726321	0.148103	0.490416	0.62384	NA
YHR122W	527.768	-0.0160898	0.173872	-0.0925381	0.926271	NA
YHL017W	717.514	0.0536869	0.114134	0.470386	0.63808	NA
YJR010C-A	320.046	-0.0864391	0.125353	-0.689568	0.490466	NA
YIL085C	1281.39	0.00558434	0.0700503	0.0797191	0.936461	0.998968
YMR190C	618.321	0.0908831	0.122408	0.74246	0.457809	NA
YLR325C	6689.86	-0.0621393	0.173078	-0.359026	0.719576	0.998968
YOR272W	1661.29	0.00161409	0.259667	0.006216	0.99504	0.998968
YOR058C	552.813	0.195504	0.122164	1.60034	0.109524	NA
YAL064W-B	23.3166	-0.285089	0.33451	-0.852259	0.394071	NA
YDR413C	6.87845	-1.32763	0.617079	-2.15147	0.0314388	NA
YBR203W	622.623	0.165518	0.210937	0.784676	0.432643	NA
YAR029W	18.8506	0.00632778	0.35824	0.0176635	0.985907	NA
YNL238W	1781.77	0.00255534	0.111059	0.0230088	0.981643	0.998968
YJL198W	1893.08	-0.0802336	0.246954	-0.324892	0.745262	0.998968
YOL135C	250.921	-0.146133	0.147833	-0.988503	0.322907	NA
YOR323C	2804.24	-0.128265	0.0927161	-1.38342	0.166537	0.998968
YLL041C	3572.01	-0.586576	0.152806	-3.8387	0.000123686	0.0122018
YKR074W	965.564	0.115564	0.163157	0.708302	0.478758	NA
YMR274C	271.8	0.0231798	0.106917	0.216802	0.828363	NA
YER026C	5607.16	0.132257	0.0673107	1.96487	0.0494288	0.883794
YMR201C	401.01	-0.116856	0.0967276	-1.20809	0.227013	NA
YLR069C	1882.91	0.107669	0.0942327	1.14258	0.253212	0.998968
YML042W	224.994	-0.251054	0.183961	-1.36471	0.172343	NA
YMR050C	539.297	0.263379	0.553915	0.475486	0.63444	NA
YDR069C	644.425	0.0317566	0.189498	0.167583	0.866912	NA
YOR298W	47.9051	-0.230453	0.319653	-0.720949	0.470941	NA
YEL066W	447.016	0.00172982	0.139047	0.0124405	0.990074	NA
YPR035W	19740.7	0.125641	0.1326	0.947521	0.343374	0.998968
YDR014W	236.983	0.192923	0.316986	0.608618	0.542777	NA
YDR227W	907.911	0.198901	0.212344	0.936695	0.348915	NA
YPR060C	571.42	-0.082808	0.172	-0.481443	0.630202	NA
YMR037C	1523.6	0.0606531	0.117139	0.517788	0.604606	0.998968
YCR038C	252.151	-0.111003	0.147538	-0.752365	0.451831	NA
YNL257C	1177.07	0.157348	0.150795	1.04346	0.296736	0.998968
YCR072C	731.709	0.0906089	0.568914	0.159267	0.873459	NA
YBR093C	354.841	0.0470875	0.204703	0.230028	0.81807	NA
YNL092W	117.104	-0.171702	0.291202	-0.589632	0.555437	NA
YGR045C	17.054	-0.0919073	0.357257	-0.257259	0.796979	NA
YAL037C-B	14.8411	-0.729388	0.600055	-1.21554	0.224162	NA
YLR134W	506.078	-0.0411561	0.0798932	-0.515139	0.606456	NA
YMR203W	3527.12	-0.00819125	0.0865436	-0.0946488	0.924594	0.998968
YPL225W	1837.79	0.112671	0.169111	0.666256	0.505248	0.998968
YPL270W	1431.93	0.00946272	0.0791791	0.11951	0.904871	0.998968
YDL012C	546.312	-0.150865	0.12369	-1.2197	0.222577	NA
YDR218C	12.5419	-0.141091	0.498478	-0.283044	0.777143	NA
YLR299W	1315.29	-0.0120944	0.187695	-0.0644365	0.948623	0.998968
YFL003C	47.1898	-0.401285	0.268072	-1.49693	0.134411	NA
YPL051W	286.025	-0.0486675	0.116226	-0.41873	0.675414	NA
YNL054W	934.964	0.0385355	0.0904804	0.425899	0.670181	NA
YDR156W	539.701	-0.0445643	0.204825	-0.217572	0.827762	NA
YPL062W	2.70453	0.741412	0.947097	0.782825	0.43373	NA
YPR155C	886.251	-0.0194337	0.138858	-0.139954	0.888697	NA
YOR137C	582.547	0.158901	0.189155	0.840061	0.400874	NA
YKL123W	117.596	-0.0931015	0.27003	-0.344782	0.730258	NA
YKL172W	2392.41	0.134868	0.251397	0.536475	0.591631	0.998968
YNL336W	856.154	-0.0741849	0.144583	-0.513094	0.607885	NA
YDR305C	357.901	-0.0246518	0.139472	-0.176751	0.859704	NA
YJL057C	650.099	-0.142614	0.260822	-0.546787	0.584525	NA
YPR100W	1028.7	0.100754	0.121792	0.827263	0.408088	0.998968
YDR358W	771.104	-0.112497	0.312948	-0.359476	0.719239	NA
YJL152W	6.72736	-0.0040636	0.570404	-0.00712407	0.994316	NA
YLR096W	1363.4	0.150246	0.155291	0.96751	0.333289	0.998968
YKR052C	369.466	-0.00328077	0.100176	-0.0327499	0.973874	NA
YLR427W	1117.71	-0.0984032	0.0794224	-1.23899	0.215351	0.998968
YDL152W	1.14127	-0.291142	1.71838	-0.169428	0.86546	NA
YGL015C	6.05566	-0.823262	0.690408	-1.19243	0.233093	NA
YEL064C	388.961	0.0131929	0.140606	0.0938284	0.925245	NA
YMR127C	302.403	0.134595	0.210005	0.640911	0.52158	NA
YIL140W	2239.28	-0.144953	0.0910838	-1.59143	0.111514	0.998968
YOL163W	52.6328	-0.209903	0.26882	-0.780833	0.434901	NA
YLR197W	5894.04	0.204166	0.191135	1.06818	0.285439	0.998968
YBR213W	178.911	-0.018193	0.140568	-0.129425	0.897021	NA
YAL064W	3.97108	-0.702595	0.863771	-0.813404	0.415986	NA
YJL204C	443.216	0.215197	0.292279	0.736272	0.461565	NA
YLR244C	3163.93	-0.0135684	0.135652	-0.100023	0.920326	0.998968
YJR084W	525.835	-0.0261815	0.0890808	-0.293908	0.768828	NA
YLR233C	437.84	0.0620251	0.186857	0.331939	0.739935	NA
YDL238C	204.488	-0.0711698	0.256026	-0.277979	0.781028	NA
YGL084C	1049.72	0.0803637	0.163873	0.490404	0.623848	0.998968
YLR382C	1137.85	0.0741571	0.0780301	0.950365	0.341927	0.998968
YLR154C-H	6.81542	-0.911935	1.04029	-0.876614	0.380696	NA
YLR154C-G	160.397	-0.560494	0.328373	-1.70688	0.0878439	NA
YGR238C	586.541	0.0292898	0.093536	0.31314	0.754175	NA
YDR363W	511.795	0.0153507	0.087229	0.175982	0.860308	NA
YNL114C	11.37	-0.0879747	0.476731	-0.184537	0.853592	NA
YNL163C	1461.32	0.135582	0.183882	0.737333	0.46092	0.998968
snR55	5.86086	0.707515	0.694092	1.01934	0.308042	NA
snR54	4.63733	-0.37821	1.24491	-0.303804	0.761277	NA
snR57	9.56084	0.704908	0.752618	0.936607	0.348961	NA
YHR009C	1356.17	-0.0700787	0.101588	-0.68983	0.490301	0.998968
snR50	9.10278	1.21304	0.519144	2.33661	0.0194595	NA
YFR050C	2283.37	-0.0536012	0.117489	-0.456223	0.64823	0.998968
YLR331C	1.83744	0.432671	1.08613	0.398359	0.690366	NA
YNR069C	201.497	-0.0197069	0.128654	-0.153178	0.878258	NA
YOL058W	1536.59	-0.517047	0.223913	-2.30914	0.0209359	0.4612
YAR019C	414.199	-0.0558908	0.149214	-0.374568	0.707982	NA
YML129C	555.422	0.00486816	0.18651	0.0261014	0.979176	NA
YGL257C	1313.51	0.126345	0.168139	0.751432	0.452392	0.998968
YGR020C	2501.64	0.00326419	0.123371	0.0264582	0.978892	0.998968
YOR093C	854.696	0.198986	0.211528	0.940709	0.346854	NA
YAL046C	323.309	-0.336269	0.167273	-2.0103	0.0443992	NA
YOR392W	3.42197	0.777697	0.822864	0.94511	0.344603	NA
YAL039C	912.053	-0.0408827	0.168957	-0.241971	0.808802	NA
YGR100W	1029.24	0.00229089	0.125346	0.0182765	0.985418	0.998968
YLR403W	1255.17	0.100494	0.12141	0.827724	0.407827	0.998968
YOL118C	9.97018	0.155606	0.458328	0.339509	0.734227	NA
YDR286C	160.817	-0.0676168	0.128749	-0.525184	0.599455	NA
YHR141C	8577.06	-0.0723301	0.21528	-0.335982	0.736884	0.998968
YPL128C	667.327	0.0897296	0.120027	0.747581	0.454713	NA
YJL091C	765.863	-0.0367047	0.216859	-0.169256	0.865595	NA
YBR191W	10769.6	-0.106532	0.152784	-0.697268	0.485635	0.998968
YDR380W	1869.08	-0.222192	0.192815	-1.15235	0.249176	0.998968
YGR191W	2245.44	-0.0485046	0.174348	-0.278205	0.780855	0.998968
YGR047C	762.406	0.20756	0.137452	1.51005	0.131031	NA
YDR485C	896.182	-0.0169137	0.0848046	-0.199443	0.841916	NA
YPL239W	978.591	0.134599	0.160125	0.840582	0.400582	NA
YPR183W	2671.99	-0.162019	0.134501	-1.2046	0.228359	0.998968
YOR206W	2910.54	0.160177	0.312432	0.51268	0.608175	0.998968
YEL049W	7.78691	-0.296823	0.9002	-0.32973	0.741604	NA
YOR391C	13.6437	-0.874718	0.519178	-1.68481	0.0920244	NA
YDR525W-A	199.972	0.0867878	0.177335	0.489401	0.624558	NA
YBR089W	4.71883	-0.488876	0.704528	-0.693906	0.487741	NA
YLR075W	28385	-0.124819	0.164527	-0.758652	0.448061	0.998968
YBR054W	142.445	-0.0255793	0.316562	-0.0808034	0.935598	NA
YLR020C	818.998	0.0584347	0.124923	0.467764	0.639953	NA
YNL217W	962.993	-0.147758	0.142881	-1.03413	0.301076	NA
YLR404W	249.423	0.179739	0.169524	1.06026	0.289026	NA
YLR154W-A	1.255	-0.0676243	1.42897	-0.0473238	0.962255	NA
YIL013C	207.597	-0.0432449	0.151219	-0.285975	0.774898	NA
YPL206C	996.328	0.0262979	0.112873	0.232986	0.815772	0.998968
YDL060W	1984.64	0.0333596	0.282396	0.118131	0.905964	0.998968
YBR293W	709.97	0.130537	0.118526	1.10133	0.270751	NA
YNR052C	1151.85	-0.0998195	0.111989	-0.891329	0.372753	0.998968
YHR032W	1275.96	-0.0773215	0.192476	-0.401721	0.68789	0.998968
YEL032W	1361.36	0.0919226	0.124743	0.736895	0.461186	0.998968
YOL076W	624.978	0.145459	0.307945	0.472355	0.636673	NA
YDR136C	2.65907	-2.07039	1.04579	-1.97974	0.0477331	NA
YHR203C	13070	-0.0944864	0.175116	-0.539565	0.589497	0.998968
YML112W	395.025	-0.116878	0.129835	-0.900204	0.368012	NA
YLR154W-C	7.96808	0.146797	0.512322	0.286532	0.77447	NA
YGL241W	636.832	0.126297	0.196791	0.641782	0.521015	NA
YDL071C	6.82715	-0.125342	0.536839	-0.233482	0.815387	NA
YPR176C	621.697	-0.0102398	0.095909	-0.106766	0.914974	NA
YDR057W	636.705	0.0860611	0.111521	0.771707	0.440288	NA
YJL036W	853.279	0.00103304	0.179117	0.00576738	0.995398	NA
YER009W	3434.98	0.0757238	0.102539	0.738489	0.460217	0.998968
YLR115W	775.083	0.104466	0.152615	0.68451	0.493653	NA
YLR140W	1.88564	0.94744	1.13756	0.832867	0.404919	NA
YGL114W	1225.92	-0.054227	0.0946408	-0.572977	0.56666	0.998968
YER167W	904.232	0.0616789	0.0723293	0.852752	0.393797	NA
YMR104C	1292.43	-0.0178265	0.255064	-0.0698902	0.944281	0.998968
YER185W	86.251	0.267652	0.273512	0.978574	0.32779	NA
YDL195W	4827.69	-0.0078949	0.0746941	-0.105696	0.915823	0.998968
YNL199C	1040.11	-0.128514	0.110677	-1.16116	0.245578	0.998968
YCR026C	1302.91	0.030623	0.0751859	0.407297	0.68379	0.998968
YBL052C	835.749	0.246003	0.179899	1.36745	0.171484	NA
YBR076W	8.3058	-1.21669	0.53757	-2.26331	0.0236167	NA
YNL317W	460.205	-0.17172	0.118382	-1.45056	0.146903	NA
YLL019C	1785.39	-0.0678234	0.07519	-0.902027	0.367043	0.998968
YOR156C	357.838	0.0125949	0.0997601	0.126252	0.899532	NA
YHR052W	1706.01	0.166679	0.296769	0.561646	0.574357	0.998968
YKR026C	841.002	0.0208771	0.150725	0.138511	0.889837	NA
YJR043C	492.417	-0.0119379	0.1182	-0.100998	0.919552	NA
YJR012C	237.955	-0.0582047	0.138813	-0.419304	0.674994	NA
YKL060C	65902.4	-0.0833716	0.16268	-0.512489	0.608309	0.998968
YCR044C	759.382	0.00305044	0.0948271	0.0321685	0.974338	NA
YKL035W	6420.61	-0.290976	0.275348	-1.05676	0.290623	0.998968
YLR264C-A	2.81664	0.043406	0.879821	0.0493351	0.960652	NA
YNL073W	2566.18	0.0601673	0.114099	0.527327	0.597967	0.998968
YMR280C	704.462	-0.0243711	0.231428	-0.105307	0.916132	NA
YFL020C	26.2316	0.168393	0.338874	0.49692	0.619245	NA
YNL328C	48.9102	-0.27352	0.245937	-1.11215	0.266073	NA
YJL014W	3495.19	0.0366605	0.0922749	0.397296	0.691149	0.998968
YMR031C	3622.03	0.0490725	0.241038	0.203588	0.838675	0.998968
YOR174W	687.857	-0.162128	0.10237	-1.58374	0.113253	NA
YPR149W	2866.47	-0.117318	0.201965	-0.580884	0.561319	0.998968
YNL015W	2012.59	-0.440006	0.204284	-2.15389	0.0312487	0.611235
YCR084C	3795.13	0.0446655	0.114422	0.390357	0.696273	0.998968
YHR178W	387.603	-0.0522217	0.0934459	-0.558844	0.576268	NA
YDR260C	379.236	-0.122149	0.135812	-0.899401	0.368439	NA
YLR283W	344.994	0.0191435	0.153145	0.125002	0.900522	NA
YPL170W	411.306	-0.0515438	0.16936	-0.304345	0.760865	NA
YPR001W	97.8699	0.0216334	0.167352	0.129269	0.897145	NA
YDR204W	513.39	-0.206985	0.203522	-1.01702	0.309145	NA
YBR085C-A	1410.38	-0.155869	0.472038	-0.330204	0.741246	0.998968
YDR251W	2445.73	0.00908642	0.19706	0.04611	0.963223	0.998968
YNL048W	1048.16	0.121715	0.129512	0.939795	0.347323	0.998968
YML057C-A	1.59621	-1.22709	1.13438	-1.08173	0.279374	NA
YOR074C	716.299	0.0471997	0.097715	0.483035	0.629071	NA
YPL028W	4280.46	-0.209924	0.132233	-1.58753	0.112392	0.998968
YJR152W	443.083	0.0128611	0.158605	0.0810888	0.935371	NA
YKL025C	1043.65	0.14069	0.120847	1.1642	0.244343	0.998968
YAR008W	343.015	0.138571	0.12852	1.07821	0.280942	NA
YOR003W	220.043	-0.0954479	0.195821	-0.487424	0.625958	NA
YOL097C	2928.67	-0.0641096	0.131911	-0.486007	0.626962	0.998968
YOR110W	656.678	-0.139084	0.125289	-1.1101	0.266954	NA
YDR407C	1167.5	0.10997	0.196586	0.559397	0.575891	0.998968
YNR020C	421.012	0.129604	0.129544	1.00046	0.317088	NA
YBR258C	127.538	0.131463	0.157526	0.834546	0.403973	NA
YNL146W	22.6216	0.709632	0.508082	1.39669	0.162507	NA
YFR019W	930.011	0.080729	0.179484	0.449784	0.652866	NA
YLR262C-A	1711.56	0.0307655	0.21483	0.143209	0.886125	0.998968
YBR223C	324.035	-0.194826	0.154088	-1.26438	0.206092	NA
YNL241C	3418.95	-0.138457	0.22074	-0.627243	0.5305	0.998968
YJL154C	1530.59	0.0508005	0.138175	0.367654	0.713131	0.998968
YDR091C	2814.48	0.0975113	0.233788	0.417094	0.67661	0.998968
YJL123C	2128.3	-0.0942722	0.0887408	-1.06233	0.288085	0.998968
YHR066W	932.735	0.0782083	0.518733	0.150768	0.880159	NA
YPL047W	276.771	-0.0785653	0.134471	-0.584255	0.559049	NA
YER086W	4111.03	-0.107406	0.154149	-0.696772	0.485945	0.998968
YLR287C-A	7563.94	0.0326932	0.118017	0.27702	0.781765	0.998968
RPR1	36.9236	-0.0615738	0.404778	-0.152117	0.879094	NA
YBR176W	328.744	-0.179268	0.0944952	-1.89711	0.0578132	NA
YDR207C	804.233	0.0579513	0.104529	0.554404	0.579302	NA
YKL125W	597.826	0.0821195	0.155297	0.52879	0.596951	NA
YDR373W	693.511	-0.00151356	0.0949565	-0.0159395	0.987283	NA
YGL238W	1789.9	0.260216	0.291919	0.891397	0.372716	0.998968
YLR190W	1708.82	-0.0288887	0.141579	-0.204047	0.838316	0.998968
YNL128W	65.9137	0.0188503	0.217758	0.0865651	0.931017	NA
YLR312C	422.514	0.00573712	0.261599	0.021931	0.982503	NA
YKL191W	1432.65	-0.0867934	0.24434	-0.355215	0.722429	0.998968
YNR006W	1260.56	-0.0163287	0.118759	-0.137495	0.89064	0.998968
YHR120W	578.433	0.136192	0.194892	0.698809	0.484672	NA
YAR050W	142.864	-0.299695	0.23005	-1.30274	0.192663	NA
YOL137W	541.104	0.274454	0.152004	1.80556	0.0709866	NA
YDR530C	803.535	-0.327745	0.14323	-2.28823	0.0221239	NA
YER111C	436.372	0.303564	0.285875	1.06188	0.288292	NA
YER144C	1189.52	-0.187014	0.103903	-1.79989	0.0718784	0.998968
YOL039W	6544.72	-0.0600731	0.186134	-0.322741	0.746892	0.998968
YIL083C	852.088	-0.00227691	0.110613	-0.0205845	0.983577	NA
YHL011C	2662.7	-0.0247354	0.152879	-0.161798	0.871465	0.998968
YGR184C	1527.51	0.172482	0.19065	0.904707	0.36562	0.998968
YMR303C	375.813	-0.123899	0.200075	-0.619263	0.535743	NA
YDR307W	682.824	0.232257	0.217918	1.0658	0.286514	NA
YDR411C	1350.04	-0.217307	0.164818	-1.31846	0.18735	0.998968
YBR205W	1556.5	0.0377097	0.0675295	0.558418	0.576559	0.998968
YOR321W	925.29	-0.193707	0.136739	-1.41662	0.156594	NA
YMR186W	23762.3	0.494495	0.121077	4.08413	4.42422e-05	0.00528345
YMR278W	679.164	-0.146221	0.105824	-1.38173	0.167055	NA
YLR136C	566.207	0.270678	0.266961	1.01392	0.310619	NA
YMR207C	711.617	0.120138	0.142581	0.842598	0.399453	NA
YML015C	677.084	0.0441641	0.134342	0.328744	0.742349	NA
YOR197W	2659.5	-0.0948487	0.0796358	-1.19103	0.233641	0.998968
YKR089C	2087.94	-0.0124925	0.193299	-0.064628	0.94847	0.998968
YDL041W	1.7467	0.0240091	1.29053	0.0186041	0.985157	NA
YKR072C	1234.14	-0.000352382	0.19103	-0.00184464	0.998528	0.998968
YDL014W	7897.78	0.0503058	0.186667	0.269495	0.787549	0.998968
YER079W	529.385	-0.250939	0.316883	-0.791899	0.42842	NA
YER024W	606.707	-0.0917604	0.0936905	-0.979399	0.327383	NA
YOR230W	4579.57	-0.0728726	0.135749	-0.53682	0.591392	0.998968
YGR234W	7364.43	-0.0695823	0.165825	-0.419612	0.674769	0.998968
YMR178W	833.351	0.0099168	0.132443	0.0748762	0.940313	NA
YPR037C	852.814	-0.0769675	0.157058	-0.490059	0.624092	NA
YEL068C	205.574	-0.0430307	0.154716	-0.278127	0.780915	NA
YNL090W	605.426	-0.173913	0.134205	-1.29587	0.195019	NA
YOR307C	712.446	0.101764	0.146876	0.69286	0.488397	NA
YMR225C	616.643	0.0184571	0.13949	0.132318	0.894733	NA
YBR095C	675.121	-0.00342511	0.0900325	-0.0380431	0.969653	NA
YDR036C	1085.65	-0.0115202	0.0777214	-0.148225	0.882165	0.998968
YGR043C	324.941	-0.418187	0.24067	-1.73759	0.0822826	NA
YPL223C	55.9767	-0.0117822	0.307373	-0.038332	0.969423	NA
YPL272C	270.769	-0.153857	0.202362	-0.760305	0.447072	NA
YPR002C-A	65.8733	0.483114	0.456241	1.0589	0.289645	NA
YOL002C	1209.24	0.0475439	0.199594	0.238203	0.811724	0.998968
YFL005W	1755.65	0.0311521	0.09773	0.318757	0.749911	0.998968
YCR010C	22.2644	-0.0661849	0.43986	-0.150468	0.880395	NA
YMR152W	1101.89	0.0685467	0.132543	0.517167	0.60504	0.998968
YDR154C	5309.22	-0.0889844	0.172545	-0.515717	0.606052	0.998968
YMR125W	2214.92	0.269187	0.266491	1.01011	0.31244	0.998968
YJR031C	767.373	0.158958	0.251862	0.631132	0.527954	NA
YCL026C-A	21.3234	-0.629591	0.356733	-1.76488	0.077584	NA
YCL026C-B	386.376	-0.131581	0.126317	-1.04167	0.297565	NA
YGR118W	7438.03	-0.101273	0.203771	-0.496992	0.619194	0.998968
YJL055W	1963.02	-0.0415646	0.14212	-0.292461	0.769934	0.998968
YPR102C	9239.43	-0.105909	0.172571	-0.613714	0.539404	0.998968
YNL334C	199.947	-0.614373	0.122417	-5.01868	5.20264e-07	NA
YGL123W	28443	-0.0788197	0.144799	-0.544337	0.58621	0.998968
YPL064C	553.268	-0.136208	0.119839	-1.13659	0.25571	NA
YPL086C	1468.97	0.000375896	0.198192	0.00189663	0.998487	0.998968
YPR153W	113.27	0.135105	0.158336	0.853282	0.393503	NA
YMR042W	220.183	-0.168548	0.215021	-0.78387	0.433117	NA
YLL003W	734.565	0.0938932	0.186899	0.502375	0.615404	NA
YER042W	380.53	0.126063	0.151658	0.831232	0.405843	NA
YDR109C	572.567	0.0238966	0.0910154	0.262556	0.792893	NA
YDR221W	865.143	0.140481	0.0999961	1.40487	0.160061	NA
YLR109W	5134.14	0.0776778	0.228434	0.340046	0.733822	0.998968
YKR009C	330.488	-0.305928	0.140128	-2.1832	0.029021	NA
YMR078C	740.205	0.0406527	0.154122	0.263769	0.791958	NA
YLR094C	928.12	-0.158074	0.173074	-0.91333	0.361069	NA
YBR037C	517.908	-0.0298137	0.164868	-0.180834	0.856498	NA
YLR041W	18.9034	-0.103055	0.338535	-0.304415	0.760811	NA
YJR060W	773.861	0.0378369	0.11629	0.325366	0.744904	NA
YNL161W	1279.19	-0.0478034	0.092782	-0.515223	0.606397	0.998968
YIL146C	400.207	0.0339745	0.0903578	0.375999	0.706917	NA
YLR195C	1234.35	0.0684837	0.0896215	0.764144	0.444782	0.998968
YLR231C	809.951	-0.282028	0.135203	-2.08596	0.0369821	NA
YKL016C	4899.99	-0.453265	0.132189	-3.42893	0.000605973	0.0429673
YPL111W	5656.4	0.0102992	0.154255	0.0667673	0.946767	0.998968
YKL174C	1108.52	0.0724148	0.116538	0.621385	0.534346	0.998968
YKL121W	561.904	-0.0448098	0.198871	-0.225321	0.821729	NA
YLR380W	1489.06	-0.0825116	0.132671	-0.621929	0.533989	0.998968
YOR142W-B	3462.32	0.193823	0.231649	0.83671	0.402756	0.998968
YMR012W	4859.92	0.0815569	0.180267	0.452423	0.650964	0.998968
YER093C	674.487	0.21857	0.189713	1.15211	0.249276	NA
YOR032W-A	6.64314	-0.203323	0.541	-0.375828	0.707044	NA
YDL201W	970.562	0.0533267	0.17785	0.299842	0.764298	NA
YDR468C	647.421	0.0331778	0.106686	0.310985	0.755812	NA
snR73	2.42352	1.97783	1.20427	1.64234	0.100519	NA
snR72	3.0321	-0.508528	0.860226	-0.591156	0.554416	NA
snR71	1.53582	1.07895	1.29694	0.831922	0.405453	NA
snR70	23.0245	0.368714	0.319153	1.15529	0.247972	NA
snR77	5.22877	-0.0314251	0.966535	-0.0325132	0.974063	NA
snR76	31.0255	0.298143	0.255132	1.16859	0.24257	NA
snR75	3.14213	-0.0640876	0.875119	-0.0732331	0.941621	NA
snR74	1.59692	-0.676722	1.27772	-0.529631	0.596368	NA
YFR003C	501.498	-0.0631185	0.287643	-0.219434	0.826312	NA
snR79	1.72314	1.88476	1.43269	1.31554	0.188329	NA
YIL033C	2642.61	-0.131746	0.21844	-0.603124	0.546426	0.998968
YOR368W	292.344	0.17324	0.167762	1.03265	0.301766	NA
YGR128C	1444.9	0.187378	0.435564	0.430196	0.667053	0.998968
YIL048W	1242.87	0.15987	0.184296	0.867459	0.385691	0.998968
YLR337C	1433.97	-0.0699158	0.110844	-0.630761	0.528197	0.998968
YOL056W	467.638	0.0822385	0.0820983	1.00171	0.316485	NA
YFR052W	1568.64	0.0754729	0.0983617	0.767299	0.442904	0.998968
YGR088W	649.09	-0.517145	0.778763	-0.66406	NA	NA
YGL073W	1212.98	0.04159	0.090962	0.457224	0.64751	0.998968
YGL259W	21.0135	-0.464549	0.403302	-1.15186	0.249377	NA
YGR106C	2848.59	0.177784	0.228863	0.776817	0.437267	0.998968
YIL168W	88.6607	0.0259159	0.177258	0.146205	0.88376	NA
YGL086W	855.608	0.19349	0.257598	0.75113	0.452574	NA
YAL044C	1173.88	-0.242724	0.195098	-1.24411	0.21346	0.998968
YPR081C	648.844	-0.0502275	0.131194	-0.38285	0.701831	NA
YDR284C	915.267	0.0884483	0.113574	0.778775	0.436112	NA
YJL097W	872.34	0.050139	0.137176	0.365508	0.714732	NA
YOR121C	18.8862	0.671357	0.698299	0.961417	0.336343	NA
YOR048C	2090.6	0.114564	0.178655	0.64126	0.521354	0.998968
YHR143W	5634.57	0.299157	0.153051	1.95463	0.0506268	0.890482
YMR315W-A	3.99259	0.421887	0.717315	0.588147	0.556433	NA
YLR157W-E	22.9575	0.000971777	0.357649	0.00271713	0.997832	NA
YLR157W-D	48.2761	-0.450673	0.295963	-1.52274	0.127824	NA
YCL004W	414.078	0.0787134	0.103139	0.763174	0.445359	NA
YPL042C	617.702	-0.106065	0.14343	-0.739488	0.45961	NA
YBL044W	4.60772	-1.65839	0.773606	-2.14371	0.0320563	NA
YDR430C	1020.89	0.217542	0.092293	2.35708	0.0184195	0.426467
YGL102C	10.7292	-0.44437	0.561853	-0.7909	0.429002	NA
YDR487C	1930.07	-0.049845	0.106113	-0.469734	0.638545	0.998968
YPR185W	817.676	-0.00529149	0.133469	-0.0396458	0.968376	NA
YER065C	962.464	-0.177734	0.130436	-1.36262	0.173003	NA
YLR077W	852.51	-0.0138503	0.133994	-0.103365	0.917673	NA
YBR056W	1720.47	-0.173887	0.255239	-0.681271	0.4957	0.998968
YLL020C	222.77	-0.185852	0.116799	-1.59121	0.111562	NA
YHR034C	342.595	-0.105246	0.150362	-0.699954	0.483956	NA
YBL019W	348.412	-0.198948	0.133297	-1.49251	0.135566	NA
YOL070C	921.589	-0.0588232	0.13107	-0.448792	0.653582	NA
YJL085W	485.219	0.0917725	0.154915	0.592407	0.553578	NA
YPL200W	6.52643	-0.468532	0.625601	-0.748931	0.453899	NA
YNR054C	615.875	-0.0121761	0.27143	-0.0448592	0.96422	NA
YDR130C	366.468	0.0535851	0.122416	0.437729	0.661583	NA
YIL015W	2447.6	-0.447264	0.251504	-1.77835	0.0753457	0.998968
YEL030W	184.119	-0.109288	0.182701	-0.598179	0.54972	NA
YBR291C	239.324	-0.0399968	0.170273	-0.234898	0.814288	NA
YML114C	793.592	-0.0949727	0.155553	-0.61055	0.541498	NA
YCR108C	1.6321	0.208136	1.13666	0.183111	0.854711	NA
YHR201C	1145.61	0.00321241	0.0832157	0.0386034	0.969207	0.998968
YNL299W	525.373	0.0586841	0.263423	0.222775	0.823711	NA
YGR008C	2164.59	-0.395826	0.638317	-0.620109	0.535186	0.998968
YNL311C	555.223	0.08297	0.173799	0.477391	0.633084	NA
YPR170C	2.29624	-0.420955	0.976131	-0.431249	0.666287	NA
YJL030W	307.484	-0.046686	0.135955	-0.343392	0.731304	NA
YGR248W	219.251	-0.579828	0.865603	-0.669854	NA	NA
YBR074W	1115.28	0.0392481	0.186893	0.210002	0.833666	0.998968
YOR150W	816.058	-0.00551879	0.110776	-0.0498196	0.960266	NA
YML036W	245.884	0.134896	0.157711	0.855337	0.392365	NA
YDL236W	1844.65	-0.0578817	0.0875105	-0.661426	0.508339	0.998968
YDL088C	1030.34	0.0770629	0.0804013	0.958479	0.337822	0.998968
YLR113W	3141.14	-0.0656071	0.111832	-0.586657	0.557434	0.998968
YLR142W	2871.38	0.183539	0.139133	1.31916	0.187116	0.998968
YLL058W	529.285	-0.121691	0.125997	-0.965826	0.334131	NA
YDL197C	800.298	-0.121398	0.133361	-0.910294	0.362667	NA
YER130C	847.993	-0.0310563	0.130456	-0.238059	0.811835	NA
YER165W	11488.4	0.081378	0.124009	0.656225	0.511679	0.998968
YMR106C	290.816	-0.0564528	0.0986621	-0.572183	0.567198	NA
YER187W	64.7272	0.0566681	0.239077	0.237028	0.812635	NA
YGL112C	1543.19	-0.0613455	0.0707022	-0.86766	0.385581	0.998968
YMR244W	13.6723	0.10471	0.521657	0.200725	0.840914	NA
YDL008W	326.741	-0.19124	0.148401	-1.28867	0.197513	NA
YBL050W	1621.51	-0.0660641	0.144151	-0.458299	0.646738	0.998968
YJR086W	357.163	-0.0927933	0.208073	-0.445964	0.655623	NA
YJR014W	1816.11	-0.0574137	0.0805719	-0.712577	0.476107	0.998968
YHR050W	1865.83	-0.080675	0.0719245	-1.12166	0.262006	0.998968
YPL018W	192.101	0.0221	0.123421	0.179062	0.857889	NA
YPL185W	12.1049	0.482202	0.480981	1.00254	0.316084	NA
YJR041C	1071.52	0.255899	0.495594	0.516348	0.605611	0.998968
YDL248W	422.164	0.129272	0.23077	0.560178	0.575358	NA
YKR028W	1867.45	0.113881	0.0742721	1.53329	0.125205	0.998968
YKL037W	3.93169	-0.321714	0.790817	-0.406812	0.684146	NA
YMR286W	477.47	-0.0434844	0.142601	-0.304937	0.760414	NA
YDL175C	387.825	-0.148426	0.105182	-1.41113	0.158205	NA
YKL168C	511.344	-0.0851561	0.145794	-0.584085	0.559163	NA
YFL026W	4773.62	-0.0855334	0.241665	-0.353934	0.723388	0.998968
YDL102W	773.054	0.146574	0.167918	0.872891	0.382723	NA
YGL029W	630.496	0.00838815	0.244336	0.0343304	0.972614	NA
YDL128W	2891.38	-0.0333831	0.110209	-0.302907	0.761961	0.998968
YPL098C	675.303	-0.0822863	0.156984	-0.524168	0.600161	NA
YMR033W	1373.73	0.163036	0.160585	1.01527	0.309979	0.998968
YPR003C	485.438	-0.0226144	0.112568	-0.200895	0.840781	NA
YGR262C	811.962	0.0227173	0.114761	0.197953	0.843082	NA
YDR202C	563.14	-0.0677426	0.149994	-0.451637	0.651531	NA
YGR215W	572.134	0.153442	0.116674	1.31513	0.188465	NA
YDR253C	46.7689	0.0412494	0.355971	0.115879	0.907749	NA
YCR082W	982.387	0.0694213	0.0823625	0.842875	0.399298	0.998968
YOR001W	2064.88	0.0773181	0.200737	0.385172	0.70011	0.998968
YKL088W	976.368	0.0914501	0.0777031	1.17692	0.239228	NA
YEL075W-A	19.811	0.00232355	0.609748	0.00381067	0.99696	NA
YLR276C	2258.42	0.125425	0.271074	0.462696	0.643583	0.998968
YDL222C	210.283	-0.150693	0.550086	-0.273944	0.784127	NA
YNL140C	114.9	-0.155444	0.179391	-0.866511	0.38621	NA
YOL095C	268.437	0.0689886	0.196755	0.350633	0.725864	NA
YNR022C	655.5	-0.047445	0.0941735	-0.503804	0.614399	NA
YDR409W	519.11	-0.0331287	0.124242	-0.266646	0.789742	NA
YBR221C	6449.24	-0.00817502	0.0875899	-0.093333	0.925639	0.998968
YEL018C-A	4.74064	0.0440241	0.70201	0.0627115	0.949996	NA
YAL005C	16733.2	1.21552	0.246113	4.93886	7.85799e-07	0.000193508
YPL158C	677.706	-0.0187646	0.238695	-0.0786134	0.93734	NA
tG(GCC)P2	11.9999	-0.144537	0.511169	-0.282759	0.777362	NA
YJL121C	1845.24	-0.161664	0.12096	-1.3365	0.181385	0.998968
YKL008C	886.496	0.370318	0.200307	1.84876	0.0644932	NA
YER158W-A	3.63288	0.400869	0.957987	0.418449	0.675619	NA
YBR103W	750.819	-0.0159968	0.0997742	-0.16033	0.872621	NA
YNR004W	67.7137	0.0135308	0.20955	0.0645706	0.948516	NA
YPL032C	1849.33	0.0775231	0.173061	0.447953	0.654187	0.998968
YHR064C	7385.48	0.026001	0.113291	0.229505	0.818476	0.998968
YKL197C	604.972	-0.0529316	0.0928737	-0.569931	0.568724	NA
YMR020W	566.274	-0.0803009	0.187464	-0.428353	0.668394	NA
YDR206W	1737.06	0.204819	0.185275	1.10548	0.26895	0.998968
YDR377W	2310.24	-0.333846	0.107138	-3.11605	0.00183294	0.0904116
YIR007W	342.672	-0.211485	0.194731	-1.08603	0.277464	NA
YPL045W	615.707	0.0161738	0.145532	0.111136	0.911509	NA
YLR314C	2736.22	0.165838	0.154507	1.07333	0.283122	0.998968
YFR020W	205.601	-0.148773	0.138459	-1.07449	0.282603	NA
YNL126W	456.86	0.394178	0.28121	1.40172	0.160998	NA
YOR327C	1123.89	-0.129899	0.121332	-1.07061	0.284345	0.998968
YOL139C	5519.48	0.063202	0.112218	0.563208	0.573293	0.998968
YBR207W	1537.05	0.0578682	0.078503	0.737147	0.461033	0.998968
YNL269W	3.61715	0.475008	0.764671	0.621193	0.534472	NA
YDR532C	386.545	0.202926	0.223623	0.907449	0.364169	NA
YKL210W	5814.67	0.0842262	0.0788719	1.06789	0.285572	0.998968
YER146W	594.06	0.0377698	0.137659	0.274372	0.783799	NA
YHR159W	295.259	-0.16174	0.200848	-0.805288	0.420653	NA
YPL132W	469.014	-0.0582179	0.105859	-0.549957	0.582349	NA
YIL114C	305.104	0.126101	0.112591	1.11999	0.262717	NA
YJL089W	21.6907	-0.270183	0.463215	-0.583278	0.559706	NA
YMR301C	1176.42	-0.0187313	0.135063	-0.138686	0.889699	0.998968
YJL217W	413.485	0.146714	0.151141	0.970712	0.331692	NA
YBL029W	82.6596	0.0160142	0.417586	0.0383495	0.969409	NA
YMR188C	789.462	0.201981	0.131149	1.54008	0.12354	NA
YGR154C	200.061	-0.148274	0.14546	-1.01935	0.308037	NA
snR191	8.92407	-0.189072	0.564369	-0.335014	0.737614	NA
snR190	3.83052	0.786486	0.724502	1.08555	0.277676	NA
YOR389W	463.103	0.075956	0.126567	0.600123	0.548424	NA
YLR130C	1752.15	-0.129868	0.129367	-1.00387	0.31544	0.998968
YER022W	661.085	0.0882416	0.145935	0.604664	0.545402	NA
YBR140C	1152.14	0.124073	0.233899	0.530456	0.595796	0.998968
YKR070W	733.728	-0.17516	0.121096	-1.44646	0.148049	NA
YGL262W	4.11845	-1.35377	0.82878	-1.63345	0.102375	NA
YMR205C	8716.38	0.0838812	0.108343	0.774221	0.4388	0.998968
YNL203C	78.1545	-0.154117	0.225643	-0.683016	0.494597	NA
YJL185C	168.775	-0.24135	0.195275	-1.23595	0.216477	NA
YNL022C	813.151	0.0592911	0.223613	0.26515	0.790894	NA
YML017W	657.426	0.0102531	0.110781	0.0925526	0.926259	NA
YKR087C	657.184	-0.100431	0.0744707	-1.3486	0.177465	NA
YOR232W	2352.22	0.183164	0.0567374	3.22828	0.00124537	0.0733256
[truncated: 4,327 more rows]

## Sheet: deseq.ripev.8h
	baseMean	log2FoldChange	lfcSE	stat	pvalue	padj
YAL008W	873.044	-0.165868	0.19277	-0.860445	0.389544	0.777429
YBR255W	778.929	-0.156986	0.100562	-1.56109	0.118503	0.533257
YGR164W	3.25772	0.422172	0.883685	0.477741	0.632835	NA
YGR131W	50.3801	0.568338	0.311952	1.82188	0.0684736	0.473356
YNL003C	644.338	-0.0216902	0.119986	-0.180773	0.856545	0.967165
YBR135W	456.314	0.0166748	0.139835	0.119247	0.90508	0.984408
YBR160W	847.341	0.0273616	0.0900229	0.30394	0.761174	0.939974
YJL082W	1306.67	-0.00114529	0.190468	-0.006013	0.995202	0.998608
YJL142C	382.435	-0.346749	0.265527	-1.30589	0.19159	0.622593
YPL191C	314.919	-0.0948571	0.158549	-0.598281	0.549653	0.855811
YGL215W	3005.87	-0.0145143	0.187179	-0.0775421	0.938192	0.987334
YKL074C	657.467	0.206276	0.135354	1.52397	0.127516	0.54296
YJL077C	15.5448	0.0591518	0.426154	0.138804	0.889605	0.978935
YKL096W-A	70337.2	-0.271868	0.182966	-1.48589	0.137308	0.557558
YIL124W	2672.85	-0.232361	0.160151	-1.45089	0.14681	0.57356
YPL039W	398.417	0.0343826	0.159601	0.215429	0.829433	0.962308
YNL170W	28.5313	0.177655	0.418946	0.424052	0.671528	0.906334
YGL141W	963.629	-0.0865626	0.152748	-0.566701	0.570918	0.862737
YJL179W	312.319	0.426152	0.184757	2.30655	0.0210798	0.353236
YDR316W-B	1638.86	0.268456	1.63457	0.164237	0.869545	0.969851
YKL083W	6.28318	-0.0480371	0.743336	-0.0646237	0.948474	0.988952
YBR152W	244.54	-0.00439797	0.189522	-0.0232056	0.981486	0.996206
YKL029C	1991.99	0.244905	0.30315	0.807869	0.419166	0.791202
YPL166W	328.151	-0.378404	0.165454	-2.28706	0.022192	0.355462
YKL052C	658.829	-0.12962	0.148951	-0.870223	0.384178	0.774325
YHR025W	3610.28	-0.124527	0.146039	-0.852692	0.39383	0.781852
YOL034W	587.325	0.195408	0.149613	1.30609	0.191522	0.622593
YBL008W	512.893	0.144869	0.168134	0.861627	0.388893	0.77683
YIL062C	1943.01	-0.19841	0.157258	-1.26168	0.207065	0.630192
YOL116W	567.076	-0.123038	0.106777	-1.15229	0.249203	0.664997
YDR196C	987.895	-0.158602	0.156312	-1.01465	0.310272	0.726429
YNL255C	2955.46	0.238915	0.151059	1.58161	0.113739	0.529927
YNR032W	615.25	-0.0833432	0.161558	-0.515872	0.605944	0.874835
YNR045W	816.374	-0.0634088	0.139855	-0.45339	0.650268	0.895791
YML105C	1207.8	-0.0157561	0.136039	-0.11582	0.907795	0.984467
YNL288W	750.026	-0.0623454	0.109491	-0.569411	0.569077	0.862148
YIL059C	233.934	-0.437124	0.179074	-2.44103	0.0146455	0.333814
YIL004C	478.784	0.0228263	0.135774	0.16812	0.866489	0.968541
YNR018W	2252.61	-0.00275002	0.158866	-0.0173103	0.986189	0.997463
YPL144W	296.221	-0.0430206	0.169907	-0.253201	0.800113	0.952426
YFR047C	1714.6	-0.255812	0.171007	-1.49592	0.134675	0.553869
YER087C-B	987.612	0.0839399	0.143066	0.586723	0.55739	0.857187
YHR078W	1008.61	-0.120166	0.128298	-0.936618	0.348955	0.752693
YJR115W	146.267	-0.225618	0.256886	-0.878281	0.379791	0.773755
YLR355C	11606.7	0.256038	0.324492	0.789043	0.430087	0.798695
YGR099W	696.028	-0.130364	0.135526	-0.961913	0.336093	0.744647
YLR300W	12921	-0.306872	0.288495	-1.0637	0.287464	0.705972
YCL028W	2185.04	-0.18629	0.13064	-1.42598	0.153875	0.582047
YJR140C	672.912	0.0931785	0.166056	0.561128	0.57471	0.863766
YOR033C	604.258	0.132516	0.151027	0.877432	0.380252	0.773838
YOR062C	172.042	-0.300691	0.23673	-1.27019	0.204018	0.6285
YBR043C	4754.29	-0.258613	0.691274	-0.37411	0.708322	0.916719
YHR112C	1878.55	-1.46153	0.583743	-2.50373	0.0122893	0.322753
YLR011W	263.488	-0.309111	0.139369	-2.21794	0.0265592	0.372012
YIL044C	785.812	0.0285495	0.100362	0.284466	0.776053	0.942497
YNL197C	1708.84	-0.0859209	0.128743	-0.667382	0.504528	0.842118
YKR103W	289.008	-0.0191852	0.277134	-0.0692269	0.944809	0.988263
YLR133W	1493.49	0.096084	0.182953	0.525184	0.599456	0.872052
YER121W	118.009	-0.398477	0.304978	-1.30657	0.191357	0.622593
YCR046C	634.13	0.243367	0.254972	0.954484	0.339839	0.746963
YNL144C	2389.88	-0.263633	0.208403	-1.26502	0.205865	0.6285
YKL204W	1219.7	-0.0815595	0.105687	-0.771708	0.440287	0.806079
YOR266W	456.551	0.288058	0.137318	2.09774	0.0359279	0.401582
YDR393W	444.433	0.129947	0.102753	1.26466	0.205993	0.6285
YGL171W	700.549	0.530227	0.222617	2.38179	0.0172288	0.343433
YPR194C	36346.4	-0.631522	0.527463	-1.19728	0.231197	0.649162
YGR019W	5512.26	-0.491705	0.639232	-0.769212	0.441768	0.807752
YBL033C	1089.62	0.0610753	0.0918918	0.664644	0.506278	0.842829
tE(UUC)G3	2.336	0.520246	1.05551	0.492887	0.622092	NA
YJL188C	17.3382	0.719382	0.542057	1.32713	0.184464	0.612797
YLL057C	94.8507	-0.4114	0.172921	-2.37911	0.0173543	0.343433
YPL060C-A	15.5481	-1.82974	0.709265	-2.57977	0.00988662	0.308919
YBR296C	64.7386	-0.366377	0.288353	-1.27059	0.203876	0.6285
YNL277W	1784.74	-3.12191	1.51077	-2.06644	0.038787	0.40633
YMR040W	187.848	0.223782	0.324268	0.690113	0.490123	0.833236
YDR077W	63406.9	-0.467476	0.2546	-1.83611	0.0663407	0.469958
YMR266W	4588.28	-0.170891	0.2114	-0.808379	0.418872	0.791202
YKR064W	788.217	0.0528524	0.179242	0.294866	0.768097	0.940914
YPL089C	1026.99	-0.296026	0.136493	-2.16881	0.0300971	0.383643
YGR277C	561.074	0.0184578	0.132624	0.139173	0.889313	0.978935
YDL139C	145.875	-0.186417	0.177494	-1.05027	0.293592	0.713165
YDR246W	632.474	0.00925316	0.137459	0.0673156	0.94633	0.988512
YOR288C	912.2	0.273905	0.202716	1.35117	0.17664	0.61013
YCR028C	661.549	0.108503	0.149976	0.72347	0.469391	0.822302
YML054C	915.852	-0.470457	0.205758	-2.28646	0.0222273	0.355462
YLR179C	4054.07	-0.545621	0.31537	-1.7301	0.0836129	0.493656
YOR141C	1194.42	-5.03073e-05	0.0870313	-0.000578037	0.999539	0.999618
YPL280W	51.6816	-0.224436	0.367793	-0.610224	0.541713	0.854258
YBL106C	444.231	0.298249	0.163712	1.82178	0.068488	0.473356
YGL044C	500.737	-0.0681405	0.15989	-0.426172	0.669983	0.905836
YER107C	705.653	0.145129	0.150642	0.963403	0.335345	0.744374
YBR038W	1733.65	0.0387068	0.158987	0.243459	0.80765	0.954424
YER076W-A	3.54634	-0.142807	0.97956	-0.145786	0.88409	0.977004
YGR259C	12.6022	-0.0239196	0.484578	-0.0493617	0.960631	0.992304
YEL047C	1781.79	-0.331993	0.149579	-2.21952	0.0264514	0.372012
YPR016C	1931.4	0.217316	0.16908	1.28528	0.198694	0.628325
YOR208W	585.966	0.0637392	0.156827	0.40643	0.684427	0.910664
YDL055C	29451.5	0.0699276	0.154557	0.452439	0.650953	0.895924
YML009C	401.548	0.590578	0.273848	2.15659	0.0310378	0.386928
YML072C	4917.73	-0.13403	0.163283	-0.820843	0.411736	0.788955
YDR142C	597.345	-0.059559	0.109087	-0.545978	0.585081	0.867432
YFL044C	946.276	-0.0611402	0.162525	-0.376188	0.706777	0.916719
RDN37-2	1.71435	-0.148811	3.31899	-0.0448363	0.964238	NA
YEL011W	11435.6	-0.721674	0.434722	-1.66008	0.096898	0.513391
YKL019W	1285.75	0.0111157	0.138777	0.0800978	0.936159	0.987334
YJL130C	9007.45	0.504808	0.234685	2.151	0.0314763	0.387444
YBL085W	2013.28	-0.0351227	0.0785732	-0.447005	0.654871	0.899083
YBR116C	23.7464	-0.307505	0.514122	-0.598116	0.549763	0.855811
YDR166C	1183.17	-0.0351179	0.174114	-0.201695	0.840155	0.965453
YDR082W	539.851	-0.00753818	0.139405	-0.0540741	0.956876	0.99137
YDR348C	1564.28	-0.140526	0.122345	-1.1486	0.25072	0.665785
YKL182W	17127.2	0.245396	0.166916	1.47017	0.141515	0.568393
YKL018C-A	318.057	-0.102765	0.159449	-0.644502	0.51925	0.848722
YPL027W	2.74529	0.825873	0.941277	0.877397	0.380271	NA
YKL135C	1686.58	0.0347027	0.120242	0.288608	0.772881	0.941268
YLR363C	272.611	0.088959	0.153715	0.578728	0.562772	0.860507
YEL077W-A	5.36257	-0.329739	0.826326	-0.399042	0.689862	0.911761
YDR179C	224.198	0.0770405	0.374971	0.205457	0.837215	0.964567
YML089C	11.2685	-0.890673	0.584447	-1.52396	0.127519	0.54296
YLR431C	341.461	-0.178599	0.164565	-1.08528	0.277795	0.697503
YKR046C	1733.63	-0.630291	0.251053	-2.51059	0.012053	0.322102
YJR005W	1519.86	0.12043	0.124324	0.968677	0.332706	0.743024
YJL116C	698.82	-0.0732398	0.199274	-0.367532	0.713222	0.918745
YMR030W	534.263	0.102573	0.165265	0.620661	0.534823	0.852987
YER030W	1234.94	0.149983	0.182287	0.822789	0.410628	0.788955
YIR026C	731.611	0.187925	0.0987181	1.90366	0.0569549	0.449714
YJR072C	1556.41	0.155496	0.1014	1.53349	0.125156	0.539989
YDR515W	383.845	0.574773	0.178134	3.22663	0.00125259	0.152457
YKR039W	60368.3	-0.478979	0.561858	-0.852492	0.393941	0.781852
YGL003C	922.549	-0.0514015	0.106887	-0.480897	0.63059	0.884297
YPL009C	1656.26	0.151537	0.163541	0.926602	0.354133	0.75843
YDR268W	356.483	0.320454	0.220755	1.45163	0.146605	0.57356
YGL192W	4.46646	-0.667614	0.656503	-1.01692	0.30919	0.725981
YDL117W	819.778	0.0829739	0.17222	0.48179	0.629955	0.884201
YMR131C	2347.06	0.243734	0.182998	1.33189	0.182895	0.61195
YMR293C	479.44	0.0166442	0.140802	0.11821	0.905901	0.984467
YJL214W	16.4658	0.128929	0.416141	0.309821	0.756697	0.938631
YIL105C	1246.95	-0.0506889	0.141319	-0.358684	0.719831	0.920641
YML126C	3278.97	-0.0853131	0.122858	-0.694403	0.48743	0.831907
YLR189C	1967.54	-0.322515	0.212036	-1.52103	0.128251	0.544175
YIL150C	199.945	0.00828132	0.196627	0.0421169	0.966405	0.993884
YLR349W	15.227	0.598657	0.472508	1.26698	0.205163	0.6285
YGL250W	331.04	-0.0214505	0.177884	-0.120587	0.904018	0.98378
YBR212W	2271.85	-0.297171	0.105786	-2.80916	0.00496707	0.289946
YJR109C	10308.8	-0.278829	0.471342	-0.591564	0.554143	0.855811
YLR254C	410.383	-0.108741	0.199748	-0.544389	0.586174	0.868581
YGR085C	5594.41	0.400422	0.190769	2.09899	0.0358174	0.40138
YPL105C	2467.29	0.0237245	0.124258	0.190929	0.848581	0.966859
YGR145W	1167.12	0.36338	0.208428	1.74343	0.0812578	0.492901
YJR094C	186.294	0.0243217	0.256942	0.0946582	0.924586	0.986591
YKL177W	13.0109	0.185656	0.411602	0.451058	0.651948	0.896876
YGL154C	289.768	-0.244781	0.154218	-1.58723	0.11246	0.529927
YBR129C	868.964	0.0596406	0.117246	0.508678	0.610978	0.876236
tK(UUU)D	4.56696	-0.117848	0.687106	-0.171514	0.86382	0.968541
YMR322C	5.88508	0.14822	0.668762	0.221634	0.824599	0.960298
YKL099C	520.224	0.324806	0.246404	1.31818	0.187443	0.616346
YDR315C	264.909	0.137479	0.185381	0.741605	0.458327	0.818615
YLR394W	483.038	0.185169	0.203131	0.911572	0.361994	0.762504
YNL104C	8393.11	-0.335242	0.294351	-1.13892	0.254736	0.672234
YNL151C	686.613	0.356783	0.149217	2.39103	0.0168014	0.342884
YNR066C	151.71	-0.182135	0.210223	-0.866388	0.386277	0.774553
YLR220W	1563.22	0.0695181	0.101635	0.683999	0.493976	0.836519
YHR006W	1548.83	-0.182452	0.17746	-1.02813	0.30389	0.723
YMR232W	58.0135	0.110356	0.265676	0.415378	0.677865	0.90809
YNL083W	644.715	0.00730858	0.139587	0.0523585	0.958243	0.991891
YGR038C-B	1349.4	-0.584427	0.564741	-1.03486	0.300735	0.721126
YMR238W	2244.47	-0.196347	0.12291	-1.59748	0.110158	0.526116
YER168C	706.141	0.132745	0.107153	1.23884	0.215406	0.634348
YPL265W	14810.5	-0.517222	0.788336	-0.656093	0.511764	0.843366
YOR227W	2587.66	-0.342794	0.194475	-1.76267	0.077957	0.488191
YOR081C	1630.64	-0.184959	0.130599	-1.41624	0.156706	0.583418
YEL026W	2175.6	0.548699	0.197895	2.77267	0.00555982	0.29102
YGR050C	100.846	-0.0872376	0.21617	-0.403559	0.686537	0.911542
YDR021W	225.615	0.344668	0.2705	1.27419	0.202597	0.6285
YGL063W	292.245	0.177335	0.172197	1.02984	0.303087	0.722217
YPL212C	1361	0.167068	0.310195	0.53859	0.59017	0.868825
YOL157C	107.12	-0.0260361	0.259636	-0.100279	0.920123	0.985934
YOR345C	1.65076	-0.693776	1.37792	-0.503494	0.614617	NA
YPR095C	1223.3	-0.0374994	0.10757	-0.348606	0.727385	0.923758
YOR310C	3539.02	0.584248	0.18801	3.10754	0.00188653	0.191577
YDR188W	4216.43	0.0708709	0.122283	0.579565	0.562208	0.86047
YOL128C	494.779	-0.39356	0.537187	-0.732632	0.463783	0.820948
YGL236C	445.258	0.48354	0.323576	1.49436	0.135081	0.553869
YHR133C	875.773	0.200191	0.134775	1.48537	0.137445	0.557558
YDR017C	1582.24	-0.0712127	0.12825	-0.555264	0.578714	0.864324
YIL090W	1081.2	0.145312	0.158017	0.919601	0.357781	0.759833
YBR183W	522.606	-0.10925	0.291093	-0.375309	0.70743	0.916719
YOL048C	997.443	-0.205646	0.203648	-1.00981	0.312586	0.727497
YML039W	17.8962	2.73336	1.81581	1.50531	0.132245	0.552651
YCR007C	203.871	-0.201117	0.162898	-1.23462	0.216972	0.635583
YDR540C	98.2066	0.120883	0.283981	0.425674	0.670346	0.905836
YEL004W	345.717	0.292495	0.229235	1.27596	0.201969	0.6285
YPR057W	783.292	-0.0788783	0.154611	-0.510172	0.609931	0.875589
YLL032C	541.212	0.043976	0.20831	0.211109	0.832802	0.963407
YDR116C	745.895	0.378887	0.20683	1.83187	0.0669702	0.470265
YPL119C-A	67.323	-0.0551434	0.451539	-0.122123	0.902801	0.983451
YDR299W	528.244	0.553512	0.342847	1.61446	0.106428	0.522433
YLR030W	55.2989	-0.85254	0.302035	-2.82265	0.00476281	0.289946
YDR122W	2126.89	-0.132268	0.107083	-1.23519	0.216759	0.635538
YOL062C	1711.71	-0.0973687	0.135258	-0.719873	0.471603	0.82349
YNL234W	216.202	-0.569482	0.255554	-2.22843	0.0258521	0.371503
YLR467W	2784	-0.149872	0.164371	-0.911788	0.36188	0.762504
YJL194W	184.362	0.379012	0.260142	1.45694	0.145132	0.573416
YOL015W	246.135	-0.151476	0.179619	-0.843318	0.399051	0.784331
YDL070W	6134.29	0.188922	0.252944	0.746895	0.455127	0.816249
YOR241W	984.702	0.0240999	0.124475	0.193613	0.846479	0.96659
YLR056W	6115.71	-0.0148629	0.218948	-0.0678833	0.945879	0.988263
YPR039W	1.4244	0.974209	1.19452	0.815566	0.414749	NA
YMR054W	1845.64	-0.0111105	0.120222	-0.0924169	0.926367	0.986591
YKL110C	783.348	0.148529	0.184009	0.807186	0.419559	0.791202
YML100W-A	4.19789	0.186265	0.728185	0.255793	0.798111	0.952426
YPR070W	675.815	0.0616523	0.129931	0.474501	0.635143	0.887333
YLR204W	598.453	0.453638	0.219454	2.06712	0.0387224	0.40633
YML097C	642.058	0.098047	0.106284	0.9225	0.356268	0.759137
YKR007W	666.764	0.0433825	0.122867	0.353086	0.724024	0.922225
YDL096C	2.09141	-0.0372323	1.18375	-0.0314529	0.974908	NA
YHR193C	7027.12	0.266463	0.145797	1.82762	0.067606	0.471848
YBL099W	13894.4	-0.237973	0.162697	-1.46268	0.143556	0.572063
YJR035W	586.325	-0.208818	0.117886	-1.77135	0.0765022	0.488191
YOR126C	337.096	-0.0224903	0.139312	-0.161439	0.871747	0.970679
YMR023C	322.63	0.223211	0.112621	1.98197	0.0474824	0.426295
YOR119C	1635.48	0.176454	0.167688	1.05227	0.292674	0.712838
YNL196C	5.71392	-0.0814962	0.621235	-0.131184	0.89563	0.981135
YNL187W	274.459	-0.171528	0.137943	-1.24347	0.213696	0.633171
YMR141C	2.47066	1.20031	0.95577	1.25586	0.209168	NA
YLL014W	682.689	0.305751	0.185735	1.64617	0.0997295	0.518474
YCR061W	549.512	-0.363888	0.220454	-1.65063	0.098814	0.51769
YPR115W	2475.57	-0.236095	0.170181	-1.38731	0.165346	0.598606
YHR088W	939.167	0.208243	0.22607	0.921146	0.356974	0.759137
YBR017C	1162.35	0.156885	0.138946	1.1291	0.258854	0.679533
YPR162C	506.118	0.065343	0.130426	0.500998	0.616373	0.878831
YGR166W	459.397	0.172417	0.146341	1.17819	0.238722	0.656315
YDL161W	1518.13	-0.110264	0.0911665	-1.20948	0.226478	0.644527
YKL050C	282.073	-0.141189	0.176852	-0.798346	0.42467	0.794345
YJR055W	88.1246	0.15647	0.229571	0.681577	0.495506	0.838524
YGL099W	1177.67	0.387809	0.171681	2.25889	0.0238904	0.361202
YFL030W	1652.95	-0.827372	0.204349	-4.04882	5.14775e-05	0.0265513
YIL119C	1839.76	-0.0470796	0.250458	-0.187974	0.850897	0.967116
YPL193W	580.099	0.185417	0.12755	1.45368	0.146034	0.573453
YNL005C	1495.14	0.24609	0.145989	1.68567	0.0918585	0.500659
YJL144W	516.057	-0.134277	0.727304	-0.184623	0.853525	0.967165
YBR012W-B	454.191	0.319414	0.210387	1.51822	0.128958	0.545762
YLR379W	2.33936	2.34437	1.10947	2.11305	0.0345961	NA
YJR139C	6769.54	-0.705191	0.299573	-2.35399	0.0185731	0.347498
YBR133C	1184	0.0515864	0.134496	0.383554	0.701309	0.915557
YBR162C	17769.3	0.0441439	0.142126	0.310597	0.756107	0.938465
YNL331C	255.996	-0.107193	0.174219	-0.615275	0.538373	0.853439
YJL079C	13648	-0.480879	0.350584	-1.37165	0.170172	0.603413
YGL019W	1363.47	-0.126533	0.103138	-1.22683	0.219886	0.638209
YGR201C	376.703	-0.248231	0.165558	-1.49935	0.133782	0.553869
YNL172W	715.389	0.0101159	0.133759	0.0756276	0.939715	0.987334
YNL058C	630.843	-0.143717	0.173284	-0.829371	0.406895	0.788955
YPL160W	4040.57	0.306659	0.165402	1.85403	0.063735	0.464519
YNL023C	866.417	0.135269	0.114204	1.18445	0.236236	0.654289
YDR214W	3880.19	-0.0053471	0.705643	-0.00757763	0.993954	0.998215
YLR222C	1021.28	0.54864	0.255266	2.14929	0.0316117	0.388327
YLR295C	2148.25	-0.138197	0.163431	-0.845601	0.397775	0.783844
YER175W-A	9.25881	-0.373641	0.657705	-0.568098	0.569968	0.862148
YHR168W	353.656	0.0828087	0.168312	0.491995	0.622723	0.881741
YOR064C	424.326	-0.0223564	0.104671	-0.213587	0.830869	0.962913
YOR159C	404.491	0.00640404	0.159399	0.0401761	0.967953	0.994017
YOL081W	1767.97	-0.0725821	0.313575	-0.231466	0.816953	0.957986
YOL036W	1809.33	0.0247982	0.122104	0.203091	0.839064	0.964925
YGL148W	4291.91	0.00985634	0.181672	0.0542536	0.956733	0.99137
YOR031W	535.211	-0.732979	0.257906	-2.84205	0.00448251	0.287494
YBR282W	455.43	0.309162	0.192581	1.60536	0.108416	0.524556
YDR194C	2045.95	0.622714	0.188285	3.3073	0.000942016	0.140639
YOL114C	80.0627	-0.0228475	0.270622	-0.0844256	0.932718	0.987126
YGR084C	688.161	0.478086	0.216427	2.209	0.0271747	0.372376
YNR030W	1082.57	0.193904	0.106651	1.81811	0.0690478	0.47484
YAL037C-A	6.72805	0.492989	0.616643	0.799473	0.424016	0.794307
YML007C-A	7.19762	-0.131597	0.539783	-0.243796	0.807389	0.954423
YBR018C	80646.5	0.116248	0.208006	0.558867	0.576253	0.864324
YKL076C	126.704	0.19818	0.171537	1.15532	0.247958	0.6638
YDR466W	1124.36	-0.0689328	0.103322	-0.667166	0.504666	0.842118
YFR045W	429.113	-0.0400183	0.224535	-0.178227	0.858544	0.967378
YIL002C	990.705	-0.103669	0.103024	-1.00626	0.314293	0.728468
YGR159C	5274.74	0.451055	0.348566	1.29403	0.195655	0.624803
YLR369W	826.763	-0.108827	0.090677	-1.20016	0.230077	0.647564
YFR032C	15.9362	0.531508	0.454238	1.17011	0.241958	0.658618
YNL118C	2465.31	0.00392029	0.115802	0.0338534	0.972994	0.994017
YGL228W	2568.21	-0.0299957	0.0871648	-0.344127	0.730751	0.925693
YJR117W	2181.29	0.327486	0.210953	1.55241	0.120564	0.53354
YBR196C-A	11.4132	0.0227747	0.4859	0.0468711	0.962616	0.992423
YBR196C-B	10.4122	-0.0259487	0.485481	-0.0534494	0.957374	0.991617
YIL030W-A	56.4173	-0.15654	0.209931	-0.745677	0.455862	0.816452
YLR357W	1329.93	0.112199	0.117882	0.951792	0.341202	0.74709
YER127W	304.242	0.484562	0.298452	1.62358	0.104465	0.522399
YBL015W	2684.19	-0.751222	0.18961	-3.96193	7.43478e-05	0.030793
YLR017W	992.606	0.165847	0.143389	1.15663	0.247425	0.662691
YHR110W	1256.08	-0.183124	0.129365	-1.41556	0.156903	0.583646
YBR041W	1574.57	-0.0379786	0.106981	-0.355003	0.722587	0.922225
YOR394W	19.4115	-0.268146	0.389407	-0.688601	0.491074	0.833956
YDL220C	366.849	-0.113122	0.142723	-0.792599	0.428011	0.79654
YDL039C	234.285	-0.226703	0.231016	-0.981329	0.32643	0.735034
YKL202W	36.8339	-1.22376	0.59458	-2.0582	0.0395714	0.407967
YGR122C-A	19.3539	-0.199602	0.555458	-0.359346	0.719336	0.920641
YOR264W	1077.29	-0.0165973	0.18999	-0.0873591	0.930386	0.986591
YNL042W-B	1.96252	-0.378485	0.969847	-0.390252	0.69635	NA
YBL029C-A	704.287	-0.270493	0.247831	-1.09144	0.275079	0.696434
YOR008W-B	10.8366	-0.216749	0.493066	-0.439595	0.660231	0.901558
YOR366W	35.1416	-0.0814153	0.348921	-0.233335	0.815501	0.957598
YNL275W	330.777	0.382291	0.216987	1.76182	0.0780996	0.488191
YAR015W	6392.67	-0.36802	0.390945	-0.941359	0.346521	0.752693
YOR384W	31.3363	0.921177	0.412847	2.23128	0.0256626	0.369651
YLL051C	1129.05	-0.126074	0.154986	-0.813451	0.41596	0.791202
YDR427W	2125.68	0.169226	0.216902	0.780194	0.435277	0.802949
YLR079W	2143.79	-0.212682	0.228734	-0.929822	0.352463	0.756557
YLR408C	109.257	0.370922	0.227257	1.63217	0.102644	0.521725
YMR093W	554.508	0.542101	0.327111	1.65724	0.0974717	0.514578
YDR079W	371.409	0.211829	0.225297	0.940218	0.347106	0.752693
YMR268C	276.266	0.0806245	0.216882	0.371743	0.710084	0.917366
YOR169C	1.5522	-0.498767	1.14888	-0.434134	0.664191	NA
YML070W	3105.57	-0.264363	0.147715	-1.78968	0.0735051	0.482063
YHR175W-A	130.825	-0.178023	0.271553	-0.655572	0.5121	0.843366
YPR072W	1840.13	-0.0360688	0.111323	-0.324002	0.745936	0.933263
YMR108W	6553.94	-0.00882174	0.188071	-0.0469065	0.962588	0.992423
YCR091W	1100.89	-0.435516	0.262021	-1.66214	0.0964838	0.512534
YER062C	781.184	0.0147212	0.203612	0.0723003	0.942363	0.988252
YDR244W	696.486	0.122216	0.174089	0.702031	0.48266	0.829576
YER189W	128.497	-0.0648572	0.176026	-0.368451	0.712537	0.918639
YDL137W	5930.35	-0.0845208	0.131672	-0.641902	0.520937	0.848908
YGR271W	941.569	0.0744992	0.159641	0.466667	0.640738	0.890312
YDR233C	6845.93	0.103148	0.139368	0.740113	0.459231	0.819115
YGR071C	809.167	-0.0804548	0.217311	-0.370228	0.711212	0.918097
YCR106W	385.847	-0.123574	0.128126	-0.964471	0.33481	0.744163
YBL100C	3.85179	-0.229239	0.917381	-0.249885	0.802677	0.952426
YER109C	881.311	0.0842852	0.101778	0.828131	0.407596	0.788955
YDR489W	231.299	-0.0161622	0.215125	-0.0751293	0.940112	0.987334
YPR049C	656.266	-0.0539516	0.219101	-0.246241	0.805496	0.953821
YDL057W	363.856	-0.262394	0.178975	-1.46609	0.142623	0.570959
YGR257C	711.925	0.249289	0.160524	1.55297	0.12043	0.53354
YEL045C	7.45791	-0.151246	0.50916	-0.29705	0.766429	0.940914
YPL235W	1736.84	0.110869	0.0849947	1.30442	0.192091	0.622593
YLR122C	24.6758	-0.381	0.375643	-1.01426	0.310458	0.726429
YLR155C	18986	-0.690483	0.45078	-1.53175	0.125584	0.539989
YBL087C	3372.6	0.435741	0.218185	1.99712	0.0458123	0.426295
YJL132W	422.758	-0.32429	0.130666	-2.48181	0.0130716	0.326863
YGL190C	1344.96	-0.0308457	0.144925	-0.21284	0.831452	0.963137
YBR110W	1245.26	0.0244739	0.101245	0.24173	0.80899	0.955081
YDR144C	501.432	0.6395	0.273603	2.33733	0.0194221	0.347498
YFL046W	674.778	-0.110229	0.0995944	-1.10678	0.268388	0.690869
YOR103C	642.618	0.207334	0.247134	0.838957	0.401493	0.785077
YKL137W	549.912	0.437791	0.232907	1.87968	0.0601515	0.456887
YDR447C	3996.13	0.625537	0.230045	2.71919	0.00654416	0.29102
YGL009C	4506.49	0.338752	0.166265	2.03742	0.0416081	0.41607
YPR145W	13190.5	0.0760293	0.335228	0.226799	0.82058	0.959942
YJL063C	1002.21	0.31194	0.251236	1.24162	0.214377	0.633288
YMR149W	2208.5	0.103483	0.154727	0.668811	0.503616	0.84203
YIR010W	931.336	-0.0975559	0.144673	-0.674319	0.500109	0.841361
YDR331W	702.415	0.183199	0.122122	1.50013	0.133581	0.553869
YJL114W	11.8558	-0.283491	0.822564	-0.344643	0.730362	0.925693
YKR044W	524.257	-0.251593	0.253466	-0.992608	0.320901	0.734283
YLR433C	801.304	0.106302	0.130288	0.815897	0.414559	0.790582
YMR068W	157.072	0.00839424	0.159118	0.0527546	0.957927	0.991784
YLR157C-B	19.6783	-3.06555	1.73565	-1.76623	0.0773573	0.488191
YNL164C	248.505	0.189355	0.248807	0.761054	0.446625	0.810564
YER032W	920.799	-0.0655844	0.154589	-0.424249	0.671384	0.906334
YJR070C	2095.56	0.438216	0.190901	2.29551	0.0217041	0.353236
YGL005C	1040.33	0.0291764	0.128507	0.227041	0.820392	0.959942
YHR043C	1617.27	0.47524	0.348764	1.36264	0.172996	0.60544
YDL111C	662.962	0.192301	0.138009	1.39339	0.163501	0.595463
YMR133W	8.00829	-1.12442	0.800829	-1.40407	0.160299	0.586959
YPL007C	624.919	-0.0223194	0.163189	-0.136771	0.891212	0.979465
YKL159C	273.778	0.0170585	0.13536	0.126024	0.899713	0.983033
YDR507C	1928.52	0.156345	0.209948	0.744683	0.456463	0.816905
YLR138W	2398.12	-0.114558	0.118093	-0.97007	0.332011	0.742586
YBR101C	2762.23	0.181083	0.810178	0.22351	NA	NA
YLR396C	533.872	0.160259	0.0913375	1.75458	0.0793318	0.489934
YBR245C	1411.68	0.00916884	0.119553	0.0766927	0.938868	0.987334
YJL216C	118.15	-0.109253	0.175438	-0.622746	0.533451	0.852148
YBR210W	452.768	0.0961841	0.164068	0.586245	0.557711	0.857248
YPL103C	546.456	0.173189	0.171092	1.01225	0.311417	0.727299
YIL103W	404.655	0.517043	0.252383	2.04864	0.0404972	0.411824
YIL152W	460.234	-0.321405	0.125664	-2.55765	0.0105381	0.309967
YJR096W	1198.07	-0.600833	0.302735	-1.98468	0.04718	0.426295
YAL010C	463.422	-0.026255	0.13389	-0.196094	0.844537	0.966131
YGR143W	2598.87	-0.300336	0.189742	-1.58286	0.113453	0.529927
YGR112W	605.378	0.0025617	0.196516	0.0130355	0.989599	0.997621
YLR256W	5903.14	-0.010763	0.257904	-0.0417325	0.966712	0.993884
YHR174W	67849.6	-0.0424013	0.207886	-0.203964	0.838382	0.964676
YOR012W	66.0613	-0.269602	0.245583	-1.09781	0.272289	0.694819
YIR001C	841.147	-0.256557	0.100906	-2.54255	0.0110048	0.311703
YDL213C	1006.83	0.33225	0.123589	2.68835	0.00718064	0.29102
YDR317W	42.6256	0.244776	0.349124	0.701117	0.48323	0.829761
YDR478W	152.555	0.0968368	0.146587	0.660611	0.508862	0.843366
YKL097C	1.26998	-1.2783	1.31664	-0.970878	0.331609	NA
YNL106C	447.72	0.146561	0.175872	0.83334	0.404653	0.787402
YOR378W	15.0801	0.140953	0.402371	0.350305	0.72611	0.923052
YFR015C	7042.34	-0.24898	0.678808	-0.366789	0.713776	0.919096
YMR230W	3934.6	0.493721	0.197066	2.50536	0.0122325	0.322753
YIL092W	370.235	0.0131377	0.208573	0.0629885	0.949776	0.988952
YAR009C	14409.8	0.0518361	0.352158	0.147195	0.882978	0.976501
YLR321C	789.688	0.00425223	0.127679	0.0333041	0.973432	0.994017
YBR004C	620.184	0.115681	0.250127	0.462488	0.643731	0.892656
YGR052W	696.573	-0.63208	0.580183	-1.08945	0.275956	0.696434
YJR161C	574.634	-0.488052	0.176891	-2.75906	0.00579684	0.29102
YOR278W	440.436	0.102847	0.101896	1.00933	0.312816	0.727755
YNL085W	2332.17	0.187192	0.202548	0.924185	0.35539	0.759137
YGL061C	376.947	0.0878008	0.205556	0.427139	0.669278	0.905836
YPL210C	1912.42	0.223614	0.12431	1.79885	0.0720425	0.481902
YOR087W	1304.76	-0.00259669	0.0857802	-0.0302715	0.975851	0.994436
YGL234W	8660.43	-0.194816	0.345161	-0.564421	0.572468	0.862737
YOR347C	1034	-0.0773714	0.313513	-0.246789	0.805072	0.953821
YPR093C	274.451	-0.31971	0.161253	-1.98266	0.0474055	0.426295
YAL029C	1619.85	0.245541	0.140084	1.75281	0.0796343	0.489934
YOL155C	2574.41	-1.71977	0.661822	-2.59854	0.00936202	0.30406
YDR421W	749.12	-0.235579	0.14631	-1.61013	0.107369	0.523776
YGR186W	2314.97	-0.108918	0.0641263	-1.69849	0.0894158	0.499826
YDR294C	2133.52	-0.189217	0.126578	-1.49487	0.134949	0.553869
YHR135C	2727.49	-0.121934	0.0974064	-1.25181	0.21064	0.632849
YBR181C	8558.82	0.327629	0.191625	1.70974	0.0873142	0.49753
YOR078W	638.81	0.345672	0.225698	1.53157	0.125628	0.539989
YOR243C	1664.34	0.41674	0.173863	2.39695	0.0165324	0.342884
YMR165C	983.147	-0.197864	0.133121	-1.48634	0.137189	0.557558
YCR005C	4297.11	-1.00743	0.312101	-3.22791	0.00124698	0.152457
YPR055W	790.086	0.0556425	0.186115	0.298968	0.764965	0.940914
YIL016W	655.743	0.0895464	0.150178	0.596268	0.550996	0.855811
YLR032W	578.959	0.0498637	0.171987	0.289927	0.771872	0.941197
YDR114C	2.69042	-0.958357	1.13846	-0.841803	0.399898	NA
YPR046W	184.894	0.018607	0.199143	0.0934353	0.925558	0.986591
YBR099C	95.6477	-0.107506	1.03271	-0.104101	0.917089	0.985934
YBL027W	11276.5	0.299357	0.174639	1.71415	0.0865016	0.496305
YOL060C	2014.59	-0.0718882	0.173158	-0.41516	0.678025	0.90809
YIR018C-A	1.88724	0.297346	0.963383	0.308648	0.757589	NA
YOR382W	286.991	-0.122603	0.189032	-0.648585	0.516607	0.846744
YNL232W	631.261	0.157866	0.137813	1.14551	0.251997	0.667282
YDL076C	721.639	-0.136514	0.105035	-1.2997	0.193704	0.624133
YDR120C	1339.8	0.279147	0.181185	1.54068	0.123395	0.538678
YLR465C	38.005	0.0512125	0.291729	0.175548	0.860649	0.967912
YJL192C	1367.32	0.176224	0.1409	1.25071	0.211041	0.632849
YEL020C-B	1.37525	1.42937	1.30222	1.09764	0.272361	NA
YLR054C	93.5649	-0.274913	0.28928	-0.950336	0.341942	0.74709
YLR009W	1277.64	0.323348	0.259651	1.24532	0.213014	0.633119
YKL116C	728.479	-0.0228307	0.132837	-0.17187	0.863539	0.968541
YOR292C	504.075	-0.243466	0.185226	-1.31443	0.188703	0.619051
YLR423C	412.741	-0.0337325	0.145587	-0.2317	0.816771	0.957957
YLR105C	609.828	0.0133373	0.111217	0.119922	0.904545	0.984036
YML091C	1994.49	0.404764	0.317594	1.27447	0.202497	0.6285
YHR191C	178.285	-0.0905865	0.171627	-0.527812	0.59763	0.872052
YDL098C	200.18	0.108417	0.141219	0.767717	0.442655	0.807752
YLR202C	55.7698	0.348243	0.319628	1.08952	0.275923	0.696434
YKR005C	130.961	0.342013	0.173103	1.97578	0.0481796	0.426295
YMR143W	6125	0.394173	0.196929	2.0016	0.0453276	0.425372
YCR063W	84.577	0.0089288	0.278428	0.0320686	0.974417	0.994327
YNL189W	3526.47	-0.00427763	0.102794	-0.0416137	0.966807	0.993884
YFR024C-A	2064.76	-0.164751	0.155829	-1.05726	0.290393	0.709734
YCL047C	337.435	0.143099	0.16055	0.891305	0.372765	0.767485
YGL122C	1980.31	-0.183602	0.180187	-1.01895	0.308228	0.725981
YDL018C	448.037	0.0762187	0.115303	0.661027	0.508595	0.843366
YOR120W	22943.6	-0.131187	0.306239	-0.428382	0.668373	0.905739
YPR160W	10854.2	-0.757677	0.50485	-1.5008	0.133408	0.553869
YBL060W	436.861	0.101246	0.138127	0.732991	0.463564	0.820948
YDR065W	204.212	0.102505	0.163162	0.628243	0.529845	0.851984
YBR019C	140425	0.0668256	0.166707	0.400856	0.688526	0.911761
YKL056C	11576.3	0.404889	0.211125	1.91776	0.055141	0.445589
YKL065W-A	39.3032	-0.308797	0.329315	-0.937694	0.348402	0.752693
YGR160W	7.18347	1.00886	0.769784	1.31057	0.190004	0.621413
YPL068C	268.381	0.0405666	0.214047	0.189522	0.849683	0.966859
YJR057W	452.849	0.134203	0.139293	0.963461	0.335316	0.744374
YGL211W	797.145	0.0356306	0.108417	0.328644	0.742425	0.931356
YFL032W	9.30891	0.703725	0.551999	1.27487	0.202356	0.6285
YPL195W	1614.04	0.0262294	0.148654	0.176446	0.859943	0.967912
YCL044C	688.063	0.0819135	0.131018	0.625207	0.531835	0.852083
YAL059W	332.409	0.551218	0.278735	1.97757	0.0479772	0.426295
YNL007C	9324.82	-0.0330682	0.485349	-0.0681327	0.94568	0.988263
YPL148C	143.35	0.0423364	0.212206	0.199506	0.841867	0.965453
YJR137C	8812.53	-2.55516	1.22955	-2.07812	0.0376983	0.403898
YMR021C	566.282	-0.0716212	0.135903	-0.527003	0.598191	0.872052
YMR074C	805.404	0.0245903	0.141891	0.173304	0.862412	0.968541
YGR203W	295.622	-0.138187	0.157628	-0.876665	0.380668	0.773838
YJR039W	613.936	-0.208708	0.234638	-0.889491	0.373739	0.767485
YDL158C	77.8328	0.393132	0.44902	0.875534	0.381284	0.773838
YOR104W	419.276	-0.195528	0.123468	-1.58363	0.113277	0.529927
YFL009W	1317.04	-0.131766	0.0899536	-1.46482	0.142969	0.57197
YLR297W	257.123	-0.37971	0.344051	-1.10364	0.269747	0.692516
YLR279W	1.73189	1.31402	1.52496	0.861678	0.388865	NA
YDR216W	2868.01	0.316302	0.617754	0.51202	0.608637	0.874835
YIL120W	326.731	0.128006	0.155636	0.822471	0.410809	0.788955
YBR030W	651.213	0.313084	0.154071	2.03207	0.0421469	0.416436
YPL162C	424.258	-0.0233817	0.123352	-0.189552	0.84966	0.966859
YGR095C	526.889	0.179626	0.161566	1.11178	0.266232	0.688811
YCL027W	252.645	0.52928	0.323147	1.63789	0.101444	0.519268
snR5	14.157	0.572009	0.535773	1.06763	0.285686	0.703592
snR4	38.7926	0.318649	0.285707	1.1153	0.264722	0.686653
snR9	17.389	0.228506	0.36391	0.627919	0.530057	0.851984
snR8	5.88056	0.168011	0.673778	0.249356	0.803085	0.952556
YHR029C	2448.52	-0.391981	0.663413	-0.590855	0.554618	0.855811
YIR021W-A	1.17672	0.546839	1.32819	0.411718	0.680546	NA
YAL033W	466.396	-0.00772532	0.195812	-0.0394527	0.968529	0.994017
YNL130C	2080.89	0.267236	0.136662	1.95546	0.0505289	0.431194
YNR036C	1371.58	0.110671	0.237644	0.4657	0.641431	0.890665
YNR049C	531.652	0.00555918	0.171306	0.0324517	0.974112	0.994181
YDR192C	379.335	-0.0736639	0.177283	-0.415515	0.677765	0.90809
YOL112W	1184.01	-0.097764	0.0923121	-1.05906	0.289573	0.708581
YML109W	550.35	0.118218	0.205558	0.575108	0.565218	0.860989
YOL083W	702.379	-0.392044	0.197	-1.99007	0.0465831	0.426295
YNL251C	1487.3	-0.134987	0.256893	-0.525459	0.599264	0.872052
YBL004W	1703.63	0.318478	0.265374	1.20011	0.230096	0.647564
YER145C-A	2.42054	-0.570568	1.05378	-0.541449	0.588198	NA
YBR164C	948.783	0.157725	0.1502	1.0501	0.29367	0.713165
YHR074W	2511.71	-0.170904	0.117397	-1.45577	0.145455	0.573453
YDR464W	1044.26	-0.058648	0.160673	-0.365016	0.7151	0.919608
YFR030W	8527.44	-2.75334	1.19317	-2.30757	0.021023	0.353236
YJL146W	629.065	-0.0229423	0.105303	-0.21787	0.82753	0.961141
YKL078W	250.114	0.511815	0.327941	1.56069	0.118597	0.533257
YIL055C	325.861	-0.161373	0.219104	-0.73651	0.46142	0.819362
YPL053C	1813.37	0.166059	0.0965768	1.71945	0.0855317	0.496088
YLR351C	2199.28	-0.277197	0.162968	-1.70092	0.0889573	0.499555
YEL009C-A	6.09246	-0.867575	0.707401	-1.22643	0.220038	0.638209
YJR111C	508.897	-0.140121	0.332404	-0.421538	0.673362	0.907218
YIL030C	2020.81	0.226232	0.153733	1.47159	0.141132	0.568015
YER125W	2860.83	0.00145256	0.148022	0.00981314	0.99217	0.997621
YER152C	1647.05	-0.216452	0.167262	-1.29409	0.195634	0.624803
YLR015W	383.04	0.0509554	0.106283	0.47943	0.631633	0.885176
YHR116W	148.139	0.604761	0.379643	1.59297	0.111167	0.526703
YPL259C	996.735	0.182966	0.108377	1.68824	0.0913659	0.500173
YOL100W	1277.14	-0.0155638	0.155429	-0.100135	0.920237	0.985934
YOR039W	1277.07	-0.00152764	0.0812691	-0.0187973	0.985003	0.99707
YDL037C	77.2191	-0.290859	0.319317	-0.910878	0.36236	0.762842
YHL043W	2.71464	0.277706	0.840013	0.330597	0.740949	NA
YOR364W	10.5098	1.04288	0.47869	2.17861	0.0293607	0.380627
YOR386W	920.764	-0.351348	0.233727	-1.50324	0.132777	0.553736
YAR042W	1523.57	-0.147252	0.14381	-1.02393	0.305866	0.724589
YPR198W	1220.31	-0.0255877	0.142873	-0.179094	0.857864	0.967378
YHL038C	458.025	-0.0139451	0.163265	-0.0854143	0.931932	0.986591
YLL053C	122.491	-0.915537	0.325026	-2.81681	0.00485028	0.289946
YDR425W	747.151	-0.15746	0.120771	-1.30379	0.192306	0.622593
YOR331C	11.8921	0.0485962	0.765414	0.0634901	0.949376	0.988952
YML076C	891.694	-0.0883367	0.164348	-0.537497	0.590925	0.868825
YKR060W	369.634	0.0861138	0.252982	0.340395	0.733559	0.926425
YHR094C	5.53257	0.239239	0.666495	0.358952	0.719631	0.920641
YER069W	8668.06	-0.662004	1.201	-0.551209	0.58149	0.86464
YMR091C	1303.46	-0.0630377	0.101171	-0.623083	0.53323	0.852148
YER012W	2650.9	0.00892114	0.129349	0.0689694	0.945014	0.988263
YHR098C	2483.5	0.0613293	0.155281	0.394957	0.692874	0.9122
YDL135C	1170.35	0.0346265	0.113858	0.304119	0.761037	0.939974
YCR093W	2349.25	0.0682161	0.213446	0.319594	0.749276	0.93552
YGL080W	582.408	0.177522	0.138137	1.28511	0.198753	0.628325
YBR069C	1726.1	1.00013	0.529671	1.8882	0.0589991	0.454598
YGR077C	835.085	-0.131622	0.136935	-0.961196	0.336454	0.744647
YCR104W	3.59516	0.435412	0.787484	0.552916	0.580321	0.86464
YDR040C	2136.89	0.0825605	0.233302	0.353878	0.72343	0.922225
YPR012W	8.71751	0.093085	0.511885	0.181848	0.855702	0.967165
YGR255C	1572.01	-0.0535132	0.131413	-0.407215	0.68385	0.910356
YDL051W	1716.12	0.335924	0.128451	2.6152	0.00891765	0.30406
YBL102W	1026.89	0.0222264	0.121777	0.182517	0.855177	0.967165
tM(CAU)P	2.74713	-0.619488	0.917212	-0.675403	0.49942	NA
YPL237W	3361.77	0.316706	0.127935	2.47552	0.0133041	0.326863
YLR120C	2342.71	-0.119384	0.187356	-0.637203	0.523993	0.85071
YCL001W-B	9.02369	0.0900623	0.49017	0.183737	0.85422	0.967165
YCL001W-A	10.8271	0.0376626	0.43787	0.0860133	0.931456	0.986591
YNL068C	769.273	-0.126209	0.166545	-0.757805	0.448568	0.811443
YBL002W	7381.43	-0.0583902	0.222846	-0.26202	0.793306	0.950595
YDR146C	1637.57	-0.0469704	0.156266	-0.30058	0.763735	0.940757
YBR112C	2729.89	-0.153083	0.115054	-1.33053	0.183344	0.61195
YBL081W	358.951	0.304822	0.362586	0.840689	0.400522	0.784492
YFL040W	6.59718	-0.375323	0.553979	-0.677505	0.498086	0.840346
YNL326C	468.859	0.0427562	0.12188	0.350806	0.725734	0.922866
YDR337W	808.683	0.317472	0.144157	2.20226	0.0276471	0.373544
YJL061W	945.276	0.24692	0.131247	1.88134	0.0599255	0.456408
YPR147C	829.28	-0.0331047	0.120854	-0.273924	0.784143	0.945797
YKL131W	1.71202	-0.621323	1.28387	-0.483946	0.628424	NA
YDR441C	414.682	0.104059	0.188525	0.551966	0.580972	0.86464
YPL094C	2227.16	0.102884	0.127448	0.807266	0.419513	0.791202
YOR101W	1939.73	0.229796	0.217477	1.05664	0.290675	0.710137
YER020W	2182.46	-0.494158	0.166383	-2.96999	0.00297805	0.230168
YDR231C	613.26	-0.207109	0.18422	-1.12425	0.260908	0.680217
YJL112W	1263.68	-0.00588605	0.0892703	-0.0659352	0.947429	0.988813
YFL066C	509.135	-0.668558	0.198596	-3.36642	0.00076151	0.132568
YNL193W	630.877	-0.0279758	0.174766	-0.160076	0.872821	0.971697
YML058W	2195.85	-0.0516285	0.147548	-0.34991	0.726406	0.923236
YBR188C	267.952	0.00304707	0.136748	0.0222824	0.982223	0.996223
YLR435W	449.874	0.482508	0.183806	2.62509	0.00866259	0.30334
YJR076C	2017.58	0.0507006	0.0901474	0.562419	0.573831	0.863294
YKL157W	5889.77	-0.280536	0.197476	-1.42061	0.15543	0.582656
YBR003W	1190.23	-0.0759124	0.173062	-0.438644	0.66092	0.901558
YPR129W	1697.12	0.108502	0.114685	0.946087	0.344104	0.749866
YDL113C	1272.98	-0.125245	0.138666	-0.903213	0.366413	0.764328
YMR135C	1790.15	-0.207814	0.148227	-1.402	0.160914	0.5878
YGL007W	1.41415	-2.31197	1.32623	-1.74327	0.0812866	NA
YPL005W	350.588	-0.00378062	0.114346	-0.0330629	0.973624	0.994017
YBR247C	715.496	0.35551	0.224385	1.58438	0.113107	0.529927
YLR185W	3417.85	0.368653	0.187015	1.97125	0.0486954	0.426295
YJL210W	941.515	-0.152255	0.221415	-0.687646	0.491676	0.834712
YLR398C	1337.39	0.15849	0.115632	1.37064	0.170487	0.603413
YIL154C	1161.15	-0.340388	0.167103	-2.03699	0.0416511	0.41607
YIL101C	1966.47	-0.630568	0.2288	-2.75598	0.00585162	0.29102
YKL004W	1573.51	0.144551	0.17957	0.804983	0.420829	0.792861
YPL154C	10705.9	-0.350855	0.192245	-1.82504	0.0679945	0.472349
YPL101W	1031.01	0.0337683	0.114726	0.294337	0.7685	0.940982
YLR258W	8933.27	-0.518008	0.384383	-1.34764	0.177776	0.610681
YBR178W	2.84672	-0.223034	0.955952	-0.233311	0.81552	NA
YJR098C	257.71	-0.0710968	0.13914	-0.510975	0.609369	0.875441
YHR176W	1063.64	-2.27776	0.826316	-2.75652	0.00584201	0.29102
YJR018W	5.45647	0.246404	0.591235	0.416762	0.676853	0.90809
YMR326C	2.15913	-0.21065	0.991838	-0.212383	0.831808	NA
YDL244W	46.6894	-0.491401	0.382437	-1.28492	0.19882	0.628325
YDR319C	742.758	-0.0755702	0.181971	-0.415288	0.677931	0.90809
YKL095W	374.99	0.112324	0.140793	0.797799	0.424987	0.794345
YOL099C	6.6793	0.0207582	0.600717	0.0345557	0.972434	0.994017
YIL094C	11306.7	-0.316842	1.04132	-0.30427	0.760922	0.939974
YLR451W	1028.71	0.029415	0.174893	0.168189	0.866435	0.968541
YFR017C	1702.74	-0.558284	0.317525	-1.75824	0.0787067	0.48835
YLR342W-A	21.7234	-0.201393	0.549111	-0.366762	0.713796	0.919096
YIL076W	1995.9	0.0505202	0.102793	0.491477	0.623089	0.881741
YNR077C	2.39191	-1.28596	0.946023	-1.35933	0.174041	NA
YOL044W	565.25	-0.194797	0.222586	-0.875155	0.381489	0.773838
YLR323C	198.636	-0.0378147	0.173075	-0.218487	0.82705	0.961141
YOR085W	1904.7	0.0424382	0.10943	0.38781	0.698157	0.914323
YGR054W	1974.11	0.22094	0.171581	1.28767	0.19786	0.628091
YOR050C	2.99396	-0.758434	0.831371	-0.912268	0.361628	NA
YNL087W	3091.5	-0.0190437	0.192764	-0.0987932	0.921303	0.985968
YLR318W	253.914	0.170243	0.207545	0.82027	0.412062	0.788955
YBR278W	398.732	-0.102252	0.137884	-0.741585	0.458339	0.818615
YNL024C-A	474.386	0.10986	0.144078	0.762508	0.445757	0.81002
YDR296W	953.423	0.333472	0.210836	1.58167	0.113726	0.529927
YGL232W	909.935	0.151509	0.132091	1.14701	0.251378	0.666224
YPR091C	1909.97	-0.0423929	0.167383	-0.253269	0.800061	0.952426
YGR141W	811.281	-0.15373	0.122102	-1.25903	0.20802	0.631188
YAR030C	14.0586	0.358937	0.41596	0.862912	0.388186	0.776244
YGL111W	1109.92	0.264059	0.163466	1.61538	0.106229	0.522399
YHR137W	2667.09	-0.464928	0.321751	-1.44499	0.148461	0.574386
YFL011W	20.6563	0.661	0.569808	1.16004	0.246033	0.661826
YMR198W	500.669	0.04662	0.128929	0.361595	0.717655	0.920636
YCR003W	494.024	0.499722	0.3142	1.59046	0.111732	0.527738
YMR316C-B	106.467	-0.250877	0.231649	-1.08301	0.278805	0.698577
YMR316C-A	8.38135	-0.513366	0.627854	-0.817653	0.413556	0.789162
YDR342C	16855.8	-0.657921	0.25954	-2.53495	0.0112462	0.311703
YMR163C	581.234	0.0103157	0.172357	0.0598508	0.952274	0.989631
YGR294W	14.456	-0.295074	0.452415	-0.652221	0.514259	0.845274
YEL008W	3.69688	0.0573042	0.735777	0.0778826	0.937921	0.987334
YLL067C	90.892	-0.685353	1.37618	-0.49801	0.618477	0.879874
YBR020W	150080	-0.00584071	0.157323	-0.0371255	0.970385	0.994017
YLR418C	955.781	-0.00273561	0.0891507	-0.0306852	0.975521	0.994436
YER059W	1079.51	-0.205748	0.12077	-1.70363	0.0884497	0.498542
YNL076W	950.779	-0.0308695	0.103423	-0.298479	0.765338	0.940914
YBL025W	193.373	-0.15031	0.180457	-0.832938	0.40488	0.787402
YOL066C	600.02	0.12914	0.139133	0.92818	0.353314	0.757742
YDR126W	218.542	0.125612	0.149424	0.840638	0.400551	0.784492
YPL216W	474.853	-0.0817192	0.166511	-0.490773	0.623587	0.881847
YOR223W	393.987	-0.110802	0.125424	-0.883421	0.377009	0.770844
YEL022W	1076.64	0.336497	0.193291	1.74088	0.0817047	0.492901
YHR072W	2016.38	0.035533	0.100301	0.354262	0.723143	0.922225
YOL019W	3999.19	-0.189446	0.350452	-0.540576	0.5888	0.868628
YLR463C	97.2555	0.0235015	0.218695	0.107462	0.914422	0.985934
YJL190C	4961.87	0.62023	0.261367	2.37302	0.0176432	0.34345
YMR218C	686.495	0.211904	0.123583	1.71467	0.0864055	0.496305
YNL265C	1106.09	-0.134498	0.150761	-0.892127	0.372325	0.767189
YNL230C	323.563	-0.0342812	0.12391	-0.276663	0.782039	0.944698
YLL049W	320.946	0.117781	0.130142	0.905021	0.365454	0.763835
YHR211W	679.84	-0.0626675	0.16744	-0.374269	0.708204	0.916719
YPR166C	554.58	0.450454	0.176158	2.55711	0.0105547	0.309967
YJL042W	3038.67	-0.359253	0.193939	-1.8524	0.0639681	0.46455
YNL301C	1151.89	0.470666	0.185546	2.53665	0.0111918	0.311703
YDR333C	1010.75	0.124652	0.124418	1.00188	0.3164	0.730321
YMR058W	16710.7	-0.310144	0.286566	-1.08228	0.279129	0.698577
YDR061W	928.329	-0.0884198	0.0950406	-0.930337	0.352197	0.756557
YJR112W-A	369.056	0.0509589	0.186226	0.27364	0.784361	0.945797
YOR290C	2410.06	-0.0351346	0.157182	-0.223528	0.823124	0.960116
YKL114C	1001.35	0.0637595	0.0911366	0.699603	0.484175	0.829975
YML024W	7700.8	0.4408	0.216966	2.03166	0.0421886	0.416436
YML093W	1417.22	0.314083	0.246839	1.27242	0.203223	0.6285
YHR197W	668.988	0.539105	0.274573	1.96343	0.0495964	0.427893
YDR276C	2672.59	-0.277065	0.177663	-1.5595	0.118877	0.533257
YLR200W	470.493	0.241923	0.123126	1.96484	0.0494325	0.427893
YKR003W	754.631	0.0756183	0.116626	0.648385	0.516736	0.846744
YLR107W	738.326	-0.137852	0.116897	-1.17926	0.238295	0.656315
YMR321C	4.52463	-1.6721	1.40365	-1.19125	0.233556	0.651882
YER175C	2125.12	-0.680642	0.504042	-1.35037	0.176898	0.610318
YIR012W	1224.09	0.307367	0.198404	1.54919	0.121336	0.535335
YDL183C	337.113	0.0980207	0.340104	0.288208	0.773187	0.941354
YPL278C	151.327	-0.264439	0.14364	-1.84099	0.0656237	0.469958
YMR118C	17.4964	-1.64743	0.473822	-3.4769	0.000507255	0.0986689
YCL049C	888.401	-0.068673	0.175681	-0.390895	0.695875	0.912855
YBL066C	946.252	-0.0543049	0.140068	-0.387704	0.698235	0.914323
YGL120C	2194.36	0.39136	0.189725	2.06277	0.0391341	0.40633
YGR271C-A	391.219	0.584747	0.299725	1.95094	0.0510636	0.433934
YDR169C	1362.61	-0.108646	0.106031	-1.02467	0.30552	0.724589
YOR057W	785.881	-0.0722501	0.11254	-0.641996	0.520876	0.848908
YLR410W-A	61.8713	2.32301	3.23061	0.719062	0.472103	0.82349
YLR169W	1.30608	1.24699	1.31666	0.947091	0.343592	NA
YMR272C	3978.47	-0.0292747	0.107925	-0.271251	0.786198	0.94614
YPR108W	2329.29	0.0962507	0.0971771	0.990467	0.321946	0.734283
YKL054C	3624.79	0.0132491	0.139351	0.0950774	0.924253	0.986591
YGR162W	3589.41	0.312916	0.217282	1.44014	0.149829	0.578227
YDL165W	680.687	-0.0776112	0.135914	-0.57103	0.567979	0.861942
YDR520C	470.588	0.184956	0.167737	1.10266	0.270177	0.692516
YKL023W	644.313	-0.283665	0.151233	-1.87569	0.0606978	0.456887
YJR051W	1436.01	-0.136697	0.108393	-1.26112	0.207264	0.630484
YNL009W	252.844	-0.205718	0.166402	-1.23628	0.216356	0.635538
YFL034W	948.796	-0.0836371	0.0940508	-0.889276	0.373855	0.767485
YKL164C	9402.03	-0.276969	0.301683	-0.91808	0.358577	0.760088
YJR135C	164.033	0.210227	0.144906	1.45078	0.14684	0.57356
YGL213C	1021.31	-0.0380717	0.112009	-0.339898	0.733933	0.926425
YMR076C	1008.81	0.0871635	0.29468	0.29579	0.76739	0.940914
YOR161W-B	13.5909	0.00987722	0.462974	0.0213343	0.982979	0.996223
YNL027W	1139.07	0.0520405	0.122019	0.426496	0.669746	0.905836
YLR291C	833.092	0.182703	0.114472	1.59605	0.110477	0.526116
YDR210W	309.556	0.141567	0.150527	0.940471	0.346976	0.752693
YIL122W	369.478	0.0306751	0.154908	0.198021	0.843029	0.965686
YDL230W	407.636	-0.101786	0.147823	-0.68857	0.491094	0.833956
YJR113C	980.937	0.120857	0.189384	0.63816	0.52337	0.85071
YGL075C	219.272	0.0372878	0.192818	0.193383	0.846659	0.96659
YHR041C	536.68	0.0235906	0.144897	0.162809	0.870668	0.970073
YIL156W-B	499.595	0.00457897	0.209586	0.0218477	0.982569	0.996223
YIL156W-A	3.54549	-0.766363	0.799377	-0.9587	0.33771	NA
YLR416C	4.72553	-0.358552	0.69423	-0.516475	0.605523	0.874835
YGR097W	1548.62	-0.0368824	0.160426	-0.229902	0.818168	0.958927
YIL068C	999.569	0.0333212	0.142451	0.233914	0.815052	0.957598
YCL025C	32278.7	-0.172641	0.337177	-0.51202	0.608637	0.874835
YNR034W	451.36	0.138943	0.215464	0.644853	0.519022	0.848722
YOL085C	1.38773	0.297073	1.18185	0.251362	0.801534	NA
YNL282W	173.057	0.164972	0.205483	0.80285	0.422061	0.794111
YBR286W	14248.3	-0.355639	0.172183	-2.06547	0.0388781	0.40633
YGL144C	367.703	-0.0194845	0.185003	-0.10532	0.916122	0.985934
YDR190C	2380.79	0.147422	0.110226	1.33745	0.181077	0.61195
YAL031C	869.629	-0.091731	0.108148	-0.848197	0.396329	0.783844
YBL006C	896.392	0.169027	0.175003	0.96585	0.334119	0.743936
YNL132W	1537.07	0.404782	0.244641	1.6546	0.0980059	0.514917
YBR264C	372.76	-0.188512	0.139631	-1.35006	0.176995	0.610318
YBR231C	389.66	-0.0439615	0.153231	-0.286897	0.774191	0.941576
YLR162W-A	7.89501	0.0264499	0.548283	0.0482413	0.961524	0.992304
YPL197C	2.48255	1.20609	0.922048	1.30806	0.190853	NA
YHR076W	1164.14	0.00465506	0.120386	0.0386677	0.969155	0.994017
YDR462W	437.165	0.424589	0.221858	1.91379	0.0556472	0.446429
YJL148W	903.468	0.433219	0.243108	1.782	0.0747488	0.482063
YIL057C	73.4474	1.66909	1.02218	1.63287	0.102496	0.521725
YPL055C	500.486	-0.0302529	0.147473	-0.205142	0.837461	0.964567
YLR353W	1015	0.0626977	0.104216	0.601616	0.54743	0.855811
YIL020C	217.264	0.268493	0.185796	1.4451	0.14843	0.574386
YIL148W	8251.39	0.343103	0.181828	1.88696	0.0591656	0.454598
YNR016C	12598.9	0.283832	0.164388	1.7266	0.0842402	0.494962
tY(GUA)J1	1.44368	0.863649	1.24829	0.691867	0.489021	NA
YFR036W	123.765	-0.143294	0.190024	-0.754083	0.4508	0.812799
YHR114W	1063.33	0.0154551	0.141744	0.109035	0.913175	0.985934
YGR028W	1140.95	0.108213	0.165085	0.655499	0.512146	0.843366
YER150W	2098.06	-0.873578	0.773586	-1.12926	0.258789	0.679533
YNL279W	88.8615	0.836477	0.330132	2.53377	0.0112843	0.311703
YDR400W	528.499	0.306313	0.122842	2.49354	0.0126476	0.323685
YDL068W	3.03778	-1.12862	0.952067	-1.18545	0.235841	NA
YOL027C	1916.61	0.196235	0.110932	1.76896	0.0769002	0.488191
YPL257W	158.913	-0.189863	0.16843	-1.12725	0.259637	0.679853
YPL120W	401.666	-0.00500445	0.202301	-0.0247376	0.980264	0.995797
YOL145C	2346.95	0.15341	0.145481	1.05451	0.291651	0.710812
YJL099W	565.803	0.0564243	0.0992158	0.568703	0.569558	0.862148
YHR149C	889.975	0.115618	0.269309	0.429314	0.667695	0.905669
YDR395W	1919.43	0.182329	0.231986	0.78595	0.431897	0.799864
YOL110W	540.662	-0.478083	0.149324	-3.20165	0.00136642	0.154178
YDR005C	1653.27	-0.0109429	0.133024	-0.0822626	0.934438	0.987126
YMR311C	2112.22	-0.167065	0.145823	-1.14567	0.25193	0.667282
YHL041W	1.52019	-0.544851	1.25126	-0.435442	0.663241	NA
YBL039C	1499.4	0.504656	0.204636	2.46611	0.0136589	0.331568
YGR188C	348.204	-0.117911	0.24354	-0.484156	0.628275	0.883471
YOR362C	2922.93	-0.0917231	0.13866	-0.661497	0.508293	0.843366
YPR106W	844.675	-0.305578	0.222821	-1.3714	0.170249	0.603413
YLR126C	832.636	-0.195954	0.217724	-0.900014	0.368113	0.765415
YDL053C	852.48	0.0955485	0.11653	0.819947	0.412246	0.788955
YML074C	3368.49	0.162406	0.107955	1.50438	0.132482	0.553266
YKR062W	756.81	-0.102001	0.111023	-0.918735	0.358234	0.760088
YBR235W	2045.86	-0.347222	0.221163	-1.56998	0.116419	0.530944
YER010C	855.813	-0.169342	0.133825	-1.2654	0.205727	0.6285
YML003W	137.837	-0.0242476	0.263039	-0.0921824	0.926553	0.986591
YMR097C	657.69	0.0878837	0.154477	0.568911	0.569416	0.862148
YDL133W	746.23	-0.0462036	0.0919441	-0.502518	0.615303	0.878637
YNL330C	1572.15	0.0311239	0.0874224	0.356018	0.721827	0.922225
YGR228W	12.1664	0.886627	0.586903	1.51069	0.130868	0.547962
YHR096C	243.621	-0.456603	0.235411	-1.9396	0.0524282	0.434096
YBR008C	693.584	-0.189252	0.170812	-1.10796	0.267881	0.690439
YDL035C	1525.07	-0.149277	0.161792	-0.922646	0.356191	0.759137
YMR253C	673.965	-0.269613	0.150548	-1.79088	0.0733133	0.481909
YCR102C	160.206	-0.0692095	0.194334	-0.356137	0.721738	0.922225
YJL127C-B	406.118	0.106132	0.190835	0.556146	0.578111	0.864324
YOR257W	721.448	0.0705907	0.105836	0.666983	0.504783	0.842118
YGR002C	605.238	0.0505959	0.0988926	0.511625	0.608913	0.875026
YEL041W	503.621	-0.314736	0.21879	-1.43853	0.150284	0.578227
YGR075C	216.296	-0.0113045	0.240242	-0.0470548	0.96247	0.992423
YGR253C	3054.58	0.00122819	0.113077	0.0108615	0.991334	0.997621
YDR510W	2062.36	-0.072247	0.133294	-0.542011	0.587811	0.868581
YPL050C	2042.91	0.213692	0.146853	1.45514	0.145631	0.573453
YMR166C	300.173	0.149344	0.155361	0.961275	0.336414	0.744647
YPR045C	769.372	0.0193315	0.18923	0.102159	0.918631	0.985934
YPL231W	20586.5	0.145647	0.169657	0.85848	0.390628	0.777836
YLR148W	961.018	0.127343	0.212974	0.597926	0.54989	0.855811
YMR137C	440.214	0.182691	0.17265	1.05816	0.289984	0.709018
YDL082W	4735.71	0.368856	0.178411	2.06744	0.0386923	0.40633
YKL155C	629.418	0.622968	0.206997	3.00955	0.00261633	0.230168
YBR162W-A	904.917	0.12058	0.226149	0.533188	0.593904	0.871291
YFL042C	1302.71	-0.371101	0.167903	-2.21022	0.02709	0.372376
YBL083C	217.726	0.105726	0.191169	0.55305	0.580229	0.86464
YDR148C	5311.05	-0.365441	0.129912	-2.81299	0.00490831	0.289946
YHR052W-A	427.004	-0.345148	0.784697	-0.439849	0.660046	0.901558
YPL096W	725.095	-0.0821727	0.118432	-0.693842	0.487782	0.831977
YDR335W	2181.03	-0.111152	0.158507	-0.701247	0.483149	0.829761
YPR141C	458.171	0.0704957	0.187812	0.375354	0.707398	0.916719
YMR039C	1403.21	0.0145235	0.129501	0.11215	0.910704	0.985424
YIL058W	1.78862	-0.778961	1.15564	-0.674049	0.50028	NA
YNL320W	523.363	0.0429403	0.118713	0.361715	0.717565	0.920636
YPL078C	5286.8	-0.146068	0.152867	-0.955519	0.339315	0.746805
YCR095C	426.301	0.191228	0.15115	1.26515	0.205816	0.6285
YLL011W	528.824	0.374132	0.319196	1.17211	0.241155	0.658078
YCR077C	2884.86	-0.0393533	0.0923699	-0.426041	0.670078	0.905836
YLR437C	251.711	0.0854332	0.200964	0.425117	0.670751	0.905983
YFL064C	90.82	0.15862	0.924701	0.171536	0.863802	0.968541
YNL191W	478.751	-1.46377	0.731945	-1.99983	0.0455182	0.425372
YDR237W	799.426	0.42555	0.222126	1.9158	0.0553904	0.445834
YJL110C	886.741	0.182004	0.277684	0.655436	0.512187	0.843366
YKR048C	3316.53	0.0549952	0.119238	0.46122	0.64464	0.892909
YBR001C	1333.69	-0.0309835	0.216403	-0.143175	0.886152	0.977744
YPL003W	471.413	-0.117413	0.171567	-0.684356	0.49375	0.83637
YKL108W	380.954	-0.0119228	0.232743	-0.0512274	0.959144	0.992092
YGR110W	439.368	-0.393072	0.14637	-2.68547	0.00724274	0.29102
YJR074W	839.867	0.185083	0.207433	0.892254	0.372257	0.767189
YPR127W	1083.81	-0.325343	0.155991	-2.08565	0.0370101	0.403898
YIR028W	503.933	-0.488199	0.837533	-0.582901	0.55996	0.858108
YAL012W	10118.8	-1.75799	0.777008	-2.26252	0.0236655	0.360556
YMR288W	631.682	0.0893748	0.113891	0.784737	0.432608	0.800693
YIL156W	822.51	-0.0716176	0.13751	-0.520819	0.602493	0.873629
YBR241C	1332.03	-0.695812	0.232783	-2.9891	0.00279797	0.230168
YHR063W-A	1.91306	1.45322	1.08489	1.33951	0.180405	NA
YJL212C	2378.98	-1.93542	1.43831	-1.34563	0.178423	0.610681
YPL156C	275.309	0.468211	0.249998	1.87286	0.061088	0.456951
YNL312W	1405.66	-0.162861	0.192358	-0.846656	0.397187	0.783844
YLR187W	468.703	0.0171226	0.145708	0.117513	0.906453	0.984467
YDR099W	7475.39	-0.266811	0.15538	-1.71716	0.0859506	0.496088
YKL133C	504.414	-0.154788	0.19925	-0.776849	0.437248	0.804879
YHR170W	2334.97	0.239574	0.204774	1.16995	0.242023	0.658618
YDR259C	140.324	-0.306255	0.162863	-1.88044	0.0600477	0.456768
YKL068W	1396.99	0.0786367	0.147828	0.531946	0.594763	0.871446
YOR032C	325.524	0.0193717	0.263978	0.0733836	0.941501	0.988017
YKL093W	943.555	0.00628646	0.269509	0.0233256	0.981391	0.996206
YMR002W	2776.73	0.168124	0.131605	1.27749	0.20143	0.6285
YLR145W	267.073	0.144813	0.117579	1.23162	0.218091	0.636458
YLR261C	307.664	0.0706741	0.169766	0.416303	0.677188	0.90809
YDL246C	153.36	-0.563115	0.28527	-1.97397	0.0483846	0.426295
YER081W	1981.91	0.0874875	0.469994	0.186146	0.85233	0.967165
YPL178W	1122.21	0.0382646	0.0876387	0.436617	0.662389	0.902087
YMR172C-A	1.35073	0.757749	1.16326	0.651401	0.514788	NA
YPR202W	385.297	-0.147116	0.363762	-0.404429	0.685897	0.911436
YIL096C	312.186	0.320809	0.204519	1.5686	0.116741	0.531219
YFR011C	972.457	0.0646099	0.108441	0.595805	0.551305	0.855811
YIL074C	5607.47	-1.9939	0.902752	-2.20869	0.0271963	0.372376
YGL173C	4631.66	0.0125191	0.154708	0.0809205	0.935505	0.987126
YHL008C	757.88	-0.155303	0.121922	-1.27379	0.202737	0.6285
YLR457C	322.807	-0.0453005	0.128225	-0.35329	0.723871	0.922225
YNL249C	345.789	0.076086	0.12372	0.614986	0.538564	0.853439
YGR056W	812.632	0.0650732	0.113106	0.57533	0.565068	0.860989
YGL065C	1001.64	-0.0548676	0.179756	-0.305234	0.760188	0.9399
YOR052C	1960.25	-0.246796	0.226018	-1.09193	0.274864	0.696434
YGR116W	3207.21	0.126105	0.131383	0.959829	0.337141	0.745086
YOR343C	29.8082	-0.258637	0.347844	-0.743543	0.457153	0.817323
YGL230C	10.1222	-0.235026	0.602457	-0.390113	0.696453	0.913345
YOL159C	255.977	-0.160309	0.192073	-0.834625	0.403929	0.786619
YBR185C	489.098	0.518237	0.240893	2.15132	0.0314511	0.387444
YOR010C	251.671	-0.149075	0.149754	-0.995465	0.31951	0.73328
YDR019C	2061.5	-0.569563	0.565472	-1.00723	0.313822	0.728124
YBR150C	806.676	-0.0209054	0.207364	-0.100815	0.919697	0.985934
YIR042C	333.297	-2.20245	0.704266	-3.1273	0.00176418	0.182189
YER119C	1298.47	-0.507855	0.19057	-2.66492	0.00770061	0.296961
YMR196W	3791.07	-0.666443	0.367066	-1.81559	0.0694329	0.475013
YMR161W	542.108	0.0223665	0.123874	0.180558	0.856714	0.967165
YDR499W	700.118	0.0947852	0.127356	0.744256	0.456722	0.81703
YKL068W-A	952.783	-2.80367	1.17249	-2.39121	0.0167929	0.342884
YJL133C-A	1935.83	-0.975751	0.46454	-2.10047	0.0356878	0.40138
YDL215C	20611.6	-0.342348	0.858046	-0.398986	0.689903	0.911761
YJR120W	76.5834	-0.271632	0.230672	-1.17757	0.238969	0.656315
YLL061W	1521.79	-2.13862	1.05818	-2.02104	0.0432756	0.419202
YDR110W	593.651	0.163838	0.214069	0.76535	0.444063	0.808803
YDR419W	619.397	-0.139095	0.10398	-1.33772	0.180989	0.61195
YOR221C	854.193	-0.057517	0.141638	-0.406086	0.684679	0.910664
YPL214C	991.737	-0.197922	0.126891	-1.55978	0.118812	0.533257
YBL108C-A	19.4755	-0.35761	0.393737	-0.908245	0.363749	0.763451
YGL165C	5.93686	0.247164	0.558168	0.442813	0.657901	0.900605
YOL064C	2206.44	-1.3249	0.590546	-2.24352	0.0248632	0.366305
YBL023C	795.276	0.127032	0.141243	0.899381	0.36845	0.765415
YOR274W	529.059	0.158798	0.110395	1.43845	0.150306	0.578227
YOR329C	1641.01	-0.227209	0.118966	-1.90988	0.0561493	0.448022
YLR005W	1175.68	-0.192182	0.13169	-1.45935	0.144467	0.573278
YDR124W	108.735	0.437421	0.278128	1.57274	0.11578	0.530653
YNL267W	1500.55	0.123805	0.129785	0.953927	0.340121	0.746963
YLR461W	5.57081	-0.372983	0.794266	-0.469594	0.638645	0.889197
YLR050C	497.21	-0.207316	0.16454	-1.25997	0.20768	0.631118
YOR124C	1599.31	-0.128021	0.190228	-0.672988	0.500955	0.841361
YDR067C	458.759	0.0281744	0.165466	0.170273	0.864796	0.968541
YMR056C	386.997	-0.235256	0.165952	-1.41762	0.156303	0.582835
YHR032W-A	78.6849	-0.0308255	0.238919	-0.129021	0.897341	0.98195
YJL044C	1202.29	-0.00285326	0.119808	-0.0238152	0.981	0.996206
YPR164W	820.693	0.163239	0.186238	0.876507	0.380754	0.773838
YEL060C	17984.5	-0.647814	0.306783	-2.11164	0.0347176	0.39837
YHR195W	1030.91	-0.229139	0.154132	-1.48664	0.137111	0.557558
YLR101C	29.5997	0.189711	0.315613	0.601087	0.547782	0.855811
YBL107W-A	17.5436	0.571901	0.615517	0.929139	0.352817	0.756942
YML026C	7528.74	0.478676	0.229622	2.08462	0.0371034	0.403898
YPR066W	233.849	-0.217075	0.164402	-1.32039	0.186704	0.614587
YDR073W	552.064	0.164263	0.101796	1.61365	0.106602	0.522433
YDR229W	1065.05	-0.172896	0.0894368	-1.93317	0.0532155	0.436984
YDL181W	1458.35	-0.207156	0.209549	-0.988581	0.322868	0.734866
YBR022W	382.027	0.286461	0.131929	2.17132	0.0299069	0.382019
YER177W	14466.5	-0.205733	0.169386	-1.21458	0.224527	0.642306
YML048W	3946.33	0.117055	0.183647	0.637387	0.523872	0.85071
YBL064C	3344.53	-0.151515	0.215535	-0.702972	0.482073	0.829036
YIL045W	1468.67	-0.551032	0.541488	-1.01763	0.308856	0.725981
YKL221W	19.472	-0.624116	0.348091	-1.79297	0.0729785	0.481909
YGL126W	1068.17	0.176888	0.246818	0.716676	0.473574	0.823954
YLR167W	23646.5	0.443804	0.23446	1.89287	0.0583748	0.45425
YMR270C	814.115	-0.00435322	0.0896572	-0.0485541	0.961275	0.992304
YLR293C	7196.19	0.069437	0.107135	0.648125	0.516904	0.846744
YLR228C	837.143	0.0958454	0.138129	0.693883	0.487756	0.831977
YJR053W	211.101	-0.0335968	0.14494	-0.231798	0.816695	0.957957
YJL171C	2286.55	-0.184602	0.158549	-1.16432	0.244294	0.659553
YDR374C	9.92671	-0.421232	0.557671	-0.755342	0.450044	0.812676
YKL021C	1035.62	0.279105	0.142584	1.95748	0.0502916	0.43098
YDL167C	772.105	0.431975	0.234987	1.83829	0.0660191	0.469958
YLR388W	2426.06	0.555241	0.186108	2.98344	0.00285027	0.230168
YLR373C	1128.98	0.0303356	0.172559	0.175798	0.860452	0.967912
YKR001C	3924.65	-0.00830079	0.0972605	-0.0853459	0.931986	0.986591
YKR054C	1229.78	-0.126368	0.229059	-0.551683	0.581165	0.86464
YIR034C	7946.17	0.0257972	1.30244	0.0198068	0.984197	0.9968
YGL013C	984.252	0.17212	0.158064	1.08892	0.276189	0.696434
YJR068W	997.459	0.0749061	0.0851471	0.879726	0.379008	0.773115
YGR207C	1634.77	-0.00203476	0.13684	-0.0148696	0.988136	0.997463
YDR212W	2750.88	0.193445	0.10347	1.86958	0.0615426	0.456951
YNL052W	2906.52	-0.238339	0.152886	-1.55893	0.119012	0.533257
YGL188C	325.573	-0.249971	0.115389	-2.16633	0.0302861	0.383645
YNL025C	450.004	-0.282713	0.16728	-1.69006	0.0910171	0.500173
YGR121W-A	2.76722	0.0386865	0.938272	0.0412317	0.967111	NA
YGR091W	363.736	-0.0320703	0.104343	-0.307354	0.758574	0.939583
YDL232W	144.634	0.146774	0.235342	0.623665	0.532847	0.852148
YPL119C	408.157	-0.255554	0.158073	-1.61668	0.105947	0.522399
YLR242C	258.863	0.251124	0.246185	1.02006	0.307699	0.725924
YJR148W	6483.93	-0.501344	0.704393	-0.711739	0.476626	0.825608
YJR082C	466.495	0.0279207	0.103415	0.269988	0.78717	0.946561
YOL087C	2320.99	-0.162758	0.132998	-1.22376	0.221042	0.638209
YNL134C	10090.4	-0.300624	0.182699	-1.64546	0.0998746	0.518786
YAL037W	236.204	-0.184297	0.281358	-0.655028	0.512449	0.843366
YGL146C	271.815	0.0162136	0.250768	0.0646556	0.948448	0.988952
YBR262C	708.098	0.119914	0.159995	0.749486	0.453564	0.814945
YPL199C	973.694	0.0314273	0.0896126	0.350702	0.725812	0.922866
YML101C-A	17.6081	-0.127231	0.401414	-0.316958	0.751275	0.936585
YFL036W	1456.41	0.329685	0.168585	1.95561	0.0505113	0.431194
YDL209C	282.066	-0.0134148	0.269883	-0.049706	0.960357	0.992279
YIL051C	3004.47	-0.472572	0.235203	-2.00921	0.044515	0.422477
YPL057C	2466.03	-0.104546	0.175261	-0.596516	0.550831	0.855811
YNR010W	189.788	0.0163563	0.150147	0.108935	0.913254	0.985934
YDR365C	4438.54	0.237595	0.212688	1.11711	0.263948	0.685231
YNL169C	2028.2	0.500325	0.199825	2.50381	0.0122864	0.322753
YFR034C	727.731	-0.201449	0.255868	-0.787316	0.431097	0.799353
YHR070W	652.117	0.0211826	0.174185	0.121609	0.903208	0.983451
YDR460W	472.677	-0.110066	0.101712	-1.08213	0.279193	0.698577
YNL112W	6515.38	0.164262	0.389882	0.421311	0.673528	0.907218
YHL047C	753.648	-0.458457	0.258581	-1.77297	0.076233	0.488191
YOR360C	930.178	0.29962	0.180457	1.66034	0.0968471	0.513391
YOR335C	6986.21	-0.086513	0.205392	-0.421208	0.673603	0.907218
YGL251C	397.868	-0.0780765	0.198182	-0.393964	0.693607	0.912381
YER156C	2243.96	0.25037	0.178167	1.40526	0.159945	0.586959
YPL255W	505.979	0.0571764	0.230277	0.248294	0.803907	0.953329
YOR095C	689.038	0.738158	0.212738	3.4698	0.000520843	0.0986689
YEL038W	613.574	-0.197471	0.149898	-1.31737	0.187715	0.616908
YCL014W	818.688	-0.0470354	0.16599	-0.283362	0.776899	0.942873
YOL025W	604.555	-0.0961664	0.167696	-0.573458	0.566335	0.861061
YPL208W	870.343	-0.0944163	0.139456	-0.677032	0.498386	0.840346
YOL147C	1132.36	-0.0218649	0.65651	-0.0333047	0.973432	0.994017
YNL280C	1467.24	-0.0680858	0.121491	-0.56042	0.575193	0.864012
YDR007W	962.035	0.118956	0.126702	0.938867	0.347799	0.752693
YIL160C	111.679	-1.18177	0.180699	-6.54002	6.15087e-11	1.87386e-07
YPR089W	1392.54	0.0769723	0.13598	0.566057	0.571355	0.862737
YBR233W	635.811	-0.000480633	0.120366	-0.0039931	0.996814	0.998617
YPL122C	488.777	0.150546	0.12031	1.25132	0.210819	0.632849
YKL104C	3596.32	0.135282	0.142104	0.951991	0.341102	0.74709
YMR313C	1071.89	-0.176675	0.0961542	-1.83742	0.0661485	0.469958
YGL179C	340.716	0.168525	0.194045	0.868486	0.385129	0.774553
YGR120C	311.398	0.15854	0.166819	0.950375	0.341922	0.74709
YML001W	2037.9	-0.0924072	0.130221	-0.709616	0.477942	0.825894
YLL028W	633.683	0.0127967	0.448114	0.0285567	0.977218	0.994827
YER016W	1019.34	-0.131223	0.0753007	-1.74266	0.0813934	0.492901
YHR061C	480.98	-0.243574	0.207636	-1.17308	0.240763	0.658078
YDR438W	373.787	-0.147998	0.135516	-1.09211	0.274786	0.696434
YNL211C	94.3581	0.430735	0.230484	1.86883	0.0616467	0.456951
YLR124W	1.92553	-0.721954	1.18186	-0.610864	0.54129	NA
YML058W-A	33.5701	-0.448645	0.31246	-1.43585	0.151045	0.57991
YLR026C	762.527	0.0974878	0.139732	0.697674	0.485381	0.830256
YJR065C	4338.75	-0.0883381	0.13917	-0.634748	0.525593	0.851041
YDL131W	7986.22	-0.276964	0.806456	-0.343434	0.731272	0.925751
YMR095C	28.4465	-0.785232	0.479256	-1.63844	0.10133	0.519268
YER138C	34384.4	-0.0119997	0.389248	-0.030828	0.975407	0.994436
YDL033C	282.446	0.14596	0.200695	0.727273	0.467059	0.821982
YMR255W	1119.35	-0.189242	0.176558	-1.07184	0.283792	0.701199
YHR209W	452.237	-0.351247	0.245827	-1.42884	0.15305	0.581599
YGL247W	197.224	0.0375003	0.22303	0.16814	0.866473	0.968541
YCR100C	165.406	-0.318374	0.222332	-1.43198	0.152151	0.580359
YDR516C	4626.51	-0.122371	0.402452	-0.304062	0.76108	0.939974
Q0130	4.9746	1.00564	0.903092	1.11355	0.265471	0.687135
YPL233W	491.518	-0.290581	0.118173	-2.45895	0.0139344	0.333447
YOR255W	1.79889	-0.992115	1.06668	-0.930093	0.352323	NA
YOR063W	35932.7	0.252074	0.186368	1.35256	0.176195	0.61013
YGR251W	303.866	-0.115346	0.186374	-0.618896	0.535985	0.852987
YPR047W	445.643	0.201977	0.235927	0.856098	0.391943	0.779839
YDR246W-A	13.2377	0.13114	0.441553	0.296998	0.766468	0.940914
YDR044W	835.172	-0.112078	0.128909	-0.869434	0.38461	0.774325
YEL016C	860.7	-0.145145	0.0787121	-1.844	0.0651836	0.469958
YAL027W	331.742	-0.040961	0.110395	-0.371041	0.710607	0.917704
YKL153W	20.8549	-0.138433	0.478502	-0.289304	0.772349	0.941197
YFL019C	16.6912	-0.211868	0.512419	-0.413467	0.679265	0.90822
YMR139W	1166.19	-0.0966843	0.15527	-0.622685	0.533491	0.852148
YDL080C	863.5	-0.114551	0.0973424	-1.17678	0.239283	0.656435
YOR172W	612.504	0.140613	0.15537	0.90502	0.365455	0.763835
YOR105W	198.68	-0.00884809	0.159773	-0.0553793	0.955836	0.990904
YJL138C	11074.6	0.120071	0.184712	0.650044	0.515664	0.846428
YPR143W	723.897	0.268671	0.226887	1.18416	0.236349	0.654289
YDR340W	273.213	0.0751505	0.57851	0.129903	0.896643	0.981715
YNL322C	2738.64	-0.133394	0.129333	-1.0314	0.302354	0.721982
YPL090C	10554.1	0.44425	0.196359	2.26244	0.0236702	0.360556
YPR078C	2.19471	0.732557	1.14065	0.642225	0.520727	NA
YCR075C	681.566	-0.322649	0.148525	-2.17236	0.0298284	0.382019
YFL062W	10.9436	-0.4704	0.820813	-0.57309	0.566584	0.861111
YDR171W	11005	-0.192517	0.916743	-0.210001	0.833667	0.96347
YLR439W	746.856	0.157494	0.226746	0.694583	0.487317	0.831907
YCR020C	190.381	-0.224925	0.218204	-1.0308	0.302633	0.721982
YDR450W	7603.58	0.463198	0.221493	2.09125	0.0365056	0.40295
YCL051W	1246.94	-0.208362	0.116556	-1.78766	0.0738317	0.482063
YCR097W	964.681	0.207709	0.285626	0.727206	0.4671	0.821982
YDR235W	700.67	0.201889	0.242322	0.833144	0.404763	0.787402
YGL194C-A	138.555	0.00404914	0.250705	0.016151	0.987114	0.997463
YER038C	229.864	-0.0943776	0.148008	-0.637652	0.5237	0.85071
YPR125W	700.221	0.283632	0.18547	1.52926	0.126201	0.539989
YHR049W	2624.47	0.110868	0.160218	0.69198	0.48895	0.83282
YBR007C	985.751	-0.213064	0.265652	-0.802044	0.422528	0.794111
YPL001W	374.331	0.189786	0.174822	1.08559	0.277659	0.697503
YJL038C	7.42401	-0.421877	0.554913	-0.760257	0.447101	0.810564
YNL319W	8.13695	0.0279807	0.636825	0.0439378	0.964954	0.993321
YPR178W	553.45	-0.159798	0.137188	-1.16481	0.244095	0.659553
YDR475C	1413.97	-0.44316	0.211151	-2.09878	0.0358363	0.40138
TLC1	1345.89	0.698226	0.301255	2.31773	0.0204642	0.352479
YNL159C	557.814	-0.183782	0.119826	-1.53374	0.125093	0.539989
YAL014C	686.653	-0.0951334	0.0996758	-0.954428	0.339867	0.746963
YCR020W-B	175.868	0.330791	0.313299	1.05583	0.291046	0.710474
YBR243C	1112.12	0.123487	0.125621	0.983008	0.325603	0.735034
YLR181C	658.908	-0.11173	0.0904742	-1.23494	0.216853	0.635538
YBL056W	3297.67	0.0455645	0.121997	0.37349	0.708784	0.916719
YNL075W	719.478	0.293617	0.249639	1.17617	0.239527	0.656518
YPL150W	1301.57	-0.206468	0.162031	-1.27425	0.202574	0.6285
YJL012C	2674.06	-0.192879	0.176231	-1.09447	0.27375	0.696434
YJL065C	482.049	-0.0268972	0.105035	-0.256078	0.797891	0.952426
YKR020W	399.747	-0.0618904	0.111067	-0.557233	0.577368	0.864324
YMR053C	303.763	-0.219966	0.231092	-0.951852	0.341172	0.74709
YKL066W	518.881	0.00637898	0.174195	0.0366197	0.970788	0.994017
YMR004W	1194.75	-0.000533543	0.120864	-0.0044144	0.996478	0.998608
YER083C	1470.24	-0.176215	0.128613	-1.37012	0.17065	0.603413
YPL176C	1224.84	0.117036	0.129717	0.902239	0.36693	0.764583
YHR172W	426.23	-0.076834	0.185037	-0.415237	0.677969	0.90809
YLR263W	308.099	-0.0105795	0.167964	-0.0629865	0.949777	0.988952
YDL240W	1461.62	0.00685458	0.146003	0.0469481	0.962555	0.992423
YDR401W	8.19186	0.376683	0.521138	0.722809	0.469797	0.822302
YHR013C	930.896	0.00920124	0.0874884	0.105171	0.91624	0.985934
YOL040C	11280.5	0.307727	0.194376	1.58315	0.113387	0.529927
YGR072W	673.502	0.0466791	0.162062	0.288032	0.773322	0.941354
YCL035C	3013.77	-0.489379	0.208312	-2.34926	0.0188108	0.347498
YIL023C	716.499	0.166287	0.183922	0.904116	0.365934	0.764328
YNR073C	59.3501	-0.234265	0.4659	-0.502822	0.615089	0.878637
YPR200C	69.6536	-0.137656	0.214955	-0.640395	0.521916	0.84956
YIL072W	61.3611	-0.291137	0.29573	-0.98447	0.324885	0.735034
YLR327C	5579.93	-0.31711	0.242255	-1.30899	0.190537	0.622084
YBR229C	1324.17	0.112071	0.140115	0.799851	0.423797	0.794307
YML133C	480.02	-0.136996	0.31157	-0.439694	0.660159	0.901558
YOR131C	590.383	0.0691755	0.131629	0.525534	0.599212	0.872052
YLR455W	775.711	-0.00232675	0.127597	-0.0182352	0.985451	0.99707
YNL247W	3764.23	0.166954	0.106283	1.57085	0.116218	0.530653
YOR054C	1039.91	-0.514009	0.192484	-2.6704	0.00757608	0.294092
YGL007C-A	7.03575	-1.4354	0.587217	-2.44442	0.0145086	0.333814
YFR028C	938.511	0.122708	0.164399	0.746402	0.455425	0.816249
YOR009W	184.344	-0.170676	0.173769	-0.982197	0.326003	0.735034
YOR072W	13.7189	0.267466	0.476367	0.561472	0.574476	0.863627
YDR292C	1865.12	0.0638538	0.0863456	0.739514	0.459595	0.819362
YOR161C-C	4.44675	-0.245816	0.657817	-0.373685	0.708639	0.916719
YHR126C	2.86123	0.400848	0.809838	0.494973	0.620619	NA
YMR194W	1877.31	0.437052	0.200578	2.17896	0.0293347	0.380627
YAL016C-A	2.70393	-1.10283	0.863024	-1.27786	0.201298	NA
YMR167W	519.47	-0.0117197	0.134709	-0.087	0.930672	0.986591
YOR249C	548.808	0.0199894	0.180469	0.110763	0.911804	0.985934
YER117W	6909.57	0.456641	0.24921	1.83235	0.066899	0.470265
YOR301W	473.186	0.0627326	0.118509	0.529347	0.596565	0.872052
YPL187W	22.8546	-0.19074	0.361054	-0.528287	0.5973	0.872052
YKL218C	1535.64	-0.593379	0.475663	-1.24748	0.212222	0.632849
YOR140W	1052.7	0.0889519	0.226892	0.392046	0.695025	0.912763
YDR391C	1344.03	-0.38986	0.290082	-1.34397	0.178959	0.610681
YLL063C	214.944	-0.0986565	0.202437	-0.487343	0.626015	0.882164
YOR276W	2029.94	0.352889	0.134157	2.63042	0.00852788	0.302379
YMR309C	2733.75	0.498784	0.241593	2.06456	0.0389647	0.40633
YOR089C	1519.27	-0.193491	0.126009	-1.53553	0.124653	0.539989
tD(GUC)N	15.5217	-0.466353	0.575031	-0.811005	0.417363	0.791202
YGR258C	990.289	-0.198076	0.146442	-1.35259	0.176188	0.61013
YNL146C-A	33.2593	0.0595889	0.348769	0.170855	0.864338	0.968541
YMR180C	360.138	-0.0665263	0.11385	-0.584332	0.558997	0.857609
YGL163C	657.919	0.0305991	0.151958	0.201365	0.840413	0.965453
YDR417C	5.5223	0.925234	0.85951	1.07647	0.281718	0.700631
YOL131W	3.34587	-0.124891	0.845661	-0.147684	0.882592	NA
YPL283C	1836.38	-0.126883	0.206137	-0.615526	0.538208	0.853439
YBL021C	300.86	-0.0110739	0.193615	-0.0571956	0.954389	0.990229
YHR215W	260.892	-0.233738	0.205264	-1.13872	0.254821	0.672234
YLL045C	12359.9	0.438025	0.203129	2.15639	0.0310533	0.386928
YLR156W	74.5937	-0.55461	0.327303	-1.69448	0.0901732	0.49996
YLR007W	577.979	-0.152146	0.123506	-1.2319	0.217988	0.636458
YNL261W	378.846	0.110524	0.150547	0.734151	0.462857	0.820317
YNL305C	1505.05	-0.429816	0.136362	-3.15203	0.00162139	0.176413
YJL046W	527.36	0.312865	0.158878	1.96922	0.0489279	0.427255
YKR078W	459.173	0.0838856	0.166789	0.502945	0.615003	0.878637
YOR191W	1527.46	-0.124563	0.155216	-0.802517	0.422254	0.794111
YEL074W	55.7379	-0.214496	0.275684	-0.778052	0.436539	0.804303
YDR272W	1932.86	-0.287659	0.143506	-2.0045	0.045016	0.42393
YGR289C	967.929	-0.0947818	0.198476	-0.477548	0.632972	0.885783
YML020W	719.801	-0.193351	0.124305	-1.55546	0.119838	0.533257
YLR103C	435.44	0.225743	0.288583	0.782246	0.43407	0.801634
YOR294W	631.889	0.307981	0.280534	1.09784	0.272275	0.694819
YEL062W	492.741	-0.131646	0.163859	-0.80341	0.421738	0.794111
YPR064W	5.18886	-0.301661	0.618971	-0.487359	0.626004	0.882164
YPR031W	693.323	-0.104613	0.178968	-0.584535	0.55886	0.857609
YLR038C	2255.36	-0.0963196	0.149966	-0.642276	0.520694	0.848908
YNL096C	3294.63	0.277579	0.171313	1.6203	0.105169	0.522399
YDR038C	1694.73	-0.154249	0.131624	-1.1719	0.241239	0.658078
YDL187C	9.765	-0.0118144	0.463172	-0.0255077	0.97965	0.995611
YBR024W	472.897	-0.145658	0.192363	-0.757205	0.448927	0.811443
YER171W	892.217	0.270039	0.171493	1.57464	0.115341	0.530653
YDL047W	1468.04	-0.00752495	0.118326	-0.0635949	0.949293	0.988952
YML046W	747.624	0.315496	0.188093	1.67734	0.0934768	0.50582
YGL124C	663.317	-0.0279486	0.145707	-0.191814	0.847888	0.966859
YMR276W	3028.47	-0.161747	0.13373	-1.2095	0.22647	0.644527
YEL059W	16.1899	-0.228272	0.41037	-0.556258	0.578035	0.864324
YDL160C-A	113.156	0.149846	0.190293	0.787452	0.431017	0.799353
YLR165C	343.534	-0.168315	0.167065	-1.00748	0.313704	0.728124
YCR069W	2197.2	-0.370383	0.13583	-2.72681	0.00639494	0.29102
YGR146C-A	4.90712	0.890572	0.729147	1.22139	0.221939	0.638467
YKL027W	730.084	0.46129	0.111363	4.14222	3.43956e-05	0.0209572
YJL173C	666.65	0.0991425	0.149766	0.661985	0.507981	0.843366
YDR152W	1091.12	0.336451	0.141017	2.38589	0.0170378	0.343433
YKL127W	2165.12	-0.0480579	0.0810005	-0.593304	0.552978	0.855811
YDR309C	2743.78	0.0878688	0.148313	0.592456	0.553545	0.855811
YLR386W	959.746	-0.070261	0.1458	-0.481899	0.629878	0.884201
YLR371W	1555.57	0.00452639	0.113511	0.0398762	0.968192	0.994017
YDL169C	585.337	-0.653172	0.238474	-2.73897	0.00616328	0.29102
YLR092W	4056.08	-3.52833	1.35222	-2.60928	0.0090733	0.30406
YER044C	697.819	0.0360901	0.132944	0.271469	0.786031	0.94614
YMR072W	3096.58	-0.136115	0.108919	-1.2497	0.211411	0.632849
YJR033C	1147.95	-0.243771	0.181496	-1.34312	0.179234	0.610681
YKR056W	945.673	0.277222	0.204528	1.35542	0.175283	0.608546
YGL011C	3137.26	-0.101846	0.123343	-0.825714	0.408967	0.788955
YIR036C	961.154	-0.278504	0.198471	-1.40325	0.160544	0.587395
YMR123W	659.289	0.160121	0.122798	1.30393	0.192256	0.622593
YDR406W	1911.95	0.987093	0.349163	2.82703	0.00469821	0.289946
YGR073C	80.2306	-0.0656079	0.218867	-0.299761	0.764359	0.940757
YGR209C	4588.65	-0.0207635	0.187755	-0.110588	0.911943	0.985934
YJL150W	2.50353	-0.0623386	0.961249	-0.0648516	0.948292	NA
tS(UGA)E	5.26949	0.752504	0.653838	1.1509	0.249773	0.665065
YNL050C	423.903	0.141591	0.1781	0.795011	0.426607	0.795385
YMR304C-A	1396.1	0.589346	0.251179	2.34632	0.01896	0.347498
YLR240W	916.459	-0.226642	0.131894	-1.71836	0.0857312	0.496088
YGR093W	714.616	-0.0689541	0.152988	-0.450714	0.652195	0.896876
YDL234C	2093	-0.209544	0.160048	-1.30925	0.190449	0.622084
YNL136W	862.808	0.0364033	0.111875	0.325392	0.744884	0.932896
YKL049C	595.846	-0.196508	0.170403	-1.15319	0.248832	0.66497
YJR080C	1255.14	0.0618244	0.158695	0.389579	0.696848	0.913488
YNR038W	659.589	0.3307	0.195366	1.69272	0.0905089	0.499973
YGL140C	2243.31	-0.153024	0.191913	-0.797364	0.42524	0.794537
YCL029C	769.14	-0.0677524	0.111247	-0.609028	0.542506	0.854264
YFL038C	5435.11	-0.0967139	0.135185	-0.715419	0.47435	0.824184
YJR131W	599.345	0.0215561	0.146758	0.146881	0.883226	0.976501
YNR012W	884.782	-0.0457664	0.250727	-0.182534	0.855163	0.967165
YNL110C	1075.27	0.343819	0.240034	1.43237	0.152037	0.580359
YDR367W	540.823	0.0604372	0.172315	0.350736	0.725786	0.922866
YIL053W	5632.25	-0.0884649	0.207211	-0.426931	0.669429	0.905836
YPL059W	889.119	0.197329	0.194913	1.0124	0.311348	0.727299
YGL253W	12159	0.80147	0.308676	2.59647	0.00941862	0.30406
YHL032C	2038.38	-0.134126	0.210494	-0.637196	0.523997	0.85071
YJL010C	748.264	0.411025	0.208149	1.97467	0.0483054	0.426295
YHL045W	3.00451	-0.485379	0.826282	-0.587426	0.556918	NA
YOR337W	915.835	-0.256689	0.473386	-0.542239	0.587654	0.868581
YMR010W	906.1	0.30803	0.175483	1.75533	0.0792036	0.489934
YOR097C	396.854	-0.235362	0.135767	-1.73357	0.0829936	0.493349
YHR118C	317.665	-0.0950394	0.164923	-0.576265	0.564436	0.860989
YGR024C	942.085	0.306882	0.123905	2.47675	0.0132585	0.326863
YOL023W	660.739	0.241683	0.156878	1.54058	0.123419	0.538678
YPL253C	375.683	-0.0401983	0.177347	-0.226665	0.820684	0.959942
YER154W	1447.78	0.221489	0.167466	1.32259	0.18597	0.613823
YBR300C	1.33034	-0.242178	1.51862	-0.159472	0.873297	NA
YEL036C	1967.87	0.106751	0.142337	0.749989	0.453262	0.814759
YBR260C	781.553	0.0599708	0.0937047	0.639998	0.522174	0.84956
YPL124W	196.443	0.098384	0.229393	0.428887	0.668005	0.905739
YAL042W	3476.31	0.0704354	0.178546	0.394494	0.693216	0.9122
YAL035W	3942.08	0.352726	0.150036	2.35094	0.0187259	0.347498
YNL286W	601.064	-0.0566033	0.126088	-0.448918	0.653491	0.897794
YDR001C	4830.08	-0.326791	0.253965	-1.28676	0.198179	0.628255
YIL162W	1455.06	0.335842	0.257134	1.3061	0.19152	0.622593
YOL141W	138.016	0.180321	0.267404	0.67434	0.500095	0.841361
YHR145C	100.817	0.375464	0.522052	0.719209	0.472012	0.82349
YBR195C	521.003	-0.27041	0.219542	-1.2317	0.218061	0.636458
YIL039W	2237.14	0.0748916	0.108034	0.693226	0.488168	0.832002
YGR122W	670.628	0.108299	0.136372	0.794145	0.427111	0.795695
YPL092W	1817.54	-0.0613972	0.580182	-0.105824	0.915722	0.985934
YGR161C-D	401.945	0.26618	0.275934	0.964651	0.33472	0.744163
YMR315W	3032	-0.330202	0.212399	-1.55463	0.120033	0.533257
YGR213C	24.2397	0.0685703	0.309301	0.221695	0.824552	0.960298
YDR384C	424.664	0.511786	0.269016	1.90244	0.0571143	0.449714
YML007W	2615.56	0.0222503	0.102073	0.217984	0.827441	0.961141
YER063W	1714.42	-0.131556	0.105808	-1.24335	0.213739	0.633171
YDR481C	4149.71	-0.400592	0.30912	-1.29591	0.195007	0.624726
YER014W	779.672	-0.381106	0.129651	-2.93947	0.00328773	0.238478
YPR041W	2928.11	0.499882	0.16171	3.09123	0.00199328	0.195888
YNL213C	479.566	0.129543	0.180205	0.718862	0.472226	0.82349
YKL006C-A	350.837	0.210771	0.178373	1.18163	0.237351	0.656161
YBR058C	1314.22	0.0581849	0.105422	0.551924	0.581001	0.86464
YLR024C	576.744	-0.00373923	0.244209	-0.0153116	0.987784	0.997463
YLR071C	1329.08	0.12674	0.156157	0.811618	0.417011	0.791202
YHR092C	184.151	-0.399946	0.247895	-1.61337	0.106665	0.522433
YDL199C	467.912	-0.35809	0.161368	-2.21909	0.0264807	0.372012
YHL007C	1893.86	0.143168	0.106271	1.34719	0.177918	0.610681
YER181C	2.5667	-0.588559	0.893745	-0.658532	0.510197	NA
YNL228W	3.44719	0.167294	0.806913	0.207325	0.835756	NA
YDL064W	788.688	-0.105544	0.125254	-0.842637	0.399432	0.784492
YDL031W	1421.89	0.357175	0.19492	1.83242	0.0668895	0.470265
YMR257C	653.859	0.435317	0.17937	2.42693	0.0152273	0.33843
YDR046C	3357.52	-0.171545	0.285847	-0.600128	0.548421	0.855811
YOR253W	649.044	0.119325	0.178008	0.670332	0.502646	0.841361
YOR202W	1191.76	-0.329074	0.309637	-1.06277	0.287885	0.706495
YGL245W	8760.25	-0.0651976	0.152082	-0.4287	0.668142	0.905739
YGR006W	168.93	0.0864256	0.139533	0.619392	0.535658	0.852987
YGR079W	664.047	-0.198488	0.534153	-0.371594	0.710195	0.917366
YDL119C	308.074	-0.0691109	0.17793	-0.388416	0.697708	0.914323
YKL151C	1553.27	-0.535563	0.228209	-2.34681	0.0189351	0.347498
YGL198W	1229.76	-0.149326	0.155848	-0.958156	0.337984	0.746137
YDL086W	1453.42	-0.197402	0.168715	-1.17003	0.241988	0.658618
YBL091C-A	382.864	-0.241708	0.18946	-1.27577	0.202036	0.6285
YLR361C-A	216.407	-0.100062	0.139399	-0.717811	0.472874	0.823954
YHR038W	353.381	0.463639	0.223872	2.071	0.0383589	0.40633
YML069W	2527.44	0.0576454	0.0874953	0.65884	0.509998	0.843366
YKR019C	379.993	-0.34705	0.151909	-2.28459	0.0223368	0.355869
YJR073C	8446.98	0.247936	0.297024	0.834733	0.403868	0.786619
YGR279C	14921.4	-0.11484	0.14222	-0.807486	0.419386	0.791202
YCR073C	437.836	0.315111	0.126903	2.48309	0.0130248	0.326863
YCR022C	5.64711	0.31191	0.621011	0.502262	0.615483	0.878637
YLL015W	1693.57	-0.117929	0.168694	-0.699071	0.484508	0.829975
YNL195C	126.759	-1.09053	0.66468	-1.64068	0.100864	0.519268
YDL134C	2272.57	-0.0952511	0.0929245	-1.02504	0.305346	0.724589
YFL060C	199.279	0.134452	0.163563	0.82202	0.411065	0.788955
YDR173C	309.345	-0.113791	0.209987	-0.541892	0.587893	0.868581
YMR100W	801.563	0.0274785	0.143576	0.191387	0.848223	0.966859
YCL057W	2955.57	0.0168917	0.135307	0.12484	0.90065	0.983051
YBR072W	4386.88	-1.03786	1.06729	-0.972427	0.330838	0.741374
YBR005W	523.961	-0.415466	0.219566	-1.89222	0.0584623	0.454313
YPR123C	60.9919	-0.431456	0.241863	-1.78389	0.0744419	0.482063
RUF5-2	1657.26	1.11636	0.622167	1.79431	0.0727639	0.481902
YDL173W	1377.04	-0.00177845	0.148967	-0.0119385	0.990475	0.997621
YJR047C	29.7851	-0.392388	0.333913	-1.17512	0.239946	0.65705
YMR006C	2319.76	0.287399	0.207745	1.38342	0.166535	0.60125
YKL145W-A	26.2767	-0.762175	0.486546	-1.5665	0.117231	0.532749
YAL016W	3478.35	-0.0791319	0.118084	-0.670133	0.502773	0.841361
YMR292W	637.677	0.273231	0.199031	1.3728	0.169813	0.603413
YHR011W	323.096	-0.0757611	0.162039	-0.467548	0.640108	0.890106
YPL152W	480.445	-0.0205689	0.154687	-0.132971	0.894216	0.980565
YLR183C	1063.98	0.0773271	0.207907	0.371932	0.709943	0.917366
YNL077W	1567.57	-0.014473	0.73862	-0.0195946	0.984367	0.9968
YBR109C	2620.96	-0.045628	0.113766	-0.401068	0.68837	0.911761
YBR172C	1333.56	0.341816	0.174139	1.96289	0.0496585	0.427893
YDR346C	2818	0.000457734	0.111516	0.00410465	0.996725	0.998617
YAR002C-A	2900.55	0.173311	0.135484	1.2792	0.200828	0.6285
YOL077W-A	1675.87	0.161236	0.273211	0.590149	0.55509	0.855811
YPL029W	440.547	0.272109	0.132541	2.05302	0.0400702	0.411023
YHR146W	3919.19	-0.2523	0.146961	-1.71679	0.0860185	0.496088
YDL242W	3.25716	-1.33382	0.885891	-1.50563	0.132163	NA
YBR189W	11711.1	0.430998	0.213931	2.01466	0.0439403	0.419637
YER085C	5.46536	-0.994361	0.634801	-1.56641	0.117252	0.532749
YJL225C	2374.25	-0.319554	0.17395	-1.83704	0.0662035	0.469958
YKL064W	2113.27	-0.0367562	0.190566	-0.192879	0.847053	0.966859
YLR265C	574.786	0.0386641	0.185186	0.208785	0.834616	0.963518
YKR022C	657.361	-0.0610488	0.110939	-0.550294	0.582118	0.865084
YLR287C	552.446	0.264123	0.193299	1.3664	0.171814	0.603786
YPL174C	685.759	0.0932562	0.189722	0.491543	0.623043	0.881741
YOR070C	1060.44	-0.155573	0.0882509	-1.76285	0.0779261	0.488191
YDR403W	96.3494	0.145539	0.211798	0.687157	0.491984	0.835002
YOL093W	443.38	0.112419	0.19935	0.563926	0.572804	0.862817
YOL042W	583.057	-0.0716876	0.133107	-0.538572	0.590182	0.868825
YIL070C	1180.88	0.572308	0.234542	2.44011	0.0146828	0.333814
YCL037C	14.0092	0.491502	0.387052	1.26986	0.204135	0.6285
YIL025C	3.59581	0.471668	0.829324	0.568737	0.569534	0.862148
YDR545C-A	22.6166	-0.580471	0.800882	-0.72479	0.468581	0.821982
YNR071C	39.3151	-0.471324	0.344125	-1.36963	0.170802	0.603413
YML131W	1170.89	-0.10708	0.0837945	-1.27789	0.201288	0.6285
YNL245C	330.436	-0.20487	0.130539	-1.56941	0.116552	0.531152
YNR024W	310.557	0.346774	0.18604	1.86397	0.0623252	0.45797
YFL013W-A	3.17288	-0.0938145	0.794894	-0.118021	0.906051	NA
YLR329W	23.4579	-0.002231	0.416356	-0.00535841	0.995725	0.998608
YPL043W	1195.05	0.35623	0.288286	1.23568	0.216577	0.635538
YCL045C	3320.17	0.0693507	0.100211	0.692048	0.488907	0.83282
YBR056C-B	1.76664	-0.424251	1.17868	-0.359938	0.718894	NA
YKL002W	1661.4	-0.108979	0.157577	-0.691591	0.489194	0.83282
YDR328C	1970.74	-0.087412	0.147703	-0.59181	0.553978	0.855811
YIR009W	136.906	0.010745	0.201344	0.0533663	0.95744	0.991617
YBR154C	1458.16	0.35345	0.149996	2.3564	0.0184532	0.347498
YLR001C	1250	-0.215502	0.144759	-1.4887	0.136567	0.557558
YKR101W	355.38	-0.0453145	0.177812	-0.254845	0.798843	0.952426
YMR230W-A	2.99976	0.37206	0.919486	0.404639	0.685743	NA
YER115C	404.075	0.099066	0.135637	0.730374	0.465162	0.821945
YHR124W	107.773	0.0246176	0.176287	0.139645	0.888941	0.978935
YER148W	1604.27	0.0387834	0.09559	0.405726	0.684944	0.910817
YMR240C	462.299	-0.0621824	0.1965	-0.31645	0.751661	0.936585
YOR303W	7923.77	-0.466821	0.507146	-0.920487	0.357319	0.75938
YIL087C	558.366	-0.529311	0.220329	-2.40236	0.0162895	0.342884
YMR192W	604.42	0.209238	0.141612	1.47754	0.13953	0.563017
YJL221C	237.391	-0.0248425	0.220754	-0.112535	0.910399	0.985424
YMR229C	2558.18	0.531223	0.232718	2.28269	0.0224486	0.355869
YLL038C	342.337	-0.011605	0.130633	-0.0888363	0.929212	0.986591
YOR056C	1140.07	0.132838	0.190089	0.698822	0.484663	0.829975
YOL108C	597.92	-0.149951	0.167081	-0.897474	0.369466	0.76596
YOR270C	8809.03	-0.0807856	0.145362	-0.555754	0.578379	0.864324
YDR106W	24.5562	0.168827	0.318432	0.530181	0.595986	0.872052
YOL068C	1740.2	0.0306934	0.106624	0.287866	0.773449	0.941354
YMR182C	250.839	-0.151606	0.154387	-0.981985	0.326107	0.735034
YBR201W	435.695	0.221128	0.209502	1.05549	0.2912	0.710564
YLL043W	1902.11	0.0357369	0.0955155	0.374148	0.708294	0.916719
YDR415C	663.863	-0.0064252	0.125097	-0.0513616	0.959037	0.992092
YGL161C	1639.16	-0.189442	0.114532	-1.65406	0.0981157	0.514917
YOL133W	404.999	-0.162868	0.151169	-1.07739	0.281307	0.700251
YDL074C	1367.13	0.115272	0.171133	0.673586	0.500575	0.841361
YNL263C	1342.22	0.0298072	0.107202	0.278047	0.780977	0.944542
YHR217C	17.4928	0.000555505	0.352737	0.00157484	0.998743	0.999454
YDR128W	1212	-0.125503	0.0919153	-1.36542	0.172123	0.604463
YOR193W	305.365	0.169326	0.254417	0.665547	0.505701	0.842576
YER028C	61.7115	-0.190743	0.217968	-0.875097	0.381521	0.773838
YMR052W	175.25	0.070922	0.182697	0.388194	0.697872	0.914323
YMR294W-A	4.34478	0.4547	0.724851	0.627302	0.530461	0.851984
YKR076W	1049.57	-0.38799	0.200103	-1.93895	0.0525076	0.434096
YDR225W	10544.5	-0.308287	0.303628	-1.01534	0.309942	0.726066
YDR270W	805.401	-0.165469	0.185227	-0.893327	0.371682	0.767136
tL(UAG)J	12.8417	1.43406	0.525622	2.72831	0.00636604	0.29102
YPR033C	4077.01	0.179641	0.124169	1.44674	0.147969	0.574386
YGR230W	282.755	-0.135793	0.138005	-0.983971	0.32513	0.735034
YPR062W	1392.48	0.0825619	0.112363	0.734775	0.462477	0.820317
YDR528W	449.812	0.304894	0.306112	0.996023	0.319239	0.733226
YER173W	501.253	-0.0119999	0.154908	-0.0774646	0.938254	0.987334
YBR026C	2347.96	-0.244521	0.155022	-1.57734	0.114718	0.529927
YDL185W	12503.5	-0.224955	0.223679	-1.0057	0.314558	0.728468
YBR091C	128.274	0.596069	0.235128	2.53508	0.011242	0.311703
YNL094W	1333.28	-0.123843	0.0726678	-1.70423	0.0883373	0.498542
YGL056C	1243.84	0.187123	0.140872	1.32832	0.184072	0.61195
YPL227C	718.776	0.167829	0.141207	1.18853	0.234623	0.653663
YLR222C-A	14.6378	0.270606	0.460964	0.587043	0.557175	0.857073
YDL010W	857.004	-0.139861	0.101106	-1.38331	0.16657	0.60125
YML019W	839.579	0.142791	0.123457	1.1566	0.247435	0.662691
YDL045C	869.764	-0.0157946	0.118613	-0.13316	0.894066	0.980565
YLR163C	982.436	0.272703	0.169557	1.60832	0.107764	0.524556
YLR178C	2589.99	-0.930816	0.365521	-2.54655	0.0108795	0.311703
YHL002C-A	1.5287	-0.966943	1.33541	-0.724077	0.469019	NA
YBL079W	1366.51	0.374313	0.177938	2.10362	0.0354118	0.401049
YNL056W	628.758	-0.0468434	0.104293	-0.44915	0.653323	0.897767
YFL001W	486.436	0.303338	0.18736	1.61901	0.105446	0.522399
YDR150W	2290.56	-0.0965827	0.187905	-0.513998	0.607254	0.874835
YER147C-A	8.63632	0.160075	0.717998	0.222947	0.823577	0.960116
YKL170W	528.636	0.263376	0.199352	1.32116	0.186447	0.614587
YPR157W	265.226	0.11583	0.295803	0.391578	0.69537	0.912855
YPR137C-B	1699.3	-0.59499	1.60018	-0.371826	0.710023	0.917366
YLR384C	2439.89	0.230451	0.150363	1.53263	0.125367	0.539989
YPL060W	338.855	-0.0584999	0.109245	-0.535493	0.592309	0.869833
YML099C	1417.48	-0.17257	0.214867	-0.803148	0.421889	0.794111
YLR421C	1185.16	0.101928	0.111601	0.913323	0.361072	0.762306
YLR090W	648.654	0.209494	0.18032	1.16179	0.245321	0.661389
YJR064W	3024.36	0.21569	0.0957805	2.25192	0.0243276	0.364748
YML022W	1423.93	0.553847	0.199986	2.76943	0.00561544	0.29102
YER046W	376.407	-0.297953	0.14082	-2.11584	0.0343587	0.397212
YMR029C	1458.87	-0.0610297	0.145252	-0.420164	0.674366	0.907266
YIR030C	379.627	-0.394702	0.557257	-0.708295	0.478762	0.825906
YKR050W	641.311	-0.106027	0.125075	-0.847714	0.396597	0.783844
YMR121C	663.26	0.00701298	0.145337	0.0482532	0.961514	0.992304
YGL017W	437.992	-0.154184	0.116512	-1.32333	0.185724	0.61371
YDL150W	616.233	0.351565	0.22026	1.59614	0.110458	0.526116
YNL038W	605.674	0.240505	0.226372	1.06243	0.288039	0.706531
YHR001W-A	1604.1	-0.113751	0.149007	-0.763394	0.445229	0.81002
YOL165C	8.62106	-0.516697	0.570773	-0.905258	0.365329	0.763835
YIL139C	242.784	0.442241	0.196026	2.25603	0.0240686	0.362995
YLR246W	1140.34	-0.399457	0.229965	-1.73704	0.0823809	0.492901
YJR119C	431.133	-0.125302	0.237083	-0.528516	0.597141	0.872052
YLR359W	7967.57	-0.21363	0.322335	-0.662757	0.507486	0.843366
YLR199C	796.986	0.14254	0.0879943	1.61987	0.105259	0.522399
YJL206C	415.552	-0.298877	0.141254	-2.11588	0.034355	0.397212
YIL142W	2978.27	0.142956	0.087252	1.63843	0.101332	0.519268
YGL082W	1508.33	-0.132414	0.10339	-1.28073	0.200289	0.6285
YNL138W	4059.84	-0.0997694	0.124368	-0.802213	0.42243	0.794111
YOR133W	20115.9	0.149541	0.133082	1.12368	0.26115	0.680217
21S_rRNA	66.7196	0.824721	0.306957	2.68676	0.0072148	0.29102
YGL142C	776.755	-0.0801888	0.147468	-0.543772	0.586598	0.868581
YGR179C	504.766	-0.130487	0.109997	-1.18628	0.235511	0.654289
YGR102C	556.926	-0.242917	0.0989546	-2.45483	0.0140952	0.333447
YBR139W	4039.36	-0.366114	0.228247	-1.60402	0.108709	0.524556
YHR188C	2482.76	-0.108199	0.11668	-0.927318	0.353762	0.758167
YNL116W	951.869	-0.283496	0.208395	-1.36038	0.173709	0.606887
YNL139C	1092.38	0.114236	0.189375	0.603224	0.54636	0.855811
YDR361C	932.369	0.254528	0.161655	1.57452	0.115368	0.530653
YLR445W	1.2635	0.0071893	1.20389	0.00597175	0.995235	NA
YGL255W	4495.93	-0.455073	0.803584	-0.566305	0.571187	0.862737
YFR007W	381.69	0.116766	0.172546	0.676725	0.498581	0.840346
YLR333C	2188.06	0.397934	0.166199	2.39432	0.0166513	0.342884
YHR103W	1726.76	-0.131265	0.121747	-1.07818	0.280952	0.700182
YHL030W	878.538	0.122999	0.149131	0.824771	0.409501	0.788955
YGL077C	4116.94	0.265842	0.15646	1.6991	0.0892998	0.499636
YPL204W	3024.61	-0.0841375	0.0924176	-0.910406	0.362609	0.762842
YIL009C-A	456.371	-0.280497	0.165409	-1.69577	0.0899289	0.49996
YOR091W	799.272	0.355497	0.188635	1.88457	0.0594877	0.45535
YGR026W	2700.13	0.00102601	0.135423	0.0075763	0.993955	0.998215
YAL040C	1686.08	-0.182713	0.133001	-1.37377	0.169515	0.603413
YDR288W	524.333	0.0849144	0.1076	0.78917	0.430013	0.798695
YGL208W	724.882	-0.43114	0.175945	-2.45042	0.0142688	0.333561
YNL284C	980.779	0.335094	0.204354	1.63977	0.101053	0.519268
YIL164C	2160.67	-0.639026	1.13177	-0.564627	0.572328	0.862737
YOL143C	1782.74	0.269943	0.215624	1.25191	0.210602	0.632849
YBR237W	906.961	0.0240568	0.107808	0.223144	0.823423	0.960116
YBR197C	442.275	-0.0662904	0.129256	-0.512862	0.608048	0.874835
YHR147C	727.766	0.381152	0.219903	1.73327	0.0830474	0.493349
YJL093C	1372.7	-0.166065	0.0925366	-1.79458	0.0727202	0.481902
YPL126W	1916.89	0.314553	0.242537	1.29692	0.194657	0.624726
YMR317W	19.3822	-0.221551	0.43438	-0.51004	0.610024	0.875589
YOR251C	1235.96	-0.149002	0.119883	-1.2429	0.213906	0.633171
YPR181C	4762.52	0.0326675	0.0848103	0.385183	0.700102	0.91521
YCL008C	683.42	-0.17704	0.124202	-1.42541	0.154037	0.582047
YOR107W	946.829	-0.5544	0.566364	-0.978876	0.327641	0.736525
YML005W	354.96	0.0859678	0.136139	0.631469	0.527734	0.851041
YNL215W	920.679	-0.123263	0.102273	-1.20524	0.228111	0.646671
YCR075W-A	208.842	-0.187627	0.183753	-1.02108	0.307215	0.725603
YDL059C	606.924	-2.52063	1.0203	-2.47048	0.0134932	0.328856
YOR204W	3382.12	-0.0081862	0.206883	-0.0395693	0.968437	0.994017
YEL012W	1568.73	-0.34194	0.160039	-2.1366	0.0326302	0.390774
YBL040C	1358.51	0.483168	0.191194	2.52711	0.0115006	0.314229
YPR043W	6343.13	0.334118	0.22079	1.51329	0.130207	0.547298
YDR382W	8629.97	0.389871	0.168341	2.31596	0.0205606	0.352479
YDR483W	5390.99	-0.0525164	0.140522	-0.373723	0.70861	0.916719
YER061C	744.384	-0.295674	0.31164	-0.948768	0.342739	0.747961
YLR022C	402.364	0.224345	0.125308	1.79035	0.0733975	0.481909
YLR402W	73.0121	-0.374658	0.254601	-1.47155	0.141141	0.568015
YLR073C	108.652	0.248314	0.355204	0.699075	0.484505	0.829975
YER183C	443.183	-0.0506271	0.143586	-0.352591	0.724395	0.922225
YHR090C	441.799	0.0362869	0.131862	0.27519	0.783171	0.944922
YOL021C	1604.5	0.219658	0.135532	1.62072	0.105078	0.522399
YHR030C	1768.56	0.0705509	0.170076	0.414821	0.678273	0.90809
YBR295W	508.342	-0.0958103	0.136835	-0.700191	0.483808	0.829975
YKL018W	328.547	0.146191	0.140068	1.04372	0.296616	0.716891
YIL011W	110.449	0.182391	0.204219	0.893114	0.371796	0.767136
YEL034W	7339.79	0.267328	0.1649	1.62115	0.104986	0.522399
YHL015W	9885.28	0.439658	0.187577	2.34389	0.019084	0.347498
YNR050C	18426.5	-0.552747	1.39689	-0.395699	0.692327	0.9122
YDR134C	8663.17	-0.230962	0.253639	-0.910593	0.36251	0.762842
YKL208W	296.435	-0.0229026	0.162963	-0.140538	0.888235	0.978935
YGR004W	294.533	0.225463	0.150809	1.49502	0.134908	0.553869
YML110C	2314.87	0.0460611	0.181863	0.253273	0.800057	0.952426
YGL048C	3732.64	-0.0905614	0.123684	-0.732198	0.464048	0.820976
YGL243W	415.75	0.0754724	0.0962376	0.78423	0.432905	0.800999
YKL106W	553.514	0.017011	0.225742	0.075356	0.939931	0.987334
tN(GUU)N1	11.5536	-0.188988	0.533695	-0.354112	0.723255	0.922225
YPR029C	1676.6	0.0341226	0.159556	0.213859	0.830657	0.962913
YJL034W	16840	0.293285	0.400419	0.732445	0.463897	0.820948
YFL048C	1524.83	0.107758	0.114655	0.939845	0.347297	0.752693
YLR117C	901.21	0.0814946	0.0845084	0.964337	0.334877	0.744163
YOR176W	2337.87	-0.142097	0.177505	-0.800527	0.423406	0.794111
YOR109W	1488.46	0.0915916	0.14459	0.633457	0.526435	0.851041
YBL089W	604.43	-0.0843795	0.085656	-0.985097	0.324576	0.735034
YDL084W	8171.58	0.0900848	0.0907181	0.993019	0.320701	0.734283
YGL116W	834.371	-0.100944	0.120648	-0.83668	0.402773	0.786064
YNR034W-A	2795.33	-0.473393	0.875165	-0.540918	0.588564	0.868628
YCR024C	333.982	0.383811	0.149916	2.56018	0.0104617	0.309967
YIL102C-A	170.851	-0.00685274	0.199074	-0.034423	0.97254	0.994017
YMR102C	881.581	0.390035	0.242912	1.60566	0.108348	0.524556
YCR071C	449.682	0.34696	0.229249	1.51346	0.130162	0.547298
YDR175C	749.959	0.316663	0.195248	1.62185	0.104835	0.522399
YOR189W	480.355	-0.0577152	0.14328	-0.402814	0.687085	0.911761
YOR154W	635.115	0.00407542	0.220622	0.0184724	0.985262	0.99707
YPR121W	639.829	-0.169509	0.127875	-1.32559	0.184976	0.613247
YBR070C	499.981	-0.0735956	0.136246	-0.540169	0.58908	0.868628
YOR396C-A	2.98743	-5.02888	3.39614	-1.48076	0.13867	NA
YLL017W	6.15774	-0.532553	0.594455	-0.895868	0.370323	0.76648
YDR351W	856.98	0.104688	0.156202	0.670205	0.502727	0.841361
YNL315C	1473.01	0.107965	0.163575	0.66003	0.509235	0.843366
YPR174C	367.173	0.0125312	0.145863	0.0859104	0.931538	0.986591
YJR045C	19381.5	0.293187	0.327272	0.895852	0.370332	0.76648
YMR008C	3967.25	-0.150025	0.117776	-1.27382	0.202727	0.6285
YDR349C	1954.03	0.0266094	0.0697866	0.381297	0.702983	0.916209
YDL171C	8722.3	-0.453222	0.271622	-1.66858	0.0952012	0.50925
YKL062W	2617.65	-0.306721	0.181073	-1.69391	0.0902833	0.499973
YJR010W	7299.76	-3.56086	1.37569	-2.58841	0.00964194	0.305779
YJL218W	38.7615	0.14159	0.31935	0.443371	0.657497	0.900605
YIL126W	2045.19	0.145773	0.113571	1.28355	0.1993	0.6285
YDR093W	1345.08	0.272887	0.161862	1.68592	0.0918118	0.500659
YMR282C	634.446	0.320814	0.157316	2.0393	0.0414198	0.41607
YIL109C	4111.76	-0.0105818	0.120652	-0.087705	0.930111	0.986591
YFL022C	4011.96	0.17511	0.140128	1.24964	0.211431	0.632849
YPL109C	806.342	-0.317946	0.167447	-1.89879	0.0575917	0.452199
YJL156C	926.411	-0.0745269	0.125473	-0.593967	0.552534	0.855811
YNL071W	5935.01	-0.174733	0.1777	-0.983304	0.325458	0.735034
YMR088C	4063.57	-0.556763	0.391465	-1.42226	0.154952	0.582452
YGR211W	2757.26	0.276246	0.603569	0.457687	0.647177	0.894599
YKL139W	462.242	0.0596282	0.178024	0.334944	0.737667	0.929267
YJL069C	490.88	0.498468	0.299183	1.6661	0.0956941	0.50925
YDR323C	268.798	0.0151895	0.131853	0.1152	0.908286	0.984467
YDR344C	24.3902	-0.637616	0.3545	-1.79864	0.0720762	0.481902
YJL016W	1166.39	-0.381422	0.235213	-1.62161	0.104887	0.522399
YDR444W	989.378	-0.139525	0.118591	-1.17652	0.239389	0.656435
YPL189W	50.3595	-0.204402	0.271359	-0.753255	0.451297	0.812799
YLR285W	765.421	0.250707	0.144009	1.74092	0.0816975	0.492901
YLR267W	79.3738	-0.221093	0.33066	-0.66864	0.503725	0.84203
YDL219W	439.364	0.304882	0.158179	1.92745	0.0539242	0.440429
YNL017C	1.69528	0.327417	1.06581	0.307201	0.75869	NA
YCR024C-A	2293.5	-0.0749931	0.229226	-0.327158	0.743548	0.931998
YCR024C-B	4626.6	-0.118917	0.351258	-0.338546	0.734952	0.926752
YKR024C	409.126	0.460562	0.331169	1.39072	0.164312	0.59699
YBR156C	481.691	0.0892218	0.126202	0.706978	0.47958	0.826652
YOR076C	495.468	0.176846	0.176248	1.00339	0.31567	0.729935
YEL059C-A	206.434	-0.1799	0.224732	-0.80051	0.423415	0.794111
YDR405W	807.197	0.229591	0.187772	1.22271	0.22144	0.638209
YOL091W	116.523	-0.0967493	0.329119	-0.293964	0.768785	0.940982
YCL031C	944.376	0.450526	0.170521	2.64206	0.00824028	0.302379
YIL027C	595.575	0.383609	0.197157	1.94571	0.0516898	0.434028
YLR459W	834.281	0.199707	0.184588	1.08191	0.279293	0.698577
YNL243W	3190.53	-0.0257003	0.128945	-0.199312	0.842018	0.965453
YNR026C	704.718	0.149798	0.114215	1.31155	0.189672	0.620995
YHL044W	126.123	-0.102423	0.218083	-0.469649	0.638606	0.889197
YPR204W	6573.86	-0.148522	0.116956	-1.2699	0.20412	0.6285
YNL297C	1169.53	0.196537	0.22862	0.859665	0.389973	0.777485
YBR170C	928.92	-0.101625	0.0953501	-1.06581	0.286509	0.704764
YGR149W	1014.21	0.168466	0.201661	0.835392	0.403497	0.786619
YDR458C	1465.11	-0.0231455	0.115316	-0.200714	0.840922	0.965453
YKL193C	1438.86	-0.247756	0.16131	-1.5359	0.124563	0.539989
YPR099C	18.0868	-0.884964	0.362098	-2.44399	0.0145257	0.333814
YOR135C	1.51179	0.0784302	1.29281	0.0606663	0.951625	NA
YLR310C	2508.87	0.115884	0.149883	0.773167	0.439423	0.805957
YNR008W	785.979	0.0937434	0.114117	0.821468	0.41138	0.788955
YBR301W	5.32605	-0.0442714	0.610171	-0.0725557	0.94216	0.988252
YLR003C	557.182	0.437172	0.189231	2.31025	0.0208741	0.353236
YER113C	849.826	0.19753	0.132961	1.48562	0.137379	0.557558
YHR122W	511.422	0.076844	0.154727	0.496641	0.619442	0.880113
YHL017W	756.165	0.150371	0.151706	0.991199	0.321589	0.734283
YJR010C-A	281.748	0.239551	0.238625	1.00388	0.315437	0.729672
YIL085C	1325.56	0.055039	0.0803085	0.685345	0.493126	0.836122
YMR190C	593.547	-0.0758898	0.0988523	-0.767709	0.44266	0.807752
YLR325C	4618.18	0.541689	0.205425	2.63692	0.00836625	0.302379
YOR272W	1037.63	0.347514	0.217559	1.59733	0.110191	0.526116
YOR058C	601.139	0.0755788	0.134898	0.560265	0.575299	0.864012
YAL064W-B	26.71	-0.285788	0.312237	-0.915291	0.360039	0.760848
YDR413C	3.02808	0.776808	0.912678	0.851131	0.394697	NA
YBR203W	784.319	-0.0906443	0.20635	-0.439274	0.660463	0.901558
YAR029W	32.5843	0.325484	0.285857	1.13862	0.25486	0.672234
YNL238W	1822.69	-0.118861	0.12479	-0.952492	0.340848	0.74709
YJL198W	1415.29	0.159524	0.215262	0.741068	0.458652	0.818615
YOL135C	281.571	-0.0478533	0.121852	-0.392716	0.694529	0.912763
YOR323C	2900.13	-0.0231686	0.113111	-0.204831	0.837704	0.964567
YLL041C	3993.45	-0.303321	0.256859	-1.18089	0.237648	0.656315
YKR074W	1226.3	0.131657	0.170652	0.771496	0.440413	0.806079
YMR274C	288.653	0.153095	0.125079	1.22399	0.220954	0.638209
YER026C	4789.24	0.477659	0.235325	2.02979	0.0423783	0.416469
YMR201C	494.427	-0.0233184	0.123458	-0.188877	0.850189	0.966884
YLR069C	1508.26	0.521716	0.275947	1.89064	0.0586727	0.454313
YML042W	367.973	-0.670757	0.244028	-2.74869	0.00598335	0.29102
YMR050C	993.118	0.150027	0.476286	0.314993	0.752767	0.936999
YDR069C	741.537	0.0783731	0.158674	0.493927	0.621358	0.88045
YOR298W	54.492	-0.123267	0.250027	-0.493014	0.622003	0.881159
YEL066W	1133.54	-0.343451	0.333829	-1.02882	0.303562	0.722759
YPR035W	45788.2	-0.436518	0.400872	-1.08892	0.27619	0.696434
YDR014W	337.514	-0.0890515	0.237993	-0.374177	0.708273	0.916719
YDR227W	936.272	0.0326286	0.179617	0.181656	0.855853	0.967165
YPR060C	575.887	0.0182075	0.208267	0.0874239	0.930335	0.986591
YMR037C	1576.09	-0.0695514	0.0839592	-0.828395	0.407447	0.788955
YCR038C	379.963	-0.204236	0.111707	-1.82832	0.0675022	0.471664
YNL257C	1390.71	-0.026787	0.17919	-0.149489	0.881167	0.976359
YCR072C	354.587	0.263481	0.315137	0.836085	0.403107	0.786398
YBR093C	468.434	-0.0983007	0.153207	-0.64162	0.52112	0.848979
YNL092W	171.9	-0.340411	0.254839	-1.33579	0.181619	0.61195
YGR045C	14.3011	-0.514521	0.480236	-1.07139	0.283993	0.701407
YAL037C-B	20.4607	0.315954	0.816408	0.387005	0.698753	0.914746
YLR134W	527.024	-0.139981	0.227554	-0.615154	0.538453	0.853439
YMR203W	2902.16	0.301468	0.225756	1.33537	0.181756	0.61195
YKL096C-B	2.83746	-1.20069	0.9013	-1.33217	0.182804	NA
YPL225W	2382.36	0.071243	0.142239	0.500866	0.616465	0.878831
YPL270W	1601.01	-0.131137	0.0928708	-1.41204	0.157939	0.584287
YDL012C	487.931	0.067873	0.157411	0.431184	0.666334	0.904831
YDR218C	9.89511	-0.196041	0.530673	-0.369419	0.711815	0.91818
YLR299W	3315.26	-0.467836	0.309124	-1.51343	0.130172	0.547298
YFL003C	55.3901	0.0285264	0.275549	0.103526	0.917546	0.985934
YPL051W	308.005	0.0705166	0.14268	0.49423	0.621144	0.88045
YNL054W	980.295	0.023546	0.112379	0.209524	0.834039	0.96347
YDR156W	350.722	0.137469	0.178934	0.768262	0.442331	0.807752
YPL062W	2.10258	0.575649	1.24685	0.461684	0.644308	NA
YPR155C	1158.49	-0.0418642	0.150688	-0.27782	0.78115	0.944542
YOR137C	915.637	-0.276417	0.144834	-1.90852	0.0563245	0.448022
YKL123W	146.129	0.0351171	0.163059	0.215364	0.829484	0.962308
YKL172W	1534.82	0.408633	0.25659	1.59255	0.11126	0.526735
YNL336W	1328.77	-0.287631	0.153837	-1.86971	0.0615237	0.456951
YDR305C	430.934	-0.0605572	0.0979884	-0.618004	0.536573	0.852987
YJL057C	1311.3	-0.405924	0.249187	-1.62899	0.103314	0.522399
YPR100W	990.858	0.33949	0.237674	1.42839	0.153181	0.581599
YDR358W	1385.89	-0.299806	0.210156	-1.42658	0.1537	0.582047
YJL152W	4.28703	0.150513	0.772216	0.19491	0.845463	0.966131
YLR096W	1092.61	0.253024	0.153269	1.65085	0.0987695	0.51769
YKR052C	398.974	0.0390756	0.118082	0.33092	0.740705	0.930747
YLR427W	1072.59	-0.0418362	0.10113	-0.413687	0.679104	0.90822
YGL015C	6.84326	0.812986	0.6139	1.3243	0.185405	0.61371
YEL064C	642.077	-0.0201861	0.151601	-0.133153	0.894072	0.980565
YMR127C	312.422	0.0440978	0.230377	0.191415	0.8482	0.966859
YIL140W	2147.98	0.115338	0.151912	0.759247	0.447705	0.810564
YOL163W	104.892	-1.81828	0.749575	-2.42575	0.0152767	0.33843
YLR197W	3637.75	0.73807	0.16555	4.4583	8.2614e-06	0.00838945
YBR213W	456.974	-2.0794	0.940989	-2.2098	0.0271191	0.372376
YAL064W	3.34024	-1.30845	1.0465	-1.25031	0.211186	NA
YJL204C	588.547	-0.00618554	0.222201	-0.0278375	0.977792	0.994827
YLR244C	2811.71	0.16136	0.100164	1.61097	0.107187	0.52373
YJR084W	573.592	-0.0395872	0.10677	-0.370771	0.710808	0.917769
YLR233C	550.603	0.0132118	0.157784	0.0837339	0.933268	0.987126
YDL238C	707.109	-0.539432	0.482633	-1.11769	0.263701	0.685173
YGL084C	1265.84	0.159882	0.153617	1.04078	0.297977	0.717988
YLR382C	1239.28	0.122018	0.144459	0.844661	0.3983	0.783962
YLR154C-H	8.07385	0.635567	1.05693	0.601332	0.547619	0.855811
YLR154C-G	165.737	-0.111163	0.275234	-0.403886	0.686297	0.911436
YGR238C	566.534	0.201746	0.172024	1.17278	0.240885	0.658078
YDR363W	611.573	0.0514408	0.145846	0.352707	0.724308	0.922225
YNL114C	9.38985	-0.195695	0.467186	-0.41888	0.675304	0.907505
YNL163C	1412.4	0.0099858	0.168408	0.0592954	0.952717	0.989843
snR55	4.82182	0.544862	0.88496	0.61569	0.538099	0.853439
snR54	2.49308	-0.614681	1.06531	-0.576998	0.563941	NA
snR57	11.7453	1.09222	0.560919	1.9472	0.0515112	0.434028
YHR009C	1639.77	0.0709376	0.145451	0.487709	0.625756	0.882164
snR50	7.26937	0.325098	0.65793	0.494122	0.62122	0.88045
YFR050C	2515.82	-0.00396052	0.115429	-0.0343113	0.972629	0.994017
YLR331C	1.63084	-0.667881	1.08915	-0.613213	0.539735	NA
YNR069C	734.021	-0.432218	0.511461	-0.845066	0.398074	0.783962
YOL058W	24884.1	-0.469298	1.17772	-0.398482	0.690275	0.911761
YAR019C	534.839	-0.262474	0.141632	-1.85322	0.0638515	0.46455
YOR024W	1.45564	2.21339	1.39486	1.58682	0.112553	NA
YML129C	550.894	0.160933	0.253434	0.63501	0.525422	0.851041
YGL257C	1371.62	0.179864	0.136861	1.31422	0.188774	0.619051
YGR020C	3000.73	-0.0541086	0.144374	-0.37478	0.707824	0.916719
YOR093C	910.651	0.269019	0.161226	1.66859	0.0951992	0.50925
YAL046C	366.451	0.0240965	0.207056	0.116377	0.907354	0.984467
YOR392W	4.07648	0.445006	0.703992	0.632118	0.52731	0.851041
YAL039C	913.043	0.082753	0.190426	0.434569	0.663875	0.903303
YGR100W	1294.63	-0.160107	0.111273	-1.43886	0.15019	0.578227
YLR403W	1448.83	-0.0328969	0.124045	-0.265202	0.790854	0.94968
YOL118C	12.4511	-0.30681	0.45608	-0.672712	0.50113	0.841361
YDR286C	188.41	0.0850352	0.178294	0.476939	0.633405	0.886186
YHR141C	6252.31	0.477707	0.24424	1.9559	0.0504774	0.431194
YPL128C	722.688	-0.0251598	0.154859	-0.162469	0.870937	0.970073
YJL091C	790.183	0.479648	0.220654	2.17376	0.0297231	0.382019
YBR191W	7722.52	0.430626	0.20826	2.06773	0.0386651	0.40633
YDR380W	5269.69	-0.716421	0.423876	-1.69017	0.0909961	0.500173
YGR191W	2205.98	-0.0291217	0.14455	-0.201465	0.840335	0.965453
YGR047C	974.983	-0.135628	0.128586	-1.05477	0.291531	0.710805
YDR485C	994.181	-0.110725	0.103001	-1.07499	0.282378	0.70115
YPL239W	925.706	0.236224	0.182442	1.29479	0.195393	0.624803
YPR183W	2418.28	0.0109327	0.157338	0.0694851	0.944603	0.988252
YOR206W	2034.32	0.414509	0.251507	1.6481	0.0993327	0.517708
YEL049W	21.3978	-1.00919	0.369256	-2.73303	0.00627554	0.29102
YOR391C	20.9828	-0.775799	0.646375	-1.20023	0.23005	0.647564
YDR525W-A	295.369	-0.100984	0.191394	-0.527622	0.597762	0.872052
YBR089W	2.46692	1.50553	1.0293	1.46268	0.143555	NA
YLR075W	21738.8	0.287677	0.209815	1.3711	0.170345	0.603413
YBR054W	2635.89	-0.695254	0.828042	-0.839636	0.401113	0.784836
YLR020C	797.156	0.224504	0.139802	1.60587	0.108302	0.524556
YNL217W	1264.11	-0.131009	0.173072	-0.756966	0.44907	0.811443
YLR404W	317.391	0.0114924	0.139863	0.0821685	0.934513	0.987126
YIL013C	357.745	-0.222172	0.22555	-0.985023	0.324613	0.735034
YPL206C	1420.61	-0.140066	0.120964	-1.15792	0.246899	0.662691
YDL060W	1343.07	0.28196	0.218663	1.28947	0.197233	0.627542
YBR293W	807.698	-0.229037	0.144406	-1.58606	0.112725	0.529927
YNR052C	1123.78	0.021608	0.136364	0.158458	0.874096	0.972702
YHR032W	1101.56	0.0726676	0.144417	0.503177	0.61484	0.878637
YEL032W	1491.56	-0.118213	0.195008	-0.606196	0.544384	0.855522
YOL076W	609.387	0.291191	0.237393	1.22662	0.219966	0.638209
YDR136C	2.5078	-0.216858	0.960688	-0.225732	0.82141	NA
YHR203C	9218.34	0.384576	0.161948	2.37469	0.0175639	0.343433
YML112W	454.525	-0.0519089	0.147054	-0.352993	0.724094	0.922225
YLR154W-C	9.26977	-0.596412	0.489824	-1.2176	0.223375	0.641387
YGL241W	777.993	0.162005	0.176693	0.916873	0.359209	0.760216
YDL071C	11.4171	-0.396184	0.446775	-0.886766	0.375205	0.768704
YPR176C	738.484	-0.11083	0.100897	-1.09845	0.27201	0.694819
YDR057W	788.366	0.0839864	0.118033	0.711548	0.476745	0.825608
YJL036W	1080.01	-0.00136818	0.101221	-0.0135168	0.989215	0.997621
YER009W	3657.18	0.223928	0.0830484	2.69635	0.00701043	0.29102
YLR115W	826.294	0.0421826	0.115494	0.365236	0.714935	0.919591
YGL114W	1612.75	-0.200826	0.165142	-1.21608	0.223955	0.642144
YER167W	945.737	0.0310577	0.143258	0.216795	0.828368	0.96175
YMR104C	1804.85	-0.213629	0.350232	-0.609965	0.541885	0.854258
YER185W	80.6436	0.0493834	0.192758	0.256194	0.797801	0.952426
YDL195W	5048.04	-0.0769626	0.157375	-0.489039	0.624814	0.882164
YNL199C	1041.34	0.0739493	0.11238	0.658029	0.510519	0.843366
YCR026C	1668.66	-0.178548	0.0850221	-2.10002	0.0357268	0.40138
YBL052C	1031.85	0.143485	0.145463	0.986402	0.323936	0.735034
YBR076W	8.87473	-0.224541	0.492034	-0.456353	0.648136	0.894993
YNL317W	486.704	-0.0276977	0.110752	-0.250088	0.80252	0.952426
YLL019C	2251.65	-0.27405	0.141241	-1.9403	0.0523431	0.434096
YOR156C	415.502	-0.134794	0.126575	-1.06494	0.286904	0.705167
YHR052W	984.226	0.55193	0.302498	1.82457	0.0680654	0.472349
YKR026C	774.759	0.240638	0.156616	1.53649	0.124419	0.539989
YJR043C	477.443	-0.0275942	0.225199	-0.122533	0.902477	0.983451
YJR012C	291.801	0.0270669	0.135028	0.200455	0.841125	0.965453
YKL060C	100903	-0.241919	0.215312	-1.12357	0.261194	0.680217
YCR044C	767.411	0.105364	0.132215	0.796911	0.425503	0.794785
YKL035W	11911.1	-0.402332	0.319835	-1.25793	0.208415	0.631188
YLR264C-A	2.50838	0.345644	0.964293	0.358443	0.720011	NA
YNL073W	2370.22	0.303105	0.194785	1.5561	0.119685	0.533257
YMR280C	697.894	-0.14662	0.477173	-0.307269	0.758639	0.939583
YFL020C	49.4994	-0.344412	0.25824	-1.33369	0.182306	0.61195
YNL328C	58.7503	-0.312413	0.234841	-1.33032	0.183414	0.61195
YJL014W	3299.89	0.0551079	0.081576	0.67554	0.499332	0.841066
YMR031C	6129.09	-0.350839	0.189192	-1.85441	0.06368	0.464519
YOR174W	609.711	0.0555363	0.111616	0.497566	0.61879	0.880086
YPR149W	8263.98	-0.384787	0.243669	-1.57914	0.114304	0.529927
YNL015W	3179.77	-0.294011	0.187404	-1.56886	0.116681	0.531219
YCR084C	3900.74	-0.0991336	0.120551	-0.82234	0.410883	0.788955
YHR178W	538.158	-0.176505	0.140379	-1.25735	0.208629	0.631188
YDR260C	384.588	0.00663782	0.156063	0.0425331	0.966074	0.993884
YLR283W	449.488	0.0770368	0.163505	0.47116	0.637526	0.888464
YPL170W	571.516	-0.152936	0.137737	-1.11035	0.266848	0.689528
YPR001W	92.8112	-0.361443	0.281966	-1.28187	0.199888	0.6285
YDR204W	864.435	-0.255523	0.184074	-1.38815	0.165091	0.598392
YBR085C-A	1723.73	0.0570966	0.252834	0.225827	0.821336	0.959942
YDR251W	2762.08	-0.0668678	0.153025	-0.436973	0.662131	0.90201
YNL048W	1141.4	0.0730538	0.107257	0.681107	0.495804	0.838524
YML057C-A	2.20635	-1.0443	1.20992	-0.86312	0.388071	NA
YOR074C	932.041	-0.11375	0.185575	-0.61296	0.539903	0.854005
YPL028W	4201.67	-0.14385	0.157193	-0.915113	0.360132	0.760848
YJR152W	12055	-0.801578	1.12426	-0.71298	0.475858	0.825184
YKL025C	1240.68	-0.0825496	0.0958518	-0.861222	0.389116	0.77683
YAR008W	368.115	-0.0451434	0.307194	-0.146954	0.883168	0.976501
YOR003W	713.003	-0.567644	0.330406	-1.71802	0.0857928	0.496088
YOL097C	2379.45	0.242524	0.105474	2.29938	0.0214834	0.353236
YOR110W	754.433	-0.0432554	0.105846	-0.408663	0.682787	0.909537
YDR407C	1088.16	0.287665	0.150484	1.9116	0.0559274	0.447199
YNR020C	339.562	0.308541	0.215318	1.43296	0.15187	0.580359
YBR258C	133.066	0.3027	0.232069	1.30435	0.192113	0.622593
YNL146W	33.5643	0.25077	0.454741	0.551457	0.581321	0.86464
YFR019W	1180.72	-0.0107925	0.190377	-0.0566903	0.954792	0.990229
YLR262C-A	1495.33	0.359554	0.231215	1.55506	0.119931	0.533257
YBR223C	377.106	-0.176447	0.129815	-1.35922	0.174076	0.607668
YNL241C	5648.17	-0.70675	0.232389	-3.04124	0.00235606	0.218651
YJL154C	1762.97	-0.0292346	0.132233	-0.221084	0.825027	0.960614
YDR091C	2121.37	0.435083	0.214926	2.02434	0.0429351	0.416566
YJL123C	2238.74	-0.0668411	0.0803439	-0.831937	0.405445	0.788249
YHR066W	477.031	0.500543	0.351555	1.4238	0.154506	0.582047
YPL047W	287.067	-0.170105	0.185357	-0.917716	0.358768	0.760088
YER086W	5255.39	-0.22461	0.28215	-0.796065	0.425994	0.795215
YLR287C-A	6216.77	0.307465	0.179293	1.71487	0.0863687	0.496305
RPR1	31.0415	0.0547418	0.333833	0.163979	0.869747	0.96987
YBR176W	334.509	0.300016	0.154384	1.94331	0.0519782	0.434028
YDR207C	687.142	0.138102	0.108487	1.27298	0.203024	0.6285
YKL125W	516.066	-0.103974	0.242176	-0.429331	0.667683	0.905669
YDR373W	926.708	0.0784638	0.0952905	0.823416	0.410271	0.788955
YGL238W	1973.71	0.271742	0.21743	1.24979	0.211375	0.632849
YLR190W	1824.86	-0.150776	0.0788413	-1.9124	0.0558252	0.446969
YNL128W	99.0417	-0.162625	0.260402	-0.624514	0.53229	0.852139
YLR312C	929.089	-0.282831	0.179006	-1.58001	0.114104	0.529927
YKL191W	1138.33	0.199676	0.124531	1.60342	0.108842	0.524556
YNR006W	1355.5	-0.100547	0.0902602	-1.11397	0.265291	0.686963
YHR120W	515.9	0.187635	0.147841	1.26917	0.204381	0.6285
YAR050W	191.415	-0.445381	0.248581	-1.79169	0.0731819	0.481909
YOL137W	582.167	0.218446	0.148662	1.46941	0.141721	0.568471
YDR530C	953.51	-0.368728	0.13535	-2.72425	0.00644468	0.29102
YER111C	587.184	0.167784	0.214659	0.78163	0.434432	0.801634
YER144C	991.472	-0.118928	0.0798303	-1.48977	0.136286	0.556934
YOL039W	4649.04	0.43837	0.188618	2.32411	0.0201195	0.352479
YIL083C	960.376	-0.107409	0.0886874	-1.2111	0.225857	0.643962
YHL011C	2013.73	0.307035	0.113848	2.69689	0.00699909	0.29102
YGR184C	1879.68	0.0371745	0.171476	0.216791	0.828371	0.96175
YMR303C	100.871	0.639772	0.412879	1.54954	0.121252	0.535335
YDR307W	974.606	0.00334043	0.199483	0.0167454	0.98664	0.997463
YDR411C	1570.37	-0.107575	0.139211	-0.772743	0.439675	0.805957
YBR205W	1417.58	0.243618	0.154277	1.5791	0.114314	0.529927
YOR321W	952.748	0.0749625	0.123289	0.608025	0.543171	0.854516
YMR186W	29933.3	0.410222	0.375348	1.09291	0.274433	0.696434
YMR278W	1058.1	-0.271158	0.167363	-1.62018	0.105194	0.522399
YLR136C	282.873	-0.927354	0.385338	-2.4066	0.0161019	0.342884
YMR207C	832.953	-0.0242836	0.160445	-0.151351	0.879699	0.976359
YML015C	594.348	0.115344	0.120965	0.953533	0.34032	0.746963
YOR197W	2460.34	-0.0539838	0.0893472	-0.604203	0.545709	0.855811
YKR089C	2743.14	-0.182256	0.16709	-1.09076	0.275377	0.696434
YDL041W	1.65306	-1.04643	1.33109	-0.786147	0.431782	NA
YKR072C	1000.87	0.0555819	0.142543	0.389929	0.696589	0.913345
YDL014W	5129.43	0.348066	0.187585	1.85551	0.063523	0.464084
YER079W	1293.76	-0.461873	0.260849	-1.77066	0.0766181	0.488191
YER024W	969.932	-0.580207	0.206612	-2.80819	0.00498208	0.289946
YOR230W	9647.89	-0.436951	0.237653	-1.83861	0.0659722	0.469958
YGR234W	6649.37	0.256257	0.240622	1.06498	0.286887	0.705167
YMR178W	1241.41	-0.14372	0.111141	-1.29313	0.195965	0.625138
YPR037C	1085.98	-0.22388	0.186101	-1.203	0.228974	0.647564
YEL068C	312.212	-0.198224	0.222666	-0.890228	0.373344	0.767485
YNL090W	520.325	0.295689	0.146932	2.01242	0.0441757	0.421225
YOR307C	856.829	0.198159	0.110288	1.79674	0.0723771	0.481902
YMR225C	568.65	0.228067	0.236241	0.965402	0.334344	0.744031
YBR095C	609.858	0.0558418	0.123965	0.450464	0.652376	0.896876
YDR036C	977.887	0.328838	0.147034	2.23648	0.0253204	0.366454
YGR043C	362.477	-0.417252	0.183403	-2.27505	0.0229029	0.355869
YPL223C	151.789	-1.49059	0.464321	-3.21026	0.00132615	0.152457
YPL272C	307.814	0.106431	0.166355	0.639785	0.522312	0.84956
YPR002C-A	80.7335	0.251407	0.284334	0.884197	0.37659	0.770505
YOL002C	1401.59	0.00339408	0.184243	0.0184217	0.985302	0.99707
YFL005W	1997.04	0.0224832	0.114349	0.19662	0.844125	0.966131
YCR010C	21.1442	0.0489273	0.357729	0.136772	0.891211	0.979465
YMR152W	1612.03	-0.0779745	0.1172	-0.665314	0.50585	0.842576
YDR154C	6486.5	-0.0393254	0.163269	-0.240863	0.809662	0.955689
YMR125W	2028.27	0.463447	0.192428	2.40842	0.0160219	0.342884
YJR031C	957.025	0.0286107	0.204945	0.139602	0.888974	0.978935
YCL026C-A	19.7442	-0.828703	0.406067	-2.0408	0.0412704	0.41607
YCL026C-B	376.475	-0.348781	0.240277	-1.45158	0.14662	0.57356
YGR118W	6041.8	0.267483	0.174296	1.53465	0.124871	0.539989
YJL055W	2677	-0.144251	0.129826	-1.11111	0.26652	0.689264
YPR102C	6543.14	0.426407	0.21446	1.98828	0.0467807	0.426295
YNL334C	224.998	-0.311417	0.21522	-1.44697	0.147905	0.574386
YGL123W	20339.6	0.361104	0.197785	1.82574	0.0678896	0.472349
YPL064C	636.346	-0.0600469	0.0894933	-0.670966	0.502242	0.841361
YPL086C	1107.06	0.326241	0.136377	2.39219	0.016748	0.342884
Q0250	3.17224	-0.0533058	0.917656	-0.0580891	0.953678	NA
YPR153W	135.505	-0.270795	0.156376	-1.73169	0.083328	0.493656
YMR042W	187.518	-0.027952	0.203583	-0.1373	0.890794	0.979465
YLL003W	937.017	-0.0431411	0.140486	-0.307085	0.758778	0.939583
YER042W	1589	-1.65156	0.911423	-1.81207	0.0699761	0.475013
YDR109C	643.579	-0.108951	0.124355	-0.876134	0.380957	0.773838
YDR221W	1088.37	-0.0863106	0.0958487	-0.900488	0.367861	0.765415
YLR109W	6345.42	-0.0466181	0.263074	-0.177205	0.859347	0.967838
YKR009C	366.959	-0.480522	0.187873	-2.5577	0.0105366	0.309967
YMR078C	743.278	0.179635	0.190405	0.943438	0.345457	0.751739
YLR094C	749.367	0.135254	0.122589	1.10332	0.26989	0.692516
YBR037C	641.508	0.155781	0.240669	0.64728	0.517451	0.847105
YLR041W	21.5946	-0.110131	0.354216	-0.310916	0.755865	0.938465
YJR060W	905.253	-0.0283492	0.166058	-0.170718	0.864445	0.968541
YNL161W	1136.8	0.069902	0.0775452	0.901436	0.367356	0.76497
YIL146C	905.125	-0.435527	0.299847	-1.45249	0.146364	0.57356
YLR195C	1225.93	0.170709	0.10994	1.55275	0.120483	0.53354
YJL202C	1.35915	-1.43681	1.26483	-1.13597	0.255967	NA
YAL066W	2.53395	-3.33928	2.82091	-1.18376	0.236508	NA
YLR231C	1421.58	-0.35319	0.179975	-1.96244	0.0497116	0.427893
YKL016C	5236.63	-0.222233	0.11869	-1.87239	0.0611532	0.456951
YPL111W	4331.32	0.567341	0.89818	0.631656	0.527611	0.851041
YKL174C	1171.76	0.0689549	0.109086	0.632117	0.527311	0.851041
YKL121W	798.084	-0.210311	0.137236	-1.53247	0.125406	0.539989
YLR380W	1420.65	-0.0547517	0.130317	-0.420142	0.674381	0.907266
YOR142W-B	4631.43	0.0188329	0.219545	0.0857818	0.93164	0.986591
YMR012W	3599.92	0.500607	0.194635	2.57203	0.0101104	0.30938
YER093C	672.277	0.193382	0.140062	1.38069	0.167375	0.601982
YOR032W-A	19.2027	-1.46691	0.627527	-2.33761	0.0194074	0.347498
YDL201W	670.083	0.346204	0.210112	1.64771	0.0994121	0.517708
YDR468C	814.76	-0.117119	0.124947	-0.937353	0.348577	0.752693
snR73	1.91325	1.47969	1.05033	1.40879	0.158897	NA
snR72	4.42879	0.0578129	0.743166	0.0777927	0.937993	0.987334
snR71	1.42355	1.48953	1.35646	1.0981	0.27216	NA
snR70	31.6441	0.0127968	0.285081	0.0448882	0.964196	0.993042
snR77	7.54445	0.471433	0.620228	0.760096	0.447197	0.810564
snR76	26.0139	0.82951	0.474935	1.74658	0.0807108	0.492676
snR75	1.54522	1.69415	1.19803	1.41411	0.157328	NA
snR74	1.63176	1.14339	1.20298	0.950468	0.341874	NA
YFR003C	756.538	-0.196752	0.149855	-1.31295	0.189201	0.62012
snR78	1.35393	-0.269167	1.20386	-0.223586	0.82308	NA
YIL033C	3082.86	-0.141097	0.203017	-0.694999	0.487056	0.831735
YOR368W	394.143	0.0851919	0.166927	0.510354	0.609803	0.875589
YGR128C	944.711	0.497088	0.286727	1.73366	0.0829781	0.493349
YIL048W	1257.67	0.0768361	0.12797	0.600421	0.548226	0.855811
YLR337C	1543.38	-0.19092	0.161306	-1.18359	0.236576	0.654613
YOL056W	526.389	-0.0661639	0.156661	-0.422339	0.672777	0.907218
YFR052W	1969.31	0.0176583	0.100584	0.175558	0.860642	0.967912
YGR088W	2095.76	-0.645513	0.71024	-0.908866	0.363421	0.763451
YGL073W	1619.4	-0.13561	0.153092	-0.885805	0.375723	0.769247
YGL259W	48.2858	-0.211032	0.350731	-0.601691	0.54738	0.855811
YGR106C	3834.97	0.147603	0.144417	1.02206	0.306754	0.725281
YIL168W	294.425	-0.445431	0.543066	-0.820215	0.412094	0.788955
YGL086W	1014.75	0.099568	0.204741	0.486313	0.626745	0.882377
YAL044C	2787.39	-0.656224	0.344958	-1.90233	0.0571277	0.449714
YPR081C	837.534	-0.182356	0.150225	-1.21389	0.22479	0.64238
YDR284C	1440.13	-0.184687	0.11671	-1.58244	0.11355	0.529927
YJL097W	988.19	0.241001	0.119465	2.01734	0.0436597	0.419637
YOR121C	27.5819	-0.214618	0.585985	-0.366251	0.714178	0.919357
YOR048C	2032.96	0.101833	0.137397	0.741163	0.458595	0.818615
YHR143W	11507.6	-0.148001	0.320023	-0.462471	0.643744	0.892656
YMR315W-A	4.19908	-0.601228	0.710863	-0.845772	0.39768	0.783844
YLR157W-E	65.2919	-0.788718	0.29208	-2.70035	0.00692671	0.29102
YLR157W-D	129.145	-0.760384	0.311443	-2.44149	0.014627	0.333814
YCL004W	492.08	-0.0779389	0.122576	-0.635842	0.524879	0.850782
YPL042C	491.507	0.174347	0.163543	1.06606	0.286397	0.704764
YBL044W	3.40336	-0.31088	0.727988	-0.42704	0.66935	NA
YDR430C	994.868	0.313669	0.181616	1.7271	0.0841492	0.494904
YGL102C	7.73916	0.847308	0.886345	0.955957	0.339094	0.746805
YDR487C	2037.87	0.0181456	0.13239	0.137062	0.890982	0.979465
YPR185W	1182.51	-0.178615	0.139633	-1.27918	0.200834	0.6285
YER065C	1043.54	-0.401478	0.206342	-1.94569	0.0516916	0.434028
YLR077W	905.966	0.0937424	0.103359	0.906961	0.364427	0.763835
YBR056W	2703.85	-0.336838	0.216457	-1.55615	0.119673	0.533257
YLL020C	276.735	-0.119389	0.162911	-0.732849	0.463651	0.820948
YHR034C	334.56	0.0130739	0.145054	0.0901313	0.928183	0.986591
YBL019W	547.804	-0.2273	0.134249	-1.69312	0.0904333	0.499973
YOL070C	1274.95	-0.308432	0.139178	-2.21609	0.0266852	0.372376
YJL085W	584.829	0.0642745	0.107259	0.599246	0.549009	0.855811
YPL200W	5.03514	0.285987	0.781203	0.366086	0.714301	0.919357
YNR054C	453.735	0.273123	0.220048	1.2412	0.214533	0.633288
YDR130C	471.004	0.0851309	0.148063	0.574966	0.565314	0.860989
YIL015W	2680.22	0.0794953	0.217639	0.365263	0.714915	0.919591
YEL030W	315.741	-0.517751	0.188769	-2.74278	0.00609217	0.29102
YBR291C	1480.37	-0.0959103	1.25983	-0.0761299	0.939316	0.987334
YML114C	771.01	-0.0921904	0.0891758	-1.03381	0.301227	0.721737
YCR108C	1.67718	1.79691	1.49307	1.2035	0.228784	NA
YHR201C	1281.86	0.0165443	0.0942672	0.175504	0.860684	0.967912
YNL299W	370.632	0.0831976	0.304618	0.273121	0.78476	0.945975
YGR008C	4596.56	-0.391887	0.346375	-1.1314	0.257889	0.678168
YNL311C	907.787	-0.224933	0.438892	-0.512503	0.608299	0.874835
YPR170C	3.12415	-0.260963	0.84284	-0.309623	0.756847	NA
YJL030W	369.111	-0.0565243	0.11953	-0.472888	0.636293	0.887747
YGR248W	1269.57	-0.878452	0.668202	-1.31465	0.188627	0.619051
YBR074W	1180.73	0.12341	0.116335	1.06082	0.288772	0.707678
YOR150W	887.566	0.144253	0.131399	1.09782	0.272282	0.694819
YML036W	299.359	0.120201	0.125963	0.954257	0.339953	0.746963
YDL236W	2426.49	-0.148162	0.183249	-0.808529	0.418786	0.791202
YDL088C	1088.91	0.0147734	0.0875156	0.168809	0.865947	0.968541
YLR113W	3253.1	0.048601	0.137525	0.353397	0.723791	0.922225
YLR142W	8181.59	0.0561224	0.418476	0.134111	0.893315	0.980538
YLL058W	663.422	-0.469709	0.162104	-2.89757	0.00376062	0.257455
YDL197C	1107.54	-0.261724	0.134884	-1.94037	0.052335	0.434096
YER130C	1079.87	-0.0797135	0.199451	-0.399665	0.689404	0.911761
YER165W	9570.38	0.149861	0.105911	1.41496	0.157079	0.583944
YMR106C	297.093	0.0528938	0.133816	0.395272	0.692642	0.9122
YER187W	67.2336	0.362192	0.392765	0.922159	0.356446	0.759137
YGL112C	1668.21	-0.0361086	0.0770165	-0.468842	0.639183	0.889197
YMR244W	10.2825	0.229393	0.539287	0.425363	0.670572	0.905942
YDL008W	403.796	-0.022306	0.183291	-0.121697	0.903139	0.983451
YBL050W	2034.62	-0.106851	0.131954	-0.809761	0.418078	0.791202
YJR086W	470.354	0.277619	0.174091	1.59468	0.110784	0.526116
YJR014W	1730.65	0.106984	0.0827248	1.29325	0.195923	0.625138
YHR050W	1825.16	-0.0376312	0.134403	-0.279988	0.779487	0.943894
YPL018W	225.84	-0.17964	0.157037	-1.14394	0.252649	0.668428
YPL185W	13.1076	-0.410111	0.571699	-0.717354	0.473156	0.823954
YJR041C	758.307	0.503996	0.284612	1.77082	0.0765909	0.488191
YDL248W	750.409	-0.294701	0.172417	-1.70923	0.0874082	0.49753
YKR028W	1898.32	0.104972	0.0999091	1.05067	0.293408	0.713165
YKL037W	4.3774	-1.17661	0.735568	-1.59959	0.109689	0.525835
YMR286W	469.963	0.144103	0.178522	0.8072	0.419551	0.791202
YDL175C	426.799	-0.0158554	0.104845	-0.151228	0.879796	0.976359
YKL168C	732.355	-0.118547	0.137933	-0.859459	0.390087	0.777485
YFL026W	8905.87	-0.0245511	0.258501	-0.0949746	0.924335	0.986591
YDL102W	709.006	0.141446	0.133495	1.05956	0.289344	0.708307
YGL029W	362.373	0.420172	0.497318	0.844876	0.39818	0.783962
YDL128W	3440.75	-0.0886045	0.142955	-0.619808	0.535384	0.852987
YPL098C	627.298	0.0619796	0.167814	0.369335	0.711878	0.91818
YMR033W	1330.53	0.233305	0.132025	1.76713	0.0772062	0.488191
YPR003C	626.651	-0.0996071	0.100528	-0.990841	0.321763	0.734283
YGR262C	855.852	-0.098673	0.111908	-0.881736	0.37792	0.771929
YDR202C	877.806	-0.0945239	0.174103	-0.542918	0.587186	0.868581
YGR215W	562.475	0.28579	0.218312	1.30909	0.190504	0.622084
YDR253C	495.873	-2.99131	1.27744	-2.34165	0.0191986	0.347498
YCR082W	1039.95	0.205743	0.15031	1.36879	0.171064	0.603413
YOR001W	1722.23	0.206293	0.160476	1.2855	0.198617	0.628325
YKL088W	1004.56	0.0470763	0.0945124	0.498097	0.618416	0.879874
YEL075W-A	17.7915	-0.0493818	0.466624	-0.105828	0.915719	0.985934
YLR276C	1402.99	0.611903	0.220314	2.77741	0.00547939	0.29102
YDL222C	332.966	-0.898315	0.526703	-1.70554	0.0880932	0.498542
YNL140C	110.615	-0.15152	0.217268	-0.697389	0.485559	0.830256
YOL095C	323.916	-0.0807423	0.128722	-0.627261	0.530488	0.851984
YNR022C	636.434	0.274421	0.209729	1.30845	0.190719	0.622084
YDR409W	589.328	0.0337084	0.130662	0.257982	0.796421	0.952299
YBR221C	7437.23	-0.000559382	0.11897	-0.00470186	0.996248	0.998608
YEL018C-A	5.9319	-0.742006	0.680293	-1.09071	0.275398	0.696434
YAL005C	39314.7	0.189084	0.527711	0.358309	0.720112	0.920807
YPL158C	969.623	-0.095016	0.279348	-0.340135	0.733755	0.926425
tG(GCC)P2	10.9802	-0.0351722	0.559529	-0.0628603	0.949878	0.988952
YJL121C	1686.38	0.00221017	0.141193	0.0156535	0.987511	0.997463
YKL008C	1632.83	-0.174972	0.24165	-0.72407	0.469023	0.822302
YER158W-A	4.46593	-0.189835	0.642573	-0.29543	0.767665	0.940914
YBR103W	1010.78	-0.250831	0.135946	-1.84508	0.0650261	0.469436
YNR004W	72.4826	0.0510477	0.217932	0.234237	0.814801	0.957598
YPL032C	1997.84	-0.0306736	0.136757	-0.224293	0.822529	0.96009
YHR064C	6089.37	0.322523	0.116489	2.7687	0.00562809	0.29102
YKL197C	828.859	-0.254955	0.161571	-1.57797	0.114572	0.529927
YMR020W	851.643	-0.356412	0.138383	-2.57554	0.0100083	0.30938
YDR206W	1655.5	0.128266	0.148325	0.864767	0.387167	0.77528
YDR377W	2372.13	-0.0701769	0.186473	-0.376337	0.706666	0.916719
YIR007W	581.637	-0.315025	0.147729	-2.13245	0.0329695	0.39235
YPL045W	739.108	0.00954549	0.105786	0.0902337	0.928101	0.986591
YLR314C	2988.14	0.0417435	0.147831	0.282373	0.777657	0.943053
YFR020W	287.955	-0.418604	0.140924	-2.97042	0.00297394	0.230168
YNL126W	616.276	0.0882796	0.230871	0.382376	0.702183	0.915557
YOR327C	1176.09	-0.192502	0.124791	-1.5426	0.122927	0.537956
YOL139C	4686.2	0.293916	0.159849	1.8387	0.0659591	0.469958
YBR207W	1479.15	-0.0644164	0.103031	-0.625216	0.531829	0.852083
YNL269W	5.58677	0.0579496	0.667495	0.0868166	0.930817	0.986591
YDR532C	571.153	-0.0160557	0.183151	-0.0876638	0.930144	0.986591
YKL210W	6679.98	0.00759236	0.119421	0.0635766	0.949307	0.988952
YER146W	596.804	0.145172	0.168399	0.862071	0.388648	0.77683
YHR159W	390.48	-0.124483	0.134871	-0.922976	0.35602	0.759137
YPL132W	522.16	0.252871	0.190368	1.32832	0.184072	0.61195
YIL114C	367.976	-0.0170163	0.114992	-0.147978	0.88236	0.976359
YJL089W	36.9425	-0.490182	0.417221	-1.17487	0.240045	0.65705
YMR301C	1459.76	-0.758605	0.326782	-2.32144	0.0202632	0.352479
YJL217W	484.698	0.127207	0.154271	0.824571	0.409615	0.788955
YBL029W	304.35	-0.0964949	0.379867	-0.254023	0.799478	0.952426
YMR188C	704.607	0.513442	0.212808	2.4127	0.0158348	0.342884
YGR154C	1030.24	-1.71502	0.814275	-2.1062	0.0351873	0.400057
snR191	5.70404	0.27031	0.632302	0.427501	0.669015	0.905836
snR190	3.70742	0.856775	0.771511	1.11052	0.266777	0.689528
YOR389W	479.212	-0.177842	0.118763	-1.49745	0.134275	0.553869
YLR130C	2592.33	-0.280153	0.256842	-1.09076	0.275378	0.696434
YER022W	791.935	0.0758895	0.137496	0.551941	0.580988	0.86464
YBR140C	1422.65	-0.0328844	0.236669	-0.138947	0.889492	0.978935
YKR070W	847.673	-0.0775703	0.155462	-0.498967	0.617802	0.879708
YGL262W	9.93473	-1.56718	0.714233	-2.19422	0.0282195	0.375836
[truncated: 4,344 more rows]
