# Supplementary material for: Cytosolic aggregation of mitochondrial proteins disrupts cellular homeostasis by stimulating the aggregation of other proteins
Source: bioRxiv preprint, doi:10.1101/2021.05.02.442342, version 2 (2021-07-09)
Supplement: Figure 2 - Source Data 2 [file 442342_file17.xlsx]

## Sheet: deseq.pam.0h
	baseMean	log2FoldChange	lfcSE	stat	pvalue	padj
YAL008W	617.088	0.0072469	0.127018	0.0570541	0.954502	0.999862
YBR255W	426.548	-0.0152125	0.098854	-0.153889	0.877697	0.999862
YGR164W	1.55975	0.539058	1.2902	0.41781	0.676086	NA
YGR131W	19.0701	-0.278416	0.382926	-0.727075	0.46718	0.999862
YNL003C	362.806	0.124817	0.0960294	1.29978	0.193675	0.999862
YBR135W	235.873	0.0382003	0.170005	0.224701	0.822212	0.999862
YBR160W	619.146	0.245886	0.0882185	2.78724	0.00531586	0.182618
YJL082W	830.928	-0.20573	0.134789	-1.52631	0.126932	0.999862
YJL142C	116.318	-0.0153647	0.181332	-0.0847324	0.932474	0.999862
YPL191C	130.472	0.00866994	0.243706	0.0355754	0.971621	0.999862
YGL215W	1149.84	-0.00992479	0.164362	-0.0603838	0.95185	0.999862
YKL074C	401.251	-0.0717722	0.0964449	-0.744178	0.456769	0.999862
YJL077C	1.9189	0.128096	1.05571	0.121336	0.903425	NA
YKL096W-A	16314	-0.0735458	0.14255	-0.515929	0.605904	0.999862
YIL124W	1311.28	0.232088	0.103766	2.23664	0.0253098	0.541757
YPL039W	263.812	-0.161838	0.132362	-1.22269	0.221446	0.999862
YNL170W	14.3446	0.239814	0.439114	0.546132	0.584975	0.999862
YGL141W	456.488	-0.0192645	0.142356	-0.135326	0.892354	0.999862
YJL179W	210.128	-0.0388895	0.124446	-0.312502	0.754659	0.999862
YDR316W-B	647.438	0.518205	0.39403	1.31514	0.188462	0.999862
YKL083W	6.80349	-0.451142	0.784236	-0.575263	0.565114	0.999862
YBR152W	166.927	-0.00796318	0.156856	-0.0507676	0.959511	0.999862
YKL029C	856.669	0.347297	0.205786	1.68766	0.0914763	0.999862
YPL166W	126.712	0.0473213	0.178822	0.264628	0.791296	0.999862
YKL052C	480.165	-0.0492608	0.100036	-0.492431	0.622415	0.999862
YHR025W	935.232	-0.0318722	0.109954	-0.289869	0.771916	0.999862
YOL034W	449.157	-0.0670113	0.136029	-0.492626	0.622277	0.999862
YBL008W	296.717	-0.0442083	0.132864	-0.332733	0.739336	0.999862
YIL062C	910.802	0.0594601	0.113114	0.525666	0.59912	0.999862
YOL116W	335.323	-0.0590718	0.112166	-0.526648	0.598438	0.999862
YDR196C	503.023	-0.0109309	0.101251	-0.107958	0.914029	0.999862
YNL255C	1665	-0.107597	0.142837	-0.753284	0.451279	0.999862
YNR032W	273.705	-0.010708	0.137902	-0.0776494	0.938107	0.999862
YNR045W	646.773	-0.0633476	0.0895235	-0.707609	0.479188	0.999862
YML105C	677.149	-0.102096	0.082055	-1.24424	0.213413	0.999862
YNL288W	522.769	0.0299091	0.129715	0.230576	0.817644	0.999862
YIL059C	128.255	-0.0897854	0.165787	-0.541572	0.588113	0.999862
YIL004C	300.242	-0.156729	0.162231	-0.966088	0.334	0.999862
YNR018W	1749.5	-0.333453	0.128382	-2.59735	0.00939461	0.289113
YPL144W	162.251	-0.0308323	0.199344	-0.154669	0.877082	0.999862
YFR047C	1132.58	-0.0905952	0.117479	-0.77116	0.440612	0.999862
YER087C-B	488.841	-0.0305496	0.117172	-0.260724	0.794306	0.999862
YHR078W	435.462	0.0177487	0.148211	0.119753	0.904679	0.999862
YJR115W	55.5636	0.0830924	0.312407	0.265975	0.790258	0.999862
YLR355C	9037.19	0.0566955	0.116359	0.487245	0.626085	0.999862
YGR099W	314.804	0.0752652	0.107399	0.700799	0.483429	0.999862
YLR300W	11296	0.0348726	0.0960757	0.36297	0.716627	0.999862
YCL028W	1090.28	-0.0532042	0.130519	-0.407634	0.683542	0.999862
YJR140C	337.29	-0.0389201	0.149458	-0.260408	0.794549	0.999862
YOR033C	422.096	-0.0142271	0.10353	-0.13742	0.890699	0.999862
YOR062C	165.515	-0.032817	0.149565	-0.219416	0.826326	0.999862
YBR043C	722.601	0.0187436	0.0820326	0.22849	0.819265	0.999862
YHR112C	416.166	0.0468304	0.11835	0.395693	0.692332	0.999862
YLR011W	172.924	0.237712	0.163068	1.45775	0.14491	0.999862
YIL044C	395.273	-0.194737	0.105944	-1.83811	0.0660464	0.874932
YNL197C	1160.65	-0.0199904	0.0885524	-0.225747	0.821398	0.999862
YKR103W	128.002	0.00923447	0.178566	0.0517145	0.958756	0.999862
YLR133W	638.967	0.0418276	0.125051	0.334484	0.738014	0.999862
YER121W	75.8499	-0.0721541	0.18721	-0.385418	0.699928	0.999862
YCR046C	699.263	0.191719	0.154242	1.24297	0.213877	0.999862
YNL144C	1195.06	-0.199183	0.0886836	-2.24599	0.0247044	0.53797
YKL204W	986.066	0.000929673	0.123514	0.00752687	0.993994	0.999862
YOR266W	398.348	0.0479068	0.0942377	0.508362	0.6112	0.999862
YDR393W	283.161	0.113133	0.110207	1.02656	0.304629	0.999862
YGL171W	371.681	0.0781077	0.12488	0.62546	0.531669	0.999862
YPR194C	464.6	-0.327763	0.254265	-1.28906	0.197377	0.999862
YGR019W	1164.38	-0.0284751	0.130129	-0.218821	0.826789	0.999862
YBL033C	1097.95	-0.0375953	0.147088	-0.255598	0.798262	0.999862
YJL188C	17.8705	-0.0583805	0.581618	-0.100376	0.920046	0.999862
YLL057C	19.702	0.454342	0.374097	1.2145	0.224556	0.999862
YPL060C-A	6.35418	3.22205	0.966226	3.33467	0.000854003	0.0454494
YBR296C	75.7349	0.0545589	0.293522	0.185877	0.852541	0.999862
YNL277W	39.9036	-0.00347905	0.305994	-0.0113697	0.990928	0.999862
YMR040W	121.347	0.0485961	0.177221	0.274211	0.783922	0.999862
YDR077W	41127.5	0.0388201	0.107131	0.36236	0.717083	0.999862
YMR266W	1198.18	-0.0117933	0.139495	-0.084543	0.932625	0.999862
YKR064W	385.68	0.104603	0.194633	0.537437	0.590966	0.999862
YPL089C	865.182	0.0745918	0.0858841	0.868518	0.385111	0.999862
YGR277C	364.617	0.0243049	0.11203	0.216949	0.828248	0.999862
YDL139C	102.118	0.090459	0.21287	0.424951	0.670873	0.999862
YDR246W	384.036	0.0811579	0.126742	0.640337	0.521954	0.999862
YOR288C	249.463	-0.191105	0.134953	-1.41609	0.156749	0.999862
YCR028C	397.363	-0.0275738	0.107897	-0.255557	0.798293	0.999862
YML054C	3510.82	-0.855798	0.144083	-5.93963	2.85665e-09	7.79217e-07
YLR179C	502.385	0.0505299	0.103996	0.485885	0.627049	0.999862
YOR141C	793.079	0.022072	0.0845885	0.260934	0.794144	0.999862
YPL280W	246.922	0.0540835	0.208787	0.259036	0.795607	0.999862
YBL106C	147.526	0.211219	0.1803	1.17149	0.241403	0.999862
YGL044C	293.495	0.0652103	0.12104	0.538749	0.59006	0.999862
YER107C	387.305	0.0548817	0.122071	0.449589	0.653007	0.999862
YBR038W	1267.36	0.517855	0.088007	5.88425	3.99864e-09	1.0433e-06
YER076W-A	2.2363	-0.264955	1.12214	-0.236115	0.813343	NA
YGR259C	6.95421	0.0897257	0.578286	0.155158	0.876697	0.999862
YEL047C	537.462	0.0545324	0.104738	0.520655	0.602607	0.999862
YPR016C	1330.56	-0.0220785	0.0882739	-0.250114	0.8025	0.999862
YOR208W	470.685	0.0746754	0.193543	0.385833	0.69962	0.999862
YDL055C	6094.71	-0.0691932	0.14109	-0.490419	0.623838	0.999862
YML009C	405.419	0.0583206	0.0945454	0.616853	0.537332	0.999862
YML072C	2105.31	-0.055961	0.107819	-0.519026	0.603742	0.999862
YDR142C	373.714	-0.0097468	0.111762	-0.0872102	0.930504	0.999862
YFL044C	558.452	-0.143365	0.122358	-1.17169	0.241323	0.999862
YEL011W	2958.28	-0.0948127	0.181155	-0.523378	0.600711	0.999862
YKL019W	633.778	-0.171069	0.116974	-1.46245	0.143617	0.999862
YJL130C	9855.34	0.119585	0.180351	0.663072	0.507285	0.999862
YBL085W	1200.19	-0.0131571	0.0721306	-0.182407	0.855264	0.999862
YBR116C	193.072	0.116817	0.215927	0.541001	0.588507	0.999862
YDR166C	450.906	-0.0381137	0.222974	-0.170933	0.864276	0.999862
YDR082W	303.433	-0.121403	0.124539	-0.974822	0.329649	0.999862
YDR348C	804.573	-0.0870079	0.075883	-1.14661	0.251544	0.999862
YKL182W	11495.4	-0.274002	0.122604	-2.23484	0.0254276	0.541757
YKL018C-A	177.746	0.00766282	0.135909	0.0563819	0.955038	0.999862
YPL027W	2.16695	-0.395723	1.07854	-0.366904	0.71369	NA
YKL135C	797.03	0.00122723	0.160007	0.00766983	0.99388	0.999862
YLR363C	129.181	-0.0771377	0.238839	-0.322969	0.746718	0.999862
YEL077W-A	6.28766	0.708541	1.33651	0.530144	0.596012	0.999862
YDR179C	79.5827	-0.133165	0.646287	-0.206045	0.836755	0.999862
YML089C	33.0622	-0.256495	0.284128	-0.902745	0.366661	0.999862
YLR431C	243.618	0.340698	0.122899	2.77218	0.00556829	0.187408
YKR046C	3889.92	-0.0346415	0.128678	-0.26921	0.787768	0.999862
YJR005W	721.611	-0.0103566	0.149304	-0.069366	0.944698	0.999862
YJL116C	978.526	-0.395603	0.187374	-2.1113	0.0347466	0.633782
YMR030W	256.308	-0.100086	0.191523	-0.522579	0.601267	0.999862
YER030W	770.061	-0.178433	0.148165	-1.20429	0.228479	0.999862
YIR026C	306.178	0.0663294	0.137353	0.482912	0.629159	0.999862
YJR072C	762.671	0.0506897	0.135094	0.375218	0.707498	0.999862
YDR515W	288.603	0.118789	0.156431	0.759368	0.447633	0.999862
YKR039W	1623.21	0.223395	0.11254	1.98504	0.0471404	0.756389
YGL003C	596.645	-0.0888805	0.109171	-0.814138	0.415566	0.999862
YPL009C	816.91	-0.117697	0.130565	-0.901447	0.367351	0.999862
YDR268W	266.332	0.268003	0.125808	2.13025	0.0331511	0.619885
YGL192W	5.76259	0.279804	0.754291	0.37095	0.710675	0.999862
YDL117W	557.016	0.127617	0.0901554	1.41552	0.156915	0.999862
YMR131C	1101.16	0.00826418	0.125094	0.066064	0.947327	0.999862
YMR293C	280.452	0.203969	0.114891	1.77533	0.0758441	0.932665
YJL214W	34.8564	0.581326	0.301101	1.93067	0.0535237	0.797012
YIL105C	731.878	0.0109481	0.118657	0.0922668	0.926486	0.999862
YML126C	3974.12	-0.0192842	0.067734	-0.284705	0.77587	0.999862
YLR189C	927.608	0.0847693	0.11204	0.756596	0.449292	0.999862
YIL150C	129.2	-0.0880487	0.139168	-0.632678	0.526944	0.999862
YLR349W	10.3564	0.315575	0.575976	0.547897	0.583763	0.999862
YGL250W	246.353	0.0587586	0.154676	0.379881	0.704034	0.999862
YBR212W	1607.97	0.0536642	0.0841732	0.637546	0.523769	0.999862
YJR109C	1215.61	0.212143	0.134061	1.58244	0.113549	0.999862
YLR254C	466.148	0.190019	0.10061	1.88867	0.0589356	0.833418
YGR085C	3119.97	-0.0494076	0.129261	-0.382231	0.70229	0.999862
YPL105C	1505.64	-0.0735604	0.0702697	-1.04683	0.295178	0.999862
YGR145W	518.472	0.0776162	0.139541	0.556227	0.578056	0.999862
YJR094C	42.8642	0.0936538	0.352097	0.265988	0.790248	0.999862
YKL177W	5.93572	-0.414423	0.654202	-0.633478	0.526421	0.999862
YGL154C	177.44	-0.0738944	0.135462	-0.545498	0.585411	0.999862
YBR129C	319.874	-0.123342	0.113742	-1.0844	0.278188	0.999862
tK(UUU)D	1.77533	0.748072	1.41397	0.529059	0.596765	NA
YMR322C	46.1695	2.44722	0.411399	5.94853	2.70555e-09	7.73144e-07
YKL099C	376.671	0.0211751	0.143548	0.147512	0.882728	0.999862
YDR315C	87.1953	-0.245893	0.29511	-0.833224	0.404719	0.999862
YLR394W	486.747	-0.124488	0.123104	-1.01124	0.311901	0.999862
YNL104C	5464.99	-0.0848826	0.110152	-0.770595	0.440947	0.999862
YNL151C	409.192	-0.0839102	0.107754	-0.778718	0.436146	0.999862
YNR066C	98.9074	0.295286	0.26689	1.1064	0.268554	0.999862
YLR220W	1051.52	0.0894352	0.0907719	0.985273	0.32449	0.999862
YHR006W	995.049	0.0121107	0.115963	0.104436	0.916823	0.999862
YMR232W	39.2852	0.366646	0.354309	1.03482	0.300753	0.999862
YNL083W	516.936	-0.144476	0.0997682	-1.44811	0.147585	0.999862
YGR038C-A	8.42329	6.55907	3.38822	1.93584	0.0528868	0.789488
YGR038C-B	1230.8	0.0456495	0.13276	0.34385	0.730959	0.999862
YMR238W	1136.17	0.195328	0.0816103	2.39342	0.0166919	0.43176
YER168C	387.241	0.0104711	0.116086	0.0902011	0.928127	0.999862
YPL265W	952.101	-0.14869	0.200122	-0.742998	0.457483	0.999862
YOR227W	1160.3	0.114674	0.137799	0.832177	0.405309	0.999862
YOR081C	673.124	0.121421	0.11687	1.03894	0.298831	0.999862
YEL026W	1059.95	0.00177848	0.117589	0.0151244	0.987933	0.999862
YGR050C	25.0914	-0.45089	0.31879	-1.41438	0.15725	0.999862
YDR021W	120.7	0.0266664	0.236652	0.112682	0.910283	0.999862
YGL063W	98.1479	-0.399341	0.183911	-2.17138	0.0299026	0.594479
YPL212C	700.093	-0.0530396	0.126642	-0.418815	0.675351	0.999862
YOL157C	130.57	-0.100446	0.151091	-0.664806	0.506174	0.999862
YPR095C	636.177	-0.112809	0.128842	-0.875563	0.381268	0.999862
YOR310C	2088.5	-0.00879297	0.104588	-0.0840724	0.932999	0.999862
YDR188W	2183.85	-0.0135649	0.0927698	-0.146221	0.883747	0.999862
YOL128C	84.654	-0.0438714	0.185943	-0.23594	0.813479	0.999862
YGL236C	435.516	0.0632873	0.127869	0.49494	0.620642	0.999862
YHR133C	326.494	-0.146314	0.111058	-1.31746	0.187684	0.999862
YDR017C	1015.3	-0.0285039	0.10183	-0.279916	0.779542	0.999862
YIL090W	633.467	-0.0515723	0.152542	-0.338087	0.735298	0.999862
YBR183W	969.727	-0.102989	0.139043	-0.740696	0.458877	0.999862
YOL048C	519.321	0.0524137	0.11915	0.439897	0.660012	0.999862
YML039W	3.03115	-4.9995	3.39588	-1.47222	0.14096	0.999862
YCR007C	84.4825	-0.0977362	0.215849	-0.452799	0.650693	0.999862
YDR540C	10.4045	1.08212	0.50537	2.14124	0.0322548	0.618407
YEL004W	164.81	-0.029563	0.297668	-0.0993152	0.920888	0.999862
YPR057W	437.657	-0.203621	0.131902	-1.54373	0.122654	0.999862
YLL032C	238.624	0.194849	0.169462	1.14981	0.250221	0.999862
YDR116C	698.309	0.101182	0.100682	1.00497	0.314913	0.999862
YPL119C-A	30.9619	-0.0355852	0.662612	-0.0537044	0.957171	0.999862
YDR299W	620.035	-0.0815867	0.153087	-0.532943	0.594073	0.999862
YLR030W	41.7428	0.738923	0.31179	2.36994	0.0177911	0.448589
YDR122W	1357.16	0.0806904	0.0951015	0.848466	0.396178	0.999862
YOL062C	796.436	-0.00482568	0.113973	-0.0423405	0.966227	0.999862
YNL234W	211.972	-0.0201505	0.127228	-0.15838	0.874157	0.999862
YLR467W	2801.24	0.120051	0.0709327	1.69246	0.0905575	0.999862
YJL194W	337.077	0.144472	0.137197	1.05302	0.292332	0.999862
YOL015W	74.2385	-0.267639	0.242829	-1.10217	0.270386	0.999862
YDL070W	2865.35	-0.215545	0.183622	-1.17385	0.240455	0.999862
YOR241W	542.47	0.0719021	0.0887721	0.809963	0.417961	0.999862
YLR056W	3268.03	0.220887	0.164777	1.34052	0.180075	0.999862
YMR054W	898.504	0.0958836	0.0838626	1.14334	0.252897	0.999862
YKL110C	555.974	-0.237369	0.0887859	-2.67349	0.0075066	0.235849
YPR070W	334.36	0.0920565	0.180448	0.510156	0.609942	0.999862
YLR204W	669.909	0.157994	0.148037	1.06726	0.285852	0.999862
YML097C	364.795	-0.210872	0.116667	-1.80746	0.0706903	0.905958
YKR007W	463.883	-0.0581394	0.126596	-0.45925	0.646055	0.999862
YDL096C	2.26655	-1.81245	1.16744	-1.55251	0.120541	NA
YHR193C	3799.93	-0.0694218	0.142618	-0.486769	0.626422	0.999862
YBL099W	11865.3	-0.389157	0.0782524	-4.9731	6.58892e-07	0.000104053
YJR035W	408.766	-0.0839807	0.122427	-0.685963	0.492736	0.999862
YOR126C	300.82	-0.0571134	0.118852	-0.480541	0.630843	0.999862
YMR023C	204.399	-0.15888	0.127279	-1.24828	0.211927	0.999862
YOR119C	909.429	-0.0583811	0.115337	-0.506179	0.612731	0.999862
YNL196C	5.04111	-0.311109	0.7557	-0.411683	0.680572	0.999862
YNL187W	128.462	0.132976	0.160162	0.830257	0.406393	0.999862
YMR141C	2.16456	0.392589	1.11144	0.353227	0.723918	NA
YLL014W	383.459	-0.0558569	0.177026	-0.315529	0.75236	0.999862
YCR061W	411.138	-0.0149553	0.168798	-0.0885988	0.929401	0.999862
YPR115W	1036.59	0.0184454	0.114734	0.160767	0.872277	0.999862
YHR088W	507.836	-0.046985	0.136035	-0.345389	0.729802	0.999862
YBR017C	647.421	0.106431	0.099205	1.07284	0.283341	0.999862
YPR162C	177.954	-0.138075	0.132549	-1.04169	0.297555	0.999862
YGR166W	339.435	0.129591	0.184078	0.703998	0.481434	0.999862
YDL161W	724.937	0.0815718	0.101419	0.804301	0.421223	0.999862
YKL050C	304.397	0.0584015	0.11507	0.507532	0.611782	0.999862
YJR055W	74.8921	0.104139	0.222516	0.468007	0.63978	0.999862
YGL099W	595.039	-0.129514	0.0934149	-1.38644	0.165614	0.999862
YFL030W	4449.65	-0.730383	0.113669	-6.42553	1.31407e-10	4.69819e-08
YIL119C	306.002	-0.19085	0.258586	-0.738054	0.460482	0.999862
YPL193W	329.389	0.0387678	0.112506	0.344586	0.730406	0.999862
YNL005C	1149.15	0.0729809	0.0749965	0.973125	0.330491	0.999862
YJL144W	95.4287	0.0510765	0.220466	0.231675	0.81679	0.999862
YBR012W-B	10.9078	1.55241	1.97951	0.784236	0.432902	0.999862
YLR379W	1.86823	0.462833	1.19149	0.38845	0.697683	NA
YJR139C	1930.72	-0.0554031	0.102964	-0.538084	0.590519	0.999862
YBR133C	554.623	0.117894	0.117702	1.00164	0.316519	0.999862
YBR162C	6300.03	-0.0592511	0.0782882	-0.756833	0.44915	0.999862
YNL331C	190.639	0.139546	0.123716	1.12796	0.259339	0.999862
YJL079C	7980.04	-0.0644668	0.116374	-0.553963	0.579604	0.999862
YGL019W	697.051	-0.123098	0.131216	-0.93813	0.348177	0.999862
YGR201C	298.544	0.00300173	0.157998	0.0189985	0.984842	0.999862
YNL172W	480.118	0.247986	0.12701	1.95249	0.0508795	0.776916
YNL058C	1008.63	0.717156	0.13354	5.37036	7.85786e-08	1.47359e-05
YPL160W	1986.37	0.0182795	0.101533	0.180036	0.857124	0.999862
YNL023C	445.584	-0.0166048	0.105537	-0.157335	0.874981	0.999862
YDR214W	1183.11	0.0687022	0.148033	0.4641	0.642576	0.999862
YLR222C	694.196	0.0561147	0.148836	0.377023	0.706156	0.999862
YLR295C	2302.53	-0.202084	0.111612	-1.81059	0.0702037	0.905958
YER175W-A	2.60969	-0.0375436	1.27697	-0.0294005	0.976545	NA
YHR168W	284.278	0.135427	0.127523	1.06198	0.288244	0.999862
YOR064C	470.155	-0.387423	0.118325	-3.27424	0.00105947	0.0524097
YOR159C	204.609	-0.171417	0.148637	-1.15326	0.248805	0.999862
YOL081W	728.249	0.0439884	0.207379	0.212116	0.832017	0.999862
YOL036W	1237.03	-0.0353947	0.0853267	-0.414814	0.678278	0.999862
YGL148W	1363.12	-0.0497638	0.10988	-0.452893	0.650626	0.999862
YOR031W	216.899	0.433103	0.251704	1.72068	0.0853081	0.994046
YBR282W	424.31	0.176865	0.125553	1.40868	0.158929	0.999862
YDR194C	1607.51	0.069029	0.119344	0.578406	0.56299	0.999862
YOL114C	65.6661	0.41995	0.206026	2.03833	0.0415168	0.705786
YGR084C	752.236	0.11968	0.090059	1.32891	0.183878	0.999862
YNR030W	462.379	0.0105397	0.137463	0.0766731	0.938884	0.999862
YML007C-A	2.31079	-0.0662571	1.07349	-0.061721	0.950785	NA
YBR018C	40014	-0.215913	0.0856842	-2.51987	0.0117398	0.344863
YKL076C	64.7596	0.0670779	0.198497	0.337928	0.735417	0.999862
YDR466W	746.008	0.023446	0.0991226	0.236535	0.813018	0.999862
YFR045W	375.537	-0.0747618	0.0992039	-0.753617	0.451079	0.999862
YIL002C	495.624	0.022324	0.119288	0.187143	0.851548	0.999862
YGR159C	3996.25	-0.0489045	0.14987	-0.326312	0.744188	0.999862
YLR369W	593.136	0.0305706	0.083572	0.365799	0.714515	0.999862
YFR032C	24.5012	0.0879623	0.515393	0.17067	0.864483	0.999862
YNL118C	1305.67	0.0228213	0.11632	0.196193	0.844459	0.999862
YGL228W	1562.49	-0.0402138	0.0701508	-0.573248	0.566477	0.999862
YJR117W	1375.31	0.10484	0.131	0.800302	0.423536	0.999862
YBR196C-A	6.56129	-0.419206	0.73783	-0.56816	0.569926	0.999862
YBR196C-B	7.54146	-0.25339	0.63717	-0.39768	0.690866	0.999862
YIL030W-A	37.7007	-0.176104	0.259884	-0.677625	0.49801	0.999862
YLR357W	971.862	-0.0139963	0.0867667	-0.16131	0.871849	0.999862
YER127W	411.686	0.0746015	0.130072	0.573542	0.566278	0.999862
YBL015W	2901.07	-0.803928	0.19728	-4.07505	4.60045e-05	0.00378182
YLR017W	529.35	0.0724695	0.130772	0.554165	0.579466	0.999862
YHR110W	830.552	-0.0107301	0.11111	-0.0965717	0.923067	0.999862
YBR041W	768.356	0.0303934	0.135023	0.225098	0.821903	0.999862
YOR394W	15.3867	0.435882	0.453986	0.960122	0.336994	0.999862
YDL220C	175.185	0.0505926	0.162555	0.311234	0.755623	0.999862
YDL039C	232.531	0.0343979	0.256687	0.134007	0.893397	0.999862
YKL202W	7.61739	-0.0267665	0.636296	-0.0420661	0.966446	0.999862
YGR122C-A	6.41083	-0.367649	0.833915	-0.440871	0.659306	0.999862
YOR264W	444.582	-0.00813469	0.153343	-0.0530488	0.957693	0.999862
YNL042W-B	3.75383	0.423559	0.806952	0.524887	0.599662	0.999862
YBL029C-A	321.793	-0.1009	0.141464	-0.713257	0.475687	0.999862
YOR008W-B	13.1831	0.0493908	0.422354	0.116942	0.906906	0.999862
YOR366W	15.9808	-0.0530741	0.383784	-0.138292	0.89001	0.999862
YNL275W	267.303	0.0273948	0.136026	0.201394	0.84039	0.999862
YAR015W	782.861	0.122081	0.143906	0.848342	0.396248	0.999862
YOR384W	9.32699	-1.92501	0.582274	-3.30603	0.000946274	0.0498122
YLL051C	443.474	-0.151828	0.11487	-1.32173	0.186257	0.999862
YDR427W	814.555	-0.0633159	0.232632	-0.272172	0.785489	0.999862
YLR079W	1223.92	-0.0292619	0.144292	-0.202796	0.839295	0.999862
YLR408C	72.915	-0.00893289	0.185856	-0.0480635	0.961666	0.999862
YMR093W	616.046	-0.0263715	0.115117	-0.229084	0.818803	0.999862
YDR079W	340.854	0.0565503	0.119194	0.47444	0.635186	0.999862
YMR268C	162.391	-0.123453	0.183442	-0.672981	0.500959	0.999862
YML070W	1825.83	-0.0443253	0.104617	-0.423692	0.67179	0.999862
YHR175W-A	22.3686	-0.104	0.547087	-0.190098	0.849233	0.999862
YPR072W	763.427	0.013985	0.0994636	0.140604	0.888183	0.999862
YMR108W	4214.45	-0.0990281	0.11087	-0.893192	0.371754	0.999862
YCR091W	560.534	0.129886	0.130415	0.995946	0.319276	0.999862
YER062C	2143.98	0.108042	0.131487	0.821698	0.411249	0.999862
YDR244W	638.802	0.131435	0.0804487	1.63378	0.102305	0.999862
YER189W	104.012	0.232677	0.246062	0.945601	0.344352	0.999862
YDL137W	4081.54	-0.133114	0.0949163	-1.40244	0.160784	0.999862
YGR271W	498.632	0.0688303	0.164065	0.419531	0.674828	0.999862
YDR233C	3971.82	-0.0608961	0.0618817	-0.984072	0.32508	0.999862
YGR071C	260.172	-0.0824809	0.299363	-0.275522	0.782916	0.999862
YCR106W	87.3753	-0.737986	0.215501	-3.42451	0.000615919	0.0355397
YBL100C	3.95373	-1.20565	0.977155	-1.23383	0.217265	0.999862
YER109C	554.54	-0.0739394	0.119879	-0.616783	0.537378	0.999862
YDR489W	150.343	0.193092	0.162447	1.18864	0.234579	0.999862
YPR049C	376.644	0.0651571	0.159874	0.407552	0.683603	0.999862
YDL057W	197.788	0.178588	0.135109	1.32181	0.186231	0.999862
YGR257C	457.975	-0.00851785	0.117466	-0.0725134	0.942193	0.999862
YEL045C	9.31965	0.385888	0.584315	0.66041	0.508991	0.999862
YPL235W	937.226	0.00504586	0.0865601	0.0582932	0.953515	0.999862
YLR122C	28.1026	0.117551	0.374459	0.313923	0.75358	0.999862
YBL087C	1967.31	-0.0398761	0.127106	-0.313723	0.753731	0.999862
YJL132W	367.093	0.347677	0.116752	2.9779	0.0029023	0.116111
YGL190C	661.555	-0.0583914	0.173747	-0.336072	0.736817	0.999862
YBR110W	631.376	-0.13225	0.154323	-0.85697	0.391461	0.999862
YDR144C	362.576	-0.0245699	0.141684	-0.173414	0.862326	0.999862
YFL046W	312.46	-0.0264006	0.105223	-0.250902	0.80189	0.999862
YOR103C	242.023	-0.109605	0.311719	-0.351614	0.725127	0.999862
YKL137W	488.068	-0.0501514	0.115274	-0.435064	0.663516	0.999862
YDR447C	2477.2	-0.106346	0.112364	-0.94644	0.343924	0.999862
YGL009C	13330.8	-0.15889	0.153074	-1.038	0.29927	0.999862
YPR145W	3011.78	-0.162714	0.0974681	-1.66941	0.0950371	0.999862
YJL063C	901.463	0.0572083	0.126846	0.451007	0.651984	0.999862
YMR149W	1213.21	-0.0668782	0.0952125	-0.70241	0.482424	0.999862
YIR010W	592.002	-0.0675053	0.0984766	-0.685495	0.493031	0.999862
YDR331W	414.317	-0.0371254	0.12077	-0.307405	0.758535	0.999862
YJL114W	1.36799	0.74767	2.09853	0.356282	0.721629	NA
YKR044W	304.692	-0.149111	0.119953	-1.24308	0.21384	0.999862
YLR433C	502.529	0.0814681	0.0877571	0.928336	0.353233	0.999862
YMR068W	168.833	0.12973	0.155109	0.836383	0.40294	0.999862
YLR157C-B	5.45452	-1.3999	3.26423	-0.428862	0.668023	0.999862
YNL164C	231.539	-0.128339	0.131954	-0.972604	0.33075	0.999862
YER032W	724.868	0.149284	0.102511	1.45628	0.145315	0.999862
YJR070C	973.367	-0.0959154	0.133585	-0.718012	0.47275	0.999862
YGL005C	842.589	-0.304587	0.14808	-2.0569	0.0396956	0.683482
YHR043C	960.281	-0.0220449	0.0873431	-0.252395	0.800736	0.999862
YDL111C	457.035	0.00465323	0.0969128	0.0480146	0.961705	0.999862
YMR133W	4.64176	-0.279035	0.723952	-0.385434	0.699916	0.999862
YPL007C	265.083	-0.0701838	0.196468	-0.357227	0.720922	0.999862
YKL159C	107.185	0.045684	0.164324	0.278013	0.781003	0.999862
YDR507C	1227.92	-0.013396	0.107384	-0.124748	0.900723	0.999862
YLR138W	1061.07	0.117171	0.0797832	1.46862	0.141936	0.999862
YBR101C	863.101	-0.0619308	0.101294	-0.611399	0.540935	0.999862
YLR396C	310.289	0.0281029	0.151637	0.185331	0.85297	0.999862
YBR245C	759.139	0.0183041	0.0987334	0.185389	0.852924	0.999862
YJL216C	220.963	0.130586	0.117845	1.10811	0.267813	0.999862
YBR210W	205.71	0.148229	0.127311	1.1643	0.244301	0.999862
YPL103C	197.511	0.0879944	0.145019	0.60678	0.543997	0.999862
YIL103W	264.092	-0.0119806	0.141764	-0.0845105	0.932651	0.999862
YIL152W	204.256	-0.0626607	0.178492	-0.351056	0.725546	0.999862
YJR096W	475.883	0.113698	0.140072	0.811714	0.416956	0.999862
YAL010C	229.085	0.02041	0.127167	0.160497	0.872489	0.999862
YGR143W	2024.24	0.214021	0.0953155	2.2454	0.0247425	0.53797
YGR112W	482.148	0.102634	0.140216	0.731969	0.464187	0.999862
YLR256W	1288.59	-0.0618831	0.227227	-0.27234	0.78536	0.999862
YHR174W	16868.3	-0.0834374	0.163242	-0.511128	0.609261	0.999862
YOR012W	16.8223	-0.436722	0.427145	-1.02242	0.306581	0.999862
YIR001C	434.73	-0.0961132	0.113138	-0.849521	0.395592	0.999862
YDL213C	571.773	0.228926	0.197989	1.15626	0.247575	0.999862
YDR317W	7.74552	0.68077	0.688915	0.988178	0.323066	0.999862
YDR478W	79.2102	-0.00406071	0.21493	-0.0188932	0.984926	0.999862
YKL097C	2.75094	0.187069	1.15567	0.16187	0.871408	NA
YNL106C	370.462	0.0274012	0.154023	0.177904	0.858798	0.999862
YOR378W	5.30469	0.299655	0.83099	0.3606	0.718398	0.999862
YFR015C	2180.05	-0.00051792	0.178978	-0.00289376	0.997691	0.999862
YMR230W	1962.52	-0.0729123	0.0975868	-0.747153	0.454971	0.999862
YIL092W	148.16	-0.100989	0.150113	-0.672754	0.501104	0.999862
YAR009C	4494.87	0.131454	0.150716	0.8722	0.383099	0.999862
YLR321C	455.142	-0.0102986	0.09895	-0.104079	0.917107	0.999862
YBR004C	218.745	-0.092819	0.353826	-0.262329	0.793067	0.999862
YGR052W	143.511	-0.246983	0.215324	-1.14703	0.251371	0.999862
YJR161C	601.445	0.202281	0.109974	1.83934	0.0658649	0.874932
YOR278W	211.155	-0.087429	0.146938	-0.595006	0.551839	0.999862
YNL085W	858.717	-0.0749794	0.231886	-0.323346	0.746433	0.999862
YGL061C	158.793	-0.188852	0.174058	-1.085	0.277923	0.999862
YPL210C	1032.61	0.00926189	0.126965	0.0729483	0.941847	0.999862
YOR087W	751.763	-0.106619	0.0909589	-1.17217	0.241131	0.999862
YGL234W	1285.93	0.0803082	0.122479	0.655688	0.512025	0.999862
YOR347C	294.978	0.259608	0.110091	2.35813	0.018367	0.456938
YPR093C	165.416	0.0639846	0.2378	0.269069	0.787877	0.999862
YAL029C	801.128	0.125029	0.148196	0.843675	0.398851	0.999862
YOL155C	718.199	0.228072	0.209105	1.09071	0.275403	0.999862
YDR421W	324.238	-0.0472456	0.119403	-0.395682	0.692339	0.999862
YGR186W	1507.86	-0.0440263	0.100739	-0.437036	0.662086	0.999862
YDR294C	1165.63	0.0232947	0.0787664	0.295744	0.767426	0.999862
YHR135C	1554.6	0.0350791	0.087906	0.399053	0.689855	0.999862
YBR181C	4441.51	0.0180706	0.12341	0.146427	0.883584	0.999862
YOR078W	547.817	-0.101927	0.139678	-0.729725	0.465558	0.999862
YOR243C	759.39	0.0362569	0.0858797	0.422183	0.672892	0.999862
YMR165C	664.191	-0.028659	0.101414	-0.282595	0.777487	0.999862
YCR005C	2351.74	0.247749	0.36281	0.68286	0.494695	0.999862
YPR055W	346.243	0.0657163	0.240028	0.273785	0.784249	0.999862
YIL016W	379.583	0.00836822	0.156985	0.0533059	0.957488	0.999862
YLR032W	433.49	0.170998	0.116077	1.47314	0.140712	0.999862
YPR046W	66.9699	-0.283595	0.264602	-1.07178	0.283819	0.999862
YBR099C	8.01472	-0.145083	0.69823	-0.207786	0.835396	0.999862
YBL027W	5626.78	-0.106842	0.134079	-0.796857	0.425534	0.999862
YOL060C	1142.99	0.11615	0.0869109	1.33643	0.181409	0.999862
YOR382W	183.286	-0.339408	0.203121	-1.67096	0.0947289	0.999862
YNL232W	465.953	-0.0508806	0.144049	-0.353217	0.723926	0.999862
YDL076C	355.947	-0.0103057	0.105837	-0.0973737	0.92243	0.999862
YOR225W	1.23561	1.27091	1.55497	0.817317	0.413748	NA
YDR120C	623.007	0.0330035	0.12233	0.26979	0.787322	0.999862
YLR465C	21.3338	0.190365	0.40334	0.471972	0.636947	0.999862
YJL192C	639.82	0.057414	0.0935686	0.613604	0.539477	0.999862
YEL020C-B	3.70761	-0.107954	1.0233	-0.105495	0.915983	0.999862
YLR054C	21.3011	0.325785	0.382103	0.852611	0.393875	0.999862
YLR009W	966.12	0.00108291	0.10343	0.01047	0.991646	0.999862
YKL116C	492.003	0.0349939	0.0918023	0.381187	0.703064	0.999862
YOR292C	257.754	-0.152896	0.118804	-1.28696	0.198108	0.999862
YLR423C	198.193	0.0618823	0.135893	0.455376	0.648839	0.999862
YLR105C	373.857	0.0859967	0.107212	0.802121	0.422483	0.999862
YML091C	2681.79	-0.459047	0.210438	-2.18138	0.029155	0.589087
YHR191C	88.3666	0.0473924	0.211199	0.224396	0.822449	0.999862
YDL098C	112.196	0.0441408	0.158507	0.278478	0.780646	0.999862
YLR202C	46.7481	0.115282	0.220366	0.523141	0.600876	0.999862
YKR005C	114.862	-0.189209	0.201959	-0.936869	0.348826	0.999862
YMR143W	3107.35	-0.167022	0.11799	-1.41556	0.156904	0.999862
YCR063W	49.469	0.158218	0.229052	0.690751	0.489722	0.999862
YNL189W	1685.9	0.0386919	0.064453	0.600311	0.548299	0.999862
YFR024C-A	1327.74	0.0454944	0.0959986	0.473907	0.635566	0.999862
YCL047C	188.117	0.0295902	0.133271	0.22203	0.82429	0.999862
YGL122C	1433.18	0.00245027	0.107267	0.0228427	0.981776	0.999862
YDL018C	255.332	-0.0143241	0.13929	-0.102837	0.918092	0.999862
YOR120W	13222.8	-0.120526	0.125716	-0.958717	0.337701	0.999862
YPR160W	5504.75	-0.111346	0.209345	-0.531875	0.594813	0.999862
YBL060W	302.815	-0.0527695	0.135862	-0.388405	0.697717	0.999862
YDR065W	108.665	-0.0907446	0.201419	-0.450528	0.65233	0.999862
YBR019C	79875	-0.162863	0.0502316	-3.24224	0.00118596	0.0574542
YKL056C	5182.88	-0.152965	0.099559	-1.53642	0.124435	0.999862
YKL065W-A	59.3441	-0.623167	0.227496	-2.73924	0.00615811	0.20417
YGR160W	7.40586	0.072314	0.824536	0.0877026	0.930113	0.999862
YPL068C	252.222	0.113182	0.1501	0.754041	0.450824	0.999862
YJR057W	286.139	-0.0776899	0.125966	-0.616754	0.537397	0.999862
YGL211W	478.68	0.0569159	0.114167	0.49853	0.61811	0.999862
YFL032W	2.49854	0.0839827	1.05596	0.0795318	0.93661	NA
YPL195W	695.961	-0.0720263	0.187953	-0.383215	0.70156	0.999862
YCL044C	355.626	0.0882075	0.1542	0.572032	0.5673	0.999862
YAL059W	254.265	0.107728	0.152939	0.704384	0.481194	0.999862
YNL007C	2402.12	0.0300434	0.089858	0.334344	0.73812	0.999862
YPL148C	129.107	-0.02012	0.165491	-0.121578	0.903233	0.999862
YJR137C	869.353	0.0276833	0.156336	0.177076	0.859449	0.999862
YMR021C	266.692	0.0355107	0.114603	0.309858	0.756669	0.999862
YMR074C	527.652	0.00939345	0.119885	0.078354	0.937546	0.999862
YGR203W	165.993	0.225372	0.180147	1.25104	0.210919	0.999862
YJR039W	325.498	0.0726829	0.164678	0.441364	0.658949	0.999862
YDL158C	20.5059	-0.560105	0.529548	-1.0577	0.290191	0.999862
YOR104W	301.842	0.229944	0.123748	1.85815	0.0631471	0.855408
YFL009W	656.364	-0.0566429	0.108658	-0.521294	0.602162	0.999862
YLR297W	145.657	0.0974233	0.18889	0.515766	0.606018	0.999862
YLR279W	1.15365	0.650308	1.58837	0.409419	0.682232	NA
YDR216W	2311.63	-0.0556055	0.19415	-0.286405	0.774568	0.999862
YIL120W	163.203	0.0697086	0.143821	0.48469	0.627896	0.999862
YBR030W	408.013	-0.114411	0.101966	-1.12206	0.261839	0.999862
YPL162C	257.674	-0.0586438	0.146277	-0.40091	0.688486	0.999862
YGR095C	307.761	-0.0950418	0.120136	-0.791118	0.428875	0.999862
YCL027W	70.9091	0.27273	0.375136	0.727016	0.467216	0.999862
snR3	2.13111	0.310354	1.13186	0.274198	0.783932	NA
snR5	14.7503	-0.0966941	0.471008	-0.205292	0.837344	0.999862
snR4	38.0658	0.492154	0.264764	1.85884	0.0630498	0.855408
snR9	20.7649	0.343245	0.422134	0.813119	0.41615	0.999862
snR8	33.7616	0.0205562	0.345468	0.0595024	0.952552	0.999862
YHR029C	299.54	-0.170565	0.10652	-1.60124	0.109323	0.999862
YAL033W	179.137	-0.226586	0.162956	-1.39048	0.164385	0.999862
YNL130C	631.331	-0.00912379	0.120622	-0.0756398	0.939706	0.999862
YNR036C	1350.51	0.0924253	0.140042	0.659983	0.509265	0.999862
YNR049C	290.695	-0.0918991	0.158398	-0.580179	0.561794	0.999862
YDR192C	296.503	0.0193557	0.127532	0.151771	0.879368	0.999862
YOL112W	708.77	0.0979818	0.0840182	1.1662	0.243534	0.999862
YML109W	500.694	0.0223976	0.103972	0.215421	0.829439	0.999862
YOL083W	506.704	-0.0758753	0.0952736	-0.796393	0.425803	0.999862
YNL251C	717.989	-0.0112511	0.139216	-0.080818	0.935587	0.999862
YBR266C	1.48419	0.110798	1.53757	0.072061	0.942553	NA
YBL004W	579.008	-0.00451033	0.166311	-0.0271199	0.978364	0.999862
YER145C-A	2.23033	0.0850036	1.16494	0.0729682	0.941831	NA
YBR164C	491.796	-0.0270301	0.100655	-0.268541	0.788283	0.999862
YHR074W	1268.34	0.0432514	0.0775122	0.557994	0.576848	0.999862
YDR464W	744.063	-0.0102551	0.0991815	-0.103397	0.917648	0.999862
YFR030W	666.01	-0.045507	0.142527	-0.319287	0.749509	0.999862
YJL146W	370.207	0.0486497	0.103769	0.468829	0.639192	0.999862
YKL078W	195.671	0.0898634	0.166545	0.539573	0.589491	0.999862
YIL055C	390.161	0.217255	0.104385	2.08128	0.037408	0.658316
YPL053C	1254.25	0.0384642	0.0914034	0.420819	0.673888	0.999862
YLR351C	823.855	0.120014	0.110225	1.08881	0.276237	0.999862
YEL009C-A	1.91595	-1.45352	1.21826	-1.19311	0.232828	NA
YJR111C	239.157	-0.00657199	0.115054	-0.0571208	0.954449	0.999862
YIL030C	966.484	-0.0225887	0.162314	-0.139166	0.889319	0.999862
YER125W	1566.73	-0.0269952	0.134586	-0.20058	0.841027	0.999862
YER152C	668.646	0.0846345	0.117466	0.720502	0.471216	0.999862
YLR015W	245.896	-0.129878	0.116663	-1.11328	0.26559	0.999862
YHR116W	187.454	0.221631	0.155492	1.42535	0.154055	0.999862
YPL259C	494.286	-0.0509799	0.131467	-0.387777	0.698181	0.999862
YOL100W	820.137	0.00220272	0.122147	0.0180334	0.985612	0.999862
YOR039W	522.826	-0.104036	0.099466	-1.04595	0.295586	0.999862
YDL037C	82.5134	0.0285391	0.374327	0.076241	0.939227	0.999862
YHL043W	2.20356	-0.807927	1.06396	-0.759361	0.447636	NA
YOR364W	4.80388	0.438489	0.673681	0.650886	0.51512	0.999862
YOR386W	367.231	0.246311	0.113137	2.17711	0.0294725	0.59152
YAR042W	901.121	0.133225	0.104079	1.28003	0.200534	0.999862
YPR198W	485.139	0.0920464	0.182937	0.503158	0.614853	0.999862
YHL038C	272.069	0.0649561	0.11543	0.562732	0.573617	0.999862
YLL053C	254.611	-1.70286	0.149862	-11.3629	6.39907e-30	1.28003e-26
YDR425W	294.609	0.0050228	0.214008	0.0234701	0.981275	0.999862
YOR331C	9.03903	-0.115811	1.06517	-0.108725	0.91342	0.999862
YML076C	450.277	-0.0187937	0.124683	-0.150732	0.880187	0.999862
YKR060W	153.608	-0.0865675	0.168838	-0.512727	0.608143	0.999862
YHR094C	5.84742	1.09364	0.654003	1.67222	0.0944813	0.999862
YER069W	2329.53	0.169817	0.122675	1.38428	0.166272	0.999862
YMR091C	626.976	-0.106448	0.0868735	-1.22532	0.220455	0.999862
YER012W	1181.68	-0.0510347	0.0904936	-0.563959	0.572782	0.999862
YHR098C	893.563	0.0033867	0.13518	0.0250533	0.980012	0.999862
YDL135C	479.541	0.0200867	0.093772	0.214208	0.830385	0.999862
YCR093W	969.518	0.0475828	0.199894	0.23804	0.81185	0.999862
YGL080W	354.329	-0.0926793	0.161076	-0.575376	0.565037	0.999862
YBR069C	3554.3	0.0937465	0.108863	0.86114	0.389161	0.999862
YGR077C	454.318	-0.0391343	0.118581	-0.33002	0.741385	0.999862
YDR040C	1090.42	0.00671379	0.209134	0.0321029	0.97439	0.999862
YPR012W	16.3424	-0.473259	0.525089	-0.901294	0.367432	0.999862
YGR255C	728.398	0.193076	0.102903	1.87629	0.0606155	0.838617
YDL051W	876.211	-0.0464245	0.126508	-0.366968	0.713643	0.999862
YBL102W	602.774	-0.130376	0.112248	-1.1615	0.24544	0.999862
tM(CAU)P	2.15733	1.1517	1.17899	0.976855	0.328641	NA
YPL237W	1958.06	0.0120591	0.0837288	0.144026	0.88548	0.999862
YLR120C	956.575	0.231822	0.135312	1.71324	0.0866682	0.997287
YCL001W-B	2.17346	1.27849	1.12418	1.13726	0.255428	NA
YCL001W-A	2.07509	1.95978	1.37519	1.4251	0.154128	NA
YNL068C	593.501	0.289855	0.0830958	3.4882	0.00048628	0.0294764
YBL002W	1846.99	-0.217509	0.116642	-1.86475	0.0622161	0.847565
YDR146C	1187.8	0.419215	0.107548	3.89793	9.70197e-05	0.00710019
YBR112C	1728.38	-0.0892233	0.106248	-0.839761	0.401042	0.999862
YBL081W	413.007	-0.0525048	0.100397	-0.522973	0.600993	0.999862
YFL040W	4.85561	-0.639784	0.700791	-0.912945	0.361271	0.999862
YNL326C	345.919	-0.088232	0.100699	-0.876192	0.380926	0.999862
YDR337W	668.998	0.0495855	0.0823535	0.602105	0.547104	0.999862
YJL061W	397.505	-0.135058	0.217939	-0.619705	0.535452	0.999862
YPR147C	440.84	0.0737675	0.0964243	0.76503	0.444254	0.999862
YKL131W	1.65897	0.41102	1.21839	0.337347	0.735856	NA
YDR441C	465.425	-0.0505847	0.139077	-0.363718	0.716069	0.999862
YPL094C	1276.56	-0.0673867	0.0950911	-0.708653	0.47854	0.999862
YOR101W	786.41	-0.241105	0.159415	-1.51243	0.130424	0.999862
YER020W	917.964	-0.0631609	0.15402	-0.410083	0.681745	0.999862
YDR231C	685.104	-0.145775	0.148938	-0.978764	0.327696	0.999862
YJL112W	1395.74	-0.190174	0.0697322	-2.72721	0.00638719	0.210602
YFL066C	222.431	0.402642	0.228829	1.75957	0.0784802	0.943807
YNL193W	428.627	0.0425928	0.133813	0.3183	0.750257	0.999862
YML058W	1260.74	0.0574982	0.145739	0.394528	0.693191	0.999862
YBR188C	191.461	-0.0315802	0.170688	-0.185018	0.853215	0.999862
YLR435W	230.946	-0.0466367	0.13633	-0.342085	0.732287	0.999862
YJR076C	1258.53	-0.00443565	0.0853569	-0.0519659	0.958556	0.999862
YKL157W	2630.44	-0.02755	0.114957	-0.239655	0.810598	0.999862
YBR003W	798.337	0.0935248	0.092113	1.01533	0.30995	0.999862
YPR129W	957.968	0.00400819	0.0762997	0.0525321	0.958105	0.999862
YDL113C	580.297	-0.0533487	0.117904	-0.452476	0.650926	0.999862
YMR135C	994.404	0.0531801	0.0837637	0.634882	0.525505	0.999862
YPL005W	279.928	0.0764201	0.124538	0.613627	0.539462	0.999862
YBR247C	477.142	0.00647949	0.128016	0.0506147	0.959633	0.999862
YLR185W	1837.38	0.0382625	0.136468	0.280376	0.779189	0.999862
YJL210W	618.848	-0.111341	0.109586	-1.01602	0.309622	0.999862
YLR398C	856.565	0.0893688	0.142081	0.628997	0.529351	0.999862
YIL154C	583.371	0.00408147	0.136805	0.0298342	0.976199	0.999862
YIL101C	1031.54	0.0595812	0.158343	0.376279	0.706709	0.999862
YKL004W	901.949	-0.0572733	0.102276	-0.559987	0.575488	0.999862
YPL154C	6454.38	-0.00292416	0.0965562	-0.0302845	0.97584	0.999862
YPL101W	513.588	-0.00384056	0.123112	-0.0311956	0.975114	0.999862
YLR258W	1546.49	0.119134	0.138493	0.860221	0.389667	0.999862
YBR178W	1.4366	0.308852	1.41343	0.218513	0.82703	NA
YJR098C	208.441	0.334674	0.118947	2.81364	0.00489842	0.172914
YHR176W	215.604	0.0567387	0.128731	0.440753	0.659392	0.999862
YJR018W	3.74808	0.184629	0.786897	0.23463	0.814496	0.999862
YDL244W	83.5849	0.27711	0.188765	1.46801	0.1421	0.999862
YDR319C	173.708	0.0401292	0.230872	0.173816	0.86201	0.999862
YKL095W	315.624	-0.0259561	0.113385	-0.228921	0.818931	0.999862
YIL094C	1163.12	-0.0483146	0.148816	-0.324661	0.745438	0.999862
YLR451W	513.506	-0.00674535	0.107616	-0.06268	0.950021	0.999862
YFR017C	648.633	-0.00716317	0.210112	-0.0340922	0.972804	0.999862
YLR342W-A	1.69197	-0.680551	1.45561	-0.467536	0.640116	NA
YIL076W	926.241	0.0489599	0.0848382	0.577098	0.563873	0.999862
YOL044W	313.367	0.066661	0.134643	0.495093	0.620534	0.999862
YLR323C	184.136	-0.0632711	0.171201	-0.369573	0.711701	0.999862
YOR085W	814.358	0.0476613	0.0941188	0.506395	0.612579	0.999862
YGR054W	1605.17	0.0880348	0.0658344	1.33721	0.181153	0.999862
YOR050C	1.39952	-0.40587	1.45265	-0.279399	0.779939	NA
YNL087W	957.473	-0.192066	0.103502	-1.85568	0.0634996	0.857545
YLR318W	115.557	-0.130718	0.282066	-0.46343	0.643056	0.999862
YBR278W	214.457	0.00915474	0.196643	0.0465552	0.962868	0.999862
YNL024C-A	207.31	-0.0253105	0.135666	-0.186564	0.852002	0.999862
YDR296W	945.827	0.150911	0.134555	1.12156	0.262052	0.999862
YGL232W	342.887	-0.0698418	0.140223	-0.498077	0.61843	0.999862
YPR091C	1097.29	-0.058975	0.118801	-0.496419	0.619599	0.999862
YGR141W	661.759	0.0521138	0.135321	0.385112	0.700154	0.999862
YAR030C	11.5645	-0.0244495	0.574546	-0.0425545	0.966057	0.999862
YGL111W	432.146	-0.0593485	0.110709	-0.536078	0.591904	0.999862
YHR137W	3290.1	0.192033	0.119107	1.61228	0.106901	0.999862
YFL011W	23.8206	-0.453405	0.351086	-1.29143	0.196553	0.999862
YMR198W	360.303	0.238612	0.105638	2.25878	0.0238971	0.531484
YCR003W	543.104	0.0209789	0.137438	0.152642	0.87868	0.999862
YMR316C-B	71.3914	-0.011377	0.214823	-0.05296	0.957764	0.999862
YMR316C-A	3.5925	0.357859	0.801836	0.4463	0.655381	0.999862
YDR342C	27436.4	-0.203122	0.107874	-1.88295	0.0597076	0.833418
YMR163C	274.781	-0.0173277	0.179697	-0.0964272	0.923181	0.999862
YGR294W	22.3448	0.240443	0.360438	0.667086	0.504717	0.999862
YEL008W	2.93923	0.216928	0.873094	0.248459	0.803779	NA
YLL067C	57.4505	-0.103257	1.06907	-0.0965854	0.923056	0.999862
YBR020W	72640.1	-0.182205	0.095199	-1.91394	0.0556281	0.811949
YLR418C	485.748	-0.0128872	0.0963213	-0.133794	0.893566	0.999862
YER059W	456.022	-0.0270777	0.103919	-0.260566	0.794427	0.999862
YNL076W	580.934	-0.0442337	0.0956159	-0.462619	0.643637	0.999862
YBL025W	109.304	-0.280515	0.184797	-1.51796	0.129024	0.999862
YOL066C	415.828	0.0168305	0.124035	0.135692	0.892065	0.999862
YDR126W	139.22	-0.23038	0.145379	-1.58469	0.113038	0.999862
YPL216W	226.908	-0.0141113	0.141834	-0.0994919	0.920748	0.999862
YOR223W	282.171	0.000259388	0.105022	0.00246983	0.998029	0.999862
YEL022W	518.563	-0.259431	0.206395	-1.25696	0.208768	0.999862
YHR072W	1415.1	0.107876	0.0854729	1.2621	0.206912	0.999862
YOL019W	1168.81	0.0330111	0.0873619	0.377866	0.70553	0.999862
YLR463C	48.0773	0.108923	0.265695	0.409957	0.681838	0.999862
YJL190C	2198.64	-0.0479479	0.129384	-0.370585	0.710947	0.999862
YMR218C	344.912	-0.048666	0.174993	-0.278102	0.780934	0.999862
YNL265C	512.324	-0.0725258	0.0884938	-0.819558	0.412468	0.999862
YNL230C	148.648	-0.010032	0.150138	-0.0668183	0.946726	0.999862
YLL049W	132.893	0.0246728	0.185545	0.132975	0.894213	0.999862
YHR211W	466.791	0.0809486	0.11815	0.685135	0.493259	0.999862
YPR166C	489.657	-0.0325726	0.123899	-0.262898	0.792629	0.999862
YJL042W	1411.4	-0.0693761	0.13395	-0.517927	0.604509	0.999862
YNL301C	689.096	0.0244648	0.165187	0.148104	0.882261	0.999862
YDR333C	627.281	-0.0400563	0.14072	-0.284652	0.775911	0.999862
YMR058W	3186.84	-1.00083	0.200309	-4.99642	5.84033e-07	9.47239e-05
YDR061W	650.064	0.122187	0.0898255	1.36027	0.173745	0.999862
YJR112W-A	234.883	-0.292372	0.132582	-2.20521	0.0274392	0.568811
YOR290C	1322.79	0.0134576	0.109064	0.123392	0.901797	0.999862
YKL114C	486.083	0.0525125	0.092452	0.567997	0.570037	0.999862
YML024W	4041.7	-0.0923678	0.112597	-0.820341	0.412022	0.999862
YML093W	849.319	-0.0532682	0.110348	-0.482731	0.629287	0.999862
YHR197W	332.798	0.00896818	0.226676	0.039564	0.968441	0.999862
YDR276C	1755	-0.025798	0.0994008	-0.259535	0.795223	0.999862
YLR200W	248.124	-0.159226	0.122741	-1.29725	0.194545	0.999862
YKR003W	429.979	0.125141	0.124285	1.00689	0.313988	0.999862
YLR107W	464.742	0.100693	0.152694	0.65944	0.509613	0.999862
YMR321C	29.8578	0.472492	0.972162	0.486022	0.626952	0.999862
YER175C	331.07	-0.14055	0.11623	-1.20924	0.226571	0.999862
YIR012W	707.482	0.134294	0.109328	1.22836	0.219311	0.999862
YDL183C	213.575	-0.0713461	0.134143	-0.531865	0.594819	0.999862
YPL278C	112.005	0.104981	0.201244	0.521661	0.601906	0.999862
YMR118C	78.3362	0.0128972	0.231617	0.0556834	0.955594	0.999862
YCL049C	1094.61	0.155721	0.118443	1.31474	0.188598	0.999862
YBL066C	1153.49	-0.26876	0.0938188	-2.86467	0.00417446	0.150006
YGL120C	1026.24	0.0178936	0.117196	0.152682	0.878649	0.999862
YGR271C-A	272.215	-0.158583	0.167371	-0.947494	0.343387	0.999862
YDR169C	988.923	0.0416414	0.0925655	0.449859	0.652812	0.999862
YOR057W	373.856	-0.0194136	0.123493	-0.157204	0.875084	0.999862
YLR410W-A	47.172	0.995157	3.18096	0.312848	0.754396	0.999862
YLR169W	2.25446	0.730617	1.05242	0.694224	0.487542	NA
YMR272C	2753.31	-0.135434	0.123137	-1.09986	0.271392	0.999862
YPR108W	1269.89	0.0258695	0.0701419	0.368817	0.712264	0.999862
YKL054C	1972.34	0.0829421	0.0791304	1.04817	0.294561	0.999862
YGR162W	2103.55	0.0113419	0.0949133	0.119497	0.904881	0.999862
YDL165W	353.973	-0.0519737	0.143188	-0.362975	0.716624	0.999862
YDR520C	293.917	0.202501	0.159281	1.27135	0.203605	0.999862
YKL023W	345.636	0.0666	0.13522	0.492531	0.622344	0.999862
YJR051W	981.781	-0.0189723	0.0702357	-0.270124	0.787065	0.999862
YNL009W	272.888	-0.0158717	0.136955	-0.11589	0.90774	0.999862
YFL034W	516.25	-0.115677	0.092111	-1.25584	0.209174	0.999862
YKL164C	3384.98	-0.0851576	0.213537	-0.398795	0.690044	0.999862
YJR135C	89.4745	-0.0272035	0.185933	-0.146308	0.883678	0.999862
YGL213C	490.245	-0.0916799	0.0969978	-0.945175	0.344569	0.999862
YMR076C	504.028	-0.0351665	0.203	-0.173234	0.862468	0.999862
YOR161W-B	2.0636	2.89295	1.54517	1.87225	0.0611718	NA
YNL027W	622.597	0.0327429	0.100615	0.325428	0.744857	0.999862
YLR291C	430.707	0.117936	0.0937701	1.25772	0.208494	0.999862
YDR210W	176.647	0.0668495	0.160164	0.417382	0.676399	0.999862
YIL122W	424.453	0.121919	0.0907925	1.34283	0.179327	0.999862
YDL230W	322.482	0.337485	0.126071	2.67694	0.00742976	0.234663
YJR113C	1028.91	0.0972909	0.133784	0.727224	0.467088	0.999862
YGL075C	183.583	0.0654444	0.12485	0.524185	0.60015	0.999862
YHR041C	292.824	-0.137762	0.111348	-1.23721	0.216007	0.999862
YIL156W-B	382.749	0.0624698	0.17419	0.358631	0.719871	0.999862
YLR416C	2.64583	0.669844	1.01162	0.662148	0.507876	NA
YGR097W	1094.56	0.115318	0.119817	0.96245	0.335824	0.999862
YIL068C	508.869	0.00351035	0.117327	0.0299194	0.976131	0.999862
YCL025C	5641.6	0.17406	0.0792717	2.19574	0.0281104	0.573892
YNR034W	684.345	0.105422	0.108778	0.969149	0.332471	0.999862
YNL282W	113.273	0.124795	0.195687	0.637728	0.523651	0.999862
YBR286W	7032	0.0351123	0.106549	0.329542	0.741746	0.999862
YGL144C	266.955	-0.105729	0.121847	-0.867723	0.385546	0.999862
YDR190C	1406.77	0.0367946	0.0956311	0.384756	0.700418	0.999862
YAL031C	552.576	0.0285912	0.0879889	0.324941	0.745226	0.999862
YBL006C	461.444	-0.186818	0.176354	-1.05933	0.289448	0.999862
YNL132W	674.25	0.0778494	0.122244	0.636836	0.524232	0.999862
YBR264C	149.638	-0.049354	0.167789	-0.294144	0.768648	0.999862
YBR231C	271.682	0.154938	0.126142	1.22828	0.219342	0.999862
YPL197C	3.2079	-1.31588	0.979224	-1.3438	0.179013	0.999862
YHR076W	610.472	-0.0669275	0.106995	-0.625517	0.531632	0.999862
YDR462W	498.564	0.144981	0.155014	0.935274	0.349647	0.999862
YJL148W	427.963	0.0204376	0.178798	0.114305	0.908996	0.999862
YIL057C	1168.6	-0.379277	0.549665	-0.690016	0.490184	0.999862
YPL055C	298.469	0.0711868	0.166001	0.428835	0.668044	0.999862
YLR353W	507.746	0.304593	0.0868262	3.50808	0.000451359	0.0276388
YIL020C	164.131	-0.0203437	0.147647	-0.137786	0.89041	0.999862
YIL148W	3940.89	-0.0738748	0.102376	-0.721601	0.47054	0.999862
YNR016C	12385.6	-0.0448707	0.0880459	-0.509628	0.610312	0.999862
YFR036W	90.8388	-0.119409	0.192061	-0.621723	0.534124	0.999862
YER023C-A	1.53148	-0.441652	1.50553	-0.293354	0.769252	NA
YHR114W	596.097	-0.00793878	0.120312	-0.0659852	0.94739	0.999862
YGR028W	486.248	0.0275921	0.125239	0.220315	0.825626	0.999862
YER150W	791.782	-0.379105	0.128287	-2.95512	0.00312545	0.120846
YNL279W	38.3489	0.0739098	0.25975	0.284542	0.775995	0.999862
YDR400W	248.824	0.169036	0.129485	1.30544	0.191741	0.999862
YOL027C	1531.04	-0.0324397	0.0954346	-0.339915	0.73392	0.999862
YPL257W	63.2478	-0.4305	0.233742	-1.84177	0.0655088	0.874932
YPL120W	140.291	0.0190029	0.190906	0.0995408	0.920709	0.999862
YOL145C	1170.11	-0.0384426	0.137627	-0.279325	0.779995	0.999862
YJL099W	394.425	0.095171	0.107289	0.887049	0.375053	0.999862
YHR149C	788.743	-0.0295564	0.0933807	-0.316515	0.751611	0.999862
YDR395W	665.02	0.0202673	0.184739	0.109708	0.912641	0.999862
YOL110W	352.743	0.0651336	0.138751	0.469427	0.638764	0.999862
YDR005C	747.899	-0.165799	0.133526	-1.2417	0.214348	0.999862
YMR311C	1396.96	0.03785	0.129652	0.291937	0.770335	0.999862
YBL039C	841.156	0.0027048	0.134826	0.0200615	0.983994	0.999862
YGR188C	189.693	-0.0345997	0.131272	-0.263573	0.792109	0.999862
YOR362C	1668.2	0.00928825	0.121808	0.0762534	0.939217	0.999862
YPR106W	314.184	-0.0212165	0.158274	-0.134049	0.893364	0.999862
YLR126C	258.771	-0.143647	0.160138	-0.897021	0.369707	0.999862
YDL053C	635.948	-0.0295241	0.0903231	-0.326872	0.743765	0.999862
YML074C	1831.03	-0.0872773	0.138358	-0.630809	0.528165	0.999862
YKR062W	481.05	0.0897775	0.0966993	0.92842	0.35319	0.999862
YBR235W	633.111	0.0102741	0.11937	0.0860696	0.931411	0.999862
YER010C	400.381	-0.00044029	0.099999	-0.00440294	0.996487	0.999862
YML003W	70.9627	0.175579	0.252086	0.696503	0.486114	0.999862
YMR097C	375.971	-0.12497	0.102613	-1.21787	0.223274	0.999862
YDL133W	473.392	0.0721608	0.0955571	0.755159	0.450154	0.999862
YNL330C	842.076	-0.0237051	0.0766783	-0.30915	0.757207	0.999862
YGR228W	9.81305	-0.540881	0.708829	-0.763062	0.445427	0.999862
YHR096C	1215.81	-0.14086	0.170608	-0.825634	0.409012	0.999862
YBR008C	339.503	-0.0912938	0.109522	-0.833563	0.404527	0.999862
YDL035C	807.528	-0.00970275	0.0814304	-0.119154	0.905153	0.999862
YMR253C	284.954	0.0291528	0.11436	0.254923	0.798783	0.999862
YCR102C	94.8099	-0.219768	0.298814	-0.735469	0.462054	0.999862
YJL127C-B	331.033	-0.326094	0.190387	-1.7128	0.0867495	0.997287
YOR257W	404.868	-0.166292	0.125666	-1.32329	0.18574	0.999862
YGR002C	410.847	0.0460122	0.0975574	0.471642	0.637182	0.999862
YEL041W	342.087	-0.397822	0.163719	-2.4299	0.015103	0.406425
YGR075C	76.5037	-0.190982	0.276036	-0.691874	0.489016	0.999862
YGR253C	1569.22	0.0441665	0.0851086	0.518943	0.6038	0.999862
YDR510W	1197.31	-0.0288502	0.143412	-0.20117	0.840566	0.999862
YPL050C	1140.72	0.031585	0.082996	0.38056	0.70353	0.999862
YMR166C	198.628	0.139381	0.142545	0.977801	0.328173	0.999862
YPR045C	418.786	0.0651898	0.141459	0.46084	0.644914	0.999862
YPL231W	10868.9	-0.190191	0.129301	-1.47092	0.141313	0.999862
YLR148W	334.091	0.0825822	0.209011	0.395109	0.692762	0.999862
YMR137C	217.672	-0.10987	0.175824	-0.624889	0.532044	0.999862
YDL082W	2169.14	-0.0343547	0.106974	-0.321148	0.748098	0.999862
YKL155C	609.679	-0.0003641	0.104893	-0.00347115	0.99723	0.999862
YBR162W-A	500.463	-0.10824	0.159464	-0.678778	0.497279	0.999862
YFL042C	731.532	-0.0726172	0.115506	-0.628689	0.529553	0.999862
YBL083C	139.44	-0.0687515	0.173218	-0.396907	0.691436	0.999862
YDR148C	6740.8	-0.362732	0.0901327	-4.02442	5.71169e-05	0.00457643
YHR052W-A	73.8497	0.411436	0.331368	1.24163	0.214374	0.999862
YPL096W	331.385	-0.0530702	0.105647	-0.502334	0.615432	0.999862
YDR335W	962.681	-0.0260326	0.123416	-0.210934	0.832939	0.999862
YPR141C	259.047	0.108396	0.192942	0.561807	0.574248	0.999862
YJL067W	1.37038	0.035315	1.45073	0.0243429	0.980579	NA
YMR039C	756.235	0.024133	0.118859	0.203039	0.839104	0.999862
YIL058W	4.14435	-0.0361809	0.787933	-0.0459188	0.963375	0.999862
YNL320W	228.616	0.0199223	0.116352	0.171223	0.864048	0.999862
YPL078C	5571.22	-0.366007	0.0672909	-5.43917	5.35287e-08	1.03621e-05
YCR095C	302.187	-0.164707	0.160677	-1.02508	0.305323	0.999862
YLL011W	569.877	0.0738661	0.138343	0.533936	0.593386	0.999862
YCR077C	1720.47	-0.0354586	0.108764	-0.326015	0.744413	0.999862
YLR437C	144.609	0.207776	0.180181	1.15315	0.24885	0.999862
YFL064C	135.411	0.46033	0.295098	1.55992	0.118778	0.999862
YNL191W	175.398	0.144331	0.15251	0.946375	0.343957	0.999862
YDR237W	705.205	-0.0114447	0.111515	-0.10263	0.918257	0.999862
YJL110C	546.573	0.0303461	0.132209	0.229531	0.818456	0.999862
YKR048C	1717.8	0.0190856	0.0926878	0.205912	0.836859	0.999862
YBR001C	618.001	0.0855158	0.105066	0.81392	0.415691	0.999862
YPL003W	262.864	0.179235	0.151513	1.18297	0.236822	0.999862
YKL108W	293.487	-0.0717569	0.109087	-0.657797	0.510668	0.999862
YGR110W	224.909	-0.188102	0.118586	-1.58621	0.112691	0.999862
YJR074W	437.304	-0.225211	0.110331	-2.04124	0.0412273	0.702856
YPR127W	690.311	-0.0653841	0.0945238	-0.691721	0.489113	0.999862
YIR028W	11.2046	0.142256	0.45844	0.310306	0.756329	0.999862
YAL012W	912.049	0.0603861	0.157223	0.384079	0.70092	0.999862
YMR288W	452.356	0.0054306	0.105075	0.0516829	0.958781	0.999862
YIL156W	460.149	0.0631741	0.113736	0.555443	0.578592	0.999862
YBR241C	956.74	0.0614855	0.132288	0.464786	0.642085	0.999862
YJL212C	25.7161	0.120612	0.380886	0.316661	0.751501	0.999862
YPL156C	360.648	0.0275145	0.191018	0.144041	0.885468	0.999862
YNL312W	739.432	-0.0488203	0.105894	-0.461031	0.644777	0.999862
YLR187W	266.662	0.195604	0.124439	1.57188	0.115977	0.999862
YDR099W	3694.94	-0.0313575	0.0885963	-0.353937	0.723386	0.999862
YKL133C	296.529	0.054864	0.13804	0.397449	0.691036	0.999862
YHR170W	1049.69	0.0267972	0.130527	0.2053	0.837337	0.999862
YDR259C	140.809	0.399608	0.169401	2.35895	0.0183268	0.456938
YKL068W	723.208	-0.0455662	0.090918	-0.501179	0.616245	0.999862
YOR032C	65.2227	-0.607067	0.279519	-2.17183	0.0298684	0.594479
YKL093W	1318.01	-0.0985849	0.11845	-0.832292	0.405244	0.999862
YMR002W	2158.74	0.176712	0.130546	1.35364	0.175852	0.999862
YLR145W	184.394	0.0427344	0.144251	0.29625	0.767039	0.999862
YLR261C	162.275	-0.0502223	0.15912	-0.315625	0.752287	0.999862
YDL246C	98.2884	-0.0156637	1.24913	-0.0125396	0.989995	0.999862
YER081W	486.976	0.111526	0.101384	1.10003	0.271319	0.999862
YPL178W	590.51	-0.058548	0.090987	-0.643476	0.519915	0.999862
YPR202W	132.931	-0.274093	0.65293	-0.419789	0.674639	0.999862
YIL096C	174.378	-0.184528	0.186841	-0.987622	0.323338	0.999862
YFR011C	829.868	-0.336009	0.0928406	-3.6192	0.000295514	0.0190686
YIL074C	572.02	-0.0045875	0.0855439	-0.0536274	0.957232	0.999862
YGL173C	2170.42	-0.0245563	0.12251	-0.200443	0.841134	0.999862
YHL008C	449.519	0.0132142	0.138632	0.0953186	0.924062	0.999862
YLR457C	238.681	-0.0894793	0.12435	-0.719575	0.471787	0.999862
YNL249C	159.947	0.00350525	0.150214	0.0233351	0.981383	0.999862
YGR056W	547.606	-0.0295814	0.111176	-0.266078	0.790179	0.999862
YGL065C	448.871	-0.0252806	0.177389	-0.142515	0.886673	0.999862
YOR052C	690.366	0.0173198	0.0979194	0.176878	0.859604	0.999862
YGR116W	1658.44	-0.061262	0.131594	-0.465538	0.641546	0.999862
YOR343C	35.1194	0.094682	0.265357	0.35681	0.721234	0.999862
YGL230C	8.65068	0.416494	0.543573	0.766215	0.443549	0.999862
YOL159C	142.851	0.159567	0.198341	0.804507	0.421104	0.999862
YBR185C	463.53	0.0736281	0.137137	0.536896	0.591339	0.999862
YOR010C	93.4085	0.100323	0.18118	0.553718	0.579772	0.999862
YDR019C	224.9	0.155578	0.187274	0.830751	0.406114	0.999862
YBR150C	450.45	-0.113356	0.154252	-0.734877	0.462415	0.999862
YIR042C	131.632	0.565955	0.236261	2.39546	0.0165994	0.431224
YER119C	515.747	0.120391	0.112075	1.0742	0.282733	0.999862
YMR196W	2273.27	0.0593101	0.12246	0.484323	0.628156	0.999862
YMR161W	376.856	0.0518931	0.112854	0.459824	0.645643	0.999862
YDR499W	379.522	0.0173514	0.132167	0.131284	0.89555	0.999862
YKL068W-A	102.868	0.0420288	0.187019	0.22473	0.822189	0.999862
YJL133C-A	420.728	0.35456	0.184806	1.91855	0.0550408	0.807579
YDL215C	5126.71	0.219175	0.209642	1.04548	0.295803	0.999862
YJR120W	96.5266	-0.274205	0.326952	-0.838672	0.401654	0.999862
YLL061W	265.981	-0.0310959	0.11975	-0.259674	0.795115	0.999862
YDR110W	344.528	-0.08108	0.107537	-0.753969	0.450868	0.999862
YDR419W	345.109	-0.080997	0.102119	-0.793163	0.427683	0.999862
YOR221C	696.483	-0.116677	0.114725	-1.01701	0.30915	0.999862
YPL214C	498.686	0.00970706	0.0877804	0.110583	0.911947	0.999862
YBL108C-A	24.6497	-0.163264	0.349094	-0.467678	0.640015	0.999862
YGL165C	1.73163	1.41978	1.32112	1.07468	0.28252	NA
YOL064C	347.273	0.00496604	0.10489	0.0473451	0.962238	0.999862
YBL023C	686.242	0.320711	0.0948197	3.38233	0.000718741	0.0401477
YOR274W	352.456	-0.0286217	0.0983056	-0.291151	0.770936	0.999862
YOR329C	925.042	0.0166295	0.114711	0.144969	0.884735	0.999862
YLR005W	636.201	0.0232326	0.0909938	0.25532	0.798476	0.999862
YDR124W	48.7784	-0.159208	0.253524	-0.62798	0.530017	0.999862
YNL267W	772.805	0.0212719	0.0891017	0.238737	0.811309	0.999862
YLR461W	4.03544	0.776221	1.29382	0.599947	0.548542	0.999862
YLR050C	274.308	0.250475	0.159013	1.57518	0.115215	0.999862
YOR124C	813.006	0.0392395	0.150785	0.260234	0.794683	0.999862
YDR067C	169.64	-0.0347556	0.182807	-0.190122	0.849214	0.999862
YMR056C	454.544	0.131757	0.124006	1.0625	0.288008	0.999862
YHR032W-A	45.2919	-0.1667	0.284664	-0.585604	0.558142	0.999862
YJL044C	524.328	0.0512077	0.134373	0.381086	0.703139	0.999862
YPR164W	384.84	-0.100445	0.161543	-0.621789	0.534081	0.999862
YEL060C	5983.19	-0.00465367	0.131133	-0.0354881	0.971691	0.999862
YHR195W	565.493	0.0139503	0.108521	0.12855	0.897714	0.999862
YLR101C	13.6794	0.133136	0.438585	0.303559	0.761464	0.999862
YBL107W-A	3.44861	0.851768	0.89951	0.946925	0.343677	0.999862
YML026C	3418.56	-0.155486	0.124979	-1.24409	0.213465	0.999862
YPR066W	122.512	0.119258	0.180751	0.659789	0.509389	0.999862
YDR073W	274.253	-0.0906795	0.130667	-0.693974	0.487698	0.999862
YDR229W	577.584	-0.134625	0.103847	-1.29639	0.194843	0.999862
YDL181W	1643.81	-0.286453	0.115929	-2.47093	0.0134762	0.386942
YBR022W	163.669	0.114017	0.14034	0.812434	0.416543	0.999862
YER177W	5919.56	-0.0208678	0.145503	-0.143418	0.88596	0.999862
YML048W	2718.03	-0.0823955	0.0745192	-1.10569	0.268859	0.999862
YBL064C	4539.85	-0.076937	0.114238	-0.673478	0.500643	0.999862
YIL045W	306.568	-0.0136484	0.150123	-0.090915	0.92756	0.999862
YKL221W	24.5752	0.427462	0.311327	1.37303	0.169743	0.999862
YGL126W	417.315	0.147236	0.13703	1.07448	0.28261	0.999862
YLR167W	11323.3	-0.0547457	0.118882	-0.460505	0.645153	0.999862
YMR270C	383.064	-0.142531	0.0910665	-1.56513	0.117552	0.999862
YLR293C	2387.08	0.0549835	0.114591	0.479825	0.631352	0.999862
YLR228C	449.101	0.0294968	0.105609	0.279301	0.780014	0.999862
YJR053W	128.043	-0.131923	0.163317	-0.807772	0.419222	0.999862
YJL171C	970.819	0.203696	0.119806	1.70021	0.089092	0.999862
YDR374C	3.99407	-0.357402	0.820388	-0.43565	0.663091	0.999862
YKL021C	475.707	-0.0308496	0.109022	-0.282966	0.777203	0.999862
YDL167C	551.915	0.00644776	0.116106	0.0555336	0.955713	0.999862
YLR388W	1215.32	-0.0326559	0.114145	-0.286092	0.774808	0.999862
YLR373C	527.612	-0.121704	0.194002	-0.627333	0.530441	0.999862
YKR001C	1888.49	-0.0362195	0.09342	-0.387706	0.698233	0.999862
YKR054C	472.109	0.0953121	0.122589	0.777495	0.436867	0.999862
YIR034C	403.97	-0.00691208	0.156512	-0.0441632	0.964774	0.999862
YGL013C	536.522	0.0066073	0.147395	0.0448271	0.964245	0.999862
YJR068W	526.742	-0.11729	0.107692	-1.08912	0.276099	0.999862
YGR207C	722.164	0.0797034	0.104605	0.761946	0.446092	0.999862
YDR212W	1343.06	-0.00664874	0.0683525	-0.0972713	0.922511	0.999862
YNL052W	4090.64	-0.623233	0.11835	-5.26604	1.39402e-07	2.46044e-05
YGL188C	398.627	-0.401025	0.099656	-4.02409	5.71958e-05	0.00457643
YNL025C	180.767	0.0697894	0.176137	0.396223	0.69194	0.999862
YGR121W-A	6.56696	-0.194065	0.684489	-0.283519	0.776779	0.999862
YGR091W	217.846	0.0911261	0.148365	0.614201	0.539083	0.999862
YDL232W	100.261	-0.00915532	0.2286	-0.0400496	0.968054	0.999862
YPL119C	460.538	0.0285611	0.105801	0.26995	0.787199	0.999862
YLR242C	75.9857	-0.166292	0.303806	-0.547362	0.58413	0.999862
YJR148W	1020.63	0.215887	0.113699	1.89876	0.057596	0.83085
YJR082C	296.297	-0.221715	0.129418	-1.71317	0.0866808	0.997287
YOL087C	1428.28	-0.0200632	0.106748	-0.187949	0.850916	0.999862
YNL134C	5887.69	-0.190684	0.122605	-1.55528	0.11988	0.999862
YAL037W	52.4527	0.136951	0.234597	0.583771	0.559374	0.999862
YGL146C	423.194	-0.242376	0.143422	-1.68996	0.0910359	0.999862
YBR262C	777.188	-0.0513554	0.147495	-0.348184	0.727702	0.999862
YPL199C	292.073	0.130824	0.125574	1.04181	0.2975	0.999862
YML101C-A	7.59181	0.390841	0.5816	0.67201	0.501577	0.999862
YFL036W	1464.44	0.0284494	0.139152	0.204448	0.838003	0.999862
YDL209C	205.706	-0.00973303	0.138103	-0.0704767	0.943814	0.999862
YIL051C	1176.47	0.101914	0.0862974	1.18096	0.237619	0.999862
YPL057C	1292.64	-0.191171	0.100811	-1.89632	0.0579173	0.833418
YNR010W	97.0317	0.176321	0.185088	0.952634	0.340776	0.999862
YDR365C	883.24	0.0321685	0.105118	0.306022	0.759588	0.999862
YLR308W	4.25262	1.06523	0.785252	1.35654	0.174927	0.999862
YNL169C	1462.41	-0.198637	0.12024	-1.652	0.0985345	0.999862
YFR034C	525.676	0.00573455	0.110862	0.0517267	0.958746	0.999862
YHR070W	338.975	0.00767392	0.101793	0.0753874	0.939906	0.999862
YDR460W	391.551	0.0932066	0.0957744	0.973189	0.330459	0.999862
YNL112W	2330.54	0.022253	0.205494	0.10829	0.913765	0.999862
YHL047C	376.014	-0.111625	0.160351	-0.696131	0.486347	0.999862
YOR360C	672.997	-0.0965728	0.216639	-0.445777	0.655758	0.999862
YOR335C	2427.24	-0.0735034	0.091984	-0.799088	0.424239	0.999862
YGL251C	197.452	-0.207783	0.123375	-1.68416	0.092151	0.999862
YER156C	1309.15	0.0121536	0.110028	0.110459	0.912046	0.999862
YPL255W	307.312	0.0333645	0.121792	0.273947	0.784126	0.999862
YOR095C	480.49	-0.152838	0.121714	-1.25572	0.209219	0.999862
YEL038W	586.994	-0.014951	0.148563	-0.100637	0.919839	0.999862
YCL014W	585.788	0.245634	0.0979527	2.50768	0.0121527	0.35319
YOL025W	274.666	0.0575531	0.168032	0.342512	0.731966	0.999862
YPL208W	390.043	-0.101621	0.112543	-0.902959	0.366548	0.999862
YOL147C	521.903	-0.0334359	0.15157	-0.220598	0.825406	0.999862
YNL280C	1047.18	0.100183	0.140815	0.711448	0.476807	0.999862
YDR007W	3916.53	2.76605	0.12335	22.4245	2.27139e-111	1.36306e-107
YIL160C	408.386	0.337033	0.218443	1.54289	0.122859	0.999862
YPR089W	718.822	0.011373	0.175833	0.0646805	0.948428	0.999862
YBR233W	356.381	-0.028159	0.120727	-0.233246	0.81557	0.999862
YPL122C	310.47	-0.106766	0.174905	-0.610422	0.541583	0.999862
YKL104C	2517.11	0.228015	0.0843968	2.7017	0.00689866	0.221384
YMR313C	575.119	0.0617143	0.0922893	0.668705	0.503684	0.999862
YGL179C	220.717	0.0557194	0.139971	0.398077	0.690574	0.999862
YGR120C	161.842	0.037049	0.142618	0.259778	0.795035	0.999862
YML001W	937.422	-0.0200204	0.0853752	-0.2345	0.814597	0.999862
YLL028W	535.995	0.151355	0.125804	1.2031	0.228938	0.999862
YER016W	396.294	-0.0707189	0.111906	-0.631948	0.527421	0.999862
YHR061C	361.149	0.0503076	0.167858	0.299703	0.764404	0.999862
YDR438W	179.812	-0.0193336	0.150612	-0.128367	0.897858	0.999862
YNL211C	43.809	-0.044075	0.391976	-0.112443	0.910472	0.999862
YLR124W	1.27726	0.864789	1.30335	0.663515	0.507001	NA
YML058W-A	13.2461	0.747406	0.429412	1.74053	0.0817656	0.965896
YLR026C	515.447	0.000148694	0.113689	0.00130791	0.998956	0.999962
YJR065C	1957.13	0.0557713	0.0991407	0.562547	0.573743	0.999862
YDL131W	1250.87	-0.0832424	0.111204	-0.748557	0.454124	0.999862
YMR095C	31.5122	0.562125	0.287263	1.95683	0.0503678	0.776694
YER138C	2225.06	0.25565	0.115074	2.22161	0.0263097	0.552044
YDL033C	147.116	0.0914569	0.203292	0.449879	0.652798	0.999862
YMR255W	522.686	0.0154	0.106712	0.144314	0.885252	0.999862
YHR209W	406.485	0.299081	0.117831	2.53821	0.0111421	0.329378
YGL247W	130.172	-0.224511	0.164486	-1.36492	0.172277	0.999862
YCR100C	26.5905	-0.40414	0.338312	-1.19458	0.232252	0.999862
YDR516C	3152.74	-0.0823466	0.108353	-0.759988	0.447262	0.999862
Q0130	5.47668	-1.23146	0.949613	-1.2968	0.194699	0.999862
YPL233W	235.621	0.0364253	0.143018	0.25469	0.798963	0.999862
YOR063W	16516.8	-0.0414835	0.114296	-0.362948	0.716643	0.999862
YGR251W	178.591	-0.121579	0.133003	-0.914104	0.360662	0.999862
YPR047W	389.189	0.0620352	0.123712	0.50145	0.616054	0.999862
YDR246W-A	12.4603	0.346746	0.465333	0.745155	0.456178	0.999862
YDR044W	569.846	0.048962	0.11543	0.424171	0.671441	0.999862
YEL016C	421.434	0.0230176	0.0994717	0.231398	0.817005	0.999862
YAL027W	189.619	-0.148493	0.120201	-1.23538	0.216691	0.999862
YKL153W	21.135	-0.609327	0.483101	-1.26128	0.207207	0.999862
YFL019C	5.35266	0.703493	0.696781	1.00963	0.312671	0.999862
YMR139W	662.12	0.0193617	0.138671	0.139623	0.888958	0.999862
YDL080C	360.332	-0.0496813	0.100367	-0.494996	0.620603	0.999862
YOR172W	414.362	0.021352	0.160438	0.133085	0.894126	0.999862
YOR105W	107.674	0.302108	0.257058	1.17525	0.239894	0.999862
YJL138C	6137.83	-0.00396522	0.0836419	-0.0474071	0.962189	0.999862
YPR143W	491.086	-0.131656	0.129052	-1.02018	0.307644	0.999862
YDR340W	42.2238	-2.54091e-05	0.531452	-4.78107e-05	0.999962	0.999962
YNL322C	1254.19	0.0218292	0.10784	0.202422	0.839587	0.999862
YPL090C	5674.14	-0.132708	0.127159	-1.04364	0.296653	0.999862
YPR078C	3.03638	-0.152874	0.978549	-0.156226	0.875855	0.999862
YCR075C	245.261	-0.0542312	0.139304	-0.389301	0.697054	0.999862
YFL062W	16.5486	1.27348	0.433097	2.94041	0.00327774	0.123889
YDR171W	2917.18	0.023954	0.176747	0.135527	0.892195	0.999862
YLR439W	984.568	-0.042905	0.114319	-0.375309	0.707431	0.999862
YCR020C	82.1802	0.0126459	0.21022	0.0601556	0.952032	0.999862
YDR450W	4203.4	-0.0956256	0.138964	-0.688133	0.491369	0.999862
YCL051W	640.763	-0.0606634	0.115515	-0.525155	0.599475	0.999862
YCR097W	460.919	-0.348146	0.179397	-1.94064	0.0523016	0.788597
YBL039C-A	1.6677	0.992202	1.95399	0.507783	0.611605	NA
YDR235W	250.963	-0.169207	0.305131	-0.554538	0.579211	0.999862
YGL194C-A	29.1639	0.154221	0.303991	0.507321	0.611929	0.999862
YER038C	119.517	0.0772067	0.212632	0.3631	0.71653	0.999862
YPR125W	678.843	-0.0321444	0.0872987	-0.368212	0.712715	0.999862
YHR049W	1447.59	-0.236584	0.131449	-1.79981	0.0718904	0.912081
YBR007C	368.086	0.0339386	0.117161	0.289675	0.772065	0.999862
YPL001W	238.493	0.103894	0.143365	0.724681	0.468648	0.999862
YJL038C	3.00379	0.51184	1.26093	0.405923	0.684799	0.999862
YNL319W	2.01462	0.305607	1.2708	0.240483	0.809955	NA
YPR178W	292.67	0.0392269	0.138506	0.283216	0.777012	0.999862
YDR475C	755.714	0.0885667	0.145776	0.607552	0.543485	0.999862
TLC1	984.333	0.0922397	0.207336	0.44488	0.656406	0.999862
YNL159C	241.373	0.186702	0.115838	1.61175	0.107015	0.999862
YAL014C	368.347	-0.0820536	0.118375	-0.693166	0.488205	0.999862
YCR020W-B	69.2063	-0.42078	0.348868	-1.20613	0.227768	0.999862
YBR243C	565.008	0.0726149	0.0929912	0.78088	0.434873	0.999862
YLR181C	352.758	0.0360999	0.110717	0.326055	0.744383	0.999862
YBL056W	1954.3	-0.0541703	0.103423	-0.523776	0.600434	0.999862
YNL075W	487.254	-0.0851668	0.121081	-0.703389	0.481813	0.999862
YPL150W	599.907	-0.00620412	0.0909168	-0.0682395	0.945595	0.999862
YJL012C	1024.09	-0.0281473	0.0694389	-0.405353	0.685218	0.999862
YJL065C	245.275	-0.0586315	0.124355	-0.471486	0.637293	0.999862
YKR020W	187.336	0.039579	0.130878	0.30241	0.762339	0.999862
YMR053C	207.796	0.147721	0.140501	1.05138	0.293082	0.999862
YKL066W	419.185	-0.448875	0.179063	-2.5068	0.012183	0.35319
YMR004W	522.928	-0.0527559	0.109433	-0.482085	0.629746	0.999862
YER083C	756.391	-0.0178243	0.113667	-0.156812	0.875393	0.999862
YPL176C	874.024	0.080074	0.124955	0.640821	0.521639	0.999862
YHR172W	283.174	0.136951	0.150631	0.90918	0.363255	0.999862
YLR263W	930.396	-0.0548045	0.149219	-0.367276	0.713414	0.999862
YDL240W	764.89	-0.0949	0.157051	-0.604263	0.545669	0.999862
YDR401W	3.28857	0.913852	0.943202	0.968883	0.332604	0.999862
YGL118C	1.96535	-0.0698657	1.15478	-0.0605012	0.951756	NA
YHR013C	376.046	-0.127586	0.0987283	-1.29229	0.196255	0.999862
YOL040C	4938.11	-0.0331775	0.121358	-0.273386	0.784557	0.999862
YGR072W	320.271	-0.257294	0.136691	-1.8823	0.0597952	0.833418
YCL035C	1232.22	0.106332	0.14408	0.738005	0.460511	0.999862
YIL023C	541.551	0.129317	0.108517	1.19167	0.23339	0.999862
YNR073C	201.645	-0.00705561	0.172602	-0.0408778	0.967393	0.999862
YPR200C	48.3641	-0.361808	0.269882	-1.34061	0.180046	0.999862
YIL072W	90.9887	0.29858	0.16945	1.76205	0.0780601	0.942533
YLR327C	5738.08	-0.105941	0.209598	-0.505448	0.613244	0.999862
YBR229C	740.197	0.0798028	0.107466	0.742585	0.457733	0.999862
YML133C	26.8138	-0.0302047	0.60484	-0.0499384	0.960171	0.999862
YOR131C	406.263	-0.0961277	0.140206	-0.685616	0.492955	0.999862
YLR455W	386.912	0.0434795	0.1082	0.401844	0.687799	0.999862
YNL247W	1335.73	-0.0488472	0.0911374	-0.535973	0.591977	0.999862
YOR054C	706.699	0.000357358	0.131329	0.00272109	0.997829	0.999862
YGL007C-A	8.39706	-0.456964	0.520068	-0.878662	0.379585	0.999862
YFR028C	647.778	0.0566992	0.105501	0.537426	0.590974	0.999862
YOR009W	157.266	0.19282	0.163499	1.17933	0.238265	0.999862
YOR072W	6.4124	-0.130874	0.706448	-0.185257	0.853028	0.999862
YDR292C	764.125	-0.0988696	0.104877	-0.942715	0.345827	0.999862
YOR161C-C	4.38788	0.437378	0.789511	0.553986	0.579588	0.999862
YHR126C	4.54516	0.118387	0.722326	0.163896	0.869813	0.999862
YMR194W	990.02	-0.0859723	0.154186	-0.557587	0.577127	0.999862
YAL016C-A	2.44253	-0.789266	1.00807	-0.782946	0.433659	NA
YMR167W	241.964	-0.0586437	0.140985	-0.415958	0.677441	0.999862
YOR249C	230.722	0.0612937	0.229372	0.267224	0.789296	0.999862
YER117W	3724.7	-0.140146	0.136317	-1.02809	0.303908	0.999862
YOR301W	124.253	0.292781	0.177069	1.65349	0.0982316	0.999862
YPL187W	228.071	0.875445	0.492825	1.77638	0.0756703	0.932665
YKL218C	231.806	0.301144	0.131947	2.28232	0.0224706	0.510781
YOR140W	711.253	-0.0494721	0.0953576	-0.518806	0.603896	0.999862
YDR391C	406.334	0.207499	0.115699	1.79343	0.0729037	0.916409
YLL063C	169.886	0.234669	0.156014	1.50416	0.13254	0.999862
YOR276W	980.481	-0.200195	0.0960244	-2.08484	0.0370839	0.658316
YMR309C	1674.33	0.004959	0.231614	0.0214106	0.982918	0.999862
YOR089C	894.039	-0.0299724	0.0946779	-0.316572	0.751568	0.999862
tD(GUC)N	2.3089	1.38887	1.43977	0.964646	0.334722	NA
YGR258C	558.837	0.0636592	0.116407	0.546868	0.584469	0.999862
YNL146C-A	16.3032	0.137456	0.462549	0.29717	0.766337	0.999862
YMR180C	299.79	0.1712	0.131478	1.30213	0.192873	0.999862
YGL163C	549.034	0.181276	0.109122	1.66122	0.0966692	0.999862
YDR417C	4.54788	0.0445754	0.90365	0.0493282	0.960658	0.999862
YOL131W	4.51169	0.437229	0.727439	0.601053	0.547805	0.999862
YPL283C	1299.3	0.231627	0.0985819	2.34959	0.0187941	0.461801
YBL021C	234.178	-0.330085	0.170506	-1.93592	0.0528776	0.789488
YHR215W	135.303	-0.466973	0.285681	-1.63459	0.102134	0.999862
YLL045C	5709.76	-0.00283992	0.125754	-0.0225831	0.981983	0.999862
YLR007W	471.448	0.0295689	0.133033	0.222267	0.824106	0.999862
YNL261W	193.63	0.0859607	0.181763	0.472927	0.636266	0.999862
YNL305C	1047.91	0.163695	0.0882598	1.85469	0.06364	0.857545
YJL046W	298.535	-0.0619549	0.1552	-0.399193	0.689751	0.999862
YKR078W	275.987	-0.0770572	0.13525	-0.569738	0.568855	0.999862
YOR191W	843.219	0.0168504	0.120151	0.140244	0.888467	0.999862
YEL074W	26.8834	0.178142	0.331146	0.537955	0.590608	0.999862
YDR272W	1008.81	0.0321101	0.07806	0.411351	0.680815	0.999862
YGR289C	896.392	-0.0996737	0.105635	-0.94357	0.34539	0.999862
YML020W	461.58	-0.0579813	0.0993293	-0.583728	0.559403	0.999862
YLR103C	331.741	-0.0738898	0.117276	-0.630052	0.528661	0.999862
YOR294W	468.816	-0.0235398	0.154366	-0.152493	0.878798	0.999862
YEL062W	168.581	0.0201175	0.129969	0.154787	0.876989	0.999862
YPR064W	4.82694	0.864864	0.740103	1.16857	0.242576	0.999862
YPR031W	448.389	-0.100116	0.097759	-1.02411	0.305785	0.999862
YLR038C	2989.36	-0.554827	0.0613657	-9.04133	1.54781e-19	1.32692e-16
YNL096C	2022.2	-0.0750933	0.102708	-0.731133	0.464698	0.999862
YDR038C	656.931	0.0382019	0.111157	0.343674	0.731091	0.999862
YDL187C	8.24797	-0.0281719	0.560955	-0.0502214	0.959946	0.999862
YBR024W	394.332	0.206754	0.109157	1.89409	0.0582127	0.833418
YER171W	448.962	0.0811911	0.13478	0.602395	0.546911	0.999862
YDL047W	1140.73	-0.0608093	0.102869	-0.591136	0.554429	0.999862
YML046W	277.211	-0.0549974	0.230999	-0.238085	0.811815	0.999862
YGL124C	277.818	0.0129283	0.115821	0.111623	0.911122	0.999862
YMR276W	1696.48	0.0661933	0.123217	0.537211	0.591122	0.999862
YEL059W	5.51461	0.822547	0.678453	1.21239	0.225365	0.999862
YDL160C-A	62.9163	-0.0258351	0.228877	-0.112878	0.910128	0.999862
YLR165C	215.712	0.0132774	0.128655	0.103202	0.917803	0.999862
YCR069W	1131.8	0.0707805	0.104569	0.676879	0.498483	0.999862
YGR146C-A	1.59879	-1.68669	1.50107	-1.12365	0.26116	NA
YKL027W	411.457	0.0316709	0.106828	0.296468	0.766873	0.999862
YJL173C	432.336	-0.163466	0.110405	-1.4806	0.138714	0.999862
YDR152W	719.657	-0.00566497	0.0857159	-0.06609	0.947306	0.999862
YKL127W	716.851	0.0396142	0.121805	0.325226	0.74501	0.999862
YDR309C	1766.1	-0.0537299	0.0913313	-0.588296	0.556334	0.999862
YLR386W	444.767	-0.0720016	0.141932	-0.507297	0.611947	0.999862
YLR371W	916.112	-0.024505	0.10082	-0.243057	0.807962	0.999862
YDL169C	377.631	0.0283122	0.132149	0.214245	0.830356	0.999862
YLR092W	156.754	-0.154558	0.213857	-0.722714	0.469856	0.999862
YER044C	2026.05	-0.161085	0.107484	-1.49869	0.133954	0.999862
YMR072W	1507.21	-0.0411607	0.107444	-0.383091	0.701652	0.999862
YJR033C	595.689	0.0631708	0.111116	0.56851	0.569689	0.999862
YKR056W	722.949	-0.0213446	0.0946238	-0.225573	0.821533	0.999862
YGL011C	1551.52	0.0581267	0.0898335	0.647049	0.5176	0.999862
YIR036C	642.739	0.0645949	0.131616	0.490783	0.62358	0.999862
YMR123W	341.983	-0.0553349	0.132769	-0.416776	0.676842	0.999862
YDR406W	1514.12	-0.330019	0.136298	-2.4213	0.0154652	0.409947
YGR073C	31.3646	-0.128164	0.269106	-0.476258	0.63389	0.999862
YGR209C	1669.2	-0.134553	0.12723	-1.05756	0.290255	0.999862
tS(UGA)E	2.14543	0.836196	1.16582	0.717258	0.473215	NA
YNL050C	378.457	-0.150999	0.119495	-1.26364	0.206358	0.999862
YMR304C-A	338.008	-0.0410497	0.234951	-0.174716	0.861302	0.999862
YLR240W	437.005	0.0408344	0.126393	0.323076	0.746638	0.999862
YGR093W	362.542	-0.0728826	0.109344	-0.666544	0.505064	0.999862
YDL234C	969.207	0.07146	0.112464	0.635405	0.525164	0.999862
YNL136W	537.056	-0.0565378	0.124082	-0.455649	0.648642	0.999862
YKL049C	390.36	0.0358243	0.144836	0.247344	0.804642	0.999862
YJR080C	1264.37	-0.197725	0.0915868	-2.15888	0.0308592	0.605184
YNR038W	363.149	-0.00620297	0.106888	-0.0580326	0.953723	0.999862
YGL140C	674.947	0.0460887	0.127513	0.361443	0.717768	0.999862
YCL029C	399.69	-0.0829403	0.118922	-0.697434	0.485531	0.999862
YFL038C	3068.26	-0.0397023	0.131996	-0.300784	0.763579	0.999862
YJR131W	342.504	0.0400161	0.120972	0.330788	0.740805	0.999862
YNR012W	183.943	0.0668596	0.165185	0.404757	0.685656	0.999862
YNL110C	845.169	-0.106587	0.126801	-0.840585	0.40058	0.999862
YDR367W	331.386	-0.034649	0.211341	-0.163948	0.869772	0.999862
YIL053W	2556.2	0.12147	0.240994	0.504038	0.614235	0.999862
YPL059W	805.737	0.0242828	0.116676	0.208123	0.835133	0.999862
YGL253W	19890.4	-0.169877	0.0561231	-3.02686	0.00247107	0.102978
YHL032C	2217.71	-0.250072	0.103794	-2.4093	0.015983	0.418838
YJL010C	392.141	-0.0648031	0.171227	-0.378462	0.705087	0.999862
YHL045W	2.65089	1.06421	0.956965	1.11207	0.266108	NA
YOR337W	325.387	-0.00307071	0.12709	-0.0241617	0.980724	0.999862
YMR010W	553.953	0.0944652	0.225648	0.41864	0.675479	0.999862
YOR097C	193.773	0.067448	0.129606	0.520408	0.602779	0.999862
YHR118C	147.54	-0.0390851	0.183411	-0.213101	0.831248	0.999862
YGR024C	471.141	0.0199991	0.208375	0.0959764	0.923539	0.999862
YOL023W	613.969	0.200646	0.0852333	2.35409	0.0185683	0.458553
YPL253C	233.687	0.34835	0.136431	2.5533	0.0106707	0.318582
YER154W	885.125	0.0499518	0.120123	0.41584	0.677527	0.999862
YBR300C	3.62545	0.535628	0.856621	0.62528	0.531787	0.999862
YEL036C	1389.51	0.0214829	0.104313	0.205946	0.836833	0.999862
YBR260C	462.704	-0.0236476	0.0896736	-0.263707	0.792005	0.999862
YPL124W	150.264	-0.0717552	0.147975	-0.484915	0.627737	0.999862
YAL042W	2010.62	0.00864375	0.111779	0.077329	0.938362	0.999862
YAL035W	2603.8	0.0273361	0.0683124	0.400163	0.689037	0.999862
YNL286W	265.399	-0.175246	0.134007	-1.30774	0.190963	0.999862
YDR001C	2392.87	0.0752551	0.121913	0.617286	0.537046	0.999862
YIL162W	18654.1	-0.06327	0.113573	-0.557086	0.577469	0.999862
YOL141W	72.4257	-0.127296	0.179472	-0.709279	0.478152	0.999862
YHR145C	9.21843	-0.220626	1.82832	-0.120672	0.903951	0.999862
YBR195C	225.745	-0.0271497	0.149626	-0.18145	0.856014	0.999862
YIL039W	1281	-0.0851226	0.0650024	-1.30953	0.190355	0.999862
YGR122W	377.157	-0.0478607	0.116132	-0.412125	0.680248	0.999862
YPL092W	168.029	0.0613493	0.170428	0.359971	0.718869	0.999862
YGR161C-D	441.851	0.215705	0.202321	1.06615	0.286356	0.999862
YMR315W	1300.61	-0.111375	0.119778	-0.929838	0.352455	0.999862
YGR213C	4.24601	1.22059	0.776956	1.57099	0.116184	0.999862
YDR384C	427.418	0.215926	0.138478	1.55928	0.11893	0.999862
YML007W	1843.76	-0.0457677	0.0742198	-0.61665	0.537465	0.999862
YER063W	879.883	-0.095748	0.108126	-0.885521	0.375875	0.999862
YDR481C	1069.14	0.245712	0.118015	2.08204	0.0373384	0.658316
YER014W	325.05	0.0600617	0.108273	0.554722	0.579085	0.999862
YPR041W	1733.08	0.0467904	0.0718973	0.650795	0.515179	0.999862
YNL213C	451.036	0.132161	0.0943145	1.40128	0.16113	0.999862
YKL006C-A	379.152	-0.0948676	0.168251	-0.563844	0.57286	0.999862
YBR058C	736.864	-0.0336462	0.112599	-0.298815	0.765081	0.999862
YLR024C	245.809	0.123162	0.19884	0.6194	0.535653	0.999862
YLR071C	680.875	0.0247264	0.196241	0.126	0.899732	0.999862
YHR092C	406.998	-0.0904813	0.632348	-0.143088	0.886221	0.999862
YDL199C	297.963	0.0492385	0.135611	0.363087	0.71654	0.999862
YHL007C	1295.81	-0.0100915	0.0738073	-0.136727	0.891247	0.999862
YNL228W	1.26216	2.17112	1.56068	1.39113	0.164185	NA
YDL064W	425.435	-0.132057	0.12025	-1.09818	0.272124	0.999862
YDL031W	884.293	0.0775379	0.0822692	0.94249	0.345942	0.999862
YMR257C	396.074	-0.094773	0.253928	-0.373228	0.708979	0.999862
YDR046C	2126.96	-0.108327	0.120187	-0.901322	0.367417	0.999862
YOR253W	328.165	-0.0130872	0.122567	-0.106776	0.914967	0.999862
YGL245W	2900.58	-0.0198836	0.0984307	-0.202006	0.839912	0.999862
YGR006W	142.657	-0.00808583	0.163865	-0.0493446	0.960645	0.999862
YGR079W	616.335	-0.0802165	0.173972	-0.461089	0.644735	0.999862
YDL119C	186.548	-0.043161	0.130641	-0.330378	0.741114	0.999862
YKL151C	1010.79	-0.0612184	0.129934	-0.471152	0.637532	0.999862
YGL198W	574.813	0.109451	0.139109	0.786802	0.431398	0.999862
YDL086W	1510.1	-0.0199466	0.149658	-0.133281	0.893971	0.999862
YBL091C-A	261.077	-0.162649	0.151019	-1.07701	0.281477	0.999862
YLR361C-A	197.939	-0.0744109	0.145715	-0.510662	0.609588	0.999862
YHR038W	287.708	0.0649533	0.148362	0.437803	0.661529	0.999862
YML069W	1329.05	-0.0690507	0.0832875	-0.829065	0.407068	0.999862
YKR019C	155.659	-0.0128899	0.162703	-0.0792235	0.936855	0.999862
YJR073C	4236.95	-0.202577	0.109893	-1.8434	0.0652703	0.874301
YGR279C	4162.73	0.0617815	0.081291	0.760005	0.447252	0.999862
YCR073C	308.833	0.249204	0.145109	1.71736	0.0859135	0.996587
YCR022C	9.54545	0.337459	0.491549	0.686522	0.492384	0.999862
YLL015W	990.404	-0.000840284	0.138542	-0.00606517	0.995161	0.999862
YNL195C	342.314	-0.0107235	0.191642	-0.0559561	0.955377	0.999862
YDL134C	1435.88	-0.0390414	0.0858414	-0.454809	0.649247	0.999862
YFL060C	188.595	-0.285325	0.151445	-1.88402	0.0595618	0.833418
YDR173C	177.928	-0.0248456	0.145602	-0.170641	0.864506	0.999862
YMR100W	374.417	-0.0211338	0.138578	-0.152505	0.878788	0.999862
YCL057W	1662.77	-0.049035	0.0809847	-0.605484	0.544857	0.999862
YBR072W	2005.26	-0.439595	0.213705	-2.05702	0.039684	0.683482
YBR005W	322.7	0.084164	0.14062	0.598521	0.549492	0.999862
YPR123C	10.8132	0.151152	0.618812	0.244261	0.807029	0.999862
RUF5-2	147.213	0.127143	0.207166	0.613725	0.539397	0.999862
YDL173W	928.685	-0.00570637	0.0969902	-0.0588344	0.953084	0.999862
YJR047C	15.8199	0.475963	0.462236	1.0297	0.303152	0.999862
YMR006C	1667.46	-0.0938103	0.116095	-0.808048	0.419063	0.999862
YKL145W-A	27.7806	-0.169101	0.45491	-0.371723	0.710099	0.999862
YAL016W	1698.72	-0.0750505	0.0922608	-0.813461	0.415954	0.999862
YMR292W	227.284	-0.223518	0.249584	-0.895563	0.370486	0.999862
YHR011W	226.985	0.000394363	0.119014	0.00331358	0.997356	0.999862
YPL152W	192.093	-0.0103504	0.142199	-0.0727883	0.941975	0.999862
YLR183C	586.763	-0.0213352	0.0871397	-0.244839	0.806581	0.999862
YNL077W	552.924	-0.182502	0.101076	-1.80559	0.0709829	0.906316
YBR109C	1388.88	0.0645771	0.0698916	0.923961	0.355506	0.999862
YBR172C	1114.54	-0.0650143	0.0954299	-0.681278	0.495696	0.999862
YDR346C	1577.46	-0.0750682	0.0789638	-0.950666	0.341774	0.999862
YAR002C-A	1494.81	-0.0452125	0.0938524	-0.481741	0.62999	0.999862
YOL077W-A	1908.63	-0.429671	0.0784946	-5.47388	4.40279e-08	8.80705e-06
YPL029W	330.221	0.0462788	0.100082	0.462408	0.643789	0.999862
YHR146W	1644.43	-0.0124176	0.17135	-0.0724689	0.942229	0.999862
YDL242W	2.11373	0.854605	1.13189	0.755027	0.450233	NA
YBR189W	5615.87	-0.0821277	0.126311	-0.650202	0.515562	0.999862
YER085C	2.65876	1.01008	1.08096	0.934431	0.350081	NA
YJL225C	2105.9	0.0290256	0.0710005	0.408809	0.68268	0.999862
YKL064W	1171.84	-0.0231591	0.10257	-0.225788	0.821366	0.999862
YLR265C	132.299	0.102186	0.209218	0.48842	0.625253	0.999862
YKR022C	368.559	-0.0618563	0.109438	-0.565217	0.571926	0.999862
YLR287C	272.158	0.0823242	0.195484	0.42113	0.67366	0.999862
YPL174C	241.601	-0.0440312	0.250637	-0.175677	0.860547	0.999862
YOR070C	681.859	-0.136821	0.100869	-1.35642	0.174966	0.999862
YDR403W	78.0363	0.00482457	0.213174	0.0226321	0.981944	0.999862
YOL093W	245.686	-0.0432479	0.150863	-0.28667	0.774365	0.999862
YOL042W	393.767	-0.106319	0.134039	-0.793193	0.427665	0.999862
YIL070C	1461.14	0.15397	0.0954203	1.6136	0.106615	0.999862
YCL037C	10.3328	0.00534941	0.581392	0.00920104	0.992659	0.999862
YIL025C	4.09133	0.107349	0.848699	0.126487	0.899346	0.999862
YDR545C-A	44.8454	0.264284	1.64994	0.160178	0.872741	0.999862
YNR071C	90.8778	-0.311514	0.304105	-1.02436	0.305664	0.999862
YML131W	1649.13	0.100127	0.133708	0.748853	0.453946	0.999862
YNL245C	208.285	-0.27511	0.182709	-1.50573	0.132136	0.999862
YNR024W	251.598	-0.0159476	0.146452	-0.108893	0.913287	0.999862
YFL013W-A	2.79528	0.483443	0.954946	0.506252	0.61268	NA
YLR329W	12.7532	0.543154	0.478144	1.13596	0.255972	0.999862
YPL043W	823.885	0.123694	0.13086	0.945237	0.344538	0.999862
YCL045C	1660.64	0.0634316	0.0747112	0.849023	0.395869	0.999862
YKL002W	1100.73	-0.0454697	0.122906	-0.369955	0.711416	0.999862
YDR328C	1236.61	-0.0433276	0.111	-0.390339	0.696286	0.999862
YIR009W	81.474	0.0728369	0.20607	0.353457	0.723746	0.999862
YBR154C	733.523	-0.0250849	0.118382	-0.211898	0.832187	0.999862
YLR001C	664.383	0.0525063	0.153204	0.34272	0.731809	0.999862
YKR101W	206.488	-0.0963411	0.142239	-0.677316	0.498205	0.999862
YMR230W-A	2.40798	-0.0137922	1.15496	-0.0119417	0.990472	NA
YER115C	220.327	-0.164087	0.151523	-1.08292	0.278844	0.999862
YHR124W	39.4452	-0.416352	0.245007	-1.69935	0.0892538	0.999862
YER148W	824.413	-0.121989	0.0780445	-1.56307	0.118036	0.999862
YMR240C	292.886	0.0519822	0.120988	0.429648	0.667452	0.999862
YOR303W	4767.73	0.299693	0.0981631	3.05301	0.00226555	0.0984522
YIL087C	458.271	-0.0604683	0.156124	-0.38731	0.698527	0.999862
YMR192W	403.194	0.23043	0.167419	1.37637	0.168707	0.999862
YJL221C	820.854	-0.134067	0.0842552	-1.5912	0.111565	0.999862
YMR229C	1113.22	-0.10624	0.175884	-0.604031	0.545823	0.999862
YLL038C	127.379	0.00442206	0.17878	0.0247346	0.980267	0.999862
YOR056C	735.355	0.00655294	0.0955352	0.0685919	0.945314	0.999862
YOL108C	254.949	0.0928587	0.126818	0.732223	0.464033	0.999862
YOR270C	3235.47	0.00493244	0.094267	0.0523241	0.95827	0.999862
YDR106W	20.2926	-0.227175	0.336724	-0.674661	0.499891	0.999862
YOL068C	944.913	-0.0640759	0.0982496	-0.652175	0.514288	0.999862
YMR182C	320.083	0.0672478	0.128031	0.525245	0.599413	0.999862
YBR201W	240.897	-0.0574549	0.146716	-0.391606	0.69535	0.999862
YLL043W	1435.81	-0.0658532	0.0612333	-1.07545	0.282175	0.999862
YDR415C	353.177	-0.0225785	0.114157	-0.197784	0.843214	0.999862
YGL161C	841.496	0.0154074	0.0977302	0.157652	0.874731	0.999862
YOL133W	225.419	0.0529432	0.159951	0.330997	0.740647	0.999862
YDL074C	774.291	-0.0431411	0.160651	-0.268539	0.788284	0.999862
YNL263C	691.173	-0.0804718	0.0941036	-0.85514	0.392474	0.999862
YHR217C	5.49091	1.10508	0.797043	1.38648	0.165601	0.999862
YDR128W	626.303	0.0630412	0.0895373	0.704078	0.481384	0.999862
YOR193W	147.82	-0.00100914	0.212739	-0.00474358	0.996215	0.999862
YER028C	117.398	-0.362238	0.173977	-2.08211	0.0373329	0.658316
YMR052W	89.3896	0.0794695	0.182151	0.436283	0.662632	0.999862
YMR294W-A	2.69515	-0.116363	1.05616	-0.110175	0.912271	NA
YKR076W	852.235	-0.00230236	0.136203	-0.0169039	0.986513	0.999862
YDR225W	3097.37	-0.155142	0.147339	-1.05296	0.29236	0.999862
YDR270W	620.255	-0.283536	0.0929308	-3.05105	0.00228043	0.0984522
YPR033C	1958.36	-0.0109816	0.0655244	-0.167596	0.866901	0.999862
YGR230W	287.759	0.425786	0.125939	3.38088	0.000722538	0.0401477
YPR062W	837.919	-0.0822762	0.139996	-0.587706	0.55673	0.999862
YDR528W	462.621	-0.0846405	0.102726	-0.823948	0.409969	0.999862
YER173W	301.799	0.0713433	0.103712	0.687897	0.491517	0.999862
YBR026C	1736.6	0.0582353	0.0661306	0.880611	0.378529	0.999862
YDL185W	4574.39	0.017807	0.110934	0.160519	0.872472	0.999862
YBR091C	116.729	0.0262729	0.199113	0.13195	0.895024	0.999862
YNL094W	726.677	0.0146889	0.100838	0.145669	0.884183	0.999862
YGL056C	1773.59	-0.132788	0.0954349	-1.3914	0.164104	0.999862
YPL227C	372.005	0.149902	0.119831	1.25095	0.210955	0.999862
YLR222C-A	9.38863	0.601067	0.636878	0.94377	0.345287	0.999862
YDL010W	579.195	-0.00581805	0.0794793	-0.073202	0.941645	0.999862
YML019W	329.396	-0.234576	0.150503	-1.55861	0.119088	0.999862
YDL045C	551.796	-0.00452863	0.09335	-0.0485124	0.961308	0.999862
YLR163C	904.586	0.274055	0.0896676	3.05634	0.00224055	0.0981428
YLR178C	1307.01	0.188603	0.167223	1.12785	0.259382	0.999862
YBL079W	663.842	-0.0380236	0.192971	-0.197043	0.843794	0.999862
YNL056W	334.814	0.339095	0.182895	1.85404	0.0637336	0.857545
YFL001W	279.9	0.238907	0.121473	1.96675	0.0492125	0.776694
YDR150W	1589.86	-0.0857241	0.0883042	-0.970781	0.331657	0.999862
YER147C-A	5.15923	0.390054	0.852174	0.457716	0.647156	0.999862
YKL170W	508.762	0.00415999	0.108559	0.0383201	0.969432	0.999862
YPR157W	167.103	0.105429	0.134564	0.783487	0.433341	0.999862
YPR137C-B	61.2068	2.29987	3.23062	0.7119	0.476527	0.999862
YLR384C	1089.91	-0.0280127	0.122165	-0.229302	0.818634	0.999862
YPL060W	180.796	0.023345	0.136028	0.171619	0.863737	0.999862
YML099C	352.323	-0.113841	0.143802	-0.791653	0.428563	0.999862
YLR421C	586.27	0.0599767	0.082637	0.725784	0.467971	0.999862
YLR090W	698.711	0.104547	0.107936	0.968599	0.332745	0.999862
YJR064W	1403.37	-0.0776348	0.0684271	-1.13456	0.256559	0.999862
YML022W	743.642	-0.0981618	0.111855	-0.87758	0.380171	0.999862
YER046W	240.608	-0.24461	0.148409	-1.64822	0.0993079	0.999862
YMR029C	754.798	-0.125709	0.126311	-0.995231	0.319624	0.999862
YIR030C	23.3147	0.203911	0.32059	0.636049	0.524744	0.999862
YKR050W	368.434	0.0518744	0.111682	0.464482	0.642303	0.999862
YMR121C	323.433	0.0741508	0.13561	0.546795	0.58452	0.999862
YGL017W	227.817	0.104101	0.132032	0.788455	0.43043	0.999862
YDL150W	492.929	-0.0607224	0.1118	-0.543136	0.587036	0.999862
YNL038W	232.879	-0.223114	0.273375	-0.816147	0.414416	0.999862
YHR001W-A	1913.14	-0.508534	0.115675	-4.39621	1.10156e-05	0.00122416
YOL165C	7.75067	2.52241	0.70525	3.57662	0.000348067	0.0219868
YIL139C	139.761	-0.292189	0.19038	-1.53476	0.124842	0.999862
YLR246W	482.967	0.0966343	0.0913422	1.05794	0.290084	0.999862
YJR119C	277.248	-0.0473244	0.146839	-0.322287	0.747235	0.999862
YLR359W	1409.03	0.172349	0.0782464	2.20265	0.0276195	0.568811
YLR199C	415.611	0.127887	0.124708	1.02549	0.305133	0.999862
YJL206C	241.138	0.0656182	0.12633	0.519421	0.603467	0.999862
YIL142W	1519.39	-0.0393607	0.0729971	-0.539209	0.589743	0.999862
YGL082W	642.183	-0.151266	0.0868058	-1.74258	0.0814079	0.965256
YNL138W	1735.43	0.0235961	0.0863376	0.2733	0.784623	0.999862
YOR133W	2770.36	0.0121803	0.122811	0.0991792	0.920996	0.999862
21S_rRNA	78.0912	-0.299429	0.374161	-0.800267	0.423556	0.999862
YGL142C	431.181	-0.0356955	0.131467	-0.271517	0.785994	0.999862
YGR179C	296.352	-0.0922193	0.12721	-0.724938	0.46849	0.999862
YGR102C	375.164	0.0895445	0.141385	0.633336	0.526514	0.999862
YBR139W	1829.2	0.158736	0.108094	1.4685	0.141967	0.999862
YHR188C	1231.2	-0.0554901	0.073794	-0.75196	0.452075	0.999862
YKL106C-A	1.22975	-2.85711	1.89538	-1.5074	0.131707	NA
YNL116W	426.157	0.0214867	0.108435	0.198153	0.842925	0.999862
YNL139C	440.036	0.153424	0.176424	0.869632	0.384501	0.999862
YDR361C	406.975	-0.076036	0.128889	-0.589935	0.555234	0.999862
YGL255W	798.982	-0.0635326	0.223907	-0.283745	0.776606	0.999862
YFR007W	300.766	0.0112505	0.117197	0.0959966	0.923523	0.999862
YLR333C	1202.74	0.0721057	0.12698	0.567852	0.570135	0.999862
YHR103W	839.736	0.00512241	0.10572	0.0484527	0.961355	0.999862
YHL030W	462.454	0.115916	0.166752	0.695137	0.48697	0.999862
YGL077C	1453.39	-0.219008	0.132575	-1.65195	0.0985444	0.999862
YPL204W	1678.87	0.0263852	0.0639842	0.412371	0.680068	0.999862
YIL009C-A	86.957	0.0445703	0.184158	0.242022	0.808763	0.999862
YOR091W	499.237	0.113966	0.142991	0.797014	0.425443	0.999862
YGR026W	1048.29	-0.000805691	0.190481	-0.00422976	0.996625	0.999862
YAL040C	1407.95	0.0846154	0.103112	0.820615	0.411865	0.999862
YDR288W	267.722	0.00923923	0.118581	0.0779148	0.937896	0.999862
YGL208W	527.235	0.242774	0.12005	2.02227	0.0431484	0.710553
YNL284C	852.326	0.133424	0.0843522	1.58175	0.113707	0.999862
YIL164C	166.87	0.100279	0.145738	0.688074	0.491406	0.999862
YOL143C	3592.84	0.0913855	0.11579	0.789232	0.429976	0.999862
YBR237W	748.604	-0.0481239	0.0926427	-0.519457	0.603442	0.999862
YBR197C	170.28	0.00230864	0.201765	0.0114422	0.990871	0.999862
YHR147C	760.664	0.108823	0.11811	0.921369	0.356858	0.999862
YJL093C	756.585	0.061788	0.0793772	0.77841	0.436327	0.999862
YPL126W	1019.77	-0.000888875	0.141789	-0.006269	0.994998	0.999862
YMR317W	16.5244	0.245222	0.454441	0.539612	0.589465	0.999862
YOR251C	631.584	-0.0977199	0.119705	-0.81634	0.414306	0.999862
YPR181C	2286.46	0.0199331	0.0805526	0.247455	0.804556	0.999862
YCL008C	308.122	0.0991927	0.146123	0.678833	0.497244	0.999862
YOR107W	341.233	0.36445	0.162683	2.24025	0.0250745	0.541266
YML005W	230.024	-0.0531066	0.128815	-0.41227	0.680141	0.999862
YNL215W	523.016	-0.0646441	0.116204	-0.556297	0.578008	0.999862
YCR075W-A	142.718	0.129243	0.200728	0.643869	0.51966	0.999862
YDL059C	66.4089	0.282759	0.19888	1.42176	0.155097	0.999862
YOR204W	674.742	0.101566	0.114476	0.887222	0.374959	0.999862
YEL012W	1405.58	-0.102946	0.132295	-0.778152	0.43648	0.999862
YBL040C	482.617	-0.126087	0.193004	-0.653284	0.513573	0.999862
YPR043W	3555.09	-0.122563	0.151093	-0.81118	0.417262	0.999862
YDR382W	3176.42	-0.0791669	0.120755	-0.655597	0.512083	0.999862
YDR483W	2369.22	0.0625951	0.0613425	1.02042	0.30753	0.999862
YER061C	244.01	-0.00782417	0.153168	-0.0510824	0.95926	0.999862
YLR022C	207.039	-0.0232349	0.120398	-0.192984	0.846972	0.999862
YLR402W	53.5843	-0.166879	0.250751	-0.665515	0.505721	0.999862
YLR073C	124.635	-0.0958109	0.178183	-0.53771	0.590777	0.999862
YER183C	186.69	-0.0137138	0.160594	-0.0853939	0.931948	0.999862
YHR090C	347.353	0.0572776	0.11889	0.48177	0.629969	0.999862
YOL021C	1009.1	-0.0274549	0.0951411	-0.28857	0.77291	0.999862
YHR030C	782.391	0.0816432	0.0800593	1.01978	0.307831	0.999862
YBR295W	235.793	0.138885	0.110117	1.26126	0.207216	0.999862
YKL018W	212.758	0.189722	0.137069	1.38413	0.166318	0.999862
YIL011W	57.539	0.239054	0.295572	0.808787	0.418638	0.999862
YEL034W	11032.7	-0.0920243	0.137831	-0.667658	0.504352	0.999862
YHL015W	4132.48	-0.0279445	0.117497	-0.237832	0.812012	0.999862
YNR050C	624.681	-0.17583	0.23924	-0.73495	0.46237	0.999862
YDR134C	3235.57	0.00761905	0.0970321	0.078521	0.937414	0.999862
YKL208W	202.796	0.05798	0.142577	0.406657	0.68426	0.999862
YGR004W	167.812	-0.211234	0.131157	-1.61054	0.10728	0.999862
YML110C	2140.98	0.145198	0.111579	1.3013	0.193154	0.999862
YGL048C	1939.19	0.0010617	0.0923935	0.011491	0.990832	0.999862
YGL243W	211.012	0.0581178	0.132695	0.437981	0.6614	0.999862
YKL106W	279.658	0.0621376	0.129182	0.481007	0.630512	0.999862
tN(GUU)N1	2.76205	-1.09353	1.2333	-0.886666	0.375259	NA
YPR029C	791.699	0.0113944	0.184972	0.0616007	0.950881	0.999862
YJL034W	6023.78	0.00787313	0.0869658	0.0905314	0.927865	0.999862
YFL048C	983.642	0.130132	0.0734944	1.77064	0.0766208	0.934624
YLR117C	733.582	-0.0605007	0.110252	-0.548749	0.583178	0.999862
YOR176W	1315.99	-0.0703989	0.0908767	-0.774664	0.438538	0.999862
YOR109W	681.565	0.0218296	0.120649	0.180934	0.856419	0.999862
YBL089W	223.858	0.0253799	0.115271	0.220175	0.825735	0.999862
YDL084W	2815.45	-0.149775	0.104755	-1.42977	0.152783	0.999862
YGL116W	773.163	0.551047	0.0942186	5.8486	4.95729e-09	1.19667e-06
YNR034W-A	2661.95	-0.24423	0.16902	-1.44497	0.148465	0.999862
YCR024C	257.703	0.152717	0.173015	0.88268	0.377409	0.999862
YIL102C-A	79.1923	-0.233519	0.206626	-1.13015	0.258411	0.999862
YMR102C	785.129	-0.167937	0.109065	-1.53979	0.123613	0.999862
YCR071C	463.19	0.12676	0.133133	0.952132	0.34103	0.999862
YDR175C	794.569	0.190571	0.0844993	2.2553	0.0241147	0.532031
YOR189W	261.756	0.0379004	0.157952	0.239948	0.81037	0.999862
YOR154W	377.503	-0.0749177	0.193767	-0.386638	0.699024	0.999862
YPR121W	383.039	0.000748495	0.132497	0.00564913	0.995493	0.999862
YBR070C	306.38	0.204255	0.121706	1.67826	0.0932955	0.999862
YOR396C-A	12.7377	1.3187	3.24153	0.406813	NA	NA
YLL017W	9.20958	0.857864	0.536616	1.59865	0.109897	0.999862
YDR351W	675.939	0.0841551	0.124122	0.678002	0.497771	0.999862
YNL315C	1027.23	0.0606279	0.088577	0.684465	0.493681	0.999862
YPR174C	303.213	-0.0467737	0.132749	-0.352346	0.724579	0.999862
YJR045C	13439	0.0547493	0.0962222	0.568988	0.569364	0.999862
YMR008C	1728.95	0.0311992	0.101229	0.308205	0.757927	0.999862
YDR349C	1132.29	0.128235	0.0771667	1.66179	0.0965554	0.999862
YDL171C	2312.94	0.0745316	0.160846	0.463371	0.643098	0.999862
YKL062W	1198.89	0.0964517	0.135006	0.714425	0.474965	0.999862
YJR010W	218.323	-0.122125	0.122281	-0.998725	0.317928	0.999862
YJL218W	103.455	0.185276	0.174799	1.05994	0.289173	0.999862
YIL126W	856.014	-0.0653749	0.0875888	-0.746385	0.455435	0.999862
YDR093W	844.07	-0.0987243	0.102281	-0.965223	0.334433	0.999862
YMR282C	587.089	-0.146186	0.112951	-1.29425	0.195581	0.999862
YIL109C	2032.97	0.071511	0.0950879	0.752051	0.45202	0.999862
YFL022C	2069.98	0.0210148	0.0874844	0.240212	0.810166	0.999862
YPL109C	400.413	-0.101615	0.103232	-0.984342	0.324947	0.999862
YJL156C	449.105	-0.0529817	0.143271	-0.369801	0.711531	0.999862
YNL071W	4090.58	0.024365	0.138913	0.175398	0.860767	0.999862
YMR088C	618.659	-0.177998	0.0978683	-1.81875	0.0689502	0.897549
YGR211W	1296.35	0.0874095	0.0889221	0.98299	0.325613	0.999862
YKL139W	332.507	-0.10453	0.166575	-0.627524	0.530316	0.999862
YJL069C	449.208	0.0298194	0.157537	0.189285	0.849869	0.999862
YDR323C	152.048	0.0298729	0.180853	0.165178	0.868804	0.999862
YDR344C	8.15312	-0.148332	0.61841	-0.239859	0.810439	0.999862
YJL016W	505.238	-0.0505642	0.15516	-0.325885	0.744511	0.999862
YDR444W	626.69	-0.0361142	0.0835348	-0.432325	0.665505	0.999862
YPL189W	66.8006	0.0875468	0.257432	0.340078	0.733798	0.999862
YLR285W	416.921	-0.00134347	0.109802	-0.0122354	0.990238	0.999862
YLR267W	200.848	0.198843	0.218239	0.911125	0.36223	0.999862
YDL219W	155.456	-0.267134	0.252896	-1.0563	0.290832	0.999862
YNL017C	4.22501	0.793496	0.7943	0.998988	0.317801	0.999862
YCR024C-A	892.815	0.121581	0.389487	0.312157	0.754921	0.999862
YCR024C-B	1247.44	-0.0863377	0.566872	-0.152306	0.878946	0.999862
YKR024C	472.642	-0.0281941	0.107978	-0.261109	0.794009	0.999862
YBR156C	316.471	0.144575	0.113992	1.26828	0.204696	0.999862
YOR076C	267.797	0.0278296	0.21345	0.13038	0.896266	0.999862
YEL059C-A	194.209	0.188931	0.158794	1.18978	0.234132	0.999862
YDR405W	963.869	0.0620145	0.159305	0.389281	0.697068	0.999862
YOL091W	38.8579	-0.0767151	0.316909	-0.242072	0.808724	0.999862
YCL031C	707.43	-0.089805	0.160909	-0.558112	0.576768	0.999862
YIL027C	248.754	-0.185454	0.237054	-0.782331	0.43402	0.999862
YLR459W	369.529	0.122555	0.244185	0.501894	0.615742	0.999862
YNL243W	1804.74	-0.0852068	0.100368	-0.84894	0.395915	0.999862
YNR026C	397.766	-0.0566849	0.102793	-0.551446	0.581328	0.999862
YHL044W	156.881	0.466899	0.137927	3.38512	0.000711469	0.0401477
YPR204W	3629.13	-0.0569608	0.0729747	-0.780556	0.435064	0.999862
YNL297C	485.571	-0.0287206	0.267142	-0.107511	0.914384	0.999862
YBR170C	467.975	0.0942774	0.10474	0.900108	0.368063	0.999862
YGR149W	535.373	0.0346752	0.247837	0.139912	0.88873	0.999862
YDR458C	890.654	-0.0673788	0.134924	-0.499382	0.61751	0.999862
YKL193C	634.44	0.0212585	0.120552	0.176343	0.860025	0.999862
YPR099C	5.37472	0.286855	0.815771	0.351636	0.725111	0.999862
YOR135C	1.92155	-1.27976	1.19055	-1.07494	0.282403	NA
YLR310C	1276.22	-0.0460607	0.195218	-0.235944	0.813476	0.999862
YNR008W	430.743	0.079614	0.0875609	0.909241	0.363223	0.999862
YBR301W	5.94272	1.80895	0.89575	2.01948	0.0434372	0.712204
YLR003C	284.033	0.155062	0.176287	0.879604	0.379074	0.999862
YER113C	498.175	-0.0472129	0.121333	-0.389119	0.697188	0.999862
YHR122W	368.642	-0.112414	0.123265	-0.911971	0.361784	0.999862
YHL017W	365.47	0.0259215	0.174493	0.148553	0.881906	0.999862
YJR010C-A	115.614	0.0531299	0.171871	0.309127	0.757225	0.999862
YIL085C	724.929	-0.00646732	0.103838	-0.0622827	0.950338	0.999862
YMR190C	428.471	0.0730691	0.105953	0.689639	0.490422	0.999862
YLR325C	2651.11	0.00170919	0.117011	0.0146071	0.988346	0.999862
YOR272W	607.378	-0.0221445	0.112427	-0.196967	0.843853	0.999862
YOR058C	508.703	0.378558	0.117402	3.22446	0.0012621	0.0605909
YAL064W-B	27.2082	-0.116577	0.308803	-0.377514	0.705792	0.999862
YDR413C	2.25452	-0.582174	1.03673	-0.561551	0.574422	NA
YBR203W	774.693	0.196346	0.2145	0.915367	0.359999	0.999862
YAR029W	9.85008	0.100508	0.550604	0.182542	0.855157	0.999862
YNL238W	1089.03	-0.00317688	0.0721823	-0.0440119	0.964895	0.999862
YJL198W	524.571	0.0257789	0.1462	0.176326	0.860038	0.999862
YOL135C	166.091	0.00622575	0.173986	0.0357831	0.971455	0.999862
YOR323C	948.515	-0.130685	0.0925361	-1.41226	0.157875	0.999862
YLL041C	6714.86	-0.412413	0.10348	-3.98545	6.73529e-05	0.00524916
YKR074W	470.271	-0.157239	0.0967124	-1.62584	0.103984	0.999862
YMR274C	122.05	-0.0929082	0.179412	-0.517847	0.604565	0.999862
YER026C	3163.79	-0.0622452	0.0927083	-0.671409	0.50196	0.999862
YMR201C	305.873	-0.0881394	0.12581	-0.700576	0.483568	0.999862
YLR069C	1618.95	0.176513	0.082568	2.13779	0.0325336	0.618779
YML042W	1282.74	0.358919	0.252574	1.42104	0.155304	0.999862
YMR050C	147.822	-0.188529	0.738161	-0.255403	0.798412	0.999862
YDR069C	376.532	-0.0308611	0.168484	-0.18317	0.854665	0.999862
YOR298W	27.4633	0.631876	0.301947	2.09267	0.0363787	0.653619
YEL066W	403.342	0.0503962	0.186742	0.26987	0.78726	0.999862
YPR035W	6504.13	0.0688513	0.0873201	0.788493	0.430409	0.999862
YDR014W	128.104	-0.135823	0.260595	-0.521204	0.602225	0.999862
YDR227W	620.327	0.0108262	0.168321	0.0643188	0.948716	0.999862
YPR060C	174.708	-0.014714	0.162703	-0.0904343	0.927942	0.999862
YMR037C	1067.17	-0.0759543	0.119646	-0.634826	0.525542	0.999862
YCR038C	147.783	0.140389	0.178755	0.78537	0.432236	0.999862
YNL257C	593.021	-0.0810334	0.169615	-0.47775	0.632828	0.999862
YCR072C	383.297	0.0294061	0.168039	0.174996	0.861083	0.999862
YBR093C	350.982	0.0860576	0.120001	0.71714	0.473288	0.999862
YNL092W	84.3492	-0.206239	0.195004	-1.05761	0.290231	0.999862
YGR045C	32.3606	-0.649251	0.268251	-2.42031	0.0155071	0.409947
YAL037C-B	14.7136	0.0370016	0.875008	0.0422872	0.96627	0.999862
YLR134W	248.345	-0.0111564	0.140125	-0.0796179	0.936541	0.999862
YMR203W	2313.04	0.106207	0.0931726	1.1399	0.25433	0.999862
YKL096C-B	7.64088	0.0414448	0.60843	0.0681177	0.945692	0.999862
YPL225W	1238.53	-0.142416	0.116147	-1.22617	0.220136	0.999862
YPL270W	1059.85	-0.0652692	0.0752761	-0.867064	0.385907	0.999862
YDL012C	338.951	0.0299299	0.125328	0.238814	0.81125	0.999862
YDR218C	3.73142	0.789692	0.908146	0.869565	0.384538	0.999862
YLR299W	1565.64	0.0266826	0.097402	0.273943	0.784128	0.999862
YFL003C	25.2568	0.115764	0.327616	0.353354	0.723823	0.999862
YPL051W	242.16	0.208485	0.122747	1.69849	0.0894146	0.999862
YNL054W	525.162	-0.0671117	0.10942	-0.61334	0.539652	0.999862
YDR156W	265.613	0.010262	0.14936	0.0687064	0.945223	0.999862
YPL062W	1.19551	-0.319422	1.57039	-0.203404	0.83882	NA
YPR155C	585.936	-0.0783274	0.141218	-0.554657	0.579129	0.999862
YOR137C	295.91	-0.00932968	0.153992	-0.0605854	0.951689	0.999862
YKL123W	87.3592	-0.141809	0.206262	-0.68752	0.491755	0.999862
YKL172W	1247.35	-0.0860787	0.118652	-0.725473	0.468162	0.999862
YNL336W	933.18	0.189263	0.120113	1.5757	0.115095	0.999862
YDR305C	250.031	-0.0575305	0.113064	-0.508832	0.61087	0.999862
YJL057C	444.348	0.014802	0.123566	0.11979	0.90465	0.999862
YPR100W	968.174	-0.0614539	0.11193	-0.549039	0.582978	0.999862
YDR358W	699.772	0.0369254	0.139324	0.265033	0.790984	0.999862
YJL152W	5.25746	0.204397	0.722491	0.282905	0.777249	0.999862
YLR096W	771.375	0.0821355	0.0996947	0.82387	0.410013	0.999862
YKR052C	204.505	-0.267665	0.136807	-1.95651	0.050405	0.776694
YLR427W	796.803	-0.0019594	0.0853311	-0.0229623	0.98168	0.999862
YDL152W	1.53495	1.15296	1.53377	0.751719	0.45222	NA
YGL015C	2.13806	1.25933	1.17571	1.07112	0.284116	NA
YEL064C	236.8	0.217773	0.143479	1.51781	0.129063	0.999862
YMR127C	188.234	-0.140613	0.134871	-1.04257	0.297146	0.999862
YIL140W	1251.94	-0.0556795	0.103091	-0.540101	0.589128	0.999862
YOL163W	39.0256	0.537556	0.258156	2.08229	0.0373158	0.658316
YLR197W	1928.02	-0.0265991	0.151673	-0.175372	0.860788	0.999862
YBR213W	107.267	-0.209735	0.179383	-1.1692	0.242323	0.999862
YAL064W	1.67838	0.0951751	1.45099	0.0655931	0.947702	NA
YJL204C	199.669	-0.0372871	0.23759	-0.156939	0.875293	0.999862
YLR244C	860.015	0.154447	0.0914536	1.6888	0.0912573	0.999862
YJR084W	326.017	-0.0671064	0.121752	-0.551174	0.581515	0.999862
YLR233C	240.044	-0.0262046	0.215378	-0.121668	0.903162	0.999862
YDL238C	210.655	0.0983982	0.137297	0.716681	0.473571	0.999862
YGL084C	678.268	-0.076188	0.15111	-0.504189	0.614129	0.999862
YLR382C	965.225	0.102939	0.0902717	1.14033	0.25415	0.999862
YLR154C-H	3.05274	0.612613	0.910969	0.672485	0.501275	0.999862
YLR154C-G	163.96	0.674614	0.253425	2.66199	0.00776808	0.242793
YGR238C	385.622	-0.101726	0.160703	-0.633006	0.52673	0.999862
YDR363W	307.592	0.0503451	0.109933	0.45796	0.646981	0.999862
YNL114C	13.1503	0.246246	0.50592	0.48673	0.62645	0.999862
YNL163C	822.681	0.0327329	0.0728014	0.449618	0.652986	0.999862
snR55	1.57913	0.0113375	1.55448	0.00729344	0.994181	NA
snR57	6.62376	0.363664	0.968946	0.375319	0.707423	0.999862
YHR009C	1008.41	0.0267492	0.122268	0.218775	0.826825	0.999862
snR50	7.75533	0.867404	0.5446	1.59274	0.111219	0.999862
YFR050C	1419.04	0.0425339	0.0914798	0.464954	0.641964	0.999862
YNR069C	219.907	-0.0497766	0.12945	-0.384525	0.700589	0.999862
YOL058W	3150.17	-0.096356	0.11049	-0.872076	0.383167	0.999862
YAR019C	302.356	-0.0270965	0.169344	-0.160009	0.872874	0.999862
YML129C	608.971	0.126464	0.140897	0.897559	0.369421	0.999862
YGL257C	529.238	0.0712951	0.163169	0.436939	0.662155	0.999862
YGR020C	1476.75	-0.0304709	0.0940855	-0.323864	0.746041	0.999862
YOR093C	551.216	0.0327723	0.174164	0.18817	0.850744	0.999862
YAL046C	286.961	-0.0250707	0.166612	-0.150474	0.880391	0.999862
YOR392W	10.4034	0.582833	0.569696	1.02306	0.306279	0.999862
YAL039C	1144.16	0.268626	0.128905	2.0839	0.037169	0.658316
YGR100W	745.828	-0.108121	0.115475	-0.936313	0.349112	0.999862
YLR403W	872.601	0.0169974	0.0951353	0.178665	0.8582	0.999862
YOL118C	4.42921	0.0751507	0.7195	0.104448	0.916813	0.999862
YDR286C	141.101	0.0049508	0.145104	0.0341189	0.972782	0.999862
YHR141C	3739.16	-0.0944071	0.141024	-0.66944	0.503215	0.999862
YPL128C	399.814	-0.0677604	0.123285	-0.549624	0.582577	0.999862
YJL091C	208.184	0.025098	0.272513	0.0920983	0.92662	0.999862
YBR191W	3352.12	-0.072356	0.130802	-0.553173	0.580145	0.999862
YDR380W	5677.68	0.0839441	0.122956	0.682718	0.494785	0.999862
YGR191W	866.067	0.0706068	0.085259	0.828145	0.407588	0.999862
YGR047C	607.917	0.087729	0.101507	0.864263	0.387443	0.999862
YDR485C	725.757	0.0988693	0.0784854	1.25972	0.207772	0.999862
YPL239W	468.89	-0.0278496	0.123171	-0.226106	0.821119	0.999862
YPR183W	1220.82	0.0728499	0.134441	0.541875	0.587905	0.999862
YOR206W	1075	-0.0960533	0.189535	-0.506784	0.612307	0.999862
YEL049W	50.7507	0.712914	0.364098	1.95803	0.0502268	0.776694
YOR391C	189.064	0.458548	0.251104	1.82613	0.0678313	0.88917
YDR525W-A	285.561	0.0839171	0.232767	0.36052	0.718458	0.999862
YBR089W	2.09165	0.68655	1.20995	0.567422	0.570428	NA
YLR075W	10759	-0.0123808	0.140502	-0.0881182	0.929783	0.999862
YBR054W	4305.62	0.0749145	0.177411	0.422266	0.672831	0.999862
YLR020C	457.947	0.052642	0.125577	0.4192	0.67507	0.999862
YNL217W	496.332	-0.24512	0.114979	-2.13186	0.0330182	0.619885
YLR404W	124.876	-0.0396191	0.187474	-0.211331	0.832629	0.999862
YIL013C	224.462	-0.117065	0.129974	-0.900682	0.367757	0.999862
YPL206C	795.207	-0.00973095	0.0899173	-0.108221	0.91382	0.999862
YDL060W	739.48	0.011918	0.0965681	0.123416	0.901778	0.999862
YBR293W	345.759	0.056849	0.138036	0.411843	0.680455	0.999862
YNR052C	787.709	0.0216319	0.0899218	0.240563	0.809894	0.999862
YHR032W	757.688	0.128788	0.100452	1.28209	0.199812	0.999862
YEL032W	1069.21	0.0265798	0.100664	0.264045	0.791746	0.999862
YOL076W	352.652	-0.254525	0.221655	-1.14829	0.250847	0.999862
YDR136C	1.10247	-0.60786	1.59365	-0.381427	0.702886	NA
YHR203C	4676.95	-0.0237258	0.120275	-0.197262	0.843622	0.999862
YML112W	236.133	0.0340525	0.12852	0.264959	0.791041	0.999862
YLR154W-C	5.96408	0.970178	0.728089	1.3325	0.182696	0.999862
YGL241W	315.201	-0.161695	0.171813	-0.941106	0.346651	0.999862
YPR176C	388.647	0.00534786	0.127635	0.0418997	0.966579	0.999862
YDR057W	529.24	-0.0237269	0.120791	-0.19643	0.844274	0.999862
YJL036W	775.228	-0.0229785	0.0847945	-0.270991	0.786398	0.999862
YER009W	1222.44	0.00715126	0.110592	0.0646636	0.948442	0.999862
YLR115W	508.404	0.0883244	0.109609	0.805817	0.420349	0.999862
YLR140W	1.28221	0.712895	1.59338	0.447412	0.654578	NA
YGL114W	739.199	-0.0604879	0.0735597	-0.822296	0.410909	0.999862
YER167W	630.238	0.0734915	0.102599	0.716302	0.473805	0.999862
YMR104C	1328.17	0.149592	0.133342	1.12187	0.261917	0.999862
YER185W	18.1914	-0.0363768	0.419633	-0.0866872	0.93092	0.999862
YDL195W	2471.13	-0.0465747	0.126846	-0.367175	0.713488	0.999862
YNL199C	584.385	-0.00253009	0.0971959	-0.0260308	0.979233	0.999862
YCR026C	924.241	0.0757248	0.0825108	0.917756	0.358747	0.999862
YBL052C	484.726	-0.0589388	0.155596	-0.378793	0.704842	0.999862
YBR076W	4.06925	1.39784	0.952669	1.46729	0.142297	0.999862
YNL317W	332.866	-0.02526	0.120872	-0.208982	0.834462	0.999862
YLL019C	1785.12	-0.135127	0.137582	-0.98216	0.326021	0.999862
YOR156C	236.147	0.018915	0.12349	0.15317	0.878264	0.999862
YHR052W	795.375	-0.100931	0.165047	-0.611529	0.540849	0.999862
YKR026C	382.763	-0.0689654	0.0989739	-0.696804	0.485926	0.999862
YJR043C	301.227	-0.0645903	0.107382	-0.6015	0.547507	0.999862
YJR012C	142.147	-0.0511717	0.153451	-0.333473	0.738777	0.999862
YKL060C	43269.5	-0.157173	0.151341	-1.03853	0.299023	0.999862
YCR044C	434.888	-0.0609796	0.110204	-0.553333	0.580036	0.999862
YKL035W	2778.92	0.0580494	0.135539	0.428286	0.668443	0.999862
YLR264C-A	1.18259	0.0532673	1.41156	0.0377366	0.969898	NA
YNL073W	2128.3	0.0296091	0.0883254	0.335228	0.737453	0.999862
YMR280C	822.731	-0.431674	0.135274	-3.1911	0.00141731	0.0675022
YFL020C	33.3218	-0.0601228	0.348181	-0.172677	0.862905	0.999862
YNL328C	36.9209	0.187521	0.313422	0.598304	0.549637	0.999862
YJL014W	1591.09	-0.0402891	0.0686687	-0.586717	0.557394	0.999862
YMR031C	3820.31	-0.0743709	0.131632	-0.564992	0.572079	0.999862
YOR174W	310.694	-0.155318	0.107569	-1.44389	0.14877	0.999862
YPR149W	6726.09	-0.0115985	0.105056	-0.110403	0.91209	0.999862
YNL015W	3062.74	-0.335873	0.116511	-2.88275	0.00394215	0.143375
YCR084C	1856.32	-0.0588789	0.0800421	-0.735599	0.461975	0.999862
YHR178W	379.913	-0.0877712	0.106482	-0.824283	0.409779	0.999862
YDR260C	219.664	0.0692737	0.133738	0.517982	0.604471	0.999862
YLR283W	278.218	-0.00704097	0.145311	-0.0484544	0.961354	0.999862
YPL170W	615.853	0.0339648	0.116579	0.291345	0.770787	0.999862
YPR001W	235.983	0.201021	0.274042	0.73354	0.463229	0.999862
YDR204W	449.454	0.0540712	0.110693	0.48848	0.62521	0.999862
YBR085C-A	1001.81	0.449635	0.0981374	4.58169	4.61243e-06	0.000615093
YDR251W	1151.1	-0.010113	0.144136	-0.0701626	0.944064	0.999862
YNL048W	711.475	-0.125218	0.121723	-1.02871	0.303614	0.999862
YML057C-A	2.69263	-0.197273	0.920675	-0.21427	0.830337	NA
YOR074C	528.025	-0.166782	0.1035	-1.61142	0.107087	0.999862
YPL028W	3663.58	-0.0978418	0.111403	-0.878267	0.379799	0.999862
YJR152W	250.178	-0.103777	0.140637	-0.737909	0.46057	0.999862
YKL025C	662.718	-0.0486698	0.131553	-0.369962	0.711411	0.999862
YAR008W	249.961	-0.103097	0.126449	-0.815325	0.414886	0.999862
YOR003W	229.576	0.186547	0.15289	1.22014	0.222411	0.999862
YOL097C	896.184	-0.0402315	0.0869681	-0.462601	0.64365	0.999862
YOR110W	410.941	-0.0679612	0.0988602	-0.687448	0.491801	0.999862
YDR407C	485.43	0.0707451	0.201064	0.351853	0.724948	0.999862
YNR020C	310.809	-0.0673901	0.152795	-0.441049	0.659177	0.999862
YBR258C	125.343	0.0194072	0.162891	0.119143	0.905162	0.999862
YNL146W	18.5692	0.352261	0.572043	0.615795	0.53803	0.999862
YFR019W	685.102	0.195372	0.124928	1.56388	0.117845	0.999862
YLR262C-A	1323.66	-0.1576	0.13453	-1.17149	0.241404	0.999862
YBR223C	234.972	0.100955	0.123695	0.816162	0.414407	0.999862
YNL241C	2919.97	-0.0755817	0.125128	-0.604035	0.54582	0.999862
YJL154C	771.995	-0.0574503	0.117517	-0.48887	0.624934	0.999862
YDR091C	926.306	-0.0130147	0.147477	-0.0882491	0.929679	0.999862
YJL123C	1488.63	-0.0623584	0.110327	-0.565216	0.571927	0.999862
YHR066W	611.828	0.0201811	0.15265	0.132205	0.894822	0.999862
YPL047W	162.02	-0.170591	0.13924	-1.22516	0.220515	0.999862
YER086W	1470.53	0.0692017	0.0849925	0.814209	0.415525	0.999862
YLR287C-A	3525.63	-0.0610654	0.116323	-0.524963	0.599609	0.999862
RPR1	5.00223	-0.100561	0.707573	-0.142122	0.886984	0.999862
YBR176W	204.043	-0.0339458	0.133669	-0.253955	0.79953	0.999862
YDR207C	453.59	-0.0087183	0.116579	-0.0747844	0.940386	0.999862
YKL125W	533.444	0.119971	0.117144	1.02414	0.305771	0.999862
YDR373W	429.603	0.0868062	0.124317	0.698267	0.48501	0.999862
YGL238W	817.085	-0.0216256	0.257879	-0.0838593	0.933168	0.999862
YLR190W	1458.98	0.326145	0.0744889	4.37844	1.19531e-05	0.0013042
YNL128W	46.3157	0.13258	0.248769	0.532945	0.594072	0.999862
YLR312C	920.095	0.0781955	0.107447	0.727759	0.466761	0.999862
YKL191W	517.213	-0.0634613	0.122605	-0.517607	0.604733	0.999862
YNR006W	737.743	-0.0133232	0.0890029	-0.149695	0.881006	0.999862
YHR120W	329.208	-0.131622	0.160022	-0.822521	0.41078	0.999862
YAR050W	231.927	0.223238	0.226164	0.987061	0.323613	0.999862
YOL137W	335.813	-0.0796191	0.172692	-0.461046	0.644765	0.999862
YDR530C	697.048	-0.10884	0.139338	-0.781116	0.434734	0.999862
YER111C	341.857	-0.042822	0.239152	-0.179057	0.857893	0.999862
YER144C	519.779	0.183214	0.0990905	1.84896	0.0644642	0.865435
YOL039W	2359.29	-0.0149114	0.127179	-0.117248	0.906664	0.999862
YIL083C	522.598	-0.0938425	0.0904666	-1.03732	0.299588	0.999862
YHL011C	904.027	-0.0043924	0.0994098	-0.0441848	0.964757	0.999862
YGR184C	950.593	0.0311786	0.161148	0.193478	0.846585	0.999862
YMR303C	1063.7	0.862994	0.157449	5.48111	4.22657e-08	8.74608e-06
YDR307W	387.269	-0.0347371	0.185863	-0.186896	0.851742	0.999862
YDR411C	636.428	0.153703	0.14615	1.05168	0.292946	0.999862
YBR205W	814.82	0.0103833	0.106104	0.09786	0.922043	0.999862
YOR321W	433.565	0.0110827	0.104476	0.106079	0.91552	0.999862
YMR186W	10571.3	-0.0213909	0.067777	-0.315608	0.7523	0.999862
YMR278W	530.86	0.236493	0.132119	1.79	0.0734532	0.916409
YLR136C	21.5503	-0.568445	0.417001	-1.36317	0.172828	0.999862
YMR207C	453.572	0.0155889	0.0955054	0.163225	0.870341	0.999862
YML015C	417.852	-0.123367	0.109349	-1.12819	0.259238	0.999862
YOR197W	862.098	0.0394346	0.0835396	0.472047	0.636893	0.999862
YKR089C	1547.78	-0.0158929	0.122163	-0.130096	0.896491	0.999862
YKR072C	912.437	0.00957758	0.0911194	0.10511	0.916288	0.999862
YDL014W	2436.47	-0.0565534	0.0951875	-0.594126	0.552428	0.999862
YER079W	469.778	-0.00430653	0.117804	-0.0365566	0.970839	0.999862
YER024W	1793.78	0.312178	0.422095	0.739592	0.459548	0.999862
YOR230W	6536.17	0.00047813	0.1117	0.0042805	0.996585	0.999862
YGR234W	11686.4	-0.449051	0.0477773	-9.39883	5.51738e-21	6.62196e-18
YMR178W	498.608	0.139301	0.12905	1.07944	0.280392	0.999862
YPR037C	639.115	-0.113407	0.179128	-0.633103	0.526666	0.999862
YEL068C	159.089	0.017112	0.160931	0.106332	0.915319	0.999862
YNL090W	236.431	0.0472453	0.14407	0.327932	0.742963	0.999862
YOR307C	380.666	0.0598259	0.140001	0.427325	0.669142	0.999862
YMR225C	595.719	-0.0315081	0.134635	-0.234026	0.814965	0.999862
YBR095C	443.677	-0.00165744	0.0978313	-0.0169419	0.986483	0.999862
YDR036C	911.78	-0.0633645	0.0925929	-0.684334	0.493764	0.999862
YGR043C	628.734	-0.0109875	0.154524	-0.0711052	0.943314	0.999862
YPL223C	1057.61	0.0135981	0.417988	0.0325323	0.974048	0.999862
YPL272C	260.606	-0.349727	0.201309	-1.73726	0.0823404	0.970776
YPR002C-A	23.7037	-0.139187	0.388163	-0.35858	0.71991	0.999862
YOL002C	759.177	-0.133755	0.173291	-0.771851	0.440203	0.999862
YFL005W	1097.83	-0.182712	0.0812839	-2.24783	0.0245871	0.53797
YCR010C	215.308	0.720786	0.338372	2.13016	0.0331583	0.619885
YMR152W	749.869	-0.0483028	0.0823707	-0.586408	0.557602	0.999862
YDR154C	3157.23	-0.0380867	0.173442	-0.219593	0.826188	0.999862
YMR125W	1031.37	-0.0463246	0.236848	-0.195588	0.844933	0.999862
YJR031C	417.797	-0.0351701	0.14472	-0.243021	0.807989	0.999862
YCL026C-A	2.97683	-0.103163	0.976633	-0.105631	0.915875	0.999862
YCL026C-B	187.413	-0.0641753	0.182763	-0.351139	0.725484	0.999862
YGR118W	3506	-0.0882402	0.126802	-0.695888	0.486499	0.999862
YJL055W	1226.84	-0.0146692	0.0982782	-0.149262	0.881347	0.999862
YPR102C	3015.86	-0.0827678	0.13616	-0.607874	0.543271	0.999862
YNL334C	190.598	-0.4942	0.179272	-2.75671	0.00583856	0.194651
YGL123W	8930.73	-0.0532116	0.111022	-0.479289	0.631733	0.999862
YPL064C	388.745	-0.103671	0.119142	-0.870143	0.384222	0.999862
YPL086C	474.749	-0.0326092	0.100287	-0.325158	0.745061	0.999862
Q0250	1.90071	-0.758471	1.38669	-0.546964	0.584403	NA
YPR153W	72.4365	-0.208309	0.248898	-0.836927	0.402634	0.999862
YMR042W	112.166	0.0621187	0.16345	0.380048	0.703909	0.999862
YLL003W	506.504	-0.064307	0.154691	-0.415713	0.67762	0.999862
YER042W	229.524	-0.0852828	0.13125	-0.649774	0.515838	0.999862
YDR109C	384.992	-0.0269994	0.0999446	-0.270144	0.787049	0.999862
YDR221W	540.851	0.0590921	0.107114	0.551677	0.58117	0.999862
YLR109W	7293.44	0.136473	0.148827	0.916991	0.359147	0.999862
YKR009C	481.126	-0.123369	0.125541	-0.982698	0.325756	0.999862
YMR078C	384.839	-0.113296	0.0997618	-1.13566	0.256098	0.999862
YLR094C	839.249	0.010706	0.109244	0.0980004	0.921932	0.999862
YBR037C	592.909	0.270777	0.122568	2.20919	0.0271615	0.565958
YLR041W	16.3649	0.248984	0.409831	0.607527	0.543501	0.999862
YJR060W	283.896	-0.0196539	0.137707	-0.142723	0.886509	0.999862
YNL161W	720.705	-0.0148059	0.0849774	-0.174233	0.861682	0.999862
YIL146C	356.654	-0.0528132	0.102189	-0.51682	0.605282	0.999862
YLR195C	598.801	0.0390597	0.102359	0.381597	0.70276	0.999862
YLR231C	889.905	0.02043	0.118935	0.171775	0.863615	0.999862
YKL016C	4468.43	-0.388725	0.0882523	-4.4047	1.05931e-05	0.00119942
YPL111W	1131.3	0.132621	0.191182	0.693691	0.487876	0.999862
YKL174C	516.527	-0.196989	0.139195	-1.4152	0.15701	0.999862
YKL121W	578.383	-0.0132386	0.129563	-0.102179	0.918614	0.999862
YLR380W	728.589	-0.0719248	0.126746	-0.567471	0.570394	0.999862
YOR142W-B	2273.95	0.093428	0.156436	0.597228	0.550355	0.999862
YMR012W	2536.93	-0.14202	0.158609	-0.895406	0.37057	0.999862
YER093C	369.152	0.0102562	0.133082	0.0770667	0.93857	0.999862
YOR032W-A	11.546	0.446884	0.444475	1.00542	0.314694	0.999862
YDL201W	406.906	-0.0442741	0.120066	-0.368749	0.712315	0.999862
YDR468C	379.407	-0.0549846	0.112782	-0.487528	0.625884	0.999862
snR73	1.88007	-0.0693377	1.53157	-0.0452723	0.96389	NA
snR71	2.34604	-0.440692	1.17998	-0.373473	0.708796	NA
snR70	22.2046	0.231802	0.323207	0.717195	0.473253	0.999862
snR77	3.28967	-0.976992	1.30943	-0.746121	0.455594	0.999862
snR76	40.517	-0.166332	0.260025	-0.639674	0.522385	0.999862
snR75	1.6447	-0.633037	1.34081	-0.472132	0.636833	NA
snR74	1.72911	1.78569	1.73894	1.02688	0.304476	NA
YFR003C	364.444	-0.0704716	0.150156	-0.469322	0.63884	0.999862
snR79	2.53449	0.136003	1.4654	0.0928092	0.926055	NA
YIL033C	2541.1	0.066949	0.113046	0.592229	0.553697	0.999862
YOR368W	204.567	-0.0112374	0.176098	-0.0638134	0.949119	0.999862
YGR128C	412.763	0.0204293	0.21987	0.0929152	0.925971	0.999862
YIL048W	657.378	0.130838	0.186932	0.699926	0.483974	0.999862
YLR337C	696.134	0.0818965	0.147454	0.555405	0.578618	0.999862
YOL056W	216.589	-0.0152851	0.126386	-0.12094	0.903738	0.999862
YFR052W	857.894	-0.000379398	0.119426	-0.00317685	0.997465	0.999862
YGR088W	3204.19	-0.706648	0.215083	-3.28546	0.00101817	0.0509168
YGL073W	656.596	-0.0339561	0.112204	-0.302627	0.762174	0.999862
YGL259W	40.1399	-0.196064	0.319639	-0.613392	0.539617	0.999862
YGR106C	1333.49	-0.0908544	0.215738	-0.421133	0.673658	0.999862
YIL168W	70.4514	0.213608	0.209861	1.01786	0.308747	0.999862
YGL086W	491.333	-0.0439474	0.219071	-0.200607	0.841006	0.999862
YAL044C	429.84	0.16028	0.215714	0.74302	0.457469	0.999862
YPR081C	525.78	-0.144699	0.0875201	-1.65332	0.098266	0.999862
YDR284C	618.23	0.0789078	0.102287	0.771439	0.440447	0.999862
YJL097W	445.618	-0.0464309	0.14823	-0.313236	0.754102	0.999862
YOR121C	8.50322	-0.66851	0.690758	-0.967792	0.333148	0.999862
YOR048C	968.794	-0.019041	0.0709924	-0.268212	0.788536	0.999862
YHR143W	1783.16	-0.104779	0.0958703	-1.09293	0.274426	0.999862
YMR315W-A	1.89364	0.105123	1.20152	0.0874913	0.930281	NA
YCL004W	284.825	0.186878	0.117892	1.58516	0.11293	0.999862
YPL042C	465.817	-0.131606	0.116243	-1.13216	0.257566	0.999862
YDR430C	793.67	0.176093	0.11208	1.57114	0.116151	0.999862
YGL102C	7.85738	-0.654613	0.703449	-0.930576	0.352073	0.999862
YDR487C	1156.93	-0.0289391	0.10508	-0.275402	0.783008	0.999862
YPR185W	639.017	0.131963	0.104595	1.26165	0.207074	0.999862
YER065C	3865.4	0.276059	0.471255	0.585795	0.558013	0.999862
YLR077W	772.489	0.00598499	0.0820743	0.0729216	0.941868	0.999862
YBR056W	1207.33	0.00240967	0.111206	0.0216685	0.982712	0.999862
YLL020C	199.968	-0.21023	0.148394	-1.4167	0.15657	0.999862
YHR034C	201.337	0.0937378	0.136272	0.687874	0.491532	0.999862
YBL019W	192.944	-0.0517432	0.126096	-0.410348	0.681551	0.999862
YOL070C	834.792	0.237873	0.13657	1.74176	0.0815505	0.965256
YJL085W	316.179	-0.0339857	0.158135	-0.214916	0.829833	0.999862
YPL200W	55.5254	-0.499093	0.24632	-2.0262	0.0427441	0.710553
YNR054C	347.482	0.0682078	0.129978	0.524765	0.599747	0.999862
YDR130C	271.121	0.00159916	0.131262	0.012183	0.99028	0.999862
YIL015W	920.223	0.353547	0.149061	2.37183	0.0177003	0.448183
YEL030W	150.107	0.108669	0.144317	0.752992	0.451455	0.999862
YBR291C	169.607	0.0815131	0.202221	0.403089	0.686883	0.999862
YML114C	462.098	-0.0245631	0.117245	-0.209503	0.834056	0.999862
YHR201C	601.398	-0.0559546	0.110032	-0.50853	0.611082	0.999862
YNL299W	394.569	0.175631	0.112317	1.56371	0.117885	0.999862
YGR008C	2633.98	-0.226191	0.144707	-1.5631	0.118029	0.999862
YNL311C	273.324	-0.00260804	0.182257	-0.0143097	0.988583	0.999862
YPR170C	1.26778	0.986017	1.45272	0.678737	0.497305	NA
YJL030W	191.828	0.00109152	0.128569	0.00848973	0.993226	0.999862
YGR248W	372.959	0.178292	0.267857	0.665626	0.50565	0.999862
YBR074W	503.213	0.0268221	0.127244	0.210793	0.833049	0.999862
YOR150W	677.776	0.0915125	0.101001	0.906058	0.364905	0.999862
YML036W	137.747	-0.0558462	0.177079	-0.315375	0.752477	0.999862
YDL236W	926.32	-0.0363818	0.0980661	-0.370993	0.710643	0.999862
YDL088C	646.557	-0.0233357	0.125363	-0.186144	0.852332	0.999862
YLR113W	2228.93	0.00993907	0.0745282	0.13336	0.893909	0.999862
YLR142W	96.7016	0.166776	0.305387	0.546112	0.584989	0.999862
YLL058W	409.577	0.00393642	0.12032	0.0327164	0.973901	0.999862
YDL197C	569.828	-0.00217286	0.134464	-0.0161594	0.987107	0.999862
YER130C	467.327	-0.139983	0.123678	-1.13184	0.257702	0.999862
YER165W	4808.89	-0.0314424	0.0911105	-0.345101	0.730018	0.999862
YMR106C	200.071	0.142599	0.146374	0.974215	0.32995	0.999862
YER187W	248.339	-0.316298	0.145943	-2.16727	0.0302143	0.594479
YGL112C	855.655	0.0120087	0.0831903	0.144353	0.885222	0.999862
YMR244W	14.1953	0.55471	0.47374	1.17092	0.241632	0.999862
YDL008W	209.051	0.0368867	0.184272	0.200175	0.841344	0.999862
YBL050W	1270.18	-0.123916	0.0996203	-1.24388	0.213543	0.999862
YJR086W	237.802	-0.157855	0.141908	-1.11237	0.265978	0.999862
YJR014W	893.375	0.00415252	0.0945392	0.0439238	0.964965	0.999862
YHR050W	1230.63	-0.0952897	0.119857	-0.795029	0.426597	0.999862
YPL018W	146.853	0.0453643	0.145475	0.311835	0.755166	0.999862
YPL185W	9.26833	0.634974	0.535253	1.18631	0.235501	0.999862
YJR041C	287.146	-0.0327389	0.320537	-0.102137	0.918648	0.999862
YDL248W	1.20557	1.90606	2.09512	0.909759	0.362949	NA
YKR028W	1175.23	-0.0480637	0.0921065	-0.521827	0.601791	0.999862
YKL037W	1.64099	0.128036	1.28335	0.0997668	0.920529	NA
YMR286W	482.701	0.134682	0.154497	0.871748	0.383346	0.999862
YDL175C	332.628	-0.0155407	0.120766	-0.128685	0.897607	0.999862
YKL168C	399.261	0.0711542	0.0909493	0.78235	0.434009	0.999862
YFL026W	1486.3	0.132025	0.242845	0.54366	0.586676	0.999862
YDL102W	506.791	0.018559	0.119999	0.15466	0.877089	0.999862
YGL029W	298.329	-0.0206659	0.18069	-0.114372	0.908943	0.999862
YDL128W	2136.96	0.0345362	0.0802503	0.430356	0.666937	0.999862
YPL098C	436.27	0.0975414	0.148306	0.657702	0.51073	0.999862
YMR033W	694.314	-0.128721	0.16218	-0.793693	0.427374	0.999862
YPR003C	367.214	0.0961596	0.121752	0.789799	0.429645	0.999862
YGR262C	480.129	-0.0833706	0.12519	-0.665954	0.505441	0.999862
YDR202C	450.435	-0.0845574	0.099167	-0.852677	0.393839	0.999862
YGR215W	512.375	0.0718025	0.126361	0.568233	0.569877	0.999862
YDR253C	29.0566	0.239894	0.306573	0.782503	0.433919	0.999862
YCR082W	810.024	-0.109513	0.0774273	-1.4144	0.157244	0.999862
YOR001W	768.995	0.00716788	0.105577	0.0678927	0.945871	0.999862
YKL088W	664.137	-0.0749724	0.107186	-0.699461	0.484264	0.999862
YEL075W-A	8.14978	-0.796023	0.775691	-1.02621	0.304792	0.999862
YLR276C	859.296	0.0422954	0.151008	0.280087	0.779411	0.999862
YDL222C	339.999	-0.0303057	0.205476	-0.14749	0.882745	0.999862
YNL140C	58.3306	0.212436	0.269998	0.786806	0.431395	0.999862
YOL095C	192.085	-0.132364	0.154675	-0.855761	0.39213	0.999862
YNR022C	614.091	0.0721122	0.119332	0.6043	0.545644	0.999862
YDR409W	389.447	0.130621	0.125716	1.03902	0.298796	0.999862
YBR221C	4988.99	-0.0714013	0.0627622	-1.13765	0.255267	0.999862
YEL018C-A	3.92312	-0.498191	1.04396	-0.477213	0.633211	0.999862
YAL005C	18344.4	0.046899	0.134361	0.349052	0.72705	0.999862
YPL158C	442.118	0.146164	0.113517	1.28759	0.197887	0.999862
tG(GCC)P2	1.64261	-0.102573	1.30109	-0.0788367	0.937162	NA
YJL121C	1070.9	0.0512499	0.149855	0.341995	0.732354	0.999862
YKL008C	456.335	-0.0159485	0.153861	-0.103655	0.917443	0.999862
YER158W-A	5.76526	0.452937	0.752864	0.601618	0.547428	0.999862
YBR103W	567.248	-0.189351	0.105779	-1.79006	0.073444	0.916409
YNR004W	49.6147	-0.142114	0.221393	-0.64191	0.520932	0.999862
YPL032C	930.008	-0.0332158	0.0913457	-0.363628	0.716136	0.999862
YHR064C	2576.52	0.0229909	0.091759	0.250558	0.802156	0.999862
YKL197C	391.713	-0.0703642	0.0978498	-0.719105	0.472076	0.999862
YMR020W	296.231	0.0223487	0.136793	0.163376	0.870223	0.999862
YDR206W	669.328	-0.0215644	0.14745	-0.146249	0.883725	0.999862
YDR377W	2284.92	-0.356457	0.0782661	-4.55442	5.25295e-06	0.000656728
YIR007W	273.348	0.262193	0.145332	1.8041	0.0712149	0.907348
YPL045W	399.391	-0.0440195	0.136964	-0.321394	0.747912	0.999862
YLR314C	1222.5	0.0900968	0.131353	0.685915	0.492767	0.999862
YFR020W	121.981	-0.231487	0.15761	-1.46874	0.141904	0.999862
YNL126W	277.505	-0.0495943	0.267019	-0.185733	0.852654	0.999862
YOR327C	850.387	-0.100177	0.116243	-0.861788	0.388804	0.999862
YOL139C	2458.77	-0.0627757	0.0963723	-0.651388	0.514796	0.999862
YBR207W	1042.52	-0.0388784	0.0782994	-0.496535	0.619517	0.999862
YNL269W	10.0819	0.367178	0.559988	0.655689	0.512024	0.999862
YDR532C	274.448	-0.14344	0.186891	-0.767505	0.442781	0.999862
YKL210W	3482.9	-0.0643446	0.0797789	-0.806537	0.419933	0.999862
YER146W	363.081	-0.250952	0.168479	-1.48952	0.13635	0.999862
YHR159W	243.613	0.0701614	0.140167	0.500557	0.616683	0.999862
YPL132W	453.755	0.0780901	0.09486	0.823214	0.410386	0.999862
YIL114C	206.122	0.0897578	0.133476	0.672466	0.501287	0.999862
YJL089W	116.542	0.307886	0.622389	0.494684	0.620823	0.999862
YMR301C	577.502	-0.05782	0.0876337	-0.659792	0.509387	0.999862
YJL217W	1017.94	-0.0647797	0.113229	-0.572111	0.567247	0.999862
YBL029W	156.295	0.011013	0.199654	0.0551602	0.956011	0.999862
YMR188C	745.406	0.107926	0.110321	0.978289	0.327931	0.999862
YGR154C	131.783	0.115798	0.198817	0.582438	0.560271	0.999862
snR191	6.03121	0.580605	0.639793	0.907488	0.364149	0.999862
snR190	8.41819	-0.277251	0.640324	-0.432986	0.665025	0.999862
YOR389W	392.597	0.0353607	0.198633	0.17802	0.858707	0.999862
YLR130C	887.852	0.0742815	0.103751	0.715959	0.474017	0.999862
YER022W	390.874	-0.0936404	0.17463	-0.536221	0.591806	0.999862
YBR140C	604.618	0.0911705	0.166943	0.546117	0.584985	0.999862
YKR070W	438.652	-0.131307	0.133748	-0.981749	0.326223	0.999862
YGL262W	3.67961	1.70572	1.11864	1.52482	0.127304	0.999862
YMR205C	4758.94	0.0650344	0.105023	0.619236	0.535761	0.999862
YNL203C	22.4597	0.142446	0.326137	0.436766	0.662281	0.999862
YJL185C	312.584	-0.0581489	0.146329	-0.397383	0.691085	0.999862
YNL022C	427.874	-0.0247184	0.10865	-0.227505	0.820031	0.999862
YML017W	361.464	0.0341761	0.131235	0.260419	0.79454	0.999862
YKR087C	536.82	-0.0843754	0.095178	-0.886501	0.375348	0.999862
YOR232W	1668.58	0.0236726	0.0664545	0.356223	0.721674	0.999862
YGR281W	898.506	-0.0178795	0.161565	-0.110664	0.911883	0.999862
YGR236C	48.2697	-0.0331328	0.304096	-0.108955	0.913238	0.999862
YKR091W	297.121	0.253371	0.154848	1.63626	0.101786	0.999862
YHL013C	336.188	-0.238732	0.113769	-2.09838	0.0358712	0.646636
YMR185W	372.134	0.0266317	0.200662	0.132719	0.894415	0.999862
YLR120W-A	3.54411	0.139126	0.775816	0.179328	0.85768	0.999862
YOR309C	92.3727	-0.0740498	0.235842	-0.31398	0.753536	0.999862
YBR097W	227.379	-0.0915956	0.242102	-0.378335	0.705182	0.999862
YMR227C	413.423	-0.0279032	0.0954624	-0.292295	0.770061	0.999862
YDR030C	153.716	-0.0674286	0.188174	-0.358332	0.720095	0.999862
YPL221W	2213.77	-0.00545287	0.107691	-0.0506343	0.959617	0.999862
YPL274W	849.59	0.135081	0.218163	0.619174	0.535802	0.999862
YEL051W	1257.05	-0.0152512	0.0831524	-0.183412	0.854475	0.999862
YOL004W	1473.46	0.0226831	0.125321	0.181001	0.856367	0.999862
YGR014W	1910.33	0.0393506	0.120787	0.325785	0.744587	0.999862
YGR041W	283.612	-0.183185	0.135411	-1.35281	0.176117	0.999862
YER179W	28.9354	-0.283127	0.340629	-0.831191	0.405866	0.999862
YMR150C	376.568	-0.0696996	0.120231	-0.579716	0.562106	0.999862
YML056C	970.31	-0.000689409	0.115883	-0.00594915	0.995253	0.999862
YFL007W	1168.3	0.0526091	0.102321	0.514158	0.607141	0.999862
YGL182C	2.53589	-0.320514	1.09706	-0.292157	0.770167	NA
YCR012W	30581.5	-0.0713599	0.1485	-0.480539	0.630844	0.999862
Q0050	5.4653	0.0853133	0.745719	0.114404	0.908918	0.999862
Q0275	1.26661	0.0560401	1.38314	0.0405166	0.967681	NA
YPL084W	756.401	0.043897	0.152963	0.286978	0.774129	0.999862
YDR354W	730.272	-0.0118272	0.0935065	-0.126486	0.899348	0.999862
[truncated: 4,248 more rows]

## Sheet: deseq.pam.1h
	baseMean	log2FoldChange	lfcSE	stat	pvalue	padj
YAL008W	469.977	0.321032	0.170215	1.88604	0.0592895	0.312241
YBR255W	321.011	-0.0674501	0.139701	-0.482817	0.629226	0.891189
YGR131W	9.17991	0.213636	0.54849	0.389498	0.696908	0.921377
YNL003C	245.802	-0.0310137	0.125516	-0.247089	0.804839	0.951939
YBR135W	237.713	-0.0619988	0.182005	-0.340643	0.733372	0.936099
YBR160W	393.303	0.284237	0.103546	2.74502	0.00605074	0.0645096
YJL082W	720.473	0.0144678	0.166139	0.0870823	0.930606	0.983987
YJL142C	28.1424	0.364776	0.303903	1.2003	0.230021	0.622156
YPL191C	85.6658	0.00711615	0.268141	0.0265389	0.978828	0.996422
YGL215W	2001.52	-0.0237051	0.131986	-0.179604	0.857463	0.965688
YKL074C	467.911	-0.0870918	0.105442	-0.825972	0.40882	0.776916
YKL096W-A	13117.2	0.0469646	0.153893	0.305178	0.760231	0.943125
YIL124W	510.11	0.657583	0.160983	4.0848	4.41147e-05	0.00102082
YPL039W	237.73	0.116795	0.118641	0.984437	0.324901	0.711947
YNL170W	10.2678	-0.115081	0.657743	-0.174963	0.861109	0.967184
YGL141W	396.297	0.319258	0.157041	2.03296	0.0420561	0.250166
YJL179W	249.589	-0.0270709	0.117259	-0.230865	0.81742	0.957671
YDR316W-B	2373.64	0.908305	0.261302	3.47608	0.000508808	0.00866722
YKL083W	11.1962	-0.0779703	0.641931	-0.121462	0.903325	0.975567
YBR152W	163.651	0.0306024	0.162018	0.188882	0.850185	0.963393
YKL029C	4379.5	-0.232376	0.179864	-1.29195	0.196373	0.574818
YPL166W	53.9026	-0.00828408	0.248985	-0.0332714	0.973458	0.99479
YKL052C	326.443	0.134845	0.134934	0.999344	0.317628	0.706624
YHR025W	1130.63	-0.206435	0.151896	-1.35906	0.174128	0.552023
YOL034W	316.228	0.0536377	0.132848	0.403754	0.686394	0.916141
YBL008W	364.535	0.0225363	0.120763	0.186616	0.851961	0.964365
YIL062C	532.558	-0.0697827	0.16996	-0.410584	0.681378	0.914441
YOL116W	184.652	-0.125757	0.125986	-0.998179	0.318192	0.706794
YDR196C	272.649	0.159722	0.138571	1.15263	0.249061	0.642802
YNL255C	2093.99	-0.163911	0.162323	-1.00978	0.312601	0.701405
YNR032W	211.644	0.0334815	0.139549	0.239927	0.810387	0.953866
YNR045W	329.835	-0.216357	0.11182	-1.93487	0.0530063	0.293046
YML105C	532.801	-0.157465	0.112841	-1.39545	0.162879	0.533241
YNL288W	440.927	-0.0324843	0.126821	-0.256143	0.79784	0.9511
YIL059C	110.931	0.135773	0.158467	0.856792	0.39156	0.768441
YIL004C	227.491	-0.158202	0.149812	-1.056	0.290966	0.685239
YNR018W	2582.56	-0.484779	0.18399	-2.63482	0.00841824	0.0833502
YPL144W	127.83	-0.135908	0.189791	-0.716092	0.473934	0.819492
YFR047C	563.024	-0.037698	0.147923	-0.254849	0.798839	0.9511
YER087C-B	288.518	-0.14272	0.169346	-0.842774	0.399355	0.77236
YHR078W	332.998	-0.0835065	0.129144	-0.646616	0.51788	0.844594
YJR115W	36.2418	0.347089	0.280294	1.2383	0.215603	0.604184
YLR355C	13920	0.136257	0.103856	1.31197	0.189529	0.568194
YGR099W	208.939	-0.0348013	0.120325	-0.289228	0.772407	0.946265
YLR300W	14037.2	0.296876	0.0927836	3.19966	0.00137588	0.0201082
YCL028W	858.179	-0.121176	0.102755	-1.17927	0.238289	0.629297
YJR140C	311.763	-0.0375385	0.169265	-0.221774	0.82449	0.959197
YOR033C	320.177	0.204913	0.135951	1.50726	0.131743	0.477353
YOR062C	102.947	0.29952	0.231356	1.29463	0.195448	0.574743
YBR043C	620.381	-0.0150954	0.104631	-0.144273	0.885285	0.971334
YHR112C	421.116	0.185717	0.139442	1.33186	0.182905	0.562055
YLR011W	79.5331	0.138394	0.18861	0.733757	0.463097	0.811973
YIL044C	317.582	-0.203867	0.107275	-1.90042	0.0573784	0.306285
YNL197C	755.023	0.0178451	0.135093	0.132095	0.894909	0.97248
YKR103W	134.719	0.2318	0.161261	1.43743	0.150597	0.508566
YLR133W	191.891	0.463118	0.146398	3.16342	0.00155928	0.0223606
YER121W	51.2552	0.238376	0.277388	0.859359	0.390142	0.767818
YCR046C	435.81	0.236471	0.163292	1.44815	0.147575	0.503932
YNL144C	616.616	0.168923	0.126017	1.34048	0.180089	0.559919
YKL204W	697.411	0.0767995	0.106285	0.722584	0.469936	0.816298
YOR266W	234.357	0.0800596	0.11211	0.714118	0.475154	0.819935
YDR393W	278.46	-0.173931	0.111147	-1.56487	0.117612	0.447103
YGL171W	963.194	-0.104062	0.102262	-1.0176	0.308867	0.699651
YPR194C	1251.05	-0.787227	0.253947	-3.09996	0.00193545	0.02669
YGR019W	1375.24	0.568193	0.100303	5.66477	1.47226e-08	6.81365e-07
YBL033C	2115.79	0.0345451	0.166126	0.207945	0.835272	0.961137
tE(UUC)G3	1.15417	1.03456	1.72986	0.598062	0.549798	NA
YJL188C	29.4595	-0.347575	0.443379	-0.783923	0.433085	0.793794
YLL057C	22.7118	0.38776	0.342155	1.13329	0.257093	0.651964
YPL060C-A	11.2824	1.25487	1.88546	0.665552	0.505698	0.840349
YBR296C	70.2892	0.188838	0.194596	0.97041	0.331842	0.718349
YNL277W	82.5088	0.616945	0.274094	2.25085	0.0243952	0.181519
YMR040W	59.0532	0.476892	0.226919	2.1016	0.0355886	0.228133
YDR077W	64521.5	0.381302	0.12147	3.13906	0.00169489	0.0242484
YMR266W	1364.83	0.0355301	0.102551	0.346464	0.728994	0.933949
YKR064W	367.754	0.00690188	0.188853	0.0365463	0.970847	0.994117
YPL089C	1586.9	0.100682	0.11089	0.907951	0.363904	0.747355
YGR277C	271.303	0.198114	0.133664	1.48217	0.138294	0.488308
YDL139C	78.1413	0.313493	0.23163	1.35342	0.175921	0.554162
YDR246W	267.014	0.219763	0.134401	1.63513	0.102023	0.413733
YOR288C	103.409	-0.0562595	0.22743	-0.247371	0.804621	0.951865
YCR028C	445.546	-0.0634111	0.113	-0.561157	0.57469	0.868229
YML054C	1567.34	-1.14915	0.229281	-5.01198	5.38718e-07	1.90233e-05
YLR179C	575.674	0.142958	0.145096	0.985267	0.324493	0.711947
YOR141C	742.568	-0.0165128	0.103885	-0.158952	0.873706	0.971156
YPL280W	169.23	0.886515	0.165126	5.36873	7.92937e-08	3.36393e-06
YBL106C	105.058	0.198674	0.193453	1.02699	0.304426	0.693712
YGL044C	324.687	-0.135854	0.108687	-1.24995	0.211316	0.599322
YER107C	435.16	-0.053675	0.135131	-0.397208	0.691214	0.918961
YBR038W	463.913	0.165767	0.200005	0.828813	0.40721	0.775814
YER076W-A	1.34725	-0.266789	1.70013	-0.156923	0.875306	NA
YGR259C	6.16417	0.950361	0.695661	1.36613	0.171899	0.548085
YEL047C	544.243	0.0835219	0.164236	0.508549	0.611068	0.882796
YPR016C	1646.76	-0.029116	0.128139	-0.227223	0.820251	0.958242
YOR208W	616.049	0.304573	0.219202	1.38947	0.164691	0.537648
YDL055C	11628.8	0.0983266	0.157316	0.625028	0.531953	0.853611
YML009C	226.783	-0.0256754	0.149047	-0.172264	0.86323	0.967965
YML072C	1379.38	-0.118836	0.126358	-0.940474	0.346975	0.731779
YDR142C	257.533	-0.0201889	0.120491	-0.167556	0.866933	0.968898
YFL044C	537.278	0.2693	0.121256	2.22092	0.0263566	0.190672
RDN37-2	4.37535	2.13286	1.34805	1.58218	0.113608	0.440097
YEL011W	221.964	0.869322	0.226749	3.83385	0.000126152	0.00256034
YKL019W	501.17	-0.178849	0.139136	-1.28542	0.198645	0.57897
YJL130C	9607.95	-0.191211	0.226434	-0.844444	0.398422	0.77146
YBL085W	717.381	0.101536	0.0859447	1.18141	0.237439	0.628746
YBR116C	226.167	1.29827	0.244899	5.30124	1.15018e-07	4.71574e-06
YDR166C	429.992	-0.0281656	0.189158	-0.1489	0.881633	0.971334
YDR082W	307.291	-0.197757	0.12433	-1.59058	0.111704	0.435205
YDR348C	749.912	-0.242694	0.103183	-2.35207	0.018669	0.149475
YKL182W	6691.08	-0.190358	0.129854	-1.46594	0.142666	0.495384
YKL018C-A	158.253	-0.0434964	0.189344	-0.229722	0.818308	0.957671
YPL027W	4.49503	0.419693	0.680265	0.616955	0.537265	0.857406
YKL135C	681.355	0.00364603	0.166851	0.021852	0.982566	0.997024
YLR363C	95.1758	-0.20007	0.249917	-0.800546	0.423394	0.787132
YEL077W-A	1.62237	0.109007	1.67817	0.0649557	0.948209	NA
YDR179C	80.6885	-0.366633	0.419683	-0.873596	0.382339	0.761312
YML089C	37.9176	-2.36248	0.350782	-6.7349	1.6404e-11	1.05486e-09
YLR431C	309.072	0.417702	0.137705	3.0333	0.00241894	0.0321558
YKR046C	2914.47	0.294173	0.124243	2.36773	0.0178977	0.145977
YJR005W	628.303	-0.182443	0.160109	-1.13949	0.254497	0.648613
YJL116C	5327.69	-0.079936	0.137486	-0.58141	0.560964	0.863626
YMR030W	98.0938	-0.0272651	0.169306	-0.161041	0.872061	0.97021
YER030W	556.983	-0.0768461	0.131701	-0.58349	0.559564	0.863626
YIR026C	862.245	-0.125942	0.166985	-0.754213	0.450722	0.807685
YJR072C	1048.21	-0.042617	0.148697	-0.286603	0.774416	0.946371
YDR515W	353.372	0.131077	0.14826	0.884099	0.376643	0.756133
YKR039W	1216.27	0.773373	0.49716	1.55558	0.119808	0.451236
YGL003C	454.667	0.0442247	0.0979416	0.451541	0.651599	0.901205
YPL009C	823.934	-0.0293259	0.0981365	-0.298827	0.765072	0.944848
YDR268W	217.802	0.166784	0.141456	1.17905	0.238377	0.629297
YGL192W	4.39294	-1.41358	0.791851	-1.78515	0.0742363	0.349391
YDL117W	834.337	0.133172	0.101932	1.30648	0.191388	0.570314
YMR131C	3432.31	-0.0923784	0.1173	-0.787537	0.430968	0.792483
YMR293C	202.42	-0.0216041	0.155987	-0.138499	0.889846	0.971645
YJL214W	16.9062	-0.147211	0.395507	-0.372209	0.709737	0.92645
YIL105C	342.315	0.102002	0.179203	0.5692	0.56922	0.865711
YML126C	3036.54	0.0431262	0.114383	0.377034	0.706148	0.92464
YLR189C	424.203	0.0514537	0.121869	0.422205	0.672876	0.912047
YIL150C	196.73	0.016058	0.148147	0.108393	0.913684	0.978558
YLR349W	5.69006	-0.0977558	0.685853	-0.142532	0.88666	0.971334
YGL250W	73.15	0.352708	0.21652	1.62898	0.103316	0.416883
YBR212W	761.709	0.461595	0.0882162	5.23255	1.67189e-07	6.62264e-06
YJR109C	2551.42	-0.125061	0.0947253	-1.32025	0.186753	0.564713
YLR254C	319.025	0.00046367	0.162101	0.00286037	0.997718	0.999766
YGR085C	5956.75	-0.259275	0.144384	-1.79573	0.0725368	0.34431
YPL105C	1691.14	-0.0789409	0.0894599	-0.882417	0.377551	0.7571
YGR145W	1345.13	-0.142869	0.110563	-1.29219	0.196291	0.574818
YJR094C	50.3976	-0.146165	0.383512	-0.381122	0.703113	0.923713
YKL177W	7.72611	0.095711	0.523709	0.182756	0.854989	0.964478
YGL154C	101.109	0.103591	0.187761	0.551716	0.581143	0.86839
YBR129C	250.059	-0.0229674	0.158145	-0.14523	0.884529	0.971334
tK(UUU)D	4.06843	0.229789	0.788179	0.291544	0.770636	0.946036
YMR322C	21.9055	2.31611	0.57528	4.02605	5.67212e-05	0.00126463
YKL099C	584.586	-0.0655587	0.130332	-0.503011	0.614957	0.884362
YDR315C	73.5139	0.351262	0.214571	1.63704	0.101621	0.413301
YLR394W	381.138	-0.762963	0.144458	-5.28158	1.28078e-07	5.14754e-06
YNL104C	4737.65	-0.240861	0.113379	-2.12438	0.0336382	0.21838
YNL151C	514.391	-0.171166	0.12815	-1.33567	0.181658	0.560479
YNR066C	141.189	0.563502	0.219874	2.56284	0.0103819	0.098034
YLR220W	749.065	-0.120453	0.132785	-0.907135	0.364336	0.747355
YHR006W	1008.51	0.0926417	0.0885564	1.04613	0.2955	0.688522
YMR232W	44.1488	-0.0206574	0.324385	-0.0636817	0.949224	0.988883
YNL083W	359.3	0.0331559	0.11796	0.281078	0.77865	0.946722
YGR038C-B	2278.65	-0.117537	0.155483	-0.755951	0.449679	0.807031
YMR238W	1466.09	0.288086	0.133921	2.15116	0.0314637	0.211222
YER168C	457.364	-0.104851	0.117998	-0.888579	0.374229	0.754121
YPL265W	1192.44	-0.085814	0.129027	-0.665083	0.505997	0.840349
YOR227W	593.377	0.128253	0.184061	0.696795	0.485931	0.826017
YOR081C	366.41	0.255262	0.124362	2.05258	0.0401138	0.244439
YEL026W	3134.88	-0.0800845	0.135557	-0.590779	0.554669	0.862643
YGR050C	5.65918	-0.661078	0.63821	-1.03583	0.30028	0.689629
YDR021W	341.191	-0.191929	0.175905	-1.0911	0.275231	0.671817
YGL063W	76.2059	-0.0793515	0.223061	-0.35574	0.722036	0.932146
YPL212C	1733.54	-0.0796745	0.0964661	-0.825933	0.408842	0.776916
YOL157C	37.1681	-0.0241629	0.344348	-0.0701698	0.944059	0.987755
YPR095C	446.948	-0.0913818	0.129262	-0.706953	0.479596	0.82267
YOR310C	4465.68	-0.112014	0.0944527	-1.18593	0.235651	0.626339
YDR188W	2256.5	0.00960709	0.103742	0.0926053	0.926217	0.983139
YOL128C	210.229	-0.164369	0.13185	-1.24664	0.212528	0.600524
YGL236C	594.233	0.0246172	0.139278	0.176749	0.859706	0.966894
YHR133C	361.832	-0.109639	0.104672	-1.04745	0.294892	0.688522
YDR017C	1071.38	-0.0636786	0.120249	-0.529557	0.596419	0.877323
YIL090W	789.347	-0.156428	0.116202	-1.34617	0.178247	0.558345
YBR183W	284.559	0.183282	0.215556	0.850275	0.395172	0.769137
YOL048C	72.9777	0.0094032	0.205149	0.045836	0.963441	0.991489
YML039W	6.57357	1.1667	3.25532	0.358398	0.720046	0.930954
YCR007C	89.4897	-0.29505	0.233285	-1.26476	0.205957	0.589871
YDR540C	18.303	0.0775155	0.371369	0.208729	0.83466	0.961137
YEL004W	139.074	-0.0175595	0.278098	-0.0631415	0.949654	0.989031
YPR057W	284.595	-0.143493	0.115503	-1.24232	0.214117	0.602784
YLL032C	190.617	0.233447	0.164647	1.41787	0.15623	0.520685
YDR116C	498.605	0.0317401	0.114913	0.276211	0.782386	0.947205
YPL119C-A	17.6131	0.409131	0.660776	0.619167	0.535806	0.856197
YDR299W	1356.86	-0.341918	0.101651	-3.36366	0.000769164	0.0125302
YLR030W	70.4437	0.227218	0.181926	1.24896	0.21168	0.600071
YDR122W	569.754	0.0124875	0.140108	0.0891277	0.92898	0.98356
YOL062C	778.816	-0.253283	0.123902	-2.04422	0.0409316	0.246942
YNL234W	209.571	0.0177024	0.187554	0.0943855	0.924803	0.983056
YLR467W	1272.95	0.172581	0.167325	1.03141	0.302349	0.693194
YJL194W	304.314	0.123393	0.165872	0.743902	0.456936	0.809499
YOL015W	31.0681	0.0340095	0.332601	0.102253	0.918556	0.981444
YDL070W	2414.68	-0.19764	0.198697	-0.994682	0.319891	0.707228
YOR241W	529.447	0.0591183	0.0961329	0.614964	0.538579	0.858798
YLR056W	6038.96	0.142639	0.134734	1.05867	0.289749	0.684265
YMR054W	587.534	0.235347	0.104581	2.25039	0.0244244	0.181519
YKL110C	721.42	-0.343127	0.144547	-2.37381	0.0176055	0.144559
YML100W-A	1.41061	-1.00527	1.36682	-0.735481	0.462047	NA
YPR070W	356.731	-0.107152	0.163398	-0.655769	0.511972	0.843316
YLR204W	385.316	0.143524	0.162741	0.881922	0.377819	0.75725
YML097C	466.617	-0.202177	0.120611	-1.67628	0.0936839	0.394972
YKR007W	280.775	-0.0943365	0.149281	-0.631941	0.527425	0.850367
YHR193C	3514.43	-0.254386	0.176096	-1.44459	0.148573	0.505401
YBL099W	6106.97	-1.75431	0.0908147	-19.3175	3.82574e-83	3.89524e-80
YJR035W	348.931	-0.0296306	0.157186	-0.188507	0.850479	0.963393
YOR126C	229.242	0.134287	0.142201	0.94435	0.344991	0.730267
YMR023C	222.808	0.00761249	0.123211	0.061784	0.950735	0.989145
YOR119C	1519.45	0.0317414	0.0993823	0.319387	0.749433	0.940564
YNL196C	4.61774	0.216563	0.729326	0.296936	0.766515	0.945983
YNL187W	234.569	0.0725172	0.177194	0.409254	0.682353	0.914698
YMR141C	10.6144	-0.581688	0.545763	-1.06582	0.286503	0.682091
YLL014W	264.239	-0.209024	0.173575	-1.20423	0.228501	0.620257
YCR061W	160.837	0.202889	0.158664	1.27873	0.200993	0.583119
YPR115W	493.39	0.17925	0.159248	1.12561	0.260333	0.656569
YHR088W	978.291	-0.206747	0.110269	-1.87493	0.0608023	0.31612
YBR017C	849.293	0.141881	0.0922483	1.53803	0.12404	0.461431
YPR162C	267.054	-0.00664926	0.145156	-0.0458077	0.963464	0.991489
YGR166W	469.337	0.209867	0.154037	1.36244	0.173058	0.550713
YDL161W	584.533	-0.0663605	0.1098	-0.604374	0.545595	0.860361
YKL050C	170.082	-0.0354189	0.132051	-0.268222	0.788529	0.948944
YJR055W	98.372	-0.0382994	0.194365	-0.197048	0.84379	0.962099
YGL099W	1039.05	-0.177038	0.0904996	-1.95623	0.0504383	0.283466
YFL030W	969.558	-1.9913	0.115248	-17.2784	6.84056e-67	4.1789e-64
YIL119C	139.909	0.0459821	0.305095	0.150714	0.880201	0.971334
YPL193W	603.558	0.00554808	0.116522	0.0476138	0.962024	0.991489
YNL005C	850.171	-0.138578	0.0836705	-1.65624	0.0976733	0.404259
YJL144W	34.6896	1.14113	0.294572	3.87385	0.00010713	0.00220823
YBR012W-B	12.8891	1.1848	1.41974	0.834518	0.403989	0.774519
YJR139C	1330.64	-0.0291433	0.0913128	-0.319159	0.749606	0.940564
YBR133C	389.243	0.0463515	0.113081	0.409898	0.681881	0.914698
YBR162C	2727.17	-0.0244017	0.0992802	-0.245786	0.805848	0.952607
YNL331C	182.152	0.161771	0.148059	1.09262	0.274563	0.671458
YJL079C	2693.7	0.0112764	0.13268	0.0849895	0.93227	0.984176
YGL019W	575.568	-0.0812787	0.137634	-0.590542	0.554827	0.862643
YGR201C	237.949	0.494614	0.275791	1.79344	0.0729029	0.345511
YNL172W	344.855	0.131473	0.186387	0.705375	0.480577	0.822764
YNL058C	512.748	0.530504	0.118399	4.48064	7.44209e-06	0.00021048
YPL160W	3327.55	-0.130638	0.0952964	-1.37086	0.170419	0.545483
YNL023C	796.687	0.0456636	0.113762	0.401397	0.688128	0.917253
YDR214W	2230.93	0.560504	0.156828	3.57401	0.000351559	0.00638657
YLR222C	1596.03	-0.0741008	0.100325	-0.738606	0.460146	0.810083
YLR295C	1392.34	-1.51881	0.110545	-13.7393	5.90044e-43	1.0923e-40
YER175W-A	4.39866	-0.479129	1.13248	-0.423079	0.672238	0.912015
YHR168W	245.555	-0.0721735	0.126533	-0.570391	0.568413	0.865711
YOR064C	302.188	-1.19277	0.135645	-8.79331	1.45214e-18	1.30458e-16
YOR159C	195.572	-0.289649	0.164361	-1.76227	0.0780233	0.358732
YOL081W	993.604	0.189168	0.25943	0.729166	0.4659	0.813314
YOL036W	1358.3	0.0873919	0.107362	0.813995	0.415648	0.78057
YGL148W	1782.4	-0.382202	0.140317	-2.72384	0.00645278	0.0679655
YOR031W	115.793	0.628259	0.250293	2.5101	0.0120698	0.109567
YBR282W	328.878	0.158339	0.138809	1.1407	0.253996	0.648236
YDR194C	1644.66	-0.0707291	0.11191	-0.632015	0.527377	0.850367
YOL114C	10.5369	0.938072	0.476928	1.96691	0.0491942	0.277752
YGR084C	545.062	0.0644206	0.0904306	0.712376	0.476232	0.820219
YNR030W	358.661	0.111565	0.128136	0.87068	0.383929	0.762324
YML007C-A	2.52617	1.90525	1.09029	1.74747	0.0805551	0.365752
YBR018C	36582.1	0.0663575	0.105389	0.629645	0.528927	0.851632
YKL076C	73.9053	-0.0483498	0.251831	-0.191993	0.847748	0.962664
YDR466W	634.492	-0.0345446	0.122812	-0.281281	0.778495	0.946722
YFR045W	192.114	0.138677	0.133463	1.03907	0.298773	0.688522
YIL002C	452.928	-0.0589458	0.137097	-0.429958	0.667227	0.909282
YGR159C	15377.4	-0.00394475	0.129768	-0.0303985	0.975749	0.995848
YLR369W	423.417	-0.0407107	0.106075	-0.383791	0.701133	0.922618
YFR032C	57.4532	-0.809948	0.396484	-2.04283	0.0410695	0.246942
YNL118C	932.271	0.0599287	0.127373	0.470499	0.637998	0.896712
YGL228W	865.735	0.00728606	0.0950404	0.0766628	0.938892	0.985985
YJR117W	758.031	0.188116	0.131517	1.43036	0.152615	0.513676
YBR196C-A	4.76794	-0.456342	0.839224	-0.543767	0.586602	0.871486
YBR196C-B	5.73465	0.399152	0.667368	0.598098	0.549774	0.862643
YIL030W-A	25.3282	0.113112	0.300636	0.376243	0.706737	0.92464
YLR357W	702.015	-0.0458657	0.113442	-0.404308	0.685986	0.916041
YER127W	1006.35	-0.133684	0.113904	-1.17365	0.240537	0.632833
YBL015W	1220.51	-2.28474	0.158033	-14.4574	2.25186e-47	4.91308e-45
YLR017W	980.917	-6.19105e-05	0.153541	-0.000403217	0.999678	0.999912
YHR110W	317.16	0.0964905	0.132048	0.730724	0.464948	0.813098
YBR041W	465.391	-0.0835133	0.134444	-0.621175	0.534484	0.855012
YOR394W	9.26589	0.074013	0.519289	0.142528	0.886663	0.971334
YDL220C	151.266	0.00321414	0.166004	0.0193618	0.984552	0.997024
YDL039C	2247	-0.101912	0.201045	-0.50691	0.612218	0.882917
YKL202W	9.41206	-0.375864	0.50246	-0.748048	0.454431	0.809499
YGR122C-A	2.17082	-0.254004	1.01747	-0.249643	0.802864	0.951865
YOR264W	963.643	0.447523	0.101212	4.42166	9.79468e-06	0.000268321
YNL042W-B	1.4381	2.17073	1.45202	1.49497	0.134923	NA
YBL029C-A	156.294	0.0334506	0.163451	0.204652	0.837844	0.961157
YOR008W-B	10.5288	-0.0339926	0.505682	-0.0672213	0.946406	0.988237
YOR366W	6.47771	0.511882	0.622992	0.82165	0.411276	0.779066
YNL275W	274.231	-0.0467706	0.149729	-0.312369	0.75476	0.941366
YAR015W	1249.25	0.085068	0.190468	0.446626	0.655145	0.902635
YOR384W	2.81344	-1.32379	0.987345	-1.34075	0.18	0.559919
YLL051C	491.277	-0.00230087	0.119891	-0.0191914	0.984688	0.997024
YDR427W	741.093	0.0956679	0.237945	0.402058	0.687641	0.917005
YLR079W	827.898	0.309515	0.106117	2.91673	0.00353726	0.0424541
YLR408C	47.482	0.0812631	0.249788	0.325329	0.744932	0.939419
YMR093W	1243.93	-0.122808	0.0961348	-1.27746	0.20144	0.583221
YDR079W	169.806	0.146321	0.139761	1.04694	0.295129	0.688522
YMR268C	216.434	-0.0651668	0.164444	-0.396286	0.691894	0.919095
YOR169C	1.66999	0.259978	1.17157	0.221905	0.824388	NA
YML070W	1064.16	0.202186	0.0916442	2.20621	0.0273693	0.195742
YHR175W-A	9.52078	-0.447638	0.724075	-0.61822	0.53643	0.856522
YPR072W	719.119	0.00104685	0.104144	0.010052	0.99198	0.997596
YMR108W	9106.74	-0.436979	0.110218	-3.96467	7.34973e-05	0.00156991
YCR091W	151.156	0.469577	0.141974	3.30748	0.000941398	0.0149377
YER062C	5667.67	0.199244	0.184889	1.07764	0.281195	0.678176
YDR244W	450.277	0.0805868	0.103142	0.781319	0.434615	0.795167
YER189W	58.5774	0.0493663	0.252367	0.195613	0.844913	0.962099
YDL137W	1946.05	-0.0674561	0.121473	-0.555316	0.578679	0.86839
YGR271W	469.901	-0.121254	0.176611	-0.686557	0.492362	0.831731
YDR233C	5051.91	0.00793343	0.118751	0.0668073	0.946735	0.988275
YGR071C	268.758	0.078517	0.287282	0.273309	0.784615	0.948306
YCR106W	75.7422	-0.983429	0.220136	-4.46738	7.91849e-06	0.000221899
YER109C	351.271	-0.11466	0.113061	-1.01414	0.310516	0.699979
YDR489W	214.71	0.144315	0.159575	0.904371	0.365799	0.747355
YPR049C	454.342	0.155596	0.165721	0.938906	0.347779	0.731904
YDL057W	174.466	0.308108	0.137952	2.23344	0.0255198	0.187832
YGR257C	427.795	0.038097	0.112555	0.338473	0.735007	0.937011
YEL045C	13.6174	0.0982972	0.48751	0.201631	0.840205	0.961157
YPL235W	928.988	-0.158375	0.0906582	-1.74695	0.0806462	0.365752
YLR122C	15.3669	0.187829	0.446746	0.420439	0.674165	0.9123
YBL087C	3295.31	-0.311776	0.162997	-1.91278	0.0557767	0.300476
YJL132W	205.65	0.571026	0.159266	3.58537	0.000336607	0.00613831
YGL190C	572.423	-0.00273886	0.198737	-0.0137813	0.989004	0.997596
YBR110W	470.259	-0.274195	0.123291	-2.22397	0.0261507	0.190201
YDR144C	330.392	-0.197219	0.161927	-1.21795	0.223244	0.613218
YFL046W	218.825	-0.220669	0.137359	-1.60651	0.108163	0.42879
YOR103C	156.971	-0.137718	0.299545	-0.459756	0.645691	0.900351
YKL137W	309.724	-0.104919	0.116037	-0.904181	0.3659	0.747355
YDR447C	4788.75	-0.368517	0.142946	-2.57801	0.00993698	0.0948516
YGL009C	4837.37	-0.592299	0.179444	-3.30074	0.000964305	0.0151828
YPR145W	4715.65	-1.12358	0.125517	-8.95161	3.50341e-19	3.24278e-17
YJL063C	597.563	-0.049567	0.144744	-0.342447	0.732015	0.935478
YMR149W	637.017	-0.141527	0.11711	-1.2085	0.226854	0.61794
YIR010W	412.932	-0.0470782	0.112792	-0.417389	0.676394	0.9123
YDR331W	315.622	-0.23641	0.125572	-1.88267	0.0597454	0.313462
YJL114W	3.67159	-1.36086	1.01979	-1.33445	0.182056	0.560858
YKR044W	382.352	-0.139903	0.140899	-0.992933	0.320742	0.708137
YLR433C	321.597	0.00141696	0.112167	0.0126326	0.989921	0.997596
YMR068W	111.405	0.29023	0.180717	1.606	0.108275	0.428956
YLR157C-B	24.6271	-2.96706	2.74175	-1.08218	0.279174	0.675702
YNL164C	339.346	-0.153762	0.115316	-1.33339	0.182402	0.561641
YER032W	328.94	0.132975	0.124187	1.07077	0.284273	0.680308
YJR070C	2300.09	-0.142165	0.176172	-0.806966	0.419686	0.78376
YGL005C	480.293	-0.00732038	0.153792	-0.0475992	0.962036	0.991489
YHR043C	783.821	-0.0153431	0.12123	-0.126561	0.899288	0.974064
YDL111C	839.743	-0.119034	0.117334	-1.01449	0.310349	0.699979
YMR133W	5.25009	0.278754	0.673021	0.414184	0.678739	0.913509
YPL007C	171.746	-0.235082	0.22832	-1.02962	0.30319	0.693194
YKL159C	91.4836	-0.0716525	0.175558	-0.408142	0.683169	0.914831
YDR507C	700.373	0.162008	0.155346	1.04288	0.297002	0.688522
YKR075W-A	1.22795	-0.658329	1.50268	-0.438104	0.661311	NA
YLR138W	1258.58	0.0202669	0.0875443	0.231504	0.816923	0.957671
YBR101C	597.937	-0.0523142	0.102545	-0.510161	0.609939	0.882757
YLR396C	286.73	-0.00388753	0.131147	-0.0296426	0.976352	0.995848
YBR245C	647.262	-0.0730762	0.13167	-0.554996	0.578898	0.86839
YJL216C	82.6995	0.0829587	0.191244	0.433784	0.664445	0.907611
YBR210W	101.712	-0.152699	0.191706	-0.796527	0.425726	0.789304
YPL103C	293.334	-0.0943323	0.150457	-0.626973	0.530677	0.852909
YIL103W	461.744	-0.0175456	0.104593	-0.167752	0.866779	0.968898
YIL152W	136.378	0.262239	0.185406	1.4144	0.157244	0.522921
YJR096W	368.417	0.51284	0.153239	3.34668	0.00081787	0.013183
YAL010C	183.381	0.0675186	0.159493	0.423332	0.672053	0.912015
YGR143W	1182.57	0.162006	0.150767	1.07455	0.282577	0.679632
YGR112W	251.744	0.19712	0.123411	1.59727	0.110205	0.433275
YLR256W	1428.11	-0.102701	0.270202	-0.380092	0.703877	0.923934
YHR174W	43523.1	0.260824	0.146726	1.77763	0.0754654	0.353
YOR012W	34.1965	-0.124098	0.304178	-0.40798	0.683288	0.914831
YIR001C	376.608	-0.241598	0.108796	-2.22066	0.0263739	0.190672
YDL213C	925.802	-0.0963388	0.179754	-0.53595	0.591993	0.874614
YDR317W	43.2266	-0.0613063	0.269643	-0.227361	0.820143	0.958242
YDR478W	117.268	-0.0769356	0.188166	-0.408871	0.682634	0.914721
YNL106C	341.416	0.0356274	0.122047	0.291915	0.770352	0.946036
YOR378W	19.614	-0.678921	0.363833	-1.86602	0.0620381	0.319823
YFR015C	168.747	0.977723	0.15793	6.19087	5.98333e-10	3.29299e-08
YMR230W	3869.87	-0.288847	0.129783	-2.22562	0.0260399	0.190057
YIL092W	243.591	0.147636	0.141594	1.04267	0.2971	0.688522
YAR009C	8265.52	-0.148205	0.126578	-1.17086	0.241654	0.633675
YLR321C	429.655	-0.0839495	0.113634	-0.738772	0.460046	0.810083
YBR004C	335.626	-0.0648001	0.269196	-0.240717	0.809775	0.953866
YGR052W	97.358	0.389119	0.19074	2.04005	0.0413453	0.247869
YJR161C	323.39	0.325793	0.147955	2.20198	0.027667	0.196532
YOR278W	161.349	-0.0451575	0.129917	-0.347589	0.728149	0.93392
YNL085W	932.576	-0.1311	0.22017	-0.595448	0.551544	0.862643
YGL061C	87.6108	-0.347986	0.225169	-1.54545	0.122239	0.457571
YPL210C	1131.62	-0.104434	0.123329	-0.846792	0.397111	0.770444
tS(AGA)G	1.39762	-0.418254	1.43813	-0.290831	0.771181	NA
YOR087W	338.642	-0.12068	0.131766	-0.915867	0.359737	0.742274
YGL234W	2887.78	-0.0367013	0.155831	-0.235521	0.813805	0.955329
YOR347C	226.688	0.406529	0.137116	2.96486	0.00302822	0.0378311
YPR093C	170.378	0.308315	0.205119	1.50311	0.132812	0.479519
YAL029C	1222.68	-0.0296635	0.152874	-0.194039	0.846146	0.962111
YOL155C	1096.13	0.959867	0.203667	4.71293	2.44177e-06	7.57197e-05
YDR421W	365.204	-0.445384	0.0998242	-4.46168	8.13187e-06	0.000226838
YGR186W	1052.86	-0.117239	0.0919949	-1.27441	0.20252	0.584961
YDR294C	784.577	0.0931159	0.0922285	1.00962	0.312676	0.701405
YHR135C	890.207	-0.0498588	0.118887	-0.419378	0.67494	0.9123
YBR181C	8481.36	-0.316394	0.16349	-1.93525	0.0529593	0.293046
YOR078W	1012.4	-0.188482	0.112403	-1.67685	0.0935714	0.394771
YOR243C	1319.97	-0.103836	0.0989265	-1.04963	0.293887	0.688253
YMR165C	474.609	0.0903616	0.108593	0.832113	0.405345	0.775019
YCR005C	1476.87	1.30257	0.188064	6.92622	4.32249e-12	2.87023e-10
YPR055W	274.572	0.0625267	0.25651	0.243759	0.807417	0.953279
YIL016W	197.079	-0.310879	0.149245	-2.08301	0.0372502	0.23348
YLR032W	328.841	0.230011	0.134694	1.70765	0.087701	0.381328
YPR046W	67.0857	-0.129136	0.248218	-0.520253	0.602887	0.879637
YBR099C	6.30925	-0.348458	0.632107	-0.551265	0.581452	0.86839
YBL027W	8477.59	-0.306986	0.163939	-1.87256	0.061129	0.317549
YOL060C	610.849	0.117742	0.119383	0.98625	0.32401	0.711947
YOR382W	155.101	-0.370072	0.202485	-1.82765	0.0676017	0.333047
YNL232W	734.533	-0.0285032	0.120479	-0.236582	0.812981	0.955097
YDL076C	231.906	0.178947	0.137008	1.30611	0.191514	0.570314
YDR120C	1398.56	-0.14068	0.115302	-1.22011	0.222424	0.612068
YLR465C	11.2449	-0.474514	0.503548	-0.942341	0.346018	0.731174
YJL192C	493.596	-0.0539909	0.104306	-0.517619	0.604724	0.880078
YEL020C-B	2.70047	0.351889	0.935607	0.376107	0.706837	0.92464
YLR054C	24.1217	0.155544	0.302516	0.514168	0.607135	0.882011
YLR009W	2281.91	-0.148576	0.138929	-1.06944	0.284872	0.680308
YKL116C	287.824	0.10972	0.106264	1.03252	0.301826	0.692659
YOR292C	86.4234	-0.0261865	0.278124	-0.0941541	0.924987	0.983072
YLR423C	114.724	0.280133	0.213782	1.31037	0.190071	0.569189
YLR105C	352.058	0.0803807	0.131193	0.61269	0.540081	0.858867
YML091C	2951.76	-2.19236	0.236233	-9.28051	1.68664e-20	1.66188e-18
YHR191C	94.1682	-0.0970078	0.18562	-0.522614	0.601243	0.878916
YDL098C	106.47	0.00848656	0.155336	0.0546337	0.95643	0.991279
YLR202C	30.5063	0.285095	0.312353	0.912733	0.361383	0.744332
YKR005C	138.694	0.0346984	0.141545	0.245141	0.806347	0.952762
YMR143W	4972.38	-0.34086	0.135904	-2.5081	0.0121383	0.109694
YCR063W	72.855	0.520245	0.198857	2.61617	0.00889211	0.0867762
YNL189W	2021.22	-0.0151721	0.0739872	-0.205064	0.837522	0.961157
YFR024C-A	774.103	0.187747	0.116664	1.6093	0.10755	0.427856
YCL047C	138.83	-0.290098	0.175386	-1.65405	0.0981167	0.404824
YGL122C	1229.04	0.0448309	0.110196	0.40683	0.684133	0.915239
YDL018C	88.5911	0.295923	0.203162	1.45658	0.145232	0.49847
YOR120W	6474.08	0.188893	0.091174	2.07179	0.038285	0.237445
YPR160W	2408.88	0.475546	0.21929	2.16857	0.0301151	0.20565
YBL060W	410.951	-0.1207	0.132834	-0.908654	0.363533	0.746997
YDR065W	155.485	0.0871898	0.182165	0.478632	0.632201	0.893801
YBR019C	68118.7	0.0572143	0.0985787	0.580392	0.56165	0.863626
YKL056C	9768.94	-0.281392	0.137249	-2.05023	0.0403423	0.244981
YKL065W-A	138.636	0.328669	0.296719	1.10768	0.268001	0.661771
YGR160W	28.1497	-0.0264138	0.515957	-0.0511939	0.959171	0.991489
YPL068C	264.721	-0.00184204	0.146557	-0.0125687	0.989972	0.997596
YJR057W	190.17	0.0802757	0.145792	0.550618	0.581896	0.86839
YGL211W	626.492	0.0329747	0.122871	0.268369	0.788415	0.948944
YFL032W	1.74301	-0.746809	1.27149	-0.587348	0.55697	NA
YPL195W	624.706	-0.103048	0.193209	-0.533348	0.593793	0.875779
YCL044C	354.133	0.123697	0.110656	1.11785	0.263629	0.658965
YAL059W	479.049	-0.218652	0.206549	-1.0586	0.289783	0.684265
YNL007C	673.228	0.637996	0.179652	3.5513	0.00038334	0.00680762
YPL148C	148.034	-0.01249	0.184615	-0.0676546	0.946061	0.988237
YJR137C	531.135	0.233938	0.160545	1.45715	0.145074	0.49847
YMR021C	212.674	0.0145197	0.124267	0.116842	0.906985	0.975791
YMR074C	389.501	-0.107204	0.111494	-0.961524	0.336289	0.722285
YGR203W	116.774	0.0408843	0.207922	0.196633	0.844115	0.962099
YJR039W	136.816	0.16047	0.194956	0.823107	0.410447	0.77846
YDL158C	14.1216	-0.0511512	0.685668	-0.0746005	0.940533	0.985985
YOR104W	282.835	0.102171	0.114987	0.888541	0.37425	0.754121
YFL009W	590.24	0.0696988	0.0979468	0.711599	0.476713	0.820812
YLR297W	166.171	-0.0768187	0.188308	-0.407943	0.683316	0.914831
YDR216W	1485.32	-0.0958416	0.254457	-0.376651	0.706433	0.92464
YIL120W	154.108	0.080131	0.143457	0.558571	0.576454	0.868229
YBR030W	366.966	-0.0337456	0.102924	-0.327868	0.743011	0.939099
YPL162C	188.906	-0.175518	0.150656	-1.16503	0.244009	0.63808
YGR095C	563.805	0.00103834	0.139105	0.00746445	0.994044	0.998708
YCL027W	64.3543	-0.585355	0.282482	-2.07219	0.0382482	0.237445
snR5	15.3407	-0.354863	0.466241	-0.761116	0.446588	0.805977
snR4	95.2257	0.0418726	0.264561	0.158272	0.874242	0.971194
snR9	23.8619	-0.185493	0.334016	-0.555344	0.57866	0.86839
snR8	8.81791	-0.595047	0.55598	-1.07027	0.284499	0.680308
YHR029C	176.893	-0.124348	0.157849	-0.787769	0.430832	0.792483
YAL033W	161.987	-0.392774	0.169631	-2.31546	0.020588	0.161246
YNL130C	301.068	0.234973	0.150462	1.56167	0.118365	0.448291
YNR036C	647.728	0.175283	0.15379	1.13975	0.254389	0.648613
YNR049C	273.099	-0.0640368	0.148394	-0.431532	0.666082	0.908685
YDR192C	243.872	-0.0449175	0.135671	-0.331078	0.740586	0.938853
YOL112W	605.609	-0.155245	0.106775	-1.45395	0.145962	0.49982
YML109W	368.495	-0.0682992	0.13003	-0.525258	0.599404	0.877909
YOL083W	270.308	0.402138	0.147922	2.71859	0.0065561	0.0686284
YNL251C	879.54	-0.0896247	0.10646	-0.841866	0.399863	0.772495
YBR266C	2.10839	0.241502	1.23738	0.195171	0.845259	0.962099
YBL004W	1210.01	-0.178097	0.159782	-1.11463	0.265011	0.660257
YER145C-A	4.02533	-0.868994	0.803902	-1.08097	0.279711	0.676496
YBR164C	355.997	-0.199983	0.113509	-1.76182	0.0781001	0.358732
YHR074W	808.661	0.0594643	0.0991587	0.599689	0.548714	0.862643
YDR464W	975.871	-0.0130285	0.100034	-0.130241	0.896376	0.97264
YFR030W	693.3	0.113124	0.132629	0.852932	0.393697	0.769137
YJL146W	228.253	0.0453354	0.142695	0.317708	0.750706	0.940564
YKL078W	836.13	-0.047758	0.11526	-0.414348	0.678619	0.913509
YIL055C	211.793	0.584524	0.124345	4.70083	2.59106e-06	7.87502e-05
YPL053C	921.176	-0.0222452	0.0834928	-0.266433	0.789906	0.948982
YLR351C	562.338	-0.0289239	0.122466	-0.236179	0.813294	0.95528
YEL009C-A	4.59185	-0.268378	0.753885	-0.355993	0.721845	0.932146
YJR111C	439.78	-0.0216857	0.117702	-0.184243	0.853823	0.964478
YIL030C	1133.05	0.0814362	0.167892	0.48505	0.627641	0.891189
YER125W	1130.6	-0.0290232	0.124511	-0.233098	0.815685	0.957353
YER152C	610.948	0.383911	0.174167	2.20428	0.0275048	0.195971
YLR015W	326.692	-0.0140199	0.145739	-0.0961987	0.923363	0.982735
YHR116W	162.283	0.262552	0.182842	1.43595	0.151016	0.509417
YPL259C	387.847	-0.155283	0.143876	-1.07928	0.280462	0.67721
YOL100W	747.808	-0.0424331	0.116829	-0.363206	0.716451	0.930078
YOR039W	454.039	-0.0869073	0.0930244	-0.934242	0.350179	0.732326
YDL037C	803.087	-0.0361829	0.288635	-0.125359	0.900239	0.974064
YLR334C	2.723	-1.38077	1.15055	-1.2001	0.230101	0.622156
YOR364W	2.65625	0.690209	0.906888	0.761074	0.446613	0.805977
YOR386W	103.318	0.462747	0.217288	2.12965	0.0332004	0.216227
YAR042W	1101.81	0.197204	0.112883	1.74698	0.0806407	0.365752
YPR198W	417.141	0.0271137	0.19009	0.142637	0.886577	0.971334
YHL038C	243.67	-0.156135	0.139162	-1.12197	0.261876	0.656569
YLL053C	526.678	-2.37544	0.214126	-11.0936	1.34689e-28	1.67921e-26
YDR425W	151.396	0.141548	0.247153	0.572713	0.566839	0.865002
YOR331C	4.36765	0.243897	0.939579	0.259581	0.795187	0.950749
YML076C	378.634	0.0475628	0.129438	0.367456	0.713279	0.928125
YKR060W	296.774	-0.022623	0.110032	-0.205604	0.8371	0.961157
YHR094C	8.82766	0.493649	0.502384	0.982612	0.325798	0.712201
YER069W	4589.95	-0.156396	0.111606	-1.40133	0.161117	0.530129
YMR091C	518.733	-0.0986247	0.119736	-0.823684	0.410119	0.778152
YER012W	795.555	0.319782	0.0805591	3.96954	7.20126e-05	0.0015436
YHR098C	926.054	0.0340047	0.116689	0.291413	0.770736	0.946036
YDL135C	308.471	-0.0658564	0.122066	-0.539516	0.589531	0.872816
YCR093W	964.393	-0.022119	0.20916	-0.105752	0.915779	0.980115
YGR273C	2.60223	-0.842961	0.911776	-0.924526	0.355212	0.73664
YGL080W	244.471	-0.00721838	0.128693	-0.0560897	0.95527	0.990957
YBR069C	6318.68	-0.0011188	0.107511	-0.0104064	0.991697	0.997596
YGR077C	441.212	-0.0218755	0.139534	-0.156775	0.875422	0.971334
YDR040C	967.127	0.17783	0.190624	0.932886	0.350879	0.733078
YPR012W	6.02341	-1.30621	0.709908	-1.83997	0.0657728	0.328327
YGR255C	405.419	0.29264	0.111309	2.62908	0.00856163	0.084496
YDL051W	1833.32	-0.176245	0.118971	-1.48142	0.138496	0.488493
YBL102W	277.036	-0.202036	0.115478	-1.74957	0.0801924	0.364777
tM(CAU)P	3.2209	0.17473	0.854452	0.204494	0.837967	0.961157
YPL237W	2334.05	-0.0829163	0.127048	-0.652639	0.513989	0.84354
YLR120C	578.209	0.196121	0.148173	1.32359	0.185638	0.564209
YCL001W-B	5.45014	0.19496	0.671727	0.290236	0.771635	0.946265
YCL001W-A	4.60455	-0.425009	0.932704	-0.455674	0.648624	0.900351
YNL068C	712.02	-0.101203	0.123566	-0.819019	0.412775	0.780146
YBL002W	352.259	0.0412689	0.112619	0.366447	0.714032	0.928484
YDR146C	367.578	0.129681	0.132333	0.979963	0.327105	0.713927
YBR112C	1221.93	-0.0446096	0.125802	-0.354603	0.722887	0.932358
YBL081W	790.462	-0.100901	0.0938261	-1.0754	0.282195	0.679445
YFL040W	4.36336	-1.13709	0.790136	-1.43911	0.150119	0.508077
YNL326C	285.274	-0.0466681	0.105339	-0.443026	0.657747	0.904531
YDR337W	426.628	0.177834	0.107677	1.65155	0.0986255	0.405986
YJL061W	494.394	0.0128921	0.135605	0.095071	0.924258	0.982735
YPR147C	245.784	-0.0406089	0.114515	-0.354617	0.722877	0.932358
YKL131W	2.62329	0.868026	0.925057	0.938349	0.348065	0.731904
YDR441C	713.127	0.00672597	0.150753	0.0446159	0.964414	0.991489
YPL094C	1156.27	-0.156604	0.151967	-1.03051	0.30277	0.693194
YOR101W	1241.19	-0.0249257	0.154393	-0.161443	0.871744	0.97021
YER020W	386.633	0.187838	0.15508	1.21123	0.225806	0.616929
YDR231C	213.69	-0.600798	0.121735	-4.93531	8.00235e-07	2.74642e-05
YJL112W	827.758	-0.399307	0.141845	-2.81511	0.00487613	0.0545573
YFL066C	121.603	0.969335	1.14001	0.850283	0.395168	0.769137
YNL193W	172.81	0.264905	0.154694	1.71245	0.0868145	0.380179
YML058W	743.432	0.0525233	0.11595	0.452983	0.650561	0.90113
YBR188C	161.03	0.0024429	0.157265	0.0155337	0.987606	0.997596
YLR435W	408.445	-0.177395	0.14223	-1.24724	0.212309	0.600524
YJR076C	621.129	0.0360167	0.0925809	0.389029	0.697254	0.921377
YKL157W	1533.98	-0.0284847	0.115907	-0.245755	0.805872	0.952607
YBR003W	342.646	0.0116735	0.122921	0.0949673	0.924341	0.982735
YPR129W	684.233	0.011141	0.09043	0.1232	0.901948	0.974836
YDL113C	300.864	-0.0278293	0.169303	-0.164375	0.869436	0.969125
YMR135C	416.332	0.380841	0.105076	3.62442	0.000289612	0.00534514
YGL007W	3.00978	-0.386586	0.847722	-0.456029	0.648369	0.900351
YPL005W	191.967	0.032519	0.153144	0.212343	0.831839	0.960774
YBR247C	1410.55	-0.115002	0.104726	-1.09812	0.272152	0.668237
YLR185W	3305.37	-0.3506	0.160072	-2.19026	0.0285055	0.19927
YJL210W	260.186	0.208289	0.119551	1.74225	0.0814641	0.368367
YLR398C	768.502	0.0355884	0.139485	0.25514	0.798615	0.9511
YIL154C	308.237	0.204191	0.158261	1.29022	0.196975	0.57575
YIL101C	279.944	0.855831	0.127608	6.70674	1.99027e-11	1.24067e-09
YKL004W	1088.4	0.0457587	0.091659	0.499228	0.617619	0.886222
YPL154C	3486.85	0.468667	0.123105	3.80706	0.000140629	0.00281673
YPL101W	562.271	-0.085619	0.110201	-0.776933	0.437198	0.796791
YLR258W	678.902	0.640858	0.17015	3.76644	0.000165593	0.00326326
YJR098C	109.767	0.0953685	0.195408	0.488049	0.625515	0.890089
YHR176W	146.847	0.0496035	0.155098	0.31982	0.749105	0.940564
YJR018W	7.24547	-0.359102	0.686407	-0.523162	0.600862	0.878787
YDL244W	38.7971	0.688463	0.29747	2.3144	0.0206459	0.161286
YDR319C	118.938	-0.177776	0.257437	-0.690564	0.48984	0.828928
YKL095W	236.134	0.185714	0.138277	1.34306	0.179252	0.559592
YOL099C	3.15234	0.34724	0.891962	0.389299	0.697055	0.921377
YIL094C	1599.1	-0.15045	0.19565	-0.768974	0.441909	0.801312
YLR451W	668.902	-0.0715258	0.0909451	-0.786472	0.431591	0.792483
YFR017C	151.95	0.400899	0.15653	2.56117	0.010432	0.0982948
YLR342W-A	3.20201	0.133607	0.956138	0.139736	0.888869	0.971564
YIL076W	791.529	0.167118	0.0985423	1.6959	0.0899045	0.386235
YOL044W	256.057	0.0861729	0.151273	0.569652	0.568914	0.865711
YLR323C	175.765	0.0259923	0.182546	0.142387	0.886774	0.971334
YOR085W	551.509	-0.0469538	0.112449	-0.417558	0.67627	0.9123
YGR054W	2549.7	0.0497995	0.0977002	0.509717	0.61025	0.882796
YOR050C	2.12459	-0.262393	0.969887	-0.27054	0.786745	0.948909
YNL087W	805.092	-0.330148	0.0859575	-3.84083	0.000122621	0.00249698
YLR318W	207.034	-0.012793	0.241687	-0.0529319	0.957786	0.991489
YBR278W	129.729	0.169272	0.237092	0.713948	0.475259	0.819935
YNL024C-A	212.471	-0.226647	0.161193	-1.40606	0.159707	0.528189
YDR296W	599.679	0.0609686	0.135996	0.448311	0.653929	0.902503
YGL232W	297.658	-0.11594	0.175079	-0.662219	0.507831	0.840971
YPR091C	519.777	-0.107161	0.137756	-0.777909	0.436623	0.796217
YGR141W	301.611	0.130538	0.114867	1.13643	0.255777	0.650328
YAR030C	5.55389	0.254725	0.632773	0.402554	0.687276	0.916718
YGL111W	970.992	-0.101381	0.113667	-0.891911	0.372441	0.752892
YHR137W	2400.61	-0.980867	0.160784	-6.10051	1.05728e-09	5.71588e-08
YFL011W	13.8685	0.304512	0.439268	0.693226	0.488167	0.828163
YMR198W	143.412	0.263389	0.158728	1.65937	0.0970419	0.402737
YCR003W	327.083	0.0587832	0.129304	0.454611	0.649389	0.900594
YMR316C-B	43.2866	-0.0992512	0.263446	-0.376742	0.706365	0.92464
YDR342C	6443.15	-0.085405	0.217497	-0.392672	0.694562	0.920607
YMR163C	156.133	-0.0935118	0.188845	-0.495178	0.620474	0.888538
YGR294W	8.20397	-0.395768	0.517	-0.765509	0.443969	0.803071
YEL008W	4.24188	0.535583	0.845622	0.63336	0.526498	0.850173
YLL067C	61.0699	2.02932	2.362	0.859153	0.390256	0.767818
YBR020W	66482.8	-0.0196403	0.096934	-0.202615	0.839436	0.961157
YLR418C	384.669	-0.0571266	0.104164	-0.548432	0.583396	0.868836
YER059W	332.595	0.0691939	0.112075	0.617392	0.536976	0.85717
YNL076W	645.978	-0.0504102	0.0958006	-0.5262	0.59875	0.877871
YBL025W	101.627	-0.212709	0.160932	-1.32173	0.186258	0.564713
YOL066C	477.897	-0.112787	0.115827	-0.973754	0.330179	0.717305
YDR126W	123.804	-0.155904	0.155309	-1.00383	0.315461	0.704625
YPL216W	243.426	0.105975	0.136165	0.778283	0.436402	0.796217
YOR223W	102.72	0.0133783	0.169578	0.0788916	0.937119	0.985663
YEL022W	513.492	-0.178929	0.1845	-0.969805	0.332143	0.718349
YHR072W	1365.13	0.145439	0.0966535	1.50475	0.132388	0.479122
YOL019W	899.401	0.176601	0.0844213	2.09191	0.0364469	0.232029
YLR463C	30.6823	-0.111607	0.409422	-0.272597	0.785163	0.948306
YJL190C	4524.29	-0.357009	0.165552	-2.15648	0.0310459	0.208876
YMR218C	341.104	-0.0794524	0.16418	-0.483935	0.628432	0.891189
YNL265C	330.397	0.0721917	0.101706	0.709808	0.477823	0.821207
YNL230C	156.908	0.343258	0.17854	1.92258	0.0545326	0.296124
YLL049W	162.476	0.0573429	0.163779	0.350124	0.726245	0.933046
YHR211W	342.165	-0.0659085	0.160933	-0.409539	0.682144	0.914698
YPR166C	241.307	-0.105849	0.148163	-0.714411	0.474973	0.819935
YJL042W	730.818	0.0888159	0.155026	0.57291	0.566706	0.865002
YNL301C	1503.06	-0.142605	0.0890374	-1.60163	0.109238	0.432154
YDR333C	651.335	-0.000418744	0.130345	-0.00321257	0.997437	0.999766
YMR058W	838.051	-1.51682	0.140405	-10.8032	3.32471e-27	3.98248e-25
YDR061W	426.219	0.170641	0.093181	1.83129	0.067058	0.331975
YJR112W-A	163.224	-0.21347	0.182007	-1.17287	0.24085	0.632971
YOR290C	825.198	-0.167239	0.133163	-1.2559	0.209154	0.595396
YKL114C	515.977	0.080288	0.100629	0.797861	0.424951	0.788346
YML024W	6080.41	-0.36327	0.141918	-2.55971	0.010476	0.098458
YML093W	2051.39	-0.131381	0.103684	-1.26713	0.205109	0.588544
YHR197W	1132.76	-0.124403	0.150199	-0.828252	0.407528	0.775814
YDR276C	1290.87	0.0581622	0.0913352	0.636799	0.524256	0.848188
YLR200W	279.692	0.0458819	0.124627	0.368153	0.712759	0.928125
YKR003W	245.506	0.123671	0.143801	0.860016	0.38978	0.767818
YLR107W	819.014	0.246811	0.136057	1.81402	0.0696747	0.337691
YMR321C	12.7395	-1.26973	2.20511	-0.575813	0.564742	0.864854
YER175C	253.252	-0.0387235	0.119233	-0.324772	0.745354	0.939419
YIR012W	1778.32	-0.087115	0.135246	-0.644125	0.519495	0.844594
YDL183C	186.326	0.208813	0.163954	1.27361	0.202802	0.585392
YPL278C	188.926	-0.13777	0.161818	-0.851386	0.394555	0.769137
YMR118C	105.104	1.2958	0.321831	4.02635	5.66503e-05	0.00126463
YCL049C	832.297	0.167983	0.148347	1.13237	0.257479	0.65234
YBL066C	853.457	-1.04608	0.175718	-5.95316	2.63012e-09	1.36165e-07
YGL120C	3001.77	-0.0697564	0.130199	-0.535766	0.59212	0.874614
YGR271C-A	542.395	-0.318787	0.182079	-1.75082	0.0799774	0.364246
YDR169C	589.571	0.0781564	0.115273	0.678009	0.497766	0.83546
YOR057W	440.622	-0.10859	0.107598	-1.00922	0.312871	0.701405
YLR410W-A	217.239	0.722643	1.23147	0.586813	0.557329	0.86307
YMR272C	1232.19	0.0857717	0.0996687	0.860568	0.389476	0.767818
YPR108W	1024.26	0.246522	0.108154	2.27935	0.0226463	0.172717
YKL054C	3231.53	0.10399	0.0893266	1.16415	0.244364	0.638229
YGR162W	4796.1	-0.0974902	0.105453	-0.924493	0.35523	0.73664
YDL165W	302.354	0.0554575	0.162231	0.341842	0.732469	0.935533
YDR520C	308.635	0.325485	0.164339	1.98057	0.04764	0.272758
YKL023W	230.314	-0.115333	0.143745	-0.802342	0.422355	0.786157
YJR051W	642.925	-0.124672	0.132352	-0.941974	0.346206	0.731264
YNL009W	207.602	0.15485	0.123551	1.25333	0.210086	0.597494
YFL034W	422.652	0.0149078	0.139594	0.106793	0.914953	0.979574
YKL164C	4249.16	0.489507	0.10984	4.45656	8.32868e-06	0.000231272
YJR135C	82.3111	-0.288254	0.194254	-1.4839	0.137836	0.487574
YGL213C	356.024	-0.0449283	0.123926	-0.362543	0.716946	0.930087
YMR076C	248.126	0.0134185	0.220988	0.0607205	0.951582	0.989652
YNL027W	476.032	-0.136527	0.128582	-1.06179	0.288333	0.682988
YLR291C	504.717	-0.0362136	0.0916026	-0.395334	0.692597	0.919232
YDR210W	112.802	0.0853665	0.186933	0.456668	0.64791	0.900351
YIL122W	516.181	0.138686	0.103696	1.33743	0.181083	0.560371
YDL230W	146.148	0.264674	0.168943	1.56664	0.117198	0.446637
YJR113C	753.345	-0.0218207	0.129423	-0.1686	0.866112	0.968898
YGL075C	144.829	-0.174575	0.133676	-1.30596	0.191567	0.570314
YHR041C	177.363	-0.351474	0.162749	-2.1596	0.0308033	0.208161
YIL156W-B	235.868	-0.1653	0.205377	-0.804861	0.4209	0.784292
YGR097W	2305.41	0.136766	0.0874876	1.56326	0.117991	0.44757
YIL068C	421.365	-0.137239	0.132141	-1.03858	0.299001	0.688522
YCL025C	7076.94	0.0427619	0.177904	0.240365	0.810047	0.953866
YNR034W	200.672	0.344687	0.146938	2.3458	0.0189864	0.151618
YOL085C	1.36534	-0.343492	1.30062	-0.264099	0.791703	NA
YNL282W	155.386	0.176933	0.180777	0.978732	0.327712	0.714998
YBR286W	3495.23	0.356555	0.129532	2.75264	0.0059116	0.0635809
YGL144C	405.95	-0.0533071	0.0965727	-0.55199	0.580955	0.86839
YDR190C	1576.48	-0.0271609	0.0890252	-0.305092	0.760296	0.943125
YAL031C	320.781	0.182694	0.125199	1.45923	0.144502	0.497327
YBL006C	309.041	0.0139935	0.153543	0.0911378	0.927383	0.983139
YNL132W	1738.46	-0.146105	0.110114	-1.32684	0.18456	0.562998
YBR264C	125.375	0.0580909	0.213766	0.27175	0.785814	0.948306
YBR231C	280.593	0.212342	0.134501	1.57874	0.114395	0.441695
YPL197C	4.61948	-0.0217024	0.750633	-0.0289121	0.976935	0.995848
YHR076W	373.464	-0.079637	0.107677	-0.739592	0.459547	0.810083
YDR462W	334.47	0.310957	0.130967	2.37432	0.0175813	0.144555
YJL148W	1251.37	-0.0997392	0.125557	-0.794372	0.426979	0.790481
YIL057C	351.705	0.431011	0.252221	1.70886	0.0874764	0.381165
YPL055C	326.435	0.145822	0.149808	0.973387	0.330361	0.717446
YLR353W	317.772	-0.0877073	0.131171	-0.668649	0.503719	0.840082
YIL020C	200.167	-0.134999	0.12027	-1.12247	0.261662	0.656569
YIL148W	6282.91	-0.285162	0.144694	-1.9708	0.0487471	0.276505
YNR016C	6244.37	0.0941933	0.246807	0.381647	0.702723	0.923609
YFR036W	117.554	0.0188219	0.170716	0.110253	0.912209	0.977414
YHR114W	428.186	0.0680532	0.105182	0.647006	0.517628	0.844594
YGR028W	300.923	0.0836162	0.116385	0.718447	0.472482	0.81809
YER150W	2103.18	0.673293	0.118812	5.66687	1.45431e-08	6.78199e-07
YNL279W	38.6688	-0.376746	0.291542	-1.29225	0.196269	0.574818
YDR400W	205.955	-0.0774668	0.127649	-0.606871	0.543936	0.859585
YOL027C	1745.11	-0.104787	0.0965816	-1.08496	0.277941	0.673424
YPL257W	42.2358	-0.0872609	0.258676	-0.337336	0.735863	0.937643
YPL120W	149.715	-0.162119	0.190306	-0.851885	0.394278	0.769137
YOL145C	1158.58	-0.0950923	0.13021	-0.730297	0.465208	0.81315
YJL099W	373.636	0.295506	0.134365	2.19927	0.0278585	0.197434
YHR149C	695.393	0.061802	0.133095	0.464345	0.6424	0.899432
YDR395W	1406.4	-0.0550136	0.109944	-0.500379	0.616808	0.885838
YOL110W	222.703	0.139712	0.15619	0.894497	0.371056	0.751337
YDR005C	518.286	0.0316441	0.107737	0.293717	0.768974	0.946036
YMR311C	729.163	0.18624	0.112187	1.66009	0.0968956	0.402737
YBL039C	3198.94	-0.118529	0.115289	-1.02811	0.303899	0.693712
YGR188C	148.669	0.238086	0.145377	1.63771	0.101482	0.413272
YOR362C	1272.28	0.284478	0.104911	2.7116	0.00669589	0.0695666
YPR106W	210.054	0.470479	0.173841	2.70638	0.0068022	0.0705256
YLR126C	170.148	-0.128641	0.156094	-0.824125	0.409869	0.778088
YDL053C	625.302	-0.124821	0.106614	-1.17078	0.241687	0.633675
YML074C	1610.13	-0.119132	0.156748	-0.760023	0.447241	0.805977
YKR062W	518.251	-0.0681676	0.123584	-0.551587	0.581231	0.86839
YBR235W	537.123	0.139933	0.0907067	1.54269	0.122905	0.458661
YER010C	221.185	0.222987	0.1288	1.73126	0.0834049	0.372184
YML003W	47.1911	0.136679	0.301138	0.453876	0.649918	0.900807
YMR097C	259.709	-0.0309197	0.111852	-0.276435	0.782214	0.947205
YDL133W	361.362	0.0604278	0.15054	0.401407	0.688121	0.917253
YNL330C	502.818	-0.038851	0.0940926	-0.412901	0.679679	0.913767
YGR228W	11.9937	0.0671075	0.506456	0.132504	0.894586	0.97248
YHR096C	964.748	0.487481	0.141572	3.44334	0.000574582	0.00964319
YBR008C	239.354	0.131674	0.141475	0.930724	0.351997	0.733907
YDL035C	828.138	0.0733542	0.101996	0.719187	0.472026	0.818072
YMR253C	125.953	0.116	0.208564	0.556182	0.578086	0.86839
YCR102C	35.3253	-0.510125	0.423654	-1.20411	0.228548	0.620257
YJL127C-B	231.937	-0.485437	0.151084	-3.21303	0.00131344	0.0193812
YOR257W	258.174	-0.186708	0.132948	-1.40437	0.16021	0.529325
YGR002C	323.129	0.140701	0.12733	1.10502	0.269152	0.66354
YEL041W	106.119	0.265779	0.171437	1.5503	0.121071	0.454183
YGR075C	66.0694	-0.426866	0.241669	-1.76633	0.0773411	0.358339
YGR253C	1196.6	0.262834	0.0804157	3.26844	0.00108143	0.0166463
YDR510W	716.784	0.0254654	0.172542	0.14759	0.882667	0.971334
YPL050C	1104.48	-0.16035	0.0869254	-1.84468	0.0650837	0.327154
YMR166C	205.858	0.0441191	0.122291	0.360771	0.718271	0.930629
YPR045C	302.21	0.0869693	0.132043	0.658643	0.510125	0.84203
YPL231W	6765.66	-0.0428187	0.152098	-0.281521	0.778311	0.946722
YLR148W	336.009	-0.00330534	0.230819	-0.01432	0.988575	0.997596
YMR137C	217.755	0.10145	0.19796	0.512477	0.608317	0.882501
YDL082W	4769.19	-0.31042	0.141226	-2.19805	0.0279459	0.197437
YKL155C	675.775	0.0434319	0.0925998	0.469028	0.639049	0.89746
YBR162W-A	334.703	-0.211826	0.192687	-1.09933	0.271626	0.667751
YFL042C	385.321	0.178341	0.130747	1.36401	0.172564	0.549918
YBL083C	97.5886	-0.268275	0.210746	-1.27298	0.203026	0.585392
YDR148C	3002.89	-1.389	0.0944237	-14.7103	5.5361e-49	1.25259e-46
YHR052W-A	126.702	0.395207	0.230425	1.71512	0.0863223	0.37993
YPL096W	187.991	0.0482974	0.136202	0.354601	0.722888	0.932358
YDR335W	829.427	-0.241498	0.146431	-1.64923	0.0991012	0.406861
YPR141C	145.317	-0.0924302	0.204376	-0.452256	0.651085	0.90113
YMR039C	530.987	-0.293828	0.139401	-2.10779	0.0350495	0.225862
YIL058W	5.52236	0.788628	0.671715	1.17405	0.240374	0.632679
YNL320W	195.131	-0.12022	0.135397	-0.887912	0.374588	0.754121
YPL078C	2451.05	-1.42837	0.0746327	-19.1386	1.20436e-81	9.19678e-79
YCR095C	254.016	-0.129027	0.169354	-0.761881	0.446131	0.805858
YLL011W	1023.98	-0.122076	0.0992894	-1.2295	0.218886	0.606913
YCR077C	1304.33	0.0163112	0.100773	0.16186	0.871416	0.97021
YLR437C	114.034	0.276434	0.189938	1.45539	0.145562	0.499292
YFL064C	97.8653	0.22507	0.291513	0.772075	0.44007	0.799695
YNL191W	346.831	0.302922	0.161993	1.86998	0.0614871	0.318866
YDR237W	491.852	-0.0961342	0.106324	-0.904163	0.365909	0.747355
YJL110C	694.673	-0.0885949	0.11877	-0.745938	0.455705	0.809499
YKR048C	1948.98	-0.0867495	0.133582	-0.649411	0.516073	0.844594
YBR001C	414.628	0.285983	0.125029	2.28733	0.0221766	0.170468
YPL003W	83.0155	0.105548	0.171671	0.614831	0.538666	0.858798
YKL108W	130.086	0.131169	0.177856	0.737501	0.460818	0.810091
YGR110W	213.638	-0.352101	0.135219	-2.60393	0.00921629	0.0889452
YJR074W	252.098	0.293468	0.122026	2.40497	0.016174	0.135352
YPR127W	775.103	0.537792	0.147497	3.64613	0.000266221	0.0049615
YIR028W	10.7951	0.259472	0.468999	0.553246	0.580095	0.86839
YAL012W	1866.79	0.287458	0.127544	2.2538	0.0242086	0.180795
YMR288W	466.519	-0.198175	0.120984	-1.63803	0.101415	0.413272
YIL156W	278.555	-0.020298	0.148299	-0.136872	0.891132	0.971645
YBR241C	328.438	0.699073	0.130277	5.36604	8.0484e-08	3.39087e-06
YHR063W-A	2.67138	-0.395805	0.948345	-0.417364	0.676412	0.9123
YJL212C	43.8109	0.540099	0.301802	1.78958	0.0735219	0.347098
YPL156C	251.355	-0.088997	0.253169	-0.351533	0.725189	0.932485
YNL312W	333.902	0.20803	0.143262	1.4521	0.146475	0.501017
YLR187W	228.275	-0.103115	0.177426	-0.581173	0.561124	0.863626
YDR099W	2248.96	0.0966835	0.102018	0.947709	0.343277	0.728406
YKL133C	348.177	0.20128	0.131829	1.52683	0.126803	0.469016
YHR170W	2980.49	-0.121573	0.128079	-0.949202	0.342518	0.728059
YDR259C	196.672	0.554444	0.174963	3.16893	0.00153004	0.0220448
YKL068W	1121.05	0.0230028	0.0818669	0.280978	0.778727	0.946722
YOR032C	140.985	0.35142	0.191039	1.83952	0.0658389	0.328327
YKL093W	677.762	0.242045	0.0881617	2.74546	0.00604254	0.0645096
YMR002W	1562.91	0.280528	0.0948942	2.95622	0.00311438	0.038828
YLR145W	164.243	-0.218536	0.165007	-1.3244	0.18537	0.564209
YLR261C	97.8653	-0.132945	0.178535	-0.744643	0.456488	0.809499
YDL246C	49.7911	0.411308	1.73065	0.237661	0.812144	0.954848
YER081W	575.292	0.228911	0.124423	1.83979	0.0657996	0.328327
YPL178W	482.751	-0.0105528	0.100716	-0.104777	0.916553	0.980771
YPR202W	103.097	-0.0262525	0.676654	-0.0387976	0.969052	0.993445
YIL096C	533.478	-0.170193	0.16327	-1.04241	0.297223	0.688522
YFR011C	548.392	-1.10566	0.114965	-9.61739	6.75217e-22	6.87484e-20
YIL074C	667.443	0.0746213	0.123127	0.606051	0.544481	0.859685
YGL173C	1625.71	0.00205799	0.107908	0.0190717	0.984784	0.997024
YHL008C	644.099	0.12681	0.110757	1.14494	0.252236	0.646069
YLR457C	151.161	0.142045	0.174935	0.811986	0.4168	0.781301
YNL249C	153.388	0.158595	0.165385	0.958944	0.337587	0.722339
YGR056W	650.134	-0.0384911	0.117509	-0.327559	0.743245	0.939099
YGL065C	211.679	-0.161362	0.189554	-0.851273	0.394618	0.769137
YOR052C	982.011	0.602151	0.122649	4.90953	9.12935e-07	3.08128e-05
YGR116W	1365	-0.123119	0.157406	-0.782174	0.434112	0.794724
YOR343C	46.5753	-1.12925	0.302876	-3.72843	0.000192678	0.00374862
YGL230C	14.9857	0.573666	0.435411	1.31753	0.187662	0.566417
YOL159C	162.463	0.318758	0.1805	1.76597	0.0774003	0.358339
YBR185C	355.918	-0.0733328	0.139273	-0.526538	0.598515	0.877869
YOR010C	44.3392	0.0652439	0.238999	0.272988	0.784862	0.948306
YDR019C	326	0.0899991	0.193961	0.464007	0.642643	0.899432
YBR150C	370.185	0.188336	0.142765	1.31921	0.187099	0.565276
YIR042C	81.4057	0.629248	0.262406	2.39799	0.0164852	0.137392
YER119C	241.598	0.211643	0.181698	1.16481	0.244098	0.63808
YMR196W	823.95	0.465471	0.143644	3.24046	0.00119337	0.0178684
YMR161W	254.108	0.0154493	0.142867	0.108137	0.913887	0.978604
YDR499W	258.257	0.168322	0.152048	1.10703	0.268281	0.662193
YKL068W-A	342.293	-0.175252	0.217218	-0.806804	0.419779	0.78376
YJL133C-A	304.253	0.491787	0.456237	1.07792	0.28107	0.678142
YDL215C	2907.47	0.452863	0.21021	2.15434	0.0312139	0.209775
YJR120W	39.6704	-0.779911	0.388947	-2.00519	0.0449432	0.260492
YLL061W	417.23	0.306259	0.187879	1.63009	0.103083	0.416214
YDR110W	572.159	-0.257499	0.102532	-2.51141	0.0120251	0.109481
YDR419W	266.262	-0.0292188	0.127988	-0.228294	0.819418	0.958242
YOR221C	433.616	0.0561554	0.094356	0.595144	0.551747	0.862643
YPL214C	442.265	0.126738	0.114191	1.10988	0.267052	0.660749
YBL108C-A	12.0049	0.4528	0.503351	0.899572	0.368348	0.750432
YGL165C	3.63486	0.036639	0.923544	0.0396721	0.968355	0.99323
YOL064C	410.193	-0.0533483	0.128302	-0.415802	0.677555	0.912721
YBL023C	504.055	-0.0634379	0.115574	-0.548892	0.583079	0.868576
YOR274W	326.504	-0.18578	0.100044	-1.85699	0.0633119	0.32384
YOR329C	695.8	-0.0055248	0.144196	-0.0383145	0.969437	0.993506
YLR005W	499.733	-0.0298876	0.118382	-0.252468	0.800679	0.951519
YDR124W	30.7471	0.431161	0.324781	1.32754	0.184328	0.562815
YNL267W	621.785	-0.0123922	0.0906982	-0.136631	0.891322	0.971645
YLR461W	3.68825	-0.989104	0.944876	-1.04681	0.295188	0.688522
YLR050C	192.121	0.1195	0.161584	0.739553	0.459571	0.810083
YOR124C	607.637	0.100286	0.165063	0.607559	0.54348	0.859585
YDR067C	187.827	0.0743289	0.15589	0.476802	0.633503	0.8944
YMR056C	413.683	0.0545258	0.142713	0.382066	0.702413	0.923477
YHR032W-A	63.2818	-0.14332	0.201468	-0.71138	0.476849	0.820814
YJL044C	499.023	0.0952604	0.125398	0.759665	0.447455	0.805977
YPR164W	489.103	-0.0845386	0.1449	-0.583427	0.559606	0.863626
YEL060C	2433.83	0.422047	0.16735	2.52194	0.0116709	0.106733
YHR195W	352.236	0.123635	0.127738	0.967878	0.333105	0.719568
YLR101C	6.7946	-0.42617	0.58402	-0.729719	0.465562	0.813314
YBL107W-A	5.67837	0.706839	0.94684	0.746524	0.455351	0.809499
YML026C	6167.06	-0.396937	0.133776	-2.96718	0.00300548	0.037624
YPR066W	57.8305	0.241922	0.267144	0.905589	0.365153	0.747355
YDR073W	281.109	0.0217075	0.146318	0.148359	0.88206	0.971334
YDR229W	355.411	-0.0800319	0.103214	-0.775396	0.438106	0.797256
YDL181W	677.548	-1.74898	0.115519	-15.1402	8.80088e-52	2.33759e-49
YBR022W	168.085	-0.118397	0.139273	-0.850111	0.395263	0.769137
YER177W	6300.22	0.0269615	0.127691	0.211147	0.832772	0.960774
YML048W	1836.51	0.0655871	0.0881482	0.744054	0.456844	0.809499
YBL064C	2282.51	0.0885555	0.137681	0.643192	0.5201	0.844799
YIL045W	52.0836	0.0984727	0.227073	0.433661	0.664534	0.907611
YKL221W	26.5811	0.378683	0.377649	1.00274	0.315987	0.704711
YGL126W	298.542	0.152284	0.163029	0.934094	0.350256	0.732326
YLR167W	16620.7	-0.367066	0.166841	-2.20009	0.0278004	0.19725
YMR270C	303.276	-0.134516	0.122149	-1.10124	0.270792	0.666506
YLR293C	4308.91	-0.121106	0.152415	-0.794581	0.426857	0.790481
YLR228C	194.77	-0.378101	0.127234	-2.9717	0.00296154	0.0372264
YJR053W	91.2649	-0.119201	0.235002	-0.507236	0.611989	0.882796
YJL171C	778.048	0.0404733	0.121764	0.332392	0.739593	0.938744
YDR374C	7.5594	0.809885	0.549076	1.475	0.140214	0.490714
YKL021C	702.298	-0.143919	0.119049	-1.20891	0.226699	0.61794
YDL167C	1155.63	-0.107742	0.079193	-1.3605	0.173672	0.551666
YLR388W	2223.14	-0.415689	0.151836	-2.73775	0.00618616	0.0656098
YLR373C	305.935	-0.165919	0.200803	-0.826277	0.408647	0.776916
YKR001C	1081.25	-0.158715	0.110925	-1.43083	0.15248	0.513507
YKR054C	327.309	-0.00322622	0.123341	-0.0261569	0.979132	0.996422
YIR034C	376.981	0.0898271	0.17261	0.520405	0.602781	0.879637
YGL013C	773.822	0.247891	0.143319	1.72964	0.0836945	0.372932
YJR068W	438.937	-0.0287666	0.13209	-0.21778	0.8276	0.959733
YGR207C	665.89	0.0286097	0.113404	0.252281	0.800824	0.951519
YDR212W	1411.79	0.0436955	0.0743146	0.58798	0.556545	0.862643
YNL052W	2230.59	-2.14811	0.112159	-19.1523	9.25278e-82	8.07503e-79
YGL188C	224.28	-1.64515	0.136505	-12.052	1.894e-33	2.57121e-31
YNL025C	98.9011	0.149184	0.207239	0.719867	0.471607	0.818072
YGR121W-A	1.87706	-0.676793	1.14413	-0.591536	0.554162	NA
YGR091W	236.69	0.0561219	0.115601	0.485478	0.627337	0.891189
YDL232W	67.3051	0.216994	0.250391	0.866621	0.38615	0.764169
YPL119C	223.216	0.656394	0.162621	4.03633	5.42931e-05	0.0012239
YLR242C	53.9723	0.0363348	0.253558	0.1433	0.886053	0.971334
YJR148W	817.189	0.188054	0.140077	1.3425	0.179433	0.559592
YJR082C	311.194	-0.0753108	0.130718	-0.57613	0.564527	0.864854
YOL087C	711.905	0.0822436	0.101679	0.808856	0.418598	0.783461
YNL134C	4046.99	0.148882	0.151621	0.981932	0.326133	0.712201
YAL037W	32.5004	0.14073	0.308783	0.455757	0.648564	0.900351
YGL146C	480.121	-0.76108	0.109385	-6.95781	3.45593e-12	2.32003e-10
YBR262C	480.625	-0.2692	0.192987	-1.39491	0.163042	0.533489
YPL199C	450.849	-0.334321	0.190254	-1.75724	0.0788776	0.361269
YML101C-A	1.82242	0.452884	1.16424	0.388997	0.697278	NA
YFL036W	1585.21	0.0290837	0.107897	0.269551	0.787506	0.948944
YDL209C	256.198	0.074952	0.122936	0.609681	0.542073	0.859211
YIL051C	1378.91	-0.242031	0.133822	-1.8086	0.0705128	0.33902
YPL057C	2242.63	-0.0394581	0.105291	-0.374754	0.707844	0.925341
YNR010W	79.8045	0.0446402	0.18607	0.23991	0.8104	0.953866
YDR365C	1820.79	-0.149423	0.116272	-1.28511	0.198752	0.579007
YLR308W	3.64047	1.33626	0.825658	1.61842	0.105573	0.423469
YNL169C	180.341	0.107623	0.145627	0.739032	0.459888	0.810083
YFR034C	437.572	0.127757	0.131135	0.974237	0.329939	0.717305
YHR070W	817.074	0.0782947	0.140739	0.556311	0.577998	0.86839
YDR460W	278.84	-0.0316315	0.113843	-0.277852	0.781126	0.947205
YNL112W	10065.3	-0.279108	0.231102	-1.20773	0.227153	0.61794
YHL047C	334.578	0.139017	0.121376	1.14535	0.252066	0.646069
YOR360C	2054.73	0.173565	0.173164	1.00232	0.316191	0.704711
YOR335C	4249.01	-0.154143	0.0978511	-1.57528	0.115192	0.442029
YGL251C	228.363	-0.153632	0.160506	-0.957171	0.338481	0.723023
YER156C	951.891	-0.23473	0.1235	-1.90064	0.0573488	0.306285
YPL255W	125.605	0.0990509	0.165247	0.599412	0.548898	0.862643
YOR095C	1290.51	-0.326896	0.10473	-3.12134	0.00180031	0.0254586
YEL038W	464.267	0.238378	0.175877	1.35536	0.175302	0.553624
YCL014W	388.096	-0.0752556	0.138974	-0.541511	0.588156	0.871619
YOL025W	234.177	0.175865	0.170194	1.03332	0.301454	0.692064
YPL208W	212.908	-0.0598635	0.126697	-0.472495	0.636574	0.895837
YOL147C	308.087	0.251997	0.206054	1.22297	0.221342	0.610465
YNL280C	744.773	0.186848	0.109101	1.71261	0.0867836	0.380179
YDR007W	2585.58	2.72602	0.125853	21.6603	4.85785e-104	1.48383e-100
YIL160C	181.722	0.829906	0.211316	3.92733	8.58957e-05	0.00180944
YPR089W	611.255	-0.0490798	0.160418	-0.305949	0.759644	0.943125
YBR233W	184.95	0.0806965	0.166595	0.484387	0.628111	0.891189
YPL122C	283.714	-0.099827	0.160219	-0.623065	0.533242	0.854737
YKL104C	3359.93	0.236091	0.107471	2.19678	0.0280363	0.197437
YMR313C	411.707	-0.0212909	0.104422	-0.203893	0.838437	0.961157
YGL179C	171.546	0.23116	0.178687	1.29366	0.195784	0.574818
YGR120C	152.011	-0.11063	0.144441	-0.765919	0.443724	0.802936
YML001W	419.71	0.00791967	0.123665	0.0640413	0.948937	0.988883
YLL028W	881.237	0.510379	0.142889	3.57186	0.000354452	0.00640635
YER016W	184.633	-0.154939	0.155325	-0.997515	0.318514	0.706794
YHR061C	150.93	-0.115692	0.151599	-0.763146	0.445376	0.804734
YDR438W	164.439	-0.0864693	0.152205	-0.568109	0.569961	0.865711
YNL211C	47.7923	-0.300759	0.300663	-1.00032	0.317156	0.706234
YML058W-A	8.31875	-0.221135	0.585675	-0.377573	0.705748	0.92464
YLR026C	414.69	0.00804539	0.107922	0.0745482	0.940574	0.985985
YJR065C	1315.25	-0.0324883	0.109917	-0.295572	0.767557	0.946036
YDL131W	1712.31	-0.173294	0.116273	-1.49041	0.136117	0.485712
YMR095C	32.3445	1.03307	0.403962	2.55735	0.0105474	0.0989774
YER138C	6492.46	0.328138	0.184986	1.77385	0.0760877	0.35484
YDL033C	226.897	0.235209	0.185058	1.271	0.203728	0.586511
YMR255W	319.89	-0.0132367	0.115842	-0.114265	0.909028	0.975795
YHR209W	583.638	0.673035	0.165534	4.06584	4.78589e-05	0.00109914
YGL247W	106.644	-0.186528	0.221382	-0.842559	0.399475	0.77236
YCR100C	23.9207	0.128439	0.416155	0.308632	0.757601	0.943125
YDR516C	1020.47	0.272183	0.117783	2.31088	0.0208395	0.162265
Q0130	4.15661	-1.41091	0.894977	-1.57648	0.114916	0.4418
YPL233W	198.362	-0.0357104	0.142869	-0.249951	0.802625	0.951865
YOR255W	1.80947	0.839218	1.12402	0.746619	0.455294	NA
YOR063W	28121.7	-0.225114	0.155584	-1.44689	0.147926	0.50485
YGR251W	262.922	-0.204249	0.157111	-1.30003	0.19359	0.572431
YPR047W	240.269	0.274482	0.150798	1.8202	0.0687282	0.334817
YDR246W-A	5.73153	0.570703	0.704128	0.81051	0.417647	0.782047
YDR044W	297.336	-0.34481	0.186488	-1.84896	0.0644633	0.325729
YEL016C	296.756	-0.174427	0.13127	-1.32876	0.183926	0.562815
YAL027W	131.084	0.0596089	0.155803	0.382591	0.702023	0.923285
YKL153W	19.487	-0.134399	0.380973	-0.352778	0.724255	0.932485
YFL019C	7.7758	0.0183659	0.651925	0.0281718	0.977525	0.995942
YMR139W	213.235	0.0222587	0.170901	0.130243	0.896374	0.97264
YDL080C	368.288	0.098899	0.113425	0.87193	0.383246	0.762126
YOR172W	318.274	-0.115	0.164692	-0.698272	0.485007	0.826017
YOR105W	108.93	0.195473	0.203719	0.959524	0.337295	0.722339
YJL138C	6746.25	0.0269985	0.114083	0.236658	0.812922	0.955097
YPR143W	736.648	-0.240661	0.138982	-1.7316	0.0833451	0.372184
YDR340W	82.2554	-0.456239	0.432343	-1.05527	0.291301	0.685486
YNL322C	1099.82	0.0481206	0.0989229	0.486445	0.626651	0.890697
YPL090C	9358.4	-0.379795	0.159492	-2.38128	0.0172524	0.142618
YPR078C	21.9535	0.592714	0.415474	1.4266	0.153695	0.516177
YCR075C	51.5953	0.344368	0.224154	1.5363	0.124465	0.462224
YFL062W	12.7799	1.10258	0.434618	2.53689	0.0111843	0.103837
YDR171W	1486.23	0.987938	0.241024	4.09893	4.1507e-05	0.000967809
YLR439W	760.31	-0.410075	0.0973534	-4.21223	2.52867e-05	0.000620388
YCR020C	103.464	-0.034693	0.195452	-0.177502	0.859114	0.966543
YDR450W	6351.86	-0.368037	0.156299	-2.3547	0.0185379	0.148814
YCL051W	296.271	-0.0990515	0.109164	-0.907367	0.364213	0.747355
YCR097W	292.533	-0.691483	0.189604	-3.64699	0.000265329	0.0049615
YBL039C-A	7.466	-1.24679	1.82261	-0.684069	0.493931	0.833677
YDR235W	206.815	-0.181804	0.311211	-0.584182	0.559098	0.863626
YGL194C-A	42.0383	-0.279308	0.29603	-0.943512	0.345419	0.730666
YER038C	173.868	0.0405562	0.157379	0.257697	0.79664	0.950778
YPR125W	1054.21	-0.0878533	0.119368	-0.735985	0.46174	0.811265
YHR049W	2700.72	-0.0771534	0.135172	-0.570781	0.568148	0.865711
YBR007C	315.547	0.111975	0.120879	0.926339	0.35427	0.73627
YPL001W	255.224	0.0244798	0.150839	0.162291	0.871077	0.97021
YJL038C	11.8699	0.34909	0.472945	0.738121	0.460441	0.810091
YNL319W	1.96878	0.559842	1.09698	0.510348	0.609808	0.882757
YPR178W	324.086	0.181847	0.13817	1.31611	0.188137	0.567327
YDR475C	379.874	0.0465135	0.113125	0.411169	0.680949	0.914401
TLC1	517.741	-0.401667	0.186098	-2.15837	0.0308993	0.208349
YNL159C	105.438	0.0650777	0.1718	0.3788	0.704836	0.9242
YAL014C	280.151	0.239178	0.138891	1.72205	0.0850608	0.376483
YCR020W-B	86.7976	-0.308666	0.309376	-0.997705	0.318423	0.706794
YBR243C	211.631	0.0466475	0.129259	0.360885	0.718185	0.930629
YLR181C	273.645	-0.0591963	0.156044	-0.379357	0.704423	0.924119
YBL056W	964.967	-0.116365	0.0942752	-1.23431	0.217087	0.605071
YNL075W	965.263	-0.269717	0.111207	-2.42535	0.0152937	0.130488
YPL150W	434.508	0.062726	0.0975591	0.642954	0.520254	0.844825
YJL012C	821.419	-0.0879831	0.0857772	-1.02572	0.305025	0.694262
YJL065C	231.114	0.0553638	0.193477	0.286151	0.774762	0.946415
YKR020W	118.079	0.0246843	0.181803	0.135775	0.891999	0.971645
YMR053C	61.9306	0.379778	0.310125	1.2246	0.220728	0.609045
YKL066W	216.947	-0.925359	0.194088	-4.76774	1.86307e-06	5.9589e-05
YMR004W	294.273	0.246859	0.136161	1.81299	0.0698328	0.337691
YER083C	464.078	0.137659	0.134632	1.02249	0.306551	0.696828
YPL176C	622.488	0.105757	0.0991702	1.06642	0.286235	0.681899
YHR172W	85.6027	0.183843	0.217526	0.845155	0.398024	0.770954
YLR263W	683.092	-0.32043	0.150399	-2.13054	0.0331274	0.215982
YDL240W	363.351	-0.236751	0.199399	-1.18733	0.235099	0.626339
YDR401W	3.9571	1.58151	0.828498	1.90889	0.0562761	0.302367
YHR013C	392.899	-0.166108	0.138275	-1.20129	0.22964	0.622117
YOL040C	8664.54	-0.271903	0.167886	-1.61957	0.105325	0.423283
YGR072W	364.437	-0.0618442	0.108751	-0.568679	0.569574	0.865711
YCL035C	1547.95	0.399192	0.181121	2.20401	0.0275236	0.195971
YIL023C	1307.45	0.353343	0.169026	2.09046	0.0365762	0.232029
YNR073C	103.923	0.806019	0.217612	3.70392	0.000212293	0.00406552
YPR200C	37.6189	-0.142412	0.248718	-0.572582	0.566928	0.865002
YIL072W	95.1125	0.175615	0.185567	0.946373	0.343958	0.729316
YLR327C	4063.24	0.0755404	0.201671	0.374572	0.707979	0.925341
YBR229C	465.494	0.188336	0.137478	1.36994	0.170707	0.545714
YML133C	36.9241	-0.730014	0.504744	-1.44631	0.148092	0.505132
YOR131C	215.179	0.0427483	0.142326	0.300355	0.763907	0.944531
YLR455W	274.06	0.0116797	0.119723	0.0975562	0.922285	0.982735
YNL247W	1806.47	-0.124787	0.0672533	-1.85548	0.0635273	0.32384
YOR054C	272.622	0.31091	0.142218	2.18614	0.0288051	0.20052
YGL007C-A	4.46245	-0.734273	0.702155	-1.04574	0.29568	0.688522
YFR028C	513.594	-0.0200341	0.0889618	-0.225199	0.821825	0.958303
YOR009W	113.323	0.0757083	0.165097	0.458568	0.646545	0.900351
YOR072W	5.22396	-0.190082	0.719585	-0.264155	0.791661	0.94981
YDR292C	725.308	-0.127039	0.103327	-1.22948	0.218891	0.606913
YOR161C-C	2.90589	-0.290738	0.962004	-0.302222	0.762483	0.943493
YHR126C	38.5595	0.0316622	0.555868	0.0569599	0.954577	0.990743
YMR194W	2017.3	-0.266069	0.17848	-1.49075	0.136027	0.485675
YAL016C-A	1.76179	0.222022	1.17393	0.189127	0.849993	NA
YMR167W	304.292	0.0583994	0.135714	0.430312	0.666969	0.909282
YOR249C	210.227	-0.170438	0.219064	-0.778031	0.436551	0.796217
YER117W	5964.82	-0.418295	0.163344	-2.56082	0.0104425	0.0982948
YOR301W	109.2	-0.115355	0.19321	-0.597043	0.550479	0.862643
YPL187W	23.4966	0.267207	0.409745	0.65213	0.514317	0.843707
YKL218C	166.812	0.203809	0.154396	1.32004	0.18682	0.564713
YOR140W	751.358	0.0248207	0.138292	0.179481	0.85756	0.965688
YDR391C	330.195	0.304794	0.150869	2.02026	0.0433563	0.255167
YLL063C	80.9326	0.269222	0.224791	1.19766	0.23105	0.622156
YOR276W	714.957	-0.279177	0.122948	-2.2707	0.0231651	0.174938
YMR309C	3432.07	-0.058856	0.204987	-0.287121	0.77402	0.946265
YOR089C	778.323	0.0647001	0.0997901	0.648362	0.516751	0.844594
tD(GUC)N	8.01978	-1.33768	0.565789	-2.36428	0.0180652	0.147147
YGR258C	868.393	0.192638	0.10317	1.86718	0.0618762	0.319528
YNL146C-A	12.0399	0.386265	0.471977	0.818399	0.41313	0.780146
YMR180C	304.441	0.239511	0.160554	1.49178	0.135757	0.485279
YGL163C	423.969	0.48756	0.10321	4.72396	2.31294e-06	7.24603e-05
YDR417C	5.75552	0.366535	0.693376	0.528623	0.597067	0.877444
YOL131W	2.16526	0.498668	1.24697	0.399904	0.689227	0.918014
YPL283C	672.36	0.188447	0.231113	0.815389	0.41485	0.780374
YBL021C	162.39	-0.952966	0.166572	-5.72103	1.05878e-08	5.09297e-07
YHR215W	103.398	-0.061122	0.202057	-0.302499	0.762272	0.943493
YLL045C	10576.6	-0.274402	0.154224	-1.77924	0.0751997	0.352297
YLR007W	700.758	0.130795	0.15474	0.845253	0.397969	0.770954
YNL261W	308.473	0.281814	0.138268	2.03817	0.0415334	0.248722
YNL305C	371.165	0.378602	0.129986	2.91265	0.00358379	0.0427605
YJL046W	262.812	0.151805	0.145955	1.04008	0.298302	0.688522
YKR078W	207.403	-0.0554122	0.153847	-0.360177	0.718715	0.930724
YOR191W	694.459	-0.156391	0.131955	-1.18518	0.235946	0.626627
YEL074W	19.1568	-0.246335	0.335582	-0.734053	0.462917	0.811973
YDR272W	717.149	0.187906	0.107752	1.74387	0.0811813	0.36736
YGR289C	347.87	0.0641997	0.0991242	0.647669	0.517199	0.844594
YML020W	269.29	-0.0326573	0.149955	-0.217781	0.8276	0.959733
YLR103C	181.763	0.301384	0.131975	2.28364	0.0223928	0.171425
YOR294W	1042.92	-0.135411	0.157799	-0.858118	0.390827	0.76806
YEL062W	206.926	0.253897	0.138335	1.83539	0.0664484	0.330027
YPR064W	1.62072	0.638651	1.20703	0.52911	0.596729	NA
YPR031W	366.859	0.0617044	0.109489	0.563565	0.57305	0.867948
YLR038C	1575.37	-1.51153	0.100531	-15.0354	4.30424e-51	1.05178e-48
YNL096C	4092.78	-0.246825	0.132989	-1.85598	0.0634568	0.32384
YDR038C	765.103	-0.147478	0.121812	-1.2107	0.226009	0.616929
YDL187C	10.3576	-0.141804	0.591378	-0.239785	0.810497	0.953866
YBR024W	203.02	0.334524	0.146301	2.28654	0.0222228	0.170551
YER171W	579.148	-0.0172823	0.103387	-0.16716	0.867244	0.968898
YDL047W	1041.36	-0.131902	0.107575	-1.22614	0.220146	0.608816
YML046W	335.865	-0.265842	0.242485	-1.09633	0.272937	0.669357
YGL124C	326.53	0.0741583	0.135511	0.547251	0.584206	0.86925
YMR276W	1338.43	0.376242	0.104244	3.60923	0.00030711	0.00563403
YEL059W	6.25059	0.291601	0.616796	0.472768	0.636379	0.895828
YDL160C-A	53.1792	-0.126241	0.21957	-0.574947	0.565327	0.864854
YLR165C	123.729	0.0846616	0.165001	0.513097	0.607883	0.882415
YCR069W	619.427	0.120073	0.115109	1.04313	0.296888	0.688522
YGR146C-A	1.22878	-0.830399	1.30595	-0.63586	0.524868	NA
YKL027W	754.547	0.0748082	0.175652	0.425888	0.670189	0.911399
YJL173C	174.34	0.139683	0.173509	0.805047	0.420792	0.784292
YDR152W	992.111	-0.0991695	0.102237	-0.969998	0.332047	0.718349
YKL127W	173.561	-0.199847	0.167753	-1.19131	0.233531	0.624897
YDR309C	1032.36	0.103638	0.148707	0.696926	0.485849	0.826017
YLR386W	275.95	-0.12943	0.163135	-0.793395	0.427548	0.790481
YLR371W	729.765	-0.110833	0.149809	-0.739828	0.459404	0.810083
YDL169C	107.308	0.476994	0.194724	2.4496	0.0143016	0.124103
YLR092W	97.3514	-0.105124	0.188476	-0.557758	0.577009	0.868229
YER044C	1099.07	0.106342	0.103576	1.02671	0.304556	0.693712
YMR072W	701.85	0.0910203	0.138585	0.656784	0.51132	0.843316
YJR033C	328.809	0.127405	0.123708	1.02988	0.303067	0.693194
YKR056W	1646.81	-0.142867	0.0939998	-1.51987	0.128544	0.471791
YGL011C	1208.5	0.311405	0.0899107	3.46349	0.00053321	0.00904827
YIR036C	397.734	0.413761	0.174462	2.37164	0.0177094	0.145023
YMR123W	294.569	-0.0983203	0.165715	-0.593309	0.552974	0.862643
YDR406W	966.859	0.697128	0.192994	3.61217	0.000303645	0.00558726
YGR073C	30.8615	-0.452207	0.285192	-1.58562	0.112825	0.438732
YGR209C	1110.33	0.362106	0.164899	2.19592	0.0280975	0.197523
tS(UGA)E	2.03471	0.112948	1.18487	0.0953257	0.924056	0.982735
YNL050C	529.758	-0.193722	0.108852	-1.77968	0.075128	0.352231
YMR304C-A	211.674	-0.123287	0.222474	-0.554163	0.579468	0.86839
YLR240W	268.228	0.0141151	0.154683	0.0912521	0.927292	0.983139
YGR093W	605.351	-0.147838	0.121254	-1.21924	0.222754	0.612422
YDL234C	606.609	0.312945	0.107207	2.91908	0.00351072	0.0422249
YNL136W	440.327	-0.156993	0.158574	-0.990028	0.32216	0.709217
YKL049C	187.747	0.117079	0.154274	0.758901	0.447912	0.805977
YJR080C	627.634	-0.639646	0.0996326	-6.42005	1.36226e-10	8.07963e-09
YNR038W	726.465	-0.0299069	0.100854	-0.296536	0.766821	0.945983
YGL140C	645.932	-0.0752865	0.133215	-0.565152	0.57197	0.867641
YCL029C	338.562	-0.247217	0.127545	-1.93827	0.0525899	0.291535
YFL038C	2034.38	0.0226028	0.130247	0.173538	0.862229	0.967197
YJR131W	323.705	-0.00482738	0.105645	-0.0456942	0.963554	0.991489
YNR012W	560.075	-0.0383868	0.0885498	-0.433506	0.664647	0.907611
YNL110C	1674.07	-0.117133	0.120675	-0.970651	0.331722	0.718349
YDR367W	209.872	-0.19085	0.228995	-0.833424	0.404606	0.774663
YIL053W	13515.3	0.143225	0.240321	0.595976	0.551191	0.862643
YPL059W	448.817	0.117416	0.120518	0.974262	0.329927	0.717305
YGL253W	13040.6	-0.263288	0.117773	-2.23556	0.0253804	0.187484
YHL032C	1675.87	-0.343454	0.0880974	-3.89857	9.67619e-05	0.00201747
YJL010C	786.252	-0.0377284	0.104842	-0.359858	0.718953	0.930724
YHL045W	2.10103	0.86567	1.18935	0.727854	0.466703	0.813435
YOR337W	1473.9	-0.301019	0.0790675	-3.80711	0.0001406	0.00281673
YMR010W	754.116	0.224767	0.191951	1.17096	0.241614	0.633675
YOR097C	109.491	0.07615	0.155202	0.490651	0.623673	0.889984
YHR118C	207.776	-0.0543617	0.12856	-0.422851	0.672404	0.912015
YGR024C	379.795	0.0291129	0.154929	0.187911	0.850946	0.963625
YOL023W	413.621	0.176256	0.135483	1.30095	0.193277	0.571782
YPL253C	117.466	0.125135	0.193581	0.64642	0.518007	0.844594
YER154W	909.022	0.0366771	0.130603	0.280828	0.778842	0.946722
YEL036C	2158.73	-0.140226	0.116711	-1.20148	0.229565	0.622117
YBR260C	360.696	0.135992	0.113336	1.1999	0.23018	0.622156
YPL124W	50.4993	-0.320174	0.248876	-1.28648	0.198274	0.578719
YAL042W	1172.39	-0.103626	0.149194	-0.69457	0.487325	0.827653
YAL035W	3312.56	-0.102314	0.0740549	-1.38159	0.167096	0.54096
YNL286W	218.055	-0.0968198	0.153544	-0.630565	0.528325	0.851018
YDR001C	2570.42	0.197114	0.091801	2.14718	0.0317786	0.21217
YIL162W	16103	0.0146137	0.115206	0.126849	0.89906	0.974064
YOL141W	155.567	-0.267189	0.147563	-1.81068	0.070191	0.337901
YHR145C	26.7362	-0.643341	0.568178	-1.13229	0.257513	0.65234
YBR195C	225.468	-0.0281754	0.130914	-0.215221	0.829595	0.960029
YIL039W	813.716	-0.156903	0.0845794	-1.8551	0.0635818	0.32384
YGR122W	110.148	-0.0804317	0.176693	-0.455205	0.648962	0.900411
YPL092W	243.837	-0.0999179	0.116211	-0.859797	0.389901	0.767818
YGR161C-D	674.387	-0.111911	0.396858	-0.281993	0.777949	0.946722
YMR315W	1075.6	0.369257	0.126767	2.91288	0.00358115	0.0427605
YGR213C	8.1604	1.97247	0.575136	3.42957	0.000604537	0.0100356
YDR384C	1292.47	0.211567	0.120511	1.75558	0.0791607	0.36143
YML007W	1950.61	0.14267	0.0887297	1.60792	0.107854	0.428505
YER063W	451.539	0.0280736	0.129932	0.216063	0.828939	0.959733
YDR481C	788.267	0.279685	0.113513	2.46391	0.0137431	0.120627
YER014W	320.036	0.274483	0.122415	2.24223	0.0249467	0.184503
YPR041W	2637.11	-0.0807522	0.0892557	-0.904728	0.365609	0.747355
YNL213C	394.103	-0.0473209	0.114581	-0.412992	0.679613	0.913767
YKL006C-A	306.983	-0.202994	0.13595	-1.49315	0.135397	0.484893
YBR058C	779.721	-0.0256103	0.0890808	-0.287495	0.773734	0.946265
YLR024C	268.239	0.219627	0.177997	1.23388	0.217248	0.605071
YLR071C	643.835	-0.0509428	0.189258	-0.269171	0.787798	0.948944
YHR092C	2475.73	-1.03148	0.260723	-3.95623	7.61421e-05	0.00161511
YDL199C	93.005	0.406533	0.242682	1.67517	0.0939013	0.395071
YHL007C	1939.08	-0.0115234	0.0759398	-0.151744	0.879389	0.971334
YNL228W	2.96385	-0.109008	0.988329	-0.110296	0.912175	0.977414
YDL064W	284.678	-0.182523	0.132652	-1.37596	0.168834	0.543335
YDL031W	1625.03	-0.103198	0.10146	-1.01713	0.309092	0.699651
YMR257C	343.678	-0.0934683	0.261014	-0.358097	0.720271	0.931048
YDR046C	2147.69	0.0837503	0.159652	0.524581	0.599874	0.878171
YOR253W	273.416	-0.130969	0.151992	-0.861685	0.388861	0.767793
YGL245W	2524.8	-0.112853	0.108361	-1.04145	0.297665	0.688522
YGR006W	86.0749	-0.116826	0.204744	-0.570595	0.568274	0.865711
YGR079W	3004.29	0.083624	0.108513	0.770638	0.440921	0.800002
YDL119C	175.542	0.38838	0.137708	2.82031	0.00479775	0.0538776
YKL151C	1004.21	0.654544	0.164722	3.97364	7.07828e-05	0.00152258
YGL198W	287.531	0.00032735	0.13887	0.00235724	0.998119	0.999766
YDL086W	1357.43	0.127723	0.170531	0.748969	0.453876	0.809443
YBL091C-A	111.625	0.15136	0.181216	0.835247	0.403579	0.774519
YLR361C-A	129.665	0.212891	0.145854	1.45962	0.144394	0.497327
YHR038W	209.573	0.113572	0.152814	0.743207	0.457356	0.809499
YML069W	774.861	-0.0333543	0.103517	-0.32221	0.747294	0.939732
YKR019C	175.275	-0.0888398	0.149755	-0.593235	0.553024	0.862643
YJR073C	663.501	0.285075	0.125504	2.27145	0.0231197	0.174938
YGR279C	3288.94	-0.20695	0.0926003	-2.23487	0.0254256	0.187577
YCR073C	602.174	0.337725	0.136516	2.47388	0.0133655	0.118009
YCR022C	1.40327	-0.948034	1.3648	-0.694633	0.487285	NA
YLL015W	809.944	0.136387	0.124664	1.09404	0.273939	0.670471
YNL195C	107.896	0.764874	0.217265	3.52047	0.000430787	0.00754062
YDL134C	1043.52	-0.0769195	0.0732965	-1.04943	0.293981	0.688253
YFL060C	139.694	-0.943576	0.145503	-6.4849	8.87892e-11	5.37043e-09
YDR173C	117.388	-0.362369	0.177843	-2.03759	0.0415914	0.248722
YMR100W	487.036	-0.0532728	0.14002	-0.380465	0.703601	0.923769
YCL057W	1102.3	-0.0544878	0.117478	-0.463812	0.642782	0.899432
YBR072W	26169.1	0.89204	0.152522	5.84861	4.95709e-09	2.46202e-07
YBR005W	285.64	0.139906	0.154803	0.903766	0.366119	0.747534
YPR123C	7.31366	0.152873	0.61319	0.249308	0.803123	0.951865
RUF5-2	292.597	0.242909	0.259038	0.937735	0.34838	0.731904
YDL173W	519.329	-0.0177127	0.127983	-0.138398	0.889925	0.971645
YJR047C	17.8037	0.0328598	0.524501	0.0626496	0.950046	0.989076
YMR006C	876.156	0.150362	0.225547	0.666656	0.504992	0.840349
YKL145W-A	19.1596	0.296815	0.461906	0.642589	0.520491	0.844985
YAL016W	1115.12	-0.000831785	0.116305	-0.00715173	0.994294	0.998708
YMR292W	140.448	-0.497528	0.257896	-1.92918	0.0537089	0.295318
YHR011W	198.374	-0.0432321	0.154869	-0.279153	0.780127	0.946722
YPL152W	131.559	0.0620647	0.177937	0.348801	0.727238	0.93392
YLR183C	112.815	0.502719	0.160621	3.12984	0.00174901	0.0248482
YNL077W	259.884	-0.0255155	0.139186	-0.18332	0.854547	0.964478
YBR109C	963.531	0.0956359	0.124714	0.766844	0.443174	0.802731
YBR172C	2180.14	-0.292944	0.0799614	-3.66357	0.000248721	0.00474468
YDR346C	1888.87	-0.0817197	0.13409	-0.609441	0.542232	0.859211
YAR002C-A	867.255	-0.14357	0.110859	-1.29506	0.195298	0.574743
YOL077W-A	985.893	-1.23009	0.0890018	-13.8209	1.90601e-43	3.63868e-41
YPL029W	405.846	0.018111	0.0958002	0.18905	0.850054	0.963393
YHR146W	892.683	0.0337514	0.197967	0.17049	0.864625	0.968898
YDL242W	3.84161	0.144413	0.776951	0.185871	0.852546	0.964478
YBR189W	10647.7	-0.355044	0.153334	-2.31549	0.0205861	0.161246
YER085C	15.0485	-0.192555	0.379253	-0.507722	0.611648	0.882796
YJL225C	1068.22	0.0696661	0.10479	0.664814	0.50617	0.840349
YKL064W	759.199	0.0968891	0.0938959	1.03188	0.302129	0.693093
YLR265C	149.615	-0.193125	0.234484	-0.823617	0.410157	0.778152
YKR022C	306.726	-0.255948	0.132471	-1.93211	0.0533464	0.294127
YLR287C	424.721	-0.0260737	0.146846	-0.177558	0.85907	0.966543
YPL174C	248.58	-0.0740272	0.196577	-0.376581	0.706485	0.92464
YOR070C	387.204	-0.105894	0.100944	-1.04904	0.294161	0.688253
YDR403W	112.739	0.215055	0.161522	1.33143	0.183048	0.562083
YOL093W	400.812	-0.210691	0.144276	-1.46034	0.144198	0.497327
YOL042W	287.881	-0.16518	0.148725	-1.11064	0.266724	0.660749
YIL070C	846.748	0.140007	0.0911205	1.53651	0.124414	0.462224
YCL037C	39.2372	-0.327761	0.26552	-1.23441	0.217049	0.605071
YIL025C	3.85332	0.351875	0.772836	0.455303	0.648891	0.900411
YDR545C-A	11.1885	-0.065117	1.43318	-0.0454352	0.96376	0.991489
YNR071C	26.2501	-0.238369	0.33943	-0.702263	0.482515	0.824067
YML131W	659.634	0.36104	0.109621	3.29352	0.000989401	0.0155213
YNL245C	275.052	-0.0847946	0.158717	-0.53425	0.593169	0.87535
YNR024W	323.897	-0.078354	0.15613	-0.501851	0.615773	0.885119
YFL013W-A	2.79511	0.306284	1.14629	0.267196	0.789318	0.948982
YLR329W	21.1477	0.17286	0.369996	0.467194	0.640361	0.898064
YPL043W	2105.02	-0.114179	0.135838	-0.840551	0.4006	0.772495
YCL045C	1316.53	-0.0428208	0.107447	-0.398529	0.690241	0.91846
YKL002W	602.172	-0.116901	0.120581	-0.969481	0.332305	0.718349
YDR328C	785.654	-0.0358775	0.140478	-0.255395	0.798418	0.9511
YIR009W	71.4202	0.112348	0.227049	0.494817	0.620729	0.888538
YBR154C	1305.38	-0.124732	0.121315	-1.02816	0.303874	0.693712
YLR001C	390.401	0.161619	0.141212	1.14451	0.252411	0.646069
YKR101W	216.949	0.0867462	0.142581	0.608401	0.542922	0.85949
YMR230W-A	6.42472	-1.19391	0.640883	-1.86292	0.0624739	0.321798
YER115C	197.481	-0.27071	0.132461	-2.04369	0.040984	0.246942
YHR124W	57.2043	-0.313107	0.233711	-1.33972	0.180337	0.559919
YER148W	836.83	-0.213157	0.109277	-1.95061	0.0511029	0.285886
YMR240C	269.868	-0.302315	0.130834	-2.31067	0.0208509	0.162265
YOR303W	11165.6	0.228125	0.143735	1.58713	0.112483	0.437681
YIL087C	222.68	0.531917	0.245253	2.16885	0.0300943	0.20565
YMR192W	549.639	0.131911	0.154992	0.851082	0.394724	0.769137
YJL221C	178.956	0.22656	0.153528	1.47569	0.140028	0.490714
YMR229C	2895.66	-0.263459	0.160034	-1.64627	0.0997076	0.408361
YLL038C	249.279	-0.0336288	0.132973	-0.252901	0.800345	0.951519
YOR056C	1615.26	-0.184754	0.122382	-1.50966	0.131131	0.4757
YOL108C	85.0137	0.173377	0.208388	0.831991	0.405414	0.775019
YOR270C	3137.75	0.0129625	0.0741779	0.174749	0.861277	0.967195
YDR106W	9.45518	0.170534	0.496828	0.343247	0.731413	0.934966
YOL068C	928.152	0.112557	0.0770401	1.46102	0.14401	0.497327
YMR182C	692.704	0.290998	0.139581	2.0848	0.0370878	0.233413
YBR201W	164.818	-0.00391983	0.17716	-0.0221259	0.982348	0.997024
YLL043W	1206.05	-0.0475009	0.0947195	-0.501491	0.616026	0.885275
YDR415C	254.685	-0.179698	0.133885	-1.34218	0.179538	0.559592
YGL161C	352.734	-0.157887	0.126513	-1.248	0.212032	0.600512
YOL133W	149.424	0.296936	0.15907	1.8667	0.0619442	0.319609
YDL074C	842.853	-0.117149	0.150555	-0.778111	0.436504	0.796217
YNL263C	379.185	0.0285764	0.107356	0.266183	0.790098	0.948982
YHR217C	2.32804	0.0696293	0.929998	0.0748704	0.940318	0.985985
YDR128W	534.63	0.0914706	0.123328	0.741688	0.458276	0.810083
YOR193W	101.626	0.27291	0.269174	1.01388	0.31064	0.699999
YER028C	63.1576	0.0293573	0.255052	0.115103	0.908364	0.975795
YMR052W	75.6617	0.209329	0.190906	1.0965	0.272859	0.669357
YMR294W-A	1.73433	-0.44898	1.11067	-0.404241	0.686035	NA
YKR076W	491.397	0.471456	0.166171	2.83717	0.00455149	0.0517785
YDR225W	2920.71	0.0718251	0.16427	0.437238	0.661938	0.907594
YDR270W	308.409	0.174347	0.169373	1.02937	0.303308	0.693194
YPR033C	2329.15	-0.104096	0.0950475	-1.0952	0.273429	0.669783
YGR230W	127.371	0.103757	0.188876	0.549338	0.582773	0.868576
YPR062W	732.872	-0.259295	0.182379	-1.42173	0.155103	0.518818
YDR528W	268.256	0.350716	0.258918	1.35455	0.175562	0.553624
YER173W	299.132	-0.0967199	0.137866	-0.701548	0.482961	0.82439
YBR026C	1011.8	0.347388	0.104838	3.31357	0.00092112	0.014654
YDL185W	4507.12	0.063947	0.0989981	0.645942	0.518317	0.844594
YBR091C	114.214	-0.0104923	0.166291	-0.0630958	0.94969	0.989031
YNL094W	613.437	0.00016648	0.0843596	0.00197346	0.998425	0.999766
YGL056C	2735.04	-0.0969201	0.110402	-0.877882	0.380008	0.759194
YPL227C	314.339	-0.156718	0.115709	-1.35442	0.175603	0.553624
YLR222C-A	33.061	-0.0101138	0.49896	-0.0202698	0.983828	0.997024
YDL010W	184.224	0.0656598	0.134062	0.489771	0.624296	0.890077
YML019W	254.549	-0.292915	0.143928	-2.03515	0.0418361	0.249343
YDL045C	358.441	-0.0656992	0.101467	-0.647493	0.517313	0.844594
YLR163C	658.215	0.0968656	0.0907336	1.06758	0.285709	0.681263
YLR178C	1035.57	1.14607	0.173762	6.59559	4.23561e-11	2.61367e-09
YBL079W	900.788	-0.145611	0.179024	-0.813363	0.41601	0.780688
YNL056W	293.334	0.324737	0.152175	2.13397	0.0328454	0.214716
YFL001W	531.441	0.392779	0.137071	2.86551	0.00416342	0.0479893
YDR150W	1005.02	-0.389189	0.14392	-2.70421	0.00684674	0.0706411
YER147C-A	5.83757	0.147781	0.6653	0.222127	0.824215	0.959197
YKL170W	344.372	0.0300619	0.143103	0.210073	0.833611	0.961036
YPR157W	96	-0.44282	0.196767	-2.25047	0.0244189	0.181519
YPR137C-B	546.043	0.991479	1.50257	0.659856	0.509346	0.841496
YLR384C	1657.9	-0.160125	0.123206	-1.29966	0.193718	0.572533
YPL060W	166.635	-0.0918522	0.139696	-0.657516	0.510849	0.842998
YML099C	539.381	-0.0963637	0.113836	-0.846513	0.397266	0.770444
YLR421C	431.755	0.226326	0.120366	1.88031	0.0600657	0.314233
YLR090W	541.922	0.0995806	0.096973	1.02689	0.304472	0.693712
YJR064W	1679.87	-0.076534	0.0916915	-0.83469	0.403892	0.774519
YML022W	1224.73	-0.188214	0.140658	-1.3381	0.180865	0.560298
YER046W	118.678	-0.0925429	0.169289	-0.546656	0.584615	0.869592
YMR029C	249.183	-0.120829	0.1491	-0.810392	0.417715	0.782047
YIR030C	20.1209	-0.493896	0.376872	-1.31051	0.190022	0.569189
YKR050W	365.24	0.118437	0.114325	1.03597	0.300217	0.689629
YMR121C	311.526	0.2609	0.128267	2.03404	0.0419477	0.249765
YGL017W	269.534	0.0420959	0.119064	0.353558	0.72367	0.932485
YDL150W	932.02	-0.135323	0.117453	-1.15214	0.249263	0.643051
YNL038W	197.632	-0.254391	0.207705	-1.22477	0.220661	0.609045
YHR001W-A	890.055	-1.7214	0.14697	-11.7126	1.09859e-31	1.42793e-29
YOL165C	2.00266	1.61213	1.19937	1.34415	0.1789	0.55941
YIL139C	145.961	-0.19796	0.189619	-1.04399	0.296492	0.688522
YLR246W	280.342	0.111984	0.118935	0.941557	0.346419	0.731264
YJR119C	543.391	-0.00820423	0.155079	-0.0529035	0.957809	0.991489
YLR359W	1806.9	0.106065	0.144501	0.734008	0.462944	0.811973
YLR199C	530.625	0.123628	0.103217	1.19776	0.231011	0.622156
YJL206C	200.831	-0.0156029	0.180117	-0.0866261	0.930969	0.983987
YIL142W	1838.15	0.0365431	0.101071	0.36156	0.717681	0.930289
YGL082W	282.208	-0.0149726	0.120199	-0.124565	0.900868	0.974398
YNL138W	808.403	-0.00498759	0.103313	-0.0482765	0.961496	0.991489
YOR133W	2990.08	-0.189951	0.164576	-1.15418	0.248426	0.642268
21S_rRNA	71.2116	-0.672574	0.29949	-2.24573	0.0247214	0.183281
YGL142C	290.224	-0.00956091	0.124334	-0.0768969	0.938706	0.985985
YGR179C	155.939	-0.16105	0.157582	-1.02201	0.306777	0.696828
YGR102C	284.288	0.0654443	0.139829	0.46803	0.639763	0.89793
YBR139W	383.742	0.45883	0.166523	2.75535	0.00586292	0.0631843
YHR188C	713.221	-0.108524	0.0848262	-1.27937	0.200766	0.582928
YKL106C-A	1.64767	-1.36743	1.27707	-1.07076	0.284278	NA
YNL116W	336.064	0.171615	0.109791	1.5631	0.118028	0.44757
YNL139C	417.905	-0.0970614	0.187037	-0.518941	0.603802	0.880078
YDR361C	676.146	-0.166378	0.126822	-1.3119	0.189553	0.568194
YGL255W	2311.69	-0.281901	0.134319	-2.09874	0.0358396	0.229501
YFR007W	187.831	0.0913137	0.127613	0.715553	0.474268	0.819604
YLR333C	2821.41	-0.272052	0.141922	-1.91691	0.0552492	0.299382
YHR103W	619.848	-0.248901	0.119416	-2.08431	0.0371319	0.233413
YHL030W	476.709	0.548567	0.169502	3.23635	0.00121069	0.0180392
YGL077C	522.306	-0.215479	0.145704	-1.47888	0.139173	0.489294
YPL204W	2268.62	-0.0332061	0.0838486	-0.396025	0.692087	0.919095
YIL009C-A	89.0772	-0.0211882	0.231008	-0.0917206	0.92692	0.983139
YOR091W	1169.31	-0.0364202	0.144606	-0.251858	0.80115	0.951519
YGR026W	354.199	0.256378	0.189488	1.35301	0.176054	0.554162
YAL040C	3712.44	0.132834	0.108738	1.22159	0.221863	0.611012
YDR288W	201.301	-0.244381	0.142111	-1.71965	0.0854968	0.377455
YGL208W	287.99	0.491653	0.134848	3.64598	0.000266374	0.0049615
YNL284C	560.333	-0.0131193	0.0898209	-0.146061	0.883873	0.971334
YIL164C	90.7522	0.0504651	0.238366	0.211712	0.832332	0.960774
YOL143C	1604.19	-0.0780902	0.124142	-0.629037	0.529325	0.851632
YBR237W	641.616	-0.0603032	0.108724	-0.554643	0.579139	0.86839
YBR197C	165.951	0.0768155	0.185979	0.413033	0.679583	0.913767
YHR147C	500.79	0.0653636	0.109918	0.594656	0.552073	0.862643
YJL093C	444.45	0.102648	0.123799	0.829148	0.40702	0.775814
YPL126W	2698.8	-0.0452293	0.131209	-0.344711	0.730312	0.933949
YMR317W	9.8538	0.751166	0.51991	1.4448	0.148514	0.505401
YOR251C	480.811	-4.44457e-05	0.123898	-0.000358727	0.999714	0.999912
YPR181C	1867.92	-0.00280224	0.0952562	-0.0294179	0.976531	0.995848
YCL008C	237.674	-0.0143959	0.142726	-0.100864	0.919658	0.981977
YOR107W	577.725	0.214081	0.193141	1.10842	0.26768	0.66148
YML005W	292.59	0.00233238	0.112852	0.0206675	0.983511	0.997024
YNL215W	348.246	-0.107215	0.122445	-0.875615	0.381239	0.760597
YCR075W-A	65.0731	0.0673737	0.221223	0.304552	0.760708	0.943125
YDL059C	66.4479	0.302515	0.192904	1.56822	0.116831	0.446144
YOR204W	1870.11	0.136303	0.132749	1.02678	0.304525	0.693712
YEL012W	445.435	0.107935	0.126997	0.849901	0.39538	0.769137
YBL040C	289.037	-0.0280963	0.222482	-0.126286	0.899506	0.974064
YPR043W	4860.74	-0.299296	0.170639	-1.75398	0.0794344	0.362408
YDR382W	5359.14	-0.309516	0.162862	-1.90048	0.0573699	0.306285
YDR483W	2387.3	-0.077537	0.105698	-0.733569	0.463211	0.811973
YER061C	251.716	0.263649	0.167455	1.57444	0.115385	0.442489
YLR022C	300.126	-0.0460523	0.17628	-0.261244	0.793904	0.9506
YLR402W	59.4226	0.0814482	0.25371	0.321029	0.748189	0.940564
YLR073C	473.567	-0.0956215	0.156257	-0.611951	0.54057	0.858867
YER183C	183.858	-0.143133	0.172784	-0.828393	0.407448	0.775814
YHR090C	338.914	-0.0242426	0.135075	-0.179476	0.857564	0.965688
YOL021C	1434.36	-0.0457041	0.117834	-0.387868	0.698114	0.921724
YHR030C	1956.05	-0.026087	0.133107	-0.195985	0.844622	0.962099
YBR295W	530.618	0.229423	0.107847	2.1273	0.0333952	0.217264
YKL018W	284.537	-0.115248	0.123142	-0.935894	0.349328	0.731904
YIL011W	42.6398	0.8633	0.239455	3.60527	0.000311829	0.00570349
YEL034W	13299.6	-0.262744	0.135327	-1.94155	0.0521912	0.290115
YHL015W	7143.56	-0.305297	0.142795	-2.138	0.0325165	0.214095
YNR050C	401.92	-0.211687	0.218065	-0.97075	0.331673	0.718349
YDR134C	1273.38	0.41043	0.106027	3.87098	0.000108396	0.0022147
YKL208W	142.288	0.0313172	0.137567	0.22765	0.819918	0.958242
YGR004W	149.043	-0.0772193	0.165018	-0.467944	0.639825	0.89793
YML110C	1054.21	0.386457	0.131918	2.92952	0.00339483	0.0413128
YGL048C	1338.09	0.313351	0.0878082	3.56859	0.000358912	0.00646322
YGL243W	262.249	-0.137567	0.115904	-1.18691	0.235264	0.626339
YKL106W	399.488	-0.0900954	0.100258	-0.898638	0.368846	0.750432
tN(GUU)N1	14.1522	-0.113926	0.530699	-0.214671	0.830024	0.960344
YPR029C	706.477	-0.0198719	0.172365	-0.11529	0.908215	0.975795
YJL034W	4435	0.342012	0.138052	2.47742	0.0132338	0.117337
YFL048C	743.162	-0.117569	0.0884605	-1.32906	0.183828	0.562815
YLR117C	588.23	-0.031023	0.108036	-0.287153	0.773995	0.946265
YOR176W	363.701	0.20141	0.130398	1.54458	0.122448	0.458008
YOR109W	655.02	0.00732273	0.155006	0.0472417	0.962321	0.991489
YBL089W	181.571	0.0775927	0.150487	0.515609	0.606127	0.881626
YDL084W	2147.66	-0.119602	0.0880647	-1.35812	0.174427	0.55211
YGL116W	328.363	0.0830079	0.109872	0.755497	0.449951	0.807031
YNR034W-A	2766.51	0.211763	0.142474	1.48633	0.137192	0.486938
YCR024C	199.394	0.413971	0.185482	2.23187	0.0256233	0.18814
YIL102C-A	65.9186	0.0313173	0.210608	0.1487	0.881791	0.971334
YMR102C	603.27	0.181629	0.0901969	2.0137	0.0440412	0.257462
YCR071C	307.342	-0.000100548	0.156958	-0.000640606	0.999489	0.999912
YDR175C	516.433	0.057903	0.0924855	0.626077	0.531265	0.85309
YOR189W	198.622	-0.164015	0.162034	-1.01223	0.311428	0.700377
YOR154W	453.282	-0.217095	0.157052	-1.38231	0.166876	0.540883
YPR121W	317.907	0.0940872	0.112814	0.834001	0.404281	0.774519
YBR070C	104.036	0.255087	0.22692	1.12413	0.260958	0.656569
YLL017W	6.4246	0.234845	0.699001	0.335972	0.736892	0.938237
YDR351W	934.245	-0.0332981	0.126138	-0.263981	0.791795	0.94981
YNL315C	626.614	0.0158792	0.113769	0.139574	0.888996	0.971564
YPR174C	141.482	-0.0174968	0.182642	-0.095798	0.923681	0.982735
YJR045C	9680.33	0.370795	0.124496	2.97836	0.00289799	0.0367299
YMR008C	1207.85	0.130626	0.126884	1.02949	0.303248	0.693194
YDR349C	1101.97	0.0993966	0.0808741	1.22903	0.219061	0.606913
YDL171C	1960.79	-0.0512321	0.112161	-0.456775	0.647833	0.900351
YKL062W	1133.9	0.496017	0.0979583	5.06355	4.11511e-07	1.53288e-05
YJR010W	204.241	0.0823454	0.161718	0.50919	0.610619	0.882796
YJL218W	25.902	-0.33367	0.332711	-1.00288	0.315917	0.704711
YIL126W	1047.37	-0.0828701	0.105762	-0.78355	0.433304	0.793958
YDR093W	575.878	-0.19138	0.128531	-1.48898	0.136493	0.4862
YMR282C	426.766	-0.751017	0.125163	-6.00032	1.96932e-09	1.02825e-07
YIL109C	1663.92	0.126869	0.101254	1.25298	0.210213	0.597575
YFL022C	2666.36	-0.111282	0.114141	-0.974948	0.329586	0.717305
YPL109C	218.141	-0.220917	0.169583	-1.30271	0.192673	0.571378
YJL156C	518.051	-0.0069158	0.131499	-0.0525922	0.958057	0.991489
YNL071W	2016.16	0.0155857	0.12046	0.129385	0.897053	0.972838
YMR088C	484.371	-0.448709	0.1237	-3.62739	0.000286302	0.00530005
YGR211W	1592	-0.0436374	0.123164	-0.354303	0.723112	0.932358
YKL139W	478.934	0.0374131	0.142299	0.262919	0.792613	0.949985
YJL069C	1139.28	-0.0336391	0.0934433	-0.359995	0.718851	0.930724
YDR323C	130.129	-0.448733	0.167003	-2.68697	0.00721037	0.0737825
YDR344C	5.17877	0.525439	0.671047	0.783014	0.433619	0.794297
YJL016W	478.642	0.471138	0.131844	3.57345	0.000352312	0.00638657
YDR444W	454.382	-0.215908	0.0914211	-2.36168	0.0181922	0.147621
YPL189W	59.0579	0.210689	0.235301	0.8954	0.370573	0.750608
YLR285W	372.125	-0.143587	0.134486	-1.06767	0.285668	0.681263
YLR267W	149.584	0.664778	0.221965	2.99496	0.00274477	0.0351526
YDL219W	127.037	-0.262096	0.181412	-1.44476	0.148525	0.505401
YNL017C	3.07914	0.0492961	0.8527	0.0578118	0.953899	0.990651
YCR024C-A	1142.11	-0.119844	0.231326	-0.518073	0.604407	0.880078
YCR024C-B	1661.62	-0.0485748	0.577312	-0.0841396	0.932945	0.984176
YKR024C	1216.89	0.00207767	0.125366	0.0165729	0.986777	0.997596
YBR156C	178.686	0.205757	0.131787	1.56128	0.118457	0.44836
YOR076C	247.275	-0.030683	0.205597	-0.149238	0.881365	0.971334
YEL059C-A	113.174	0.24489	0.194867	1.2567	0.208862	0.59512
YDR405W	651.97	0.229023	0.152045	1.50628	0.131994	0.477981
YOL091W	73.6462	-0.511788	0.309795	-1.65202	0.0985295	0.405878
YCL031C	894.792	-0.159392	0.143296	-1.11233	0.265997	0.660749
YIL027C	183.019	-0.138756	0.251097	-0.5526	0.580537	0.86839
YLR459W	240.151	-0.0206694	0.259149	-0.0797585	0.936429	0.985463
YNL243W	1314.96	-0.410569	0.115982	-3.53995	0.000400208	0.00704574
YNR026C	604.688	0.0499895	0.102594	0.487254	0.626078	0.890089
YHL044W	40.7811	0.897713	0.290081	3.0947	0.00197011	0.0270459
YPR204W	2744.89	-0.0625864	0.102458	-0.610847	0.541301	0.859134
YNL297C	414.011	-0.109357	0.24685	-0.44301	0.657758	0.904531
YBR170C	382.438	0.475569	0.116155	4.09425	4.23542e-05	0.000983809
YGR149W	230.71	0.37153	0.24706	1.50381	0.132631	0.479151
YDR458C	649.877	-0.196657	0.148652	-1.32293	0.185858	0.564597
YKL193C	312.154	0.222795	0.159064	1.40066	0.161315	0.530129
YPR099C	5.14887	-0.405589	0.738798	-0.548985	0.583016	0.868576
YLR310C	1134.44	-0.122319	0.189622	-0.64507	0.518882	0.844594
YNR008W	319.359	0.0121071	0.114034	0.106171	0.915447	0.97993
YJR150C	1.09445	2.66309	1.67055	1.59414	0.110904	NA
YBR301W	1.76546	-0.237303	1.21407	-0.195461	0.845032	NA
YLR003C	645.645	-0.0889369	0.156414	-0.5686	0.569627	0.865711
YER113C	436.675	-0.259118	0.143329	-1.80785	0.0706298	0.339212
YHR122W	422.765	-0.0698243	0.139655	-0.499979	0.61709	0.88597
YHL017W	358.809	-0.0270894	0.117825	-0.229912	0.81816	0.957671
YJR010C-A	78.3102	-0.134415	0.193759	-0.693723	0.487856	0.827918
YIL085C	649.66	-0.0296575	0.0918243	-0.322981	0.746709	0.939732
YMR190C	329.451	0.149732	0.134633	1.11215	0.266072	0.660749
YLR325C	4687.17	-0.294976	0.156616	-1.88344	0.0596412	0.313462
YOR272W	1268.47	-0.0971666	0.104218	-0.93234	0.351161	0.733166
YOR058C	270.22	0.100725	0.169304	0.594934	0.551887	0.862643
YAL064W-B	16.2383	0.225447	0.421179	0.535277	0.592458	0.874867
YDR413C	4.42035	-0.220664	0.738613	-0.298754	0.765128	0.944848
YBR203W	1034.15	0.330323	0.169181	1.95248	0.0508809	0.285167
YAR029W	4.7609	0.128252	0.922091	0.139089	0.88938	0.971618
YNL238W	945.509	-0.0453142	0.0893242	-0.5073	0.611944	0.882796
YJL198W	1355.4	0.124805	0.104082	1.1991	0.23049	0.622156
YOL135C	153.88	-0.0586498	0.167182	-0.350814	0.725728	0.93297
YOR323C	1116.11	-0.189826	0.132752	-1.42993	0.152737	0.513806
YLL041C	2972.03	-1.83997	0.117119	-15.7102	1.28843e-55	4.3728e-53
YKR074W	447.412	-0.180717	0.11941	-1.51342	0.130174	0.473634
YMR274C	86.7347	-0.147848	0.180696	-0.818214	0.413235	0.780146
YER026C	400.979	0.162108	0.140426	1.1544	0.248336	0.642268
YMR201C	275.784	-0.0350724	0.125256	-0.280006	0.779473	0.946722
YLR069C	1238.19	0.0742799	0.109118	0.68073	0.496042	0.83434
YML042W	359.106	0.727879	0.154701	4.70506	2.53791e-06	7.75206e-05
YMR050C	375.219	0.915832	0.921051	0.994334	0.32006	0.707228
YDR069C	192.06	0.0814581	0.196813	0.413886	0.678958	0.913602
YOR298W	21.2479	-0.151109	0.329813	-0.458166	0.646833	0.900351
YEL066W	332.997	-0.240006	0.184156	-1.30328	0.19248	0.571378
YPR035W	23496.5	0.188247	0.134837	1.39611	0.16268	0.532876
YDR014W	116.796	-0.150356	0.315321	-0.476834	0.63348	0.8944
YDR227W	575.298	-0.0928924	0.154449	-0.601444	0.547544	0.862322
YPR060C	256.668	-0.12079	0.128072	-0.943144	0.345607	0.730812
YMR037C	627.745	0.190338	0.154405	1.23273	0.217678	0.605554
YCR038C	140.362	0.0306612	0.180401	0.169962	0.86504	0.968898
YNL257C	241.952	0.0954475	0.184854	0.516339	0.605618	0.881095
YCR072C	1093.32	-0.0889279	0.120282	-0.739328	0.459708	0.810083
YBR093C	479.685	0.989611	0.248298	3.98557	6.73173e-05	0.00145315
YNL092W	50.1051	0.318678	0.262673	1.21321	0.225048	0.616788
YGR045C	6.02023	-1.76873	0.723576	-2.44442	0.0145084	0.125363
YAL037C-B	23.6412	0.268383	0.359771	0.745983	0.455678	0.809499
YLR134W	83.9504	0.0551307	0.210412	0.262013	0.793311	0.950503
YMR203W	1483.97	0.0993304	0.0893537	1.11165	0.266287	0.660749
YKL096C-B	3.42254	0.752709	0.896584	0.839529	0.401172	0.773111
YPL225W	854.849	-0.0913655	0.0920815	-0.992224	0.321088	0.708388
YPL270W	647.658	-0.179152	0.100072	-1.79024	0.0734161	0.347098
YDL012C	211.554	0.0524544	0.156491	0.335192	0.73748	0.938237
YDR218C	21.059	-0.21752	0.369744	-0.5883	0.556331	0.862643
YLR299W	763.349	0.42868	0.115552	3.70984	0.000207389	0.00399666
YFL003C	42.2039	-0.163292	0.260747	-0.626247	0.531153	0.85309
YPL051W	183.16	0.0209478	0.137035	0.152865	0.878505	0.971334
YNL054W	544.921	0.0796748	0.118885	0.670186	0.502739	0.839307
YDR156W	374.888	0.091661	0.145385	0.630471	0.528386	0.851018
YPR155C	229.559	-0.212406	0.161884	-1.31208	0.189492	0.568194
YOR137C	176.906	0.300475	0.180348	1.66608	0.0956966	0.399052
YKL123W	81.1837	-0.0989614	0.198344	-0.498938	0.617823	0.886222
YKL172W	2078.42	-0.103763	0.122236	-0.848875	0.395951	0.769189
YNL336W	306.473	0.411701	0.145725	2.82518	0.00472535	0.0534247
YDR305C	143.853	-0.175637	0.148028	-1.18651	0.235421	0.626339
YJL057C	231.059	0.159507	0.170075	0.937866	0.348313	0.731904
YPR100W	533.522	-0.237657	0.108909	-2.18216	0.0290974	0.201309
YDR358W	166.344	0.181238	0.182329	0.994017	0.320215	0.707228
YJL152W	4.20298	0.6383	0.886304	0.720181	0.471413	0.818072
YLR096W	931.086	0.0038949	0.123862	0.0314455	0.974914	0.995729
YKR052C	116.547	0.000818688	0.180753	0.00452931	0.996386	0.999766
YLR427W	512.957	0.0354238	0.107348	0.32999	0.741407	0.939012
YDL152W	2.56204	-0.383874	1.05759	-0.36297	0.716627	0.930078
YGL015C	7.46449	0.0143546	0.660719	0.0217257	0.982667	0.997024
YEL064C	105.223	0.0397025	0.215449	0.184278	0.853796	0.964478
YMR127C	225.958	-0.267797	0.117962	-2.2702	0.0231953	0.174938
YIL140W	859.546	0.160084	0.114147	1.40244	0.160784	0.530076
YOL163W	22.9607	0.728239	0.353095	2.06244	0.0391655	0.240367
YLR197W	3896.31	-0.121933	0.1102	-1.10647	0.268523	0.662255
YBR213W	109.472	0.106225	0.163624	0.649201	0.516208	0.844594
YAL064W	2.69969	0.0453296	0.908426	0.0498991	0.960203	0.991489
YJL204C	202.533	-0.113741	0.247824	-0.458961	0.646262	0.900351
YLR244C	1635.96	0.0779239	0.113025	0.68944	0.490547	0.829665
YJR084W	276.173	-0.130907	0.124045	-1.05532	0.291281	0.685486
YLR233C	145.66	-0.341733	0.193894	-1.76247	0.0779897	0.358732
YDL238C	109.657	0.377041	0.172984	2.17963	0.0292852	0.201977
YGL084C	333.697	-0.110948	0.16355	-0.678375	0.497534	0.83546
YLR382C	671.039	0.0968241	0.125498	0.771519	0.440399	0.8
YLR154C-G	114.607	0.30471	0.214908	1.41786	0.156231	0.520685
YGR238C	132.785	0.0763273	0.169563	0.450141	0.652609	0.901988
YDR363W	318.923	0.107353	0.108905	0.98575	0.324256	0.711947
YNL114C	22.6973	-0.129757	0.395148	-0.328375	0.742628	0.939099
YNL163C	1574.68	0.0456121	0.109264	0.41745	0.67635	0.9123
snR55	2.10334	0.669835	1.45521	0.460302	0.645299	0.900351
snR54	7.27912	0.00137733	0.79656	0.00172909	0.99862	0.999766
snR57	6.70033	0.422113	0.922353	0.457648	0.647206	0.900351
YHR009C	792.037	0.0628373	0.156756	0.400862	0.688522	0.917578
snR50	9.09082	0.227393	0.552744	0.411389	0.680788	0.914401
YFR050C	1059.15	0.287877	0.0959049	3.00169	0.00268481	0.0346755
YLR331C	1.98491	0.415081	1.2031	0.345011	0.730086	0.933949
YNR069C	111.781	-0.571972	0.173688	-3.2931	0.000990881	0.0155213
YOL058W	5572.25	-0.937064	0.122106	-7.6742	1.66449e-14	1.25536e-12
YAR019C	240.268	0.069435	0.164763	0.421423	0.673446	0.9123
YOR024W	1.27744	0.46657	1.4002	0.333216	0.738971	NA
YML129C	311.984	0.0995024	0.183609	0.541925	0.58787	0.871619
YGL257C	390.893	-0.148233	0.1413	-1.04907	0.294148	0.688253
YGR020C	891.824	-0.063901	0.145414	-0.439441	0.660342	0.907311
YOR093C	437.168	-0.125282	0.210313	-0.595693	0.55138	0.862643
YAL046C	206.118	-0.526547	0.187254	-2.81194	0.00492437	0.0548825
YOR392W	11.5836	0.191197	0.422978	0.452026	0.65125	0.90113
YAL039C	1952.55	0.481116	0.185427	2.59463	0.00946923	0.0910985
YGR100W	580.892	-0.035813	0.10969	-0.326492	0.744052	0.939419
YLR403W	1131.85	-0.0245716	0.11089	-0.221585	0.824637	0.959197
YOL118C	6.8211	-0.795947	0.598109	-1.33077	0.183264	0.562083
YDR286C	109.831	0.0861849	0.175967	0.48978	0.62429	0.890077
YHR141C	5581.74	-0.416774	0.177745	-2.34479	0.0190379	0.151831
YPL128C	359.942	-0.226064	0.127444	-1.77383	0.0760911	0.35484
YJL091C	97.5637	-0.111079	0.230126	-0.48269	0.629316	0.891189
YBR191W	5871.97	-0.28129	0.160147	-1.75646	0.0790106	0.361284
YDR380W	6074.89	-1.06352	0.146625	-7.2533	4.0674e-13	2.88927e-11
YGR191W	1941.06	0.00441106	0.109723	0.0402017	0.967932	0.993116
YGR047C	382.493	0.0813155	0.168156	0.483573	0.628689	0.891189
YDR485C	736.229	0.100445	0.0945497	1.06235	0.288077	0.682988
YPL239W	675.72	-0.222666	0.154612	-1.44016	0.149823	0.507354
YPR183W	839.652	0.0742074	0.173983	0.426522	0.669727	0.911014
YOR206W	2227.77	-0.151161	0.150729	-1.00287	0.315924	0.704711
YEL049W	44.0701	0.508677	0.247188	2.05785	0.0396046	0.241944
YOR391C	138.082	0.739664	0.178581	4.14189	3.44459e-05	0.000821993
YDR525W-A	134.36	-0.0398842	0.212328	-0.187843	0.851	0.963625
YLR075W	18989.2	-0.212147	0.158414	-1.3392	0.180506	0.560035
YBR054W	4669.65	-0.385195	0.244349	-1.57641	0.114931	0.4418
YLR020C	431.88	-0.0943766	0.113147	-0.834107	0.404221	0.774519
YNL217W	372.069	-0.532368	0.104898	-5.07509	3.87318e-07	1.45161e-05
YLR404W	92.4503	0.146749	0.167172	0.877838	0.380032	0.759194
YIL013C	205.391	0.170196	0.171218	0.994034	0.320206	0.707228
YPL206C	613.787	0.089555	0.114843	0.779804	0.435506	0.796217
YDL060W	2035.54	-0.0671786	0.106121	-0.633035	0.526711	0.850173
YBR293W	354.349	-0.00137901	0.110883	-0.0124366	0.990077	0.997596
YNR052C	616.687	-0.0306168	0.0974061	-0.314321	0.753277	0.940564
YHR032W	946.262	0.153159	0.120787	1.26802	0.204792	0.587912
YEL032W	1151.26	0.000136222	0.120986	0.00112593	0.999102	0.999912
YOL076W	283.491	-0.177944	0.222542	-0.799597	0.423945	0.787436
YHR203C	8984.7	-0.250463	0.13994	-1.78979	0.0734884	0.347098
YML112W	253.028	0.10764	0.123394	0.872326	0.383031	0.762126
YLR154W-C	6.13202	0.0158825	0.724628	0.0219181	0.982513	0.997024
YGL241W	247.195	-0.260855	0.171906	-1.51743	0.129158	0.472833
YDL071C	3.27518	-0.476757	0.885726	-0.538266	0.590393	0.873296
YPR176C	297.223	-0.00921111	0.133812	-0.0688364	0.94512	0.987808
YDR057W	415.732	-0.0125312	0.104671	-0.11972	0.904705	0.975612
YJL036W	342.685	0.23019	0.13054	1.76337	0.0778388	0.358732
YER009W	1051.86	-0.1811	0.126937	-1.42669	0.153668	0.516177
YLR115W	484.378	0.178321	0.123996	1.43812	0.150401	0.508186
YGL114W	698.743	-0.13129	0.0938946	-1.39827	0.162033	0.531321
YER167W	1226.13	0.104063	0.084107	1.23727	0.215986	0.604628
YMR104C	1092.66	0.322575	0.153209	2.10545	0.0352519	0.226688
YER185W	15.4035	-0.243371	0.411671	-0.591178	0.554401	0.862643
YDL195W	1463.81	0.0147352	0.152114	0.0968698	0.92283	0.982735
YNL199C	630.162	-0.0791341	0.106381	-0.743878	0.45695	0.809499
YCR026C	936.584	0.148498	0.0805601	1.84332	0.0652827	0.327163
YBL052C	344.857	-0.269781	0.145829	-1.84998	0.0643157	0.325357
YBR076W	9.16414	0.824015	0.509544	1.61716	0.105843	0.423721
YNL317W	284.888	0.0284783	0.129034	0.220704	0.825323	0.959265
YLL019C	1686.51	-0.24119	0.151286	-1.59426	0.110877	0.434475
YOR156C	230.959	0.183701	0.124532	1.47513	0.140178	0.490714
YHR052W	1948.05	-0.0420357	0.138621	-0.303241	0.761706	0.943484
YKR026C	566.269	-0.00612971	0.111996	-0.0547316	0.956352	0.991279
YJR043C	210.101	-0.0517158	0.124098	-0.416733	0.676874	0.912607
YJR012C	92.2532	0.214807	0.255853	0.839574	0.401147	0.773111
YKL060C	61246.1	-0.0772103	0.154759	-0.498906	0.617845	0.886222
YCR044C	257.674	-0.0386592	0.111568	-0.346507	0.728962	0.933949
YKL035W	563.475	0.538398	0.183727	2.93042	0.003385	0.0412754
YLR264C-A	3.04002	-0.0111151	1.06265	-0.0104597	0.991654	0.997596
YNL073W	887.89	0.223717	0.110786	2.01936	0.0434503	0.255474
YMR280C	434.076	-1.12991	0.17611	-6.41593	1.39967e-10	8.2217e-09
YFL020C	30.5672	-0.130973	0.282435	-0.463728	0.642843	0.899432
YNL328C	27.921	0.313128	0.285251	1.09773	0.272323	0.668389
YJL014W	1705.44	-0.0680257	0.0957066	-0.710773	0.477225	0.821207
YMR031C	1112.71	-0.0534842	0.178743	-0.299225	0.764769	0.944848
YOR174W	254.354	-0.280617	0.138167	-2.031	0.0422547	0.250859
YPR149W	2159.29	0.132405	0.15117	0.875865	0.381104	0.760589
YNL015W	1231.41	-0.302962	0.125295	-2.418	0.0156063	0.132231
YCR084C	1379.01	-0.0123399	0.10278	-0.120062	0.904434	0.975612
YHR178W	235.294	0.141472	0.132294	1.06938	0.284898	0.680308
YDR260C	166.944	0.131021	0.159516	0.821368	0.411437	0.779128
YLR283W	160.322	-0.0616065	0.194378	-0.316941	0.751288	0.940564
YPL170W	837.102	0.255268	0.185232	1.3781	0.168173	0.542431
YPR001W	124.544	0.442941	0.20013	2.21326	0.0268794	0.193868
YDR204W	198.921	0.309031	0.155144	1.9919	0.0463825	0.267312
YBR085C-A	1034.8	0.567009	0.149714	3.78727	0.000152311	0.00303085
YDR251W	603.466	0.172075	0.15004	1.14686	0.251441	0.646069
YNL048W	445.188	-0.347855	0.123443	-2.81794	0.00483327	0.054177
YML057C-A	1.86293	0.440987	1.15961	0.380287	0.703732	NA
YOR074C	159.437	0.286989	0.140286	2.04573	0.0407825	0.246918
YPL028W	2640.28	-0.0918456	0.10531	-0.872142	0.383131	0.762126
YJR152W	163.415	0.0885929	0.150085	0.590286	0.554999	0.862643
YKL025C	454.61	0.0553626	0.137367	0.403026	0.686929	0.916655
YAR008W	116.983	0.0687431	0.157771	0.435715	0.663043	0.907594
YOR003W	161.558	0.186514	0.134944	1.38215	0.166925	0.540883
YOL097C	1338.05	-0.125588	0.115986	-1.08279	0.278903	0.675315
YOR110W	277.384	-0.103853	0.10843	-0.957783	0.338172	0.722846
YDR407C	412.649	-0.0960036	0.240226	-0.399638	0.689423	0.918014
YNR020C	280.283	-0.0881301	0.138357	-0.636975	0.524141	0.848188
YBR258C	104.86	0.0408824	0.156467	0.261284	0.793873	0.9506
YNL146W	11.4443	0.0414696	0.650685	0.0637321	0.949184	0.988883
YFR019W	490.168	0.206341	0.159698	1.29207	0.196333	0.574818
YLR262C-A	844.447	-0.363826	0.154086	-2.36119	0.0182163	0.147621
YBR223C	173.17	0.290381	0.1417	2.04927	0.0404355	0.245303
YNL241C	2347.96	0.277537	0.121151	2.29084	0.0219728	0.169271
YJL154C	717.742	0.209638	0.131173	1.59818	0.110002	0.433275
YDR091C	1913.91	-0.00891749	0.118319	-0.0753684	0.939922	0.985985
YJL123C	1163.29	-0.0226824	0.0996499	-0.227621	0.819941	0.958242
YHR066W	1580.71	-0.104774	0.111928	-0.936087	0.349228	0.731904
YPL047W	118.579	0.0903953	0.166623	0.542513	0.587465	0.871619
YER086W	2726.03	0.0479563	0.14285	0.33571	0.73709	0.938237
YLR287C-A	4512.04	-0.289181	0.148591	-1.94615	0.0516368	0.287556
RPR1	4.97144	-1.4841	0.739623	-2.00657	0.0447956	0.26013
YBR176W	170.889	0.00861646	0.138201	0.0623474	0.950286	0.989145
YDR207C	503.178	-0.033501	0.124574	-0.268925	0.787987	0.948944
YKL125W	823.707	0.112413	0.121767	0.923181	0.355913	0.737791
YDR373W	449.137	-0.169455	0.143373	-1.18192	0.237238	0.628486
YGL238W	899.3	-0.0328588	0.243131	-0.135148	0.892495	0.971645
YLR190W	656.964	-0.283362	0.121167	-2.33861	0.0193554	0.153761
YNL128W	50.8475	0.144677	0.231339	0.62539	0.531715	0.853455
YLR312C	387.589	0.00142493	0.165471	0.00861137	0.993129	0.998359
YKL191W	1069.68	-0.277702	0.106345	-2.61134	0.00901873	0.0877432
YNR006W	636.489	0.157598	0.122236	1.28929	0.197297	0.576142
YHR120W	353.938	-0.0501694	0.104278	-0.48111	0.630438	0.891515
YAR050W	269.39	0.812442	0.444962	1.82587	0.0678704	0.333564
YOL137W	336.426	-0.360195	0.12872	-2.79828	0.00513748	0.0567539
YDR530C	295.436	-0.326777	0.147107	-2.22136	0.0263266	0.190672
YER111C	261.169	0.0976116	0.215493	0.452968	0.650572	0.90113
YER144C	754.072	0.222406	0.094721	2.34801	0.018874	0.150918
YOL039W	4076.34	-0.295938	0.170048	-1.74032	0.0818032	0.369242
YIL083C	388.582	-0.319808	0.0981048	-3.25986	0.00111468	0.0170667
YHL011C	2481.51	-0.10011	0.11285	-0.887102	0.375024	0.754121
YGR184C	1003.6	0.00327443	0.176688	0.0185323	0.985214	0.997272
YMR303C	1154.19	0.528608	0.207064	2.55287	0.010684	0.0999522
YDR307W	176.141	-0.069203	0.244548	-0.282983	0.77719	0.946722
YDR411C	279.479	0.0337092	0.13536	0.249035	0.803334	0.951865
YBR205W	442.914	-0.126662	0.0991451	-1.27754	0.20141	0.583221
YOR321W	146.81	-0.168534	0.147889	-1.1396	0.254452	0.648613
YMR186W	13223	0.392452	0.166401	2.35848	0.01835	0.147889
YMR278W	509.465	0.322232	0.109295	2.94827	0.0031956	0.0394383
YLR136C	19.39	-0.667399	0.446205	-1.49572	0.134726	0.483572
YMR207C	478.064	-0.26854	0.112435	-2.3884	0.0169219	0.140648
YML015C	444.799	-0.10898	0.104301	-1.04485	0.296091	0.688522
YOR197W	777.164	-0.231136	0.0992465	-2.3289	0.0198641	0.156783
YKR089C	712.052	-0.012101	0.13681	-0.0884512	0.929518	0.983672
YDL041W	1.89937	0.599035	1.23414	0.485385	0.627403	NA
YKR072C	1590.97	-0.0967191	0.10462	-0.92448	0.355237	0.73664
YDL014W	5156.91	-0.0997469	0.118253	-0.843507	0.398945	0.772229
YER079W	184.766	0.49289	0.171102	2.88068	0.00396824	0.0466927
YER024W	869.257	0.771795	0.197958	3.89877	9.66815e-05	0.00201747
YOR230W	4590.3	0.417144	0.119299	3.49664	0.000471153	0.00810782
YGR234W	10816.6	-2.02452	0.158061	-12.8085	1.46926e-37	2.49326e-35
YMR178W	269.425	0.110437	0.139384	0.792324	0.428172	0.790481
YPR037C	319.287	0.132602	0.154276	0.859514	0.390057	0.767818
YEL068C	86.1237	-0.320508	0.205355	-1.56075	0.118582	0.448554
YNL090W	133.356	-0.00257878	0.189582	-0.0136025	0.989147	0.997596
YOR307C	432.498	-0.0492401	0.114572	-0.429774	0.66736	0.909282
YMR225C	395.19	-0.0620423	0.120484	-0.514944	0.606592	0.881722
YBR095C	359.89	-0.326696	0.126687	-2.57876	0.00991571	0.0948318
YDR036C	760.765	-0.349293	0.106629	-3.27576	0.00105376	0.0163387
YGR043C	1031.95	0.778284	0.168077	4.63052	3.64755e-06	0.000108697
YPL223C	1255.01	0.925594	0.442721	2.09069	0.0365555	0.232029
YPL272C	192.342	-1.11825	0.258199	-4.33098	1.4845e-05	0.000381043
YPR002C-A	32.6031	-0.230607	0.363849	-0.633799	0.526212	0.850173
YOL002C	1157.57	0.0406202	0.198556	0.204578	0.837902	0.961157
YFL005W	695.306	-0.142156	0.0860903	-1.65124	0.0986887	0.405986
YCR010C	40.8826	1.08266	0.366518	2.95389	0.00313791	0.0388883
YMR152W	457.506	0.175926	0.1326	1.32674	0.184594	0.562998
YDR154C	3628.68	0.457363	0.180416	2.53504	0.0112435	0.104191
YMR125W	1097.25	-0.237888	0.228281	-1.04208	0.297372	0.688522
YJR031C	360.219	0.0992978	0.166773	0.595408	0.551571	0.862643
YCL026C-A	5.65526	-0.625894	0.651489	-0.960712	0.336697	0.722339
YCL026C-B	187.767	0.0437964	0.185632	0.235931	0.813486	0.955322
YGR118W	5289.96	-0.351096	0.160406	-2.1888	0.0286117	0.199759
YJL055W	843.408	0.0533527	0.134411	0.396936	0.691414	0.919028
YPR102C	6036.49	-0.354811	0.185495	-1.91278	0.0557765	0.300476
YNL334C	136.521	-0.956902	0.191563	-4.99525	5.87603e-07	2.06303e-05
YGL123W	14591.5	-0.310512	0.147619	-2.10346	0.0354253	0.227564
YPL064C	361.396	-0.0293645	0.135006	-0.217505	0.827815	0.959733
YPL086C	934.043	-0.134291	0.0886139	-1.51547	0.129654	0.472833
Q0250	1.87024	-0.606672	1.39236	-0.435715	0.663044	NA
YPR153W	65.4375	-0.130978	0.233605	-0.56068	0.575016	0.868229
YMR042W	163.381	0.0362127	0.1634	0.22162	0.82461	0.959197
YLL003W	446.063	0.0111336	0.164711	0.0675944	0.946108	0.988237
YER042W	194.97	0.63499	0.170916	3.71522	0.000203031	0.00392505
YDR109C	517.715	-0.0171579	0.103345	-0.166025	0.868137	0.969021
YDR221W	430.656	0.0669356	0.104422	0.64101	0.521516	0.846164
YLR109W	5451.9	0.936977	0.236474	3.96229	7.42343e-05	0.00158013
YKR009C	409.892	-0.830754	0.165406	-5.0225	5.10035e-07	1.82211e-05
YMR078C	219.199	0.0561206	0.144016	0.389682	0.696772	0.921377
YLR094C	773.292	-0.308664	0.0947848	-3.25647	0.00112805	0.0172045
YBR037C	225.05	0.632886	0.145453	4.35114	1.35429e-05	0.000355081
YLR041W	16.8564	-0.470315	0.370218	-1.27037	0.203952	0.586602
YJR060W	161.119	0.125151	0.146554	0.853956	0.393129	0.769137
YNL161W	700.284	-0.00851186	0.0994299	-0.0856067	0.931779	0.984135
YIL146C	305.549	-0.0213106	0.126123	-0.168966	0.865823	0.968898
YLR195C	536.261	-0.0744202	0.113379	-0.656386	0.511576	0.843316
YLR231C	486.544	-0.0620164	0.0907348	-0.683491	0.494297	0.833677
YKL016C	2271.05	-1.68255	0.0807481	-20.837	1.99821e-96	4.06901e-93
YPL111W	813.284	-0.109773	0.201851	-0.543831	0.586558	0.871486
YKL174C	419.441	-0.20699	0.132913	-1.55734	0.11939	0.450219
YKL121W	341.034	0.196167	0.160598	1.22148	0.221904	0.611012
YLR380W	553.173	0.058548	0.133968	0.437029	0.66209	0.907594
YOR142W-B	4694.38	-0.00394701	0.160234	-0.0246328	0.980348	0.996845
YMR012W	2912.57	-0.429977	0.155951	-2.75712	0.00583133	0.0630506
YER093C	437.517	-0.116073	0.166074	-0.698923	0.4846	0.826017
YOR032W-A	6.67911	0.697477	0.562915	1.23905	0.215329	0.60413
YDL201W	684.709	-0.240057	0.144615	-1.65998	0.0969185	0.402737
YDR468C	328.738	-0.042516	0.108245	-0.392777	0.694484	0.920607
snR73	3.14027	0.276105	0.8503	0.324714	0.745397	0.939419
snR72	2.23218	-1.03025	1.37046	-0.751754	0.452199	0.808444
snR71	1.63763	-0.106739	1.26737	-0.0842208	0.932881	NA
snR70	18.081	0.341193	0.358425	0.951925	0.341135	0.726636
snR77	5.53122	0.564135	1.05302	0.535733	0.592143	0.874614
snR76	46.4087	-0.00211325	0.276353	-0.00764693	0.993899	0.998708
snR75	3.51959	0.0858216	0.970482	0.088432	0.929533	0.983672
snR74	1.90378	-0.922968	1.17848	-0.783183	0.43352	NA
YFR003C	142.178	0.399333	0.142039	2.81143	0.00493215	0.0548825
YIL033C	1315.16	0.376193	0.127719	2.94546	0.00322471	0.0397172
YOR368W	119.753	-0.0187354	0.160837	-0.116487	0.907267	0.975791
YGR128C	1163.82	-0.123284	0.15674	-0.786547	0.431547	0.792483
YIL048W	515.299	0.00683722	0.198846	0.0343845	0.972571	0.994679
YLR337C	618.441	0.0904097	0.147675	0.612219	0.540393	0.858867
YOL056W	194.721	-0.250326	0.15118	-1.65581	0.0977603	0.404345
YFR052W	771.385	0.272938	0.111318	2.45188	0.0142112	0.123658
YGR088W	1297.82	0.376171	0.205979	1.82626	0.0678112	0.333542
YGL073W	675.41	0.180054	0.130939	1.37509	0.169102	0.543335
YGL259W	10.9472	-0.378814	0.515145	-0.735353	0.462124	0.811707
YGR106C	974.208	-0.211812	0.161736	-1.30962	0.190326	0.56931
YIL168W	49.1569	-0.216177	0.237025	-0.912043	0.361746	0.744578
YGL086W	504.492	-0.149507	0.202474	-0.7384	0.460272	0.810083
YAL044C	481.994	0.0796517	0.199335	0.399587	0.689461	0.918014
YPR081C	244.577	-0.356965	0.143364	-2.48991	0.0127775	0.114287
YDR284C	268.617	0.305055	0.172984	1.76348	0.0778197	0.358732
YJL097W	209.273	-0.0745392	0.154109	-0.483679	0.628613	0.891189
YOR121C	4.78086	-0.520852	0.728965	-0.714508	0.474913	0.819935
YOR048C	1112.92	-0.0193207	0.0976691	-0.197818	0.843188	0.962099
YHR143W	2639.99	0.735481	0.0945937	7.77515	7.5358e-15	5.75452e-13
YMR315W-A	6.28542	1.27828	0.656083	1.94835	0.0513729	0.286692
YCL004W	197.278	0.296914	0.160508	1.84984	0.0643364	0.325357
YPL042C	348.664	0.0437751	0.128701	0.340129	0.733759	0.936309
YDR430C	766.46	0.262443	0.157153	1.66999	0.0949214	0.396903
YGL102C	14.4329	-0.521024	0.413993	-1.25853	0.2082	0.594064
YDR487C	1005.61	-0.172408	0.180332	-0.956056	0.339044	0.723496
YPR185W	244.193	0.144706	0.128864	1.12294	0.261463	0.656569
YER065C	1419.54	0.2872	0.423629	0.677952	0.497802	0.83546
YLR077W	551.14	0.0835144	0.0929484	0.898502	0.368918	0.750432
YBR056W	438.052	0.428414	0.12885	3.3249	0.000884491	0.014181
YLL020C	198.769	-0.4088	0.132995	-3.0738	0.00211353	0.0287562
YHR034C	141.199	-0.0476038	0.174048	-0.273509	0.784462	0.948306
YBL019W	162.948	-0.130238	0.140649	-0.925981	0.354456	0.73627
YOL070C	519.562	0.0538275	0.124314	0.432997	0.665017	0.907655
YJL085W	229.427	-0.0973604	0.197881	-0.492014	0.62271	0.88962
YPL200W	62.911	-1.54444	0.23599	-6.54449	5.96971e-11	3.6469e-09
YNR054C	608.926	-0.038784	0.1213	-0.319736	0.749169	0.940564
YDR130C	146.699	0.0905155	0.169879	0.532823	0.594156	0.876085
YIL015W	495.034	-0.215339	0.196625	-1.09518	0.273439	0.669783
YEL030W	119.027	0.190078	0.183106	1.03808	0.299235	0.688522
YBR291C	174.704	-0.0780791	0.275661	-0.283243	0.776991	0.946722
YML114C	612.651	0.0269573	0.138678	0.194388	0.845872	0.962099
YHR201C	685.938	-0.0478228	0.0911906	-0.524427	0.599982	0.878171
YNL299W	621.583	-0.0213543	0.0961418	-0.222113	0.824226	0.959197
YGR008C	880.599	0.377104	0.138105	2.73055	0.00632278	0.0668268
YNL311C	336.321	0.0944653	0.206876	0.456628	0.647939	0.900351
YPR170C	1.80943	0.462526	1.13397	0.407883	0.68336	NA
YJL030W	158.082	0.259376	0.154436	1.6795	0.0930549	0.393236
YGR248W	289.259	1.1234	0.220185	5.1021	3.35909e-07	1.27458e-05
YBR074W	555.383	-0.273744	0.112601	-2.4311	0.0150529	0.129155
YOR150W	395.726	0.138757	0.101006	1.37375	0.16952	0.544129
YML036W	91.9162	-0.00852351	0.1693	-0.0503456	0.959847	0.991489
YDL236W	797.787	-0.218611	0.10573	-2.06763	0.0386745	0.239187
YDL088C	601.273	-0.0183018	0.112143	-0.1632	0.870361	0.969908
YLR113W	1636.38	0.142855	0.139906	1.02108	0.307218	0.697435
YLR142W	99.1728	0.509159	0.197454	2.57863	0.00991939	0.0948318
YLL058W	366.395	-0.0916497	0.157422	-0.582191	0.560438	0.863626
YDL197C	248.669	0.124215	0.12536	0.990867	0.32175	0.708825
YER130C	632.429	-0.17255	0.0918551	-1.8785	0.0603131	0.314917
YER165W	7106.87	-0.0799701	0.11704	-0.683273	0.494435	0.833677
YMR106C	158.968	0.137511	0.159987	0.859517	0.390055	0.767818
YER187W	43.7628	-0.467751	0.288126	-1.62342	0.104499	0.420819
YGL112C	636.284	-0.0948217	0.0883563	-1.07317	0.283193	0.679782
YMR244W	154.17	-0.230892	0.326662	-0.706821	0.479678	0.82267
YDL008W	162.715	0.0194652	0.204418	0.0952225	0.924138	0.982735
YBL050W	693.627	-0.0203013	0.105165	-0.193043	0.846925	0.962401
YJR086W	146.539	-0.290187	0.169297	-1.71407	0.0865163	0.380101
YJR014W	977.731	-0.0190116	0.133598	-0.142305	0.886839	0.971334
YHR050W	547.647	-0.0617348	0.100681	-0.613175	0.539761	0.858798
YPL018W	53.7472	-0.0324813	0.23786	-0.136556	0.891381	0.971645
YJR041C	637.792	-0.146189	0.284533	-0.513785	0.607402	0.882011
YKR028W	984.545	-0.0549606	0.089534	-0.613851	0.539314	0.858798
YMR286W	320.532	0.035552	0.14144	0.251357	0.801538	0.951519
YDL175C	277.652	-0.0719086	0.130971	-0.549041	0.582977	0.868576
YKL168C	170.692	0.438913	0.134795	3.25616	0.00112932	0.0172045
YFL026W	1351.72	-0.15143	0.186757	-0.81084	0.417457	0.782047
YDL102W	452.525	-0.0983794	0.157948	-0.622861	0.533376	0.854737
YGL029W	451.711	-0.266449	0.192737	-1.38245	0.166835	0.540883
YDL128W	1116.27	-0.0624582	0.0867124	-0.720292	0.471345	0.818072
YPL098C	329.847	-0.0926264	0.147227	-0.629141	0.529257	0.851632
YMR033W	609.507	-0.0903473	0.145349	-0.621588	0.534213	0.854993
YPR003C	224.12	0.034875	0.159291	0.218939	0.826697	0.959733
YGR262C	321.833	-0.0815079	0.141553	-0.575814	0.564741	0.864854
YDR202C	199.122	0.145946	0.124016	1.17683	0.239264	0.630843
YGR215W	406.993	-0.0765792	0.156529	-0.489233	0.624676	0.890089
YDR253C	54.15	0.462979	0.312969	1.47931	0.139056	0.489294
YCR082W	965.348	-0.107464	0.0836671	-1.28443	0.198992	0.579429
YOR001W	1187.02	-0.0537423	0.0841582	-0.638587	0.523092	0.847406
YKL088W	428.398	-0.107276	0.112253	-0.955658	0.339245	0.723496
YEL075W-A	5.68793	0.509419	0.916636	0.555748	0.578383	0.86839
YLR276C	1815.01	-0.144151	0.0983445	-1.46578	0.142708	0.495384
YDL222C	273.527	0.788585	0.253707	3.10825	0.00188197	0.0263691
YNL140C	47.6522	-0.121572	0.465936	-0.26092	0.794154	0.950713
YOL095C	174.039	-0.08537	0.187254	-0.455906	0.648457	0.900351
YNR022C	374.84	0.0650823	0.1374	0.473672	0.635734	0.895481
YDR409W	351.978	0.0741392	0.143117	0.518033	0.604435	0.880078
YBR221C	2253.52	-0.0672728	0.0773415	-0.869816	0.384401	0.762324
YEL018C-A	1.30768	-0.583097	1.50266	-0.388042	0.697985	NA
YAL005C	25285.2	0.350127	0.135307	2.58764	0.00966351	0.0928213
YPL158C	411.377	0.151062	0.109411	1.38068	0.167376	0.541579
tG(GCC)P2	6.76044	0.616556	0.763113	0.807949	0.41912	0.783718
YJL121C	657.892	-0.111272	0.159187	-0.699004	0.484549	0.826017
YKL008C	330.091	0.349657	0.167143	2.09197	0.0364416	0.232029
YER158W-A	4.95644	0.406364	0.774964	0.524365	0.600025	0.878171
YBR103W	322.982	-0.00938702	0.114795	-0.081772	0.934828	0.985227
YNR004W	67.5973	-0.0131552	0.18766	-0.0701012	0.944113	0.987755
YPL032C	1309.7	-0.254394	0.14943	-1.70244	0.0886737	0.383917
YHR064C	3866.5	-0.15965	0.140415	-1.13699	0.255543	0.650192
YKL197C	294.278	0.180613	0.122598	1.47321	0.140694	0.491703
YMR020W	306.628	0.237815	0.120152	1.97929	0.0477833	0.273322
YDR206W	889.261	-0.227523	0.129427	-1.75792	0.0787609	0.361269
YDR377W	1183.07	-1.57034	0.112166	-14.0002	1.55394e-44	3.16434e-42
YIR007W	151.115	0.579177	0.170809	3.39079	0.000696919	0.0114448
YPL045W	381.052	0.00770661	0.134078	0.0574785	0.954164	0.990651
YLR314C	939.224	-0.101216	0.114287	-0.88563	0.375817	0.754971
YFR020W	87.405	0.171915	0.171883	1.00018	0.317221	0.706234
YNL126W	138.73	0.00716815	0.247746	0.0289335	0.976918	0.995848
YOR327C	666.893	-0.209102	0.129794	-1.61102	0.107175	0.427091
YOL139C	2690.66	-0.138727	0.12468	-1.11266	0.265854	0.660749
YBR207W	585.584	0.0945241	0.0972974	0.971498	0.331301	0.718349
YNL269W	17.8444	0.233067	0.358771	0.649627	0.515933	0.844594
YDR532C	151.211	-0.505207	0.175156	-2.88433	0.00392249	0.046439
YKL210W	2469.96	0.167616	0.112026	1.49622	0.134596	0.48339
YER146W	258.861	-0.33655	0.178023	-1.89049	0.0586928	0.310944
YHR159W	117.046	0.457017	0.207138	2.20634	0.02736	0.195742
YPL132W	265.296	0.199762	0.136921	1.45896	0.144575	0.497327
YIL114C	170.123	0.117543	0.148808	0.7899	0.429586	0.791526
YJL089W	95.1469	0.700678	0.293941	2.38374	0.0171378	0.142055
YMR301C	469.971	-0.278861	0.0917442	-3.03955	0.0023693	0.0316241
YJL217W	1038.82	0.297007	0.194986	1.52322	0.127703	0.470829
YBL029W	121.105	0.0255171	0.19411	0.131457	0.895414	0.97248
YMR188C	506.184	0.119107	0.109168	1.09104	0.275254	0.671817
YGR154C	168.489	0.279481	0.175564	1.5919	0.111407	0.435155
snR191	24.3938	0.00981013	0.358852	0.0273375	0.978191	0.996127
snR190	3.20973	0.0377742	0.919891	0.0410638	0.967245	0.992592
YOR389W	786.258	-0.00311164	0.161394	-0.0192797	0.984618	0.997024
YLR130C	1298.26	-0.0599103	0.0792239	-0.756215	0.44952	0.807031
YER022W	327.272	-0.0889154	0.149431	-0.595024	0.551827	0.862643
YBR140C	536.815	-0.00592947	0.168692	-0.0351498	0.97196	0.994424
YKR070W	336.731	-0.157443	0.142071	-1.1082	0.267775	0.66148
YGL262W	3.2821	0.81521	0.925799	0.880547	0.378563	0.758234
YMR205C	6527.56	0.0915498	0.07926	1.15506	0.248067	0.642268
YNL203C	17.9613	-0.14318	0.386105	-0.37083	0.710764	0.926801
YJL185C	167.379	0.42441	0.193051	2.19844	0.0279178	0.197437
YNL022C	730.306	-0.0645755	0.114325	-0.564844	0.57218	0.867641
YML017W	316.57	-0.129106	0.110974	-1.16339	0.244672	0.638489
YKR087C	383.534	-0.225388	0.122112	-1.84575	0.0649279	0.327154
YOR232W	1234.82	-0.0908506	0.0844226	-1.07614	0.281865	0.679445
YGR281W	704.221	0.299257	0.165972	1.80306	0.0713791	0.340934
YGR236C	17.559	0.421218	0.490644	0.8585	0.390617	0.76806
YKR091W	375.498	0.404349	0.213236	1.89625	0.0579271	0.307987
YHL013C	449.71	0.00504078	0.131026	0.0384717	0.969312	0.993506
YMR185W	570.297	-0.0889908	0.194413	-0.457742	0.647138	0.900351
YLR120W-A	1.23625	0.363361	1.36937	0.265349	0.790741	NA
YOR309C	237.077	-0.173259	0.164639	-1.05236	0.292636	0.68679
YBR097W	167.424	0.0182085	0.251928	0.0722767	0.942382	0.986664
YMR227C	399.45	-0.00607674	0.112811	-0.0538667	0.957041	0.991279
YDR030C	175.518	0.0411413	0.142797	0.28811	0.773263	0.946265
YPL221W	3604.17	-0.00506955	0.101736	-0.0498304	0.960258	0.991489
YPL274W	809.184	0.627263	0.180134	3.48219	0.00049733	0.00851033
YEL051W	930.401	-0.0820846	0.110446	-0.743208	0.457356	0.809499
YOL004W	1156.1	0.026971	0.15507	0.173928	0.861922	0.967197
YGR014W	2091.01	-0.0750016	0.157898	-0.475001	0.634786	0.895
YGR041W	354.538	0.166706	0.128503	1.29729	0.194532	0.573275
YER179W	28.1965	0.294676	0.299268	0.984659	0.324792	0.711947
YMR150C	216.614	-0.189229	0.134241	-1.40962	0.158652	0.525944
YML056C	4740.11	-0.0786385	0.128034	-0.6142	0.539083	0.858798
YFL007W	1253.23	0.234309	0.107505	2.17952	0.0292932	0.201977
YGL182C	4.64632	-0.0289314	0.667288	-0.0433567	0.965417	0.991773
YCR012W	47864.8	0.305402	0.14697	2.078	0.0377097	0.23531
Q0050	5.62147	-0.600541	0.736239	-0.815687	0.414679	0.780374
Q0275	1.5822	-1.73524	1.45322	-1.19407	0.23245	NA
YPL084W	438.951	-0.0130253	0.147707	-0.0881839	0.929731	0.983672
YDR354W	616.18	-0.197204	0.103781	-1.9002	0.0574065	0.306285
YDR301W	441.914	-0.115727	0.146538	-0.78974	0.42968	0.791526
YPR104C	635.961	-0.0478271	0.114023	-0.41945	0.674887	0.9123
YPR151C	268.695	0.121822	0.199406	0.610922	0.541251	0.859134
YOR381W-A	4.70546	-0.828058	0.69798	-1.18636	0.235479	0.626339
YNL332W	146.048	-0.212585	0.200867	-1.05834	0.2899	0.684265
YML028W	6569.4	-0.253557	0.181245	-1.39898	0.161819	0.531195
YLL001W	898.401	-0.543429	0.144992	-3.74798	0.000178263	0.00347926
YCL067C	239.777	-0.228743	0.154133	-1.48407	0.137791	0.487574
RPM1	4.35377	-1.42286	0.824359	-1.72602	0.0843446	0.374191
YCL001W	240.622	-0.114007	0.166954	-0.682864	0.494693	0.833677
YGR198W	830.152	-0.182014	0.170271	-1.06896	0.285086	0.680308
YDR223W	175.062	0.432683	0.253961	1.70374	0.0884302	0.383365
[truncated: 4,231 more rows]

## Sheet: deseq.pam.4h
	baseMean	log2FoldChange	lfcSE	stat	pvalue	padj
YAL008W	591.878	0.329798	0.120339	2.74058	0.00613317	0.0354916
YBR255W	447.516	0.143819	0.102348	1.4052	0.15996	0.38093
YGR164W	3.80186	0.628842	0.775737	0.810638	0.417573	0.665155
YGR131W	25.5406	-0.371615	0.334767	-1.11007	0.266968	0.522602
YNL003C	378.259	-0.0912963	0.0994956	-0.917592	0.358833	0.614906
YBR135W	612.382	-0.484201	0.162535	-2.97906	0.00289138	0.0196434
YBR160W	863.743	0.162488	0.102713	1.58197	0.113656	0.306688
YJL082W	1506.52	0.145297	0.175311	0.828793	0.407222	0.655372
YJL142C	42.3059	-0.457727	0.251626	-1.81908	0.0688993	0.219099
YPL191C	171.39	-0.00397285	0.186812	-0.0212666	0.983033	0.994829
YGL215W	3414.56	0.102483	0.108413	0.945304	0.344504	0.60343
YKL074C	752.843	-0.18239	0.0830986	-2.19486	0.0281734	0.118246
YJL077C	3.20474	-1.47389	0.957488	-1.53933	0.123724	0.323906
YKL096W-A	26186.3	0.262539	0.136311	1.92603	0.0541003	0.188265
YIL124W	586.256	-0.141311	0.156509	-0.902894	0.366582	0.621284
YPL039W	413.729	0.0816231	0.102946	0.792873	0.427852	0.67284
YNL170W	16.691	0.0916065	0.439237	0.208558	0.834793	0.930893
YGL141W	568.888	0.262752	0.145206	1.80951	0.0703721	0.221649
YJL179W	368.019	0.0603141	0.129121	0.467113	0.640419	0.824476
YDR316W-B	4166.37	0.367082	0.207501	1.76906	0.0768835	0.235149
YKL083W	7.35592	0.575734	0.8175	0.704262	0.48127	0.714897
YBR152W	239.68	0.0456407	0.122114	0.373755	0.708586	0.865047
YKL029C	5310.78	0.300788	0.170182	1.76744	0.077154	0.235748
YPL166W	106.726	0.485641	0.259875	1.86875	0.0616578	0.205255
YKL052C	453.774	0.140341	0.108982	1.28775	0.197832	0.432821
YHR025W	1679.08	-0.303282	0.138653	-2.18734	0.0287175	0.119792
YOL034W	731.633	-0.222333	0.118647	-1.8739	0.060944	0.203827
YBL008W	675.631	-0.1377	0.103796	-1.32664	0.184628	0.414987
YIL062C	969.699	-0.046859	0.139208	-0.336612	0.73641	0.881485
YOL116W	291.158	-0.275214	0.132263	-2.08082	0.0374508	0.14577
YDR196C	430.389	0.147135	0.114785	1.28183	0.199903	0.435995
YNL255C	2751.33	0.0239278	0.139543	0.171472	0.863853	0.944455
YNR032W	328.058	-0.0857707	0.11053	-0.775995	0.437752	0.683144
YNR045W	480.147	-0.138595	0.100363	-1.38093	0.167302	0.393084
YML105C	871.667	-0.181747	0.105089	-1.72945	0.0837282	0.249567
YNL288W	657.867	0.0498358	0.0825354	0.603811	0.545969	0.760629
YIL059C	157.192	0.551284	0.15368	3.58723	0.000334214	0.00315037
YIL004C	413.259	0.0313571	0.121076	0.258986	0.795646	0.909246
YNR018W	3728.44	0.145232	0.159468	0.910729	0.362438	0.617903
YPL144W	196.807	0.0443681	0.178537	0.248509	0.803741	0.912194
YFR047C	853.435	-0.178499	0.125704	-1.42	0.155609	0.374035
YER087C-B	875.072	-0.432714	0.14702	-2.94322	0.00324814	0.021603
YHR078W	448.822	0.0564269	0.138234	0.408199	0.683128	0.849189
YIR023C-A	1.27173	-0.36813	1.4863	-0.247682	0.80438	0.912375
YJR115W	59.45	0.256146	0.257722	0.993882	0.32028	0.57962
YLR355C	12302.7	0.118373	0.134033	0.883159	0.377151	0.629943
YGR099W	413.921	0.0466095	0.117656	0.39615	0.691994	0.854602
YLR300W	21402.2	0.293235	0.087921	3.33521	0.000852335	0.00709345
YCL028W	1468.39	-0.187928	0.0950219	-1.97774	0.0479586	0.172581
YJR140C	568.823	-0.131113	0.147215	-0.890618	0.373134	0.627475
YOR033C	768.368	0.0972448	0.137118	0.709208	0.478195	0.713123
YOR062C	193.216	0.47473	0.130069	3.64983	0.000262415	0.00253788
YBR043C	1071.7	-0.04267	0.0830541	-0.513761	0.607419	0.801913
YHR112C	908.286	0.0937012	0.122426	0.76537	0.444051	0.687883
YLR011W	133.929	0.230593	0.162603	1.41814	0.156151	0.374679
YIL044C	518.67	-0.128628	0.10356	-1.24206	0.214213	0.454053
YNL197C	1452.12	-0.152605	0.0832062	-1.83406	0.0666455	0.215346
YKR103W	182.566	-0.0312269	0.149031	-0.209533	0.834033	0.930684
YLR133W	512.486	-0.639144	0.11754	-5.43768	5.39788e-08	1.23701e-06
YER121W	71.9775	0.181924	0.202184	0.89979	0.368232	0.622745
YCR046C	740.265	0.143133	0.131271	1.09036	0.275554	0.532364
YNL144C	735.004	0.28968	0.0999143	2.89929	0.00374012	0.0241044
YKL204W	1111.17	-0.0110538	0.110809	-0.0997549	0.920539	0.967653
YOR266W	357.857	-0.0268133	0.115321	-0.232511	0.816141	0.919995
YDR393W	441.716	0.051999	0.115102	0.451764	0.651439	0.831051
YGL171W	1271.2	0.0340821	0.0954646	0.357013	0.721082	0.872321
YPR194C	1638.87	-1.17389	0.200442	-5.85651	4.72689e-09	1.28316e-07
YGR019W	1430.86	0.548432	0.106977	5.12664	2.94958e-07	6.05717e-06
YBL033C	3247.55	0.419518	0.154796	2.71014	0.00672554	0.0382202
tE(UUC)G3	1.66872	-0.524314	1.12692	-0.465263	0.641743	0.825487
YJL188C	20.1177	-0.196787	0.557145	-0.353205	0.723935	0.873167
YLL057C	57.1034	0.563948	0.235994	2.38967	0.0168633	0.0800155
YPL060C-A	15.6926	1.82327	0.634013	2.87577	0.00403048	0.0253912
YBR296C	106.003	0.0536407	0.177926	0.301477	0.763051	0.895088
YNL277W	129.928	0.066744	0.238733	0.279576	0.779803	0.900868
YMR040W	279.453	-0.781489	0.299834	-2.6064	0.00914989	0.0492924
YDR077W	86660.9	0.284839	0.117728	2.41946	0.0155436	0.0752783
YMR266W	2096.36	0.418945	0.123944	3.38011	0.000724562	0.00612681
YKR064W	516.74	0.027137	0.164376	0.165091	0.868873	0.946378
YPL089C	2477.43	0.276866	0.0949941	2.91456	0.00356193	0.0232141
YGR277C	478.679	0.0724099	0.124325	0.582424	0.560281	0.772463
YDL139C	172.093	0.336192	0.142466	2.3598	0.0182848	0.0852885
YDR246W	431.433	0.285362	0.122562	2.32831	0.0198955	0.09099
YOR288C	471.899	-1.19122	0.174407	-6.83015	8.48284e-12	3.17479e-10
YCR028C	675.613	-0.00495445	0.0927444	-0.0534205	0.957397	0.983841
YML054C	1410	-1.65638	0.353489	-4.6858	2.78865e-06	4.48809e-05
YLR179C	1907.68	-0.00702257	0.146908	-0.0478027	0.961873	0.985718
YOR141C	983.14	-0.0408885	0.091914	-0.444856	0.656424	0.834631
YPL280W	150.273	0.887705	0.208087	4.26602	1.98993e-05	0.000258977
YBL106C	132.307	-0.406025	0.181533	-2.23664	0.0253097	0.109384
YGL044C	478.714	0.036063	0.123618	0.291729	0.770494	0.897822
YER107C	687.646	-0.235988	0.121129	-1.94824	0.0513863	0.18117
YBR038W	872.867	0.0462797	0.163694	0.282721	0.777391	0.900426
YER076W-A	1.7001	-0.824979	1.16347	-0.709065	0.478284	0.713123
YGR259C	3.96776	0.690777	0.751326	0.91941	0.357881	0.614258
YEL047C	1290.98	-0.178584	0.120039	-1.48772	0.136824	0.345337
YPR016C	2377.09	0.0276037	0.128083	0.215514	0.829367	0.927301
YOR208W	1134.63	0.143681	0.148954	0.964601	0.334745	0.59445
YDL055C	19341.9	-0.131388	0.160837	-0.816899	0.413986	0.661546
YML009C	446.439	-0.138587	0.106022	-1.30716	0.191159	0.424143
YML072C	2360.71	-0.275603	0.0944327	-2.91852	0.00351702	0.0230281
YDR142C	353.993	0.133162	0.104439	1.27503	0.202299	0.43895
YFL044C	690.464	0.486667	0.0929787	5.23418	1.65723e-07	3.54121e-06
RDN37-2	6.42171	0.00885876	2.49302	0.00355343	0.997165	0.999082
YEL011W	289.291	-0.322548	0.310817	-1.03774	0.29939	0.558102
YKL019W	865.783	-0.232929	0.12958	-1.79757	0.0722447	0.225097
YJL130C	5300.15	0.14647	0.0999289	1.46574	0.14272	0.354697
YBL085W	1371.21	-0.0818709	0.0797487	-1.02661	0.304604	0.563503
YBR116C	54.147	1.74794	0.30656	5.70179	1.18556e-08	2.9639e-07
YDR166C	639.105	0.22432	0.157377	1.42537	0.154051	0.371531
YHR212W-A	1.42377	-2.16278	1.92432	-1.12392	0.261048	0.515334
YDR082W	554.1	0.0557479	0.131364	0.424377	0.671291	0.841942
YDR348C	1598.71	-0.148114	0.0989103	-1.49746	0.134274	0.341769
YKL182W	10583.4	-1.06479	0.122059	-8.72358	2.69542e-18	1.59332e-16
YKL018C-A	248.781	0.0919409	0.162876	0.564485	0.572424	0.780298
YPL027W	11.066	-0.502913	0.511088	-0.984004	0.325113	0.583729
YKL135C	1027.12	-0.0425447	0.143182	-0.297138	0.766361	0.896417
YLR363C	134.81	0.0187561	0.202425	0.0926571	0.926176	0.969557
YEL077W-A	1.85665	3.35503	1.70998	1.96203	0.0497596	0.176616
YDR179C	119.064	-0.203165	0.339867	-0.59778	0.549987	0.763703
YML089C	46.0597	-2.11405	0.295775	-7.14748	8.83844e-13	3.56071e-11
YLR431C	540.183	0.260376	0.109561	2.37653	0.0174763	0.0824787
YKR046C	3337.81	0.197195	0.116193	1.69713	0.0896718	0.262216
YJR005W	892.611	-0.0588813	0.132045	-0.445918	0.655657	0.834631
YJL116C	5941.56	1.53269	0.131005	11.6995	1.28251e-31	1.35197e-29
YMR030W	246.417	-0.492357	0.162556	-3.02884	0.00245495	0.0171765
YER030W	807.52	-0.0671287	0.128448	-0.522616	0.601242	0.799087
YIR026C	1217.7	0.258622	0.158649	1.63016	0.103068	0.288524
YJR072C	1480.12	0.140527	0.119033	1.18057	0.237773	0.483885
YDR515W	490.968	-0.121766	0.100112	-1.2163	0.223871	0.465773
YKR039W	371.871	0.309071	0.160931	1.92052	0.0547922	0.18947
YGL003C	631.898	0.0805149	0.102122	0.788419	0.430452	0.675753
YPL009C	1198.54	0.0765378	0.116414	0.657463	0.510883	0.735476
YDR268W	412.94	0.118437	0.107997	1.09666	0.272788	0.530072
YGL192W	3.86809	0.644319	0.751265	0.857646	0.391088	0.641985
YDL117W	1150.21	0.0444081	0.118453	0.374902	0.707734	0.864507
YMR131C	4672.3	0.222487	0.114642	1.94072	0.0522922	0.183582
YMR293C	376.849	0.29306	0.104181	2.81299	0.00490836	0.0296801
YJL214W	38.4386	0.0872346	0.245814	0.35488	0.722679	0.872682
YIL105C	543.644	-0.248105	0.143832	-1.72496	0.084534	0.251344
YML126C	3171.75	-0.217114	0.0991517	-2.18972	0.0285446	0.119344
YLR189C	757.132	0.153476	0.118899	1.29081	0.196769	0.431241
YIL150C	324.549	0.066341	0.112311	0.59069	0.554728	0.767639
YLR349W	45.3384	-1.74175	0.413951	-4.20762	2.58075e-05	0.000322594
YGL250W	129.981	-0.00819456	0.167509	-0.0489201	0.960983	0.985389
YBR212W	1173.1	0.343734	0.0862067	3.98732	6.68231e-05	0.000765681
YJR109C	1345.39	-0.392791	0.107775	-3.64456	0.000267853	0.00258258
YLR254C	392.752	0.615587	0.145986	4.21676	2.47836e-05	0.000311025
YGR085C	7811.3	-0.194543	0.133773	-1.45428	0.14587	0.359279
YPL105C	2584.55	0.0112632	0.100644	0.111912	0.910893	0.96409
YGR145W	1840.48	0.0958886	0.108198	0.886234	0.375492	0.628469
YJR094C	102.147	-0.443802	0.23695	-1.87298	0.0610712	0.204055
YKL177W	29.5686	-0.170958	0.345839	-0.494329	0.621074	0.810961
YGL154C	173.019	-0.0289533	0.14529	-0.19928	0.842044	0.935071
YBR129C	295.343	-0.246267	0.115132	-2.139	0.032436	0.131177
tK(UUU)D	14.4111	0.809195	0.407164	1.98739	0.0468788	0.170407
YMR322C	23.4024	3.13649	0.529118	5.92778	3.07062e-09	8.62103e-08
YKL099C	776.032	0.155979	0.118535	1.31589	0.188212	0.420205
YDR315C	122.527	-0.0986206	0.212446	-0.464216	0.642493	0.825751
YLR394W	552.525	-0.689544	0.109479	-6.29842	3.00697e-10	9.41538e-09
YNL104C	4076.18	-0.464873	0.104005	-4.46972	7.83239e-06	0.000114411
YNL151C	684.118	-0.131525	0.116143	-1.13244	0.257452	0.512622
YNR066C	323.628	0.528159	0.192949	2.73729	0.00619468	0.035696
YLR220W	902.775	-0.164764	0.0923799	-1.78355	0.0744969	0.229514
YHR006W	1531.6	0.0121692	0.0954436	0.127501	0.898544	0.959529
YMR232W	73.7803	0.346978	0.273098	1.27053	0.203898	0.440756
YNL083W	519.145	0.151682	0.0930543	1.63004	0.103093	0.288524
YGR038C-A	19.7332	-22.4348	3.38575	-6.62624	NA	NA
YGR038C-B	3779.13	0.0912553	0.143228	0.637135	0.524037	0.745509
YMR238W	2541.7	0.285754	0.103734	2.75467	0.00587509	0.034312
YER168C	717.189	-0.0682986	0.0891881	-0.765782	0.443806	0.687821
YPL265W	726.721	0.0820269	0.163006	0.503215	0.614813	0.80846
YOR227W	1066.98	0.171321	0.181396	0.944463	0.344933	0.603848
YOR081C	761.815	0.113452	0.0960904	1.18067	0.237732	0.483885
YEL026W	4086.21	0.279136	0.140523	1.98641	0.0469874	0.170508
YGR050C	13.9193	-0.404798	0.507279	-0.797978	0.424883	0.670171
YDR021W	462.627	0.0888402	0.134959	0.658274	0.510362	0.735149
YGL063W	164.826	-0.253111	0.163442	-1.54863	0.121471	0.319727
YPL212C	2256.29	0.26059	0.100806	2.58506	0.00973624	0.0517375
YOL157C	164.239	0.137304	0.187391	0.732717	0.463731	0.702027
YPR095C	683.275	-0.0930675	0.142369	-0.653708	0.5133	0.737534
YOR310C	5940.04	0.0562028	0.108637	0.517343	0.604916	0.801484
YDR188W	3808.61	-0.172026	0.119068	-1.44477	0.148523	0.36396
YOL128C	351.723	0.233545	0.114428	2.04099	0.0412523	0.155773
YGL236C	933.049	-0.167245	0.137443	-1.21684	0.223667	0.465666
YHR133C	588.456	-0.112787	0.1068	-1.05606	0.290942	0.550387
YDR017C	1513.28	-0.0784032	0.099358	-0.789098	0.430054	0.675297
YIL090W	1080.72	0.0445445	0.0890612	0.500157	0.616965	0.809438
YBR183W	237.641	0.331247	0.209092	1.58422	0.113145	0.305568
YOL048C	173.931	-0.558152	0.214247	-2.60518	0.00918252	0.0493453
YML039W	6.64786	-6.38375	1.30985	-4.87366	1.09549e-06	1.95183e-05
YCR007C	157.802	0.223735	0.157806	1.41779	0.156252	0.37478
YDR540C	117.418	-0.907274	0.349962	-2.59249	0.0095283	0.0509438
YEL004W	168.716	0.128249	0.180453	0.710709	0.477265	0.712509
YPR057W	409.641	8.70302e-05	0.0991262	0.000877974	0.999299	0.999827
YLL032C	322.077	0.335331	0.154182	2.17491	0.0296371	0.122439
YDR116C	924.437	0.0700722	0.105675	0.663094	0.50727	0.734375
YPL119C-A	16.3425	-0.0818892	0.629457	-0.130095	0.896491	0.959439
YDR299W	1885.32	-0.121062	0.0931297	-1.29993	0.193627	0.427465
YLR030W	125.309	0.626566	0.152129	4.11865	3.811e-05	0.000461774
YDR122W	990.404	0.0445022	0.156461	0.28443	0.776081	0.900151
YOL062C	1304.11	0.125604	0.0721182	1.74165	0.0815705	0.244936
YNL234W	441.842	0.36529	0.142886	2.55651	0.0105729	0.0551762
YLR467W	2746.61	0.0441801	0.121255	0.364357	0.715591	0.869268
YJL194W	536.685	-0.106165	0.239071	-0.444074	0.656989	0.834746
YOL015W	102.163	-0.610612	0.16765	-3.64218	0.000270337	0.0025986
YDL070W	2910.08	0.132237	0.128073	1.03251	0.301834	0.561005
YOR241W	804.787	-0.00282869	0.0808324	-0.0349946	0.972084	0.990693
YLR056W	7487.39	0.41695	0.122214	3.41166	0.000645697	0.00553392
YMR054W	1285.29	-0.25816	0.0764448	-3.37708	0.000732601	0.00618224
YKL110C	1132.97	0.0861116	0.113647	0.757713	0.448623	0.690802
YML100W-A	2.03558	0.102098	1.06528	0.0958414	0.923647	0.968859
YPR070W	560.997	0.0553645	0.129932	0.426103	0.670033	0.840994
YLR204W	654.162	0.240234	0.12902	1.862	0.0626035	0.20753
YML097C	870.564	-0.162572	0.0995724	-1.6327	0.102532	0.287589
YKR007W	305.94	-0.00413762	0.167871	-0.0246475	0.980336	0.992873
YDL096C	1.90089	-0.817511	1.58034	-0.517301	0.604946	0.801484
YHR193C	4918.43	-0.225767	0.123372	-1.82996	0.0672552	0.216122
YBL099W	8594.76	-1.85633	0.107519	-17.2652	8.59348e-67	3.62358e-64
YJR035W	518.327	0.183224	0.11987	1.52852	0.126384	0.328828
YOR126C	456.803	0.0522137	0.10824	0.48239	0.629529	0.816272
YMR023C	390.169	0.0742781	0.104327	0.711974	0.476481	0.712132
YOR119C	1538.91	0.234529	0.092551	2.53405	0.0112752	0.058122
YNL196C	7.40571	0.0275669	0.535036	0.0515234	0.958908	0.984068
YNL187W	470.94	0.453964	0.162089	2.80071	0.005099	0.0306862
YMR141C	19.7864	-0.702244	0.376869	-1.86336	0.0624111	0.207109
YLL014W	428.736	-0.186511	0.152149	-1.22584	0.220259	0.461915
YCR061W	245.832	0.14691	0.145988	1.00631	0.314264	0.573822
YPR115W	887.812	-0.0864583	0.13195	-0.655235	0.512317	0.736958
YHR088W	1400.12	0.116236	0.113029	1.02837	0.303774	0.56295
YBR017C	1179.17	0.20189	0.0842936	2.39509	0.0166164	0.0791406
YPR162C	357.93	0.157989	0.131949	1.19735	0.231169	0.475513
YGR166W	861.003	0.319272	0.137948	2.31444	0.0206436	0.093599
YDL161W	908.37	0.0600105	0.0933461	0.642881	0.520301	0.74282
YKL050C	267.786	0.215892	0.157237	1.37303	0.169742	0.395731
YJR055W	178.181	-0.000201757	0.142438	-0.00141646	0.99887	0.999827
YGL099W	1451.61	0.0373635	0.0997613	0.374529	0.70801	0.864678
YFL030W	960.035	-1.41437	0.104038	-13.5947	4.30511e-42	6.48329e-40
YIL119C	153.126	0.675589	0.236885	2.85197	0.00434488	0.0269591
YPL193W	838.676	0.180126	0.108657	1.65774	0.0973698	0.276917
YNL005C	1327.91	-0.102612	0.0674991	-1.5202	0.128461	0.332452
YJL144W	78.9944	0.891899	0.273267	3.26384	0.00109914	0.00884483
YBR012W-B	30.4862	-2.30734	1.63388	-1.41218	0.157896	0.377333
YLR379W	1.88922	1.05738	1.16006	0.911494	0.362035	0.617549
YJR139C	2381.99	-0.230145	0.0912024	-2.52345	0.0116209	0.0595643
YBR133C	715.08	-0.155454	0.0856845	-1.81426	0.0696381	0.22023
YBR162C	5327.75	-0.233172	0.107837	-2.16227	0.0305975	0.12575
YNL331C	310.809	0.243211	0.130142	1.86882	0.0616483	0.205255
YJL079C	4613.49	0.340298	0.118215	2.87865	0.00399381	0.0253115
YGL019W	957.839	-0.0216058	0.118126	-0.182905	0.854872	0.941178
YGR201C	346.829	1.00988	0.152831	6.60783	3.90004e-11	1.34797e-09
YNL172W	617.199	-0.167535	0.134048	-1.24981	0.211368	0.450549
YNL058C	964.076	0.439403	0.128007	3.43264	0.00059773	0.00519319
YPL160W	3701.06	-0.110922	0.0819463	-1.35359	0.175866	0.404052
YNL023C	1166.72	0.237813	0.106026	2.24297	0.024899	0.108238
YDR214W	2078.27	0.637821	0.14032	4.54546	5.48158e-06	8.31439e-05
YLR222C	2351.7	0.0965167	0.0914284	1.05565	0.291127	0.550387
YLR295C	2035.4	-1.50603	0.089112	-16.9005	4.46415e-64	1.56865e-61
YER175W-A	4.55097	-0.831582	1.13003	-0.735892	0.461796	0.701119
YHR168W	379.625	0.0415358	0.12212	0.340123	0.733764	0.879397
YOR064C	358.665	-0.700466	0.121232	-5.77791	7.56321e-09	1.96055e-07
YOR159C	278.888	0.0999636	0.116588	0.857405	0.391221	0.641985
YOL081W	943.299	0.167461	0.171848	0.974475	0.329821	0.588467
YOL036W	1926.73	0.0742761	0.0901428	0.823982	0.40995	0.657747
YGL148W	2908.42	-0.450473	0.146511	-3.07468	0.0021073	0.0151119
YOR031W	214.66	1.03445	0.161965	6.38687	1.69314e-10	5.49185e-09
YBR282W	540.618	0.341711	0.0932516	3.6644	0.00024792	0.00241792
YDR194C	2409.85	-0.0126753	0.0990672	-0.127946	0.898192	0.959529
YOL114C	34.4283	-0.0183934	0.328896	-0.0559247	0.955402	0.983085
YGR084C	940.775	0.0428877	0.0878494	0.488196	0.625411	0.81427
YNR030W	744.545	-0.578921	0.124073	-4.66597	3.07169e-06	4.88152e-05
YAL037C-A	3.86477	-1.23967	0.774222	-1.60118	0.109337	0.29961
YML007C-A	6.05367	0.539878	0.602882	0.895496	0.370522	0.624686
YBR018C	37722.9	0.311839	0.141261	2.20754	0.0272765	0.115401
YKL076C	98.9966	0.136447	0.174633	0.781335	0.434606	0.680221
YDR466W	1054.01	0.128836	0.102915	1.25187	0.210616	0.449347
YFR045W	276.182	0.0533531	0.123446	0.432197	0.665598	0.839464
YIL002C	693.738	-0.0534937	0.103447	-0.517113	0.605077	0.80149
YGR159C	22044.8	0.421299	0.150794	2.79387	0.00520807	0.0311942
YLR369W	685.832	0.0320638	0.111139	0.288501	0.772963	0.899373
YFR032C	118.746	-1.16938	0.622155	-1.87957	0.0601673	0.202281
YNL118C	1361.42	-0.0720091	0.087545	-0.822538	0.410771	0.658273
YGL228W	1297.8	-0.174253	0.0877547	-1.98569	0.0470681	0.170658
YJR117W	1254.13	-0.233398	0.121163	-1.92632	0.0540646	0.188265
YBR196C-A	5.45978	0.829105	0.648191	1.27911	0.20086	0.437177
YBR196C-B	8.71328	-0.31145	0.581133	-0.535936	0.592003	0.792637
YIL030W-A	40.5798	-0.0562528	0.237386	-0.236968	0.812682	0.917567
YLR357W	1120.88	-0.150485	0.0845422	-1.78	0.0750763	0.230962
YER127W	1542.73	0.134222	0.102798	1.30569	0.191658	0.424602
YBL015W	1486.92	-2.21023	0.162252	-13.6222	2.957e-42	4.56171e-40
YLR017W	1515.98	0.254524	0.140465	1.81201	0.069985	0.22111
YHR110W	807.109	-0.0523586	0.0935229	-0.559847	0.575584	0.782361
YBR041W	786.611	0.00478185	0.11479	0.0416574	0.966772	0.987499
YOR394W	10.468	0.212129	0.498214	0.425778	0.670269	0.840994
YDL220C	335.122	-0.0482229	0.110905	-0.434813	0.663698	0.838641
YDL039C	4498.83	0.123403	0.369178	0.334263	0.738181	0.881682
YKL202W	17.2236	-0.317447	0.420872	-0.754258	0.450694	0.691735
YGR122C-A	6.12062	0.145651	0.652035	0.22338	0.82324	0.923542
YOR264W	1045.17	-0.0754675	0.186324	-0.405034	0.685453	0.850262
YNL042W-B	4.87089	-0.106467	0.743815	-0.143136	0.886183	0.955362
YBL029C-A	312.412	0.0151242	0.180181	0.0839389	0.933105	0.972649
YOR008W-B	22.0861	-0.148684	0.346901	-0.428607	0.668209	0.840944
YOR366W	11.6848	-0.320268	0.428604	-0.747235	0.454922	0.696042
YNL275W	401.269	-0.194769	0.151204	-1.28812	0.197703	0.43269
YAR015W	1029.48	-0.130704	0.256719	-0.509132	0.610659	0.805174
YOR384W	5.41938	-1.25182	0.68656	-1.82332	0.0682557	0.217709
YLL051C	840.126	0.14935	0.0985711	1.51515	0.129734	0.334243
YDR427W	843.728	0.00532495	0.186198	0.0285984	0.977185	0.992005
YLR079W	1000.04	0.101729	0.126319	0.805331	0.420628	0.66712
YLR408C	93.0808	0.00866292	0.180542	0.0479827	0.96173	0.985718
YMR093W	1845.14	0.00331764	0.103216	0.0321426	0.974358	0.990901
YDR079W	279.447	0.0295717	0.146098	0.20241	0.839596	0.934004
YMR268C	305.413	-0.0279997	0.139906	-0.200133	0.841377	0.935044
YML070W	1446.38	0.0326022	0.0971484	0.335591	0.737179	0.881485
YHR175W-A	21.8139	-0.690808	0.364781	-1.89376	0.0582567	0.197803
YPR072W	934.584	0.00745301	0.0903176	0.08252	0.934233	0.97298
YMR108W	7146.27	-0.0997292	0.118522	-0.841444	0.4001	0.649046
YCR091W	250.829	0.313659	0.128879	2.43374	0.0149438	0.0729319
YER062C	7460.88	1.1395	0.18287	6.23122	4.62815e-10	1.41416e-08
YDR244W	693.471	0.0234848	0.0849546	0.27644	0.78221	0.901193
YER189W	145.823	0.347621	0.229961	1.51165	0.130623	0.335986
YDL137W	3595.7	-0.257064	0.117414	-2.18939	0.0285686	0.11935
YGR271W	696.39	-0.249653	0.12013	-2.07818	0.037693	0.146189
YDR233C	6956.86	-0.0592029	0.138173	-0.428469	0.668309	0.840944
YGR071C	377.037	0.0503574	0.241664	0.208378	0.834934	0.930893
YCR106W	112.152	-1.05353	0.206331	-5.10601	3.29026e-07	6.69161e-06
YBL100C	1.95675	-2.93848	1.35004	-2.17659	0.0295115	0.12216
YER109C	621.335	-0.108926	0.0858116	-1.26936	0.204313	0.441052
YDR489W	475.324	0.223449	0.121122	1.84483	0.0650627	0.212311
YPR049C	632.14	0.145817	0.138328	1.05414	0.291817	0.550804
YDL057W	250.973	0.427923	0.148459	2.88243	0.00394624	0.0250602
YGR257C	755.872	-0.0359418	0.0895208	-0.401491	0.688059	0.852325
YEL045C	17.134	0.506161	0.4466	1.13336	0.257061	0.512583
YPL235W	1428.62	-0.0891988	0.0880166	-1.01343	0.310854	0.570727
YLR122C	25.7759	0.360695	0.363209	0.99308	0.320671	0.580083
YBL087C	4279.92	-0.174605	0.138134	-1.26403	0.206219	0.443006
YJL132W	349.945	0.206781	0.16852	1.22704	0.219807	0.461426
YGL190C	859.587	0.0824299	0.186217	0.442656	0.658014	0.835077
YBR110W	675.341	-0.26171	0.127473	-2.05306	0.0400669	0.152451
YDR144C	699.592	-0.849466	0.104171	-8.1545	3.50622e-16	1.78846e-14
YFL046W	385.326	-0.0896265	0.110981	-0.807581	0.419332	0.666564
YOR103C	348.276	-0.357628	0.237334	-1.50686	0.131848	0.338174
YKL137W	511.349	0.0488192	0.108819	0.448627	0.653701	0.832928
YDR447C	6117.45	-0.285632	0.125323	-2.27917	0.0226572	0.100866
YGL009C	2359.72	-0.753504	0.145388	-5.1827	2.18696e-07	4.5803e-06
YPR145W	3854.87	-0.985443	0.110757	-8.89734	5.72029e-19	3.47893e-17
YJL063C	921.05	-0.0554327	0.10076	-0.550146	0.582219	0.786006
YMR149W	1123.19	-0.492488	0.0998566	-4.93195	8.14122e-07	1.47969e-05
YIR010W	639.483	0.159526	0.0968882	1.6465	0.0996611	0.281535
YDR331W	650.969	-0.275647	0.100668	-2.73819	0.00617782	0.0356847
YJL114W	6.78959	-0.0465318	0.829988	-0.0560633	0.955291	0.983085
YKR044W	766.468	-0.0636072	0.14364	-0.442823	0.657894	0.835077
YLR433C	444.105	0.0909499	0.106926	0.85059	0.394997	0.644962
YMR068W	227.508	0.155127	0.142619	1.0877	0.276727	0.533628
YLR157C-B	20.5389	0.264456	1.40902	0.187689	0.851121	0.939382
YNL164C	500.083	9.63701e-05	0.0951147	0.0010132	0.999192	0.999827
YER032W	638.553	-0.106238	0.111268	-0.954789	0.339684	0.598224
YJR070C	3488.5	-0.0460719	0.181336	-0.254069	0.799442	0.910256
YGL005C	777.599	0.459368	0.163008	2.81807	0.00483128	0.029298
YHR043C	1628.14	-0.503612	0.130525	-3.85836	0.000114149	0.00122788
YDL111C	1318.68	0.128992	0.0964304	1.33767	0.181004	0.409607
YMR133W	8.51762	0.99661	0.564685	1.7649	0.0775813	0.236711
YPL007C	309.698	-0.224559	0.16646	-1.34903	0.177329	0.40579
YKL159C	174.561	0.0250077	0.131314	0.190442	0.848963	0.938569
YDR507C	1810.43	-0.174045	0.116038	-1.4999	0.13364	0.340974
YKR075W-A	1.09747	1.04916	1.87579	0.559318	0.575945	0.782361
YLR138W	1902.97	0.0715718	0.065816	1.08745	0.276837	0.533677
YBR101C	835.007	0.0917784	0.0965194	0.95088	0.341665	0.600453
YLR396C	398.895	0.0674455	0.123711	0.545188	0.585624	0.788772
YBR245C	1115.2	-0.185301	0.0832968	-2.22459	0.0261087	0.111958
YJL216C	130.295	-0.280691	0.174878	-1.60507	0.108479	0.298311
YBR210W	190.618	-0.294063	0.151636	-1.93926	0.0524693	0.183809
YPL103C	453.056	0.0436609	0.121506	0.359331	0.719347	0.871456
YIL103W	666.996	0.163315	0.112557	1.45096	0.14679	0.360703
YIL152W	228.744	0.31253	0.133948	2.33322	0.0196368	0.0902075
YJR096W	583.139	0.349064	0.126799	2.75289	0.00590719	0.034436
YAL010C	277.912	-0.118425	0.106867	-1.10816	0.267795	0.523263
YGR143W	1477.06	0.470423	0.114338	4.11433	3.883e-05	0.000466034
YGR112W	480.993	0.131757	0.0918811	1.434	0.151573	0.368403
YLR256W	1825.52	0.0102707	0.184086	0.0557927	0.955507	0.983085
YHR174W	51613.6	-0.0485271	0.146492	-0.331262	0.740447	0.882148
YOR012W	83.4783	0.731645	0.224327	3.26151	0.00110821	0.00889519
YIR001C	521.126	-0.267761	0.0933765	-2.86754	0.00413678	0.0259061
YDL213C	1380.32	0.126691	0.149244	0.848885	0.395945	0.645382
YDR317W	95.7228	0.0570992	0.199876	0.285673	0.775129	0.899716
YDR478W	173.183	0.120754	0.137701	0.876926	0.380527	0.632329
YKL097C	2.01071	0.102732	1.0919	0.0940857	0.925041	0.969413
YNL106C	584.443	-0.0404891	0.0848194	-0.477357	0.633108	0.818862
YOR378W	16.9562	0.0888931	0.448859	0.198042	0.843012	0.935309
YFR015C	344.311	-0.120958	0.179203	-0.674979	0.499689	0.730212
YMR230W	5074.46	-0.213269	0.127658	-1.67062	0.0947967	0.272169
YIL092W	349.45	0.270369	0.147205	1.83668	0.0662569	0.21469
YAR009C	11854.9	-0.237422	0.139191	-1.70573	0.0880592	0.258457
YLR321C	647.519	0.057205	0.0817674	0.699607	0.484173	0.717524
YBR004C	614.755	0.060126	0.193115	0.311348	0.755536	0.891062
YGR052W	86.5535	1.48919	0.234433	6.35232	2.12089e-10	6.8036e-09
YJR161C	613.575	0.0241981	0.169738	0.142562	0.886636	0.955688
YOR278W	228.786	0.0160618	0.119285	0.13465	0.892889	0.958589
YNL085W	1360.52	-0.133786	0.144773	-0.924105	0.355431	0.613565
YGL061C	182.376	-0.145289	0.14423	-1.00734	0.31377	0.573822
YPL210C	1607.24	-0.146825	0.0981272	-1.49627	0.134584	0.34204
tS(AGA)G	3.71405	0.15079	0.785032	0.192081	0.847679	0.937993
YOR087W	461.918	-0.321896	0.157746	-2.04059	0.0412915	0.155828
YGL234W	3519.31	-0.334648	0.19121	-1.75016	0.0800914	0.24251
YOR347C	543.156	0.505196	0.116103	4.35129	1.35337e-05	0.000184484
YPR093C	249.436	0.522027	0.163411	3.19456	0.00140042	0.0107889
YAL029C	2118.51	0.191529	0.124057	1.54388	0.122618	0.32221
YOL155C	617.941	1.9046	0.375665	5.06994	3.97937e-07	7.86546e-06
YDR421W	483.202	-0.0148232	0.110837	-0.133739	0.893609	0.959117
YGR186W	1382.69	0.0737098	0.10078	0.731392	0.464539	0.70249
YDR294C	1022.52	0.113188	0.0812897	1.39241	0.163799	0.387446
YHR135C	1616.01	-0.0627094	0.097178	-0.645305	0.51873	0.74203
YBR181C	10826.3	-0.26286	0.138832	-1.89337	0.0583089	0.197803
YOR078W	1355.81	0.00424456	0.125889	0.0337168	0.973103	0.990693
YOR243C	1821.25	0.0663399	0.091156	0.727763	0.466759	0.704426
YMR165C	753.82	-0.0860165	0.0854688	-1.00641	0.314219	0.573822
YCR005C	870.163	0.125378	0.182149	0.688329	0.491246	0.722925
YPR055W	391.794	0.0996957	0.217166	0.459075	0.64618	0.827484
YIL016W	267.409	-0.3056	0.134879	-2.26574	0.0234671	0.103507
YLR032W	762.465	0.102896	0.122946	0.836921	0.402637	0.651992
YPR046W	115.778	-0.46196	0.194706	-2.3726	0.0176632	0.0830014
YBR099C	6.44457	-0.423152	0.697887	-0.606333	0.544293	0.759968
YBL027W	10472.6	-0.221814	0.133412	-1.66263	0.0963863	0.275448
YOL060C	1297.89	-0.0301158	0.116471	-0.258569	0.795968	0.909246
YOR382W	215.414	0.329065	0.16621	1.97981	0.0477247	0.172294
YNL232W	1085.9	0.182398	0.131987	1.38194	0.16699	0.39279
YDL076C	440.76	0.240227	0.115485	2.08015	0.0375114	0.145782
YDR120C	1858.5	-0.0125746	0.118461	-0.106149	0.915464	0.966179
YLR465C	23.6177	-0.428763	0.347801	-1.23278	0.217657	0.45813
YJL192C	765.153	-0.20939	0.102249	-2.04784	0.040576	0.153679
YEL020C-B	1.73388	-1.15253	1.34909	-0.8543	0.392939	0.643211
YLR054C	84.3332	0.396504	0.190182	2.08487	0.0370813	0.145136
YLR009W	2847.31	0.15784	0.114294	1.381	0.167278	0.393084
YKL116C	585.809	-0.120793	0.100172	-1.20586	0.227871	0.471625
YBR209W	1.46333	-1.87753	1.2779	-1.46923	0.141771	0.353172
YOR292C	151.109	-0.0903035	0.195509	-0.461888	0.644162	0.82677
YLR423C	314.377	-0.74081	0.242779	-3.05138	0.00227794	0.0161163
YLR105C	556.538	0.188109	0.101815	1.84755	0.0646679	0.211491
YML091C	2998.12	-2.28102	0.166272	-13.7186	7.8584e-43	1.27447e-40
YHR191C	150.079	-0.150126	0.14048	-1.06866	0.285222	0.544201
YDL098C	177.813	-0.0758034	0.151686	-0.49974	0.617258	0.809655
YLR202C	56.7037	0.174269	0.208659	0.835184	0.403614	0.652197
YKR005C	246.977	-0.053407	0.123354	-0.432959	0.665045	0.8391
YMR143W	6446.97	-0.231201	0.124763	-1.85312	0.0638648	0.210388
YCR063W	117.021	0.198227	0.153516	1.29124	0.19662	0.431213
YNL189W	3023.74	0.111894	0.0850797	1.31517	0.188454	0.4203
YFR024C-A	1139.02	0.105765	0.10047	1.05269	0.292481	0.551563
YCL047C	264.12	-0.411286	0.141443	-2.90779	0.00363989	0.0235527
YGL122C	2106.96	0.0529215	0.120993	0.437392	0.661827	0.837378
YDL018C	255.395	-0.340309	0.143211	-2.37628	0.0174883	0.0824787
YOR120W	4915.51	0.0535228	0.125666	0.425911	0.670172	0.840994
YPR160W	2517.57	0.254493	0.355225	0.716429	0.473726	0.70986
YBL060W	686.163	0.013815	0.0993996	0.138985	0.889462	0.956583
YDR065W	242.348	0.0779896	0.142995	0.5454	0.585478	0.788744
YBR019C	72644.7	0.38645	0.145974	2.64739	0.00811168	0.0443827
YKL056C	12282.8	-0.0717267	0.134697	-0.532505	0.594376	0.794301
YKL065W-A	83.8951	1.80966	0.286386	6.31896	2.63327e-10	8.32772e-09
YGR160W	25.005	-0.164692	1.02482	-0.160703	0.872327	0.947544
YPL068C	394.086	0.0514922	0.10086	0.510529	0.609681	0.804219
YJR057W	389.631	0.0431485	0.101073	0.426903	0.66945	0.840944
YGL211W	960.398	0.117397	0.11251	1.04343	0.296749	0.555556
YFL032W	11.3548	-1.33527	0.48072	-2.77764	0.00547547	0.0325492
YPL195W	856.388	-0.0577604	0.167077	-0.345711	0.72956	0.877031
YCL044C	741.83	-0.615046	0.113291	-5.42893	5.66933e-08	1.29453e-06
YAL059W	760.496	0.22993	0.153675	1.49621	0.134599	0.34204
YNL007C	830.16	0.598757	0.146179	4.09604	4.2027e-05	0.000500604
YPL148C	259.473	0.247806	0.135316	1.83132	0.0670531	0.215832
YJR137C	958.062	-0.328105	0.177912	-1.8442	0.0651536	0.212311
YMR021C	345.638	0.114283	0.149576	0.764048	0.444839	0.688259
YMR074C	624.291	-0.0907802	0.111666	-0.812964	0.416238	0.663863
YGR203W	205.614	-0.155034	0.158001	-0.981227	0.326481	0.584487
YJR039W	251.477	0.125631	0.176614	0.711334	0.476877	0.712387
YDL158C	25.3329	-0.0539401	0.31802	-0.169613	0.865315	0.9448
YOR104W	481.732	0.149895	0.116704	1.2844	0.199001	0.434628
YFL009W	916.016	-0.0721192	0.0828634	-0.870339	0.384115	0.635389
YLR297W	344.992	0.852031	0.173133	4.92125	8.59932e-07	1.55402e-05
YDR216W	2066.19	-0.509352	0.170714	-2.98366	0.00284823	0.0194337
YIL120W	283.643	0.117905	0.145739	0.809015	0.418507	0.665919
YBR030W	691.37	-0.489299	0.0819258	-5.97247	2.33689e-09	6.70084e-08
YPL162C	385.745	-0.606767	0.148012	-4.09945	4.14139e-05	0.000494232
YGR095C	816.361	0.346375	0.132325	2.6176	0.00885493	0.0479516
YCL027W	129.501	-1.03792	0.184148	-5.63633	1.73713e-08	4.27523e-07
snR5	31.2598	-0.0047929	0.277308	-0.0172837	0.98621	0.99548
snR4	102.601	0.440541	0.241324	1.82552	0.0679233	0.217021
snR9	39.19	0.121092	0.291655	0.415189	0.678003	0.844999
snR8	14.505	-0.190083	0.431526	-0.44049	0.659582	0.835876
YHR029C	182.946	0.126571	0.129878	0.974537	0.32979	0.588467
YIR021W-A	1.7839	-0.61534	1.18478	-0.519371	0.603502	0.800487
YAL033W	252.098	-0.164814	0.161432	-1.02095	0.307278	0.566012
YNL130C	772.008	-1.09686	0.14303	-7.66877	1.73659e-14	8.13623e-13
YNR036C	1080.48	0.0248777	0.0911683	0.272877	0.784948	0.902854
YNR049C	394.989	0.0300051	0.119246	0.251624	0.801332	0.911126
YDR192C	353.785	0.094931	0.160536	0.591337	0.554295	0.767394
YOL112W	1211.17	-0.235373	0.0818107	-2.87705	0.00401418	0.0253137
YML109W	831.48	-0.23348	0.105302	-2.21724	0.026607	0.113379
YOL083W	450.229	0.683492	0.166017	4.117	3.83836e-05	0.000463313
YNL251C	1522.82	-0.200892	0.147446	-1.36248	0.173046	0.400628
YBL004W	1365.03	-0.147369	0.155492	-0.947761	0.343251	0.602404
YER145C-A	10.8983	-0.0399035	0.4517	-0.0883408	0.929606	0.970991
YBR164C	505.669	-0.20777	0.0928867	-2.23682	0.0252984	0.109384
YHR074W	1099.72	0.0338609	0.100975	0.335338	0.73737	0.881485
YDR464W	1649.52	0.147855	0.0881639	1.67705	0.0935326	0.269519
YFR030W	1064.21	0.0821085	0.112275	0.731314	0.464587	0.70249
YJL146W	383.214	-0.235464	0.123328	-1.90926	0.0562292	0.192869
YKL078W	1101.82	0.121792	0.114612	1.06264	0.287944	0.547318
YIL055C	325.99	0.491347	0.103965	4.72606	2.28913e-06	3.79025e-05
YPL053C	1317.15	-0.246367	0.0862374	-2.85685	0.00427864	0.0266959
YLR351C	964.918	-0.132946	0.102226	-1.30052	0.193424	0.427256
YEL009C-A	8.22355	0.0500314	0.566102	0.0883788	0.929576	0.970991
YJR111C	545.459	0.166522	0.110974	1.50055	0.133473	0.340974
YIL030C	1573.7	-0.0738578	0.121619	-0.607288	0.54366	0.759676
YER125W	1818.3	-0.0211497	0.104683	-0.202036	0.839889	0.934004
YER152C	850.642	-0.162901	0.146872	-1.10914	0.26737	0.522756
YLR015W	500.489	0.207013	0.0971132	2.13167	0.033034	0.133083
YHR116W	299.079	0.386392	0.134214	2.87893	0.00399024	0.0253115
YPL259C	589.062	-0.195849	0.100799	-1.94297	0.0520192	0.183095
YOL100W	906.364	0.0499224	0.100295	0.497754	0.618658	0.810248
YOR039W	823.836	-0.081173	0.0803524	-1.01021	0.312393	0.572555
YDL037C	1659.28	0.165478	0.346482	0.477595	0.632938	0.818862
YLR334C	3.4877	-0.0433766	1.02823	-0.0421855	0.966351	0.987499
YHL043W	1.14728	1.64897	1.56036	1.05679	0.290609	0.55033
YOR364W	3.75065	0.049252	0.729735	0.067493	0.946189	0.979292
YOR386W	194.356	0.227539	0.20704	1.09901	0.271764	0.528732
YAR042W	2164.33	0.29631	0.129119	2.29486	0.0217411	0.0974575
YPR198W	569.904	0.266598	0.132225	2.01625	0.0437741	0.162579
YHL038C	375.793	-0.35055	0.110666	-3.16765	0.00153678	0.011627
YLL053C	323.682	-1.3293	0.258964	-5.13317	2.84907e-07	5.86983e-06
YDR425W	291.208	-0.00107853	0.201382	-0.00535565	0.995727	0.99842
YOR331C	3.99732	-1.15613	1.12826	-1.02471	0.305502	0.564888
YML076C	516.589	-0.0484601	0.116715	-0.4152	0.677995	0.844999
YKR060W	368.766	0.152352	0.116479	1.30797	0.190882	0.423922
YHR094C	16.2533	0.417613	0.406312	1.02781	0.304037	0.56295
YER069W	3198.22	-0.0380014	0.107333	-0.354051	0.723301	0.872836
YMR091C	720.548	-0.0217171	0.0918729	-0.236382	0.813136	0.917753
YER012W	1181.99	-0.101889	0.0991625	-1.02749	0.304188	0.563063
YHR098C	1864.38	-0.377286	0.0931971	-4.04826	5.15995e-05	0.000603266
YDL135C	682.647	-0.0819502	0.0932942	-0.878406	0.379723	0.631707
YCR093W	1513.35	-0.206956	0.172417	-1.20033	0.230013	0.473768
YGR273C	8.38803	-0.16545	0.630139	-0.262562	0.792888	0.907605
YGL080W	475.966	-0.424057	0.123593	-3.43107	0.000601205	0.00521622
YBR069C	7491.03	0.128983	0.103552	1.24559	0.212916	0.451911
YGR077C	815.242	0.195475	0.107905	1.81155	0.070056	0.22111
YDR040C	1354.64	0.293827	0.118884	2.47154	0.0134534	0.0670024
YPR012W	8.11888	-0.86281	0.522783	-1.65042	0.0988575	0.279765
YGR255C	1251.27	-0.0421921	0.121649	-0.346836	0.728714	0.876347
YDL051W	2448.21	-0.154824	0.130987	-1.18198	0.237214	0.483213
YBL102W	359.563	-0.318725	0.117912	-2.70307	0.00687028	0.0389378
tM(CAU)P	6.10996	0.332148	0.616527	0.53874	0.590066	0.792056
YPL237W	3316.31	0.112325	0.135699	0.827747	0.407814	0.655674
YLR120C	1922.48	-0.316986	0.0931046	-3.40462	0.00066255	0.00567068
YCL001W-B	12.1516	0.65901	0.498547	1.32186	0.186214	0.417596
YCL001W-A	7.78965	0.346425	0.572426	0.605187	0.545055	0.760061
YNL068C	1085.26	0.0266335	0.103442	0.257473	0.796813	0.909884
YJL169W	3.17981	1.0743	0.89208	1.20427	0.228486	0.472589
YBL002W	1752.18	-0.274377	0.116363	-2.35794	0.0183769	0.0855918
YDR146C	729.054	-0.0137815	0.107301	-0.128438	0.897802	0.959529
YBR112C	2029.74	-0.0382448	0.104523	-0.365899	0.71444	0.869151
YBL081W	1161.75	0.0961456	0.119488	0.804648	0.421023	0.667579
YFL040W	4.83965	-0.406209	0.735657	-0.552171	0.580831	0.784989
YNL326C	441.412	0.0533704	0.108487	0.491952	0.622753	0.81198
YDR337W	731.215	0.0289326	0.0899961	0.321487	0.747841	0.886616
YJL061W	734.125	-0.0998008	0.144391	-0.691184	0.48945	0.72213
YPR147C	450.705	-0.188371	0.100052	-1.88274	0.0597362	0.201081
YKL131W	4.99695	1.69375	0.77201	2.19395	0.0282389	0.118438
YDR441C	1086.94	0.332746	0.134691	2.47044	0.0134946	0.0671352
YPL094C	2370.79	-0.372051	0.137963	-2.69675	0.00700205	0.0394372
YOR101W	1791.3	0.313126	0.147404	2.12427	0.0336473	0.134781
YER020W	753.908	-0.022382	0.0978663	-0.2287	0.819102	0.921285
YDR231C	401.03	-0.669088	0.113376	-5.90148	3.60252e-09	9.99384e-08
YJL112W	853.841	-0.411263	0.108318	-3.79682	0.000146562	0.00153732
YFL066C	306.43	0.384854	0.173596	2.21695	0.0266266	0.113379
YNL193W	292.077	-0.076849	0.128249	-0.599218	0.549027	0.763332
YML058W	1395.54	-0.184747	0.124677	-1.48181	0.138392	0.34832
YBR188C	259.512	-0.130315	0.145797	-0.893809	0.371424	0.625968
YLR435W	610.539	0.0424007	0.126879	0.334181	0.738243	0.881682
YJR076C	1336.58	-0.317781	0.0962197	-3.30266	0.000957716	0.00784581
YKL157W	2295.61	-0.126751	0.120773	-1.0495	0.293949	0.553672
YBR003W	771.893	-0.397957	0.104184	-3.81974	0.000133592	0.00141774
YPR129W	1096.38	-0.201114	0.0748763	-2.68596	0.00723226	0.0403743
YDL113C	503.735	0.199289	0.146565	1.35973	0.173915	0.401904
YMR135C	659.476	-0.0153771	0.115883	-0.132695	0.894435	0.959224
YGL007W	5.57516	-1.0284	0.761985	-1.34964	0.177132	0.405486
YPL005W	284.986	0.0635684	0.159739	0.397952	0.690665	0.85455
YBR247C	1927.3	0.0936216	0.105133	0.890506	0.373194	0.627475
YLR185W	4334.67	-0.22451	0.138732	-1.61831	0.105596	0.292905
YJL210W	380.738	0.382307	0.115296	3.31586	0.000913601	0.00752412
YLR398C	1151.58	-0.180972	0.0924259	-1.95802	0.0502274	0.177777
YIL154C	562.829	0.400668	0.115654	3.46438	0.000531459	0.00474785
YIL101C	560.879	0.539808	0.127678	4.22787	2.35913e-05	0.000299027
YKL004W	1543.89	0.173972	0.100332	1.73396	0.0829258	0.247876
YPL154C	4726.83	0.378902	0.104084	3.64035	0.000272267	0.00261318
YPL101W	802.779	-0.137584	0.092014	-1.49525	0.134848	0.342246
YLR258W	808.18	0.21503	0.171594	1.25313	0.210159	0.448922
YBR178W	1.38939	-0.582961	1.31917	-0.441915	0.65855	0.835077
YJR098C	166.704	0.0884558	0.134021	0.660013	0.509246	0.73493
YHR176W	251.531	0.156577	0.117467	1.33294	0.182551	0.411782
YJR018W	6.78927	-0.632225	0.604316	-1.04618	0.295476	0.554731
YDL244W	116.443	0.273332	0.218739	1.24958	0.211452	0.450549
YDR319C	171.055	0.448874	0.221489	2.02662	0.0427018	0.160005
YKL095W	361.932	0.342692	0.115351	2.97085	0.00296973	0.0200038
YOL099C	1.95797	-2.15666	1.29535	-1.66493	0.0959264	0.27463
YIL094C	2343.89	-0.0483695	0.236386	-0.204621	0.837868	0.933342
YLR451W	937.388	0.0618373	0.0742104	0.833271	0.404692	0.653312
YFR017C	338.411	-0.0598924	0.190309	-0.314711	0.752981	0.89004
YLR342W-A	3.50829	0.00813518	0.883987	0.00920283	0.992657	0.996596
YIL076W	1798.93	-0.198392	0.0931807	-2.12911	0.0332449	0.133592
YNR077C	2.05331	-0.109148	1.25731	-0.0868111	0.930822	0.97137
YOL044W	293.035	0.0280816	0.180452	0.155618	0.876334	0.949943
YLR323C	310.635	0.12138	0.120355	1.00851	0.313208	0.573715
YOR085W	1064.39	-0.228691	0.117736	-1.94242	0.0520868	0.183231
YGR054W	4051.67	0.141965	0.0969468	1.46436	0.143096	0.355188
YOR050C	2.41695	-1.22606	1.03586	-1.18362	0.236562	0.482508
YNL087W	1456.77	-0.314383	0.106195	-2.96043	0.00307209	0.0206055
YLR318W	323.166	0.050352	0.168182	0.299389	0.764643	0.895459
YBR278W	277.731	0.216897	0.144827	1.49763	0.134229	0.341769
YNL024C-A	384.92	0.0245184	0.153128	0.160117	0.872789	0.947544
YDR296W	1006.85	0.139268	0.106866	1.3032	0.192507	0.426035
YGL232W	431.729	-0.14208	0.158201	-0.898098	0.369133	0.623603
YPR091C	768.167	-0.163262	0.145968	-1.11848	0.263364	0.517946
YGR141W	436.073	0.260445	0.121967	2.13538	0.0327299	0.132194
YAR030C	5.64371	0.40557	0.70308	0.576847	0.564043	0.774817
YGL111W	1388.12	0.0163009	0.099785	0.16336	0.870235	0.947137
YHR137W	1077.08	0.568728	0.0955241	5.95376	2.62056e-09	7.43276e-08
YFL011W	37.613	0.116494	0.30813	0.378067	0.705381	0.863228
YMR198W	250.959	0.225802	0.121603	1.85688	0.0633282	0.209056
YCR003W	546.502	0.13997	0.101778	1.37526	0.169052	0.394541
YMR316C-B	66.583	0.105853	0.193684	0.546527	0.584704	0.788146
YMR316C-A	2.53436	0.485306	1.11296	0.436051	0.662799	0.837771
YDR342C	8860.44	0.0264331	0.137171	0.192702	0.847192	0.937619
YMR163C	267.53	-0.179579	0.125076	-1.43576	0.151071	0.36765
YGR294W	9.20548	-0.776488	0.517843	-1.49947	0.133752	0.341108
YEL008W	3.9412	0.704426	0.772559	0.911808	0.36187	0.617456
YLL067C	204.386	0.944484	0.708035	1.33395	0.18222	0.411375
YBR020W	81728.4	0.192959	0.118745	1.62498	0.104167	0.290488
YLR418C	597.34	-0.0539606	0.0843238	-0.639922	0.522223	0.744268
YER059W	494.694	0.10532	0.0985446	1.06876	0.285179	0.544201
YNL076W	977.679	0.0612054	0.0754205	0.811523	0.417066	0.664636
YBL025W	171.616	0.0816082	0.133294	0.612243	0.540377	0.757815
YOL066C	709.102	0.133522	0.100323	1.33092	0.183215	0.412986
YDR126W	199.653	0.262014	0.130071	2.01439	0.0439685	0.163009
YPL216W	408.053	0.144927	0.103822	1.39592	0.162738	0.385657
YOR223W	153.558	0.035362	0.161175	0.219401	0.826338	0.926177
YEL022W	821.562	-0.235884	0.165779	-1.42289	0.154769	0.372636
YHR072W	1841.91	-0.0533612	0.0881408	-0.605409	0.544907	0.760061
YOL019W	1759.9	-0.232763	0.0803005	-2.89865	0.00374774	0.0241044
YLR463C	62.954	-0.233763	0.218927	-1.06777	0.285625	0.544522
YJL190C	5690.91	-0.294167	0.153275	-1.91921	0.0549576	0.189742
YMR218C	564.482	-0.232833	0.138341	-1.68304	0.0923673	0.267379
YNL265C	497.439	0.0901956	0.102084	0.88354	0.376945	0.629943
YNL230C	310.286	0.155444	0.112802	1.37802	0.168196	0.394068
YLL049W	296.194	0.262768	0.122428	2.1463	0.0318487	0.129712
YHR211W	607.428	-0.0109699	0.0962902	-0.113925	0.909297	0.964008
YPR166C	427.13	-0.322099	0.133206	-2.41805	0.015604	0.0755131
YJL042W	1173.74	-0.154381	0.151864	-1.01657	0.309358	0.56897
YNL301C	1569.42	0.140395	0.0969063	1.44877	0.147401	0.361641
YDR333C	929.904	-0.0733358	0.104164	-0.704038	0.481409	0.714936
YMR058W	435.163	-0.892634	0.155617	-5.73611	9.68753e-09	2.47071e-07
YDR061W	637.578	0.120865	0.0892371	1.35443	0.175601	0.403851
YJR112W-A	296.332	0.0735576	0.108163	0.680061	0.496466	0.72739
YOR290C	1499.74	-0.139125	0.115687	-1.2026	0.22913	0.473147
YKL114C	782.487	-0.0226449	0.0906501	-0.249806	0.802737	0.9119
YML024W	7936.05	-0.322545	0.131302	-2.45651	0.0140293	0.0691624
YML093W	2758.16	0.129237	0.1041	1.24148	0.21443	0.454361
YHR197W	1330.28	0.0844149	0.137088	0.615772	0.538045	0.756338
YDR276C	1704.83	-0.00527692	0.0998225	-0.052863	0.957841	0.983954
YLR200W	479.994	-0.0862718	0.128184	-0.673031	0.500928	0.730691
YKR003W	455.482	-0.128943	0.140053	-0.920677	0.357219	0.614258
YLR107W	1436.89	0.654822	0.129844	5.04316	4.57903e-07	8.85699e-06
YMR321C	4.32668	5.39155	3.39148	1.58973	0.111895	0.30375
YER175C	253.645	0.43589	0.14885	2.92839	0.00340726	0.0224022
YIR012W	2862.34	0.170831	0.13454	1.26974	0.204177	0.441037
YDL183C	271.696	0.169563	0.125946	1.34631	0.178203	0.407054
YPL278C	336.035	0.698676	0.120254	5.81001	6.24675e-09	1.66712e-07
YMR105W-A	1.76854	1.86629	1.49088	1.2518	0.210643	0.449347
YMR118C	175.249	1.43062	0.292336	4.89373	9.89427e-07	1.77284e-05
YCL049C	1015.48	0.120147	0.106413	1.12906	0.258874	0.513428
YBL066C	1041.82	-1.0107	0.120321	-8.40004	4.46333e-17	2.38113e-15
YGL120C	4721.92	0.2075	0.155482	1.33456	0.182022	0.411375
YGR271C-A	683.781	0.135144	0.140325	0.963078	0.335508	0.59509
YDR169C	1036.9	-0.190953	0.0917199	-2.08191	0.0373503	0.145737
YOR057W	630.486	-0.0498332	0.126485	-0.393985	0.693592	0.85566
YLR410W-A	887.086	-0.508902	0.759877	-0.669716	0.503039	0.731934
YLR169W	1.43202	-0.651421	1.40944	-0.462183	0.64395	0.826678
YMR272C	2064.09	0.484328	0.114831	4.21773	2.46772e-05	0.000310305
YPR108W	1338.91	0.00329749	0.0852751	0.0386688	0.969154	0.988534
YKL054C	4374.45	0.0461418	0.0797365	0.578679	0.562806	0.774195
YGR162W	6097.81	0.0423951	0.105049	0.403576	0.686524	0.851258
YDL165W	400.023	0.0106208	0.15484	0.068592	0.945314	0.978739
YDR520C	396.231	0.22739	0.142301	1.59796	0.110053	0.300893
YKL023W	336.156	0.104583	0.132374	0.790057	0.429494	0.674752
YJR051W	816.876	0.0583483	0.123928	0.470825	0.637766	0.822735
YNL009W	247.566	0.0851908	0.124279	0.685479	0.493041	0.72454
YFL034W	568.526	-0.0785701	0.131634	-0.596883	0.550585	0.764198
YKL164C	5420.48	-0.123344	0.135965	-0.907171	0.364316	0.618936
YJR135C	167.305	0.044382	0.159465	0.278318	0.780768	0.901057
YGL213C	539.75	-0.197832	0.0996603	-1.98507	0.047137	0.170734
YMR076C	690.701	-0.156512	0.190235	-0.822726	0.410664	0.658273
YOR161W-B	1.35477	1.61145	1.58814	1.01468	0.310258	0.569962
YNL027W	667.408	0.0850534	0.120114	0.708106	0.478879	0.713123
YLR291C	805.466	-0.175119	0.0791132	-2.21352	0.0268616	0.114027
YDR210W	284.666	-0.34632	0.179664	-1.9276	0.0539047	0.188161
YIL122W	686.995	0.449038	0.0931741	4.81934	1.4403e-06	2.48227e-05
YDL230W	301.187	0.234699	0.11324	2.07259	0.0382107	0.147717
YJR113C	1143.99	-0.127536	0.103826	-1.22836	0.219311	0.460692
YGL075C	245.722	-0.0473832	0.115052	-0.41184	0.680457	0.847056
YHR041C	261.325	-0.421024	0.13719	-3.06891	0.00214841	0.0153545
YIL156W-B	444.967	-0.020671	0.158045	-0.130792	0.89594	0.959439
YIL156W-A	2.29062	-1.19151	1.07703	-1.1063	0.268599	0.524348
YLR416C	1.48138	0.415128	1.36021	0.305194	0.760219	0.894028
YGR097W	3016.57	0.338447	0.0817194	4.14157	3.44933e-05	0.000422018
YIL068C	612.353	-0.229608	0.113997	-2.01416	0.0439931	0.163009
YCL025C	5053.6	0.00383102	0.135995	0.0281704	0.977526	0.992005
YNR034W	202.673	0.0524696	0.202266	0.259408	0.79532	0.909163
YOL085C	1.53829	0.474828	1.33851	0.354744	0.722781	0.872682
YNL282W	273.619	0.247124	0.154579	1.59869	0.10989	0.300759
YBR286W	3388.35	0.194725	0.104196	1.86884	0.0616455	0.205255
YGL144C	558.022	0.102444	0.112785	0.908311	0.363714	0.618925
YDR190C	2186.98	0.131148	0.0843497	1.55481	0.11999	0.317659
YAL031C	508.515	0.0906439	0.151729	0.597405	0.550237	0.763883
YBL006C	424.73	0.197978	0.150828	1.31261	0.189316	0.421331
YNL132W	2414.64	-0.0279122	0.104032	-0.268305	0.788465	0.904713
YBR264C	222.676	-0.018594	0.152479	-0.121945	0.902943	0.961305
YBR231C	430.619	0.208058	0.133953	1.55321	0.120373	0.317896
YPL197C	5.39311	0.358523	0.982637	0.364858	0.715217	0.869268
YHR076W	604.606	-0.0806868	0.0920847	-0.876224	0.380908	0.632348
YDR462W	505.346	0.310165	0.117153	2.64752	0.00810854	0.0443827
YJL148W	1630.21	0.177452	0.139876	1.26864	0.204571	0.441307
YIL057C	374.866	-0.330576	0.261299	-1.26512	0.205827	0.442657
YPL055C	523.486	0.135301	0.154944	0.873224	0.382541	0.633953
YLR353W	493.093	-0.186287	0.119979	-1.55266	0.120505	0.31811
YIL020C	302.077	-0.0877727	0.131901	-0.665444	0.505766	0.733541
YIL148W	8382.04	-0.173668	0.141	-1.23169	0.218065	0.458837
YNR016C	10340.2	-0.942406	0.0754408	-12.492	8.25558e-36	1.04433e-33
tY(GUA)J1	1.27348	-0.0985873	1.48883	-0.0662181	0.947204	0.979533
YFR036W	243.963	0.304593	0.147651	2.06292	0.03912	0.150233
YHR114W	651.653	0.0199531	0.109247	0.182642	0.855079	0.941241
YGR028W	880.038	-0.459818	0.130151	-3.53294	0.000410964	0.00375985
YER150W	1202.22	0.925946	0.117527	7.87861	3.31046e-15	1.62315e-13
YNL279W	65.7781	-0.3316	0.196081	-1.69114	0.0908109	0.264283
YDR400W	600.933	-0.923071	0.110906	-8.32299	8.57753e-17	4.52107e-15
YDL068W	1.5248	-0.823105	1.43967	-0.57173	0.567505	0.77635
YOL027C	2683.11	-0.32201	0.100917	-3.19085	0.00141855	0.0108888
YPL257W	64.3942	0.274431	0.205006	1.33865	0.180685	0.409323
YPL120W	207.32	0.171668	0.156524	1.09675	0.272751	0.530072
YOL145C	1633.05	-0.022757	0.114011	-0.199604	0.84179	0.935071
YJL099W	560.488	0.179398	0.117516	1.52658	0.126865	0.329673
YHR149C	1320.77	0.0472975	0.140534	0.336556	0.736452	0.881485
YDR395W	1950.09	0.0451969	0.103283	0.437602	0.661675	0.837366
YOL110W	270.379	0.110258	0.137986	0.799057	0.424257	0.669762
YDR005C	838.384	0.0515584	0.130185	0.396039	0.692077	0.854602
YMR311C	1022.56	0.0614921	0.0976705	0.629587	0.528965	0.74915
YBL039C	4322.8	0.04708	0.121093	0.388792	0.69743	0.858553
YGR188C	304.737	-0.200759	0.108612	-1.84841	0.0645427	0.211331
YOR362C	1736.71	0.109015	0.0813834	1.33952	0.180401	0.408903
YPR106W	268.948	0.360721	0.129196	2.79205	0.0052376	0.0313117
YLR126C	443.124	-0.692456	0.17943	-3.85921	0.000113756	0.00122574
YDL053C	981.671	-0.0742037	0.0806759	-0.919776	0.35769	0.614258
YML074C	2359.86	-0.207102	0.131998	-1.56898	0.116652	0.312505
YKR062W	825.802	0.304575	0.102391	2.97463	0.0029334	0.0198436
YBR235W	949.91	0.0728298	0.087753	0.829941	0.406572	0.654843
YER010C	444.95	0.1417	0.0946828	1.49658	0.134503	0.34204
YML003W	89.3825	0.157073	0.225304	0.697163	0.485701	0.71861
YMR097C	468.815	-0.186024	0.107055	-1.73765	0.0822731	0.246624
YDL133W	556.029	-0.0195889	0.147037	-0.133224	0.894016	0.959224
YNL330C	745.865	-0.0533731	0.082521	-0.646782	0.517773	0.741434
YGR228W	14.0488	0.152144	0.521466	0.291762	0.770469	0.897822
YHR096C	875.366	1.16875	0.174218	6.70853	1.96598e-11	7.14644e-10
YBR008C	436.719	0.269695	0.109289	2.46773	0.0135972	0.0674216
YDL035C	1097.49	0.0535606	0.0902304	0.593598	0.552781	0.765902
YMR253C	173.753	0.190109	0.170831	1.11285	0.265772	0.52092
YCR102C	55.9298	-0.180636	0.358341	-0.50409	0.614198	0.808156
YJL127C-B	382.185	-0.227286	0.166248	-1.36715	0.171579	0.397959
YOR257W	307.359	-0.0725275	0.101597	-0.713876	0.475304	0.711325
YGR002C	479.495	0.156437	0.102701	1.52322	0.127703	0.331305
YEL041W	228.621	0.0337411	0.171836	0.196356	0.844332	0.936101
YGR075C	88.7622	-0.0645379	0.211575	-0.305036	0.760339	0.894028
YGR253C	1552.49	0.0848385	0.0856335	0.990716	0.321824	0.580083
YDR510W	1524.83	-0.184101	0.147101	-1.25153	0.210741	0.449406
YPL050C	1745.52	-0.19667	0.0676394	-2.90763	0.00364182	0.0235527
YMR166C	342.102	-0.088181	0.130678	-0.674797	0.499804	0.730212
YPR045C	357.125	0.0677815	0.121642	0.557222	0.577376	0.782662
YPL231W	12830.8	-0.956839	0.131658	-7.26761	3.65913e-13	1.58521e-11
YLR148W	454.654	0.21966	0.168858	1.30085	0.193308	0.427256
YMR137C	304.691	-0.0155185	0.145287	-0.106813	0.914938	0.966179
YDL082W	5932.01	-0.114773	0.151412	-0.758015	0.448442	0.690802
YKL155C	996.383	0.117204	0.0820569	1.42833	0.153197	0.370686
YBR162W-A	899.069	-0.390639	0.176588	-2.21215	0.0269564	0.114276
YFL042C	540.661	0.093357	0.121496	0.768397	0.442251	0.686776
YBL083C	174.799	-0.136662	0.163508	-0.835817	0.403258	0.652197
YDR148C	3158.86	-1.55218	0.104405	-14.8669	5.4081e-50	1.05979e-47
YHR052W-A	187.433	0.481555	0.178271	2.70125	0.00690804	0.0390468
YPL096W	279.349	0.075786	0.127198	0.595809	0.551303	0.76498
YDR335W	1174.83	-0.113814	0.137078	-0.830282	0.40638	0.654843
YPR141C	322.097	-0.0428696	0.189483	-0.226245	0.821011	0.922009
YMR039C	859.385	-0.20292	0.123607	-1.64166	0.100661	0.2836
YIL058W	9.9346	0.901468	0.490955	1.83615	0.0663352	0.214834
YNL320W	321.074	-0.113514	0.122672	-0.925346	0.354786	0.613455
YPL078C	3153.15	-1.57603	0.0798822	-19.7294	1.20614e-86	1.08984e-83
YCR095C	324.224	0.000707521	0.126514	0.00559241	0.995538	0.99842
YLL011W	1536.25	0.0283788	0.0885402	0.320519	0.748575	0.887153
YCR077C	2150.77	0.0222262	0.101689	0.21857	0.826985	0.926177
YLR437C	245.143	0.393883	0.139369	2.82619	0.00471053	0.0286482
YFL064C	231.056	0.342941	0.22589	1.51818	0.12897	0.332765
YNL191W	641.319	0.448523	0.121372	3.69544	0.000219506	0.00220377
YDR237W	895.512	-0.132634	0.0853266	-1.55443	0.120082	0.317659
YJL110C	986.194	0.0677779	0.10918	0.620789	0.534739	0.75395
YKR048C	2754.56	0.0584053	0.0758214	0.770301	0.441121	0.685937
YBR001C	599.287	-0.0250774	0.132745	-0.188914	0.85016	0.938932
YPL003W	161.109	-0.321735	0.145421	-2.21244	0.0269365	0.114268
YKL108W	386.958	-0.0284256	0.124309	-0.228668	0.819127	0.921285
YGR110W	272.484	-0.541262	0.159482	-3.39387	0.000689126	0.00586164
YJR074W	602.331	-0.671748	0.131704	-5.10044	3.38859e-07	6.82574e-06
YPR127W	983.419	0.522914	0.12159	4.30062	1.70319e-05	0.0002249
YIR028W	37.986	-0.0745264	0.257819	-0.289065	0.772532	0.899268
YAL012W	3354.07	-0.000753256	0.140953	-0.00534401	0.995736	0.99842
YMR288W	664.718	-0.027638	0.0904432	-0.305584	0.759922	0.894028
YIL156W	513.25	-0.195753	0.114439	-1.71054	0.0871667	0.256133
YBR241C	454.802	0.317347	0.179744	1.76554	0.0774725	0.236493
YHR063W-A	1.5624	0.504437	1.30354	0.386976	0.698774	0.859243
YJL212C	88.8715	0.503473	0.270308	1.86259	0.06252	0.207362
YPL156C	262.848	-0.500074	0.160479	-3.11613	0.00183243	0.0134926
YNL312W	883.907	0.0284018	0.0967327	0.293611	0.769055	0.896806
YLR187W	409.869	-0.0626539	0.115244	-0.543665	0.586672	0.789511
YDR099W	3264.74	-0.115922	0.0932266	-1.24344	0.213705	0.453129
YKL133C	424.212	0.530055	0.143615	3.69081	0.000223544	0.00223015
YLR400W	2.5564	0.216029	0.936553	0.230664	0.817576	0.920792
YHR170W	4088.54	0.247315	0.133447	1.85328	0.0638417	0.210388
YDR259C	309.495	0.91451	0.154812	5.90721	3.47943e-09	9.6949e-08
YKL068W	1728.23	0.0411167	0.0797613	0.515497	0.606206	0.801913
YOR032C	262.566	1.49897	0.19924	7.52344	5.33534e-14	2.44537e-12
YKL093W	1098.38	0.124536	0.109953	1.13263	0.257371	0.512622
YMR002W	2255.47	0.0637254	0.128755	0.494937	0.620645	0.810568
YLR145W	254.161	0.167578	0.136929	1.22384	0.221014	0.462886
YLR261C	146.308	-0.451625	0.159498	-2.83153	0.00463256	0.0282283
YDL246C	144.248	-0.331811	0.193853	-1.71167	0.0869579	0.255818
YER081W	771.506	0.327521	0.114647	2.85677	0.00427978	0.0266959
YPL178W	730.622	-0.0145359	0.099587	-0.145962	0.883952	0.95377
YPR202W	198.836	-0.208588	0.313136	-0.666126	0.505331	0.733527
YIL096C	766.873	0.447344	0.146409	3.05545	0.00224723	0.0159526
YFR011C	848.64	-0.97289	0.106166	-9.16383	5.0087e-20	3.3e-18
YIL074C	1037.39	-0.209923	0.0960728	-2.18504	0.028886	0.1202
YGL173C	2624.76	-0.18791	0.0818791	-2.29497	0.0217348	0.0974575
YHL008C	955.867	0.234126	0.111348	2.10264	0.0354974	0.140326
YLR457C	328.447	-0.00185444	0.113637	-0.016319	0.98698	0.99548
YNL249C	329.927	-0.175672	0.184657	-0.951346	0.341429	0.600205
YGR056W	966.011	-0.075941	0.0826126	-0.919241	0.357969	0.614258
YGL065C	353.147	-0.369639	0.143173	-2.58176	0.00982973	0.0519841
YOR052C	1821.98	0.618122	0.141661	4.3634	1.28057e-05	0.000176462
YGR116W	1947.73	-0.157712	0.106226	-1.48468	0.137629	0.346954
YOR343C	80.7329	-0.967328	0.216249	-4.4732	7.70561e-06	0.000112819
YGL230C	21.6613	-0.599752	0.365916	-1.63904	0.101204	0.284876
YOL159C	274.982	0.391073	0.203137	1.92517	0.0542081	0.188388
YBR185C	571.553	-0.173475	0.144321	-1.20201	0.22936	0.473313
YOR010C	98.8051	0.385186	0.166613	2.31186	0.0207853	0.0939721
YDR019C	290.987	-0.0996721	0.278299	-0.358147	0.720233	0.872019
YBR150C	428.888	-0.0163667	0.132131	-0.123867	0.901421	0.960644
YIR042C	110.399	0.703568	0.238857	2.94556	0.00322372	0.0214632
YER119C	408.492	-0.0168402	0.172754	-0.0974809	0.922344	0.968282
YMR196W	930.644	0.477306	0.208882	2.28505	0.02231	0.0995141
YMR161W	431.826	-0.0583656	0.101081	-0.577414	0.56366	0.774778
YDR499W	425.949	-0.063761	0.115932	-0.549988	0.582328	0.786006
YKL068W-A	474.299	0.249893	0.145933	1.71238	0.0868275	0.255672
YJL133C-A	138.374	-0.00491991	0.289412	-0.0169997	0.986437	0.99548
YDL215C	4226.24	-0.140342	0.1468	-0.956008	0.339068	0.597804
YJR120W	73.3761	-1.37374	0.238628	-5.75683	8.57077e-09	2.20366e-07
YLL061W	497.422	-0.370052	0.121014	-3.05793	0.00222872	0.0158389
YDR110W	821.714	0.0406229	0.125672	0.323245	0.74651	0.886034
YDR419W	396.385	0.160625	0.12142	1.32289	0.185871	0.417337
YOR221C	741.041	0.31308	0.100982	3.10034	0.00193297	0.0140853
YPL214C	707.404	0.251849	0.100507	2.5058	0.0122175	0.0621186
YBL108C-A	16.9965	-0.205572	0.386727	-0.531567	0.595026	0.794666
YGL165C	3.83276	-0.519994	0.830768	-0.62592	0.531368	0.751543
YOL064C	600.802	0.10108	0.0903967	1.11818	0.26349	0.517946
YBL023C	886.432	0.0755788	0.109154	0.692406	0.488682	0.721502
YOR274W	577.277	-0.364421	0.0899682	-4.05055	5.1097e-05	0.000598497
YOR329C	1282.89	0.104402	0.116564	0.895664	0.370432	0.624686
YLR005W	804.673	-0.0189897	0.0937932	-0.202464	0.839554	0.934004
YDR124W	60.5804	-0.965554	0.215136	-4.48812	7.18558e-06	0.000105941
YNL267W	1017.85	-0.184427	0.0774733	-2.38052	0.0172881	0.0817246
YLR050C	349.389	-0.344209	0.145021	-2.37351	0.0176197	0.0829202
YOR124C	896.709	-0.010998	0.160859	-0.0683707	0.945491	0.978761
YDR067C	316.273	-0.000372464	0.168347	-0.00221248	0.998235	0.999499
YMR056C	415.843	0.117636	0.117564	1.00062	0.317011	0.576674
YHR032W-A	87.103	0.313327	0.201284	1.55664	0.119556	0.316942
YJL044C	830.042	0.10157	0.10889	0.932773	0.350937	0.60899
YPR164W	789.225	-0.0453727	0.13784	-0.329171	0.742027	0.882535
YEL060C	3697.48	0.12547	0.171631	0.731049	0.46475	0.702567
YHR195W	574.254	0.220541	0.105963	2.0813	0.037406	0.145738
YLR101C	13.522	-0.178602	0.421423	-0.423808	0.671706	0.84213
YBL107W-A	8.57293	-1.40838	0.602744	-2.33661	0.0194594	0.0895782
YML026C	7639.74	-0.237033	0.130609	-1.81483	0.0695503	0.22023
YPR066W	106.831	0.265083	0.162815	1.62813	0.103497	0.289271
YDR073W	517.614	0.102743	0.116031	0.885478	0.375899	0.628775
YDR229W	556.931	0.0637059	0.104184	0.611478	0.540883	0.758016
YDL181W	975.302	-1.79899	0.1056	-17.0359	4.44492e-65	1.65377e-62
YBR022W	305.907	0.245886	0.126187	1.94859	0.0513448	0.181124
YER177W	10043.6	0.0138742	0.13765	0.100793	0.919715	0.967218
YML048W	2607.52	-0.123576	0.0913119	-1.35333	0.175949	0.404095
YBL064C	3071.33	0.16047	0.119743	1.34012	0.180206	0.408903
YIL045W	109.338	0.125639	0.181243	0.693211	0.488177	0.721258
YKL221W	34.7314	0.250674	0.29583	0.847356	0.396797	0.645675
YGL126W	1291.16	-0.519199	0.166074	-3.12631	0.00177012	0.0130794
YLR167W	19593.7	-0.206428	0.139469	-1.48011	0.138845	0.348853
YMR270C	558.565	-0.0302764	0.0927774	-0.326334	0.744172	0.883922
YLR293C	6733.8	0.0736911	0.138565	0.531815	0.594854	0.794604
YLR228C	409.17	-0.457706	0.101457	-4.51134	6.44188e-06	9.58704e-05
YJR053W	200.804	-0.0827298	0.122435	-0.675705	0.499228	0.729916
YJL171C	1803.92	0.243218	0.138544	1.75553	0.0791692	0.240388
YDR374C	20.3477	1.17777	0.383562	3.07062	0.00213617	0.0152843
YKL021C	919.671	0.0179862	0.0860702	0.208971	0.834471	0.930705
YDL167C	1549.93	0.0792051	0.0837075	0.946213	0.34404	0.602952
YLR388W	2877.97	-0.32831	0.130612	-2.51363	0.0119495	0.0610015
YLR373C	526.361	-0.369763	0.150522	-2.45653	0.0140287	0.0691624
YKR001C	1787.84	-0.300809	0.093848	-3.20528	0.0013493	0.0104587
YKR054C	541.267	-0.191164	0.110601	-1.72842	0.0839134	0.249883
YIR034C	552.846	0.216328	0.149675	1.44533	0.148366	0.363728
YGL013C	1136.96	0.341885	0.114857	2.97662	0.0029144	0.0197573
YJR068W	794.341	-0.0473103	0.100808	-0.469309	0.638849	0.823796
YGR207C	953.956	-0.10435	0.0875283	-1.19219	0.233188	0.477937
YDR212W	2044.3	-0.118969	0.0718211	-1.65647	0.0976267	0.277523
YNL052W	2370.73	-2.41584	0.126401	-19.1124	1.98922e-81	1.39798e-78
YGL188C	257.836	-1.86098	0.16157	-11.518	1.0701e-30	1.09168e-28
YNL025C	211.703	0.283841	0.127379	2.22831	0.0258596	0.111191
YGR121W-A	5.68289	-0.213904	0.705193	-0.303326	0.761641	0.894426
YGR091W	322.729	0.0808294	0.104551	0.773106	0.439459	0.685132
YDL232W	145.013	-0.0522348	0.187166	-0.279082	0.780182	0.901037
YPL119C	305.603	0.445281	0.170303	2.61464	0.0089321	0.0483281
YLR242C	105.173	-0.300369	0.180759	-1.66171	0.0965709	0.275637
YJR148W	1530.64	0.180345	0.117606	1.53347	0.125159	0.326581
YJR082C	532.434	0.214367	0.134228	1.59704	0.110257	0.301113
YOL087C	1289.36	-0.0455669	0.106479	-0.427944	0.668692	0.840944
YNL134C	3553.71	0.67048	0.132124	5.07464	3.88237e-07	7.6978e-06
YAL037W	95.0338	-0.307154	0.201888	-1.52141	0.128157	0.331918
YGL146C	524.43	-0.369651	0.122829	-3.00948	0.00261696	0.0181693
YBR262C	619.442	0.0476861	0.124914	0.381753	0.702645	0.861285
YPL199C	571.248	-0.0440279	0.132509	-0.332263	0.739691	0.882148
YML101C-A	4.11022	-0.432307	0.853817	-0.506323	0.61263	0.807099
YFL036W	2481.28	0.158521	0.124267	1.27565	0.20208	0.438776
YDL209C	374.419	0.178485	0.118349	1.50813	0.131522	0.33775
YIL051C	2450.8	0.0113856	0.0880843	0.129258	0.897153	0.959502
YPL057C	3549.9	0.14429	0.0909285	1.58685	0.112547	0.304972
YNR010W	160.602	-0.0266607	0.156754	-0.17008	0.864947	0.9448
YDR365C	2381.75	0.122386	0.116133	1.05385	0.291954	0.550897
YLR308W	7.37262	1.21847	0.603034	2.02056	0.0433254	0.161687
YNL169C	623.18	-1.63488	0.0928082	-17.6157	1.86711e-69	9.08421e-67
YFR034C	561.966	0.13452	0.128761	1.04472	0.296152	0.555176
YHR070W	1243.04	0.431779	0.148957	2.89868	0.00374739	0.0241044
YDR460W	459.127	0.0403011	0.0995555	0.40481	0.685617	0.850299
YNL112W	13861.8	-0.0463135	0.347835	-0.133148	0.894077	0.959224
YHL047C	428.486	0.218643	0.121082	1.80575	0.0709578	0.222816
YOR360C	3896.29	0.667644	0.169916	3.92927	8.52033e-05	0.00095046
YOR335C	6146.86	0.0576834	0.104057	0.554347	0.579341	0.783982
YGL251C	285.271	0.135737	0.130396	1.04096	0.297896	0.557123
YER156C	1636.64	-0.454798	0.113728	-3.99901	6.36082e-05	0.000731494
YPL255W	314.388	-0.150522	0.158881	-0.947387	0.343442	0.602571
YOR095C	1400.61	-0.326432	0.12099	-2.698	0.00697576	0.0393592
YEL038W	843.98	0.496864	0.149939	3.31377	0.000920462	0.00757077
YCL014W	789.352	-0.0195112	0.0931891	-0.209372	0.834158	0.930684
YOL025W	400.614	0.0881536	0.133614	0.659762	0.509407	0.73493
YPL208W	469.671	-0.0837281	0.104702	-0.799681	0.423896	0.669762
YOL147C	717.734	0.0390358	0.128506	0.303766	0.761306	0.894426
YNL280C	773.984	0.122405	0.108895	1.12406	0.260988	0.515334
YDR007W	3614.75	2.69507	0.111164	24.244	7.64204e-130	2.41679e-126
YIL160C	220.623	0.213367	0.137061	1.55673	0.119535	0.316942
YPR089W	943.716	-0.117347	0.138705	-0.84602	0.397541	0.646055
YBR233W	494.309	-0.478806	0.106872	-4.48019	7.45765e-06	0.000109697
YPL122C	396.768	-0.145385	0.146624	-0.991551	0.321417	0.580083
YKL104C	7058.2	-0.294124	0.114147	-2.57671	0.00997457	0.0526182
YMR313C	626.723	0.170493	0.119847	1.42259	0.154855	0.372701
YGL179C	537.2	-0.610574	0.171697	-3.5561	0.000376396	0.00350104
YGR120C	235.128	-0.179324	0.138395	-1.29574	0.195065	0.429293
YML001W	654.287	-0.272156	0.0876866	-3.10373	0.00191096	0.0139571
YLL028W	1506.48	0.744012	0.157138	4.73478	2.19291e-06	3.64046e-05
YER016W	374.494	-0.381557	0.123966	-3.07792	0.00208453	0.0149996
YHR061C	289.039	-0.297041	0.165804	-1.79152	0.0732103	0.227211
YDR438W	216.015	0.122509	0.139105	0.880693	0.378484	0.630973
YNL211C	78.2984	-0.332978	0.313765	-1.06123	0.288584	0.547806
YLR124W	2.45071	-0.335324	1.0136	-0.330824	0.740778	0.882225
YML058W-A	58.1693	-0.71637	0.379786	-1.88624	0.059262	0.199804
YLR026C	587.051	0.20131	0.0897845	2.24215	0.0249517	0.108278
YJR065C	2033.79	-0.0103358	0.0972712	-0.106257	0.915378	0.966179
YDL131W	2337.35	-0.166409	0.116769	-1.42512	0.154124	0.371531
YMR095C	22.5108	0.96468	0.353822	2.72646	0.00640181	0.0367226
YER138C	11458.5	0.00510169	0.0978746	0.0521247	0.958429	0.984014
YDL033C	328.488	0.182104	0.173811	1.04771	0.294771	0.55423
YMR255W	451.466	0.0642422	0.104288	0.616008	0.537889	0.756338
YHR209W	1129.11	0.480123	0.130469	3.67997	0.000233264	0.00230744
YGL247W	165.098	-0.261139	0.137432	-1.90013	0.0574159	0.195982
YCR100C	32.1251	-0.356289	0.331181	-1.07581	0.28201	0.540848
YDR516C	1526.02	0.00147112	0.1533	0.00959631	0.992343	0.996596
Q0130	3.67603	-1.15311	0.837765	-1.37641	0.168693	0.394449
YPL233W	329.56	0.082462	0.122983	0.670515	0.50253	0.731822
YOR255W	5.22973	0.354811	0.733492	0.483728	0.628579	0.816106
YOR063W	36835.3	-0.0150533	0.127328	-0.118224	0.90589	0.962337
YGR251W	374.831	0.0756076	0.139483	0.542055	0.587781	0.790162
YPR047W	417.884	0.152176	0.134681	1.1299	0.25852	0.513396
YDR246W-A	7.43924	-0.258296	0.60299	-0.428358	0.668391	0.840944
YDR044W	736.989	-0.215462	0.174311	-1.23608	0.216431	0.45707
YEL016C	484.07	0.212269	0.105816	2.00602	0.0448539	0.165135
YAL027W	172.154	-0.0265062	0.151804	-0.174608	0.861388	0.944309
YKL153W	18.5535	0.0929694	0.531504	0.174918	0.861144	0.944303
YFL019C	14.6644	0.551654	0.528632	1.04355	0.296694	0.555556
YMR139W	361.46	-0.237822	0.144782	-1.64262	0.100461	0.283415
YDL080C	575.238	0.0137076	0.140411	0.0976247	0.92223	0.968282
YOR172W	537.723	-0.317279	0.134776	-2.35412	0.0185666	0.0861585
YOR105W	168.728	0.261447	0.177591	1.47219	0.14097	0.352147
YJL138C	10045.5	0.0842113	0.126477	0.665822	0.505525	0.733527
YPR143W	1064.87	0.113422	0.133995	0.846463	0.397294	0.645987
YDR340W	114.369	-0.162415	0.346744	-0.468399	0.639499	0.823839
YNL322C	2115.25	0.0432873	0.113929	0.379951	0.703982	0.861921
YPL090C	11493.2	-0.271265	0.131904	-2.05653	0.0397314	0.151849
YPR078C	86.7877	0.621812	0.315194	1.97279	0.048519	0.174052
YCR075C	99.3954	-0.0160928	0.196341	-0.0819636	0.934676	0.97298
YFL062W	15.6145	1.11392	0.47785	2.33111	0.0197475	0.0904938
YDR171W	1217.84	1.22712	0.245257	5.00341	5.63264e-07	1.06986e-05
YLR439W	1148.33	-0.147115	0.118608	-1.24035	0.214847	0.454923
YCR020C	140.986	0.0189449	0.166763	0.113604	0.909552	0.964008
YDR450W	8154.94	-0.276562	0.131685	-2.10018	0.0357126	0.140912
YCL051W	455.277	0.0350323	0.0960843	0.3646	0.71541	0.869268
YCR097W	401.363	-0.308694	0.148101	-2.08434	0.037129	0.145232
YBL039C-A	10.4776	0.0817892	0.677566	0.12071	0.903921	0.961547
YDR235W	282.009	-0.0497106	0.230361	-0.215795	0.829148	0.927221
YGL194C-A	77.6846	-0.355498	0.281857	-1.26127	0.207211	0.44411
YER038C	237.654	0.217798	0.136929	1.59059	0.111701	0.303392
YPR125W	2066.99	0.0147126	0.128161	0.114797	0.908606	0.963604
YHR049W	4206.36	0.390188	0.13372	2.91795	0.00352346	0.0230464
YBR007C	729.176	0.0704682	0.0919647	0.766253	0.443526	0.687821
YPL001W	405.468	0.0361822	0.157152	0.230238	0.817907	0.920837
YJL038C	23.3996	0.443226	0.344626	1.28611	0.198406	0.433647
YNL319W	1.92453	-0.475086	1.06453	-0.446287	0.65539	0.834577
YPR178W	411.944	0.139747	0.100183	1.39492	0.163039	0.38608
YDR475C	618.636	0.11527	0.120558	0.956134	0.339005	0.597804
TLC1	992.542	-0.706975	0.145752	-4.85054	1.23127e-06	2.15132e-05
YNL159C	190.933	-0.0423069	0.159363	-0.265476	0.790643	0.906273
YAL014C	497.464	-0.0048639	0.10978	-0.0443058	0.964661	0.987338
YCR020W-B	135.015	-0.254201	0.223789	-1.1359	0.256	0.511668
YBR243C	482.961	-0.599467	0.127782	-4.69132	2.7145e-06	4.3911e-05
YLR181C	446.043	-0.0899493	0.105356	-0.853768	0.393233	0.643519
YBL056W	1414.25	-0.142584	0.079674	-1.78959	0.0735191	0.227655
YNL075W	1246.86	0.0459581	0.11339	0.405311	0.685249	0.850262
YPL150W	742.594	-0.111064	0.0900912	-1.23279	0.217653	0.45813
YJL012C	1358.02	-0.156496	0.0836098	-1.87174	0.0612428	0.204412
YJL065C	394.345	0.0633489	0.155312	0.407881	0.683361	0.849189
YKR020W	196.047	-0.0772722	0.15889	-0.486325	0.626737	0.81499
YMR053C	140.72	0.157764	0.210336	0.750057	0.453221	0.694216
YKL066W	345.316	-0.859127	0.170878	-5.02773	4.96326e-07	9.57091e-06
YMR004W	463.131	-0.0681407	0.125611	-0.542473	0.587493	0.789943
YER083C	807.042	0.0292094	0.110267	0.264898	0.791088	0.906455
YPL176C	924.759	0.0455283	0.110709	0.411244	0.680893	0.847103
YHR172W	314.246	-0.133178	0.178449	-0.746312	0.455479	0.696712
YLR263W	860.659	-0.0979286	0.0949329	-1.03156	0.30228	0.561669
YDL240W	533.329	-0.375307	0.15137	-2.4794	0.0131603	0.06577
YDR401W	11.6521	0.663369	0.567203	1.16954	0.242185	0.490968
YGL118C	1.9281	-0.388958	1.10087	-0.35332	0.723849	0.873167
YHR013C	635.26	-0.196735	0.105408	-1.86641	0.0619838	0.206051
YOL040C	11187	-0.223479	0.148034	-1.50965	0.131133	0.337023
YGR072W	530.918	0.139906	0.101596	1.37707	0.168489	0.394263
YCL035C	1949.66	0.411697	0.145305	2.83332	0.00460669	0.0280977
YIL023C	2837.09	0.398877	0.117767	3.38699	0.000706639	0.00598772
YNR073C	298.706	-0.538518	0.269902	-1.99524	0.0460171	0.168104
YPR200C	60.4202	0.174158	0.209806	0.830089	0.406489	0.654843
YIL072W	245.684	-0.21322	0.213349	-0.999396	0.317603	0.576933
YLR327C	2237.24	0.185269	0.358977	0.516103	0.605782	0.801913
YBR229C	834.496	-0.116971	0.126198	-0.926886	0.353986	0.612574
YML133C	68.5554	-0.730941	0.736985	-0.991799	0.321296	0.580083
YOR131C	394.074	0.0975295	0.130166	0.749273	0.453693	0.694652
YLR455W	452.289	0.0914006	0.113237	0.807161	0.419574	0.666564
YNL247W	2569.16	-0.175536	0.0825525	-2.12635	0.0334739	0.134257
YOR054C	490.895	-0.0230341	0.169893	-0.13558	0.892153	0.958169
YGL007C-A	7.94939	-0.900331	0.691849	-1.30134	0.193142	0.427142
YFR028C	834.701	-0.0855491	0.08372	-1.02185	0.306853	0.565826
YGR290W	2.1744	-0.335564	1.12668	-0.297835	0.765829	0.896183
YOR009W	240.072	-0.284132	0.171185	-1.65979	0.096957	0.276116
YOR072W	4.62065	-0.0239231	0.74778	-0.0319921	0.974478	0.990901
YDR292C	1084.62	-0.126532	0.0825326	-1.53312	0.125246	0.326672
YOR161C-C	3.97227	0.599569	0.777304	0.771345	0.440503	0.685937
YHR126C	157.989	1.68511	0.75513	2.23155	0.0256448	0.110417
YMR194W	2677.06	-0.087006	0.155396	-0.5599	0.575548	0.782361
YAL016C-A	1.74166	1.33484	1.31506	1.01504	0.310086	0.569812
YMR167W	463.336	0.0174357	0.104074	0.167532	0.866952	0.945589
YOR249C	311.902	0.0457598	0.245992	0.186021	0.852428	0.940155
YER117W	7389.33	-0.251499	0.144254	-1.74344	0.0812559	0.244619
YOR301W	243.965	-0.234354	0.158349	-1.47998	0.138879	0.348853
YPL187W	81.2817	0.567947	0.189044	3.00432	0.00266178	0.0184199
YKL218C	248.93	0.102799	0.113936	0.902247	0.366926	0.621352
YOR140W	1026.81	0.02653	0.0940998	0.281935	0.777994	0.900426
YDR391C	465.881	0.512549	0.128563	3.98675	6.69851e-05	0.00076615
YLL063C	152.558	0.156521	0.15306	1.02261	0.306491	0.56567
YOR276W	1226.97	-0.283648	0.101333	-2.79918	0.00512332	0.0307156
YMR309C	5069.2	-0.0792267	0.159025	-0.498202	0.618342	0.810236
YOR089C	1076.97	0.18736	0.0895671	2.09184	0.036453	0.143297
tD(GUC)N	6.66147	-0.860151	0.633832	-1.35706	0.174761	0.403032
YGR258C	1696.2	0.346374	0.108586	3.18985	0.00142347	0.0109133
YNL146C-A	31.9252	0.159763	0.310193	0.515045	0.606522	0.801913
YMR180C	565.564	0.0660488	0.120228	0.549361	0.582758	0.786419
YGL163C	880.194	0.34953	0.0946199	3.69405	0.000220715	0.00220975
YDR417C	4.98844	0.0731226	0.883352	0.0827785	0.934028	0.972979
YOL131W	3.95995	0.791724	0.786717	1.00636	0.31424	0.573822
YPL283C	1593.47	0.035066	0.126053	0.278185	0.78087	0.901057
YBL021C	226.7	-0.663868	0.158436	-4.19014	2.78778e-05	0.000345739
YHR215W	217.205	-0.0463169	0.179462	-0.258087	0.79634	0.909507
YLL045C	13266.9	-0.248338	0.149381	-1.66245	0.0964227	0.275448
YLR007W	1409.43	0.491903	0.136283	3.60942	0.00030688	0.00290571
YNL261W	409.772	0.420143	0.118379	3.54914	0.000386484	0.00357908
YNL305C	582.301	0.425197	0.152703	2.78447	0.0053615	0.0319317
YJL046W	363.812	0.161469	0.13433	1.20203	0.229351	0.473313
YKR078W	301.087	-0.0433414	0.153407	-0.282526	0.77754	0.900426
YOR191W	1063.99	-0.125592	0.101792	-1.23381	0.217272	0.458017
YEL074W	24.1635	-0.317537	0.308875	-1.02804	0.30393	0.56295
YDR272W	940.719	0.143618	0.0915245	1.56917	0.116607	0.312505
YGR289C	573.938	0.248951	0.103336	2.40915	0.0159899	0.0767929
YML020W	536.392	-0.0790367	0.109034	-0.724881	0.468525	0.706178
YLR103C	573.679	-0.274321	0.138283	-1.98376	0.0472828	0.171089
YOR294W	1582.22	0.113692	0.148162	0.767349	0.442874	0.687405
YEL062W	378.076	0.278005	0.131802	2.10926	0.0349225	0.138747
YPR064W	2.97256	0.608348	0.871096	0.69837	0.484946	0.718165
YPR031W	539.224	0.0855822	0.0875011	0.97807	0.32804	0.586282
YLR038C	1738.57	-1.49673	0.131728	-11.3623	6.44235e-30	6.2689e-28
YNL096C	4880.95	-0.13848	0.116697	-1.18666	0.235361	0.4813
YDR038C	1255.5	-0.00885642	0.0970173	-0.0912871	0.927265	0.970215
YDL187C	26.6319	1.30821	0.336999	3.88193	0.000103632	0.00113797
YBR024W	406.434	0.259915	0.102551	2.53448	0.0112613	0.058122
YER171W	824.105	-0.00177894	0.101355	-0.0175516	0.985997	0.99548
YDL047W	1548.53	0.0696806	0.110024	0.633323	0.526523	0.747281
YML046W	473.479	-0.104433	0.176096	-0.593045	0.553151	0.766246
YGL124C	443.229	0.158269	0.129669	1.22056	0.222254	0.463945
YMR276W	1833.53	-0.0086101	0.111238	-0.0774025	0.938303	0.97467
YEL059W	15.403	-0.599672	0.441009	-1.35977	0.173902	0.401904
YDL160C-A	88.689	-0.0938452	0.187359	-0.500885	0.616452	0.809217
YLR165C	235.025	0.0848764	0.126141	0.672872	0.501029	0.730691
YCR069W	1115.67	0.118424	0.0958292	1.23578	0.21654	0.457149
YGR146C-A	4.02141	-0.76697	0.86233	-0.889416	0.37378	0.627475
YKL027W	1422.91	0.0108646	0.138473	0.07846	0.937462	0.974437
YJL173C	579.093	-0.213738	0.113154	-1.8889	0.0589049	0.198812
YDR152W	1285.22	0.0703549	0.114765	0.613035	0.539853	0.757447
YKL127W	639.506	-0.896291	0.124647	-7.19064	6.44879e-13	2.66592e-11
YDR309C	2061.22	0.22941	0.159229	1.44076	0.149653	0.365607
YLR386W	623.01	-0.213238	0.121075	-1.76121	0.0782029	0.238263
YLR371W	1133.13	-0.0836962	0.131465	-0.636645	0.524356	0.745796
YDL169C	181.065	0.629395	0.1481	4.24981	2.13953e-05	0.000276175
YLR092W	203.394	-0.481319	0.156944	-3.06681	0.00216355	0.0154278
YER044C	1229.58	0.128675	0.101244	1.27093	0.203753	0.440595
YMR072W	1530.1	-0.112569	0.105872	-1.06326	0.287663	0.547044
YJR033C	620.42	-0.00446197	0.138757	-0.0321567	0.974347	0.990901
YKR056W	2354.25	0.101192	0.102681	0.985503	0.324377	0.583362
YGL011C	1635.22	0.0876988	0.104119	0.842293	0.399624	0.648441
YIR036C	624.102	0.145604	0.136622	1.06574	0.28654	0.545401
YMR123W	499.272	-0.267426	0.156096	-1.71322	0.0866729	0.255574
YDR406W	2520.86	1.85051	0.135316	13.6755	1.42217e-42	2.24881e-40
YGR073C	41.0449	0.171642	0.259199	0.662202	0.507842	0.73493
YGR209C	1768.35	0.464844	0.163982	2.83472	0.00458653	0.0280017
YJL150W	2.28768	1.14439	1.03955	1.10085	0.270963	0.52766
tS(UGA)E	2.37304	0.247209	0.96967	0.254942	0.798768	0.910144
YNL050C	773.723	0.149573	0.10021	1.49259	0.135544	0.343201
YMR304C-A	560.029	-0.0881599	0.157889	-0.558366	0.576595	0.78261
YLR240W	436.919	0.0628316	0.134473	0.467244	0.640326	0.824476
YGR093W	854.949	0.0832822	0.114072	0.730082	0.46534	0.703123
YDL234C	1233.47	0.243467	0.117832	2.06622	0.0388074	0.149578
YPR108W-A	1.17949	-0.475274	1.53885	-0.30885	0.757436	0.892304
YNL136W	573.193	0.20716	0.127963	1.6189	0.105468	0.292839
YKL049C	384.305	0.295542	0.103961	2.84283	0.00447145	0.0275273
YJR080C	945.185	-0.814368	0.0853982	-9.53613	1.48255e-21	1.07783e-19
YNR038W	1103.59	0.0295232	0.10964	0.269273	0.78772	0.90407
YGL140C	898.021	-0.0981951	0.111214	-0.88294	0.377269	0.629943
YCL029C	574.87	-0.0792419	0.116463	-0.680406	0.496248	0.72724
YFL038C	3363.26	-0.0311725	0.0999744	-0.311805	0.755189	0.891062
YJR131W	432.458	0.0814962	0.114804	0.709873	0.477783	0.71273
YNR012W	904.896	0.11197	0.0887879	1.26109	0.207275	0.44411
YNL110C	2172.21	0.139936	0.133843	1.04552	0.295784	0.554814
YDR367W	299.124	-0.419686	0.190787	-2.19977	0.0278236	0.116952
YIL053W	17715.2	0.792258	0.223027	3.5523	0.000381882	0.00354165
YPL059W	736.764	0.146851	0.105936	1.38623	0.165676	0.390426
YGL253W	16523.2	-0.324611	0.15142	-2.14377	0.032051	0.130201
YHL032C	2690.22	-0.580757	0.114237	-5.0838	3.69955e-07	7.42846e-06
YJL010C	1067.14	0.00820925	0.0991859	0.0827663	0.934037	0.972979
YHL045W	1.88381	1.11631	1.19415	0.934821	0.34988	0.608742
YOR337W	1681.72	0.234357	0.0971675	2.41189	0.0158702	0.0763921
YMR010W	1313.32	0.0689691	0.150208	0.459158	0.646121	0.827484
YOR097C	198.833	0.179986	0.146455	1.22895	0.21909	0.460533
YHR118C	323.385	0.179237	0.138056	1.29829	0.194188	0.428256
YGR024C	604.869	0.178357	0.163007	1.09416	0.273883	0.531384
YOL023W	644.814	0.116919	0.12573	0.929924	0.35241	0.61083
YPL253C	219.411	0.0440726	0.170329	0.25875	0.795828	0.909246
YER154W	1456.37	-0.351258	0.126407	-2.77878	0.00545628	0.0324656
YEL036C	2689.48	0.127154	0.0998358	1.27363	0.202796	0.439426
YBR260C	540.274	-0.0144804	0.0947125	-0.152888	0.878487	0.950874
YPL124W	168.78	0.0317129	0.166249	0.190756	0.848717	0.938569
YAL042W	1906.65	-0.208965	0.102028	-2.04811	0.040549	0.153668
YAL035W	4597	-0.0166838	0.087997	-0.189595	0.849626	0.93867
YNL286W	349.055	0.0888495	0.144906	0.613152	0.539776	0.757447
YDR001C	3834.03	0.482932	0.0881309	5.47971	4.26015e-08	9.9798e-07
YIL162W	9759.18	0.187761	0.14174	1.32469	0.185274	0.416291
YOL141W	239.65	-0.0449785	0.155646	-0.288979	0.772597	0.899268
YHR145C	28.5845	-0.859903	1.13929	-0.754769	0.450387	0.6916
YBR195C	390.328	0.146819	0.102394	1.43386	0.151613	0.368403
YIL039W	1153.11	-0.277203	0.0977327	-2.83633	0.00456348	0.0279675
YGR122W	252.194	-0.362573	0.157029	-2.30896	0.0209459	0.0944954
YPL092W	313.499	-0.415786	0.129379	-3.2137	0.00131038	0.0102372
YGR161C-D	1257.7	-0.00801818	0.256663	-0.0312401	0.975078	0.990901
YMR315W	2051.51	-0.398177	0.157419	-2.5294	0.0114258	0.0587776
YGR213C	39.9898	0.751964	0.404619	1.85845	0.0631053	0.208765
YDR384C	1022.35	0.204209	0.126659	1.61228	0.106901	0.295134
YML007W	2224.58	0.325514	0.0700074	4.64971	3.32403e-06	5.22997e-05
YER063W	685.424	-0.14034	0.0954113	-1.47089	0.14132	0.352603
YDR481C	1429.13	0.0541832	0.0922911	0.58709	0.557143	0.769417
YER014W	570.9	0.360192	0.11285	3.19179	0.00141395	0.0108666
YPR041W	3779.47	0.0668612	0.11104	0.602134	0.547085	0.76178
YNL213C	608.982	0.0581498	0.0999457	0.581813	0.560692	0.772463
YKL006C-A	456.923	0.11202	0.136277	0.822006	0.411074	0.658572
YBR058C	1196.75	0.088922	0.0932631	0.953454	0.34036	0.598992
YLR024C	400.719	-0.0880024	0.109817	-0.801355	0.422926	0.669254
YLR071C	947.081	-0.133417	0.12603	-1.05861	0.289777	0.549083
YHR092C	4115.82	0.23185	0.346462	0.669193	0.503372	0.731958
YDL199C	156.3	0.0347492	0.188959	0.183898	0.854094	0.940648
YHL007C	2600.57	0.0309821	0.111478	0.277923	0.781072	0.901057
YER181C	2.22997	0.796804	1.13602	0.701398	0.483055	0.716371
YNL228W	5.34884	-0.197388	0.712557	-0.277013	0.78177	0.901193
YDL064W	486.062	-0.113235	0.100307	-1.12889	0.258946	0.513428
YDL031W	2385.62	0.0770069	0.104886	0.734198	0.462828	0.701682
YMR257C	489.431	-0.155461	0.231275	-0.672192	0.501462	0.731154
YDR046C	2060.43	0.288114	0.144221	1.99772	0.0457467	0.16735
YOR253W	437.577	0.0572428	0.12083	0.473748	0.63568	0.821384
YGL245W	4044.44	-0.26502	0.111828	-2.36989	0.0177932	0.0834262
YGR006W	142.964	0.224863	0.153013	1.46957	0.141679	0.353081
YGR079W	4502.01	0.419125	0.151934	2.7586	0.00580495	0.0339966
YDL119C	272.725	0.379195	0.112603	3.36755	0.000758384	0.0063787
YKL151C	859.685	0.331641	0.161724	2.05066	0.0402999	0.152999
YGL198W	520.452	0.0932384	0.11277	0.826799	0.408351	0.655908
YDL086W	1715.71	2.67369e-06	0.133517	2.00252e-05	0.999984	0.999984
YBL091C-A	188.383	0.241509	0.138583	1.7427	0.0813864	0.244895
YLR361C-A	223.707	0.271811	0.117601	2.3113	0.0208162	0.0939773
YHR038W	367.122	0.0777259	0.13828	0.56209	0.574055	0.781511
YML069W	1346.8	-0.170294	0.100677	-1.69149	0.0907435	0.264251
YKR019C	270.861	5.57794e-06	0.127657	4.36948e-05	0.999965	0.999984
YJR073C	2198.17	-1.90156	0.150601	-12.6265	1.50934e-36	1.98888e-34
YGR279C	6325.15	-0.143961	0.11389	-1.26403	0.20622	0.443006
YCR073C	1054.97	0.398086	0.115302	3.45255	0.000555308	0.00493998
YCR022C	4.02451	-0.578857	0.823979	-0.702515	0.482358	0.715719
YLL015W	1154.79	0.182996	0.108567	1.68555	0.091882	0.2667
YNL195C	122.576	1.41995	0.278216	5.10376	3.32971e-07	6.72857e-06
YDL134C	1601.65	-0.0155263	0.1015	-0.152968	0.878423	0.950874
YFL060C	241.475	-0.783009	0.177514	-4.41098	1.02903e-05	0.000145607
YDR173C	226.521	-0.280959	0.128129	-2.19278	0.028323	0.118638
YMR100W	669.381	0.0645362	0.126614	0.509709	0.610256	0.80481
YCL057W	1574.59	-0.333736	0.0895452	-3.72702	0.000193759	0.00196084
YBR072W	9329.52	2.03845	0.222498	9.16168	5.10974e-20	3.33187e-18
YBR005W	591.03	0.141416	0.147662	0.957705	0.338211	0.597314
YPR123C	17.3341	-0.446916	0.466591	-0.957833	0.338147	0.597314
RUF5-2	440.002	0.439475	0.190625	2.30544	0.0211418	0.0951758
YDL173W	799.515	-0.264912	0.105592	-2.50884	0.012113	0.0616865
YJR047C	45.5866	1.22698	0.329195	3.72722	0.000193606	0.00196084
YMR006C	1180.16	0.245967	0.172692	1.42432	0.154355	0.371781
YKL145W-A	16.9068	0.485522	0.398992	1.21687	0.223653	0.465666
YAL016W	1735.11	-0.0146766	0.0975187	-0.1505	0.88037	0.951629
YMR292W	223.598	-0.407306	0.202807	-2.00835	0.0446066	0.164511
YHR011W	329.1	0.00544563	0.121234	0.0449184	0.964172	0.987338
YPL152W	255.869	0.239819	0.134097	1.78841	0.0737106	0.228092
YLR183C	615.807	-0.469179	0.11984	-3.91506	9.03833e-05	0.00100118
YNL077W	457.626	0.0486066	0.116098	0.418668	0.675459	0.844324
YBR109C	1875.27	-0.0405303	0.0876958	-0.46217	0.64396	0.826678
YBR172C	3076.89	-0.174022	0.0837719	-2.07733	0.0377711	0.146296
YDR346C	2719.01	-0.094915	0.128964	-0.735982	0.461742	0.701119
YAR002C-A	2522.53	-0.623064	0.129549	-4.80949	1.51313e-06	2.58664e-05
YOL077W-A	1367.73	-1.07288	0.0958623	-11.1918	4.47052e-29	4.09798e-27
YPL029W	649.349	0.066262	0.0889953	0.744557	0.45654	0.697573
YHR146W	1133.37	-0.0242899	0.170963	-0.142076	0.88702	0.955938
YNL019C	2.4345	2.6683	3.36383	0.793234	0.427641	0.672677
YDL242W	9.12806	-0.929682	0.553878	-1.6785	0.0932502	0.269298
YBR189W	12992.4	-0.273059	0.145349	-1.87865	0.0602929	0.202296
YER085C	31.6544	0.242093	0.27316	0.886267	0.375474	0.628469
YJL225C	2090.59	-0.138702	0.0859685	-1.6134	0.106657	0.294715
YKL064W	1327.05	0.0100059	0.075219	0.133023	0.894175	0.959224
YLR265C	232.328	0.133685	0.186147	0.718168	0.472654	0.708925
YKR022C	480.417	0.121355	0.105985	1.14503	0.252198	0.505274
YLR287C	542.577	0.0827007	0.145643	0.56783	0.57015	0.778791
YPL174C	339.654	-0.0332235	0.18845	-0.176299	0.860059	0.944303
YOR070C	616.999	-0.100052	0.0919564	-1.08804	0.276579	0.533506
YDR403W	191.876	0.587633	0.137333	4.2789	1.87817e-05	0.000246461
YOL093W	588.366	-0.0295704	0.117298	-0.252096	0.800967	0.911126
YOL042W	401.744	-0.105325	0.115297	-0.913512	0.360973	0.616569
YIL070C	1619.62	0.204673	0.0747751	2.73719	0.00619671	0.035696
YCL037C	88.3216	-0.55341	0.300418	-1.84213	0.0654557	0.212967
YIL025C	7.28857	0.837245	0.726356	1.15266	0.249048	0.500231
YDR545C-A	19.079	-0.138385	0.483074	-0.286468	0.77452	0.899716
YNR071C	33.6707	-0.00876374	0.311784	-0.0281084	0.977576	0.992005
YML131W	858.407	0.483368	0.129242	3.74003	0.000183996	0.00188009
YNL245C	493.218	0.114231	0.159983	0.714018	0.475216	0.711325
YNR024W	403.275	0.0969471	0.133712	0.725043	0.468425	0.706178
YFL013W-A	2.3225	-0.925251	1.15949	-0.797983	0.42488	0.670171
YLR329W	28.8693	0.799044	0.306173	2.60978	0.00906	0.0489364
YPL043W	2803.71	0.0981334	0.132965	0.738038	0.460492	0.700652
YCL045C	2035.95	-0.0614093	0.0757589	-0.810589	0.417602	0.665155
YBR056C-B	2.07495	0.567153	1.15808	0.489736	0.624321	0.813491
YKL002W	789.36	0.167396	0.0824614	2.02999	0.0423571	0.158996
YDR328C	1140.69	0.147126	0.0941481	1.56271	0.118122	0.315108
YIR009W	123.635	0.392404	0.199447	1.96746	0.0491299	0.175464
YBR154C	1860.39	0.033361	0.0933047	0.357549	0.720681	0.87207
YLR001C	581.205	-0.0241163	0.145788	-0.165421	0.868613	0.946378
YKR101W	355.804	0.0635271	0.152412	0.416811	0.676817	0.844908
YMR230W-A	7.98785	-1.11228	0.650295	-1.71043	0.0871865	0.256133
YER115C	255.951	-0.129064	0.124429	-1.03724	0.299623	0.558103
YHR124W	102.285	-0.225538	0.180955	-1.24638	0.212626	0.451606
YER148W	1277.31	-0.0456475	0.0994626	-0.458942	0.646276	0.827484
YMR240C	372.812	-0.282485	0.110377	-2.55928	0.0104888	0.0547824
YOR303W	11942.2	0.859303	0.122431	7.01865	2.24014e-12	8.85557e-11
YIL087C	231.265	0.394628	0.19642	2.00911	0.0445258	0.164309
YMR192W	678.542	-0.0233075	0.138261	-0.168576	0.86613	0.945018
YJL221C	375.417	0.251497	0.138818	1.8117	0.0700323	0.22111
YMR229C	3766.81	-0.145561	0.129385	-1.12502	0.260579	0.515334
YLL038C	372.25	0.013956	0.12512	0.111541	0.911187	0.964097
YOR056C	2363.39	0.138229	0.133711	1.03379	0.301235	0.560056
YOL108C	175.937	-0.541985	0.184431	-2.9387	0.00329597	0.0218293
YOR270C	5304.22	0.0940213	0.0981935	0.95751	0.33831	0.597314
YDR106W	21.0744	-0.260681	0.352399	-0.739732	0.459463	0.699591
YOL068C	1307.15	0.0739196	0.0691291	1.0693	0.284935	0.544147
YMR182C	1204.94	0.92465	0.170775	5.41444	6.14816e-08	1.39882e-06
YBR201W	445.15	-0.725768	0.165673	-4.38073	1.1828e-05	0.00016588
YLL043W	1523.55	0.0144786	0.08336	0.173687	0.862111	0.944309
YDR415C	348.722	-0.0365506	0.100614	-0.363274	0.7164	0.869551
YGL161C	531.335	-0.166911	0.0971578	-1.71794	0.0858081	0.253497
YOL133W	270.794	0.387004	0.117237	3.30102	0.000963324	0.00784581
YDL074C	1136.5	0.00407757	0.123288	0.0330735	0.973616	0.990693
YNL263C	669.182	-0.196585	0.10637	-1.84812	0.0645853	0.211331
YHR217C	4.54334	0.375662	0.743088	0.505541	0.613179	0.807445
YDR128W	794.696	-0.143115	0.102321	-1.3987	0.161904	0.384112
YOR193W	199.811	-0.361657	0.187486	-1.92898	0.0537333	0.187666
YER028C	108.611	0.170583	0.169829	1.00443	0.315169	0.574221
YMR052W	136.153	0.215343	0.14507	1.48441	0.1377	0.346994
YMR294W-A	3.39125	0.030725	1.08339	0.0283601	0.977375	0.992005
YKR076W	600.191	0.479375	0.0948912	5.05184	4.37581e-07	8.516e-06
YDR225W	4535.75	-0.184017	0.165807	-1.10982	0.267075	0.522602
YDR270W	398.078	0.133781	0.170541	0.784454	0.432774	0.678222
YPR033C	3087.54	-0.0708909	0.0960971	-0.737701	0.460696	0.700777
YGR230W	266.362	0.159303	0.146684	1.08603	0.277466	0.534401
YPR062W	1273.22	0.0790936	0.146392	0.540285	0.589001	0.791466
YDR528W	602.058	-0.0534932	0.150828	-0.354662	0.722842	0.872682
YER173W	435.697	-0.119114	0.0994833	-1.19733	0.231178	0.475513
YBR026C	1275.77	0.19001	0.127592	1.4892	0.136435	0.344768
YDL185W	6384.59	0.220917	0.0871752	2.53418	0.0112712	0.058122
YBR091C	219.299	-0.333586	0.16116	-2.0699	0.0384614	0.148425
YNL094W	929.907	-0.0728065	0.0933963	-0.779544	0.435659	0.680886
YGL056C	3508.35	0.00246406	0.129611	0.0190112	0.984832	0.995466
YPL227C	638.307	-0.0516437	0.100524	-0.513744	0.607431	0.801913
YLR222C-A	37.3583	0.124461	0.356953	0.348676	0.727333	0.875478
YDL010W	394.6	0.0818063	0.113151	0.722981	0.469691	0.70666
YML019W	403.793	-0.261982	0.100715	-2.60123	0.00928903	0.0497908
YDL045C	535.785	0.0369249	0.105917	0.348622	0.727373	0.875478
YLR163C	956.954	-0.0369958	0.0805634	-0.459214	0.646081	0.827484
YLR178C	1116.28	0.876682	0.234457	3.7392	0.000184606	0.00188024
YBL079W	1334.45	-0.120214	0.136828	-0.878577	0.379631	0.631707
YNL056W	510.137	0.464223	0.147565	3.14589	0.00165584	0.0123359
YFL001W	652.241	0.276296	0.115407	2.3941	0.0166611	0.0792343
YDR150W	1579.05	-0.27731	0.094962	-2.92023	0.00349778	0.0229259
YER147C-A	7.48125	0.290309	0.638209	0.45488	0.649196	0.829697
YKL170W	566.719	0.00721378	0.103801	0.0694964	0.944595	0.978474
YPR157W	112.558	0.13811	0.260127	0.530933	0.595465	0.79475
YPR137C-B	611.108	1.24095	1.49622	0.829385	0.406887	0.655183
YLR384C	2396.16	-0.0209794	0.111384	-0.188352	0.8506	0.939254
YPL060W	239.155	0.122997	0.142252	0.864643	0.387235	0.638493
YML099C	785.076	0.0242271	0.106961	0.226504	0.820809	0.922009
YLR421C	728.479	0.0839618	0.0951853	0.882089	0.377729	0.630379
YLR090W	835.174	0.29905	0.111251	2.68806	0.0071869	0.0402471
YJR064W	2590.66	-0.15203	0.0690491	-2.20177	0.0276814	0.116582
YML022W	1614.76	0.00675073	0.136138	0.0495875	0.960451	0.985058
YER046W	201.827	-0.0275927	0.123424	-0.22356	0.8231	0.923542
YMR029C	481.625	-0.346254	0.115277	-3.00368	0.00266738	0.0184384
YIR030C	26.8492	-0.865894	0.339691	-2.54907	0.0108011	0.0562281
YKR050W	811.523	-0.2774	0.107273	-2.58591	0.0097122	0.0516803
YMR121C	525.346	0.14749	0.132429	1.11373	0.265397	0.520507
YGL017W	438.428	0.174029	0.101254	1.71874	0.0856617	0.253497
YDL150W	1257.64	0.0285951	0.115644	0.247269	0.8047	0.912375
YNL038W	293.38	-0.0198018	0.198725	-0.0996446	0.920627	0.967653
YHR001W-A	1058.24	-1.44428	0.169295	-8.53114	1.44909e-17	8.11106e-16
YOL165C	5.19002	1.24005	0.893782	1.38742	0.165314	0.390008
YIL139C	267.64	-0.136587	0.151591	-0.901022	0.367577	0.621804
YLR246W	439.774	0.157788	0.110564	1.42712	0.153545	0.371243
YJR119C	835.92	0.312764	0.130201	2.40216	0.0162986	0.0778278
YLR359W	1923.76	-0.180905	0.194665	-0.929314	0.352727	0.61083
YLR199C	813.146	-0.112494	0.109341	-1.02884	0.303555	0.56288
YJL206C	313.655	-0.0804478	0.125988	-0.638535	0.523126	0.744883
YIL142W	2882.52	-0.0837029	0.0798817	-1.04784	0.294714	0.55423
YGL082W	483.505	-0.0163263	0.10258	-0.159156	0.873546	0.947877
YNL138W	1403.46	-0.19014	0.135432	-1.40395	0.160334	0.381246
YOR133W	4603.9	-0.0506811	0.127889	-0.39629	0.691891	0.854602
21S_rRNA	71.0829	-0.524414	0.325649	-1.61036	0.107318	0.295819
YGL142C	404.854	0.182513	0.121473	1.50251	0.132967	0.340354
YGR179C	225.038	-0.00112829	0.147527	-0.00764808	0.993898	0.997525
YGR102C	507.73	0.164797	0.139165	1.18418	0.236342	0.482333
YBR139W	720.228	-0.0513003	0.185804	-0.276099	0.782472	0.901317
YHR188C	1639.02	-0.434513	0.0947502	-4.58588	4.52075e-06	6.94023e-05
YKL106C-A	3.2235	-1.92511	0.958069	-2.00936	0.0444989	0.164306
YNL116W	538.516	0.0431119	0.10093	0.427146	0.669273	0.840944
YNL139C	703.686	-0.196688	0.12229	-1.60838	0.107753	0.296579
YDR361C	966.17	-0.0404457	0.13319	-0.303669	0.76138	0.894426
YLR445W	1.92034	0.0647809	1.09158	0.0593461	0.952676	0.982341
YGL255W	6759.49	-1.16506	0.12929	-9.01125	2.03719e-19	1.26326e-17
YFR007W	303.266	0.230073	0.120813	1.90437	0.0568621	0.194512
YLR333C	3587.31	-0.0977119	0.127157	-0.768434	0.442229	0.686776
YHR103W	1086.8	-0.340405	0.11439	-2.97583	0.00292199	0.0197876
YHL030W	612.044	-0.0581726	0.153808	-0.378215	0.705271	0.863228
YGL077C	1020.59	-1.8343	0.105024	-17.4655	2.62563e-68	1.18622e-65
YPL204W	3797.61	0.170755	0.0828417	2.06122	0.0392818	0.150672
YPL251W	2.42449	1.61052	1.03445	1.55688	0.119499	0.316942
YIL009C-A	163.693	-0.291936	0.149116	-1.95777	0.0502566	0.177781
YOR091W	1525.68	0.080475	0.106851	0.75315	0.45136	0.692421
YGR026W	564.927	-0.12746	0.165563	-0.769856	0.441385	0.685937
YAL040C	4898.63	0.371824	0.100124	3.71363	0.000204307	0.00206099
YDR288W	303.719	-0.146111	0.122555	-1.1922	0.233181	0.477937
YGL208W	499.001	0.0204022	0.137905	0.147944	0.882387	0.953
YNL284C	798.231	-0.158235	0.0994859	-1.59053	0.111715	0.303392
YIL164C	137.12	0.300271	0.158206	1.89797	0.0576994	0.196537
YOL143C	1073.41	-0.112375	0.122233	-0.919347	0.357914	0.614258
YBR237W	882.642	0.142807	0.091486	1.56097	0.118531	0.315932
YBR197C	289.437	0.0936822	0.153242	0.611336	0.540977	0.758016
YHR147C	804.853	0.18035	0.0982564	1.83551	0.0664306	0.215033
YJL093C	822.232	0.0628672	0.0883372	0.711673	0.476667	0.712242
YPL126W	3882.58	0.211322	0.114562	1.84461	0.0650946	0.212311
YMR317W	23.8667	-0.0655644	0.374486	-0.175079	0.861018	0.944303
YOR251C	816.236	0.0755507	0.117186	0.644705	0.519118	0.742184
YPR181C	3870.26	-0.254356	0.0771359	-3.29751	0.000975462	0.00793033
YCL008C	415.268	-0.0185046	0.127768	-0.14483	0.884845	0.95457
YOR107W	1015.31	1.07471	0.177756	6.04596	1.48527e-09	4.38988e-08
YML005W	435.86	-0.0532056	0.111426	-0.477496	0.633009	0.818862
YNL215W	473.616	0.029173	0.10667	0.273489	0.784477	0.902641
YCR075W-A	167.467	0.0492238	0.16719	0.294418	0.768439	0.896417
YDL059C	108.216	0.0291898	0.165704	0.176156	0.860171	0.944303
YOR204W	3385.47	0.432253	0.151675	2.84987	0.00437376	0.0270413
YEL012W	675.997	0.150969	0.11637	1.29732	0.194522	0.428259
YBL040C	701.885	-0.668949	0.183424	-3.64701	0.000265312	0.00256199
YPR043W	6533.43	-0.201486	0.149865	-1.34445	0.178803	0.407396
YDR382W	6545.31	-0.163548	0.137886	-1.18611	0.235579	0.481433
YDR483W	3896.24	0.194307	0.103525	1.87691	0.060531	0.202785
YER061C	349.733	0.201497	0.132656	1.51895	0.128776	0.332725
YLR022C	475.785	0.142832	0.135579	1.0535	0.292112	0.551031
YLR402W	99.8914	0.134119	0.187975	0.713495	0.475539	0.711397
YLR073C	631.879	0.138389	0.162599	0.851106	0.39471	0.644824
YER183C	302.079	-0.119413	0.139379	-0.856747	0.391585	0.642139
YHR090C	489.172	0.224611	0.0913719	2.45821	0.0139633	0.0689446
YOL021C	2207.81	0.200134	0.094486	2.11814	0.0341634	0.136502
YHR030C	3151.53	0.215174	0.0926908	2.32142	0.0202644	0.0922102
YBR295W	938.417	0.25621	0.0959677	2.66975	0.00759073	0.0420174
YKL018W	457.393	0.0193784	0.112814	0.171773	0.863616	0.944455
YIL011W	80.5589	0.801002	0.189288	4.23165	2.31981e-05	0.000295228
YEL034W	13253.9	-0.257307	0.0928576	-2.77098	0.00558872	0.0329872
YHL015W	8871.02	-0.249547	0.130738	-1.90875	0.0562945	0.192883
YNR050C	1053.07	0.0703611	0.250749	0.280604	0.779014	0.900426
YDR134C	2732.87	0.435411	0.12623	3.44936	0.000561925	0.00498482
YKL208W	249.154	0.0602958	0.124926	0.482653	0.629342	0.816272
YGR004W	227.902	-0.243001	0.127166	-1.91089	0.0560188	0.19246
YML110C	1640.83	0.14964	0.110825	1.35024	0.17694	0.40534
YGL048C	1837.72	0.016816	0.0832326	0.202037	0.839888	0.934004
YGL243W	361.478	-0.00407155	0.0994981	-0.0409209	0.967359	0.987499
YKL106W	674.565	-0.220539	0.0967655	-2.2791	0.0226609	0.100866
tN(GUU)N1	15.9647	0.335051	0.39973	0.838193	0.401922	0.651335
YPR029C	1008.4	-0.0303223	0.132643	-0.228601	0.819179	0.921285
YJL034W	24202.3	-1.25979	0.220426	-5.71524	1.09549e-08	2.76054e-07
YFL048C	1063.67	-0.0985756	0.0769739	-1.28064	0.200321	0.43649
YLR117C	750.635	0.0587868	0.0996657	0.589839	0.555298	0.767875
YOR176W	1011.54	-0.765374	0.169238	-4.52248	6.11182e-06	9.15356e-05
YOR109W	1073.17	0.0700966	0.124999	0.560776	0.574951	0.782056
YBL089W	304.692	0.142024	0.130202	1.0908	0.275361	0.532364
YDL084W	3405.22	-0.248141	0.0867726	-2.85966	0.0042409	0.0265318
YGL116W	533.546	0.0335019	0.0999815	0.335081	0.737564	0.881485
YNR034W-A	1715.11	0.132355	0.164585	0.804177	0.421295	0.667674
YCR024C	414.667	0.0729906	0.17081	0.42732	0.669146	0.840944
YIL102C-A	129.153	0.0657013	0.19057	0.344761	0.730274	0.87761
YMR102C	1078.64	1.21124	0.106703	11.3515	7.28754e-30	6.9839e-28
YCR071C	524.406	-0.093836	0.104317	-0.899531	0.36837	0.622812
YDR175C	823.535	0.0427357	0.10086	0.423713	0.671775	0.84213
YOR189W	302.406	-0.163266	0.148478	-1.0996	0.271508	0.528559
YOR154W	560.919	-0.337629	0.132488	-2.54838	0.0108224	0.0562925
YPR121W	492.369	0.226134	0.0935928	2.41615	0.0156856	0.07575
YBR070C	375.84	-0.255352	0.129852	-1.96648	0.0492431	0.17567
YLL017W	10.3317	0.0608959	0.536117	0.113587	0.909565	0.964008
YDR351W	1312.86	0.111612	0.105368	1.05926	0.289482	0.548688
YNL315C	933.209	0.0858224	0.0933477	0.919384	0.357895	0.614258
YPR174C	407.844	-0.0889539	0.146931	-0.605411	0.544906	0.760061
YJR045C	12075	0.144286	0.092473	1.56031	0.118687	0.316189
YMR008C	2541.13	-0.0240093	0.122874	-0.195398	0.845081	0.936101
YDR349C	1710.51	0.0181596	0.0808101	0.224719	0.822198	0.923039
YDL171C	2485.34	-0.127041	0.0950168	-1.33704	0.181211	0.409929
YKL062W	1786.22	0.86903	0.0718325	12.098	1.08216e-33	1.24448e-31
YJR010W	405.201	-0.611487	0.185204	-3.3017	0.00096101	0.00784581
YJL218W	58.4848	-0.708582	0.292357	-2.42369	0.0153639	0.0745221
YIL126W	1722.16	-0.170173	0.0922339	-1.84501	0.0650356	0.212311
YDR093W	1004.83	-0.313245	0.090951	-3.44411	0.000572951	0.00506134
YMR282C	610.205	-0.525763	0.122113	-4.30554	1.66582e-05	0.000221351
YIL109C	4476.92	-0.406886	0.110556	-3.68036	0.000232905	0.00230744
YFL022C	4088.52	-0.134697	0.116136	-1.15982	0.246122	0.49593
YPL109C	268.361	-0.125554	0.146329	-0.85803	0.390876	0.641985
YJL156C	732.984	0.137481	0.110109	1.24858	0.211818	0.45079
YNL071W	3344.14	-0.21245	0.107885	-1.96924	0.0489259	0.175111
YMR088C	773.985	-0.485357	0.110138	-4.40683	1.04896e-05	0.000148096
YGR211W	2202.59	0.136253	0.114625	1.18869	0.234563	0.480288
YKL139W	665.73	0.205718	0.132446	1.55323	0.120369	0.317896
YJL069C	1683.52	0.136911	0.0922007	1.48492	0.137565	0.34693
YDR323C	172.498	-0.095387	0.156662	-0.608872	0.542609	0.759125
YDR344C	9.04303	0.353305	0.609139	0.580007	0.56191	0.773467
YJL016W	763.738	0.427187	0.122126	3.49792	0.000468905	0.00424277
YDR444W	726.819	-0.0774503	0.100545	-0.770304	0.44112	0.685937
YPL189W	65.275	0.764106	0.218467	3.49758	0.000469493	0.00424277
YLR285W	591.775	-0.148253	0.0931328	-1.59185	0.111419	0.303106
YLR267W	127.044	0.0433216	0.265982	0.162874	0.870617	0.947137
YDL219W	342.133	-0.330423	0.165773	-1.99323	0.0462365	0.168751
YNL017C	6.96146	0.505557	0.617621	0.818555	0.41304	0.660384
YCR024C-A	1256.22	0.166729	0.140326	1.18816	0.234771	0.480403
YCR024C-B	1641.75	0.230424	0.203704	1.13117	0.257982	0.51312
YKR024C	1818.67	0.224549	0.109296	2.0545	0.0399269	0.15204
YBR156C	423.485	0.0333737	0.103645	0.322001	0.747452	0.886486
YOR076C	350.726	-0.146865	0.226066	-0.649653	0.515916	0.739937
YEL059C-A	197.237	-0.0311018	0.180342	-0.172461	0.863075	0.944309
YDR405W	1260.33	0.293188	0.121622	2.41065	0.0159242	0.0765936
YOL091W	108.899	0.204878	0.221944	0.923107	0.355951	0.613793
YCL031C	1213.55	0.00458243	0.108168	0.0423642	0.966208	0.987499
YIL027C	262.207	-0.351184	0.20073	-1.74953	0.0801988	0.242584
YLR459W	365.077	-0.320156	0.161834	-1.9783	0.0478948	0.172581
YNL243W	2327.88	-0.277616	0.111407	-2.49192	0.0127054	0.0640332
YNR026C	1268.14	0.0628373	0.124816	0.503438	0.614656	0.808422
YHL044W	44.3441	0.752959	0.248836	3.02592	0.00247875	0.0173047
YPR204W	4790.15	-0.0546659	0.104503	-0.523104	0.600902	0.799087
YNL297C	668.933	-0.253345	0.200045	-1.26644	0.205354	0.442243
YBR170C	610.249	0.107559	0.0893599	1.20366	0.22872	0.472608
YGR149W	390.341	-0.416398	0.212143	-1.96282	0.0496673	0.176527
YDR458C	770.547	0.0630116	0.155554	0.405079	0.68542	0.850262
YKL193C	549.987	0.0654241	0.138604	0.472023	0.63691	0.822314
YPR099C	9.26926	-0.438982	0.516941	-0.849192	0.395774	0.645382
YLR310C	1564.13	-0.106424	0.139153	-0.7648	0.44439	0.68816
YNR008W	574.279	0.0953603	0.087286	1.0925	0.274612	0.531715
YJR150C	4.46569	1.16305	0.84871	1.37037	0.17057	0.396785
YBR301W	3.94186	-0.101113	0.775055	-0.130459	0.896203	0.959439
YLR003C	759.007	-0.014656	0.119601	-0.122541	0.902471	0.961126
YER113C	674.169	-0.228455	0.127928	-1.78581	0.0741296	0.228879
YHR122W	595.244	0.0909042	0.100065	0.908451	0.36364	0.618925
YHL017W	581.36	0.0490455	0.115842	0.423382	0.672016	0.84213
YJR010C-A	176.488	-0.196561	0.141057	-1.39348	0.163474	0.386821
YIL085C	973.629	0.114137	0.0842798	1.35427	0.175651	0.403851
YMR190C	570.898	0.0284503	0.0937898	0.303341	0.76163	0.894426
YLR325C	5905.37	-0.210778	0.138032	-1.52702	0.126755	0.329521
YOR272W	1887.94	0.127234	0.10864	1.17115	0.241536	0.48981
YOR058C	462.879	0.309749	0.122344	2.53178	0.0113486	0.0584528
YAL064W-B	33.1342	0.00789208	0.293684	0.0268727	0.978561	0.992284
YDR413C	5.34324	0.0962994	0.731576	0.131633	0.895275	0.959397
YBR203W	1657.84	0.504367	0.162238	3.10881	0.00187844	0.0137992
YAR029W	18.8305	-0.356271	0.44511	-0.800411	0.423473	0.669616
YNL238W	1636.54	0.0371125	0.0825156	0.449763	0.652881	0.83222
YJL198W	2083.11	0.104197	0.106373	0.979544	0.327311	0.585476
YOL135C	240.217	0.138317	0.16872	0.819802	0.412329	0.659747
YOR323C	1571.39	-0.150462	0.107471	-1.40003	0.161505	0.383456
YLL041C	3827.09	-1.8284	0.13097	-13.9604	2.71737e-44	4.523e-42
YKR074W	601.959	-0.222662	0.131728	-1.69031	0.0909685	0.264541
YMR274C	115.781	-0.266304	0.164324	-1.6206	0.105104	0.292178
YER026C	868.147	-1.4164	0.107574	-13.1668	1.36284e-39	1.87391e-37
YMR201C	377.6	0.13515	0.106953	1.26364	0.20636	0.44305
YLR069C	2020.98	-0.00723059	0.11519	-0.0627711	0.949949	0.980647
YML042W	354.679	0.0101362	0.175778	0.0576647	0.954016	0.982921
YMR050C	1295.72	0.385623	0.217441	1.77346	0.0761519	0.233489
YDR069C	416.136	-0.208335	0.174999	-1.19049	0.233854	0.478992
YOR298W	37.4034	-0.12142	0.280026	-0.433603	0.664577	0.8391
YEL066W	704.967	-0.164256	0.110366	-1.48829	0.136674	0.345234
YPR035W	22877.7	0.563402	0.166353	3.38679	0.000707166	0.00598772
YDR014W	212.934	0.0260808	0.187223	0.139303	0.889211	0.956583
YDR227W	881.338	-0.128806	0.123142	-1.04599	0.295564	0.554731
YPR060C	496.45	-0.140614	0.11012	-1.27691	0.201634	0.43841
YMR037C	975.344	0.112961	0.126526	0.892787	0.371971	0.626419
YCR038C	219.05	0.186345	0.131765	1.41422	0.157297	0.376715
YNL257C	477.15	-0.505468	0.172168	-2.93591	0.00332573	0.0220034
YCR072C	1622.81	0.0896448	0.131943	0.679419	0.496872	0.727818
YBR093C	2311.24	0.574396	0.186126	3.08606	0.00202826	0.0146929
YNL092W	94.966	0.390473	0.213559	1.82841	0.0674887	0.216545
YGR045C	9.45357	-1.63705	0.567115	-2.88663	0.00389388	0.0247526
YAL037C-B	21.2204	0.0522596	0.711634	0.0734361	0.941459	0.976345
YLR134W	197.108	-0.300813	0.157213	-1.91341	0.055695	0.19166
YMR203W	2557.83	-0.0506086	0.0929223	-0.544634	0.586005	0.789117
YKL096C-B	2.32173	0.973557	1.00295	0.970691	0.331702	0.590658
YPL225W	1441.83	0.0100559	0.121371	0.0828529	0.933968	0.972979
YPL270W	945.586	-0.334496	0.0841489	-3.97505	7.03643e-05	0.000800457
YDL012C	391.754	-0.195626	0.148462	-1.31769	0.187607	0.419596
YDR218C	159.515	0.159345	0.256516	0.62119	0.534475	0.753747
YLR299W	1283.29	0.368913	0.0980278	3.76335	0.000167653	0.00172705
YFL003C	86.3846	0.250794	0.203437	1.23278	0.217657	0.45813
YPL051W	303.68	0.247993	0.110939	2.23541	0.0253905	0.109621
YNL054W	891.831	-0.131046	0.0861448	-1.52123	0.128202	0.331918
YDR156W	601.407	0.0675576	0.151645	0.445499	0.655959	0.834631
YPL062W	1.45626	-1.39479	1.29125	-1.08019	0.280058	0.538573
YPR155C	331.084	-0.410597	0.165306	-2.48386	0.0129966	0.0652407
YOR137C	349.956	0.158367	0.173112	0.914823	0.360285	0.616059
YKL123W	108.631	0.0552956	0.166562	0.331982	0.739903	0.882148
YKL172W	2645.03	0.0891088	0.108065	0.824582	0.409609	0.657557
YNL336W	541.714	-0.30755	0.195624	-1.57215	0.115916	0.311191
YDR305C	214.437	-0.124798	0.142386	-0.876476	0.380771	0.632348
YJL057C	469.823	0.188132	0.145672	1.29147	0.19654	0.431187
YPR100W	889.268	-0.127942	0.10101	-1.26663	0.205286	0.442243
YDR358W	324.003	0.30836	0.170208	1.81167	0.0700375	0.22111
YJL152W	14.1622	-2.0745	0.597324	-3.473	0.000514676	0.00461095
YLR096W	1277.25	0.0819079	0.0978096	0.837423	0.402355	0.651702
YKR052C	185.546	-0.133875	0.126718	-1.05648	0.29075	0.550387
YLR427W	829.704	-0.107157	0.0835497	-1.28256	0.199647	0.435888
YDL152W	2.19117	0.36914	0.988432	0.37346	0.708806	0.865148
YGL015C	16.7331	-0.115904	0.375751	-0.308461	0.757732	0.892487
YEL064C	220.986	-0.173901	0.143381	-1.21286	0.225182	0.467409
YMR127C	433.056	0.0128373	0.109031	0.117739	0.906274	0.962461
YIL140W	2153.69	-0.300236	0.0932823	-3.21858	0.00128829	0.0100972
YOL163W	37.9492	0.274395	0.268573	1.02168	0.306933	0.565826
YLR197W	4892.55	-0.03675	0.103312	-0.355718	0.722052	0.872682
YBR213W	266.401	-0.294427	0.149528	-1.96904	0.0489481	0.175111
YAL064W	2.96092	0.169447	0.976795	0.173472	0.86228	0.944309
YJL204C	274.733	-0.0709552	0.145327	-0.488246	0.625376	0.81427
YLR244C	2290.24	0.320552	0.093032	3.44561	0.000569766	0.00504024
YJR084W	384.962	0.100641	0.118655	0.84818	0.396337	0.645426
YLR233C	337.365	-0.184561	0.168536	-1.09508	0.27348	0.531089
YDL238C	155.685	0.402874	0.172982	2.329	0.0198592	0.0908896
YGL084C	542.152	-0.322564	0.135924	-2.37312	0.0176383	0.082946
YLR382C	1341.08	0.169773	0.0903637	1.87878	0.0602751	0.202296
YLR154C-H	4.69362	0.423273	0.968966	0.436829	0.662235	0.837393
YLR154C-G	214.16	0.435807	0.226904	1.92066	0.0547742	0.18947
YGR238C	338.929	-0.391897	0.145754	-2.68875	0.00717202	0.0402471
YDR363W	573.772	0.209774	0.0939654	2.23247	0.0255842	0.110232
YNL114C	27.6725	0.736225	0.491652	1.49745	0.134276	0.341769
YNL163C	2517.73	0.342872	0.142574	2.40487	0.016178	0.0774023
snR55	1.70275	-0.144272	1.24423	-0.115952	0.90769	0.963279
snR54	7.78096	0.272329	0.757033	0.359732	0.719048	0.87126
snR57	7.61434	0.388371	0.679537	0.571524	0.567645	0.77635
YHR009C	1264.76	-0.0371913	0.116775	-0.318487	0.750116	0.888039
snR50	17.1929	0.242746	0.396502	0.61222	0.540392	0.757815
YFR050C	1489.55	0.0417308	0.0937929	0.444925	0.656374	0.834631
YLR331C	2.10078	1.18391	1.2063	0.981434	0.326379	0.58447
YNR069C	160.644	0.118345	0.166479	0.71087	0.477164	0.712509
YOL058W	2621.15	-1.25595	0.138149	-9.09127	9.78862e-20	6.31765e-18
YAR019C	443.517	-0.124271	0.159927	-0.777051	0.437129	0.682676
YML129C	469.037	0.225797	0.145023	1.55697	0.119477	0.316942
YGL257C	602.673	-0.155783	0.112946	-1.37927	0.167812	0.39377
YGR020C	1417.37	0.0148789	0.122994	0.120972	0.903713	0.961547
YOR093C	544.896	-0.0974365	0.144583	-0.673914	0.500366	0.730212
YAL046C	399.948	-0.521904	0.149949	-3.48054	0.000500409	0.00450757
YOR392W	16.3754	1.23407	0.426514	2.89339	0.0038111	0.024359
YAL039C	3292.59	0.671753	0.137863	4.8726	1.10141e-06	1.95686e-05
YGR100W	874.435	0.141071	0.103158	1.36752	0.171463	0.397836
YLR403W	1724.47	0.30215	0.109615	2.75646	0.00584301	0.0341878
YOL118C	15.6385	-0.650085	0.41461	-1.56794	0.116895	0.313023
YDR286C	185.063	0.307547	0.166393	1.84832	0.0645559	0.211331
YHR141C	6604.41	-0.214123	0.137942	-1.55227	0.120597	0.318222
YPL128C	635.53	-0.0233866	0.115763	-0.202021	0.8399	0.934004
YJL091C	355.036	-0.925724	0.212578	-4.35476	1.33216e-05	0.000181985
YBR191W	7371.58	-0.264927	0.150843	-1.75631	0.0790358	0.240106
YDR380W	2448.52	0.74038	0.138876	5.33123	9.75473e-08	2.16487e-06
YGR191W	3037.33	0.341403	0.115435	2.95753	0.00310118	0.0207786
YGR047C	712.73	0.0244507	0.112602	0.217143	0.828097	0.926675
YDR485C	1075.73	0.274356	0.0816902	3.35849	0.000783693	0.00656538
YPL239W	1081.41	-0.0520464	0.125103	-0.416029	0.677389	0.844908
YPR183W	2428.22	-0.511979	0.14309	-3.57801	0.000346221	0.00323126
YOR206W	2770.11	-0.0791358	0.134461	-0.588541	0.556169	0.768743
YEL049W	71.2365	0.430205	0.211108	2.03785	0.0415652	0.156581
YOR391C	142.555	0.78565	0.250782	3.1328	0.00173146	0.0128237
YDR525W-A	200.702	-0.0715977	0.16773	-0.426863	0.669479	0.840944
YLR075W	23031.4	0.0254141	0.145108	0.175139	0.860971	0.944303
YBR054W	4552.61	0.332355	0.210508	1.57882	0.114377	0.308237
YLR020C	752.105	-0.180328	0.0971021	-1.8571	0.0632972	0.209056
YNL217W	685.399	-0.978677	0.108676	-9.00544	2.14807e-19	1.31908e-17
YLR404W	160.443	-0.0750629	0.148739	-0.504661	0.613797	0.807796
YIL013C	297.635	0.385713	0.139023	2.77445	0.00552957	0.0327171
YPL206C	1059	0.194596	0.0824093	2.36134	0.0182091	0.0850611
YDL060W	2711.45	0.122708	0.0919725	1.33418	0.182145	0.411375
YBR293W	546.888	0.265376	0.107011	2.4799	0.0131417	0.06577
YNR052C	951.874	0.0779472	0.0888829	0.876965	0.380506	0.632329
YHR032W	1365.39	0.304326	0.13926	2.1853	0.0288667	0.1202
YEL032W	1895.53	0.329891	0.140392	2.34979	0.0187843	0.0869769
YOL076W	421.867	-0.369031	0.144059	-2.56166	0.0104173	0.0545082
YHR203C	11958.5	-0.223431	0.132582	-1.68522	0.0919459	0.2667
YML112W	354.578	0.130489	0.106131	1.22951	0.21888	0.460245
YLR154W-C	8.85812	0.732488	0.521031	1.40584	0.159771	0.380621
YGL241W	445.354	-0.152743	0.159671	-0.956611	0.338764	0.59768
YDL071C	5.93292	-0.361951	0.626618	-0.577626	0.563517	0.774778
YPR176C	490.737	-0.013112	0.102688	-0.127688	0.898396	0.959529
YDR057W	674.847	-0.0964599	0.104425	-0.923725	0.355629	0.61374
YJL036W	522.95	0.0257226	0.112122	0.229416	0.818546	0.921228
YER009W	1892.25	-0.246423	0.108238	-2.27667	0.0228059	0.101297
YLR115W	734.573	0.113889	0.0984484	1.15683	0.24734	0.497275
YGL114W	976.313	-0.087601	0.0870028	-1.00688	0.313995	0.573822
YER167W	1924.73	0.051806	0.0802705	0.645393	0.518672	0.74203
YMR104C	1989.25	0.0571739	0.129361	0.441971	0.65851	0.835077
YER185W	65.0394	-0.171473	0.266113	-0.64436	0.519342	0.742337
YDL195W	2868.59	-0.454205	0.107267	-4.23434	2.2922e-05	0.000292301
YNL199C	1095.04	-0.0548685	0.0986913	-0.55596	0.578238	0.783299
YCR026C	1514.8	0.386631	0.0760823	5.08175	3.73978e-07	7.48548e-06
YBL052C	546.355	-0.150697	0.124875	-1.20679	0.227513	0.471193
YBR076W	27.5857	0.0623585	0.337169	0.184947	0.85327	0.94056
YNL317W	565.697	-0.12814	0.100411	-1.27616	0.201899	0.438733
YLL019C	2125.91	-0.255297	0.127659	-1.99984	0.0455172	0.16702
YOR156C	345.288	0.138234	0.121442	1.13828	0.255005	0.50993
YHR052W	2594.81	0.161643	0.114395	1.41302	0.157649	0.376986
YKR026C	751.841	0.00539639	0.10139	0.0532243	0.957553	0.983841
YJR043C	435.214	-0.0879273	0.101901	-0.86287	0.388209	0.639196
YJR012C	163.829	-0.126734	0.138713	-0.913639	0.360906	0.616569
YKL060C	78938.4	0.114743	0.151557	0.757095	0.448993	0.690802
YCR044C	355.111	-0.0603599	0.0980823	-0.615401	0.53829	0.756338
YKL035W	1318.52	-0.0709685	0.195627	-0.362775	0.716773	0.86967
YLR264C-A	1.73553	0.397846	1.16502	0.341493	0.732732	0.87903
YNL073W	1610.97	0.0675918	0.0723048	0.934818	0.349882	0.608742
YMR280C	650.368	-0.82389	0.188557	-4.36945	1.24561e-05	0.000172774
YFL020C	44.5237	0.241806	0.224162	1.07871	0.280717	0.539503
YNL328C	55.1422	0.134227	0.272795	0.492043	0.622689	0.81198
YJL014W	2480.91	-0.0876308	0.0965352	-0.907761	0.364005	0.618925
YMR031C	1197.15	-0.131199	0.207001	-0.633807	0.526207	0.747252
YOR174W	475.662	-0.341393	0.105221	-3.24452	0.00117647	0.00937174
YPR149W	1430.94	0.0108622	0.212235	0.05118	0.959182	0.984076
YNL015W	2759.53	-0.931346	0.141266	-6.59285	4.31472e-11	1.47517e-09
YCR084C	2508.4	-0.188863	0.0880213	-2.14565	0.0319008	0.129757
YHR178W	356.525	0.155797	0.124087	1.25555	0.20928	0.447497
YDR260C	244.105	-0.0292645	0.143461	-0.20399	0.838361	0.933563
YLR283W	224.661	0.040326	0.145702	0.27677	0.781957	0.901193
YPL170W	1029.31	0.277163	0.135937	2.0389	0.0414596	0.156276
YPR001W	169.528	-0.0990582	0.155932	-0.635267	0.525254	0.746648
YDR204W	339.977	-0.0820131	0.148043	-0.553983	0.57959	0.784152
YBR085C-A	1920.86	0.580829	0.15384	3.77554	0.000159663	0.00165553
YDR251W	1168.52	-0.0762495	0.125867	-0.605795	0.544651	0.760061
YNL048W	595.462	-0.291678	0.108502	-2.68823	0.00718321	0.0402471
YML057C-A	2.80289	-0.102124	0.97445	-0.104802	0.916533	0.966271
YOR074C	588.821	-0.200988	0.134379	-1.49568	0.134736	0.342246
YPL028W	3613.77	-0.444533	0.0983013	-4.52214	6.12167e-06	9.15356e-05
YJR152W	304.49	0.146182	0.114758	1.27382	0.202726	0.439426
YKL025C	611.778	0.0705229	0.108583	0.649484	0.516025	0.739937
YAR008W	351.937	-0.332122	0.129655	-2.56159	0.0104193	0.0545082
YOR003W	253.669	0.382156	0.14405	2.65294	0.00797935	0.0438492
YOL097C	1807.29	-0.120451	0.120527	-0.999372	0.317615	0.576933
YOR110W	466.116	-0.0877044	0.102535	-0.855362	0.392351	0.64274
YDR407C	795.842	-0.318414	0.179847	-1.77047	0.0766483	0.23477
YNR020C	403.406	0.039234	0.162358	0.24165	0.809051	0.915102
YBR258C	160.286	0.214883	0.159548	1.34682	0.178037	0.40697
YNL146W	14.9822	-0.750897	0.547147	-1.37239	0.169943	0.396054
YFR019W	872.222	0.101731	0.127042	0.800768	0.423266	0.669553
YLR262C-A	1222.46	-0.186599	0.122381	-1.52474	0.127324	0.330593
YBR223C	327.226	0.357645	0.110454	3.23797	0.00120384	0.00954169
YNL241C	3260.78	0.130811	0.12199	1.07231	0.283581	0.542596
YJL154C	1187.83	0.0513135	0.102313	0.501532	0.615997	0.809217
YDR091C	2777.61	-0.0769921	0.10362	-0.743023	0.457468	0.698066
YJL123C	1875.15	-0.0958179	0.0995717	-0.962301	0.335899	0.595347
YHR066W	2178.5	0.121977	0.102063	1.19512	0.23204	0.476381
YPL047W	230.775	0.264827	0.153643	1.72365	0.0847703	0.251842
YER086W	4140.64	0.286552	0.14775	1.93944	0.0524475	0.183809
YLR287C-A	5749.56	-0.0849576	0.136186	-0.623836	0.532735	0.752804
RPR1	4.13094	-0.748946	0.776551	-0.964452	0.33482	0.59445
YBR176W	276.201	-0.219614	0.119165	-1.84295	0.065337	0.212799
YDR207C	664.721	0.15257	0.107755	1.41589	0.156807	0.375826
YKL125W	1125.28	0.13977	0.13343	1.04752	0.294859	0.55423
YDR373W	627.437	-0.174973	0.147914	-1.18294	0.236833	0.482669
YGL238W	1294.9	-0.0947971	0.190213	-0.498375	0.61822	0.810236
YLR190W	1223.33	-0.324905	0.100854	-3.22156	0.00127497	0.0100176
YNL128W	93.1909	0.269885	0.185766	1.45282	0.146273	0.35985
YLR312C	606.173	0.36363	0.141213	2.57504	0.0100228	0.0528283
YKL191W	1678.28	-0.173946	0.116383	-1.49459	0.135021	0.342424
YNR006W	978.912	0.112515	0.085447	1.31678	0.187914	0.419877
YHR120W	582.919	-0.0742492	0.11945	-0.621595	0.534208	0.753539
YAR050W	249.218	0.370055	0.239995	1.54193	0.12309	0.32278
YOL137W	454.334	-0.15575	0.144484	-1.07797	0.281045	0.539589
YDR530C	425.661	-0.0365641	0.127666	-0.286405	0.774568	0.899716
YER111C	539.669	-0.330356	0.172477	-1.91536	0.0554464	0.191012
YER144C	1168.21	0.174094	0.0838519	2.07621	0.0378742	0.146517
YOL039W	5191.33	-0.206772	0.137192	-1.50717	0.131766	0.33816
YIL083C	574.094	-0.413047	0.0956249	-4.31945	1.56415e-05	0.000208719
YHL011C	3413.36	0.253654	0.12439	2.03919	0.0414312	0.156263
YGR184C	1410.33	0.094707	0.159039	0.595497	0.551511	0.76498
YMR303C	863.012	-0.860196	0.205698	-4.18185	2.89151e-05	0.000357903
YDR307W	290.204	-0.03883	0.200267	-0.193891	0.846261	0.93708
YDR411C	667.047	-0.721211	0.140945	-5.11697	3.10483e-07	6.35535e-06
YBR205W	781.442	-0.318683	0.0876702	-3.63502	0.000277956	0.00265971
YOR321W	557.277	-0.771417	0.115412	-6.68404	2.32437e-11	8.40093e-10
YMR186W	8895.3	0.133757	0.14491	0.923037	0.355988	0.613793
YMR278W	753.459	0.53827	0.0986184	5.45811	4.81227e-08	1.11493e-06
YLR136C	50.0164	0.0471927	0.278426	0.169498	0.865405	0.9448
YMR207C	598.761	-0.0819924	0.101444	-0.808257	0.418943	0.666284
YML015C	583.509	0.024049	0.104259	0.230665	0.817575	0.920792
YOR197W	1314.34	-0.195552	0.109277	-1.7895	0.0735336	0.227655
YKR089C	918.494	-0.218751	0.161986	-1.35043	0.176878	0.40534
YDL041W	2.72524	-0.148846	0.900138	-0.16536	0.868661	0.946378
YKR072C	2112.68	0.0403283	0.0960105	0.420041	0.674455	0.843736
YDL014W	6792.99	0.120359	0.140888	0.854292	0.392943	0.643211
YER079W	231.853	0.461595	0.154488	2.9879	0.00280904	0.0192286
YER024W	707.102	-0.173266	0.133241	-1.3004	0.193464	0.427256
YOR230W	5257.88	0.690508	0.113739	6.07096	1.27145e-09	3.77554e-08
YGR234W	14365.1	-1.83139	0.11598	-15.7906	3.61388e-56	9.52408e-54
YMR178W	467.373	0.23547	0.114017	2.06522	0.0389021	0.14976
YPR037C	611.161	0.169082	0.149079	1.13417	0.256722	0.51223
YEL068C	149.601	-0.00305186	0.155765	-0.0195927	0.984368	0.995466
YNL090W	315.04	-0.608917	0.149917	-4.06169	4.87189e-05	0.000572764
YOR307C	612.569	0.178601	0.122289	1.46049	0.144157	0.356725
YMR225C	669.265	0.0902751	0.110822	0.814593	0.415305	0.663071
YBR095C	621.253	-0.283191	0.0862921	-3.28177	0.00103157	0.00836494
YDR036C	1080.2	-0.10115	0.0971905	-1.04074	0.297998	0.55715
YGR043C	853.927	1.41509	0.162282	8.71997	2.78278e-18	1.62973e-16
YPL223C	646.66	3.23119	0.428448	7.54163	4.64148e-14	2.15863e-12
YPL272C	278.671	-0.870465	0.211409	-4.11744	3.83107e-05	0.000463313
YPR002C-A	56.6542	0.215436	0.259461	0.830323	0.406356	0.654843
YOL002C	1390.04	-0.18729	0.195663	-0.957209	0.338462	0.597314
YFL005W	1272.39	-0.0236901	0.0734932	-0.322345	0.747192	0.886446
YCR010C	20.7847	-0.105547	0.388653	-0.271571	0.785952	0.903188
YMR152W	562.59	-0.042351	0.143275	-0.295592	0.767542	0.896417
YDR154C	4665.52	0.23245	0.154334	1.50614	0.13203	0.338254
YMR125W	1509.79	-0.225068	0.179399	-1.25456	0.209637	0.447958
YJR031C	610.872	-0.0314265	0.105271	-0.29853	0.765299	0.895894
YCL026C-A	19.6951	-1.0747	0.38503	-2.79122	0.00525101	0.0313623
YCL026C-B	342.77	-0.128728	0.162199	-0.793644	0.427403	0.672635
YGR118W	6794.75	-0.207526	0.137556	-1.50866	0.131385	0.337533
YJL055W	1406.31	-0.0909406	0.114204	-0.796298	0.425859	0.671041
YPR102C	7449.31	-0.167315	0.153911	-1.08709	0.276996	0.533821
YNL334C	265.21	-0.186114	0.15846	-1.17452	0.240187	0.487855
YGL123W	18343.4	-0.211028	0.144793	-1.45745	0.144993	0.358067
YPL064C	553.107	0.179649	0.112391	1.59842	0.109949	0.300789
YPL086C	1107.7	0.153184	0.0870136	1.76046	0.0783306	0.238537
Q0250	2.45738	-0.670308	1.04186	-0.643373	0.519982	0.742718
YPR153W	120.631	0.626773	0.16627	3.76961	0.000163506	0.00168707
YMR042W	282.276	0.158959	0.142379	1.11645	0.26423	0.518961
YLL003W	679.815	0.100999	0.152044	0.664274	0.506515	0.733945
YER042W	285.237	0.177586	0.146169	1.21493	0.224392	0.466408
YDR109C	753.944	0.16327	0.0863072	1.89173	0.0585266	0.197961
YDR221W	559.947	0.184049	0.108488	1.69649	0.0897936	0.262451
YLR109W	6180.25	0.993587	0.211863	4.68975	2.73536e-06	4.41356e-05
YKR009C	549.808	-1.16809	0.142246	-8.21179	2.1792e-16	1.12979e-14
YMR078C	667.619	-0.355304	0.0899363	-3.95061	7.79511e-05	0.000872639
YLR094C	1184.55	-0.259449	0.0951636	-2.72635	0.00640395	0.0367226
YBR037C	381.039	0.242736	0.138937	1.74709	0.080621	0.243253
YLR041W	31.2643	0.336949	0.315363	1.06845	0.285319	0.544223
YJR060W	223.543	0.220048	0.146482	1.50222	0.133041	0.340397
YNL161W	1288.09	-0.270749	0.0811422	-3.33672	0.000847723	0.00706436
YIL146C	508.572	0.1524	0.106048	1.43708	0.150695	0.367397
YLR195C	905.114	0.00607457	0.0834351	0.0728059	0.941961	0.976545
YLR231C	694.664	-0.329603	0.109274	-3.01631	0.00255873	0.0177846
YKL016C	3239.09	-1.62999	0.085101	-19.1536	9.03091e-82	7.14007e-79
YPL111W	867.604	-0.671526	0.115794	-5.79933	6.65804e-09	1.75467e-07
YKL174C	611.94	-0.351952	0.106412	-3.30745	0.00094149	0.00773367
YKL121W	537.369	0.139186	0.152652	0.911783	0.361883	0.617456
YLR380W	1236.47	-0.216648	0.119063	-1.81961	0.0688182	0.219062
YOR142W-B	7678.08	0.0447143	0.115635	0.386684	0.698991	0.859243
YMR012W	4341	-0.525157	0.130936	-4.01079	6.05165e-05	0.00069848
YER093C	715.744	0.040558	0.139946	0.289812	0.77196	0.899033
YOR032W-A	8.56163	0.472083	0.547175	0.862764	0.388267	0.639196
YDL201W	1014.44	-0.070407	0.105282	-0.668746	0.503657	0.731962
YDR468C	598.677	0.0432666	0.0936106	0.462198	0.643939	0.826678
snR73	2.41622	0.950897	0.9686	0.981724	0.326236	0.58447
snR72	1.56782	0.23435	1.4079	0.166453	0.8678	0.946025
snR71	2.63442	0.616272	0.955381	0.645053	0.518893	0.74203
snR70	29.7436	0.752166	0.283691	2.65136	0.0080169	0.0439782
snR77	5.97975	0.643358	0.758025	0.84873	0.396032	0.645382
snR76	68.2727	0.0894384	0.19488	0.45894	0.646277	0.827484
snR75	5.05487	0.24529	0.67337	0.364273	0.715654	0.869268
snR74	2.29019	-0.0160318	1.16047	-0.0138149	0.988978	0.995816
YFR003C	265.568	-0.0217492	0.119326	-0.182268	0.855372	0.941295
snR79	1.13586	-0.0598152	1.4498	-0.0412576	0.967091	0.987499
snR78	1.23036	0.714751	1.37323	0.520489	0.602723	0.800215
YIL033C	2328.84	0.0439336	0.0851827	0.515757	0.606024	0.801913
YOR368W	264.607	-0.0589449	0.152164	-0.387378	0.698477	0.859172
YGR128C	1648.85	-0.0464087	0.144023	-0.322232	0.747277	0.886446
YIL048W	820.983	-0.0631808	0.151289	-0.417616	0.676228	0.844666
YIL142C-A	1.38211	2.00592	1.4482	1.38512	0.166017	0.391083
YLR337C	1131	0.124715	0.138249	0.902105	0.367001	0.621352
YOL056W	259.846	0.225959	0.126518	1.78598	0.0741024	0.228879
YFR052W	1009.48	0.0762238	0.102723	0.742035	0.458066	0.698306
YGR088W	544.85	0.453659	0.276228	1.64233	0.100521	0.283457
YGL073W	996.527	-0.061403	0.0954613	-0.643224	0.520079	0.742718
YGL259W	20.0429	-0.363478	0.342971	-1.05979	0.289239	0.548556
YGR106C	1245.67	-0.151643	0.17643	-0.85951	0.390059	0.641478
YIL168W	77.9767	0.465625	0.177027	2.63025	0.00853233	0.0464032
YGL086W	674.397	0.090552	0.143331	0.631769	0.527538	0.747798
YAL044C	546.373	0.251873	0.153851	1.63712	0.101605	0.285496
YPR081C	362.695	-0.162616	0.1289	-1.26157	0.207105	0.44411
YDR284C	386.811	-0.0617129	0.171155	-0.360567	0.718423	0.87067
YJL097W	354.958	-0.482236	0.13875	-3.47558	0.000509753	0.00457331
YOR121C	4.00149	0.00415253	0.839727	0.0049451	0.996054	0.99858
YOR048C	1604.92	0.0793127	0.0759314	1.04453	0.29624	0.555176
YHR143W	1630.02	0.164718	0.146353	1.12548	0.260387	0.515334
YMR315W-A	19.5977	0.634094	0.354117	1.79063	0.073352	0.22752
YCL004W	321.865	0.153224	0.111685	1.37194	0.170083	0.396088
YPL042C	680.992	-0.170066	0.0933848	-1.82113	0.0685873	0.218511
YBL044W	1.20106	-2.27145	1.75584	-1.29365	0.195785	0.42998
YDR430C	1197.43	0.140788	0.123408	1.14083	0.253939	0.50812
YGL102C	7.35576	0.566037	0.687084	0.823825	0.410039	0.657747
YDR487C	1710.58	-0.107702	0.11773	-0.914825	0.360283	0.616059
YPR185W	570.037	-0.165284	0.113429	-1.45716	0.145073	0.358067
YER065C	1130.21	-1.15395	0.208117	-5.54473	2.94413e-08	7.13472e-07
YLR077W	1039.35	-0.0151439	0.0996841	-0.151919	0.879251	0.951293
YBR056W	588.08	0.217703	0.193113	1.12733	0.259603	0.514246
YLL020C	239.704	-0.386924	0.180559	-2.14293	0.032119	0.130226
YHR034C	252.39	0.0969898	0.128683	0.753712	0.451022	0.692071
YBL019W	252.157	0.143413	0.114904	1.24812	0.211988	0.450879
YOL070C	801.591	-0.0391383	0.130809	-0.299202	0.764786	0.895459
YJL085W	383.627	-0.244042	0.15654	-1.55897	0.119003	0.316523
YPL200W	69.0579	-0.95644	0.260552	-3.67083	0.000241765	0.00238559
YNR054C	841.655	0.139547	0.11064	1.26127	0.207212	0.44411
YDR130C	257.552	0.257343	0.114502	2.2475	0.0246081	0.107342
YIL015W	714.923	-0.787582	0.158695	-4.96285	6.94657e-07	1.29227e-05
YEL030W	193.436	0.535018	0.155269	3.44575	0.000569477	0.00504024
YBR291C	372.727	0.0889074	0.286748	0.310055	0.756519	0.891764
YML114C	951.827	0.20999	0.0938917	2.23651	0.0253183	0.109384
YHR201C	1056.72	0.117415	0.115885	1.01321	0.310961	0.570739
YNL299W	888.196	0.131593	0.0977964	1.34559	0.178436	0.407274
YGR008C	1345.29	-0.344984	0.195002	-1.76913	0.0768717	0.235149
YNL311C	385.497	0.00238138	0.15143	0.015726	0.987453	0.99548
YPR170C	2.41037	-0.098326	0.950911	-0.103402	0.917644	0.966271
YJL030W	333.921	-0.0948509	0.165112	-0.574465	0.565653	0.775918
YGR248W	173.002	0.539438	0.338648	1.59292	0.111179	0.302844
YBR074W	773.605	-0.194174	0.106117	-1.8298	0.0672796	0.216122
YOR150W	721.402	0.0555237	0.07862	0.706229	0.480046	0.713923
YML036W	153.972	-0.240532	0.170146	-1.41368	0.157456	0.376809
YDL236W	1319.58	-0.185844	0.125471	-1.48117	0.138561	0.348469
YDL088C	910.676	0.0218575	0.102668	0.212894	0.83141	0.928511
YLR113W	2439.3	0.256266	0.110866	2.31149	0.0208059	0.0939773
YLR142W	140.723	0.495101	0.161364	3.06822	0.00215335	0.0153724
YLL058W	509.002	-0.0129611	0.0980069	-0.132247	0.894789	0.959244
YDL197C	516.243	0.0329453	0.135946	0.242341	0.808516	0.91466
YER130C	1005.91	0.119299	0.090916	1.31219	0.189455	0.421492
YER165W	10137.5	0.058061	0.127743	0.454513	0.64946	0.829697
YMR106C	306.918	-0.0644747	0.133406	-0.483296	0.628886	0.816106
YER187W	26.2705	0.118465	0.306894	0.386013	0.699487	0.859245
YGL112C	1049.85	-0.200061	0.0918077	-2.17913	0.0293218	0.121727
YMR244W	338.675	1.83453	0.632934	2.89846	0.00375	0.0241044
YDL008W	239.256	0.0805836	0.159467	0.505332	0.613325	0.807445
YBL050W	1137.32	-0.0453761	0.084556	-0.53664	0.591516	0.792347
YJR086W	242.142	-0.274369	0.13976	-1.96314	0.0496294	0.176527
YJR014W	1468.94	0.202707	0.127795	1.5862	0.112695	0.305005
YHR050W	890.525	-0.297476	0.109318	-2.7212	0.00650448	0.0371307
YPL018W	163.473	-0.353279	0.160152	-2.2059	0.027391	0.115731
YPL185W	6.58526	-0.0671651	0.59706	-0.112493	0.910432	0.964084
YJR041C	839.161	-0.182289	0.207903	-0.876797	0.380597	0.632329
YKR028W	1540.51	-0.233461	0.102806	-2.27089	0.0231538	0.102554
YKL037W	1.69589	0.298395	1.33791	0.22303	0.823512	0.923542
YMR286W	481.622	0.276139	0.115997	2.38057	0.0172858	0.0817246
YDL175C	328.381	0.0205159	0.119928	0.171069	0.864169	0.944455
YKL168C	308.125	0.177532	0.138633	1.28059	0.200337	0.43649
YFL026W	1587.02	-0.441716	0.15649	-2.82265	0.00476291	0.0289112
YDL102W	931.574	-0.0789802	0.112525	-0.701888	0.482749	0.716085
YGL029W	602.847	0.176743	0.208277	0.848595	0.396106	0.645382
YDL128W	1358.02	-0.24214	0.0692314	-3.49755	0.000469555	0.00424277
YPL098C	592.738	-0.098786	0.10683	-0.9247	0.355122	0.613565
YMR033W	889.93	-0.0019404	0.129434	-0.0149914	0.988039	0.995816
YPR003C	275.076	-0.00695256	0.160317	-0.0433675	0.965409	0.987499
YGR262C	512.056	-0.0979251	0.0964004	-1.01582	0.309717	0.569465
YDR202C	267.851	-0.000423969	0.120231	-0.00352628	0.997186	0.999082
YGR215W	644.804	0.12851	0.11985	1.07225	0.283608	0.542596
YDR253C	78.7203	0.580917	0.213787	2.71727	0.00658226	0.0374733
YCR082W	1308.58	-0.0366518	0.0808338	-0.453422	0.650245	0.83003
YOR001W	1551.5	0.0906437	0.074207	1.2215	0.221898	0.463869
YKL088W	639.695	-0.138244	0.104552	-1.32225	0.186086	0.417522
YEL075W-A	5.05484	-0.799414	0.903265	-0.885027	0.376142	0.628892
YLR276C	2176.03	0.0805745	0.0909963	0.88547	0.375903	0.628775
YDL222C	139.951	0.741204	0.209066	3.54531	0.000392157	0.00362101
YNL140C	69.9608	-0.0850199	0.249763	-0.340402	0.733554	0.879397
YOL095C	260.599	0.0401197	0.162807	0.246425	0.805353	0.912388
YNR022C	775.169	0.0393531	0.11184	0.351868	0.724937	0.874042
YDR409W	501.17	-0.122135	0.108105	-1.12978	0.25857	0.513396
YBR221C	3513.73	-0.15938	0.0627068	-2.54167	0.0110325	0.0571502
YEL018C-A	4.58627	-0.282347	0.684133	-0.412708	0.679821	0.84643
YAL005C	15938.2	0.607125	0.143184	4.24019	2.23333e-05	0.00028537
YPL158C	475.428	-0.411956	0.105578	-3.9019	9.54408e-05	0.00105351
tG(GCC)P2	7.88949	0.163935	0.541248	0.302883	0.761979	0.894657
YJL121C	1112.56	-0.154045	0.136434	-1.12908	0.258863	0.513428
YKL008C	803.809	1.08044	0.157745	6.84926	7.42328e-12	2.79478e-10
YER158W-A	4.30047	0.296057	0.746866	0.396399	0.69181	0.854602
YBR103W	534.76	0.0857685	0.0964308	0.88943	0.373772	0.627475
YNR004W	119.426	0.535746	0.207426	2.58283	0.00979948	0.0519545
YPL032C	1863.13	-0.184317	0.0996841	-1.84901	0.0644561	0.211331
YHR064C	5840.58	-0.0444742	0.112395	-0.395696	0.692329	0.854602
YKL197C	540.836	-0.217902	0.101616	-2.14436	0.0320043	0.130095
YMR020W	425.331	0.553738	0.103565	5.34679	8.95298e-08	1.99393e-06
YDR206W	1370.79	-0.0808199	0.117007	-0.690725	0.489738	0.722298
YDR377W	1540.99	-1.49051	0.079729	-18.6948	5.46206e-78	3.14068e-75
YIR007W	343.762	-0.0366462	0.135302	-0.270848	0.786508	0.903261
YPL045W	689.936	0.166025	0.121482	1.36666	0.171732	0.398169
YLR314C	1861.49	-0.176422	0.0925284	-1.90667	0.0565629	0.193593
YFR020W	135.101	0.374326	0.151656	2.46827	0.013577	0.0674053
YNL126W	295.364	-0.200351	0.192737	-1.03951	0.298569	0.557559
YOR327C	912.068	-0.0692805	0.12347	-0.56111	0.574723	0.781915
YOL139C	3993.41	-0.0775757	0.112415	-0.690082	0.490142	0.722298
YBR207W	779.349	0.0731882	0.0992804	0.737187	0.461009	0.700777
YNL269W	18.9661	0.861837	0.376428	2.28951	0.0220496	0.0984914
YDR532C	252.519	-0.135235	0.182059	-0.742807	0.457599	0.698097
YKL210W	3142.35	0.0353445	0.0882214	0.400634	0.68869	0.852778
YER146W	364.197	-0.263046	0.153658	-1.71189	0.0869167	0.255816
YHR159W	274.546	0.109535	0.135907	0.805957	0.420268	0.666715
YPL132W	465.476	0.0666519	0.110725	0.601959	0.547202	0.76178
YIL114C	287.231	0.785795	0.116998	6.7163	1.86392e-11	6.85423e-10
YJL089W	70.0949	0.252337	0.241397	1.04532	0.295876	0.554823
YMR301C	751.009	-0.553483	0.090955	-6.08523	1.16321e-09	3.474e-08
YJL217W	1082.35	-0.433281	0.130518	-3.31969	0.00090118	0.00745093
YBL029W	216.642	0.152691	0.15397	0.991694	0.321347	0.580083
YMR188C	774.467	0.104415	0.10672	0.978401	0.327876	0.586155
YGR154C	238.985	0.618091	0.141336	4.37319	1.22441e-05	0.000170959
snR191	26.2491	-0.230841	0.344815	-0.669463	0.5032	0.731958
snR190	5.49558	0.509092	0.683889	0.744408	0.45663	0.697573
YOR389W	1335.27	0.719228	0.117994	6.09548	1.09107e-09	3.2862e-08
YLR130C	1950.42	-0.269999	0.0745069	-3.62381	0.000290294	0.00275692
YER022W	472.18	-0.0154996	0.138275	-0.112093	0.91075	0.96409
YBR140C	740.592	0.00329402	0.162047	0.0203276	0.983782	0.995269
YKR070W	499.676	-0.165691	0.130723	-1.2675	0.204978	0.441733
YGL262W	1.90682	2.70236	1.43815	1.87905	0.0602377	0.202296
YMR205C	7394.67	0.390111	0.0817049	4.77463	1.80037e-06	3.02855e-05
YNL203C	43.5063	-0.0747911	0.238691	-0.313339	0.754023	0.890315
YJL185C	335.315	0.410865	0.136646	3.00678	0.00264028	0.0183112
YNL022C	1015.96	0.0237216	0.0987844	0.240135	0.810226	0.915612
YML017W	518.84	-0.195605	0.102555	-1.90731	0.0564808	0.193417
YKR087C	466.251	-0.148124	0.0921819	-1.60687	0.108083	0.297357
[truncated: 4,330 more rows]

## Sheet: deseq.pam.8h
	baseMean	log2FoldChange	lfcSE	stat	pvalue	padj
YAL008W	562.962	0.165992	0.138248	1.20068	0.229874	0.393552
YBR255W	423.677	-0.0274881	0.11698	-0.234981	0.814224	0.887872
YGR164W	4.03553	-0.52944	0.718715	-0.736647	0.461337	0.624573
YGR131W	30.7719	0.210866	0.317807	0.663504	0.507008	0.663999
YNL003C	362.68	-0.208281	0.110493	-1.88501	0.0594285	0.151526
YBR135W	466.991	0.169175	0.139796	1.21015	0.226219	0.389128
YBR160W	781.447	-0.0669903	0.126377	-0.530085	0.596053	0.734358
YJL082W	1831.49	-0.012302	0.18376	-0.0669461	0.946625	0.97054
YJL142C	70.1588	-1.11707	0.403733	-2.76684	0.00566026	0.0258974
YPL191C	157.184	0.0495742	0.197986	0.250393	0.802283	0.880411
YGL215W	2470.9	0.119519	0.155166	0.770265	0.441142	0.609455
YKL074C	554.335	0.19451	0.118588	1.64022	0.10096	0.220104
YJL077C	2.22279	1.13029	1.10925	1.01897	0.308218	NA
YKL096W-A	20115.6	-0.252262	0.166471	-1.51535	0.129683	0.26309
YIL124W	646.872	-0.882887	0.248752	-3.54927	0.000386304	0.00291214
YPL039W	343.203	0.423009	0.114089	3.70773	0.000209128	0.00175506
YNL170W	14.3189	-0.590688	0.426573	-1.38473	0.166136	0.314174
YGL141W	540.418	0.0167644	0.187709	0.0893109	0.928835	0.960372
YJL179W	296.406	-0.0320807	0.152309	-0.21063	0.833176	0.8987
YDR316W-B	3732.53	0.473999	0.327907	1.44553	0.14831	0.28966
YKL083W	5.71925	-1.09642	0.697692	-1.5715	0.116066	0.243178
YBR152W	176.643	0.266669	0.174433	1.52878	0.126319	0.258334
YKL029C	3671.65	0.410249	0.195701	2.0963	0.0360554	0.10573
YPL166W	119.953	-0.100949	0.218645	-0.461704	0.644294	0.771375
YKL052C	360.072	0.19181	0.130431	1.47059	0.141402	0.279857
YHR025W	1330.16	-0.261003	0.143682	-1.81653	0.069289	0.169076
YOL034W	540.393	0.0484163	0.116977	0.413896	0.67895	0.796301
YBL008W	517.263	0.348882	0.131187	2.65943	0.00782728	0.0337295
YIL062C	1025.34	-0.319682	0.151717	-2.1071	0.0351088	0.103554
YOL116W	259.044	-0.274664	0.144567	-1.89991	0.0574454	0.148023
YDR196C	427.719	-0.22174	0.145104	-1.52815	0.126476	0.258483
YNL255C	2019.22	0.0382566	0.188468	0.202988	0.839145	0.902591
YNR032W	299.523	-0.0834377	0.113853	-0.732853	0.463648	0.625873
YNR045W	434.792	-0.343664	0.0967174	-3.55328	0.000380463	0.00288241
YML105C	632.409	-0.202077	0.10554	-1.9147	0.0555314	0.14423
YNL288W	541.266	-0.0982289	0.0982159	-1.00013	0.317246	0.489357
YIL059C	159.254	0.490693	0.149992	3.27145	0.00106996	0.00677193
YIL004C	361.125	-0.137704	0.133824	-1.02899	0.303485	0.476234
YNR018W	2825.97	0.210191	0.160843	1.30681	0.191277	0.348423
YPL144W	177.561	0.107002	0.213743	0.500611	0.616645	0.748973
YFR047C	714.917	-0.170622	0.133881	-1.27443	0.202511	0.362431
YER087C-B	701.495	0.0767685	0.145739	0.526755	0.598364	0.736006
YHR078W	390.713	0.0553357	0.133022	0.415988	0.677419	0.795968
YJR115W	83.1566	-0.777348	0.336514	-2.31	0.0208881	0.0700035
YLR355C	8649.95	0.00757146	0.133508	0.0567119	0.954775	0.975157
YGR099W	341.92	0.0969493	0.123335	0.786063	0.431831	0.600138
YLR300W	15024.7	0.0903716	0.138846	0.650875	0.515127	0.670619
YCL028W	1270.52	-0.288446	0.0967547	-2.98121	0.00287109	0.0150906
YJR140C	422.935	0.212308	0.127121	1.67012	0.0948948	0.211
YOR033C	603.02	0.101689	0.122576	0.8296	0.406765	0.576108
YOR062C	231.09	0.699658	0.135088	5.17928	2.22742e-07	4.07644e-06
YBR043C	895.349	0.125941	0.0937211	1.34378	0.179019	0.332331
YHR112C	821.104	0.305398	0.110823	2.75573	0.00585613	0.0265835
YLR011W	129.142	-0.0126829	0.170075	-0.0745721	0.940555	0.967137
YIL044C	392.89	0.00376313	0.127965	0.0294075	0.97654	0.990866
YNL197C	1040.95	-0.177685	0.141406	-1.25656	0.208914	0.369107
YKR103W	168.621	0.304785	0.213366	1.42846	0.153159	0.296613
YLR133W	508.143	-0.831213	0.159407	-5.21442	1.84397e-07	3.44737e-06
YER121W	76.7154	-0.442674	0.21994	-2.0127	0.0441457	0.122423
YCR046C	647.259	0.193099	0.153288	1.25971	0.207773	0.368055
YNL144C	638.382	-0.156646	0.188119	-0.8327	0.405014	0.5747
YKL204W	903.283	-0.121861	0.114981	-1.05983	0.289221	0.460363
YOR266W	275.982	-0.195493	0.110504	-1.76909	0.0768787	0.181938
YDR393W	320.506	-0.0426518	0.127574	-0.33433	0.738131	0.838195
YGL171W	868.26	0.253446	0.187599	1.351	0.176695	0.329022
YPR194C	1683.33	-1.3036	0.199707	-6.52757	6.68466e-11	2.25645e-09
YGR019W	1202.39	0.00850053	0.160509	0.0529598	0.957764	0.977225
YBL033C	2409.71	0.594781	0.143621	4.14133	3.45292e-05	0.000380761
tE(UUC)G3	1.95511	-0.549521	1.00654	-0.54595	0.5851	NA
YJL188C	19.2894	-2.1009	0.45215	-4.64646	3.3768e-06	4.86195e-05
YLL057C	78.5414	1.25544	0.230579	5.44473	5.18854e-08	1.05437e-06
YPL060C-A	16.9943	-1.15907	0.431898	-2.68367	0.00728181	0.031879
YBR296C	73.7077	0.981674	0.197406	4.97287	6.5968e-07	1.10116e-05
YNL277W	116.968	-0.259818	0.202207	-1.28491	0.198824	0.357412
YMR040W	264.966	0.539719	0.162936	3.31246	0.000924795	0.0060355
YDR077W	97947.1	-0.0249514	0.179051	-0.139353	0.889171	0.93519
YMR266W	1315.25	0.435876	0.194229	2.24414	0.0248237	0.0796525
YKR064W	418.782	-0.0227411	0.125092	-0.181795	0.855744	0.91261
YPL089C	2076.05	0.533789	0.134738	3.96169	7.44201e-05	0.000738851
YGR277C	461.07	0.210993	0.134945	1.56356	0.117922	0.245711
YDL139C	196.426	0.50779	0.140482	3.61462	0.000300786	0.00236427
YDR246W	463.179	0.0384435	0.132791	0.289503	0.772197	0.859844
YOR288C	339.009	-0.218311	0.139877	-1.56074	0.118586	0.246622
YCR028C	483.099	0.0219677	0.116722	0.188205	0.850716	0.909866
YML054C	1950.63	-2.84282	0.295872	-9.60828	7.37715e-22	5.53377e-20
YLR179C	1862.96	-0.0342702	0.160919	-0.212966	0.831353	0.897531
YOR141C	770.774	-0.151123	0.132408	-1.14134	0.253728	0.422949
YPL280W	167.227	0.499579	0.33033	1.51236	0.130441	0.264275
YBL106C	104.577	-0.581488	0.189977	-3.06083	0.00220728	0.0122591
YGL044C	401.088	-0.0137565	0.10506	-0.13094	0.895823	0.938452
YER107C	501.019	-0.165481	0.112613	-1.46947	0.141704	0.280175
YBR038W	747.627	-0.952115	0.164436	-5.79017	7.03161e-09	1.63069e-07
YER076W-A	2.50143	-0.622913	0.955662	-0.651813	0.514522	NA
YGR259C	3.03376	0.454667	0.80929	0.561811	0.574245	NA
YEL047C	1103.61	-0.160522	0.117616	-1.3648	0.172315	0.322945
YPR016C	1689.76	0.0713564	0.15237	0.468309	0.639564	0.768277
YOR208W	1063.26	0.421445	0.168823	2.49638	0.0125469	0.0480676
YDL055C	11633.7	0.225371	0.199804	1.12796	0.259337	0.42912
YML009C	398.528	-0.101809	0.141795	-0.718	0.472757	0.632982
YML072C	1998.33	-0.521324	0.137779	-3.78378	0.000154465	0.00136443
YDR142C	299.61	0.0662672	0.108824	0.608939	0.542565	0.693393
YFL044C	598.011	0.107151	0.121682	0.880582	0.378544	0.551303
RDN37-2	2.71508	4.86632	3.39761	1.43228	0.152064	NA
YEL011W	1228.18	-2.70517	0.758762	-3.56524	0.000363523	0.00276441
YKL019W	669.157	-0.0134919	0.119806	-0.112615	0.910336	0.94891
YJL130C	3336.92	0.243635	0.121934	1.99809	0.0457071	0.125267
YBL085W	1067.35	-0.106679	0.1091	-0.977809	0.328169	0.500741
YBR116C	70.0364	-1.18495	0.821388	-1.44262	0.149128	0.290694
YDR166C	564.333	0.13367	0.151197	0.88408	0.376653	0.54947
YHR212W-A	3.23941	-0.0244064	0.954314	-0.0255748	0.979597	NA
YDR082W	446.677	0.178333	0.0974152	1.83065	0.0671525	0.165496
YDR348C	1198.46	-0.0864255	0.12046	-0.717464	0.473088	0.633285
YKL182W	6021.52	-1.3158	0.116957	-11.2503	2.30799e-29	2.41782e-27
YKL018C-A	224.487	-0.160232	0.133447	-1.20071	0.229863	0.393552
YPL027W	8.29781	0.464729	0.531764	0.873938	0.382152	0.554548
YKL135C	790.633	-0.253337	0.122072	-2.0753	0.0379586	0.110089
YLR363C	96.0996	0.152592	0.173727	0.878347	0.379756	0.552802
YEL077W-A	4.16727	-0.0147518	1.13788	-0.0129643	0.989656	0.99526
YDR179C	93.1041	0.0687222	0.218699	0.314231	0.753346	0.847339
YML089C	37.2742	-1.31891	0.359674	-3.66695	0.000245459	0.00202088
YLR431C	443.95	0.512933	0.116099	4.41808	9.95832e-06	0.000128464
YKR046C	2976.25	-0.317957	0.160076	-1.98628	0.047002	0.127893
YJR005W	765.95	-0.222501	0.113519	-1.96004	0.0499915	0.133516
YJL116C	3597.61	2.52489	0.176272	14.3238	1.55309e-46	2.77546e-44
YMR030W	266.743	-0.52268	0.171399	-3.04949	0.00229228	0.012559
YER030W	730.816	-0.129843	0.172099	-0.75447	0.450567	0.61674
YIR026C	808.762	0.600335	0.199092	3.01536	0.00256674	0.0138503
YJR072C	1166.81	0.223103	0.162436	1.37348	0.169605	0.319441
YDR515W	384.491	-0.419209	0.112512	-3.72589	0.000194628	0.00165857
YKR039W	239.284	0.0982834	0.220618	0.445492	0.655964	0.780122
YGL003C	510.992	-0.207718	0.119098	-1.74409	0.081143	0.188812
YPL009C	979.127	0.0604473	0.134904	0.448076	0.654099	0.779503
YDR268W	351.353	0.0255106	0.106537	0.239453	0.810755	0.886116
YGL192W	5.84247	-0.463164	0.699765	-0.661885	0.508045	0.664131
YDL117W	928.305	-0.084372	0.138382	-0.609702	0.542059	0.692942
YMR131C	3116.89	0.39251	0.165225	2.37561	0.0175201	0.061712
YMR293C	339.882	0.0714518	0.145586	0.490788	0.623577	0.754902
YJL214W	55.3732	0.178521	0.254457	0.701574	0.482945	0.641814
YIL105C	538.837	-0.698902	0.184713	-3.78373	0.000154497	0.00136443
YML126C	2090.19	-0.584143	0.134412	-4.3459	1.38705e-05	0.000173767
YLR189C	801.32	-0.100429	0.154371	-0.650568	0.515326	0.670619
YIL150C	246.057	0.150993	0.168959	0.893671	0.371498	0.544171
YLR349W	38.1639	0.552485	0.300537	1.83833	0.0660143	0.163183
YGL250W	142.665	-0.324824	0.205334	-1.58193	0.113665	0.239552
YBR212W	1044.71	0.0782338	0.152156	0.514169	0.607134	0.742541
YJR109C	991.146	0.122698	0.0992117	1.23673	0.216189	0.377895
YLR254C	336.551	0.176617	0.114394	1.54394	0.122604	0.252865
YGR085C	6052.1	-0.257267	0.159197	-1.61603	0.106088	0.22753
YPL105C	1838.45	-0.00666148	0.109722	-0.0607122	0.951588	0.973212
YGR145W	1210.73	0.30144	0.190755	1.58025	0.114049	0.240195
YJR094C	96.3671	0.0212372	0.26245	0.0809191	0.935506	0.965049
YKL177W	18.7901	0.693851	0.384081	1.80652	0.0708367	0.172036
YGL154C	179.734	0.139207	0.142523	0.97673	0.328703	0.500999
YBR129C	214.628	-0.284779	0.129517	-2.19878	0.0278937	0.0873219
tK(UUU)D	11.0272	0.498832	0.43781	1.13938	0.254545	0.423499
YMR322C	16.7723	2.68218	0.663941	4.03979	5.35002e-05	0.000556622
YKL099C	537.615	0.331532	0.173118	1.91506	0.0554849	0.144194
YDR315C	123.187	0.184729	0.166815	1.10739	0.268125	0.437343
YLR394W	475.598	-0.73844	0.106231	-6.95126	3.62046e-12	1.40114e-10
YNL104C	3483.11	-0.422915	0.0866553	-4.88043	1.05855e-06	1.70152e-05
YNL151C	486.04	0.0545511	0.150732	0.361908	0.717421	0.826204
YNR066C	313.573	0.430584	0.263273	1.63551	0.101943	0.221375
YLR220W	814.226	-0.517885	0.135444	-3.82362	0.000131507	0.00118842
YHR006W	1359.67	0.123327	0.10231	1.20542	0.228039	0.391443
YMR232W	58.2799	0.556908	0.256172	2.17396	0.0297082	0.0910733
YNL083W	383.884	-0.134117	0.0962234	-1.39381	0.163374	0.31011
YGR038C-A	62.4569	0.589179	3.22872	0.182481	0.855206	0.912424
YGR038C-B	3072.92	0.550418	0.169965	3.23842	0.00120196	0.00744453
YMR238W	1952.9	0.223249	0.0940163	2.37457	0.0175693	0.0617772
YER168C	598.848	-0.0862455	0.0890089	-0.968954	0.332568	0.504414
YPL265W	588.201	1.85857	0.299017	6.2156	5.11282e-10	1.52282e-08
YOR227W	1172.23	-0.386491	0.240629	-1.60617	0.108237	0.230916
YOR081C	663.135	-0.0574734	0.131478	-0.437133	0.662015	0.784859
YEL026W	2850.71	0.437507	0.18747	2.33374	0.0196093	0.067049
YGR050C	17.685	-0.728215	0.355719	-2.04716	0.0406422	0.115552
YDR021W	297.108	0.399348	0.199584	2.0009	0.0454029	0.124702
YGL063W	120.338	-0.218419	0.191831	-1.1386	0.254872	0.42381
YPL212C	1478.93	0.492383	0.179865	2.73752	0.00619051	0.0277886
YOL157C	168.185	0.437172	0.179688	2.43296	0.0149761	0.0549378
YPR095C	550.001	-0.322833	0.14865	-2.17177	0.0298734	0.0915055
YOR310C	3739.52	0.248852	0.181823	1.36866	0.171107	0.321176
YDR188W	2742.26	-0.0182955	0.103184	-0.177309	0.859266	0.914984
YOL128C	231.592	0.423138	0.147058	2.87735	0.00401025	0.0197939
YGL236C	645.24	0.172981	0.126098	1.3718	0.170125	0.320123
YHR133C	428.576	0.0877497	0.154745	0.56706	0.570674	0.715078
YDR017C	985.563	0.0587156	0.126438	0.464384	0.642373	0.769833
YIL090W	804.76	0.0766197	0.125943	0.608366	0.542944	0.69349
YBR183W	325.448	-0.341194	0.257563	-1.3247	0.18527	0.341018
YOL048C	203.579	-0.921179	0.198828	-4.63304	3.60331e-06	5.13937e-05
YML039W	12.3354	0.538521	3.23997	0.166212	0.86799	0.920941
YCR007C	154.477	0.797951	0.137559	5.8008	6.5999e-09	1.5483e-07
YDR540C	117.365	0.723471	0.173109	4.17928	2.92435e-05	0.000332118
YEL004W	154.968	0.151069	0.2315	0.652566	0.514036	0.669658
YPR057W	318.883	0.00327305	0.13029	0.0251214	0.979958	0.991804
YLL032C	265.245	-0.0567335	0.153781	-0.368924	0.712184	0.822511
YDR116C	810.328	-0.0501113	0.0867791	-0.577458	0.56363	0.710207
YPL119C-A	20.8596	-0.761585	0.528951	-1.4398	0.149924	0.2915
YDR299W	1255.26	0.0784184	0.146365	0.535772	0.592116	0.731276
YLR030W	146.064	0.48239	0.152324	3.16686	0.00154093	0.00909002
YDR122W	1145.63	-0.339248	0.202908	-1.67193	0.0945382	0.210735
YOL062C	1080.8	-0.058355	0.0819772	-0.711845	0.476561	0.636672
YNL234W	346.187	0.912272	0.194632	4.68716	2.77027e-06	4.08547e-05
YLR467W	2092.73	0.193541	0.177508	1.09033	0.27557	0.444599
YJL194W	366.205	-0.515613	0.217215	-2.37375	0.0176086	0.0618081
YOL015W	106.156	0.370346	0.163399	2.26651	0.02342	0.0760555
YDL070W	2275.5	0.159713	0.137884	1.15831	0.246737	0.413907
YOR241W	620.929	0.0673452	0.0967753	0.695893	0.486496	0.644419
YLR056W	5313.69	0.194068	0.256226	0.757409	0.448805	0.615595
YMR054W	1102.13	-0.0241559	0.11618	-0.207917	0.835294	0.899778
YKL110C	922.724	0.493557	0.130509	3.78177	0.000155716	0.00137121
YML100W-A	3.05237	0.277177	0.857497	0.32324	0.746513	NA
YPR070W	424.416	0.0520538	0.144923	0.359183	0.719458	0.8273
YLR204W	582.454	0.168246	0.158842	1.05921	0.289506	0.460481
YML097C	587.604	0.244672	0.111227	2.19975	0.0278248	0.0871912
YKR007W	263.167	-0.286257	0.193047	-1.48284	0.138118	0.27551
YHR193C	3951.7	-0.430534	0.158067	-2.72374	0.00645482	0.0288379
YBL099W	7674.06	-2.22589	0.0836954	-26.5951	7.73621e-156	4.70052e-152
YJR035W	456.274	-0.0400982	0.151335	-0.264964	0.791037	0.87331
YOR126C	431.528	-0.0474992	0.120035	-0.395711	0.692318	0.80693
YMR023C	303.512	0.25173	0.128266	1.96256	0.0496974	0.132906
YOR119C	1255.1	0.146041	0.110991	1.31579	0.188244	0.344717
YNL196C	7.89591	1.1089	0.575929	1.92542	0.0541767	0.141819
YNL187W	354.298	0.918968	0.149836	6.13317	8.61446e-10	2.45735e-08
YMR141C	9.14509	-1.39599	0.568131	-2.45716	0.0140039	0.0520731
YLL014W	425.25	-0.374853	0.161497	-2.32111	0.0202811	0.0684599
YCR061W	318.144	-0.208424	0.245475	-0.849061	0.395847	0.566188
YPR115W	901.719	-0.527642	0.186342	-2.83158	0.00463184	0.0222299
YHR088W	919.338	0.322252	0.197706	1.62995	0.103111	0.222759
YBR017C	916.812	0.141851	0.0985855	1.43886	0.150189	0.291922
YPR162C	312.638	0.0773127	0.131663	0.5872	0.55707	0.70507
YGR166W	784.711	0.46872	0.117737	3.98109	6.8599e-05	0.000683291
YDL161W	796.079	-0.0128035	0.120053	-0.106649	0.915068	0.952373
YKL050C	247.373	0.143583	0.250323	0.573592	0.566244	0.711724
YJR055W	123.014	0.384876	0.217861	1.76661	0.0772936	0.182421
YGL099W	979.409	0.0437379	0.14208	0.30784	0.758204	0.850757
YFL030W	1148.02	-1.97673	0.142723	-13.8501	1.26996e-43	2.08548e-41
YIL119C	152.676	0.156845	0.359502	0.436283	0.662631	0.78513
YPL193W	630.717	0.272411	0.1139	2.39167	0.0167718	0.0596287
YNL005C	1198.86	-0.0970255	0.0765207	-1.26796	0.204811	0.364722
YJL144W	140.065	0.926297	0.211549	4.37864	1.19423e-05	0.000151485
YBR012W-B	18.8911	-0.451624	1.51965	-0.29719	0.766322	0.854971
YJR139C	1994.65	-0.440536	0.0920864	-4.78394	1.71891e-06	2.66431e-05
YBR133C	615.729	-0.141165	0.107122	-1.31779	0.187574	0.343904
YBR162C	3799.92	-0.832098	0.149873	-5.55204	2.82354e-08	6.04079e-07
YNL331C	258.95	0.454239	0.125452	3.62082	0.000293676	0.00232103
YJL079C	2913.59	0.168771	0.116837	1.4445	0.148599	0.289944
YGL019W	825.237	-0.00297655	0.117909	-0.0252445	0.97986	0.991804
YGR201C	402.846	0.792437	0.205696	3.85248	0.000116929	0.00107563
YNL172W	443.256	-0.0122779	0.129934	-0.0944934	0.924717	0.958312
YNL058C	890.024	0.0565362	0.112229	0.503758	0.614431	0.748003
YPL160W	2295.16	0.0472077	0.15065	0.31336	0.754007	0.847921
YNL023C	870.072	0.544356	0.167053	3.25858	0.00111972	0.00701385
YDR214W	1842.84	0.651007	0.165378	3.93647	8.26873e-05	0.000805141
YLR222C	1537.95	0.174661	0.161458	1.08177	0.279355	0.4488
YLR295C	1858.83	-1.75974	0.112576	-15.6315	4.44049e-55	1.17306e-52
YER175W-A	2.14524	0.135011	0.983342	0.137298	0.890795	NA
YHR168W	313.223	-0.032078	0.134042	-0.239313	0.810863	0.886116
YOR064C	328.401	-0.854709	0.139639	-6.12084	9.30851e-10	2.64292e-08
YOR159C	243.489	0.133237	0.205192	0.649328	0.516126	0.67134
YOL081W	778.774	0.0322021	0.178803	0.180098	0.857075	0.913688
YOL036W	1515.3	0.24328	0.108308	2.24619	0.0246921	0.0794224
YGL148W	2064.32	-0.250813	0.165863	-1.51217	0.13049	0.264286
YOR031W	322.154	0.859165	0.251622	3.41451	0.00063897	0.00442689
YBR282W	464.643	0.272081	0.126231	2.15543	0.0311285	0.0947105
YDR194C	1749.54	0.0612651	0.10588	0.578626	0.562842	0.709507
YOL114C	41.3069	0.113679	0.240058	0.473547	0.635823	0.765535
YGR084C	775.344	-0.149257	0.0976121	-1.52908	0.126244	0.258334
YNR030W	593.763	-0.119662	0.13037	-0.917864	0.35869	0.5326
YML007C-A	6.69923	0.274125	0.652919	0.419846	0.674598	0.794506
YBR018C	40268.9	-0.176979	0.113609	-1.55779	0.119283	0.247529
YKL076C	94.4168	-0.039328	0.196958	-0.199677	0.841733	0.903394
YDR466W	869.391	0.0318456	0.157619	0.202041	0.839885	0.902623
YFR045W	304.281	-0.13241	0.163747	-0.808629	0.418729	0.587826
YIL002C	567.071	0.0203875	0.10614	0.192081	0.847678	0.907736
YGR159C	13897.2	0.770617	0.20734	3.71668	0.000201857	0.00170582
YLR369W	594.501	-0.120907	0.113696	-1.06343	0.287587	0.458389
YFR032C	60.6673	-1.27203	0.38578	-3.2973	0.00097618	0.00632103
YNL118C	1073.48	-0.191166	0.115186	-1.65963	0.096989	0.213749
YGL228W	1154.45	-0.215361	0.107742	-1.99885	0.045625	0.125155
YJR117W	1137.18	-0.163941	0.131434	-1.24732	0.212279	0.3731
YBR196C-A	6.1662	0.696075	0.572064	1.21678	0.223689	0.386586
YBR196C-B	5.87851	-1.17506	0.60477	-1.94298	0.0520183	0.137539
YIL030W-A	41.012	-0.0773514	0.230866	-0.335048	0.737589	0.838109
YLR357W	833.13	-0.129772	0.0924305	-1.404	0.160319	0.306417
YER127W	1061.43	0.337138	0.169192	1.99264	0.0463011	0.126552
YBL015W	1903.23	-2.7894	0.205044	-13.6039	3.79738e-42	5.91613e-40
YLR017W	1074.62	0.514884	0.138953	3.70546	0.000211006	0.00176837
YHR110W	753.572	-0.0553586	0.128425	-0.431059	0.666426	0.788243
YBR041W	631.11	-0.272883	0.114903	-2.3749	0.0175538	0.0617584
YOR394W	8.61927	-0.104798	0.566019	-0.185149	0.853112	0.911306
YDL220C	304.537	0.115774	0.151237	0.765517	0.443964	0.611796
YDL039C	2377.14	0.638497	0.51126	1.24887	0.211712	0.372427
YKL202W	8.082	0.384649	0.544483	0.706448	0.47991	0.639599
YGR122C-A	3.23996	-0.590767	0.874197	-0.675783	0.499178	NA
YOR264W	704.004	-0.502051	0.235088	-2.13559	0.0327127	0.0983776
YNL042W-B	3.95416	-0.260737	0.79298	-0.328807	0.742302	0.840677
YBL029C-A	344.361	-0.307903	0.162268	-1.89749	0.0577627	0.148526
YOR008W-B	17.3973	-0.129329	0.373998	-0.3458	0.729493	0.83462
YOR366W	16.3591	-0.315765	0.363666	-0.868284	0.385239	0.556143
YNL275W	274.761	0.080009	0.159464	0.501737	0.615853	0.748893
YAR015W	723.24	-0.581722	0.293422	-1.98255	0.0474182	0.128679
YOR384W	5.23428	-0.348557	0.685797	-0.508252	0.611277	0.74539
YLL051C	737.784	0.37029	0.134074	2.76183	0.00574778	0.0262189
YDR427W	696.151	-0.215902	0.143762	-1.50181	0.133147	0.268494
YLR079W	969.007	-0.207165	0.12687	-1.63289	0.102493	0.22212
YLR408C	92.0795	-0.333197	0.204111	-1.63243	0.102588	0.22212
YMR093W	1290.09	0.0790449	0.140595	0.562216	0.573969	0.717451
YDR079W	264.564	0.0997344	0.132324	0.753714	0.451021	0.616842
YMR268C	256.199	0.129554	0.1662	0.779503	0.435684	0.603973
YML070W	1229.64	-0.0931006	0.140607	-0.662133	0.507886	0.664131
YHR175W-A	16.1562	-0.252904	0.456192	-0.554381	0.579318	0.722187
YPR072W	753.325	-0.0723566	0.0983346	-0.735821	0.46184	0.624639
YMR108W	4927.23	0.105491	0.161285	0.654063	0.513071	0.668544
YCR091W	290.292	-0.337565	0.303018	-1.11401	0.265275	0.434647
YER062C	4562.4	1.31633	0.141691	9.29017	1.54045e-20	1.03998e-18
YDR244W	628.315	-0.112455	0.103576	-1.08572	0.277601	0.44681
YER189W	102.674	0.503415	0.297134	1.69424	0.0902198	0.20401
YDL137W	2972	-0.0643662	0.0997294	-0.645409	0.518662	0.673835
YGR271W	516.157	-0.0198596	0.129541	-0.153307	0.878156	0.927298
YDR233C	5066.42	-0.219258	0.108359	-2.02345	0.0430265	0.12047
YGR071C	302.546	0.101728	0.233077	0.436456	0.662506	0.78513
YCR106W	66.8156	-0.486932	0.222833	-2.18519	0.0288751	0.0893759
YBL100C	1.35432	-2.14885	1.3627	-1.5769	0.114817	NA
YER109C	456.083	0.0448758	0.10297	0.435813	0.662973	0.785382
YDR489W	324.748	0.368792	0.166579	2.21392	0.0268344	0.0847874
YPR049C	575.108	0.26228	0.102374	2.56199	0.0104074	0.0417394
YDL057W	247.341	0.516466	0.146993	3.51353	0.000442196	0.00323319
YGR257C	655.137	0.169499	0.120334	1.40857	0.158964	0.304305
YEL045C	9.07442	-0.144478	0.471965	-0.306119	0.759514	0.851636
YPL235W	1037.42	-0.100391	0.093558	-1.07304	0.283254	0.453745
YLR122C	28.87	0.369581	0.33637	1.09873	0.271884	0.441229
YBL087C	3387.37	-0.244472	0.186379	-1.31169	0.189624	0.346408
YJL132W	484.374	-0.203588	0.255085	-0.798119	0.424801	0.593242
YGL190C	710.698	-0.225201	0.185774	-1.21223	0.225424	0.388519
YBR110W	530.684	-0.459823	0.122127	-3.76512	0.000166467	0.00145324
YDR144C	488.241	-0.675879	0.14506	-4.65932	3.17256e-06	4.60059e-05
YFL046W	343.902	-0.192653	0.125677	-1.53292	0.125295	0.256932
YOR103C	249.062	-0.087576	0.216681	-0.40417	0.686087	0.801748
YKL137W	469.52	-0.0822818	0.159493	-0.515897	0.605926	0.741729
YDR447C	4830.44	-0.553686	0.170017	-3.25664	0.00112738	0.00704728
YGL009C	1595.72	-0.837206	0.15236	-5.49492	3.90884e-08	8.10254e-07
YPR145W	2861.99	-0.655413	0.145117	-4.51644	6.28883e-06	8.51023e-05
YJL063C	799.483	-0.207335	0.129673	-1.59891	0.109841	0.233436
YMR149W	844.885	-0.306326	0.0909883	-3.36665	0.000760868	0.00516242
YIR010W	481.53	-0.0168464	0.0927264	-0.181678	0.855835	0.91261
YDR331W	510.86	-0.182507	0.0928581	-1.96544	0.0493629	0.132293
YJL114W	4.85333	0.268793	0.746914	0.359871	0.718943	0.827149
YKR044W	600.978	0.274059	0.167717	1.63405	0.102248	0.221877
YLR433C	394.751	-0.0189081	0.120465	-0.156959	0.875277	0.926029
YMR068W	258.605	0.138042	0.141748	0.973854	0.330129	0.501717
YLR157C-B	45.7942	-0.21188	1.76626	-0.11996	0.904515	0.945113
YNL164C	385.533	-0.000234714	0.103249	-0.00227327	0.998186	0.999106
YER032W	482.869	-0.556435	0.114098	-4.87681	1.07817e-06	1.72393e-05
YJR070C	2295.05	0.355113	0.224914	1.57888	0.114363	0.24069
YGL005C	752.348	0.464059	0.111743	4.15292	3.28254e-05	0.000363955
YHR043C	1312.97	-0.123087	0.105309	-1.16882	0.242476	0.409019
YDL111C	932.109	0.238443	0.114607	2.08052	0.037478	0.109007
YMR133W	9.50374	0.190547	0.567195	0.335947	0.736911	0.838007
YPL007C	258.557	-0.470609	0.125992	-3.73522	0.000187549	0.00160868
YKL159C	180.523	0.499998	0.176107	2.83917	0.00452315	0.021829
YDR507C	1153.02	-0.286391	0.14756	-1.94085	0.052277	0.138051
YLR138W	1663.91	0.155246	0.084573	1.83565	0.0664095	0.163959
YBR101C	732.27	0.0531093	0.0946823	0.560921	0.574852	0.717944
YLR396C	341.024	0.00416908	0.145415	0.0286702	0.977128	0.990866
YBR245C	790.162	0.0614067	0.121177	0.506751	0.61233	0.746342
YJL216C	143.453	1.04188	0.209184	4.9807	6.33542e-07	1.06632e-05
YBR210W	158.616	-0.448939	0.142168	-3.15781	0.00158962	0.00932288
YPL103C	383.207	0.114621	0.115889	0.989056	0.322636	0.495284
[truncated: 5,955 more rows]
