# Supplementary material for: Cytosolic aggregation of mitochondrial proteins disrupts cellular homeostasis by stimulating the aggregation of other proteins
Source: bioRxiv preprint, doi:10.1101/2021.05.02.442342, version 2 (2021-07-09)
Supplement: Figure 2 - Source Data 3 [file 442342_file18.xlsx]

## Sheet: ripev.1h
	A_rip1h	B_rip1h	C_rip1h	D_rip1h	A_ev1h	B_ev1h	C_ev1h	D_ev1h
YAL008W	817	687	593	616	713	565	641	437
YBR255W	641	507	679	775	509	617	669	498
YGR164W	9	2	2	6	3	4	4	0
YGR131W	86	88	71	103	75	75	83	66
YNL003C	973	938	841	936	804	1001	957	673
YBR135W	622	536	491	471	613	522	517	342
YBR160W	1189	969	941	883	981	958	925	739
YJL082W	1542	988	870	1414	1223	1085	881	875
YJL142C	445.151	196.135	154.787	228.097	379.396	177.217	191.882	187.288
YPL191C	246	144	240	273	265	205	318	190
YGL215W	1908	1667	3249	3439	1639	2222	3505	2354
YKL074C	839	672	1003	923	616	835	1098	664
YJL077C	23	11	19	4	34	11	13	11
YKL096W-A	60549	61212	58494	51172	55985	63687	53716	38490
YIL124W	2558	2051	1549	1844	2349	1875	1587	1304
YLR364C-A	0	0	0	0	0	1	0	0
YIL171W	1	0	0	0	1	1	1	0
YPL039W	390	349	361	374	347	372	331	250
YNL170W	12.046	12.045	43.149	45.143	13	24.142	43	30
YGL141W	848	611	937	809	695	668	927	668
YJL179W	315	291	298	332	252	341	292	214
YDR316W-A	0	0	0	0	0	0	0	0
YDR316W-B	1268.73	350.692	253.631	777.52	1048.86	631.23	677.749	0
YKL083W	2.004	2.004	4.02	4.012	0	3.004	4.006	3.01
YBR152W	220	231	246	303	165	250	239	221
YKL029C	1181	977	1580	1250	785	1408	1172	901
YPL166W	292	183	214	257	282	197	273	187
YKL052C	636	530	586.921	487.918	515	600	456	420.933
YHR025W	3889	3370	3301	3438	3131	3585	3170	2384
YOL034W	441	421	722	692	321	595	725	491
YBL008W	465	380	565	538	385	508	511	411
YIL062C	2881	2628	1689	1956	2646	2349	1744	1334
YCL023C	0	0	0	0	0	1	2	1.033
tC(GCA)P1	0	1	2	0	0	0	0	0
YOL116W	600	443	487	468	538	540	488	377
YDR196C	1030	937	742	753	971	954	785	591
YNL255C	3422	3802	3640	3495	2842	3705	3420	2459
YNR032W	872	858	697	695	837	879	753	488
YNR045W	788	616	517	675	687	675	557	524
YML105C	1190	1152	1188	1111	1001	1250	1212	854
YNL288W	973	806	809	784	807	910	725	583
YIL059C	208.986	150.983	148.967	173	188.977	157	121	115
YIL004C	550	486	402	411	397	506	331	280
YNR018W	2519	3542	2599	2744	2282	3725	2755	1983
YPL144W	278	265	238	203	252	283	194	191
YFR047C	1752	1809	1330	1577	1688	1614	1404	976
YER087C-B	1245	1229	1108	1089	1268	1282	1241	780
YHR078W	841	561	819	951	686	732	919	664
YIR023C-A	2	0	0	1	1	1	2	3.128
YJR115W	257	100	65	69	298	94	81	46
YLR355C	7318	10269	11057	9698	4455	11460	9197	7127
YGR099W	665	376	527	448	502	433	447	324
YLR300W	6099	5878	6820	6849	4341	7224	6087	4790
YCL028W	2496	2263	1970	2060	2245	2417	2127	1414
YJR140C	563	343	732	774	372.312	502	750	554
YOR033C	550	474	575	574	424	614	589	473
YOR062C	154	138	130	151	180	137	150	114
YBR043C	1325	1215	1288	1547	921	1522	1291	1104
YHR112C	1037	669	576	515	823	561	630	383
YLR011W	257	242	186	208	251	243	198	166
YIL044C	827	838	881	873	901	947	1014	687
YNL197C	1451	1144	1629	1816	1061	1564	1635	1291
YKR103W	192	134	253	289	153	180	276	224
YLR133W	1784	1279	1441	1585	1378	1490	1693	1178
YER121W	79	64	54	50	95	70	68	34
YCR046C	771	938	582	640	658	746	510	396
YNL144C	2440	1166	954	1508	2200	1191	1204	1050
YKL204W	1383	1202	1323	1425	1118	1177	1296	966
YOR266W	382	419	469	532	371	405	444	327
YDR393W	405	350	417	424	279	434	434	313
YGL171W	459	460	854	812	244	660	785	645
YPR194C	3294	1888	3455	3025	2336	3021	3942	2563
YGR019W	2066	1856	1454	1555	1884	1820	1475	1139
YBL033C	2002	1352	1206	1192	1675	1473	1267	874
tE(UUC)G3	3	2	5	5	0	3	4	0.5
YJL188C	18.003	22.004	8.001	9.002	26.007	22.005	10.001	12.003
YLL057C	194	134	138	120	149	141	147	138
YPL060C-A	22.962	13.934	14.856	13.322	13.106	16.701	15.689	22.657
YBR296C	263	176	324	243	231	239	330	222
YNL277W	130	120	132	70	118	115	101.339	70
YMR040W	532	456	338	324	462	455	467	215
YDR077W	65328	37390	40251	35185	51364	38878	38731	28990
YMR266W	4246	2905	4419	4061	3019	4096	5072	3185
YKR064W	578	376	827	877	369	521	784	620
YPL089C	1391	1054.4	1137	1531	1123	1163	1304	966
YGR277C	713	579	549	501	523	598	532	349
YDL139C	169	133	131	128	122	124	104	109
YDR246W	894	733	596	627	792	649	602	445
YOR288C	1984	845	1269	1122	1763	1098	1684	764
YDL240C-A	0	0	0	0	0	0	0	0
YCR028C	606	607	775	857	484	838	784	626
YML054C	986	616	434	529	1083	601	498	329
YLR179C	2653	2798	2375	2541	2340	2703	2264	1699
YOR141C	1023	975	1245	1302	846	1216	1373	949
YPL280W	36.311	28.198	29.336	33.85	38	44.225	35.167	28.215
YBL106C	422	416	554	681	284	546	570	444
YGL044C	536	549	545	527	430	596	464	409
YER107C	840	887	716	757.964	712	913	729	563
YBR038W	1874	1049	1638	1719	1445	1387	1739	1253
YER076W-A	1	5	11	4	4	3	8	6
YGR259C	30.108	11	10.018	21.131	13	17.026	15.024	11.024
YEL047C	1667	1552	1229	1383	1388	1533	1210	925
YPR016C	1823	2236	2625	2605	1571	2548	2592	1815
YOR208W	770	520	1051	1248	564	697	1145	820
YDL055C	27980	25700	30201	27996	23291	28419	31667	18173
YML009C	441	535	383	521	397	476	398	299
YML072C	4649	3048	4317	4447	3471	3833	4832	3123
YDR142C	574	470	459	577	552	618	586	414
YFL044C	1105	987	823	863	847	754	659	541
RDN37-2	20.886	0	0	0	0	0	0	0
YEL011W	9006	3498	2266	3645	10345	2902	3073	2740
YKL019W	1608	1508	1238	1243	1535	1434	1319	931
YJL130C	8382	5440	10557	12190	4874	7525	9846	7336
YBL085W	2569	1836	2120	2159	1894	2304	2204	1498
YBR116C	30.956	31.014	31.018	22.775	29.084	33.191	29.089	30.009
YDR166C	778	504	1068	1207	573	734	1221	867
YHR212W-A	2	1	1	0	0	0	0	2
YDR082W	390	383	518	486	340	438	515	401
YDR348C	1848	1600	1430	1594	1587	1875	1770	1224
YKL182W	14166	11176	19864	22034	9302	15150	22495	13390
YDR445C	0	1.021	2.046	0	0	0	1.015	0
YKL018C-A	292	305	245	269	313	325	255	194
YPL027W	6	16	11	5	3	7	5	12
YKL135C	1338	1085.97	1706.92	1710.83	1269	1486	1868.9	1314.9
YLR363C	171	137	336	355	134	183	294	213
YEL077W-A	2.083	3.84	6.144	4.206	4.803	0	0	0
YDR179C	52	41	173	122	45	62	122	98
YML089C	10	20	8	7	10	13	14	22
YLR431C	405	278	434	356	352	367	436	259
YKR046C	1592	1539	983	1185	1584	1417	982	783
YJR005W	1527	1111	1657	1961	1204	1463	1955	1318
YJL116C	727	1437	1609	1321	665	1216	1286	824
YMR030W	512	430	517	484	509	487	508	358
YER030W	1574	1433	928	1029	1245	1335	933	656
YIR026C	746	696	867	817	594	739	823	652
YJR072C	1953	1819	1847	1585	1609	1595	1688	1118
YDR515W	308	304	547	509	249	395	488	295
YKR039W	10681	8215	7922	5805	7165	10120	7916	4770
YGL003C	877	879	810	967	785	869	831	645
YPL009C	1414.46	1507.26	2170	1782	1461	1402	2243	1290.21
YDR268W	347	318	371	405	298	366	302	264
YGL192W	3	5	6	5	2	6	8	5
YDL117W	667	562	804	766	477	798	906	657
YMR131C	1920	1658	2593	2231	1308	2212	2298	1793
YMR293C	350	290	352	348	329	300	324	322
YJL214W	20	12	16	20	13	17	10	9
YIL105C	1297.62	779.273	1084.94	1176.64	1108	913.25	1215.33	857.37
YML126C	2885	3099	3660	3590	2637	3668	3884	2600
YLR189C	1501	800	1131	944	1316	1042	1183	839
YIL150C	141	122	159	185	93	200	204	142
YLR349W	65	35.134	39	42	98.209	56.108	53.141	21.158
YGL250W	437	349	277	243	355	315	319	209
YBR212W	2815	2016	2127	2289.56	2400	2376.62	2256	1657
YJR109C	3141	2176	4572	4776	2027	3293	3838	3235
YLR254C	484	337	262	306	409	346	322	189
YGR085C	6458.44	7590.12	6099.78	6401.56	5527.79	7833.75	5979.72	4575.01
YPL105C	2436	2457	2619	2853	1792	2971	2520	2011
YGR145W	815	761	1497	1271	573	992	1364	1014
YJR094C	100	60	189	150	116	93	163	96
YKL177W	7	8	12	9	4	14	16	4
YGL154C	281	221	206	247	263	255	188	148
tK(UUU)Q	0	0	0	0	0	0	0	0
YBR129C	895	777	986	1082	722	919	1017	682
tK(UUU)D	10	7	6	4	6	4	2	6
YMR322C	0	2.071	6.35	5.755	1.654	2.466	0	0
YKL099C	424	461	649	602	237	560	523	437
YDR315C	142	110	193	212	112	143	223	133
YLR394W	479	371	487	542	386	513	503	398
YNL104C	6153.74	4121.74	4497.67	4663	4794.77	4719.7	4483	3290
YNL151C	610	597	767	792	462	665	697	559
YNR066C	89	74	127	155	81	104	123	121
YLR220W	1349	1103	1111	1031	1164	1252	1084	792
YHR006W	1622	1102	1186	1139	1256	1246	1164	850
YMR232W	43	28	100	89	52	59	135	77
YNL083W	582	615	593	599	516	691	571	514
YGR038C-A	0	0	0	0	0	0	0	0
YGR038C-B	2022.09	927.654	2266.17	2182.65	1279.57	1766.6	3301.77	1654.62
YMR238W	2724	2668	2686	3150	2265	2870	2707	1915
YER168C	780	717	875	809	740	865	939	586
YPL265W	1547	1234	1135	1172	1074	1727	1249	741
YOR227W	2488	1346	1897	2170	1924	1698	2102	1642
YOR081C	1723	905	1101	1124	1286	1257	1301	837
YEL026W	1804	2447	3314	3276	1442	3016	2949	2164
YGR050C	107	46	40	58	92	56	45	35
YDR021W	105	115	347	241	65	205	265	192
YGL063W	366	373	336	305	238	378	330	261
YPL212C	562	937	1725	1436	420	1345	1412	1148
YOL157C	172.237	131.742	130.155	198.667	128.002	128.618	132.703	88.868
YOR345C	4	1	1	1	3	5	4	3.062
YPR095C	952	713	1051	1195	746	935	1156	823
YOR310C	2615.82	3403.64	5435.21	5275.86	1847.1	4294.71	4939.56	3522.03
YDR188W	5785	4836	4853	4802	4349	4887	4733	3157
YOL128C	168	179	191	184	134	218	183	150
YGL236C	400	505	561	621.996	265.979	587	447	400.974
YHR133C	962	973	1046	1069	781	1120	1105	693
YDR017C	1151	1049	1574	1568	832	1349	1526	1177
YIL090W	771	772	1119	1258	551	957	1117	842
YBR183W	498	250	162	238	500	226	181	176
YOL048C	1302	897	775	861	1277	941	824	619
YML039W	51.393	0	53.344	0	18.274	0	19.259	0
YCR007C	630	767	746	884	463	743	864	638
YDR540C	194	59	85	71	178	88	159	72
YEL004W	178	156	324	387	175	206	347	232
YPR057W	709	633	625	640	538	624	587	503
YLL032C	359	214	533	571	256	378	531	385
YDR116C	958	834	678	867	783	745	578	564
YPL119C-A	16	8	81	68	11	11	55	43
YDR299W	233	377	1022	743	116	697	700	625
YLR030W	53	44	45	48	59	46	43	40
YDR122W	2455	1757	1950	2188	1912	1922	2005	1526
YOL062C	1908	1976	1657	1975	1501	2126	1648	1283
YNL234W	256	183	230	307	239	248	304	205
YLR467W	1703.23	2005.53	2011.03	2535.22	1691.61	3266.66	2523.54	1875.02
YJL194W	123	128.978	231	236	118	186	190	211
YOL015W	246	176	254	462	178	255	330	253
YDL070W	6450	4027	6084	6981	4359	4830	6331	4237
YOR241W	851	862	986	1071	666	1063	999	777
YLR056W	4610	6766	6245	7002	3457	8293	5430	4379
YPR039W	0	3	1	1	1.546	1	2	0
YMR054W	2681	1886	2499	2756	2088	2256	2875	1869
YKL110C	893	544	723	690	637	666	685	485
YML100W-A	6	3	2	0	6	3	2	2
YPR070W	406	388	713	794	324	474	768	607
YLR204W	704	857	626	688	597	691	548	440
YML097C	567	498	670	681	457	701	706	470
YKR007W	800	747	575	640	689	703	542	423
YDL096C	4.056	3.046	4.027	1.009	4.021	6.077	4.022	2.018
YHR193C	10078	9515	8195	7957	8388	8784	7763	5344
YBL099W	13873	11928	11193	11880	13993	15325	14492	10493
YJR035W	491	406	448	487	437	416	577	380
YOR126C	314	298	288	264	328	317	311	196
YMR023C	399	334	407	397	299	330	357	282
YOR119C	1067	866	1496	1661	867	1162	1471	1196
YNL196C	3	5	4	10	9	2	3	13
YNL187W	228	240	246	267	225	258	200	234
YMR141C	2	3	6	3	7	8	4	0
YLL014W	587	634	522	543	566	745	526	358
YBL062W	0	0	0	0	1	2.037	1	0
YCR061W	502	210	229	215	374	296	223	191
YOR199W	3.453	0	2	3	0	1	2.865	4
YPR115W	2237	1718	2042	2067	1976	2031	2323	1589
YHR088W	568	619	1086	971	455	771	939	697
YBR017C	1202	863	1380	1251	942	1151	1339	1040
YPR162C	419	306	443	424	416	374	455	316
YGR166W	403	416	694	839	318	612	795	575
YDL161W	2164	1665	1429	1586	1672	1767	1568	1216
YKL050C	289	197	309	274	178	276	278	210
YJR055W	63	53	140	120	54	84	104	82
YGL099W	940	904	1542	1434	631	1231	1473	1009
YFL030W	1082	970	841	621	1352	1288	1202	838
YIL119C	559	125	403	194	319	174	481	251
YPL193W	431	436	748	627	359	549	743	505
YNL005C	1577	1409	1423	1568	1315	1412	1393	1038
YGL217C	0	1	0	0	1	0	1	0
YJL144W	1705	815	471	484	1547	401	344	270
YBR012W-B	387.627	334.279	380.068	583.328	279.74	352.727	328.925	442.603
YLR379W	2.012	2.009	2.009	4.012	2.009	2.009	4.02	3.015
YJR139C	4146	4408	4903	5095	4251	5132	5316	3358
YBR133C	1458	915	1078	1098	1079	1116	1201	867
YBR162C	20764	21841	21260	23353	16836	25051	22887	14441
YNL331C	252.033	283.517	251.411	225.391	247.221	265.963	253.435	191.639
YJL079C	8190	7769	8037	7497	6412	7391	6657	5059
YGL019W	1569	1447	1174	1172	1337	1423	1115	823
YGR201C	429	468	333	320	480	429	347	263
YNL172W	621	426	832	801	459	607	911	588.961
YNL058C	890	338	366	405	717.82	378	409	325
YPL160W	3322	2686	4540	4629	2205	3654	4390	3440
YOL083C-A	0	0	0	1	0	1	0	0
YNL023C	732	707	1021	1005	475	790	899	703
YDR214W	10219	3206	2523	2272	8462	1924	1663	1246
YLR222C	510	902	1708	1607	284	1388	1543	1324
YLR295C	2370	1830	1629	1608	2383	2328	2050	1553
YER175W-A	0	2	4	5	0	0	11	5
YHR168W	336	346	387	319	308	368	304	264
YOR064C	546	344	353	383	381	463	347	298
YOR159C	410	414	372	357	375	428	307	249
YOL081W	1191	852	2293	2388	846	1199	2424	1557
YOL036W	2021.79	1739.94	1859.93	1966.96	1460.88	2092	1815.92	1371
YGL148W	4304	4123	4148	4401	3775	4351	4173	2905
YOR031W	578	347	176	185	548	318	258	164
YBR282W	504	532	444	487	443	491	361	345
YDR194C	1499	1711	2741	2825	1137	2161	2466	1889
YOL114C	116	80	64	78	96	100	105	67
YGR084C	713	761	728	882	534	838	674	521
YNR030W	1319	743	1235	1092	1137	1093	1411	868
YAL037C-A	1	2	3	5	0	2	2	2
YML007C-A	7	3	8	6	13	6	9	8
YBR018C	100581	64028	59938	73736	82738	71372	63256	42194
YKL076C	185.683	108.221	110.234	110.479	131.173	130.089	98.597	73.584
YDR466W	964	725.798	898	1085.56	728	798	980	784
YFR045W	503	459	326	413	494	484	368	329
YIL002C	682	562	927	821	569	827	934	664
YGR159C	2180	5542.99	8551.99	8989	1224	7222.99	7275.99	6369.99
YLR369W	863	718	742	788	798	773	819	648
YFR032C	8	26	19	18	6	33	21	13
YNL118C	2052	1468	2209	2247	1789	1865	2279	1622
YGL228W	3033	2394	2385	2577	2370	2715	2771	1817
YJR117W	3265	2283	3077	3126	2770	2598	2960	1971
YBR196C-A	10	10	24	18	2	18	20	9
YBR196C-B	14	11	14	10	4	19	15	11
YIL030W-A	47.517	63.074	49.214	56.14	56.533	58.214	47.066	39.257
YLR357W	1183.98	1077	1443	1455	929	1414	1388	1022
YER127W	175	381	633	422	127	472	442	332
YBL015W	1744	1545	1256	1394	2111	1813	1649	1392
YLR017W	1090	1019	1061	961	865	1071	992	682
YHR110W	1100	1109	889	1001	1065	1126	939	652
YBR041W	1393	1240	1548	1716	1182	1541	1759	1311
YOR394W	13.427	12.769	23.21	27.428	9.147	24.843	38.399	15.63
YCL068C	0	0	0	0	0	0	0	0
YDL220C	358	271	384	381	296	356	384	265
YDL039C	382	573	819	1180	298	1011	865	917
YKL202W	26.097	13	10	9	16	21	13	8.049
YGR122C-A	4.471	5.919	21.515	22.891	4.283	13.923	27.807	12.594
YOR264W	735	684	718.991	842	666	894	805	599
YNL042W-B	2	3.079	3	0	3	3	4	0
YBL029C-A	1028	464	383	292	1034	518	439	259
YOR008W-B	20	13	13	20	9	23	20	17
YOR366W	37	20	32.992	17.959	32	25	38	16
YNL275W	299	281	486	504	229	389	465	365
YAR015W	5620	3830	4580	3744	4857	4392	5212	3199
YOR384W	131	108	121	204	85	131	90	106
YLL051C	1236	1006	1353	1610	933	1322	1324	1013
YDR427W	1287	1269	2822	2866	1107	1420	2800	1929
YLR079W	2191	1789	1367	1414	1762	1806	1454	1105
YLR408C	123	90	115	86	113	110	110	66
YMR093W	307	603	1037	799	184	874	755	597
YBR221W-A	0	1	0	0	0	0	0	0
YDR079W	299	284	267	312	282	255	313	207
YMR268C	175	139	323	257	178	227	271	224
YOR169C	0	0	0	1.002	0	0	3.004	1.002
YML070W	3045	2606	2533	2648	3177	2722	2729	1877
YHR175W-A	61	45	167	191	31	53	190	140
YPR072W	1737	1277	1860	1952	1430	1657	2077	1438
YMR108W	6089	4580	5612	5360	4153	5298	4800	3673
YCR091W	1109	451	367	524	1109	383	481	382
YER062C	793	1087	783	1038	840	1075	804	629
YDR244W	828	653	828	820	614	809	824	634
YER189W	57.129	81.559	82.345	116.909	66.742	46.193	132.681	73.125
YJL009W	1.003	0	0	0	1	1.003	1.005	1.007
YDL137W	7182.56	6823.37	5634.9	6022.91	6528.6	7045.49	5946.42	4072.96
YGR271W	801	576	1147	1203	596	903	1328	858
YDR233C	6860	6589	6526	7439	5956	7818	7157	5068
YGR071C	351	249	758	774	268	409	722	598
YCR106W	197	215	384	438	182	296	451	299
YBL100C	1	0	3.007	1.002	3.01	0	4.016	5.016
YER109C	755	625	797	896	557	859	865	697
YDR489W	233	234	289	259	221	267	231	184
YPR049C	451	395	668	637	364	489	689	521
YDL057W	310	240	200	258	344	269	242	156
YPR014C	1	0	0	1	0	0	0	0
YGR257C	921	961	909	904	721	978	804	622
YEL045C	5	10	10	16	13	18	10	13
YPL235W	1698	1559	2116	1921	1306	2007	2064	1492
YLR122C	32.068	29.946	27.983	47.385	24.196	43.629	20.109	28.76
YLR155C	9000	9781	6768	6403	8788	9282	6620	4638
YBL087C	4529.78	5126.11	4026.39	4000.22	3909.84	5339.18	3942.5	2834.91
YJL132W	488	292	251	299	461	317	274	222
YGL190C	979	724	1224	1203	772	832	1271	891
YBR110W	1061	950	1295	1391	905	1179	1347	1022
YDR144C	679	685	745	962	534	1023	820	603
YFL046W	768	582	573	570	681	630	602	452
YOR103C	336	333.994	802.991	771	353.998	410	890.998	563
YKL137W	576	576	382	413	473	514	386	273
YDR447C	5118.27	5350.85	4020.37	4264.89	3837.57	6319.5	4074	2924.84
YGL009C	3903	2823	3629	3445	3200	3592	3966	2878
YNL324W	0	2	2	1.015	0	0	0	0
YPR145W	5808.69	7406.27	8324.58	8205.07	4002.55	9312.04	7513.1	5933.44
YJL063C	1294	1336	1030	1083	1132	1129	855	680
YMR149W	3118	2572	2474	2434	2844	2908	2735	1646
YPL021W	2	1	0	0	1	0	1	3
YIR010W	880	654	717	596	731	727	586	464
YDR331W	703	594	686	773	595	747	722	539
YJL114W	3.214	0	1.519	16.489	3.063	0	20.058	3.549
YKR044W	367	411	441	421	247	482	440	352
YLR433C	866	617	811	770	705	829	948	657
YMR068W	261	196	150	127	273	183	158	101
YLR157C-B	0	99.636	46.726	0	68.599	0	0	16.014
YNL164C	215	231	342	363	144	321	327	242
YER032W	740	503	671	591	585	636	666	524
YJR070C	2041	2366	2613	2216	1646	2463	2256	1572
YGL005C	832	668	717	764	675	949	741	534
YHR043C	3079.46	2361.8	2107.7	2484.74	3089.2	2691.19	2416.7	1642.85
YDL111C	704	642	811	774	660	820	762	584
YMR133W	11	2	1	5	10	4	3	3
YPL007C	419	382	514	538	429	418	563	387
YKL159C	771	752	778	803	566	709	864	645
YDR507C	1345	1435	2329	2199	850	2325	2462	1780
YKR075W-A	1	0	0	5	0	0	0	0
YLR138W	2664	2014	2491	2531	1869	2422	2525	1781
YBR101C	5518	2614	2872	2311	4573	1630	1581	1146
YLR396C	431	358	595	610	376	472	624	419
YBR245C	1280	977	1617	1564	942	1405	1688	1111
YJL216C	126	97	133	137	83	124	160	129
YBR210W	399	302	416	425	363	432	450	359
YPL103C	673	484	515	535	567	560	535	420
YIL103W	280	381	567	520	179	515	491	365
YIL152W	547	495	325	394	460	453	395	260
YML045W-A	0	0	0	0	0	0	0	0
YJR096W	1024	911	674	613	1071	832	707	455
YAL010C	416	321	444	479	390	333	447	342
YGR143W	1597	1421	1576	1873	1510	1609	1744	1336
YGR112W	768	519	435	515	706	531	409	324
YLR256W	3808	2721	6245	6315	2835	3483	6817	4234
YHR174W	95450.3	80109.6	65168.2	77102.3	74863.5	70897.7	57123.4	35330.2
YOR012W	52.49	36.4	55.268	41.101	41.047	29.667	44.438	33.923
YIR001C	682	625	638	627	656	683	756	555
YDL213C	1146	1174	1262	1051	1158	1055	1193	774
YDR442W	1	0	0	0	0	0	0	0
YDR317W	17	37	64	69	39	40	72	34
YDR478W	138	117	156	137	116	151	130	88
YKL097C	7	3	3	0	5	4	0	0
YOL164W-A	0	0	0	0	0	0	0	2
YNL106C	511	407	550	593	430	526	601	454
YOR378W	15	9	8	11	15	14	9	7
YFR015C	12359	3467	1816	3439	11527	2778	2374	2059
YMR230W	4445.1	4600.17	4232.24	4184.94	3995.66	5542.95	4182.72	2888.31
YIL092W	247	220	359	316	176	303	312	236
YAR009C	10664.4	7776.14	18992.6	11702.7	8875.95	10126.2	19021.5	10427.4
YLR321C	739	681	782	758	576	784	817	585
YBR004C	481	556	1271	1717	340	795	1481	1080
YGR052W	588	165	158	82	621	152	185	99
YJR161C	660.117	467.969	490.113	595.564	577.598	546.833	577.685	380.068
YOR278W	426	375	368	407	387	352	384	264
YNL085W	1574	1173	2806	2979	1213	1583	3070	1979
YGL061C	232	200	324	280	183	215	333	228
YPL210C	1436	1299	2078	2220	1047	1655	2098	1519
tS(AGA)G	1	1	2	1	1	2	2	0
YOR087W	1251	1001	1168	1111	1058	1149	1177	738
YGL234W	8364	5408	7763	7318	6264	7431	8898	5582
YOR347C	1740	819	589	728	1804	701	807	481
YPR093C	297	286	227	233	311	261	222	162
YAL029C	1249	1132	1954	2179	861	1523	2234	1570
YOL155C	457.784	322.948	338.996	482.808	346.508	371.214	360.252	511.794
YDR421W	673	448	612	590	528	614	643	467
YGR186W	2580	2119	2432	2516	2088	2412	2433	1772
YDR294C	2272	1776	1615	1753	1947	1896	1788	1304
YHR135C	3211	2541	2500	2841	2539	2782	2583	1962
YDR015C	0	0	0	0	0	1	0	0
YBR181C	9944.57	10818.8	9814.2	9491.25	7589.64	11592.4	9544	6885.13
YOR078W	405	478	811	634	329	632	658	458
YOR243C	1299	1299	2325	2259	807	1700	2271	1612
YMR165C	1109	845	892	996	837	955	921	697
YCR005C	3287	2984	2621	2739	2770	3473	3434	2234
YLR163W-A	0	0	0	0	0	0	0	0
YPR055W	440	324	796	831	358	455	786	641
YIL016W	639	754	682	690	520	738	638	427
YLR032W	358	311	551	420	269	453	493	383
YDR114C	3	5	2	2	0	1	0	3
YLL030C	0	0	0	0	0	0	0	0
YDL185C-A	0	1	1	1	0	0	0	1
YLL065W	1.073	0	0	0	0	0	0	0
YPR046W	199	151	165	132	148	182	139	114
YBR099C	41	22	111	99	43.68	24	67.767	41.706
YBL027W	13376.7	15687.6	13046.5	13592.7	11386.9	15237.8	12510.5	9144.35
YOL060C	2802	1675	1574	1645	2341	1695	1545	1226
YIR018C-A	0	0	0	2	0	2	2	1
YOR382W	1314	1416	1106	1660	908	1055	629	805
YNL232W	605	763	669	689	577	835	716	549
YDL076C	634	571	561	644	562	603	628	466
YOR225W	0	0	0	1	1	1	2	0
YDR120C	903	1055	1472	1321	622	1337	1258	959
YLR465C	37	33	35.397	54	47.477	43.714	66	26
YJL192C	1321	1265	1312	1416	1192	1487	1409	1019
YEL020C-B	1.004	0	2	2.009	1.003	2.02	1.004	0
YLR054C	358	364	259	274	342	332	280	190
YLR009W	934	1274	1827	1631	653	1476	1573	1200
YKL116C	846	806	826	864	568	919	928	661
YBR209W	0	0	0	0	0	0	0	0
YOR292C	597	309	279	309	551	369	358	283
YLR423C	412	274	364	311	396	330	411	275
YDR278C	0	0	0	0	0	0	1	0
YLR105C	582	736	664	784	538	845	790	559
YML091C	1285	733	1805	1691	1195	1409	2401	1709
YHR191C	224	183	165	146	153	172	137	110
YDL098C	204	222	256	248	220	217	231	173
YLR202C	52	54.103	43.603	63.127	60.009	44.505	58.818	32.164
YLR299C-A	0	0	0	0	0	0	0	0
YKR005C	124	128	160	159	92	142	141	96
YMR143W	7307.97	7533.38	6061.74	6272.06	6193.25	8476.35	5900.11	4349.21
YCR063W	63	47	75	85	56	56	87	71
YNL189W	3304	2790	3328	3601	2657	3433	3428	2599
YFR024C-A	2801	2437	2116	2048	2304	2318	1930	1467
YCL047C	396	283	278	276	388	303	311	199
YGL122C	2015	2359	2312	2088	1651	2376	2246	1574
YDL018C	503	297	284	283	424	316	295	220
YOR120W	18788	14411.9	11320.8	15757.8	17612	12538.9	12032.9	9263.95
YPR160W	5680.98	2632	1747	2730	6727.79	2566	1993	2089
YBL060W	342	343	512	446	303	421	566	362
YDR065W	159	150	252	260	112	195	270	233
YBR019C	157072	109895	110120	144311	118289	117341	110577	79021
YKL056C	18501	15836	13491	12521	13943	16916	13018	8659
YKL065W-A	24	15	24	15	19	19	16	20
YGR160W	1.001	5.006	4.006	1.001	2.002	10.009	6.005	4.006
YDL163W	0	2	0	2.033	0	0	0	0
YPL068C	214	221	308	447	166	257	283	276
YJR057W	504	533	466	447	415	493	437	347
YGL211W	897	773	726	757	786	790	785	557
YFL032W	15	13	24	22	10	16	17	14
YPL195W	1155	895	1599	1617	898	1278	1724	1248
YCL044C	1496	803	961	737	1249	904	1054	608
YAL059W	269	359.895	474	417	181	419	366	305
YNL007C	15395	8397	7740	7125	12996	5188	4662	3334
YPL148C	132	148	162	166	108	148	138	104
YJR137C	907	728	1092	1001	699	955	1092	889
YMR021C	533	469	465	591	456	490	503	374
YMR074C	898	957	751	844	842	1047	841	616
YGR203W	221	265	197	217	220	247	175	127
YJR039W	486	341	500	571	457	442	582	407
YDL158C	18	17	95	79	7	16	91	48
YOR104W	479.426	319.888	369.057	383.59	383.543	408.846	401.727	270.815
YFL009W	1278.04	1021.81	1259.2	1323.46	1085.41	1268.72	1407.95	985.102
YLR297W	143	39	97	57	108	76	74	42
YLR279W	6.04	1	0	0	0	0	0	2
YDR216W	3757	2189	4426	5124	2956	3067	5249	3626
YIL120W	293	254	340	368	284	267	312	303
YBR030W	509	606	896	763	386	827	780	608
YPL162C	495	289	378	402	372	385	416	301
YGR095C	451	552	572	517	347	606	475	375
YCL027W	271	184	369	126	341	337	414	168
snR3	0	1	0	0	1	1	2	0
snR5	10	8	11	15	10	16	17	7
snR4	39	31	33	30	33	52	19	18
snR6	0	1	0	1	0	2	0	1
snR9	22	22	14	19	26	25	18	7
snR8	11	16	4	6	7	23	10	2
YHR029C	744	656	659	654	592	611	558	464
YIR021W-A	0	0	0	3	0	1	3	0
YAL033W	518	440	308	315	398	451	325	228
YNL130C	2072	1607	1929	1911	1692	2138	2030	1378
YNR036C	1848	1844	1062	1254	1681	1494	1193	859
YNR049C	648	578	514	505	580	549	538	353
YDR192C	424	428	376	340	399	511	358	269
YOL112W	1110	916	1167	846	941	1024	1099	699
YML109W	415	444	570	448	323	475	503	370
YOL083W	518	428	458	466	595	482	493	338
YNL251C	3171	985	1524	1384	1863	1781	1698	1388
YBR266C	0	0	0	0	0	2	0	1.002
YBL004W	814	648	1789	2070	479	1024	1872	1461
YER145C-A	1	4	2	3.001	3	6.001	0	2
YBR164C	934	1026	1072	1030	829	1087	1062	822
YHR074W	2275	1993	2324	2421	1894	2407	2466	1716
YDR464W	805	837	1132	1086	547	1044	1124	843
YFR030W	1346	1119	1406	1214	1056	1366	1340	915
YJL146W	593	484	522	562	492	539	556	383
YKL078W	81	235	408	377	53	285	296	308
YIL055C	729	527	494	583	601	514	513	391
YPL053C	1760	1349	1706	1633	1443	1759	1671	1159
YLR351C	1790	2058	1713	1742	1859	1988	1790	1230
YEL009C-A	3	6	8	7	6	1	5	7
YJR111C	280	300	360	435	209	421	357	268
YIL030C	1417	1295	2560	2786	1136	1969	2594	1992
YER125W	2970	2127	2973	3309	2164	2788	3282	2278
YER152C	1871	1675	1347	1492	1620.99	1663	1563	1056.98
YLR015W	369	354	416	418	256	420	381	315
YHR116W	263	284	184	234	207	202	155	139
YPL259C	1089	1097	1276	1691	906	1380	1517	1099
YOL100W	1140	786.981	1087.94	1216.95	969	1008	1278	824
YOR039W	1144	864	1121	1082	989	1106	1181	793
YDL037C	78	133	273	483	102	321	348	389
YLR334C	0	0	0	1	0	0	1	0
YHL043W	2	0	0	0	1	3	3	1
YOR364W	10	10	12	14	7	17	14	7
YOR386W	688	326	364	426	576	351	390	335
YAR042W	1813	1207	1280	1431	1479	1398	1525	1018
YPR198W	1180	1266	1624	2116.99	963	1651	1943	1401.96
YHL038C	430	328	382	438	324	358	403	309
YLL053C	108.602	45	59	32	95	57	43	60
YDR425W	536	389	615	681	465	437	673	539
YOR331C	6.008	9.017	3.003	2.004	9.01	10.016	4.007	1.002
YML076C	632	460	739	777	447	656	748	528
YKR060W	211	229	376	282	148	339	340	256
YHR094C	7.214	4.095	5.109	6.101	5.096	8.261	1.021	7.167
YER069W	788.937	681	872	851	634	1088	953	711
YMR091C	1276	1128	1305	1340	1124	1301	1350	995
YER012W	3077	2826	2691	2482	2859	2592	2815	1832
YHR098C	3078	1816	3113	3173	2534	2446	3778	2213
YDL135C	1300	1155	1299	1206	1098	1257	1374	987
YCR093W	1388	977	2424	2498	1019	1420	2485	1755
tP(UGG)O3	0	0	0	0	0	0	0	0
YGR273C	1	0	1	2	2	2	1	0
YGL080W	501	532	660	709	573	772	766	475
YBR069C	1500	2445	3316	3342	1144	3517	3180	2473
YGR077C	678	609	837	901	728	695	853	662
YCR104W	7.617	10.281	4.79	7.311	10.853	8.157	5.601	2.37
YDR040C	4305.05	3808.11	3481.06	3852.52	3159.11	4305.81	3211.81	2802.18
YPR012W	17	10	24	20	15	19	17	23
YGR255C	1822	1203	1333	1468	1616	1408	1409	1032
tM(CAU)M	0	2	0	1	0	1	0	1
YDL051W	1612	1555	2242	1970	1408	1978	2172	1454.99
YBL102W	937	902	760	782	1049	907	741	512
tM(CAU)P	2	2	1	1	3	6	4	5
YPL237W	3841.99	3829.98	4374.98	4375.98	3330.98	4243.99	4279.97	3047.99
YLR120C	5854	5550	4951	6602	4111	6794	6266	4576
YCL001W-B	9	2	7	5	5	4	12	9
YCL001W-A	3	2	8	6	4	6	7	3
YNL068C	528	404	519	466	429	527	448	344
YJL169W	1	0	1	1	0	1	0	3
YBL002W	7283.42	5650	6257	5955	5757.43	6092.36	5865	3715.04
YDR146C	1743	851	1126	952	1293	906	1080	741
YBR112C	2793.74	1892.6	1974.18	2518.44	1990.59	2230.84	2125.8	1645.14
YBL081W	255	467	623.512	642	210.097	694.395	578.929	468.838
YFL040W	5	5	11	13	8	7	9	8
YNL326C	444	441	460	414	448	558	475	329
YDR337W	846	732	749	791	693	748	663	549
YJL061W	632	530	1024	1063	586	800	1120	816
YPR147C	915	830	784	883	761	884	877	585
YKL131W	1	3	2	1	4	1	6	2
YDR441C	578	465	481	496	433	523	392	318
YPL094C	3565	2926	2751	2636	3125	3188	3062	1829
YOR101W	1229	1461	1738	1875	778	1645	1456	1262
YER020W	3254	2640	1764	2120	2753	2334	1872	1389
YDR231C	812.99	617	418.99	391	760.998	592	475	320
YJL112W	1084	891	1001	1069	816	1116	1032	794
YFL066C	517.127	297.031	347.692	471.814	423.308	436.577	583.166	370.885
YNL193W	713	574	721	838	643	682	790	598
YML058W	3165	2384	1720	1839	2880	2602	1891	1277
YBR188C	293	305	304	311	305	342	279	252
YLR435W	331	402	612	480	224	527	471	365
YJR076C	2176	1897	2002	1863	1890	1870	1987	1319
YKL157W	4780	3929	4456	5071	3827	4608	5046	3703
YBR003W	1449	1003	982	1005	1258	1104	1044	773
YPR129W	2006	1786.94	1913.92	1913.99	1724.99	1928.98	1839.99	1329.88
YDL113C	1328	993	1112	1323	1085	1104	1281	919
YMR135C	1840	1315	1315	1331	1651.99	1338	1348	1103
YGL007W	3	5	4	0	0	3	4	7
YPL005W	348	259	338	323	299	341	327	268
YBR247C	473	582	1017	920	287	809	763	657
YLR185W	4268.43	5196.33	3946.22	4100.33	3891.63	5290.99	4007.26	2813.1
YJL210W	969.993	864.988	567	655	893	797.994	561.997	452
YLR398C	1180	932	1458	1533	824	1253	1577	1121
YIL154C	1557	1485	1048	1107	1550	1262	1064	790
YIL101C	2327	1741	1251	1468	2081	1528	1549	1129
tT(CGU)K	0	0	0	0	0	0	0	0
YKL004W	1206	1163	1633	1657	879	1509	1428	1139
YPL154C	13162	12759	9170	10061	12730	11546	10365	7060
YPL101W	971	932	1079	1053	807	1108	1025	770
YLR258W	7571	2730	2112	2817	8246	2593	2484	2109
YBR178W	5	1	5	1	1	4	1	0
YJR098C	266	193	231	277	198	264	266	216
YHR176W	260	301	302	264	250	284	256	204
YJR018W	8	4	10.039	5.01	6.012	10.063	10.059	7.037
YMR326C	2	2	1	2	1	0	2	0
YDL244W	36.204	56.692	33.37	50.093	67.682	70.069	42.501	49.126
YDR319C	532	445	687	868	504	523	871	572
YKL095W	526	426	450	363	364	475	450	341
YOL099C	0	2.019	7.063	6.051	2	10	5	12
YIL094C	3128	2627	2482	2756	2401	2782	2256	1721
YLR451W	930	698	1012	1152	615	939	1084	799
YFR017C	2294	1088	441	755	2686	785	729	512
YLR342W-A	8	2	22	23	1	3	21	17
YIL076W	2078	1717	2122	2224	2198	2139	2440	1695
YNR077C	5.927	0	0	3.771	2.798	4.602	2.928	3.297
YOL044W	331	305	433	417	309	356	515	330
YLR323C	229	187	252	195	182	248	202	193
YOR085W	2258	1719	1781	2012	1864	2038	1940	1308
YGR054W	2061	2105	2775	2817	1456	2617	2563	2066
YOR050C	7	7	3	5	2	0	4	2
YNL087W	2598	1955	3096	3127	1974	2592	3535	2144
YGR114C	0	0	0	0	0	0	0	0
YLR318W	128	127	325	261	100	166	321	254
YBR278W	448.998	371	291.99	291	370	345	259	216
YNL024C-A	400	427	450	456	344	438	449	306
YDR296W	1242	1127	905	970	1099	1018	755	659
YGL232W	655	587	942	918	620	751	923	703
YPR091C	1883	1316	1601	1833	1591	1726	1743	1274
YGR141W	894	668	521	627	893	754	590	465
YAR030C	10	14	13	18	9	8	20	14
YGL111W	975	809	1347	1221	759	1043	1116	899
YJR158W	0	0	0	0	0	0	0	0
YHR137W	1331	1221	1209	1101	1195.99	1757	1247.98	937
YFL011W	32	50	61	77	33	37	43	35
YMR198W	547	315	395	382	370	376	365	292
YCR003W	512	588	412	489	374	599	410	309
YMR316C-B	90.995	83	74	76	73.995	83	95	52
YMR316C-A	7	5	5.02	7	4.016	6.018	4.037	5.021
YDR342C	24534.5	18490.2	10398	23019.9	21239.9	19335.5	10357.2	14003.2
YMR163C	516	320	544	485	339	392	583	406
YGR294W	20.772	20.148	26.726	22.195	15.378	30.329	27.587	19.592
YEL008W	3	3	4	2	6	4	4	2
YLL067C	45.292	83.82	52.965	155.123	35.978	17.349	0	75.832
YHR086W-A	1	0	0	0	0	0	0	0
YBR020W	156220	128071	125553	150765	134271	130788	131484	88036
YLR418C	965	850	957	924	854	1026	997	625
YDR112W	1	0	0	0	0	1	0	0
YER059W	1140	701	702	819	980	759	735	554
YNL076W	1020	811	930	952	805	980	905	668
YBL025W	176	175	148	176	155	192	159	113
YOL066C	659	616	664	586	574	706	630	448
YDR126W	256	204	218	205	224	263	230	143
YPL216W	398	225	429	402	244	312	400	285
YOR223W	476	382	300	306	480	339	346	214
YEL022W	725	627	1476	1550	484	882	1574	1125
YHR072W	1831	1744	2122	1956	1589	2112	2177	1585
YOL019W	2188	2452	3055	3222	1654	3371	3469	2348
YLR463C	99.867	105.333	92.933	153.951	146.13	159.323	113.065	77.664
YJL190C	5280	7096	6290	6369	4163	8094	5862	4411
YMR218C	523	447	881	787	431	587	963	598
YNL265C	1117	937	907.95	894.947	1023.99	1101	1007.98	650.961
YNL230C	269	270	334	395	209	288	331	292
YLL049W	256	198	269	221	274	281	301	187
YHR211W	811.974	537.4	595.582	799.686	614.039	682.488	633.117	558.998
YPR166C	523	554	526	598	430	471	543	356
YJL042W	2534	1491	2162	2219	2085	1924	2418	1570
YNL301C	1380.38	1354.45	1143.88	1409.91	1259.43	1813.95	1187.97	1071.96
YDR333C	946	906	1355	1371	799	1220	1407	1011
YMR058W	16284	17858	17891	19256	11813	22655	16062	13263
YDR061W	888	749	776	755	776	833	740	556
YJR112W-A	555	471	343	342	482	430	304	252
YOR290C	1983	1401	2197	2495	1484	1838	2426	1646
YKL114C	1129	992	1139	1108	934	1174	1227	805
YML024W	9155.73	11094.2	9285.63	9553.11	7779.43	11732.5	9673	6588.16
YML093W	977	1240	2038	1790	542	1701	1766	1400
YHR197W	299	355	1025	812	176	565	875	708
YDR276C	2468	1963	1583	1495	2430	1927	1762	1046
YLR200W	551	457	560	506	460	548	518	328
YKR003W	1177	801	781	881	988	916	921	663
YLR107W	927	833	1113	1113	798	1097	1101	785
YMR321C	0	35.225	2.43	0	49.108	34.239	0	0
YER175C	875	598	760	721	792	731	740	603
YIR012W	1041	1310	1644	1443	798	1441	1292	1001
YDL183C	200	128	158	196	182	159	159	161
YPL278C	220.241	172.482	173.408	179.571	180.81	189.266	177.279	103.255
YMR105W-A	1	0	1	1	0	2	2	1
YMR118C	5	6	9	2	17	7	11	9
YCL049C	1175	1229	881	1225	1076	1168	989	752
YBL066C	780	649	830	911	695	955	1011	785
YGL120C	1942	1843	3028	2595	1261	2319	2807	2014
YGR271C-A	185	247	507	358	85	345	399	311
YDR169C	1698	1316	1319	1352	1297	1498	1469	1041
YOR057W	699	556	707	697	561	771	823	519
YLR410W-A	0	0	46.406	0	140.499	0	353.238	232.879
YLR169W	0	2	1	0	0	2.004	2	1
YMR272C	2834	2707	2242	2651	2567	3093	2376	1748
YPR108W	2585	2379	2576	2399	2019	2254	2473	1801
YKL054C	4661	3108	3249	3912	3204	3463	3454	2539
YGR162W	2646	3062	4695	4729	1615	4289	4758	3655
YDL165W	767	669	545	573	701	705	611	371
YDR520C	296	287	581	623	256	377	557	408
YKL023W	679	497	504	461	549	487	483	378
YJR051W	1368	1110	1103	1130	1162	1233	1141	802
YNL009W	290	270	320	312	274	287	297	238
YFL034W	892	807	943	1036	675	968	943	719
YKL164C	9688.58	7529.12	6040.33	6348.54	7256.77	7919.88	6495.69	5181.04
YJR135C	146	128	140	161	138	155	167	124
YGL213C	763.992	764.991	981.981	840	736	840.995	963	664.954
YOR161W-A	1	0	0	1	1	1	0	1
YMR076C	461	354	849	706	322	490	797	503
YOR161W-B	14	27	11	23.914	20	16	14	18
YJR037W	0	0	0	0	0	0	0	0
YNL027W	1499	1137.75	1485	1791	975	1289	1495	1120
YLR291C	813	706	1020	930	655	856	1011	757
YDR210W	655	450.999	379.998	365	664	485.999	416.999	257
YIL122W	469	425	410	553	362	476	416	389
YDL230W	660	445	357	307	561	413	334	292
YJR113C	1290	1241	945	961	1124.99	1179	848.985	704
YGL075C	142	119	188	179	126	143	154	124
YHR041C	645	706	501	539	529	672	473	381
YIL156W-B	650	612	376	404	664	640	422	245
YIL156W-A	3.002	3.006	2	2.002	2.002	0	0	3
YLR416C	6	3.087	4	4.149	5.209	7.117	8	3.079
YGR097W	1780	1293	1697	2337	1289	1695	1932	1513
YIL068C	955	680	972	1086	842	843	1091	779
YCL025C	12006.7	11625.6	9148.42	11036.1	8192.26	13780.6	8792.68	7283.45
YNR034W	721	542	396	463	697	484	425	313
YOL085C	3	1	2	2	2	4	1	0
YNL282W	168	214	224	215	136	250	187	132
YBR286W	13184	11857	9302	10414	13260	11468	10172	7018
YGL144C	380	484	573	618	294	579	536	422
YDR190C	2627	2271	2510	2492	1899	2573	2467	1834
YAL031C	870	616	692	756	846	797.974	758	532
YBL006C	1264.77	1222.83	765	890.748	947	1075.97	689	537
YNL132W	768	873	2113	1954	389	1347	1884	1439
YBR264C	430	354	343	319	423	329	348	234
YBR231C	500	470	392	336	408	410	369	243
YLR162W-A	19	7	8	3	9	15	7	8
YPL197C	3.006	0	1.003	4.011	2.009	1.001	2.003	2.006
YHR076W	1425	1069	913	941	1174	1106	906	643
YDR462W	558	564	401	484	485	445	391	293
tP(UGG)Q	0	0	0	0	0	0	0	0
YJL148W	601	789	1224	1054	409	1074	1020	874
YIL057C	246	414	179	370	192	322	145	127
YPL055C	783	572	557	517	651	574	559	396
YLR353W	1119	822	1037	931	871	980	1050	756
YIL020C	179	187	223	203	153	201	198	163
YIL148W	9651.92	10466.4	8648.19	8920.42	8795.37	11113.9	8531.46	6068.91
YNR016C	12587	9900	15691	17963	8440	12914	17391	11112
tY(GUA)J1	1	0	0	0	2	1	2	1
YFR036W	154	133	132	117	117	129	118	102
YER023C-A	1.009	1.028	0	0	1.004	0	2.047	0
YHR114W	1029	792	1064	1080	766	877	1098	803
YGR028W	1579	1114	1489	1438	1375	1378	1682	1036
YER150W	1642	810	481	378	2243	662	578	344
YNL279W	112	111	135	83	113	144	161	82
YDR400W	868	569	919	786	782	767	1129	609
YDL068W	0	1	4.028	1	5	3.039	3	3.028
YOL027C	1777	2061	2307	2143	1564	2133	2282	1573
YPL257W	124	72	95	136	98	92	95	93
YPL120W	380	178	261	244	310	244	293	229
YOL145C	1770	1533	2645	2683	1329	2066	2643	1810
YJL099W	641	484	598	630	512	553	600	469
YHR149C	542	693	928	998	393	1022	827	729
YDR395W	1407	935	2119	2028	910	1516	2176	1544
YOL110W	548	597	348	449	544	487	389	328
YDR005C	1270	915	1160	1249	1159	1137	1299	980
YMR311C	2714	2117	1678	1691	2392	1875	1909	1274
YHL041W	0	0	2	1	0	0	1	2
YBL039C	1075.49	1435	2378.41	1847	645	2001	1999	1521.69
YGR188C	209	162	264	263	153	215	237	192
YOR362C	3872	3898	2954	3110	3229	3495	2776	2065
YPR106W	431	271	389	398	321	310	394	295
YLR126C	936	750	892	972	751	847	1105	618
YDL053C	896	924	956	982	824	968	952	640
YML074C	5370	4974	4800	4008	5263	4501	5069	2994
YKR062W	780	796	764	874	736	847	870	593
YBR235W	1133	942	1212	1318	899	1205	1333	859
YER010C	693	702	634	642	632	671	575	423
YML003W	85	67	142	176	73	86	151	116
YMR097C	786	610	613	625	762	689	747	489
YDL133W	747	675	706	847	604	765	766	586
YNL330C	1591	1353	1428	1492	1363	1318	1290	1023
YGR228W	5.025	2.032	7.119	3.056	3.018	6.043	5.059	7.075
YHR096C	692.79	385.916	430.891	205.9	733.904	433.79	417.983	253.834
YBR008C	525	528	610	535	454	612	546	487
YDL035C	1354	891	1177	1159	1137	1071	1256	774
YMR253C	544	404	418	445	445	474	365	285
YCR102C	181.062	236.238	212.139	189.765	153.556	184.809	174.641	115.191
YJL127C-B	356	336	281	347	353	401	331	269
YOR257W	945	944	805	884	799	881	831	521
YGR002C	612	525	619	673	479	574	608	485
YEL041W	464	261	214	266	374	244	215	178
YGR075C	128	96	195	174	121	125	180	123
YGR253C	3344	3395	2928	2783	2904	2910	2848	1883
YDR510W	2695	2688	2034	2030	2523	2420	2075	1424
YEL014C	0	1	2	1	0	0	0	0
YPL050C	2152	1742	2116	2035	1643	2278	2094	1541
YMR166C	418	233	204	274	289	278	215	191
Q0115	0	0	0	0	0	0	0	3
YPR045C	646	480	695	896	553	697	892	597
Q0110	0	0	1	0	0	0	0	0
YPL231W	19819	15854	20773	26077	12951	21298	24585	16210
YLR148W	600	328	887	881	487	531	891	629
YMR137C	338	230	378	371	309	331	408	307
YDL082W	5066.18	5875.91	4871.16	5272.56	4106.37	6275.91	4775.35	3569.7
YKL155C	563	632	844	790	455	708	788	545
YBR162W-A	1404	1567	1068	1025	1274	1570	1084	697
YFL042C	1516	1155	1039	1141	1248	1093	1104	764
YBL083C	237.925	247.696	202.742	171.1	178.284	225.318	185.728	149.879
YDR148C	4898	4123	3570	3930	4851	5387	4656	3550
YHR052W-A	451.821	410.592	149.514	164.863	530.701	398.409	201.065	226.586
YPL096W	745	531	541	512	607	601	630	406
YDR335W	2008	1508	2267	2565	1558	1830	2566	1776
YPR141C	381	274	412	401	219	296	464	310
YJL067W	2	1.003	0	0	3.01	0	0	0
YMR039C	1930	1955	1804	1731	1737	1921	2224	1341
YIL058W	2	2	4	4	2	0	2	2
YNL320W	536	511	585	559	467	589	551	421
YPL078C	5307	4821	4344	4375	5645	6581	5983	4118
YCR095C	352	296	469	505	303	369	462	326
YLL011W	288	531	948	686	180	813	725	575
YCR077C	2432	2369	3129	3586	1946	2782	3112	2380
YLR437C	353	280	223	292	289	314	212	185
YFL064C	138.539	128.148	29.502	6.21	61.383	218.189	72.119	23.355
YNL191W	196	196	204	192	204	225	150	183
YDR237W	920	788	772	897	788	876	712	565
YJL110C	656	577	902	702	472	729	721	537
YKR048C	4682.89	3562	3543.88	3315.59	3960.9	3504	3494.75	2438
YBR001C	1583	759	805	898	1397	836	789	660
YPL003W	882	449	373	403	829	493	497	358
YKL108W	323	337	361	276	239	341	253	218
YGR110W	801	506	465	450	755	542	607	352
YJR074W	1098	1236	912	987	943	1187	940	640
YPR127W	958	980	887	879	886	905	903	641
YIR028W	45	41	37	34	57	100	55	40
YAL012W	4993	4399	4990	4067	4276	4318	4592	3223
YMR288W	461	450	631	641	305	565	609	486
YIL156W	749	521	777	776	589	641	767	632
YBR241C	1220	1042	635	690	1293	983	670	474
YHR063W-A	1.002	0	2.012	2.006	3.024	0	8.027	3.029
YJL212C	117	93	94	129	99	109	104	77
YPL156C	600	542	763	951	479	705	824	623
YNL312W	1169	1238	1043	970	1050	1180	1053	682
YLR187W	691	575	711	948	424	717	767	589
YDR099W	6459.74	5851	6410.35	6549.4	5545.17	5858.34	6679.84	4790.37
YKL133C	461	348	421	362	528	437	442	313
YLR400W	4	3	1	1	2	1	0	1
YHR170W	1979	1848	3003	3000	1429	2342	2811	2188
YDR259C	118	74	111	129	94	91	93	87
YKL068W	1079	1102	1576	1622	696	1487	1605	1180
YOR032C	172	175	228	274	159	199	210	167
YKL093W	1218	840	662	782	1190	778	685	584
YMR002W	3857	3953	3194	3040	3201	3489	2744	2230
YLR145W	310	277	218	248	306	271	207	164
YLR261C	339.695	308.961	307.904	269.337	293.317	337.194	310.685	237.631
YDL246C	0	197.056	150.825	190.789	153.775	189.18	295	182.526
YER081W	2823.99	1215.93	2483.43	2783.67	2303.65	1767.12	2857.14	1725.3
YPL178W	1102	1083	1105	1257	901	1182	1174	924
YMR172C-A	0	1.013	2	0	0	0	0	0
YPR202W	123.772	86.921	319.825	455.498	156.038	140.276	460.213	306.452
YIL096C	141	222	467	340	95	247	354	318
YOL046C	0	0	0	0	0	0	0	0
YFR011C	750	746	796.879	772	773	842	917	712
YIL074C	1492.01	1437.07	1773.41	1729	1298	1902.53	2015.4	1295.25
YGL173C	4522	3236	4953	5097	3139	3787	5416	3557
YHL008C	724	564	626	653	587	615	580	506
YLR457C	414.995	252	342	329	320	380	383	263
YNL249C	345	282	407	364	297	339	451	311
YGR056W	713	608	978	1004	490	775	958	720
YGL065C	797	560	967	997	642	727	1108	775
YOR052C	2400	1513	1189	1230	1828	1296	1347	879
YGR116W	2667	2017	3794	4054	2134.99	3042	4334	3016.99
YOR343C	30	28	25	26	25	43	27	29
YGL230C	7	3	7	7	8	7	2	6
YOL159C	167	128	195	216	200	174	215	151
YBR185C	443	338	470	483	357	415	408	336
YOR010C	275	230	195	347	157	220	178	159
YDR290W	0	0	0	0	0	0	0	1
YDR019C	986	667	781	704	768	844	870	632
YBR150C	845	586	919.712	940.457	627	702	933.438	579.428
YIR042C	24	63	49	87	53	63	49	102
YFL031C-A	0	1	0	1	0	0	0	0
YER119C	1226	948	653	672	1235	847	614	509
YMR196W	3209	1844	1740	1731	2961	1937	1865	1561
YMR161W	786	779	741	741	644	806	704	487
YDR499W	528	434	687	650	363	512	675	550
YKL068W-A	143	148	211	181	131	184	207	155
YJL133C-A	791	737	397	486	978	794	439	328
YHL046W-A	0	0	0	0	0	0	0	0
YDL215C	3477	3024	4657	4917	2580	5618	5404	4165
YJR120W	69	93	93	95	121	148	109	64
YLL061W	416	338	343	359	312	372	299	238
YDR110W	408	365	702	566	279	508	606	414
YDR419W	590	503	522	579	475	573	587	416
YOR221C	767	648	627	666	626	701	682	536
YPL214C	815	681	791	820	731	775	807	581
YBL108C-A	26.345	17.47	25.871	35.077	16.553	30.475	26.158	23.897
YGL165C	2.002	4	8.017	4	4.009	3.004	7.015	2
YOL064C	1067	1026	1075	1085	947	1232	1103	853
YBL023C	770	658	824	887	684	832	908	638
YOR274W	576	588	725	697	456	676	708	534
YOR329C	2070	1409	1353	1914	1535	1744	1594	1351
YLR005W	1031	955	872	934	881	1046	949	622
YDR124W	167	84	124	126	102	122	123	97
tI(UAU)L	0	0	0	0	1	1	1	0
YNL267W	1574	1054	1521	1417	1297	1320	1687	1102
YBR134W	3	2	3	0	2	0	1	2
YLL047W	0	0	1	0	0	1	2	0
YLR461W	14.308	13.268	13.971	11.127	7.065	9.674	7.341	7.157
tI(UAU)D	0	2	1	0	0	0	0	0
YLR050C	478	408	371	337	430	454	373	295
YOR124C	1406	927	1638	1427	1212	1076	1647	1085
YDR067C	290	270	458	426	271	374	521	349
YMR056C	424	399	267	300	394	403	239	215
YHR032W-A	66	62	74	77	48	70	78	48
YJL044C	853	792	1062	1115	798	905	1219	856
YPR164W	475	386	889	902	364	603	974	644
YEL060C	24420	19257	16511	19832	17018	20009	19090	14162
YHR195W	1181	792	613	722	974	749	699	548
YLR101C	27.052	16.078	15.043	23.122	20	21.093	25	15.351
YBL107W-A	6.945	1.055	22.571	16.632	3.222	4.236	17.161	5.496
YML026C	8943.95	9857.68	8342.95	8460.23	6877.77	11523.2	8087.48	6232.14
YPR066W	282	224	207	211	233	241	192	156
YDR073W	740	550	509	597	580	607	552	452
YDR229W	1174	887	821	905	950	843	826	643
YDL181W	1660	1396	1076	1024	1901	1927	1756	1197
YBR022W	466	306	360	375	319	370	336	244
YER177W	17687	16229	12049.6	12584.1	16037.7	14815.7	13057.2	8767.55
YML048W	4750	5402	4888	5502	3690	5453	4737	3558
YBL064C	4079	3186	1996	2431	4240	2680	2149	1883
YIL045W	713	318	404	395	891	304	452	328
YKL221W	26	32	36	32	19	32	22	29
YGL126W	3441	2288	1883	1905	3173	2388	2233	1328
YLR167W	32979.1	34886.8	27526.6	29416.4	27919.3	38016.5	27305.8	19560.6
YMR270C	761	658	839	710	574	695	739	560
YLR293C	7968	7744	7503	7851	6985	7709.91	7584	5245
YLR228C	1042	765	873	1098	779	894	873	700
YJR053W	161	106	129	169	107	133	136	129
YJL171C	5583	5858	4900	6596	3999	6385	5749	3924
YDR374C	3	7	17	5	6	10	12	11
YKL021C	999	866	1419	1112	754	1014	1227	867
YDL167C	474	566	1054	942	272	946	930	694
YLR388W	2821	3419.41	2728	2954.43	2574	3649.3	2774.39	2088
YLR373C	796	542	1119	1217	663	807	1259	919
YKR001C	3788	3139	3959	4308	3133	3770	4401	3029
YKR054C	892	612	1134	1116	622	763	1221	800
YIR034C	1080	1047	1027	1056	879	1159	909	760
YGL013C	886	799	1335	1352	638	961	1320	971
YJR068W	1012	961	1078	1105	966	1039	1146	726
YGR207C	1693	1495	1472	1400	1481	1435	1507	1021
YDR212W	2919	2417	3190	2890	1989	2542	2825	2009
YNL052W	2782	2556	1992	2120	2920	3296	2525	2112
YGL188C	293	267	214	214	315	381	341	203
YNL025C	389	240	335	401	293	287	313	276
YGR121W-A	2	4	0	2	3	2	3	6
YGR091W	336	306	347	379	305	342	375	280
YDL232W	161	196	115	114	179	159	128	84
YPL119C	346	270	337	262	290	285	262	209
YLR242C	186	160	358	356	171	186	385	258
YMR031W-A	1	1	1	3	1	3	1	1
YJR148W	1867	2312	1613	1521	1888	2386	1750	1301
YJR082C	469	402	397	418	426	439	380	294
YOL087C	2520	1987	2132	2791	1907	2267	2440	1869
YNL134C	11887	13558	11364	8965	10806	10393	10666	7135
YAL037W	100	105	150	102	90	113	123	67
YGL146C	320	296	290	403	239	383	325	287
YCL075W	0	0	0	0	0	0	0	0
YBR262C	886	907	580	632	762	706	548	378
YPL199C	901	911	898	956	899	937	957	702
YML101C-A	28	15	17.418	22	31	20	10	10
YFL036W	1407	1093	1626	1913	946	1381	1633	1244
YDL209C	172	215	287	258	145	276	233	206
YIL051C	2143	1945	1630	1636	2080	1866	1709	1141
YPL057C	2974	2563	2547	3678	2213	3063	2955	2280
YNR010W	385	356	383	419	323	391	365	277
YDR365C	5467	3863	4824	3430	3891	4488	4690	3117
YLR308W	0	0	1	0	0	0	0	0
YNL169C	2403.95	2546.95	2549.85	2802.86	1871	3111.86	2797	2023
YFR034C	594	589	522	519	421	652	493	423
YHR070W	543	646	696	698.956	367.992	764	629	542.934
YDR460W	589	528	522	488	572	535	594	390
YNL112W	2746	4499	7607	7502	1773	6254	6300	5689
YHL047C	1946	1803	2021	2530	1110	1508	1701	1363
YOR360C	668	520	1206	1295	490	887	1069	837
YOR335C	4413	3956	6191	6416	3071	5599	6318	4562
YDR354C-A	0	2	0	0	0	0	0	0
YKL100W-A	0	0	0	0	0	0	0	0
YGL251C	273	212	296	340	218	254	310	282
YER156C	2435	2564	2742	2672	2009	2698	3072	1896
YPL255W	432	434	453	523	323	514	431	369
YOR095C	557	657	987	979	457	885	933	794
YEL038W	660	638	399	528	609	664	400	320
YCL014W	742	489	845	814	520	652	935	636
YOL025W	494	296	464	457	423	345	455	366
YPL208W	673	520	635	632	604	682	583	509
YOL147C	650	745	625	671	624	794	573	407
YNL280C	1148	1058	1096	1212	978	1264	1161	825
YDR007W	1141.76	1042.92	763.916	935.897	1002.83	1063	769.921	571
YIL160C	92	149	94	87	125	142	111	83
YPR089W	961	863	1403	1594	835	1106	1553	1176
YBR233W	874	652	805	748	682	753	824.996	550
YPL122C	327	363	558	614	307	451	577	422
YKL104C	5866	3699	6110	4692	5288	4806	7578	3843
YMR313C	893	703	902	974	802	886	969	760
YGL179C	354	380	512	558	288	537	648	386
YGR120C	305	241	352	322	263	274	338	247
YML001W	1588	1667	1454	1524	1477	1833	1549	1035
YLL028W	690	305	407	294	513	400	386	278
YER016W	961	901	978	832	911	900	959	626
YHR061C	437	417	451	527	269	518	380	354
YDR438W	303	289	345	389	274	329	341	225
YNL211C	37	34	91	89	54	72	101	72
YLR124W	2	1	0	2	3	3	1	2
YML058W-A	10	19	10	26	15	16	14	16
YLR026C	956	938	933	1027	708	1017	905	700
YJR065C	5963	4827	3923	4637	5135	5051	4452	3205
YDL131W	3178.37	2961.45	3172.61	3328.28	2663.19	3270.93	3239.2	2391.89
YMR095C	36	32	21	34	39	42	28	33
YER138C	35471.9	16765.7	24956.8	17114.2	26090.8	23047.3	31464.6	17213.1
YDL033C	262	368	287	280	228	284	273	183
YMR255W	1073	1118	986	1131	928	1134	1092	738
YHR209W	589	332	453	451	562	337	479	348
YGL247W	220	195	215	202	165	188	227	163
YCR100C	96	74	104	118	125	106	116	79
YDR516C	7673	4700	2606	4606	8069	3952	2875	2552
Q0130	2	1	3	6	0	0	3	1
YPL233W	588	627	492	623	451	695	550	413
YOR255W	1	5	2	3	4	2	3	2
YOR063W	51625	49870	43016	49061	41533	53139	42825	31229
YOR200W	2.547	0	0	0	0	1	1.135	0
YGR251W	227	258	313	265	152	290	253	208
YPR047W	432	388	428	508	404	407	414	350
YDR246W-A	12	20	18	17	11	18	11	11
YDR044W	959	800	686	850	779	963	696	533
YEL016C	736	549	610	631	604	637	614	435
YAL027W	323	339	312	298	296	300	284	218
YKL153W	20.025	33.044	12.02	12.014	17.028	15.014	12.016	7.018
YFL019C	3	9	12	21	5	3	16	6
YMR139W	1320	886	1137	1288	1164	1002	1284	950
YDL080C	865	726	717	983	710	882	910	613
YOR172W	523	449	820	908	464	646	940	636
YOR105W	127.574	109.112	206.943	181.41	127.457	150.154	210.273	144.185
YJL138C	10607	12062.3	12708.5	13479.8	8791.05	13200.4	12212.6	8810.24
YPR143W	426	777	934	904.998	402	849.998	837.999	590
YDR340W	60	63	275	236	57	79	290	163
YNL322C	4216	3406	2751	2747	3790	3297	2917	1888
YPL090C	13435.4	15263.2	13047.8	12798.7	11058.4	15823.6	12352	8502.87
YPR078C	3.227	8.4	4.73	2.482	0	6.872	10	6.225
YCR075C	568	441	331	374	562	487	356	234
YFL062W	9.682	1.804	5.527	13.416	18.334	6.329	3.755	22.152
YDR171W	29957	8259	5415	4463	25536	3889	2928	2159
YLR439W	899	892	698	786	708	849	662	602
YCR020C	143	120	130	139	120	136	117	92
YDR450W	9572.05	10674.3	8819.05	9328.77	8175.23	11868.8	8938.52	6372.86
YCL051W	1326	959	864	856	1128	968	854	652
YCR097W	729	643	703	713	557	680	764	542
YBL039C-A	2.512	0	2.586	0	0	0	0	3.305
YDR235W	445	384	1078	1133	402	517	1141	809
YGL194C-A	102	72	116	91	109	98	149	65
YER038C	156	137	263	249	131	177	257	197
YPR125W	665	871.986	1222	1078.99	452	1003	1143	810
YHR049W	2121	2002	2646	2486	1797	1701	2274	1462
YBR007C	764	531	793	716	597	561	685	524
YPL001W	301	322	496	471	274	430	508	361
YJL038C	6	5	7	7	3	3	6	3
YNL319W	10	1	7	15	0	2	15	14
YPR178W	675	520	515	521.964	510	575	609	443
YER079C-A	2	0	0	0	0	0	0	0
YDR475C	1206	838	910	1000	1014	936	948	640
TLC1	1186	818	1012	1370	886	1221	1145	941
YNL159C	609	463	545	621	581	482	599	424
YAL014C	956	847	738	749	789	827	705	528
YCR020W-B	57	80	202	188	91	170	209	152
YBR243C	1294	1113	1115	1214	1190	1270	1206	835
YLR181C	563	485	564	552	499	528	530	408
YBL056W	3216	2546	3137	3236	2625	2702	3118	2143
YNL075W	395	610	979	755	288	769	807	603
YPL150W	1345	742	941	925	1092	924	1034	627
YJL012C	2030	1737	2196	2152	1581	2357	2379	1603
YJL065C	655	567.981	449.991	447	579.996	507.968	418	315
YKR020W	522	442	424	444	413	475	460	332
YMR053C	413.272	218.059	288.777	271.097	382.939	265.724	297.711	216.814
YKL066W	466	377	438	469	425	468	517	394
YMR004W	1458	1184	1255	1355	1117	1246	1398	922
YER083C	1528	1434	1218	1232	1448	1460	1125	854
YPL176C	1369	916	1054	1153	1097	1173	1075	816
YHR172W	279	225	344	379	156	301	365	291
YLR263W	243	123	296	272	140	230	312	255
YDL240W	799	712	1418	1554	615	1179	1449	1130
YDR401W	6.402	9	11	16	5	11	15	12
YGL118C	1	0	0	1	0	0	2	0
YHR013C	958	908	934	977	823	870	1048	683
YOL040C	12988	15520	13315	13074	12275	15507	13155	9176
YGR072W	571	506	687	613	494	586	695	457
YCL035C	3453	2817	1853	1935	3422	2410	1997	1423
YIL023C	1156	877	713	767	1074	832	671	568
YNR073C	90.396	90.974	56.689	60.167	118.418	88.05	53.133	44.654
YPR200C	49	64	48	50	48	73	49	45
YIL072W	108	71	74	91	91	101	111	88
YLR327C	14194	9145	4376	6153	12669	5509	3828	3007
YBR229C	1159	944	1313	1365	1048	1256	1440	917
YML133C	381.347	186.567	238.929	463.284	183.691	541.884	340.88	230.121
YOR131C	808	793	530	580	744	694	586	397
YLR455W	650	460	556	536	516	486	539	370
YNL247W	2870	2531	4001	3785	2389	3039	3973	2706
YOR054C	1228.5	740.842	714.606	664.93	1089.78	733.011	720.035	484.474
YGL007C-A	18	5	16	15	12	18	9	11
YFR028C	1110	906	968	843	872	970	900	681
YGR290W	0	0	0	0	0	1	0	0
YOR009W	300	217	260	348	168	345	285	280
YOR072W	9	11	7	9	12	11	12	21
YDR292C	1545	1438	1687	1907	1323	1840	2008	1487
YOR161C-C	3	3	6	10	4	6	4	5
YHR126C	1	6	2	2	4	7	10	2
YMR194W	2154.29	2714.4	1972.11	2158.4	1661.83	2766.24	1888.12	1329.9
YAL016C-A	3	2	1	1	6.038	4.028	0	1
YMR167W	451	239	406	434	321	348	507	322
YOR249C	341	250	496	480	277	378	523	364
YER117W	9053.22	10807.9	7390.61	7037.78	7708.15	10986.8	7111.5	4898.09
YOR301W	604	437	499	423	511	580	563	338
YPL187W	2	2	12	17	4	7	4	9
YKL218C	1354	1296	1055	1241	1116	1248	1249	899
YOR140W	754	1003.99	1171	1586	566	1187	1173	1052
YDR391C	1235	1307	897	1172	1323	1237	1137	802
YLL063C	254	191	202	196	227	280	203	173
YAR070C	0	0	0	0	0	0	1	0
YOR276W	2357	2639.99	2644	2829	1842	2792.99	2609	1857
YMR309C	1404	1654	4564	4425	906	2777	4339	3243
YOR089C	2047	1757	1439	1523	1609	1742	1409	1142
tD(GUC)N	4.5	9	10	0	0	5.5	0	6
YGR258C	1074	840	1039	998	790	1002	1084	724
YNL146C-A	14	1	23	15	11	15	19	8
YMR180C	518	376	404	434	397	456	440	340
YGL163C	743	548	708	639	558	606	616	471
tD(GUC)Q	0	0	0	0	0	0	0	0
YDR417C	11.782	5.008	4.005	4.007	4.005	1.001	4.004	2.003
YOL131W	10	6	13	6	7	4	1	3
YOR011W-A	0	0	0	0	0	0	0	0
YPL283C	1011.62	978.378	1019.94	1937.01	638.975	1462.17	1601.28	1193.26
YBL021C	360	329	261	253	260	344	292	231
YHR215W	378.784	204.77	150.313	158.642	350.43	192.637	168.034	119.639
YLL045C	14801.2	16141.1	14547	15509.6	12240.8	17452.3	13842.5	10305.8
YLR156W	28.446	22.904	24.984	35.625	24.915	32.634	32.684	25.149
YLR007W	597	610	625	675	499	744	591	483
YNL261W	301	266	491	503	256	365	538	383
Q0092	0	0	0	0	0	0	0	0
tE(UUC)Q	0	0	0	0	0	0	0	0
YNL305C	2075	1409	915	954	2156	1382	1053	770
YJL046W	452	362	448	467	394	377	467	319
YKR078W	344	332	471	570	309	371	466	420
YOR191W	1163	864	1455	1553	944	1137	1607	1097
YEL074W	65	54	62	88	56	71	79	62
tE(UUC)M	0	0	0	0	0	0	0	0.5
tI(GAU)Q	0	0	0	0	0	0	0	0
YOL166W-A	0	0	0	0	0	0	0	0
YDR272W	1893	1427	1115	1048	1747	1398	1193	894
YGR289C	1361	784	572	911	1059	857	614	616
YML020W	707	637	602	783	651	859	673	591
YLR103C	303	312	446	335	232	379	321	262
YOR294W	514	696	870	778	350	778	742	574
YEL062W	364	299	381	360	361	290	424	299
YPR064W	3	5	6	4	9	6	3	6
YPR031W	434	350	523	554	295	456	520	405
YLR038C	1771	1529	1362	1463	1884	2023	1770	1257
YNL096C	3457.09	4225.51	3728.98	4193.12	2813.27	4445.44	3723.65	2848.56
YDR038C	1884.43	1547.54	1688.86	2189.86	1288.51	2028.02	2270.46	1263.34
YPR160W-A	0	0	0	0	5.176	0	0	0
YDL187C	12	12	10	11	5	13	13	7
YBR024W	467	403	321	404	480	382	318	286
YER171W	796	649	1181	1133	569	905	1216	872
YDL047W	1696	1738	1485	1588	1402	1866	1425	1050
YML046W	410	333	891	770	355	501	946	638
YGL124C	652	439	533	563	590	552	596	432
YMR276W	3662	3489	2823	2765	3103	3025	2502	1949
YEL059W	19	18	17	15	16	29	18	12
YDL160C-A	123	136	112	109	145	132	140	106
YLR165C	292	290	313	333	275	290	337	263
YCR069W	2512	2301	1654	1847	1950	2325	1654	1234
YKL223W	0	0	1	0	0	1	0	0
YGR146C-A	6	2	3	6	4	4	2	7
YKL027W	1037	838	961	926	725	1038	898	653
YJL173C	580	652	592	547	560	563	558	387
YDR152W	1253	1176	1440	1366	953	1306	1283	1039
YKL127W	2556	2291	2427	2348	1965	2639	2555	1788
YDR309C	3334	3633	4166	3369	3031	4828	4297	2795
YLR386W	719	501	804	893	618	694	889	626
tN(GUU)Q	0	0	0	0	0	0	0	0
YLR371W	1316	979	1469	1690	1092	1331	1559	1108
YDL169C	480	509	398	395	464	434	391	306
YLR092W	412	297	320	333	322	365	337	245
YER044C	673	678	513	761	555	803	500	403
YMR072W	3017	2828	2700	2406	2985	2856	2784	1690
YJR033C	1040	633	905	1001	836	810	1068	717
YKR056W	476	837	1301	1172	326	1211	1123	853
YGL011C	3982	3590	3140	3097	3438	3414	3177	2178
YIR036C	1132	1150	724	714	1154	897	705	520
YMR123W	713	712	650	667	621	677	707	452
YDR406W	1002	998	1134	1398	772	931	1034	784
YGR073C	89	52.178	62	50.494	55	64.195	61.426	44.195
YGR209C	4672	4708	3229	3330	4340	4133	2882	2094
YJL150W	5	0	4	5	2	4	2	1
tS(UGA)E	1	3	3	5	3	1	1	5
YNL050C	361	421	505	430	294	453	498	336
YMR304C-A	1784.74	1936.86	3403.31	3418.91	1331.03	2708.05	3884.88	2430.89
YLR240W	844	527	719	737	726	713	802	591
YGR093W	391	489	822	764	327	610	714	617
YDL234C	5146	4297	3931	5859	3858	4542	4937	3711
YPR108W-A	1	0	0	0	2	2	1	0
YNL136W	993	818	836	778	795	898	752	559
YKL049C	515	406	429	424	471	471	443	332
YJR080C	1281	1168	1240	1295	1176	1338	1316.89	1009
YNR038W	412	452	871	823	342	624	820	590
YGL140C	1395	1140	1663	1644	1072	1455	1778	1244
YCL029C	901	687	711	762	738	763	702	521
tY(GUA)Q	0	0	0	0	0	0	0	0
YFL038C	6663	6231	4642	4855	6146	5765	4791	3304
YJR131W	597	487	534	649	558	540	565	409
YNR012W	423	345	602	565	285	564	563	417
YNL110C	650	875	1375	1255	413	1130	1172	917
YAL068C	0	0	1.055	0	1.036	0	0	0
YDR367W	333	279	485	594	324	323	486	318
YIL053W	6091	5906	7408	7159	4992	7072	7604	4077
YPL059W	1009	992	758	812	961	1018	800	613
YGL253W	24292	24555	20750	30164	17830	24247	19306	15722
YHL032C	3063	2489	1828	2099	2709	2422	1970	1575
YJL010C	398	532	1205	1054	280	748	1037	766
YHL045W	2	2	1	2	1	2	3	5
YOR337W	338	458	663	677	223	649	584	521
YMR010W	532	636	1375	1656	465	805	1364	1094
YOR097C	445	351	317	321	434	418	365	234
YHR118C	269	209	304	225	206	256	299	215
YGR024C	697	585	1083	946	541	882	1050	765
YOL023W	540	471	546	577	425	511	477	412
YPL253C	277	187	308	285	189	254	262	194
YOR008C-A	1	1	0	0	0	1	0	0
YER154W	1749	1777	1460	1801	1508	1680	1564	1140
YBR300C	0	2	0	0	0	0	4	5
YEL036C	2199.07	1961.87	1974.32	1919	1723.87	2295.87	1755.84	1399
YBR260C	904	732	898	929	586	838	879	630
YPL124W	200	176	172	147	179	192	161	131
YAL042W	4681.98	4749	3601.99	3914	4076.98	4674.98	3808.99	2804.93
YAL035W	4023	4140	5319	5562	2452	4789	5031	3766
YNL286W	684	465	487	461	658	524	553	369
YDR001C	5769	2649	2529	2789	5144	2812	2807	2033
YIL162W	2328	3221	1936	4457	2013	2480	1550	1681
YOL141W	50	80	167	162	41	123	191	144
YHR145C	29.533	23.383	112.246	71.375	23.823	23.094	141.654	87.894
YBR195C	318	359	381	341	264	433	347	268
YIL039W	2411	2283	2346	2475	2041	2658	2444	1648
YGR122W	663	580	674	831	564	710	753	534
YPL092W	651	485	648	733	573	734	657	549
YGR161C-D	376.47	281.657	215.777	321.786	137.993	353.508	507.984	284.736
YMR315W	3789	2583	1804	2189	3811	2690	2301	1545
YGR213C	184	155	156	194	128	182	164	139
YDR384C	736	988	772	1050	556	1043	700	575
YML007W	2664	2506	2990	3291	2055	2577	2890	2048
YER063W	1652	1717	1490	1648	1448	1787	1647	1114
YDR481C	3025	2117	1888	2050	2554	2525	2084	1509
YER014W	718	593	498	562.996	640	668	507	434
YPR041W	3057	3275	4292	4012	2273	3650	4050	3114
YNL213C	428	521	542	541	374	565	554	414
YKL006C-A	413	426	244	249	339	393	254	173
YDL159W-A	0	0	0	0	0	1	0	0
YBR058C	1234	1064	1438	1517	1050	1358	1567	1176
YLR024C	336	230	582	548	260	311	606	445
YLR071C	896	679	1400	1616	683	1121	1569	1178
YHR092C	104.108	104.016	143.063	185.886	78.017	113.99	126.006	138.464
YDL199C	439	231	284	307	458	288	339	233
YHL007C	1991	1893	2092	2234	1478	2373	2261	1657
YER181C	2	4	2	1	2	2	0	1
YNL228W	2	2	5.021	4	4.05	4	1.005	3
tV(AAC)O	0	0	0	0	0	0	0	0
YDL064W	683	757	659	698	656	828	663	485
YDL031W	851	1226	1879	1840	561	1690	1700	1329
YMR257C	350	245	618	693	265	387	675	491
YBL108W	0	0	0	0	0	0	0	0
YDR046C	1521	2407	2277	2805	1391	3031	2465	2170
YOR253W	553	544	532	508	523	648	488	337
YOR202W	829	743	563	640	694	804	636	482.762
YEL010W	0	0	0	0	0	0	0	0
YGL245W	8200	7469	8411	8862	6792	8064	8855	5877
YGR006W	211	181	172	210	162	209	186	163
YGR079W	252	394	667	517	158	603	422	467
YDL119C	342	258	229	240	342	287	217.981	197
YKL151C	1576	1160	706	847	1557	1092	854	661
YGL198W	1727.96	1577	978.959	1109.9	1670.95	1418.9	1048	782.983
YDL086W	1492.9	1635.87	1141.96	1225	1614.97	1394.94	1081.84	788.883
YBL091C-A	483	465	312	341	462	389	302	260
YLR361C-A	199	254	168	192	225	180	175	142
YBR141W-A	1	2	0	1	0	1	0	1
YOR170W	0	0	0	1	0	0	0	1
YHR038W	307	254	326	333	223	258	340	230
YML069W	2415	2134	2748	2700	1798	2550	2725	2024
YKR019C	422	442	417	473	387	419	438	303
YJR073C	12607	14163	7742	11211	11262	14172	8409	6777
YGR279C	11031	9760	12409	12789	8364	10652	11801	8374
YCR073C	316	258	411	498	196	282	381	308
YCR022C	10	12	9	9	9	12	7	7
YLL015W	1501	1164	1758	1946	1070	1416	1917	1380
YNL195C	137	119	55	42	195	98	62	54
YDL134C	2563.18	2464.26	2139.7	2475.82	2367.43	2542.93	2419.25	1853.1
YFL060C	161.969	144.887	182.742	270.938	129.808	275.131	179.835	209.866
YDR173C	345	212	227	221	273	269	295	174
YMR100W	577	490	832	773	479	574	869	566
YCL057W	3062	2760	3085	2927	2782	2858	3158	2234
YOR335W-A	0	0	0	0	0	0	0	0
YBR072W	2928	953	1104	259	3819	659	1141	482
YBR005W	1574	2455	1286	1851	1245	2143	1478	1027
YPR123C	46.731	34.676	33	59	36	43	41	40
RUF5-2	996.235	1808.4	1810.87	2491.59	832.671	812.56	700.411	698.208
YDL173W	2529.99	2484.97	1957	1865.98	2442.98	2495.98	2059.99	1353.99
YJR047C	29.021	36.008	25.01	46	35.019	22.01	30	24.005
YMR006C	1995.19	1860.85	1828.22	2971.07	1071.15	2140.23	1627.17	1245.2
YKL145W-A	54.691	50.253	30.728	25.839	47.882	49.057	22.205	10.679
YAL016W	3327	2357	3139	3299	2944.96	2764.97	3486	2416
YMR292W	327	308	686	578	259	406	599	400
YHR011W	345	307	280	328	264	282	294	247
YPL152W	586	333	348	366	490	339	378	246
YLR183C	927	758	940	843	719	904	894	606
YNL077W	3480	1747	1316	1344	2904	975	769	660
YBR109C	2776	2650	2478	2518	2453	2745	2466	1724
YBR172C	1386	1453	1892	1778	890	1914	1840	1313
YDR346C	2282	2106	2877	2814	1645	2517	2843	2130
YAR002C-A	3677	3051	2976	2803	3277	3433	3337	2119
YOL077W-A	1463	1299	1148	1006	1707	1875	1596	1148
YPL029W	340	365	430	458	293	408	378	295
YHR146W	4021	3278	2896	2372	3864	3152	2991	1651
YNL019C	0	0	0	0	0	0	0	0
YDL242W	3	2	2	4	6	7	5	1
YBR189W	13718.7	16604.3	14564.9	15411	11945.9	17353	14846.3	10768.6
YER085C	5	2	7	10	5	7	4	5
YJL225C	1555.29	2243.07	2224.28	2621.01	1659.13	2819.27	2359.13	1842.42
YKL064W	2710	1533	1946	2337	2042	1936	2266	1591
YLR265C	322	275	531	573	282	332	554	408
YKR022C	685	635	600	636	508	717	647	489
YLR287C	357	380	732	599	273	571	671	453
YPL174C	354	292	696	691	306	425	788	571
YOR070C	1007	769	766	894	810	910	809	599
YDR403W	71	103	108	110	97	90	78	82
YOL093W	455	383	509	411	347	502	440	339
YOL042W	479	424	569	602	417	577	629	480
YIL070C	1106	1131	1087	1277	797	1097	934	841
YCL037C	16	13	29	22	15	20	21	12
YIL025C	5	8	4	2	1	3	3	5
YDR545C-A	3.998	16.978	23.389	4.844	11.792	0	22.088	8.152
YNR071C	24	34	38	35	29	41	33	29
YML131W	1214	1244	1212	1149	1240	1033	1083	838
YNL245C	413	340	404	351	376	366	436	279
YNR024W	321.922	327	366.766	269.8	253	319	336	214
YFL013W-A	4	3.004	6	3.003	1.003	6.02	4.004	1.002
tP(AGG)N	0	0	0	0	0	1	1	0
YLR329W	15	21	29	38	20	34	33	29
YPL043W	640	1020	1854	1767	350	1343.99	1484	1220.99
YCL045C	3161	2996	3168	3701	2462	3746	3621	2719
YBR056C-B	1.001	2.005	2.019	1.002	1.002	2.003	0	1.005
YKL002W	1858	2003	1455	1522	1640	1852	1570	1121
YDR328C	2508	2417.95	1695.99	1919.99	2163	2291	1676	1406
YIR009W	169	165	119	113	150	146	105	91
YBR154C	1320	1254	1685	1565	979	1476	1583	1103
YLR001C	902	610	850	928	791	822	1033	689
YAR035C-A	0	0	0	0	0	0	0	0
YKR101W	367	236	323	283	269	282	331	190
YMR230W-A	0	1	8	4	0	3	7	5
YER115C	359	316	329	367	288	327	370	263
YHR124W	126	152	171	153	123	164	158	102
YER148W	1428	1579.94	1819	1750	1265	1896.98	1681.99	1239
YCR050C	0	0	1.072	0	2	2	0	1
YMR240C	446	409	404	421	375	493	432	296
YOR303W	3102	2863	3870	3585	2023	3192	2838	2387
YIL087C	529	446	279	336	558	403	279	219
YMR192W	572	405	758	746	474	554	796	529
YCL074W	0	0	0	0	0	0	0	1
YJL221C	312.613	236.439	256.63	283.42	308.379	214.278	291.012	192.293
YMR229C	1518	1267	3468	3282	664	2105	3280	2398
YLL038C	389	299	319	439	244	430	365	333
YOR056C	1006	1016	1365	1263	743	1219	1253	940
YOL108C	688	644	427	529	574	591	537	382
YOR270C	7223	5514	6938	7607	5804	6860	7510	5090
YDR106W	23	21	36	28	26	26	22	32
YOL068C	1475	1387	1874	1788	1202	1533	1737	1292
YMR182C	255	271	300	374	176	348	221	251
YBR201W	827	421	514	551	674	542	670	422
YLL043W	2201	2077	2043	2336.71	1695	2488	2059	1608
YDR415C	687	642	544	586	630	732	622	451
YGL161C	2028	1649	1283	1446	1921	1741	1395	1022
YOL133W	458	502.999	421	395.997	440	461	391	283
YDL074C	999	915	1586	1678	679	1123	1594	1161
YNL263C	1422	1307	1269	1224	1287	1488	1150	810
YHR217C	22.584	26.946	12.284	25.854	19.711	20.945	20.868	17.091
YDR128W	971	880	1262	1311	826	1129	1456	1030
YOR193W	183	171	292	347	189	183	333	231
YER028C	80	103	64	90	71	72	88	59
YMR052W	144	95	214	220	160	150	204	135.824
YIL029W-A	0	0	0	1	0	0	0	0
YMR294W-A	7.005	2.003	5.002	3.009	3.007	4.003	7.007	4.015
YKR076W	1141	989	762	790	938	894	795	570
YDR225W	8854.46	10275.4	7540.16	8480.25	6339.38	9491.54	7058.9	4933.69
YDR270W	917	1081	1367	1296	696	1467	1242	1019
tL(UAG)J	30	10	18	13	19	17	10	6
YPR033C	3624	3448	4055	4236	2779	4057	4160	2857
YGR230W	289	182	197	193	257	197	183	127
YPR062W	1439	1580	1255	1441	1330	1575	1150	945
YDR528W	388	270	606	385	290	447	463	323
YER173W	412	402	568	488	316	537	621	390
YBR026C	2121	1790	1479	1546	2119	1718	1607	1177
YDL185W	9459	7168	9752	10672	7711	8474	10106	6953
YBR091C	222	164	148	136	182	162	124	92
YNL094W	1575	1474	1613	1807	1151	1567	1682	1239
YGL056C	1085	1588	1867	1848	914	1857	1859	1390
YPL227C	593	578	759	676	533	758	706	560
YLR222C-A	1	7	35	25	1	10	23	21
YDL010W	1250	1223	1102	1410	979.998	1404.99	1339	1020
YML019W	542	565	843	929	505	693	826	627
YDL045C	1030	849	837	892	836	949	940	640
YLR163C	947	944	904	948	774	921	853	641
YLR178C	2905	1760	867	873	3439	1401	938	786
YKL225W	0	0	0	0	0	0	0	0
YHL002C-A	3.007	2.016	0	1.002	1.002	1.003	4.024	3.035
YJL175W	0	1.003	0	0	0	0	0	0
YBL079W	868	669	1617	1523	573	1048	1672	1174
YNL056W	758	688	551	616	669	615	560	371
YFL001W	450	615	660	704	351	745	641	469
YDR150W	1933	1321	2043	2403	1428	1824	2471	1663
YER147C-A	4.004	19.058	4.003	1.002	5	11.019	10.009	3.003
YKL170W	704	655.993	501.999	548.991	537.961	537	520	393
YPR157W	220	112	92	104	167	142	135	74
YPR137C-B	1346.37	1464.42	0.002	100.521	1680.3	583.557	0.001	0
YLR384C	1852	1437	2904	2826	1236	1984	3127	2058
YPL060W	351	265	345	301	353	324	338	215
YML099C	810	719	997	945	604	901	1044.92	785
YLR421C	1464	1384	1407	1290	1280	1334	1308	921
YLR090W	583	645	588	642	491	533	473	389
YMR325W	0	0	0	1.26	0	0	0	0
YJR064W	3219	2857	3820	3443	2319	3318	3541	2494
YML022W	1373	1678	1849	1826	1235	1863	1745	1143
YER046W	404	422	288	363	350	416	320	249
YMR029C	1330	931	1273	1312	1093	1113	1373	933
YIR030C	32	65	103	97	50	100	120	83
YKR050W	812	642	719	723	655	694	800	586
YMR121C	903.141	875.831	721.697	694.712	808.917	811.598	758.734	507.862
YGL017W	512	525	411	459	443	468	417	326
YDL150W	689.998	777	853	732	479	859	813	585
YNL038W	393	366	537	571	335	469	558	419
YHR001W-A	1102	866	1049	1066	1309	1343	1394	1053
YOL165C	7.505	3.652	6.927	5.908	2.46	9.641	9.135	9.091
YIL139C	209	190	328	277	207	230	330	203
YLR246W	723	585	547	587	584	595	521	387
YJR119C	231	194	396	319	147	295	351	266
YLR359W	6942	5299	7399	7132	5819	7124	8783	5498
YLR199C	1050	772	925	827	894	813	937	580
YJL206C	338	252	359	382	313	303	342	293
YIL142W	3623	3550	4069	3737	2789.99	3845.99	3786	2629.99
YGL082W	1455	1100	1114	1259	1186	1247	1191	875
YNL138W	4305	3612	3727	3755	3893	3967	3994	2698
YOR133W	25066.3	22692	24963.3	26033.4	19842.4	24307.7	26095.8	17132.3
21S_rRNA	48	34	39	45	38	40	34	36
YGL142C	651	519	830	865	587	655	882	626
YGR179C	417	343	398	391	372	451	392	290
YGR102C	500	441	330	396	482	402	344	272
YBR139W	3850	1880	1562	1803	3739	1939	1880	1299
YHR188C	3231	2615	2457	2587	2833	2987	2719	1752
YKL106C-A	2	1	1	4	0	0	2	1
YNL116W	687	507	642	525	540	635	538	415
YNL139C	842.969	626.017	1324.85	1561.81	738.568	871.465	1680.4	1067.93
YDR361C	560	687	1059	964	459	836	1017	776
YLR445W	0	1	0	2	0	0	2	0
YGL255W	2824	3741	3841	3012	2209	5872	4042	3155
YFR007W	378	363	311	407	366	298	345	269
YLR333C	2459	2416	2213	2130	2063	2748.17	2104	1660
YHR103W	1305	969	1574	1510	1043	1403	1708	1221
YHL030W	823	652	1333	1064	558	746	1235	829
YGL077C	3122	2886	3815	3720	2450	3867	4089	2929
YPL204W	3489	2795	2968	3152	3000	3490	3160	2328
YPL251W	2.01	3	1	2	1	1	1	2.015
YIL009C-A	336	211	272	225	302	275	254	191
YOR091W	898	821	1073	819	668	1015	910	716
YGR026W	1643	1446	2338	2070	1554	1928	2380	1670
YAL040C	1136	1438	1678	2384	927	1840	1922	1550
YDR288W	579	404	464	426	485	454	416	342
YGL208W	867	570	453	505	823	526	504	352
YNL284C	1068	1039	936	1011	872	1037	977	743
YIL164C	426	305	278	276	329	367	282	247
YOL143C	2225	2475	1637	2129	2049	2153	1725	1218
YBR237W	896	731	841	927	751	974	954	730
YBR197C	399	354	326	352	347	416	335	253
YHR147C	843	728	560	657	678	752	565	417
YJL093C	1357	1156	1213	1472	1183	1374	1292	1089
YPL126W	1055	1085	2523	2512	656	1784	2375	1783
YMR317W	31.005	19	19	30	28.005	36	19	21
YOR251C	1342	1220	1143	1207	1115	1342	1063	773
YPR181C	6565	4682	5317	5494	5201	5507	5556	3892
YCL008C	822	660	607	543	627	629	550	448
YOR107W	494	868	1021	1131	339	1325	977	951
YML005W	285	260	368	354	243	358	367	267
YNL215W	1188	992	853	867	1044	980	864	647
YCR075W-A	229	249	167	168	232	244	156	137
YDL059C	157	153	148	168	175	160	124	107
YOR204W	2954	2755	4097	4063	2261	3576	3765	2760
YEL012W	1757	1302	889	979	1643	1222	1095	769
YBL040C	1640	1172	1651	1535	1698	1697	1942	1093
YPR043W	8799.47	10009.7	7308.77	7894.58	7489.67	9903.75	7059.18	5131.67
YDR382W	10212	10435	11101	10902	8656	10728	10527	7431
YDR483W	6440	6235	5762	6912	5310	7564	6490	4644
YER061C	566	427	458	450	448	471	483	355
YLR022C	427	373	471	337	316	477	419	292
YLR402W	62	70	59	92	53	82	59	68
YLR073C	39	84	196	120	39	171	116	109
YER183C	460	467	399	424	440	444	413	292
YHR090C	453	393	445	406	350	437	421	307
YOL021C	1444	1545	2157	2162	988	1970	2101	1586
YHR030C	2522.5	1577	2215	2321	2166	1948.77	2421	1634
YBR295W	622	475	724	750	500	632	767	599
YKL018W	336	377	396	363	340	402	364	281
YIL011W	73	115	87	122	71	110	76	81
YEL034W	9631.96	8358.94	7216.97	7034.95	7361.95	8637.96	6907.98	5093.96
YHL015W	12265	12423	10622	11802	10352	14030	10834	7986
YNR050C	1945	1924	1793	1902	1582	1823	1611	1283
YDR134C	3701.59	1787.13	1876.71	2186.82	3285.1	1714.06	1372.83	1853.68
YKL208W	452	366	292	310	349	335	279	216
YGR004W	312	255	322	325	255	367	360	232
YML110C	2339	2425	1853	1864	2186	2100	1722	1214
YGL048C	5089	4556	4145	4070	4267	4475	4318	3005
YGL243W	311	326	422	437	263	365	406	356
YKL106W	486	385	570	430	358	547	511	341
tN(GUU)N1	26	11	10	3	12	9	9	2
YPR029C	1621	1257	2171	2256	1416	1697	2502	1654
YJL034W	52677	18996	24516	21102	40105	21912	26094	13350
YFL048C	1899	1583	1666	1656	1602	1840	1752	1177
YLR117C	802	706	1081	992	617	867	985	750
YOR176W	2715	2205	1982	2223	2753	2463	2448	1664
YOR109W	1281	957	1541	1611	1043	1187	1651	1238
YBL089W	557	458	450	579	500	505	549	378
YDL084W	6637	6178	8541	7902	6142	7142	8940	5520
tC(GCA)Q	0	0	0	0	0	0	0	0
YGL116W	1136	569	708	651	895	665	748	505
YNR034W-A	1731	847	287	465	2345	755	456	342
YCR024C	346	278	411	401	329	301	364	335
YIL102C-A	144	135	168	224	139	164	227	132
YMR102C	1265	1290	1128	1624	920	1255	1208	1010
YCR071C	612	616	431	487	522	544	448	307
YDR175C	779	852	762	846	680	829	631	586
YOR189W	457	507	393	383	434	471	421	329
YOR154W	346	324	661	611	291	554	668	472
YPR121W	552	522	517	539	435	728	630	438
YBR070C	525	513	401	435	502	585	419	302
YOR396C-A	0	0	0	0	0	11.787	0	0
YLL017W	3	3	5	3	2	8	4	3
YDR351W	658	554	997	973	468	775	969	700
YNL315C	1367	1371	1055	1435	1114	1431	1035	812
YPR174C	465	478	425	432	381	414	375	261
YJR045C	32931	22993	19598	21474	25695	16707	13936	11384
YMR008C	6667.81	5522.15	5145.78	7176.93	5031.85	6249.77	6366.82	4567.8
YDR349C	2132	1686	1862	2060	1684	2220	2012	1415
YDL171C	4120	2827	4080	4988	2648	4217	4713	3402
YKL062W	1371	812	1035	1142	1190	1130	1087	900
YJR010W	648	536	646	456	539	529	711	445
YJL218W	32	39	26	50	36	52	42	25
YIL126W	1821	1524	2243	2396	1270	2008	2460	1695
YDR093W	1516.07	1187.12	1782.2	1995.53	1140.54	1483.12	1921.97	1358.69
YMR282C	574	527	686	764	464	688	716	552
YIL109C	5384	3629	5115	4846	4492	4345	5406	3511
YFL022C	4751	4130	4344	4275	3636	4715	4457	3068
YPL109C	593	390	492	553	546	494	641	417
YJL156C	585	553	832	770	494	733	890	542
YNL071W	6745	6934	5222	5626	7050	6217	5589	3756
YMR088C	1242	1224	1488	1638	1157	1604	1763	1205
YGR211W	4061	3503	3782	3122	2935	2151	2018	1554
YKL139W	365	373	628	524	260	388	547	345
YJL069C	232	422	877	697	146	644	585	549
YDR323C	218	197	230	247	207	221	254	168
YDR344C	12	6	18	17	13	14	27	18
YJL016W	1148	662	875	905	872	800	956	731
YDR444W	874	727.993	744.982	715	630	787	757	505
YPL189W	38	27	28	49	24	38	46	35
YLR285W	648	674	913	931	546	749	926	673
YLR267W	108	100	144	168	117	115	180	150
YDL219W	230	281	372	353	260	309	389	291
YNL017C	0	6	4	2	1	4	3	3
YCR024C-A	876.791	855.616	1991.1	1729.76	784.229	937.438	2010.3	1280.77
YCR024C-B	1190	993	4625	4076	875	1152	4150	2824
YKR024C	191	394	817	641	97	634	634	479
YBR156C	509	346	455	383	381	417	463	320
YOR076C	365	269	569	535	317	362	606	432
YEL059C-A	193	202	171	156	199	190	163	115
YDR405W	1013	1209	834	1002	1012	938	831	593
YOL091W	48	27	107	119	36	58	91	75
YCL031C	780	753	1305	1186	580	996	1173	875
YIL027C	490	375	554	515	370	484	539	374
YLR459W	556	448	859	994	471	634	965	685
YNL243W	3826	2888	2862	3193	3030	3462	2965	2234
YNR026C	972	704	946	883	793	879	924	634
YHL044W	71	71	71	97	74	72	61	76
YPR204W	6339.49	6293.32	5828.66	5975.92	5366.2	6830.26	6201.95	4154.8
YNL297C	806	571	1697	1735	645	831	1903	1239
YBR170C	1041	914	1134	963	896	861	1070	744
YGR149W	821	517	922	1011	792	789	1095	797
YDR458C	955	840	1391	1306	801	1133	1352	973
YKL193C	1225	904	1104	1132	1296	951	1250	771
YPR099C	10.033	11	8.057	19.041	13.052	13.068	13	7.043
YOR135C	4.019	1.002	0	1.002	2.006	1.002	3.024	1.004
YLR310C	1896	1279	2815	2922	1283	1931	2837	1967
YNR008W	829	607	694	742	647	704	669	550
YJR150C	3	5	1	5	2	4	1	0
YBR301W	1.297	11.604	2.646	1.337	13.429	4.018	1.262	5.086
YLR003C	322	337	749	627	261	438	707	550
YER113C	792	605	1018	852	574	830	999	700
YHR122W	451	521	458	525	328	472	430	333
YHL017W	781	584	805	817	648	776	893	672
YJR010C-A	324	362	356	418	315	391	374	276
YIL085C	1254	1073	1248	1247	998	1241	1319	932
YMR190C	579	470	687	686	440	533	682	510
YLR325C	5322	6675	5564	5547	5172	7039	5521	3745
YCL076W	0	0	0	0	0	0	0	0
YOR272W	769	886	1400	1267	555	1066	1245	921
YOR058C	596	376	705	644	460	535	752	585
YER172C-A	0	0	0	0	1	0	1	0
YAL064W-B	35	25	21	26	28	18	30	13
YDR413C	2.006	2.008	3	1.002	6.015	2	2.002	3.011
YBR203W	721	334	564	751	515	500	569	566
YAR029W	23	15	19	20	18	25	16	14
YNL238W	1745	1347	1632	1568	1309	1755	1596	1306
YJL198W	1479	1367	1660	1825	949	1772	1719	1255
YOL135C	370	260	230	245	331	283	222	189
YOR323C	3305	2819	2934	3015	2697	2934	2975	2114
YLL041C	3564	2747	2208	2378	3907	4060	3080	2445
YKR074W	1343	964	879	878	1193	1198	973	719
YMR274C	269	208	262	294	189	307	313	200
YER026C	4691	5098	4915	6101	3955	5758	5250	3870
YMR201C	531	448	395	366	476	404	408	273
YLR069C	1837	1609	1511	1811	1322	1662	1419	1158
YML042W	311	288	240	347	302	284	313	258
YMR050C	1045.86	723.413	523.93	679.928	1194.38	938.35	970.057	630.064
YDR069C	783	393	849	752	649	541	956	591
YOR298W	23	32	77	64	18	40	63	50
YEL066W	493	473	290	340	471	471	306	237
YPR035W	16247	21691	15935	16880	11399	24848	16415	12567
YDR014W	178	106	286	362	123	177	318	256
YDR227W	665	603	1140	910	504	732	1074	727
YPR060C	369	380	556	466	345	479	591	419
YMR037C	1241	1070	1584	1642	999	1343	1652	1291
YCR038C	324	245	292	320	289	286	310	243
YNL257C	1156	714	1355	1494	838	979	1477	1032
YCR072C	168	407	693	521	107	596	518	420
YBR093C	458.552	404.035	418.486	405.81	400.099	493.319	389.236	302.393
YNL092W	286	199	200	176	285	236	195	149
YGR045C	16	12	18	26	14	16	18	14
YAL037C-B	13.015	10.013	7.009	6.008	13.024	10.013	6.009	2.004
YLR134W	579.014	435.743	572.977	630.18	417.776	605.86	589.956	409.844
YOR218C	0	1	0	0	0	0	0	0
YMR203W	3363	3387	3313	3731	2891	3656	3224	2303
YKL096C-B	4	3	3	1	3	1	3	1
YPL225W	2443	1923	1763	1680	2001	2163	1926	1300
YPL270W	1619	1380	1498	1673	1423	1726	1667	1173
YDL012C	1044	903	702	755	823	924	661	529
YDR218C	8	9	14	19	9	4	8	7
YLR299W	2464	2059	1643	1803	1738	2022	1703	1240
YFL003C	34	38	62	57	50	35	73	37
YPL051W	312	337	310	361	281	377	295	242
YNL054W	1067	812	1144	1116	930	1014	1376	770
YDR156W	429	482	559	465	325	496	500	367
YPL062W	3	2	1	0	6	1	0	2
YPR155C	908	585	828	877	800	766	911	675
YOR137C	697	645	677	1005	545	705	778	693
YKL123W	153.591	95.602	115.059	118.706	122.949	124.887	161.214	94.416
YKL172W	1031	1454.74	2314	1990	708	1801	1705	1469.79
YNL336W	1571.61	1206.17	1280.11	1655.56	1401.01	1448.34	1644.63	1062.55
YDR305C	419	377	349	410	410	402	412	261
YJL057C	1196	640	762	680	1124	762	794	524
YPR100W	1062.97	1125	850.943	911.959	874.948	1023.93	793	597.957
YDR358W	1744	914	832	957	1495	904	971	670
YJL152W	16.009	13.008	7	5.007	10.004	16.004	7.002	8.02
YLR096W	959	931	1346	1370	702	1134	1279	982
YDR194W-A	0	0	0	0	0	0	1	1
YKR052C	485	355	305	414	352	430	373	262
YLR427W	1264	1237	1349	1288	1042	1309	1374	944
YDL152W	2.004	3	2.007	0	1	0	2	0
YGL015C	6	7	6	7	5	4	15	5
YEL064C	341	318	398	398	332	374	378	299
YMR127C	162	216	324	278	132	277	229	233
YIL140W	2574.89	1834	2438	2053	1997	2686.82	2458	1642
YOL163W	91	112	80	99	66	108	100	100
YLR197W	2407	3188	6064	5499	2195	4287	5909.99	3647.97
YBR213W	157	200	169	185	109	169	174	127
YAL064W	2	2	2	7	6	6	8	11
YJL204C	298	215	594	563	285	295	694	396
YLR244C	2717	2463	2940	2875	2054	2940	2875	2143
YJR084W	659	583	549	546	591	623	552	378
YLR233C	349	273	471	523	263	393	520	363
YDL238C	399	289	239	253	396	275	271	185
YGL084C	1143	897	1431	1473	1138	1150	1641	1091
YLR382C	1039	955	1085	1222	896	1164	993	892
YLR154C-H	10	0	2	1	1	7	1	10
YLR154C-G	242.839	232.277	103.739	116.451	259.931	242.509	116.047	67.552
YGR238C	611	352	562	543	441	435	484	421
YDR363W	543	390	590	601	464	454	592	406
YNL114C	6	11.024	9.013	7.015	3	4.013	9.016	8.022
YNL163C	1084	1049	1376	1477	690	1288	1366	1068
snR55	2	1	8	6	3	1	9	6
snR54	0	0	10	5	0	0	4	7
snR57	4	6	8	14	4	5	11	8
snR56	1	0	0	1	0	0	1	0
YHR009C	1785	1518	1430	1262	1717	1382	1508	967
snR50	4	5	5	10	1	8	10	5
snR53	0	0	0	1	0	1	3	0
snR52	0	0	0	0	0	3	0	0
YFR050C	3140	3212	2845	2654	2833	2783	2620	1814
snR58	0	0	0	0	0	0	0	0
YLR331C	1.007	0	0	3.019	1	0	2.012	2.015
YNR069C	659	270	323	287	473	225	239	206
YOL058W	1262	930	1221	1327	998	1313	1177	1010
YAR019C	486	365	398	431	478	390	388	360
YOR024W	1	5	1	2	1	1	0	0
YML129C	722	746	497	548	737	633	426	337
YGL257C	1242	989	1703	1608	963	1296	1755	1164
YGR020C	2812	2888	2406	2470	2557	2771	2356	1704
YOR093C	624	474	935	1016	470	599	930	707
YAL046C	372	417	258	282	361	382	252	204
YOR392W	2	1	6	4	5	5	4	4
YAL039C	1119	1252	929	1106	909	1058	687	625
YGR100W	1201	946	1185	1199	1041	1096	1232	921
YLR403W	1275	961	1411	1827	860	1379	1408	1118
YOL118C	10	11	12	13	7	17	12	11
YDR286C	190	188	151	160	194	176	158	107
YHR141C	9055	9018.27	6168.43	6137.28	6789.14	10046.3	6307.95	4510.44
YPL128C	585	422	591	607	386	584	606	446
YJL091C	875	443	999	887	793	599	1278	655
YBR191W	9087.76	10917	9476.96	9964.97	8065.74	11683.3	8937.27	6611.98
YDR380W	1999	2117	2318	2192	1623	2892	2731	1795
YGR191W	1788.99	1719	1971	2121	1322	2346	1982.99	1510.99
YGR047C	650	529	891	807	470	676	794	597
YDR485C	940	883	902	923	854	1043	1034	679
YPL239W	1131	960	1017	920	1043	807	786	614
YPR183W	3779	3384	3183	2975	3639	3214	3039	1883
YOR206W	1137	1145	2965	2806	666	1770	2658	1978
YEL049W	21.31	22.72	8.931	18.194	17.287	11.474	8.849	16.83
YOR391C	16.689	19.731	5.314	4.395	2.346	25.309	3.833	7.785
YDR525W-A	205	207	279	304	237	288	363	205
YBR089W	1	2.007	3.019	0	1	4.011	1.001	4.038
YLR075W	28011	32520	24133	25563	24822	33258	23394	16899
YBR054W	386	184	222	83	524	164	206	100
YLR020C	698	600	861	876	522	826	826	621
YNL217W	1434	1032	1138	982	1154	1154	1342	834
YLR404W	206	186	284	311	186	239	277	239
YLR154W-A	0	0	0	0	1.016	0	1.089	0
YIL013C	267	173	235	253	255	211	177	173
YPL206C	1465	1196	1130	1096	1359	1310	1249	817
YDL060W	895	1056	1617	1588	537	1409	1504	1247
YBR293W	619	646	887	955	475	808	989	702
YNR052C	1221.45	1221.82	1152.46	1171.66	1026.08	1369.52	1211	851.808
YHR032W	1193	974	1061	1045	794	1212	970	868
YEL032W	963	1109	1326	1379	758	1375	1280	1075
YOL076W	314	273	715	723	226	416	747	531
YDR136C	1	1	1	3	0	2	1	1
YHR203C	11365	12373.9	10971.8	11360.2	9578.84	13100.1	10374.7	7524.68
YJL136W-A	0	0	1	0	0	0	0	0
YML112W	504	423	447	430	383	441	392	247
YLR154W-C	6.015	1.002	3.012	3.005	2.01	4.013	7.041	0
YGL241W	638	444	793	903	470	580	859	664
YDL071C	8	1	11	5	14	7	10	2
YPR176C	719	696	630	641	710	856	625	435
tS(UGA)Q2	0	0	0	0	0	0	0	0
YDR057W	721	546	730	723	585	732	805	562
YJL036W	1393	1007	1031	1073	1162	1006	1071	781
YDR521W	2	1	0	1	0	0	2	1
YER009W	3089	3002	3692	3835	2621	3313	3753	2669
YLR115W	724	553	765	870	519	699	741	598
YLR140W	3.168	3.495	2.356	1	1.059	2.283	3	1.064
YGL114W	1220	1082	1167	1228	955	1357	1210	958
YER167W	984	862	925	1129	907	1127	1064	764
YMR104C	2417	1022	1081	1548	2461	1195	1178	1030
YER185W	139	184	196	269	94	177	205	193
YDL195W	5962	3927	5355	5624	4536	4917	5970	3981
YNL199C	1176	841	995	870	907	1061	922	627
YCR026C	1466	1141	1308	1384	1150	1354	1305	934
YBL052C	638.979	594.947	955	822.952	466	730.992	896	586
YBR076W	20	7	14	8	12	5	17	15
YNL317W	552	439	490	491	528	520	550	366
YLL019C	2200.97	1381.12	1779.21	1943.87	1558.37	1942.72	2107.39	1532.33
YOR156C	352	339	429	409	304	385	415	322
YHR052W	397	797	1641	1503	267	1147	1390	1233
YKR026C	683	711	888	727	592	852	856	644
YJR043C	367	422	550	527	248	506	548	409
YJR012C	329	262	230	233	295	326	261	176
YKL060C	104577	85545	66080	82236	92036	88625	70250	46781
YCR044C	887	881	803	817	785	934	778	567
YKL035W	15617	7650	5941	6390	15553	7747	6685	4614
YLR264C-A	1	5	4	9	1	4	8	1
tQ(UUG)B	0	0	0	0	1	0	0	0
YNL073W	2685	2795	2297	3327	2125	2795	2219	1963
YMR280C	839	505	668	884	695	666	823	737
tQ(UUG)L	0	0	2	0	0	0	1	0
tQ(UUG)Q	0	0	0	0	0	0	0	0
YFL020C	39	40	34	43.755	48	47.044	26	25.055
YNL328C	67	35	33	49	51	58	43	43
YJL014W	3243	3395	3785	3731	2535	3593	3680	2618
YMR031C	5969	3389	3190	3908	5027	3374	3384	2647
YOR174W	815	883	709	721	764	875	905	587
YPR149W	6803	2182	2119	1460	6909	1673	1771	1372
YNL015W	3737	3164	1993	2433	3912	3597	2847	1864
YCR084C	3967	2961	3253	3478	2808	3188	3093	2469
YHR178W	581	425	407	499	478	454	368	309
YHL050W-A	0	0	0	0	0	0	0	0
YDR260C	361	406	373	369	291	382	313	247
YLR283W	366	285	389	380	341	309	397	301
YPL170W	694	593	476	467	690	603	431	326
YPR001W	150	134	126	127	134	147	130	93
YDR204W	1016	731	587	580	899	692	591	421
YBR085C-A	3907	2539	1956	1648	3716	2282	2097	1470
YDR251W	3101	2149	3033	3380	2623	2820	3821	2481
YNL048W	861	792	1158	1220	750	1064	1228	885
YML057C-A	4	4	5	2.007	8	3	1	2
YOR074C	696	719	687	625	611	701	630	481
YPL028W	6191	6576	4873	5656	5614	6968	6045	4065
YJR152W	508	364	459	431	387	509	501	337
YKL025C	944	965	1233	1404	807	1079	1405	1015
YAR008W	187	287	374	299	151	334	280	262
YOR003W	314	246	233	250	293	262	263	180
YOL097C	2580	2428	2708	2519	2106	2635	2674	1899
YOR110W	795	662	697	776	606	690	770	518
YDR407C	952	729	1553	1351	717	1063	1654	1034
YNR020C	309	445	392	393	290	406	340	264
YBR258C	124	131	122	100	140	125	121	95
YNL146W	15	6	38	33	16	7	32	20
YFR019W	957	669	1260	1269	718	887	1438.11	922
YLR262C-A	2209	2200	1435	1355	1729	2280	1502	1028
YIL115W-A	1	0	0	0	0	0	0	0
YBR223C	445	387	386	448	427	413	417	310
YNL241C	6519	5255	3978	4167	5736	4379	3839	2746
YJL154C	1820	1340	2161	2193	1396	1640	2517	1563
YDR091C	1534	1356	2730	2397	1023	2074	2549	1893
YJL123C	2950	2355	2169	2167	2466	2346	2361	1605
YHR066W	151.511	413.36	920.662	749.716	97	752.845	663.745	596.82
YPL047W	230	254	293	295	204	303	264	196
YER086W	3545	3315	4021	4423	2543	4208	4034	3076
YLR287C-A	7335.81	7744.23	6475.81	6598.72	6401.38	7944.49	6713.89	4753.65
RPR1	38	52	16	14	39	63	14	9
YBR176W	445	310	339	317	345	342	351	249
YDR207C	1186	799	801	786	863	880	758	557
YKL125W	448	360	663	593	282	580	606	515
YDR373W	959	730	809	749	841	826	873	569
YGL238W	1049	912	2234	2330	849	1174	2320	1672
YLR190W	1912	1466	1780	1776	1499	1650	1916	1315
YNL128W	93	69	69	92	64	85	78	47
YLR312C	836	373	310	393	734	404	353	276
YKL191W	933	840	1155	967	677	1019	944	725
YNR006W	1652	1613	1467	1893	1323	1798.99	1681	1248
YHR120W	338	359	555	612	236	474	572	411
YAR050W	226.928	133.564	161.338	220.86	171.772	199.04	184.118	179.096
YOL137W	462	398	618	628	393	512	601	443
YDR530C	1167	1044	821	853	1056	1091	904	680
YER111C	274	202	468	446	244	268	471	317
YER144C	1701	1492	1670	2065	1143	1608	2023	1373
YOL039W	6506.71	6588.73	5362.86	5580.09	5254.11	6736.45	5021.6	3800.22
YIL083C	788	712	915	1002	654	861	958	684
YHL011C	2030	2021	2511	2610	1559	2505	2634	1825
YFR010W-A	1	0	2.121	0	0	0	0	1
YGR184C	1375	1140	2149	2098	966	1430	2176	1504
YMR303C	724.227	856.119	481.977	935.677	577.015	738.635	616.468	470.254
YDR307W	705	496	794	867	558	596	901	639
YDR411C	2976	1813	1607	1855	2814	2243	2143	1251
YBR205W	1797.4	1496.7	1598.47	1579.74	1497.64	1687.45	1844.42	1181.08
YOR321W	1673	1078	1234	1311	1390	1409	1643	874
YMR186W	47991.5	33002	37730.5	37098	35604.7	24383.1	22117.2	17595.2
YMR278W	1088	621	667	732	969	729	769	569
YLR136C	892	1144	1356	1646	639	1312	1171	922
YGL260W	0	0	0	0	0	0	0	0
YMR207C	538	426	821	772	409	576	816	583
YML015C	681	602	625	649	551	655	645	427
YOR197W	3659	3796	3300	3746	3105	3887	3545	2534
YKR089C	2826	1881	2135	2231	2407	2035	2499	1686
YDL041W	2	1.023	1	1	0	0	2	0
YKR072C	980.458	1120.14	1219.39	1309.05	767.192	1302.99	1254.96	969.526
YDL014W	4350	5438	7436	6905	3093	6062	6164	4783
YML040W	0	0	0	0	0	0	0	0
YJL127W-A	1	4	0	2	1	1	1	0
YER079W	1011	645	504	512	1046	535	522	344
YER024W	648	585	595	699	543	754	613	539
YOR230W	9415	6832	4862	5453	8176	6191	4931	3711
YGR234W	3186	3298	4200	4864	2667	4139	4311	3564
YMR178W	935	905	883	1037	936	1010	982	717
YPR037C	1061	1352	890	964	984.999	1213	869.997	672.993
YEL068C	216	215	202	210	192	217	181	129
YNL090W	776	631.998	614	555	629.999	696.995	693	457.992
YOR307C	647	509	756	751	607	614	725	519
YMR225C	606	752	547	624	554	676	567	424
YBR095C	684	637	763	769	595	721	913	546
YDR036C	1022	1006	1154	1161	779	1038	1067	732
YGR043C	703	729	688	435	963	778	877	551
YPL223C	107	109	104	73	125	87	102	88
YPL272C	168	148	269	276	129	262	336	272
YPR002C-A	34.519	25.736	87.094	94.385	43.198	46.019	76.63	62.359
YOL002C	785	810	1502	1428	687	1061	1619	1097
Q0032	0	0	0	0	0	0	0	0
YEL032C-A	0	0	0	0	0	0	0	0
YFL005W	2125	2120	1918	1980	1971	2193	1945	1430
YCR010C	25	26	29	25	19	22	28	19
YMR152W	1294	1159	1269	1261	1231	1179	1252	965
YDR154C	10982.3	12014.7	7962.85	7765.72	9141.97	8192.75	5689.76	4610.39
YMR125W	1208	1021	2532	2691	910	1607	2552	1897
YJR031C	541	309	830	903	362	514	729	600
YCL026C-A	58	46	56	13	96	79	113	86
YCL026C-B	449	581	441	415	398	414	376	302
YGR118W	7681.72	8405.39	6107.21	6384.67	6409.64	8651.63	6009.51	4120.23
YJL055W	3208	2781	2375	2214	2821	2716	2408	1490
YPR102C	7998.56	9917.88	8047.22	8037.44	7192.21	9872.25	7836.28	5367.99
YNL334C	280.031	245.113	208.258	238.062	174.192	172.869	271.165	138.134
YGL123W	24606	28645.9	24733	25334	21425	29946	24292	17634.9
YPL064C	699	596	553	522	595	619	578	471
YPL086C	832	842	1239	1113	601	969	1200	859
Q0250	3	0	2	3	0	1	2	1
YPR153W	103	88	131	139	86	111	98	96
YMR042W	156	195	210	182	159	199	163	142
YLL003W	582	506	807	810	438	688	863	647
YER042W	434	385	523	420	349	381	474	308
YDR109C	561	510	595	565	443	622	583	439
YDR221W	898	835	1010	1069	715	923	950	711
YLR109W	8091	9113	5541	7039	7199	4795	4263	3680
YKR009C	568	595	521	484	524	658	735	494
YMR078C	586	480	781	593	445	609	749	511
YLR094C	796	874	850	828	674	1008	858	662
YBR037C	790	644	476	554	701	556	375	333
YLR041W	20	27	14	39	20	26	14	17
YJR060W	1015	636	711	631	817	679	695	467
YNL161W	1518	1118	1408	1393	1283	1415	1562	1064
YIL146C	531	408	492	480	377	474	496	405
YLR195C	999	995	1279	1296	886	1161	1293	864
YJL202C	2	0	2	0	1	0	2	0
YAL066W	0	0	0	2	0	0	0	0
YCR081C-A	0	0	0	0	1	1	0	1
YLR231C	720	839	904	829	878	891	1060	643
YKL016C	5003	4166	3946	3767	5429	5701	5243	3600
YPL111W	5203	5634	4698	3719	4257	6621	4417	3270
YKL174C	1347	1133	1621	1678	969	1406	1968	1216
YKL121W	812	543	657	751	741	684	714	569
YLR380W	1557	1374	1545	1482	1111	1618	1522	1035
YOR142W-B	2782.13	1902.67	3649.4	4062.92	2202.7	2910.07	4067.12	2968.41
YMR012W	2860	2522	4553	4811	2016	3464	4847	3697
YER093C	499	445	799	861	389	535	841	627
YOR032W-A	18	3	8	6	7	8	9	6
YDL201W	601	619	908	781	350	679	860	605
YDR468C	886	659	647	622	707	695	691	501
snR73	1	0	2	1	0	2	1	1
snR72	1	1	5	3	3	1	1	1
snR71	0	0	2	1	1	1	1	2
snR70	21	24	25	21	26	33	28	27
snR77	0	2	11	12	1	2	13	11
snR76	24	26	31	36	20	31	30	27
snR75	6	1	3	6	2	1	1	3
snR74	2	0	2	0	0	0	5	1
YFR003C	1007	779	504	544	819	640	589	435
snR79	0	0	2	1	0	1	1	1
snR78	2	0	1	0	0	1	0	1
YIL033C	4893	3555	2711	2828	4553	3489	2991	2200
YOR368W	272	236	333	312	261	299	317	229
YGR128C	513	462	1538	1392	299	801	1458	1069
YIL048W	1114	854	1697	1738	837	1275	2047	1340
YIL142C-A	2	1	1	1	2.007	2.005	3	2.009
YLR337C	2227	1612.98	1487.99	1853.98	1823.93	1845	1639.95	1377
YOL056W	425	569	495	541	354	598	473	347
YFR052W	1837	1841	2186	2123	1660	1849	2123	1438
YGR088W	1296	872	591	478	1679	957	764	536
[truncated: 4,845 more rows]

## Sheet: ripev.4h
	A_rip4h	B_rip4h	C_rip4h	D_rip4h	A_ev4h	B_ev4h	C_ev4h	D_ev4h
YAL008W	504	464	469	578	417	618	537	516
YBR255W	742	437	544	676	483	658	634	575
YGR164W	4	2	1	3	4	7	1	3
YGR131W	31	38	36	49	19	55	41	46
YNL003C	819	598	507	823	593	1011	627	674
YBR135W	689	315	389	528	548	643	517	435
YBR160W	1069	655	715	841	802	1046	849	756
YJL082W	1163	797	830	1195	710	1346	853	936
YJL142C	213.577	179.175	166.079	173.059	141.064	394.327	167.085	149.228
YPL191C	168	199	191	254	133	252	229	226
YGL215W	2870	2233	2877	3486	1911	1924	3273	3014
YKL074C	1193	536	788	832	838	794	1054	813
YJL077C	25	9	6	8	17	26	23	18
YKL096W-A	78742	36385	47690	56055	58085	67363	60680	57602
YIL124W	2155	1205	1311	1669	1419	2618	1408	1402
YLR364C-A	0	0	0	0	0	0	0	0
YIL171W	0	0	0	0	1	0	0	0
YPL039W	506	312	317	428	349	389	374	343
YNL170W	24.053	17	28	37	9	24	50	47
YGL141W	640	619	615	679	424	729	592	617
YJL179W	398	272	236	444	253	321	365	287
YDR316W-A	0	0	0	0	0	0	0	0
YDR316W-B	1246.4	231.413	2162.05	163.532	403.932	801.927	221.988	182.224
YKL083W	6.009	8	11.09	5	25.063	1.003	21	13.079
YBR152W	330	188	202	272	260	274	235	242
YKL029C	3174	999.995	1726	2408	2160	1146	1886	1873
YPL166W	157	218	175	157	110	281	138	123
YKL052C	761	428.951	434	611.942	588.878	565	501	514
YHR025W	4711	2252	2772	3698	3771	3951	3485	3331
YOL034W	795	507	622	822	491	496	726	724
YBL008W	670	359	446	682	449	443	581	608
YIL062C	2310	1247	1199	1607	1529	2643	1453	1466
YCL023C	0	1	0	0	1	1	1	3
tC(GCA)P1	0	0	0	0	0	0	1	2
YOL116W	483	396	384	452	418	614	456	411
YDR196C	938	683	588	712	612	1099	695	662
YNL255C	5876	2666	3274	4127	4154	4061	3836	3497
YNR032W	821	469	495	519	650	962	619	575
YNR045W	837	472	535	675	640	876	642	611
YML105C	1705	896	1011	1195	1215	1319	1312	1145
YNL288W	1047	533	594	772	733	960	703	692
YIL059C	208	110	124.992	145	141.983	184.991	114	153
YIL004C	672	403	324	464	464	541	365	361
YNR018W	3765	1542	1916	2512	3182	3302	2849	2371
YPL144W	387	168	227	337	246	291	234	251
YFR047C	1364	986	954	1210	1033	1687	1070	1041
YER087C-B	1475	842	864	1118	1051	1349	1105	1057
YHR078W	736	597	734	966	559	739	777	829
YIR023C-A	1	0	2	3	4	2	2.063	2
YJR115W	104	72	61	92	71	142	104	95
YLR355C	23038	7156	11360	14971	14681	7746	12290	12516
YGR099W	688	414	426	548	491	469	529	546
YLR300W	15751	4710	7383	10196	9011	6483	8743	8298
YCL028W	2615	1516	1644	1992	1959	2482	1859	1791
YJR140C	710	546	713	889	403	460	804	755
YOR033C	776	472	556	624	509	564	615	562
YOR062C	149	84	94	118	99	145	102	102
YBR043C	1690	1025	1097	1666	1073	1238	1254	1304
YHR112C	636	457	420	529	449	738	506	476
YLR011W	226	166	143	233	174	291	171	181
YIL044C	1030	645	654	795	742	922	919	778
YNL197C	2413	1370	1630	2089	1548	1557	1711	1887
YKR103W	222	172	284	279	147	166	286	296
YLR133W	1859	1170	1235	1547	1252	1574	1472	1309
YER121W	51	54	43	58	31	86	37	34
YCR046C	997	562	516	805	711	909	589	593
YNL144C	1758	1082	1508	1365	1198	1736	1385	1401
YKL204W	1774	963	1124	1376	1218	1367	1275	1277
YOR266W	591	401	432	550	415	489	499	440
YDR393W	518	295	342	439	333	401	448	427
YGL171W	1737	640	1102	1437	1206	625	1359	1231
YPR194C	6623	4500	5002	6504	3386	4636	5374	5125
YGR019W	1494	966	1016	1302	986	2050	984	994
YBL033C	1588	729	813	1098	1248	1375	1057	1015
tE(UUC)G3	2	0.5	0	6	3	7	3	4
YJL188C	24.003	21.004	23.003	10.001	72.013	39.006	31.003	15.003
YLL057C	127	58	77	90	75	110	96	77
YPL060C-A	9.937	0	12.994	15.066	11.041	8.161	4.388	6.301
YBR296C	107	114	94	130	87	147	109	125
YNL277W	101.401	67.322	48	48	53	214.398	58	73
YMR040W	250	191	148	158	155	408	202	124
YDR077W	52453	20743	35413	30248	38464	43998	32621	32543
YMR266W	5413	3618	3848	4220	3594	4184	4605	3987
YKR064W	679	576	729	931	404	486	811	814
YPL089C	1395	649	900	1244.35	868	1106.36	1014	966
YGR277C	706	393	408	478	487	638	475	441
YDL139C	159	96	97	114	109	130	122	111
YDR246W	712	475	457	555	531	787	572	463
YOR288C	882	817	722	857	586	1257	1092	781
YDL240C-A	0	0	0	0	0	0	0	0
YCR028C	1001	545	586	987	680	731	826	809
YML054C	560	471	326	416	391	1056	377	391
YLR179C	3726	1750	2167	2683	2788	2940	2519	2318
YOR141C	1385	904	1203	1204	993	1103	1270	1239
YPL280W	23.412	31.558	24.465	28.267	0	64.56	10.442	45.327
YBL106C	730	403	502	741	450	427	647	610
YGL044C	750	368	417	548	542	624	520	478
YER107C	1159	522	660	939.989	871	902	818	808
YBR038W	2008	1179	1515	1952	1280	1523	1630	1773
YER076W-A	4	1	6	2	1	7	6	8
YGR259C	17.056	8	13.144	8.028	7.041	19	7.013	12.13
YEL047C	1448	766	1044	1226	1098	1388	1067	1050
YPR016C	4207	1733	2345	2961	2960	2355	2847	2514
YOR208W	570	598	593	769	362	684	669	644
YDL055C	42723	20457	28554	32297	31459	29796	35016	27010
YML009C	644	404	447	584	411	464	446	474
YML072C	5222	3328	3865	4633	3006	4576	4208	4055
YDR142C	630	332	435	541	443	591	539	476
YFL044C	884	610	559	754	604	905	609	638
RDN37-2	7.986	0	0	0	0	20.126	0	7.446
YEL011W	3132	4637	2448	2421	1886	10841	1856	2291
YKL019W	1573	843	1048	1235	1268	1544	1102	1146
YJL130C	15819	7380	11683	15364	8850	8715	12148	13334
YBL085W	2845	1663	1867	2056	1874	2521	2104	1991
YBR116C	15.383	23.034	3.415	18.424	7.67	41.288	8.41	19.067
YDR166C	954	811	1012	1141	510	675	1096	1072
YHR212W-A	0	2	1	1	1	1	1	1
YDR082W	578	364	443	515	364	431	480	524
YDR348C	2124	1164	1234	1560	1602	1810	1457	1416
YKL182W	22516	12904	18625	23453	13333	16306	21269	18408
YDR445C	1.014	0	1	0	1	0	0	1.015
YKL018C-A	332	247	199	271	279	326	267	274
YPL027W	2	1	3	9	1	7	8	5
YKL135C	1670.96	1134	1373.76	1695	926.963	1331.98	1659	1434
YLR363C	221	275	198	336	141	221	311	293
YEL077W-A	14.166	3.252	0	5.672	6.153	2.13	2.553	0
YDR179C	84	145	179	198	34	42	175	149
YML089C	24	4	14	18	19	17	20	23
YLR431C	265	182	208	232	192	272	273	239
YKR046C	928	590	615	806	717	1357	577	684
YJR005W	1619	1026	1313	1642	981	1272	1650	1374
YJL116C	718	493	875	1043	634	671	822	719
YMR030W	485	377	419	458	315	621	442	388
YER030W	1583	1132	848	1147	985	1452	908	933
YIR026C	1510	661	925	1148	1166	950	1088	962
YJR072C	2555	1239	1644	1916	2044	1918	1958	1610
YDR515W	586	377	486	597	364	332	561	448
YKR039W	16230	10083	8654	10470	8391	14634	9247	8152
YGL003C	1176	651	765	886	891	892	867	805
YPL009C	1828.6	1494	1933.21	1885	1453	1310	2135	1672
YDR268W	414	292	348	432	275	390	343	428
YGL192W	6	8	4	7	6	1	5	11
YDL117W	1232	564	833	1048	723	643	874	866
YMR131C	5143	1753	2830	3675	4044	1990	3635	3348
YMR293C	404	286	345	412	266	311	308	343
YJL214W	28	11	13	18	17	19	15	21
YIL105C	1099.29	990.376	889.62	969	738	1183.24	1074.29	888.877
YML126C	4415	2346	3048	3944	3238	3588	3942	3697
YLR189C	1134	1031	941	1063	817	1251	1026	1016
YIL150C	306	128	226	203	217	110	220	225
YLR349W	27.045	28	29	27	19.042	50.17	34	20.051
YGL250W	298	265	197	278	201	432	229	227
YBR212W	2189	1832	1581	1978	1675	2779	1632	1736
YJR109C	6896	3392	3025	4742	3996	5405	4402	5085
YLR254C	331	248	250	274	224	369	254	228
YGR085C	12967.4	4519.69	6277.87	8566.61	9732.12	7479.88	8151.44	7602.92
YPL105C	3830	1878	2401	3294	2586	2447	2615	2707
YGR145W	2493	994	1647	2015	1795	964	2220	1822
YJR094C	108	89	171	133	83	95	206	146
YKL177W	5	7	15	17	6	9	9	7
YGL154C	220	165	161	237	183	250	208	210
tK(UUU)Q	0	0	0	0	0	0	0	0
YBR129C	898	821	710	893	594	899	851	794
tK(UUU)D	8	2	3	8	4	15	12	6
YMR322C	0	2.841	0	0	0	2.037	0	2.157
YKL099C	1404	469	620	902	890	508	870	817
YDR315C	137	177	151	225	64	139	205	195
YLR394W	671	423	415	586	427	594	566	566
YNL104C	8561.95	3108.64	3940.24	4812.62	5501	5944	4821	5215
YNL151C	1227	648	807	1188	982	684	966	880
YNR066C	124	88	135	130	84	103	121	132
YLR220W	1624	996	1091	1255	1180	1434	1278	1083
YHR006W	1560	929	916	1375	1069	1506	1061	987
YMR232W	33	59	59	59	29	72	95	82
YNL083W	846	466	490	680	593	796	596	597
YGR038C-A	0	0	0	0	0	0	0	0
YGR038C-B	1454.24	1412.77	2553.96	1590.28	1764.13	1018.02	2475.19	2837.34
YMR238W	2237	1496	1567	2299	1499	2198	1685	1680
YER168C	1020	593	654	862	723	769	986	749
YPL265W	2022	2164	1269	1677	1043	2952	1339	1037
YOR227W	1508	1681	1256	1702	905	2142	1513	1624
YOR081C	1606	928	1108	1233	1127	1373	1374	1182
YEL026W	5810	2017	2896	4567	3603	3095	3922	3356
YGR050C	105	51	54	55	61	73	59	50
YDR021W	445	150	333	425	295	127	468	411
YGL063W	539	204	258	348	364	311	303	348
YPL212C	2744	976	1528	2053	1827	997	1908	1838
YOL157C	155.383	97.362	133.564	166.853	78.978	144.676	116.089	117.441
YOR345C	2.027	0	0	0	0	4.099	6	5
YPR095C	1198	901	987	1269	752	1064	1089	1033
YOR310C	8575.79	3601.79	5540.23	7235.43	5920.76	4036.28	6558.84	6028.81
YDR188W	6534	2773	3939	4939	4955	5032	4357	4075
YOL128C	225	111	167	216	171	192	182	199
YGL236C	1040	438.994	554.996	873.988	697	659	645	713.991
YHR133C	1317	729	785	1080	895	1078	938	973
YDR017C	1815	1132	1554	1761	1263	1340	1729	1608
YIL090W	1398	781	1081	1382	831	790	1203	1174
YBR183W	282	223	205	211	158	443	143	192
YOL048C	486	594	432	538	351	935	503	472
YML039W	17.685	20.555	18.435	0	0	0	21.261	24.77
YCR007C	276	229	268	261	144	351	227	238
YDR540C	86	84	72	61	60	117	80	64
YEL004W	201	264	302	353	151	245	298	338
YPR057W	837	487	539	690	597	757	599	640
YLL032C	487	340	441	528	282	278	548	473
YDR116C	1174	655	657	928	722	993	699	681
YPL119C-A	13	61	54	58	13	20	46	60
YDR299W	1542	459	876	1278	972	333	1208	1130
YLR030W	28	31	25	43	32	41	22	32
YDR122W	1842	1688	1343	1728	1223	2705	1438	1483
YOL062C	2237	1131	1344	1751	1571	2096	1589	1593
YNL234W	201	151	116	195	133	186	158	148
YLR467W	2353.22	1693.22	1860.78	2655.96	2069.28	2332.67	2360.34	2746.59
YJL194W	307	174	188.994	282	180	180	209	268
YOL015W	176	196	171	233	95	236	213	206
YDL070W	4953	4332	4942	6080	2955	4059	5585	4590
YOR241W	1332	706	777	1055	919	986	1118	955
YLR056W	7263	4108	5109	8737	4774	5040	5828	6379
YPR039W	2.465	1.483	0	2.666	1	0	0	0
YMR054W	2385	1638	1710	2148	1501	2457	2036	1852
YKL110C	1160	438	711	821	834	630	911	777
YML100W-A	3	2	2	4	0	5	3	4
YPR070W	650	489	662	768	439	544	771	725
YLR204W	989	576	590	736	682	881	640	558
YML097C	970	492	573	721	647	530	790	711
YKR007W	767	428	478	678	544	699	542	485
YDL096C	1.004	5.109	1.006	6.047	4.067	2.059	4	2.029
YHR193C	12183	6154	7083	9458	9263	10127	8080	7128
YBL099W	18023	7801.98	10802	12420	16149	17531	17026	15312
YJR035W	519	430	403	488	345	530	463	466
YOR126C	415	208	249	266	273	324	280	274
YMR023C	350	297	267	362	244	402	321	287
YOR119C	1951	1098	1633	1994	1307	1065	1780	1802
YNL196C	10	3	3	5	2	7	2	2
YNL187W	311	160	232	251	241	222	218	248
YMR141C	1	0	4	0	2	2	6	1
YLL014W	834	497	462	674	445	745	548	523
YBL062W	0	0	1	1	0	0	1	2
YCR061W	286	213	181	241	174	386	176	232
YOR199W	0	0	3	4	1	1	1	0
YPR115W	2106	1695	1675	1666	1469	2655	1893	1683
YHR088W	1620	788	1106	1396	1216	696	1412	1283
YBR017C	1790	905	1312	1497	1254	1027	1533	1558
YPR162C	475	341	431	467	389	370	545	433
YGR166W	671	421	610	745	421	488	707	693
YDL161W	1962	1078	1246	1507	1515	1737	1487	1468
YKL050C	357	175	235	261	217	239	267	294
YJR055W	137	61	125	143	82	68	135	139
YGL099W	2481	1098	1600	2042	1783	1126	1837	1654
YFL030W	1025	575	628	598	1276	1669	1218	1186
YIL119C	648	523	698	441	449	349	880	673
YPL193W	1015	593	677	886	695	579	797	733
YNL005C	2034	1195	1321	1668	1417	1684	1571	1408
YGL217C	0	0	0	0	0	0	0	0
YJL144W	197	256	249	152	131	386	142	125
YBR012W-B	568.253	280.127	473.725	648.578	384.95	372.251	435.939	508.239
YLR379W	2.002	2.01	1.004	1.003	2.003	4.022	7.025	4.021
YJR139C	5357	3178	3803	4969	3351	4676	4831	4037
YBR133C	1314	873	888	1130	942	1139	1200	1110
YBR162C	26537	14493	16210	22230	17084	22715	20188	17055
YNL331C	252.879	162.04	180.146	237.771	187.324	237.549	217.938	247.301
YJL079C	9889	4988	6738	7390	6741	7813	6464	6427
YGL019W	1753	911	974	1335	1243	1442	1174	1124
YGR201C	359	240	230	294	274	366	223	241
YNL172W	750	520	650	843	479.95	574	739	745
YNL058C	672	304	341.706	492	391.619	393	394	442.897
YPL160W	6422	3168	4819	6016	4220	3458	5481	5281
YOL083C-A	0	0	0	0	0	0	0	0
YNL023C	1542	556	879	1219	1183	679	1072	1115
YDR214W	2263	1588	1776	1996	1574	1826	1460	1524
YLR222C	2772	831	1818	2313	1662	696	2188	2024
YLR295C	3108	1396	1627	1857	2513	2630	2497	2302
YER175W-A	0	8	5	1	1	1	4	4
YHR168W	541	293	309	444	375	410	398	400
YOR064C	593	301	326	459	476	396	447	443
YOR159C	642	365	359	502	432	469	394	361
YOL081W	1187	1373	1587	1798	737	1098	1757	1647
YOL036W	2335	1296	1674	1985.99	1629	1863.96	1819	1709.98
YGL148W	6665	3022	3786	4797	5138	4931	4581	4253
YOR031W	297	119	163	196	191	451	231	210
YBR282W	675	421	434	591	400	635	452	455
YDR194C	4005	2166	2782	3540	2330	2200	3134	2881
YOL114C	77	83	56	66	85	115	55	67
YGR084C	1212	652	759	983	826	833	801	778
YNR030W	1188	724	871	1094	751	1026	1218	1074
YAL037C-A	1	3	0	1	0	3	1	1
YML007C-A	8	5	7	6	6	3	6	7
YBR018C	93697	48180	58726	83606	53417	81233	66926	61708
YKL076C	171.738	87.005	108.393	118.486	131.49	139.99	117.655	89.242
YDR466W	1049	755	876	938.466	744	923	936	936
YFR045W	457	300	259	349	270	528	337	323
YIL002C	833	663	802	899	611	753	884	801
YGR159C	18138	5226.98	9136.97	12683	12890	6678.99	10857	10475
YLR369W	904	604	604	755	639	917	796	687
YFR032C	46	14	37	61	34	11	28	72
YNL118C	2480	1903	2007	2474	1602	2050	2319	2069
YGL228W	2951	1789	1996	2565	1917	2758	2358	2119
YJR117W	2717	1995	2226	2968	1714	2260	2610	2367
YBR196C-A	8	8	15	22	3	5	16	12
YBR196C-B	28	3	12	9	11	13	15	11
YIL030W-A	88.11	36.234	51.276	48.001	46.473	80.951	55.538	52.595
YLR357W	2033	1079	1320	1743	1328	1330	1572	1499.99
YER127W	1060	253	429	671	772	237	643	609
YBL015W	2065	1210	1361	1403	2275	3140	2027	2131
YLR017W	1789	842	1003	1366	1517	1119	1279	1182
YHR110W	1293	741	768	973	873	1198	841	832
YBR041W	1543	1135	1144	1490	979	1281	1366	1309
YOR394W	13.081	14.829	12.975	18.626	10.453	13.74	17.593	16.082
YCL068C	2.162	0	0	0	0	0	0	2.125
YDL220C	393	240	313	403	329	313	431	346
YDL039C	528	184	452	933	857	337	710	955
YKL202W	20	13	19	16	11	25	18	19
YGR122C-A	2.847	11.37	21.909	15.706	1.258	14.605	21.454	7.302
YOR264W	1322	499	773.977	997.987	873.993	672	1020	834
YNL042W-B	0	1	2	0	3	4.056	2	0
YBL029C-A	527	334	285	287	313	670	409	341
YOR008W-B	30	12	16	10	19	29	17	21
YOR366W	11	21	19	22	18	30	32	31
YNL275W	482	342	404	572	357	365	497	501
YAR015W	5603	3014	2646	2966	4197	6017	3735	3003
YOR384W	94	98	88	221	58	137	87	156
YLL051C	1385	875	1068	1691	823	986	1112	1346
YDR427W	1465	1713	2113	2466	966	1308	2473	1960
YLR079W	2515	1021	1327	1594	1712	1733	1541	1357
YLR408C	89	98	73	91	55	114	76	78
YMR093W	1712	386	839	1288	1118	388	1154	1118
YBR221W-A	0	0	0	0	0	0	1	2
YDR079W	312	293	263	354	231	351	309	261
YMR268C	412	188	312	367	258	175	347	325
YOR169C	0	0	0	0	4.024	2.004	1.002	0
YML070W	2401	1896	1846	2118	1933	3326	2097	1983
YHR175W-A	50	104	115	165	27	68	149	154
YPR072W	1978	1496	1561	1905	1349	1721	1977	1599
YMR108W	9246	3483	5437	6742	6406	4721	5685	5945
YCR091W	475	479	334	424	301	976	343	400
YER062C	754	625	642	905	801	1381	1015	828
YDR244W	988	603	541	795	702	870	683	700
YER189W	96.03	39.303	50.163	122.03	83.651	89.88	80.74	132.685
YJL009W	1	0	0	0	1.003	1.003	1.005	1.003
YDL137W	6935.84	4026.5	4127.32	5650.57	4710.86	6907.86	4834.42	4453.44
YGR271W	987	798	957	1141	624	776	1136	1175
YDR233C	9212	5043	5633	7629	5721	7041	6841	6550
YGR071C	512	596	632	829	354	394	830	678
YCR106W	297	245	353	454	235	265	409	370
YBL100C	2.001	2.023	2.005	3.004	1.003	2.003	5.01	3.013
YER109C	1237	629	769	1024	790	873	987	857
YDR489W	289	145	184	314	219	246	265	289
YPR049C	494	376	505	657	356	387	639	549
YDL057W	252	161	174	220	172	259	185	185
YPR014C	2	1	0	0	0	0	0	0
YGR257C	1230	592	680	927	853	1078	814	860
YEL045C	20	7	12	10	10	3	14	19
YPL235W	2620	1492	1656	2225	1788	1964	2137	1908
YLR122C	31.838	29.601	15.874	34.211	27.248	28.712	26.977	28.859
YLR155C	8652	4849	4720	6284	6042	9096	5906	5603
YBL087C	8197.91	3146.84	3843.25	5404.52	5602.99	5383	4908.92	4461.65
YJL132W	211	233	175	207	174	330	219	215
YGL190C	991	1080	1033	1316	642	1015	1175	1096
YBR110W	1139	953	955	1334	741	961	1116	1094
YDR144C	1140	522	624	1106	690	680	904	929
YFL046W	725	458	494	524	482	697	553	496
YOR103C	397.936	584.999	554.963	680.977	261	403	677.985	544.977
YKL137W	668	486	366	553	367	644	411	363
YDR447C	10498.7	3860	4300.74	6400.34	6280.26	6665.89	5775.59	5222.78
YGL009C	5778	2968	4344	5102	3666	4008	4604	4429
YNL324W	1	0	0	0	1	0	1	0
YPR145W	17418.3	6025.33	7930.27	10282.3	11488.2	9759.51	9648.41	9745.93
YJL063C	1653	947	903	1261	1154	1485	984	1061
YMR149W	3041	1577	1791	2367	2173	2883	2285	2136
YPL021W	1	0	0	3	0	3	1	1
YIR010W	1091	595	611	811	796	792	698	631
YDR331W	972	543	576	785	621	693	795	689
YJL114W	0	4.633	6.71	12.269	1.161	0	4.991	6.005
YKR044W	790	250	380	483	532	398	484	517
YLR433C	897	634	744	767	650	816	1018	797
YMR068W	153	129	114	123	132	203	131	122
YLR157C-B	104.178	12.9	0	40.371	0	0	0	43.876
YNL164C	462	178	262	420	303	207	366	346
YER032W	1063	533	693	876	683	600	743	734
YJR070C	5317	1849	2748	3695	4206	2919	3612	3086
YGL005C	969	749	621	882	484	785	738	643
YHR043C	2456.14	1813.51	1677.79	2271.45	1638.69	3021.72	1993.88	1756.85
YDL111C	1211	545	695	927	815	727	997	830
YMR133W	6	2	1	3	1	6	6	3
YPL007C	519	411	483	591	296	402	575	509
YKL159C	454	286	335	330	262	369	369	292
YDR507C	3030	1570	2271	2700	1974	1728	2688	2334
YKR075W-A	0	1	2	1	2	1	4	3
YLR138W	2821	1627	1741	2411	1737	2332	2038	2045
YBR101C	1876	1441	1772	1762	1014	977	1390	1204
YLR396C	567	389	415	609	319	511	598	457
YBR245C	1949	1118	1486	1715	1281	1293	1655	1585
YJL216C	159	79	121	151	117	144	129	124
YBR210W	397	371	316	403	261	396	404	401
YPL103C	760	385	464	537	516	637	575	579
YIL103W	1005	383	611	849	663	385	742	691
YIL152W	390	256	271	333	337	485	285	302
YML045W-A	0	0	0	0	0	0	0	0
YJR096W	516	536	392	453	455	1000	438	398
YAL010C	426	303	360	382	285	387	465	391
YGR143W	2183	1382	1555	1688	1328	2201	1418	1454
YGR112W	597	398	406	492	423	856	429	431
YLR256W	4093	4275	5218	5600	2649.19	3440	5955	5003
YHR174W	73728.9	33249.7	46018.5	67912.6	51151.8	66604.2	47812.5	42958.4
YOR012W	47.121	30.188	28.706	45.746	25.482	43.47	32.968	38.69
YIR001C	791	536	617	728	604	732	760	747
YDL213C	1951	1032	1218	1520	1544	1240	1417	1253
YDR442W	1	0	0	1.016	0	0	0	0
YDR317W	26	30	46	57	23	53	63	63
YDR478W	229	106	147	161	185	130	181	141
YKL097C	1	1	0	0	2	4	0	0
YOL164W-A	0	0	0	2	0	0	0	1
YNL106C	700	510	464	601	474	669	570	556
YOR378W	16.059	6	9	16	16	22	5	13
YFR015C	2578	4824	1858	2669	1602	10242	1400	1922
YMR230W	8064.73	3682.32	4075.32	5498.71	5258.88	5590.45	5192.71	4438.43
YIL092W	437	189	264	344	273	250	362	291
YAR009C	10537.5	12119	12759.1	11058.5	6947.09	9473.12	16550.7	12066.4
YLR321C	1041.99	581	667	895	781	852	792	775
YBR004C	542	687	843	1023	274	489	1047	892
YGR052W	187	219	213	146	210	386	217	179
YJR161C	360.215	249.324	329.177	356.692	274.505	627.835	381.169	350.676
YOR278W	515	303	316	428	351	411	420	365
YNL085W	2146	1908	2412	3025	1293	1521	3043	2658
YGL061C	322	245	292	355	198	247	372	282
YPL210C	2526	1509	1923	2577	1585	1447	2524	2038
tS(AGA)G	1	0	3	0	2	3	0	0
YOR087W	1200	891	896	1183	810	1207	1081	989
YGL234W	10117	4656	4917	6437	7444	8750	6956	6163
YOR347C	661	639	475	547	499	1308	533	531
YPR093C	272	154	167	206	211	265	191	207
YAL029C	2071	1302	1940	2305	1324	1339	2150	2012
YOL155C	427.898	317.236	273.228	491.097	279.107	309.669	249.315	629.107
YDR421W	545	438	454	581	380	561	545	556
YGR186W	2752	1730	1943	2391	2029	2426	2241	1995
YDR294C	2244	1211	1386	1758	1438	1859	1674	1586
YHR135C	3572	1914	2201	2715	2445	2838	2521	2544
YDR015C	0	1	0	0	0	0	0	0
YBR181C	19307.5	7090.83	9526.83	12753.9	14395.3	12038.7	11859	11121.2
YOR078W	1206	435	755	995	813	362	909	865
YOR243C	3185	1529	2120	2779	2105	1541	2591	2418
YMR165C	1069	645	742	816	814	965	821	748
YCR005C	2006	1352	1638	1932	1239	2967	1697	1741
YLR163W-A	0	0	0	0	0	0	0	0
YPR055W	553	596	659	882	325	475	865	760
YIL016W	1039	453	579	732	695	856	627	572
YLR032W	697	437	528	647	459	492	581	580
YDR114C	2	2	1	2	1	2	2	2
YLL030C	0	0	0	0	0	0	0	0
YDL185C-A	0	2	0	0	1	1	0	2
YLL065W	0	0	0	0	0	0	0	0
YPR046W	211	125	100	175	138	194	139	125
YBR099C	18	49.681	69	60	12	12	46	34
YBL027W	21390.4	9781.77	12398.4	16427.5	16669.7	16410.3	14911.9	13557.4
YOL060C	1845	1291	1252	1480	1351	2227	1410	1363
YIR018C-A	1	3	0	0	1	4	2	2
YOR382W	632	425	356	1150	334	619	308	590
YNL232W	1304	541	682	904	911	695	901	843
YDL076C	558	537	471	604	381	765	490	450
YOR225W	1	0	0	0	0	0	0	0
YDR120C	2788	1029	1555	2035	2084	1252	2037	1822
YLR465C	34	20	33	31	35.083	54	52.694	38
YJL192C	1518	1140	1117	1459	958	1318	1413	1288
YEL020C-B	1.002	0	0	0	0	0	1	1
YLR054C	106	99	70	99	64	160	83	58
YLR009W	3380	1161	1869	2411	2419	1208	2363	1936
YKL116C	972	518	675	764	680	763	847	722
YBR209W	0	0	0	0	0	4	0	0
YOR292C	304	289	214	258	202	556	235	262
YLR423C	280	289	257	292	185	344	350	275
YDR278C	0	0	0	0	0	0	0	0
YLR105C	741	498	577	696	567	768	627	585
YML091C	1955	1621	2184	2851	1566	1268	3375	3131
YHR191C	238	134	122	194	172	185	174	142
YDL098C	247	174	166	249	171	222	211	179
YLR202C	58	45	47.71	68.177	39.658	67.334	56.116	40.862
YLR299C-A	0	0	0	0	0	0	0	0
YKR005C	148	106	124	162	111	135	132	125
YMR143W	12535.1	5193.56	5917.15	8271.99	7999.25	8855.78	7367.4	6531.99
YCR063W	120	67	81	96.875	74	67	82	91
YNL189W	4402	2617	3035	3917	3031	3301	3715	3365
YFR024C-A	2171	1356	1444	1954	1539	2360	1665	1616
YCL047C	319	216	210	289	252	389	287	300
YGL122C	3109	1464	1893	2229	2300	2381	2167	1975
YDL018C	359	359	250	338	247	456	291	279
YOR120W	17266	11532.5	11980.8	14907.9	11751.9	21907	13291.7	12523.9
YPR160W	1937.91	3754	1401.8	1507	1078	8227	1096	1200.95
YBL060W	572	336	448	502	411	377	575	522
YDR065W	202	139	230	243	156	122	261	230
YBR019C	166595	92694	115382	155446	92332	130388	116419	110148
YKL056C	25202	10597	10658	15792	14576	18458	13306	12643
YKL065W-A	21	17	10	20	9	21	17	15
YGR160W	6.004	17.017	19.029	3.002	36.047	10.005	19.028	10.014
YDL163W	0	0	1	0	1	0	1	1
YPL068C	394	214	238	433	276	254	337	344
YJR057W	667	377	388	524	477	525	476	486
YGL211W	1261	556	692	882	973	801	933	829
YFL032W	17	10	14	11	3	16	20	17
YPL195W	1401	1124	1449	1694	917	1070	1645	1457
YCL044C	1168	542	605	724	923	1026	969	710
YAL059W	1146	407	508	688	771.986	431.975	691.993	586
YNL007C	4662	4210	5283	5040	2611	4198	3668	3224
YPL148C	152	118	115	146	108	186	148	183
YJR137C	1107	688	873	983	783	915	979	1118
YMR021C	620	359	415	520	454	570	478	440
YMR074C	962	559	575	781	575	960	691	715
YGR203W	297	157	200	224	238	270	170	196
YJR039W	373	480	354	408	221	510	413	407
YDL158C	27	93	85	131	23	28	127	81
YOR104W	482.65	284.417	262.421	373.967	334.017	412.289	306.568	332.78
YFL009W	1377.99	996.675	1046.5	1266.35	1031.5	1341.01	1191.85	1098.19
YLR297W	74	42	97	46	65	65	93	58
YLR279W	3.017	1	1	0	3	2	3	0
YDR216W	3306	3454	3845	4328	1891	3807	4238	3960
YIL120W	266	199	225	303	185	271	294	252
YBR030W	1393	504	785	1007	911	569	973	935
YPL162C	556	243	324	455	382	405	387	401
YGR095C	979	329	524	699	650	498	714	651
YCL027W	331	266	286	156	319	618	542	251
snR3	1	0	0	0	0	1	1	2
snR5	18	5	18	16	5	20	23	15
snR4	45	34	26	62	20	34	31	27
snR6	1	1	0	0	1	2	1	1
snR9	22	13	7	18	10	35	16	9
snR8	18	5	8	13	13	14	7	5
YHR029C	798	500	518	654	475	798	565	558
YIR021W-A	2	0	3	2	1	4	1	1
YAL033W	591	378	286	412	342	479	361	288
YNL130C	2286	1589	1644	2464	1380	1894	2211	1960
YNR036C	1784	1021	957	1403	1344	2019	1087	1088
YNR049C	583	325	399	511	489	587	414	395
YDR192C	544	223	299	447	421	410	355	383
YOL112W	1258	822	847	1039	883	1312	975	955
YML109W	833	428	552	689	587	435	634	674
YOL083W	336	331	268	355	217	480	287	317
YNL251C	1740	1153	1125	1531	1581	1831	1644	1511
YBR266C	0	0	1.002	0	2.003	2.013	1.004	1.003
YBL004W	2241	1494	2324	2788	1476	1012	2508	2395
YER145C-A	6	1	4	2	2	4.003	5	3.001
YBR164C	1214	872	813	1044	809	1137	1143	945
YHR074W	2374	1555	1785	2304	1694	2331	2256	2114
YDR464W	1491	826	1156	1455	996	801	1249	1256
YFR030W	1409	822	953	1150	939	1283	1230	1144
YJL146W	675	445	441	586	433	569	551	449
YKL078W	1016	200	531	716	679	183	719	677
YIL055C	324	316	249	334	200	517	344	273
YPL053C	2450	1283	1618	2155	1511	1707	1901	1727
YLR351C	1923	1257	1327	1698	1437	2035	1636	1404
YEL009C-A	2	2	6	7	2	3	4	6
YJR111C	696	272	320	446	455	359	387	440
YIL030C	2497	1709	2301	2960	1583	1522	2603	2588
YER125W	3192	2216	2547	3268	1997	2899	2893	2757
YER152C	1769	932	1058	1370	1333	1650	1312	1134
YLR015W	634	302	354	493	496	378	483	448
YHR116W	289	243	198	258	201	277	144	179
YPL259C	1278	838	1064	1307	820	1251	1259	1088
YOL100W	1018	909.981	931.803	1085.91	688	1074	1057	986
YOR039W	1393	887	927	1178	876	1099	1194	1002
YDL037C	174	64	180	304	249	70	234	297
YLR334C	0	4	1	0	0	0	1	2
YHL043W	0	1	3	3	1	1	1	0
YOR364W	7	5	5	9	3	8	6	8
YOR386W	378	381	348	330	254	637	272	320
YAR042W	1667	890	1212	1391	1242	1260	1365	1331
YPR198W	1038	1067	1020	1322.99	695.992	1056	1231	1194.99
YHL038C	514	320	366	491	379	434	476	428
YLL053C	95	34	53.657	66	92	55	74	116
YDR425W	396	569	451	571	296	554	514	604.988
YOR331C	10.021	9.043	9.023	4.007	9.028	8.017	19.036	5.007
YML076C	867	542	709	775	567	651	752	719
YKR060W	680	212	399	514	509	240	500	457
YHR094C	5.157	5.03	2.011	5.166	5.097	4.102	1.012	10.297
YER069W	1465.98	659.954	700	1022	954	1069	1042	1087
YMR091C	1651	993	1083	1343	1238	1476	1320	1258
YER012W	2631	2029	1978	2190	1832	2593	2184	1728
YHR098C	2767	1972	2422	2932	1933	2396	3033	2611
YDL135C	1202	916	1043	1105	927	1351	1152	1057
YCR093W	2081	1616	2323	2592	1298	1407	2697	2629
tP(UGG)O3	0	0	0	0	0	0	0	0
YGR273C	0	0	2	5	0	2	3	0
YGL080W	755	581	463	670	384	659	624	592
YBR069C	6684	2350	3362	5512	4222	2790	4583	4614
YGR077C	768	603	638	817	511	716	807	779
YCR104W	5.919	2.171	4.025	8.374	6.547	13.26	8.446	7.918
YDR040C	3877.95	3157.96	2041.48	2974.75	2208.68	5044.37	2513.04	2614.2
YPR012W	11	7	8	14	10	10	13	7
YGR255C	1320	995	946	1130	870	1836	1152	1119
tM(CAU)M	1	0	0	1	0	2	0	2
YDL051W	3599.99	1660.99	2040	2797	2658.97	2093	2708.98	2296.99
YBL102W	1033	660	632	751	702	1029	770	691
tM(CAU)P	7	3	1	1	0	1	1	1
YPL237W	6113.99	2921.95	3699.99	4834.98	4260	4401.95	4390	4034.98
YLR120C	4357	3222	2546	3145	2888	6804	3112	2791
YCL001W-B	3	3	7	3	7	8	5	9
YCL001W-A	4	4	5	10	2	0	3	3
YNL068C	888	356	573	725	616	424	675	699
YJL169W	0	0	0	1	0	1	2	1
YBL002W	8755.36	4682.39	5681	7589.38	5232.38	5946.37	6972	5977
YDR146C	1595	942	1119	1301	981	1085	1194	1034
YBR112C	3485.93	1819.94	2275.08	2799.88	2388.57	2727.82	2461.54	2675.74
YBL081W	1139.58	331.834	530	762.392	791.442	384.251	714	779.692
YFL040W	5	10	5	7	1	6	12	11
YNL326C	529	310	387	420	386	431	476	429
YDR337W	1155	706	639	840	729	888	777	735
YJL061W	1052	735	922	1161	638	675	1113	1089
YPR147C	870	579	626	819	564	936	713	634
YKL131W	4	4	1	2	1	3	2	3
YDR441C	831	280	426	575	554	447	475	511
YPL094C	3451	1836	2013	2554	2697	3186	2733	2189
YOR101W	3657	1477	1959	2702	2391	1728	2359	2273
YER020W	1891	1453	1214	1305	1423	3204	1314	1199
YDR231C	571	357	346	383	520.992	874	444	412
YJL112W	1467	862	931	1236	986	1161	1150	1125
YFL066C	402.171	388.088	333.666	355.152	276.457	675.228	366.778	541.504
YNL193W	583	579	497	710	438	738	651	599
YML058W	3455	1225	1316	2160	2435	2613	2099	2059
YBR188C	353	208	201	320	229	313	231	280
YLR435W	1011	363	566	711	649	404	727	602
YJR076C	2621	1486	1691	2194	1873	2036	2041	1875
YKL157W	4346	3072	3543	4030	2855	4320	3943	3760
YBR003W	1364	857	755	979	955	1585	992	946
YPR129W	2176	1318.96	1489	2016.98	1686.98	2013.99	1795.95	1711
YDL113C	1019	952	786	928	627	1263	864	817
YMR135C	1329	1240	929	1132	946.998	2080	1139	1107
YGL007W	1	0	2	0	3	1	5	5
YPL005W	350	281	269	327	229	358	301	293
YBR247C	2010	603	1108	1432	1417	563	1382	1228
YLR185W	8141.09	2716.26	3624.76	4978.19	5691.6	5595.89	4969.64	4338.95
YJL210W	798.983	547	456	553	626	1139	528	542.991
YLR398C	1639	1105	1451	1674	1078	1272	1641	1520
YIL154C	1021	688	715	781	807	1220	739	690
YIL101C	948	1085	783	732	784	2326	757	723
tT(CGU)K	1	0	0	0	0	1	0	0
YKL004W	2489	1170	1549	2450	1414	1175	1745	1795
YPL154C	8169	6593	5653	6953	5732	11528	6077	5568
YPL101W	1633	781	970	1276	1266	986	1228	1169
YLR258W	3286	3993	2326	2532	1930	8157	1907	2281
YBR178W	2	1	3	3	1	1	0	2
YJR098C	286	173	156	288	182	236	241	234
YHR176W	241	196	198	231	241	328	228	213
YJR018W	10.017	11.046	6.027	2	12.029	5.045	7.063	6
YMR326C	0	0	0	0	1	4	0	0
YDL244W	41.789	51.11	36.477	60.25	38.863	38.214	33.736	32.833
YDR319C	384	520	476	624	251	505	670	566
YKL095W	633	321	377	371	463	705	471	417
YOL099C	4	2.019	9.197	9.085	3	4	8	1
YIL094C	3600	1737	2167	3319	2575	2625	2552	2548
YLR451W	1271	657	976	1215	848	740	1222	1046
YFR017C	718	650	525	532	536	1646	470	572
YLR342W-A	8	16	28	26	5	3	22	21
YIL076W	2246	1499	1748	2053	1479	2201	2078	1751
YNR077C	1.763	2.8	1	1.714	1.949	0	1	2.584
YOL044W	374	270	359	388	261	337	376	367
YLR323C	312	158	175	230	273	221	231	213
YOR085W	2418	1423	1492	2084	1665	2101	1792	1680
YGR054W	4260	1780	2508	3326	2791	2233	2904	3031
YOR050C	2	3	0	2	4	2	2	2
YNL087W	3689	2363	2723	3454	2454	2564	3288	2944
YGR114C	0	0	1.196	0	0	0	0	0
YLR318W	189	225	292	345	125	115	312	347
YBR278W	419	204	229	304	286	431	291.991	289
YNL024C-A	455	306	334	512	312	475	443	420
YDR296W	1395	829	809	1104	1062	1305	930	889
YGL232W	966	749	870	1066	605	813	1018	907
YPR091C	1602	1385	1212	1687	1067	1925	1537	1431
YGR141W	740	522	426	636	484	759	462	542
YAR030C	9	9	9	17	10	11	15	14
YGL111W	2173	924	1364	1734	1554	968	1784	1566
YJR158W	0	0	0	0	0	0	0	0
YHR137W	1828	823	1151	1250	1544	1068.97	1750	1615
YFL011W	15	40	26	69	16	64	18	42
YMR198W	599	394	353	443	391	445	483	410
YCR003W	777	527	352	610	420	672	418	404
YMR316C-B	98	45	68	74	76	82	62	86
YMR316C-A	2.029	8.043	3	2	5.043	3.018	9	6
YDR342C	21485.5	10822.5	10766.2	19340.8	13220.9	10794.5	10548.3	15972.7
YMR163C	493	376	460	561	362	373	537	492
YGR294W	17.197	5.824	16.635	26.219	23.68	36.957	24.161	25.548
YEL008W	2	5	3	5	3	7	4	5
YLL067C	21.21	54.114	19.63	95.701	0	16.67	17.587	84.122
YHR086W-A	0	0	0	3	0	1	0	0
YBR020W	183024	98262	124678	161323	113219	145764	140082	125248
YLR418C	1245	656	758	1043	846	1061	982	864
YDR112W	1	0	1	0	2.025	1	4	2
YER059W	894	614	639	680	651	912	708	621
YNL076W	1145	729	781	989	806	950	895	805
YBL025W	197	107	115	182	148	209	157	157
YOL066C	817	432	552	694	648	655	637	706
YDR126W	275	153	148	253	198	222	211	196
YPL216W	362	265	366	448	247	259	406	375
YOR223W	322	263	250	269	236	434	290	257
YEL022W	1135	1053	1389	1764	750	780	1681	1480
YHR072W	2754	1517.89	1905	2333	2124	2142	2160	2179
YOL019W	4349	2439	2496	3072	2800	3350	3103	2736
YLR463C	112.624	46.331	73.677	136.159	108.622	148	126.686	125.399
YJL190C	13517	4796	5973	8337	8885	8528	7596.75	6957
YMR218C	710	664	725	788	441	614	829	743
YNL265C	1000.99	728.983	725.934	765.95	678.946	1067.99	877.966	711.957
YNL230C	290	224	267	343	236	271	302	293
YLL049W	260	201	232	273	173	266	280	235
YHR211W	763.808	383.512	579.954	722.524	562.533	595.673	571.007	718.43
YPR166C	718	483	481	649	431	628	597	544
YJL042W	2385	1844	1852	2230	1616	2598	2002	2001
YNL301C	2349.41	1008.22	1103.3	2113.13	1690.62	1602.02	1460.5	1748.99
YDR333C	1351	849	1137	1405	916	1070	1300	1239
YMR058W	26498	15886	17123	30514	18151	21520	18384	23905
YDR061W	1044	645	696	847	705	910	771	819
YJR112W-A	484	282	284	348	353	541	323	371
YOR290C	2546	1910	2205	2750	1624	2249	2324	2166
YKL114C	1283	727	922	1060	1030	1072	1158	983
YML024W	15838.3	7338	8527.25	11745.7	11271.7	11750.1	11173.4	9897.22
YML093W	3733	1067	2274	2754	2541	1071	2614	2460
YHR197W	1429	674	1154	1500	1017	350	1447	1313
YDR276C	2055	1061	1312	1487	1288	2101	1475	1338
YLR200W	680	435	419	528	394	524	496	452
YKR003W	801	611	510	689	505	933	637	634
YLR107W	971	568	647	736	503	690	765	737
YMR321C	47.413	0	0	0	74.345	32.707	0	0
YER175C	907	548	559	616	596	948	635	779
YIR012W	2698	1038	1341	1972	2108	1099	1805	1712
YDL183C	200	177	134	243	130	237	145	148
YPL278C	183.401	113.571	113.695	141.911	151.228	182.509	129.811	152.088
YMR105W-A	1	2	0	2	0	5	0	1
YMR118C	5	0	2	6	5	12	3	5
YCL049C	845	523	626	842	540	1033	622	672
YBL066C	1293	643	942	1061	932	1007	1162	1176
YGL120C	5222	1865	3064	3946	3858	2036	4038	3363
YGR271C-A	789	341	532	664	396	232	562	505
YDR169C	1566	1003	1108	1108	1150	1520	1215	1093
YOR057W	753	533	615	781	525	616	767	727
YLR410W-A	0	97.775	258.524	136.667	119.087	171.291	120.577	109.523
YLR169W	1	2	1	0	3	3	1	0
YMR272C	3852	2139	2569	3369	2311	3447	2612	2596
YPR108W	2616	1855	1927	2289	1787	2444	2203	2024
YKL054C	4643	2728	3484	4075	3457	3618	3570	3837
YGR162W	7649	3055	5080	6408	5382	3486	5886	5666
YDL165W	798	413	421	606	597	768	569	500
YDR520C	452	348	454	612	287	293	593	521
YKL023W	530	415	347	403	414	677	417	413
YJR051W	1383	790	920	1202	893	1233	1109	1002
YNL009W	257	201	189	255	187	222	253	209
YFL034W	1081	811	808	1069	771	1041	933	940
YKL164C	12970.2	4565.02	5958.35	7029.47	8346.18	7636.16	6501.17	6693.23
YJR135C	177	110	129	186	125	157	176	155
YGL213C	1215	703.974	770	948.994	789.993	930.994	1016.99	877.938
YOR161W-A	5	0	1	1	0	1	0	0
YMR076C	751	691	884	1065	435	391	906	831
YOR161W-B	18	12	9	21	14	25	14	20
YJR037W	0	0	0	1	0	0	0	0
YNL027W	1182	977	1132	1389	794	1350	1194	1074
YLR291C	1366	646	1014	1108	893	790	1218	1153
YDR210W	528	219.998	258.999	348	378.999	509.999	374	342
YIL122W	489	279	390	463	388	454	456	424
YDL230W	425	310	269	313	336	560	302	333
YJR113C	1564	725.997	817.997	1213.98	1236	1430	1003	949.994
YGL075C	205	121	171	209	162	178	159	179
YHR041C	796	360	390	642	558	669	504	436
YIL156W-B	641	326	283	407	370	652	378	362
YIL156W-A	1	0	3	4.006	2.003	7.015	2	1.001
YLR416C	2	5	3	7.847	7.167	9.207	7.552	3.172
YGR097W	1936	1106	1385	1872	1153	1719	1342	1417
YIL068C	997	776	822	1058	657	847	1019	939
YCL025C	24066.4	10459	10787	13519.5	14116.7	16832.8	12354.4	11560.7
YNR034W	436	367	347	439	311	706	320	324
YOL085C	0	0	2	5	1	0	0	1
YNL282W	441	122	186	262	286	214	263	258
YBR286W	12064	8107	8129	9666	9357	13199	9227	8510
YGL144C	480	318	362	528	336	390	459	419
YDR190C	4008	1737	2329	3004	2794	2323	2871	2535
YAL031C	846	602	540	718	582	965	592	695.921
YBL006C	1225	730	597	983	700	1102	668	692
YNL132W	3320	1215	2405	2979	2163	1076	2771	2652
YBR264C	395	252	240	286	374	414	321	291
YBR231C	434	256	248	340	341	436	318	273
YLR162W-A	7	2	2	9	6	12	4	2.477
YPL197C	1.001	2.008	8.024	2.004	3.004	4.011	6.013	2.003
YHR076W	1417	790	780	1071	938	1239	918	929
YDR462W	688	393	405	522	439	621	366	416
tP(UGG)Q	0	0	0	0	0	0	0	0
YJL148W	2349	838	1274	1569	1452	964	1555	1387
YIL057C	223	148	147	285	62	149	108	144
YPL055C	728	426	426	507	556	698	509	431
YLR353W	1454	740	933	990	969	934	1202	982
YIL020C	311	172	234	304	263	183	238	284
YIL148W	15598.9	7008.94	8084.39	11220.6	11171.4	11329.3	10475.8	9455.86
YNR016C	18716	11795	14031	18660	11039	15797	15734	14751
tY(GUA)J1	2	2	0	0	0	3	2	0
YFR036W	163	69	76	109	136	154	130	124
YER023C-A	0	0	0	1.009	1.024	0	0	0
YHR114W	1103	860	917	1158	752	947	1086	1000
YGR028W	1193	930	880	993	812	1428	1135	903
YER150W	354	358	372	211	267	992	331	250
YNL279W	124	91	120	91	95	225	212	123
YDR400W	724	542	557	677	548	803	847	652
YDL068W	5	4	2	5	1	1	2.014	2
YOL027C	3132	1661	2079	2682	2394	2157	2475	2257
YPL257W	102	99	83	125	47	147	93	99
YPL120W	286	227	246	292	154	274	307	270
YOL145C	2735	1754	2379	2979	1789	1665	2761	2549
YJL099W	562	379	480	561	434	597	583	482
YHR149C	1542	594	933	1314	1056	628	1106	1162
YDR395W	2534	1336	2113	2701	1590	1178	2672	2330
YOL110W	449	285	321	375	369	601	344	335
YDR005C	1204	1027	984	1132	734	1295	1060	996
YMR311C	1929	1415	1313	1416	1455	2627	1408	1302
YHL041W	1	0	0	2	0	0	0	0
YBL039C	4844.44	1371.12	2360.42	3543.16	3518.88	1558	3455.92	3145
YGR188C	323	221	238	357	214	197	242	308
YOR362C	3372	1942	1979	2518	2483	3695	2276	2119
YPR106W	559	345	433	503	412	456	531	469
YLR126C	699	531	589	840	581	770	780	634
YDL053C	1012	697	716	960	710	848	850	723
YML074C	5620	3326	3878	4270	4485	4672	4584	3661
YKR062W	868	569	623	728	670	898	736	644
YBR235W	1384	865	971	1263	850	1095	1103	1040
YER010C	743	459	534	673	525	729	524	531
YML003W	88	96	107	148	73	92	117	131
YMR097C	701	457	483	593	465	724	618	596
YDL133W	953	564	638	747	558	766	684	655
YNL330C	1821	1045	1161	1525	1306	1576	1414	1373
YGR228W	15.084	18.301	24.414	3.039	25.387	8	19.14	16.125
YHR096C	220.849	183.97	169.989	154.856	153.929	302.898	181.988	151.703
YBR008C	751	313	468	605	525	507	528	650
YDL035C	1175	798	1044	1179	816	1029.99	1111	971.986
YMR253C	449	342	334	456	309	550	301	368
YCR102C	289.719	138.296	154.117	190.175	151.796	152.904	127.713	143.408
YJL127C-B	454	260	246	368	226	434	340	329
YOR257W	823	650	589	710	590	849	694	558
YGR002C	703	464	511	680	470	656	572	590
YEL041W	226	211	155	249	138	331	170	200
YGR075C	143	133	157	196	103	109	170	195
YGR253C	3147	1922	2221	2620	2117	2923	2471	2257
YDR510W	2707	1634	1639	2146	2013	2620	1829	1716
YEL014C	1	0	0	0	1	0	1	0
YPL050C	3163	1680	1926	2535	2107	2202	2332	2227
YMR166C	357	219	243	326	261	355	305	292
Q0115	0	0	0	0	0	0	0	0
YPR045C	607	658	606	739	429	744	739	640
Q0110	0	1.355	3	0	0	0	0	0
YPL231W	30667	14169	20263	26428	19391	21234	23904	22003
YLR148W	617	614	782	875	412	499	848	737
YMR137C	364	313	319	395	227	278	362	353
YDL082W	10001.8	3889.96	5127.83	7143.76	7457.92	6386.28	6604.25	6168.57
YKL155C	1126	623	850	983	753	691	797	862
YBR162W-A	1582	828	613	1047	995	1457	959	861
YFL042C	986	741	802	957	625	1262	766	778
YBL083C	358.361	116.532	144.976	227.419	227.017	275.74	241.125	236.285
YDR148C	5531	2800	3396	4157	4749	6065	5124	4815
YHR052W-A	193.271	271.667	311.313	70.724	491.456	318.247	324.801	229.029
YPL096W	674	438	458	507	428	716	585	463
YDR335W	2008	1649	1814	2205	1255	1895	2108	1964
YPR141C	416	324	370	466	264	268	412	367
YJL067W	0	2.025	0	0	0	0	3	0
YMR039C	1845	1343	1371	1348	1469	1961	1702	1334
YIL058W	3	1	3	1	3	4	1	5
YNL320W	559	359	372	504	406	563	422	362
YPL078C	7437	3042	3876	4545	5991	6727	6387	5458
YCR095C	446	317	396	442	299	336	537	365
YLL011W	1621	434	853	1114	1051	390	965	1027
YCR077C	3486	2371	2836	3705	2420	2992	3060	3044
YLR437C	354	225	190	308	255	332	203	274
YFL064C	196.278	0	58.917	67.87	109.995	150.149	47.357	52.726
YNL191W	331	137	184	266	222	263	244	204
YDR237W	1218	670	769	989	823	1044	869	825
YJL110C	1173	834	777	981	758	962	891	849
YKR048C	4721.47	2682.91	2963.88	3778.88	3655.76	4008.8	3415.88	3233.74
YBR001C	965	744	715	864	666	1174	841	875
YPL003W	421	365	206	298	326	755	358	347
YKL108W	497	267	271	351	336	427	326	303
YGR110W	416	278	277	346	341	598	398	350
YJR074W	1264	638	746	958	980	1299	865	923
YPR127W	857	588	597	731	675	992	705	685
YIR028W	47	53	41	99	29	61	63	49
YAL012W	6999	2990	4244	4444	5484	5081	4741	4490
YMR288W	913	424	625	855	561	537	730	707
YIL156W	820	595	650	848	512	780	711	703
YBR241C	673	445	421	516	481	1044	436	472
YHR063W-A	4.019	4.047	5.029	1.005	3.014	0	1.005	2.009
YJL212C	292	95	84	74	144	116	112	112
YPL156C	443	492	439	658	282	558	586	492
YNL312W	1475	898	892	1210	1048	1327	1130	1008
YLR187W	773	558	552	831	529	686	705	652
YDR099W	5662.9	4428.93	4983.8	5553.27	4150.57	5972	5296.33	4838.34
YKL133C	292	377	219	358	221	464	285	294
YLR400W	2	1	0	0	3	0	0	0
YHR170W	5007	2053	3029	3950	3725	2404	3905	3472
YDR259C	89	90	75	116	46	122	108	105
YKL068W	2387	984	1530	2061	1672	1110	1776	1782
YOR032C	314	137	270	205	188	194	257	184
YKL093W	1054	805	660	916	724	1555	708	720
YMR002W	3864	2301	2507	3229	3120	3425	2903	2984
YLR145W	372	207	237	285	266	286	276	255
YLR261C	441.655	288.576	236.028	321.558	263.034	340.652	304.062	240.579
YDL246C	99.237	85.419	159	63.009	200	125.182	202	140.077
YER081W	2301.08	3217.39	1438.53	2314.42	1727.11	5722.27	2022.9	1775.78
YPL178W	1440	858	977	1259	1039	1263	1208	1073
YMR172C-A	1	0	0	0	1	0	0	0
YPR202W	133.032	341.041	342.367	380.538	51.277	98.315	445.056	338.136
YIL096C	587	302	535	538	462	221	707	536
YOL046C	1	0	1	0	1	0	1	0
YFR011C	1235.97	736	771	965.919	900	976.982	1048	944
YIL074C	1750.76	1131.51	1224	1556.4	1348.89	1897.49	1602.88	1398.74
YGL173C	4715	3487	4200	4547	3170	3996	4699	4272
YHL008C	731	540	520	745	575	686	627	619
YLR457C	375	241	276	322	269	384	327	278
YNL249C	382	234	322	322	279	359	363	338
YGR056W	950	745	802	1059	639	793	967	861
YGL065C	861	681	761	1097	576	683	991	900
YOR052C	1181	903	947	779	870	1600	1102	853
YGR116W	3607.99	2589.99	3413.99	4000	2396.99	3047.99	3658.99	3457
YOR343C	35	21	18	29	26	60	19	24
YGL230C	6	4	5	8	4	1	7	12
YOL159C	155	100	165	195	73	133	184	164
YBR185C	587	403	460	661	343	478	579	549
YOR010C	248	126	209	237	175	265	163	216
YDR290W	0	0	0	0	0	0	0	0
YDR019C	1100	730	494	644	745	1388	667	720
YBR150C	651	649.827	611	793.224	373	594	724.786	606
YIR042C	25	67	40	94	35	58	38	116
YFL031C-A	1	1	1	0	0	1	0	0
YER119C	672	487	390	652	516	1046	479	556
YMR196W	1323	1716	1040	1049	991	3173	1163	1239
YMR161W	832	488	464	602	573	760	523	519
YDR499W	732	442	538	765	383	500	653	649
YKL068W-A	297	176	152	198	194	242	202	186
YJL133C-A	474	290	287	378	339	845	353	405
YHL046W-A	0	0	0	0	0	1	2	0
YDL215C	3600	4624	4215	6335	2006	3913	4272	3967
YJR120W	130	40	62	69	86	101	90	151
YLL061W	803	342	427	417	551	543	516	518
YDR110W	876	429	646	809	567	377	797	766
YDR419W	557	366	409	520	426	494	519	508
YOR221C	732	499	592	667	516	795	603	523
YPL214C	832	501	526	740	550	866	662	673
YBL108C-A	21.616	18.336	17.486	22.379	23.465	22.106	19.81	27.767
YGL165C	4	4.014	4.015	6.021	2.005	7	5	1
YOL064C	1316	782	723	1019	875	1277	931	973
YBL023C	1050	612	693	946	662	852	765	799
YOR274W	814	456	550	690	562	641	703	572
YOR329C	1714	1105	1179	1516	1094	1827	1284	1339
YLR005W	1175	724	754	1005	884	1125	998	928
YDR124W	107	77	102	99	74	99	125	102
tI(UAU)L	1	1	0	0	0	3	0	0
YNL267W	1841	1164	1391	1574	1166	1445	1668	1498
YBR134W	2	0	0	0	0	0	1	0
YLL047W	0	1	0	0	0	0	0	1
YLR461W	7.759	6.714	4.235	7.22	13.403	8.372	10.366	4.246
tI(UAU)D	0	0	0	0	3	0	0	0
YLR050C	473	224	257	380	331	461	308	336
YOR124C	1102	1216	1075	1262	737	1296	1207	1168
YDR067C	330	343	354	370	199	350	421	340
YMR056C	432	209	183	291	279	405	226	255
YHR032W-A	114	53	58	96	79	61	92	82
YJL044C	1164	854	1015	1156	745	977	1127	1090
YPR164W	749	596	839	1036	499	588	996	873
YEL060C	13040	9957	8458	10561	8424	19987	9452	9353
YHR195W	853	580	506	601	611	1123	568	522
YLR101C	19.042	19	17	19	15	22.199	17	16.102
YBL107W-A	1.077	13.952	8.479	15.31	1	5.692	15.585	9.023
YML026C	16930.8	7564.82	8082.48	11633.1	10776.9	11471.1	9957.92	9420.83
YPR066W	237	122	134	197	161	251	149	163
YDR073W	683	447	483	624	500	641	640	563
YDR229W	1031	753	690	928	762	1199	776	735
YDL181W	1972	891	1008	1189	1892	2051	1797	1582
YBR022W	380	286	264	338	255	386	339	288
YER177W	14673	8527	9150.12	11034.6	11330.3	15327	10640.6	9399.66
YML048W	6265	3801	3678	5388	4078	5780	4189	4045
YBL064C	2523	1900	1546	2168	1891	4147	1812	2002
YIL045W	291	397	418	353	200	692	350	317
YKL221W	11	11	10	19	8	24	20	19
YGL126W	1823	964	1000	1192	1453	2478	1286	1078
YLR167W	51125.2	22326	24987.6	35477.7	33942.9	39560.3	30748.8	28899.5
YMR270C	1044	580	660	784	669	670	777	762
YLR293C	11407	5119	6811.94	8781.95	8420	8533.9	8299	7206
YLR228C	989	663	725	970	699	940	838	841
YJR053W	256	128	150	223	132	141	186	181
YJL171C	3453	2262	2172	2565	2044	4453	2568	2173
YDR374C	5	9	6	6	1	6	5	13
YKL021C	1963	921	1282	1637	1395	1085	1581	1443
YDL167C	1941	602	1196	1602	1321	545	1502	1433
YLR388W	5772.45	2330.25	2893.43	4027.44	3907.89	3907.44	3538	3552
YLR373C	918	900	926	1215	614	740	1095	1078
YKR001C	4182	2826	3243	4159	2689	3537	3986	3449
YKR054C	1124	705	1068	1134	745	753	1279	1152
YIR034C	1209	489	615	935	913	960	806	884
YGL013C	955	819	934	1291	605	764	1082	1059
YJR068W	1206	844	833	1066	939	1026	1105	958
YGR207C	1731	1160	1100	1417	1208	1789	1339	1293
YDR212W	3602	1869	2562	3273	2429	2449	2923	2676
YNL052W	4170	1736	2064	2506	3819	3861	3412	3142
YGL188C	478	108	239	213	368	429	388	290
YNL025C	253	248	272	331	172	352	295	297
YGR121W-A	4	5	7	3	3	3	2	3
YGR091W	405	265	340	367	306	342	448	391
YDL232W	235	82	101	154	109	184	139	154
YPL119C	272	223	224	264	174	393	199	228
YLR242C	177	227	284	369	157	176	350	288
YMR031W-A	0	0	0	0	2	3	0	2
YJR148W	2077	1468	1611	2095	1649	2214	1612	1543
YJR082C	599	360	360	440	370	524	400	414
YOL087C	2176	1884	1703	2097	1448	2830	1783	1814
YNL134C	12374	7097	7156	7876	8981	11946	8272	8366
YAL037W	105	99	79	98	92	159	104	104
YGL146C	378	304	283	433	331	398	326	427
YCL075W	0	0	0	0	0	0	0	0
YBR262C	1028	503	538	738	660	827	594	587
YPL199C	1201	763	834	1049	854	995	1079	954
YML101C-A	19	10	18	19.476	15	28.512	8.255	11
YFL036W	2253	1395	1751	2303	1346	1642	1810	1899
YDL209C	520	176	235	385	336	206	288	323
YIL051C	1919	1094	1348	1570	1361	1816	1626	1425
YPL057C	3123	1964	2217	3134	1993	2586	2829	2426
YNR010W	290	164	163	219	163	315	225	183
YDR365C	7176	3083	4985	4153	4689	3696	4989	4211
YLR308W	0	0	1	2	0	0	1	1
YNL169C	4395.95	2338	2594	2939	2831	3373	3219	2746
YFR034C	892	436	480	729	644	703	545	576
YHR070W	1286	414	718.99	895.957	975.962	655.943	879	894
YDR460W	596	383	422	465	486	599	472	412
YNL112W	17707	4866	8439	11191	13434	6751	10668	9939
YHL047C	1196	788	789	1632	659	1113	797	1083
YOR360C	1128	624	954	1183	725	555	1319	1165
YOR335C	8699	4079	6027	8049	5813	5450	7135	6722
YDR354C-A	0	0	2	0	0	0	1.101	0
YKL100W-A	0	0	0	0	0	0	0	0
YGL251C	387	224	300	355	221	250	340	348
YER156C	4418	1983	2535	3124	3256	3165	3131	2654
YPL255W	697	406	434	656	517	554	512	537
YOR095C	1912	779	1062	1563	1268	972	1501	1401
YEL038W	749	359	356	589	586	722	458	513
YCL014W	997	557	718	941	591	532	951	879
YOL025W	454	353	364	423	318	455	514	487
YPL208W	897	481	587	788	557	641	697	630
YOL147C	869	372	408	666	599	669	594	527
YNL280C	1554	847	945	1365	1041	1225	1197	1024
YDR007W	1309.92	763.724	692.788	1077.93	887	1204.81	831.925	823.633
YIL160C	74	41	48	58	96	100	83	69
YPR089W	1409	1113	1282	1663	923	986	1609	1424
YBR233W	842	564	520.993	619	638	910	690	574
YPL122C	524	373	486	623	354	376	613	595
YKL104C	4611	2877	3676	3884	3191	5043	4630	3547
YMR313C	945	659	749	900	705	936	825	740
YGL179C	478	366	302	397	382	759	400	346
YGR120C	366	270	295	395	210	267	373	320
YML001W	1895	1120	1129	1633	1191	1723	1496	1256
YLL028W	696	241	347	373	451	303	416	460
YER016W	1192	784	819	931	808	1028	1015	846
YHR061C	628	304	372	592	422	402	422	446
YDR438W	307	226	258	408	220	311	299	299
YNL211C	77	93	73	112	26	62	85	101
YLR124W	4	0	6	3	4	2	1	1
YML058W-A	13	7	17	31	21	18	10	22
YLR026C	1124	657	702	895	839	983	817	746
YJR065C	5265	2910	3089	4039	3540	5357	3636	3408
YDL131W	4496.43	2025.47	2569.82	3271.49	3391.05	3413.26	3244.14	3270.03
YMR095C	25	6	6	18	17	21	13	12
YER138C	33194	19300.4	30972	15888.1	20261.3	24291	28224.8	24078.8
YDL033C	363	213	239	343	291	285	286	309
YMR255W	1073	726	704	903	725	1153	804	751
YHR209W	259	222	250	324	155	314	264	276
YGL247W	236	184	163	233	193	235	245	216
YCR100C	108	94	94	97	81	153	110	117
YDR516C	3089	3869	2310	3328	1997	7234	2001	2304
Q0130	3	0	2	2	1	1	7	8
YPL233W	603	377	388	485	427	595	436	449
YOR255W	1	1	1	2	2	3	0	6
YOR063W	72605	28973	38749	54935	51578	55817	45918	45005
YOR200W	1	1.007	0	0	1	0	1.006	2.017
YGR251W	485	190	290	389	350	238	339	337
YPR047W	370	363	372	429	241	491	394	361
YDR246W-A	18	11	10	20	15	16	8	9
YDR044W	1000	471	645	926	707	840	686	726
YEL016C	871	559	578	744	552	738	653	649
YAL027W	308	249	251	320	254	333	295	269
YKL153W	16.018	7.016	18.03	9.009	33.061	14.018	15.026	5.007
YFL019C	3	4	5	16	5	4	16	7
YMR139W	876	859	734	889	602	1283	910	730
YDL080C	976	500	661	765	763	832	873	786
YOR172W	668	512	614	787	452	595	737	735
YOR105W	157.35	129.583	150.579	192.033	72.983	129.711	199.432	153.22
YJL138C	19166.3	7880.02	11124.9	14793.9	12720.6	13959.8	12746.9	11748.8
YPR143W	1640	736	933.997	1182	1140.99	711.999	1066.98	967
YDR340W	87	298	244	252	42	66	265	209
YNL322C	3372	1771	2074	2260	2458	3158	2354	2174
YPL090C	25053.5	9132.17	12436.2	15750.1	17892.7	16758.3	15002	13539.8
YPR078C	0	4	1.196	1.126	5.612	3.438	5	2.067
YCR075C	497	333	314	402	340	558	336	333
YFL062W	13.32	3.439	0	11.05	1.785	18.756	1.525	7.322
YDR171W	2908	4166	2698	2197	1407	6678	1375	1474
YLR439W	1332	560	702	891	968	988	861	853
YCR020C	126	74	97	137	90	140	124	166
YDR450W	17441.2	6915.18	8460.52	11508.9	11827.1	12724.9	10536.1	9841.17
YCL051W	1233	787	712	915	815	1387	850	903
YCR097W	697	864	602	797	345	694	740	587
YBL039C-A	12.563	2.875	2.581	4.845	11.118	0	6.083	0
YDR235W	482	732	770	835	323	452	921	748
YGL194C-A	92	84	103	122	60	109	132	90
YER038C	237	171	240	225	170	153	243	263
YPR125W	1461	619	881	1161.95	998	852	1188	1027
YHR049W	3233	1872	2398	2609	2511	2299	2490	2072
YBR007C	905	484	640	729	573	660	717	666
YPL001W	413	363	290	487	255	400	405	368
YJL038C	2	3	3	5	4	1	6	3
YNL319W	2	8	11	12	0	6	10	10
YPR178W	640	390	408	464	510	590	518	459
YER079C-A	1	0	2.013	0	0	0	0	0
YDR475C	978	670	700	768	660	1130	764	723
TLC1	1508	1085	999	1824	784	1225	1336	1435
YNL159C	439	370	409	451	267	584	382	399
YAL014C	833	415	508	655	666	795	645	608
YCR020W-B	189	188	158	227	98	119	203	217
YBR243C	1309	780	893	1277	879	1188	1101	1087
YLR181C	654	474	473	660	501	556	563	563
YBL056W	3232	2489	2610	3351	2032	2916	2814	2661
YNL075W	1669	655	941	1185	1193	635	1227	1080
YPL150W	949	713	800	912	692	1099	936	860
YJL012C	2635	1504	1801	2475	1786	2183	2112	2101
YJL065C	607	325	374	494.99	472	560	421.996	465
YKR020W	414	278	283	333	267	428	325	350
YMR053C	182.391	271.285	136.253	201.028	109.765	383.502	151.305	180
YKL066W	357	376	348	447	268	498	441	402
YMR004W	1184	947	983	1116	818	1135	1161	1023
YER083C	1755	884	943	1391	1310	1477	1213	1147
YPL176C	1642	899	961	1312	1019	1297	1206	1127
YHR172W	508	314	339	517	273	270	397	404
YLR263W	298	227	275	385	224	218	360	321
YDL240W	1642	1133	1345	1645	983	1206	1479	1433
YDR401W	15	7	12	17	16	14	15	11.747
YGL118C	3	1	0	1	0	0	0	0
YHR013C	1323	731	899	1040	1023	967	1132	941
YOL040C	22200	10711	12688	16542	17228	16309	15811	14058
YGR072W	749	468	633	665	529	455	748	667
YCL035C	1955	1445	1196	1546	1338	2514	1369	1318
YIL023C	940	514	531	777	736	918	614	645
YNR073C	93.892	37.703	40.496	86.49	53.272	97.032	38.309	53.074
YPR200C	63	35	44	72	48	65	42	40
YIL072W	68	63	45	64	38	102	57	62
YLR327C	4372	3315	3120	4017	2449	6469	2637	3306
YBR229C	1259	950	1041	1250	855	1261	1344	1230
YML133C	466.375	139.914	383.911	347.809	318.738	393.101	313.025	301.28
YOR131C	643	491	448	520	507	782	506	421
YLR455W	852	532	605	737	513	561	623	574
YNL247W	5004	3140	3910	4759	3593	3144	4614	4147
YOR054C	722.752	615.363	541.404	555.569	515.392	1092.6	592.677	494.2
YGL007C-A	11	5	6	11	7	15	10	4
YFR028C	1376	795	830	1241	993	992	1044	1077
YGR290W	0	1.012	0	0	0	1.004	0	0
YOR009W	319	171	214	344	257	332	263	314
YOR072W	13	11	16	6	3	11	7	5
YDR292C	2180	1444	1700	2103	1620	1668	2031	1833
YOR161C-C	5	3	6	12	3	9	7	2
YHR126C	0	4	2	5	2	3	5	7
YMR194W	4293.67	1377.57	1867.3	2809.34	3116.43	2809.95	2696.21	2408.47
YAL016C-A	1	3	2.013	3.037	4.141	2.011	0	4
YMR167W	456	305	394	443	364	394	434	463
YOR249C	341	410	435	497	223	372	515	466
YER117W	15838.1	6818.16	6341.75	9899.48	9837.01	11013	8389.08	7952.35
YOR301W	741	324	437	468	557	495	616	513
YPL187W	12	4	11	26	6	6	9	15
YKL218C	896	638	509	667	643	1097	656	619
YOR140W	2058	813	1230.96	1772	1380.98	1245	1271	1372.99
YDR391C	718	610	490	582	499	1327	584	576
YLL063C	180	132	125	211	197	270	197	173
YAR070C	0	0	0	0	0	0	0	0
YOR276W	3401.98	2055.99	2133.99	2958.99	2225.99	2798.99	2528	2227.97
YMR309C	4835	2572	4461	5993	2727	1861	5407	4980
YOR089C	1685	1124	1107	1352	1236	1874	1212	1122
tD(GUC)N	7.677	3	8	0	10	12	11.83	6.3
YGR258C	836	619	726	791	615	873	807	752
YNL146C-A	25	26	19	13	8	14	18	24
YMR180C	406	251	230	401	317	481	342	353
YGL163C	749	482	570	692	468	558	629	623
tD(GUC)Q	0	0	0	0	0	0	0	0
YDR417C	6.006	3.005	7.009	4.008	18.043	4.006	11.016	5.011
YOL131W	4	2	2	2	3	1	1	3
YOR011W-A	0	0	0	0	0	0	1	0
YPL283C	1872.96	1048.71	1384.91	1874.49	1056.96	936.076	1509.65	1982.09
YBL021C	365	225	234	346	322	320	300	305
YHR215W	193.984	121.29	124.776	151.378	155.392	261.355	143.837	166.939
YLL045C	27905.7	11333.6	14329.3	20351	20198.4	18808.5	17539.1	16950.4
YLR156W	18.421	20.63	17.412	25.752	18.492	37.988	18.328	34.386
YLR007W	737	362	439	543	629	523	578	543
YNL261W	422	298	395	439	328	314	557	460
Q0092	0	0	0	0	0	0	0	0
tE(UUC)Q	0	0	0	0	0	0	0	0
YNL305C	969	723	659	785	716	1468	689	787
YJL046W	482	437	432	522	316	410	510	444
YKR078W	401	316	419	539	310	347	494	437
YOR191W	1523	1129	1384	1569	1058	1328	1502	1341
YEL074W	49	47	55	68	47	74	69	72
tE(UUC)M	0	0.5	0	0	0	0	0	0
tI(GAU)Q	0	0	0	0	0	0	0	0
YOL166W-A	0	0	0	0	0	0	0	0
YDR272W	1435	1086	973	1132	1149	1823	1162	1023
YGR289C	970	708.988	660	784	625	1201	675	801
YML020W	745	594	526	727	497	832	545	568
YLR103C	540	340	357	509	339	345	413	419
YOR294W	1715	537	859	1107	1264	575	1033	994
YEL062W	321	274	304	354	236	354	366	322
YPR064W	4	2	3	8	4	5	3	1
YPR031W	758	367	519	729	530	380	656	641
YLR038C	2561	1321	1372	1812	1921	2414	2305	2162
YNL096C	7328.15	2599.26	3867.63	5166.63	5460.6	4234.49	4928.58	4551.4
YDR038C	2288.93	1289.6	1474.2	1808.95	1674.38	1821.98	1853.76	1716.18
YPR160W-A	0	0	0	0	0	0	0	0
YDL187C	8	10	10	7	8	17	8	11
YBR024W	393	301	264	324	274	538	329	278
YER171W	1180	738	993	1300	841	783	1271	1183
YDL047W	2355	965	1369	1727	1816	1689	1496	1513
YML046W	635	634	856	927	425	474	987	856
YGL124C	491	443	467	504	348	562	525	539
YMR276W	3134	1879	2125	2700	2680	3027	2174	2303
YEL059W	8	8	9	7	8	18	8	13
YDL160C-A	127	89	88	96	95	138	97	108
YLR165C	277	270	247	292	218	366	274	244
YCR069W	1773	1108	1071	1596	1258	2099	1329	1300
YKL223W	0	0	0	0.5	0	0	0	0
YGR146C-A	2	3	4	7	2	3	9	3
YKL027W	1576	573	842	1096	1041	848	1074	984
YJL173C	625	483	465	587	515	615	551	547
YDR152W	2131	1094	1346	1686	1477	1203	1491	1417
YKL127W	3075	1661	1931	2311	2288	2952	2532	2284
YDR309C	5984	2430	3749	3347	4327	4272	4621	3765
YLR386W	866	615	700	887	590	696	849	757
tN(GUU)Q	0	0	0	0	0	0	0	0
YLR371W	1713	1179	1290	1682	1010	1422	1395	1401
YDL169C	262	297	207	234	177	459	197	245
YLR092W	357	201	209	332	295	385	261	275
YER044C	604	429	423	709	331	650	385	351
YMR072W	3217	1958	2258	2555	2213	3277	2643	2115
YJR033C	914	738	778	801	574	1070	851	820
YKR056W	2287	729	1355	1738	1672	722	1696	1551
YGL011C	3462	2049	2339	2666	2410	3495	2549	2394
YIR036C	826	506	480.997	572	651	1044	570	524
YMR123W	932	538	627	843	711	734	770	743
YDR406W	1217	1790	1505	2022	555	1310	983	1135
YGR073C	85.203	48	54.224	68	49	65.189	55	61.191
YGR209C	4821	2179	2236	3372	2621	4385	2695	2666
YJL150W	4	5	2	1	1	0	4	3
tS(UGA)E	8	5	6	5	3	3	3	4
YNL050C	753	301	489	542	526	405	583	497
YMR304C-A	2123.15	1831.83	1989.69	2506.95	1493.78	2181.97	3016.22	2082.67
YLR240W	797	479	582	684	494	708	632	658
YGR093W	802	452	675	849	602	561	872	733
YDL234C	2373	2284	2007	2240	1448	4081	2087	1906
YPR108W-A	0	0	2	1	1	0	1	1
YNL136W	929	641	642	765	685	878	710	698
YKL049C	624	370	348	453	407	439	436	384
YJR080C	1474	995	1036	1346	1126.94	1510	1311	1231
YNR038W	1288	512	858	1122	824	379	1122	1116
YGL140C	1701	1217	1356	1780	1029	1381	1621	1653
YCL029C	1019	502	607	766	756	756	757	715
tY(GUA)Q	0	0	0	0	0	0	0	0
YFL038C	6446	3589	3815	5116	4892	6237	4432	4092
YJR131W	690	426	459	596	413	597	630	549
YNR012W	1017	422	731	867	744	388	950	871
YNL110C	2348	939	1420	1768	1538	844	1698	1536
YAL068C	0	0	0	0	2.082	0	0	0
YDR367W	410	333	394	677	271	316	522	464
YIL053W	7859	3912	5181	7616	7856	7358	8234	6215
YPL059W	1282	715	729	970	825	1095	830	810
YGL253W	28571	15292	19222	30184	16588	21285	19984	20918
YHL032C	2745	1560	1765	2133	2006	3129	1931	2097
YJL010C	1480	672	1155	1459	962	521	1453	1222
YHL045W	1	2	2	4	3	2	1	2
YOR337W	1158	298	603	819	789	361	852	814
YMR010W	879	859	946	1433	560	717	1156	1077
YOR097C	302	243	200	302	245	360	270	244
YHR118C	377	168	269	291	274	214	338	299
YGR024C	1003	828	818	1107	569	725	1028	958
YOL023W	815	569	582	799	499	621	563	643
YPL253C	343	239	263	404	233	236	307	300
YOR008C-A	0	0	0	0	0	1	0	0
YER154W	2540	1330	1501	1907	1871	1964	1728	1679
YBR300C	0	3	2	2	3.349	5	3	1
YEL036C	3341	1448	1801.67	2484	2487	2398	2051	2148.85
YBR260C	1024	573	662	828	673	861	832	687
YPL124W	218	170	169	215	138	202	176	203
YAL042W	5210	2818.99	2903	4099	3862	4829.99	3530.99	3350
YAL035W	8033	3545	5198	6758	5410	4193	5769	5554
YNL286W	615	392	443	516	433	574	522	461
YDR001C	2459	2146	1748	2101	1655	4123	1843	1847
YIL162W	2593	1914	1799	3102	1654	2599	1709	1986
YOL141W	242	114	194	260	192	84	227	222
YHR145C	24.718	85.078	76.259	91.553	19.385	30.51	128.535	84.47
YBR195C	601	225	347	453	438	399	452	429
YIL039W	2982	1632	1773	2498	1913	2635	2164	1988
YGR122W	647	585	544	670	436	833	728	584
YPL092W	1559	665	625	817	887	906	847	864
YGR161C-D	622.731	165.671	497.425	893.939	369.697	454.601	624.284	828.664
YMR315W	2076	1571	1451	1869	1573	3397	1709	1562
YGR213C	64	48	38	62	19	87	35	33
YDR384C	1153	557	694	1284	802	778	739	916
YML007W	2732	1871	2292	2791	1896	2358	2349	2190
YER063W	1889	1240	1174	1551	1419	1862	1410	1259
YDR481C	2562	1480	1480	1939	1673	2797	1681	1749
YER014W	584	431	379	574	467	643	523	491
YPR041W	6217	2941	3889	5226	4368	3548	4638	4372
YNL213C	778	535	456	617	512	575	562	493
YKL006C-A	521	221	231	367	298	411	261	273
YDL159W-A	0	0	0	0	0	0	1	0
YBR058C	1715	1011	1271	1553	1133	1261	1551	1401
YLR024C	354	345	457	485	217	261	545	500
YLR071C	1414	977	1437	1725	900	878	1598	1472
YHR092C	135.296	90.017	121.022	154.053	99.02	122.033	140.023	143.036
YDL199C	225	307	172	231	175	465	205	248
YHL007C	3148	1305	2081	2641	2286	1646	2374	2227
YER181C	2	1	2	1	0	1	0	0
YNL228W	2.005	5	2.013	6.063	7	3	3.008	6
tV(AAC)O	0	0	0	0	0	0	0	0
YDL064W	1067	539	575	791	640	774	737	676
YDL031W	3228	1230	2129	2770	2196	1100	2344	2179
YMR257C	578	595	617	810	285	435	727	638
YBL108W	0	0	0	0	0	0	0	0
YDR046C	4359	2270	2542	2968	2831	3510	3043	3077
YOR253W	917	519	414	590	479	642	594	504
YOR202W	967	453	480	721	716.833	873.885	633	689
YEL010W	0	0	0	1	0	0	0	0
YGL245W	10291	5365	7309	8843	7123	8614	8470	7611
YGR006W	257	133	132	174	169	198	158	163
YGR079W	1418	209	562	713	1021	214	846	965
YDL119C	283	233	192	244	174	358	211	224
YKL151C	918	666	562	677	630	1552	584	628
YGL198W	1513.98	785.972	708	997.962	1108.97	1570.89	949.951	875.938
YDL086W	1423.89	893.988	893.959	1269.82	1097.86	1527.94	1039.96	908.952
YBL091C-A	350	222	212	266	237	488	251	201
YLR361C-A	228	173	134	189	154	226	176	159
YBR141W-A	1	0	0	0	0	1	0	0
YOR170W	0	1	1	0	1	0	0	0
YHR038W	350	329	294	436	232	376	348	309
YML069W	2930	2100	2277	2753	2004	2657	2568	2299
YKR019C	465	243	294	349	332	473	331	322
YJR073C	13632	6376	6654	11383	8503	13953	7810	8007
YGR279C	18012	8654	12285	15912	12501	12735	15108	13609
YCR073C	474	307	452	702	290	324	478	507
YCR022C	11	7	7	16	6	10	4	12
YLL015W	1375	1178	1343	1645	886	1296	1489	1483
YNL195C	51	46	23	33	42	100	35	41
YDL134C	2609.06	1611.72	1774.89	2257.12	1880.79	2514.95	1983.52	1791.19
YFL060C	205.9	170.008	159.71	198.041	138.66	209.421	174.42	174.807
YDR173C	248	172	156	232	156	264	238	215
YMR100W	760	592	698	747	502	532	812	630
YCL057W	2908	2040	2251	2657	2156	2877	2797	2438
YOR335W-A	0	0	0	0	0	0	0	0
YBR072W	748	340	523	227	447	442	494	315
YBR005W	998	699	525	766	639	1836	694	599
YPR123C	35	27	29	28	39	63	41	59
RUF5-2	753.144	2034.24	1853.44	2437.55	599.058	779.597	831.066	559.553
YDL173W	1990.99	1316.99	1212.95	1536.98	1482.97	2270.98	1477.98	1272
YJR047C	27.013	8.003	20.009	42.017	18.005	26.003	11.003	17.014
YMR006C	4260.41	1942.37	2207.78	4784.53	2082.43	2097.45	2194.17	2553.43
YKL145W-A	58.796	0	7.23	27.05	47.26	43.696	12.524	14.952
YAL016W	3247	2287	2510.99	3069.96	2124.86	3084.99	2953	2622
YMR292W	459	472	539	735	293	372	659	523
YHR011W	378	217	278	331	237	293	281	287
YPL152W	394	282	248	350	281	431	314	292
YLR183C	1417	817	934	1147	962	889	1085	977
YNL077W	1003	696	936	925	652	745	677	680
YBR109C	2907	1603	1933	2425	1934	2748	2315	2017
YBR172C	2994	1009	1959	2176	2085	1084	2324	2011
YDR346C	4004	2020	2542	3365	2720	2647	3108	2700
YAR002C-A	3648	2483	2442	3160	2585	3315	3032	2748
YOL077W-A	2586	1428	1299	1544	1958	2169	2056	1734
YPL029W	681	351	432	608	394	384	533	519
YHR146W	3914	2234	2494	2607	2979	3065	2955	2382
YNL019C	0	0	0	0	0	0	0	0
YDL242W	2	1	4	2	1	2	2	7
YBR189W	26091.1	11047.2	13835	18954.8	19255.6	18062.6	17271.7	16117.1
YER085C	0	4	6	7	4	6	5	12
YJL225C	1658.18	1772.46	2046	2519.7	1681.38	2966.86	2359.57	2365.41
YKL064W	2006	1427	1647	1852	1222	2192	1665	1639
YLR265C	432	422	483	625	263	367	600	574
YKR022C	779	475	472	662	481	709	536	529
YLR287C	900	480	681	833	604	401	847	766
YPL174C	524	553	682	700	312	446	731	664
YOR070C	992	690	743	827	708	1135	794	729
YDR403W	54	85	70	123	62	103	79	84
YOL093W	890	329	486	593	608	395	595	536
YOL042W	611	437	435	561	390	523	513	506
YIL070C	1971	1123	1122	1606	1096	1372	1219	1253
YCL037C	40	14	26	25	31	10	33	22
YIL025C	7	0	3	0	3	2	1	0
YDR545C-A	23.405	10.074	18.928	29.866	0	36.095	27.265	25.203
YNR071C	64	32	25	45	29	51	38	30
YML131W	1327	824	839	1055	821	1386	921	1043
YNL245C	434	213	328	332	388	379	373	330
YNR024W	627.974	243.888	360	423	483	295.933	435.823	375
YFL013W-A	4.004	7.024	4.019	2.002	2.003	6.007	4.005	1
tP(AGG)N	0	0	0	0	0	0	3	0
YLR329W	22	22	21	41	14	18	27	33
YPL043W	3318.99	1092	1872	2426	2147.99	965	2327	1973
YCL045C	4330	2557	2852.97	4036	2745	3509	3374	3331
YBR056C-B	0	1.003	0	5	0	2	1	1.004
YKL002W	1899	1214	1140	1402	1382	1808	1299	1233
YDR328C	2269	1540	1370	1775.99	1743.98	2474	1577	1564.99
YIR009W	159	95	91	135	107	151	134	129
YBR154C	2660	1276	1627	2165	1770	1492	2034	1823
YLR001C	766	618	717	878	516	827	851	792
YAR035C-A	0	0	0	0	0	0	1	0
YKR101W	274	265	209	305	204	256	271	274
YMR230W-A	1	3	7	6	1	3	7	9
YER115C	446	284	305	424	292	397	378	395
YHR124W	128	126	117	137	76	132	95	82
YER148W	2438.99	1273.99	1574	2089	1764.98	1817.94	1912	1665
YCR050C	1	0	1	1	0	2	1	0
YMR240C	533	273	359	458	383	448	450	389
YOR303W	4903	2697	2514	4033	3447	4097	2865	3248
YIL087C	348	263	232	323	246	563	273	268
YMR192W	653	430	558	730	408	531	759	611
YCL074W	0	0	0	0	0	0	0	1
YJL221C	260.553	166.277	235.825	258.623	181.305	249.415	216.244	216.866
YMR229C	4842	2266	4013	5338	3056	1803	4742	4453
YLL038C	534	309	349	418	397	400	366	393
YOR056C	2483	858	1355	1741	1892	1052	1816	1610
YOL108C	667	388	393	439	404	704	422	363
YOR270C	7961	4799	6096	7747	5057	5937	6803	6540
YDR106W	28	29	25	32	20	32	23	30
YOL068C	2105	1184	1511	1776	1350	1510	1750	1540
YMR182C	335	210	263	396	335	248	241	323
YBR201W	568	297	328	369	400	609	544	333
YLL043W	2726	1606	1711	2440	1798	2239	1960	2016
YDR415C	773	489	453	580	498	698	620	542
YGL161C	1786	1001	898	1347	1135	1742	1125	1074
YOL133W	453	296	287	341	341	550	325	358
YDL074C	1547	1164	1370	1842	1014	1088	1756	1442
YNL263C	1615	912	998	1317	1098	1330	1289	1165
YHR217C	9.672	4.817	9.148	20.23	14.791	19.551	15.992	20.19
YDR128W	1361	884	1111	1329	990	993	1229	1262
YOR193W	190	236	226	246	120	215	296	222
YER028C	51	33	40	56	38	70	39	45
YMR052W	127	140	152	187.899	95	130	193	144
YIL029W-A	0	1	0	0	1	0	0	0
YMR294W-A	1	6.015	1	5.01	3.007	4.009	10.031	0
YKR076W	698	489	476	613	421	851	504	501
YDR225W	14080.6	5132.56	6516.26	9111.05	8785.94	10000.6	7726.38	6584.87
YDR270W	1073	760	842	1441	640	822	849	1102
tL(UAG)J	22	11	14	9	7	15	13	7
YPR033C	5746	2878	3801	4877	3921	3828	4435	4026
YGR230W	253	171	170	232	208	271	240	213
YPR062W	1944	1198	1071	1647	1419	1606	1314	1285
YDR528W	814	378	453	524	572	476	562	479
YER173W	562	351	409.987	558	401	470	517	473
YBR026C	1747	1223	1269	1429	1200	1998	1373	1287
YDL185W	10135	6141	8186	10072	6925	8753	8664	8179
YBR091C	278	129	128	191	174	216	182	137
YNL094W	1458	1040	1095	1347	1023	1559	1370	1165
YGL056C	3041	1159	1819	2244	2101	1374	2204	2170
YPL227C	1030	613	626	847	622	657	885	732
YLR222C-A	15	8	26	28	3	6	31	32
YDL010W	945.997	750	627	852	578.984	1138	741	721.991
YML019W	864	628	699	963	513	675	878	745
YDL045C	998	596	621	812	678	889	749	659
YLR163C	1407	765	817	1205	851	1004	991	958
YLR178C	802	741	529	471	538	2248	531	505
YKL225W	0	0	0	0	0	0	0	0
YHL002C-A	2.011	1.009	3	2.007	2.008	1.008	1.002	4.033
YJL175W	0	0	0	1	1	0	1	0
YBL079W	1572	1148	1668	2075	1042	860	2050	1864
YNL056W	722	375	441	624	482	698	472	429
YFL001W	891	449	542	751	648	512	723	635
YDR150W	2406	1584	2134	2502	1605	1743	2464	2332
YER147C-A	15.009	4.012	2.003	3.002	17.015	18.062	8	1.001
YKL170W	760.991	481	412.999	581.992	541.992	707	502.984	464.983
YPR157W	146	84	137	83	116	140	143	105
YPR137C-B	2349.71	119.317	630.389	0.002	1615.73	2019.11	512.617	0
YLR384C	3388	2090	2905	3708	2292	1934	3358	3134
YPL060W	324	276	275	303	211	364	277	275
YML099C	1279	792	922	1185	811	825	965	1019.93
YLR421C	1225	975	887	1102	839	1201	1024	995
YLR090W	802	550	495	695	478	720	474	490
YMR325W	0	0	0	0	0	0	0	0
YJR064W	4931	2359	3082	3963	3310	3209	3825	3379
YML022W	3097	1497	1712	2338	1864	2005	2103	1892
YER046W	379	225	193	322	245	451	254	248
YMR029C	1134	1046	1051	1250	724	1271	1187	1021
YIR030C	66	69	84	138	53	112	138	119
YKR050W	752	504	509	667	560	748	646	650
YMR121C	781.882	501.763	503.637	616.568	571.551	1014.88	616.292	508.255
YGL017W	563	284	337	459	373	533	433	351
YDL150W	1612	537	841.999	1086	1260	642	1045	939
YNL038W	523	579	485	613	293	405	579	484
YHR001W-A	1512	926	1028	1175	1105	1516	1734	1577
YOL165C	2.487	3.313	2.675	7.39	4.901	7.668	4.416	3.814
YIL139C	200	216	221	302	151	197	286	227
YLR246W	751	475	478	587	456	682	518	473
YJR119C	313	290	282	426	232	220	376	390
YLR359W	7998	4772	4446	5398	5349	7748	5868	4868
YLR199C	892	618	606	788	623	778	855	657
YJL206C	294	293	277	370	248	326	301	333
YIL142W	4993	2479	3039	3893	3530	3616	3648	3323.99
YGL082W	1358	1087	963	1157	880	1653	1102	976
YNL138W	4168	2651	3059	3600	2856	4014	3410	3257
YOR133W	33760.6	16161.2	21929.1	28115.6	24416.1	27157.2	25432.5	23896.8
21S_rRNA	43	44	40	81	20	39	48	46
YGL142C	657	575	622	722	470	623	717	688
YGR179C	514	321	297	417	301	427	368	380
YGR102C	471	309	310	382	353	506	346	392
YBR139W	1747	1683	1191	1394	1070	2874	1260	1230
YHR188C	2996	1794	1937	2502	2069	3111	2221	2135
YKL106C-A	1	2	0	1	1	2	0	1
YNL116W	972	407	609	725	708	548	748	737
YNL139C	913.472	846.153	1102.19	1241.44	673.31	753.325	1394	1197.45
YDR361C	1506	819	1027	1335	1082	887	1289	1239
YLR445W	2	1	2	0	3	2	0	2
YGL255W	3131	1047	1403	1703	2056	1506	2069	1753
YFR007W	413	311	301	379	270	418	352	348
YLR333C	4814	1737	2340.22	3120	3588.22	2926	2969	2659
YHR103W	1909	1181	1418	1542	1201	1497	1652	1460
YHL030W	640	627	752	922	399	641	791	745
YGL077C	6372	3188	4021	5075	4076	3340	5248	4397
YPL204W	3942	2017	2497	3074	2855	3411	2982	2792
YPL251W	2.005	3	1.008	0	0	1	1.003	3.015
YIL009C-A	356	182	271	268	277	396	319	321
YOR091W	2005	773	1090	1353	1658	906	1409	1388
YGR026W	1841	1800	1827	2075	1167	1726	2237	1937
YAL040C	1987	1131	1446	2117	1364	1268	1811	1909
YDR288W	538	413	361	478	394	544	498	464
YGL208W	558	382	374	384	409	711	380	420
YNL284C	1384	950	918	1228	891	1239	1166	1029
YIL164C	422	203	239	242	272	378	265	279
YOL143C	2371	1348	1522	2015	1689	2370	1718	1705
YBR237W	1057	680	720	948	701	873	853	808
YBR197C	537	302	300	389	422	455	338	378
YHR147C	1083	609	618	863	690	956	630	660
YJL093C	1367	955	932	1268	920	1507	1071	1228
YPL126W	3763	1492	2811	3466	2620	1159	3413	3127
YMR317W	18	11	23	24	12	27	19	14
YOR251C	1629	737	859	1255	1103	1379	1170	920
YPR181C	6782	3654	4460	5920	4843	5959	5146	5095
YCL008C	763	385	491	589	574	655	561	533
YOR107W	1851	508	913	908	1386	770	1299	1081
YML005W	471	224	325	429	289	297	402	388
YNL215W	1120	691	713	843	833	1085	821	798
YCR075W-A	199	106	133	155	160	268	158	122
YDL059C	145	76	82	100	73	115	97	100
YOR204W	5204	1850	3573	4239	3995	2456	4130	4182
YEL012W	1080	873	652	810	713	1593	739	732
YBL040C	1460	1296	1050	1485	747	1350	1510	1275
YPR043W	14261.5	4987.85	6471.28	9419.48	10164.5	10417.4	8523.19	7705.25
YDR382W	15108	8513	9668	13387	11077	11109	12124	10823
YDR483W	7018	3930	4106	5508	4575	6414	4848	4408
YER061C	713	357	381	382	498	639	499	468
YLR022C	635	278	416	476	452	407	530	431
YLR402W	79	29	51	63	56	77	49	67
YLR073C	383	66	160	229	265	51	265	237
YER183C	549	270	300	435	382	528	399	379
YHR090C	568	342	376	472	416	430	435	404
YOL021C	3197	1413	2058	2590	2381	1778	2478	2378
YHR030C	1955.87	1327	1512	1818	1345	2612	1886	1492
YBR295W	633	331	485	620	363	483	554	530
YKL018W	527	283	302	434	391	423	431	396
YIL011W	100	68	84	145	88	111	105	118
YEL034W	14041	5638.97	6566.95	9653.96	10131	9528.96	8208.98	8233.97
YHL015W	20647	8816	10833	15073	14392	15177	13474	12829
YNR050C	2069	1141	1371	1812	1560	1581	1623	1439
YDR134C	5842.44	2840.3	3122.6	4077.51	3468.01	4137.6	2798.85	4609.42
YKL208W	338	237	201	296	259	395	259	232
YGR004W	369	240	282	399	263	257	453	344
YML110C	2430	1648	1706	1939	1756	2446	1787	1691
YGL048C	4374	2628	2966	3289	3173	4610	3259	3044
YGL243W	476	314	415	508	328	416	444	468
YKL106W	780	295	419	515	527	465	656	530
tN(GUU)N1	17	7	6	7	11	17	7	10
YPR029C	1718	1566	1681	2002	1222	1589	2026	1885
YJL034W	23236	11071	14976	15862	15296	21713	18479	14300
YFL048C	1957	1258	1289	1599	1377	1852	1557	1471
YLR117C	1055	773	835	1151	675	781	921	878
YOR176W	2323	1590	1554	1814	1597	3009	1903	1597
YOR109W	1540	1148	1293	1552	1108	1412	1532	1433
YBL089W	518	312	345	463	352	497	436	397
YDL084W	9189	6176	7385	8984	6080	7217	8688	7110
tC(GCA)Q	0	0	0	0	0	0	0	0
YGL116W	1095	449	717	798	705	601	793	713
YNR034W-A	495	873	452	332	262	2234	325	343
YCR024C	359	288	290	386	242	325	298	368
YIL102C-A	172	121	139	202	105	190	168	203
YMR102C	950	816	919	1128	618	1246	838	831
YCR071C	754	418	397	532	513	634	470	467
YDR175C	1246	661	658	898	800	1059	800	779
YOR189W	462	337	314	383	411	495	371	379
YOR154W	773	411	599	762	509	366	779	718
YPR121W	655	359	432	573	452	611	521	521
YBR070C	601	309	346	462	456	528	419	448
YOR396C-A	0	0	0	0	0	0	0	0
YLL017W	3	3	3	3	3	4	6	10
YDR351W	1090	709	840	1107	674	657	994	923
YNL315C	1779	962	1036	1476	1119	1405	1138	1073
YPR174C	520	319	355	410	395	403	356	372
YJR045C	23336	13586	16630	19984	14311	18920	14178	14474
YMR008C	4201.59	2786.63	2933.22	3985.47	2408.57	4694.55	3091.83	3198.57
YDR349C	2407	1293	1566	2169	1629	1946	1887	1867
YDL171C	6098	2703	4563	5568	3910	4105	4902	4949
YKL062W	2214	792	1506	1378	1294	1088	1641	1590
YJR010W	502	327	319	429	416	541	509	411
YJL218W	39	20	25	53	33	43	48	35
YIL126W	2599	1817	2081	2797	1719	1973	2384	2115
YDR093W	1858.09	1106.22	1598.97	1772.71	1248.07	1384.12	1788.89	1688.59
YMR282C	839	563	655	891	620	703	845	744
YIL109C	5660	3126	3938	4624	3932	4859	4553	4211
YFL022C	7068	3000	4091	5274	5266	4912	4776	4512
YPL109C	451	418	415	439	321	576	533	439
YJL156C	1009	708	785	1009	660	748	864	851
YNL071W	6384	4007	4325	5255	5289	7102	5046	4584
YMR088C	1593	976	1173	1630	1012	1420	1493	1400
YGR211W	4205	1772	2886	3362	2724	1557	2573	2568
YKL139W	604	356	524	635	418	310	602	538
YJL069C	1462	372	727	1075	896	311	985	932
YDR323C	223	196	179	247	163	252	226	215
YDR344C	28	9	16	20	14	9	15	23
YJL016W	706	565	550	577	433	864	593	553
YDR444W	1122	551	773	1030	756	718	848	814.994
YPL189W	67	32	49	65	29	46	45	65
YLR285W	1051	678	785	1047	726	774	988	787
YLR267W	69	85	62	96	35	97	89	63
YDL219W	398	374	328	515	213	322	403	406
YNL017C	5	0	1	5	3	4	6	1
YCR024C-A	1278.45	1205.46	1673.25	1980.81	761.124	831.009	1988.34	1716
YCR024C-B	1569	2651	3694	4663	992	1077	4244	3690
YKR024C	1396	340	656	1097	881	275	876	878
YBR156C	575	365	427	492	375	448	570	485
YOR076C	442	453	404	556	258	388	545	513
YEL059C-A	220	102	113	173	162	248	161	159
YDR405W	1257	865	877	1004	1030	1156	877	809
YOL091W	73	60	112	138	41	51	91	80
YCL031C	1434	843	1128	1434	957	794	1548	1322
YIL027C	572	459	469	642	242	464	563	507
YLR459W	688	678	702	1044	414	597	949	904
YNL243W	3968	2155	2314	3277	2581	3904	2626	2867
YNR026C	1036	566	690	887	775	814	852	847
YHL044W	48	74	57	68	33	85	72	97
YPR204W	7283.65	4461.51	5086.44	6011.32	5380.12	6895.46	5910.53	5250.93
YNL297C	864	1083	1225	1471	562	785	1447	1235
YBR170C	886	725	659	816	644	930	732	749
YGR149W	622	727	636	720	293	759	719	639
YDR458C	1345	949	1130	1367	826	993	1284	1245
YKL193C	883	762	799	843	617	1187	890	790
YPR099C	12.03	11.025	12	12.125	17.128	20.059	12.023	15.069
YOR135C	0	0	0	0	2	2.006	0	1.003
YLR310C	2752	2074	2735	3412	1689	1903	2892	2822
YNR008W	895	608	569	775	613	836	642	644
YJR150C	0	2	5	1	0	6	2	0
YBR301W	6.441	14.205	5.728	7.28	3.977	12.034	4.432	7.682
YLR003C	874	516	856	1024	573	345	1066	871
YER113C	1232	717	881	1160	754	777	1092	1102
YHR122W	824	329	464	579	592	474	531	520
YHL017W	844	642	623	849	536	754	836	728
YJR010C-A	427	242	235	379	306	412	318	298
YIL085C	1698	979	1103	1494	1130	1333	1416	1283
YMR190C	718	499	604	765	535	547	668	657
YLR325C	11033	4259	5298	6995	7394	7251	6743	5983
YCL076W	0	0	0	0	0	0	0	0
YOR272W	2696	891	1384	2090	1974	1048	1817	1726
YOR058C	683	500	519	690	389	522	624	552
YER172C-A	0	0	1.013	0	0	0	0	0
YAL064W-B	34	17	15	21	31	32	22	18
YDR413C	6.013	2.003	5.042	3.012	14.106	8.043	12.027	5.024
YBR203W	867	390	727	723	434	482	684	767
YAR029W	21	11	17	29	21	24	18	13
YNL238W	2638	1334	1546	1849	1793	1881	1724	1748
YJL198W	2999	953	1593	2272	2203	1325	2079	2107
YOL135C	356	215	174	233	251	303	263	246
YOR323C	3755	1901	2364	3058	2836	3252	2994	2713
YLL041C	4734	1880	2427	2940	4206	5004	4203	3863
YKR074W	1336	975	752	1010	698	1301	912	870
YMR274C	354	205	239	327	220	281	305	285
YER026C	7809	4613	4841	6841	4471	6055	5779	5353
YMR201C	500	331	336	398	375	495	427	388
YLR069C	2735	1412	1619	2325	1737	2033	1760	1771
YML042W	203	197	167	257	189	322	216	265
YMR050C	720.812	340.39	877.683	416.304	522.491	651.553	143.511	643.216
YDR069C	591	653	609	716	429	744	719	702
YOR298W	37	33	42	66	37	39	57	75
YEL066W	647	329	357	522	480.878	510	408.836	396
YPR035W	30209	15842	16921	22211	19048	23363	17539	16125
YDR014W	195	214	258	336	127	150	343	277
YDR227W	1015	688	1034	1186	667	617	1087	1030
YPR060C	777	401	478	638	562	451	768	576
YMR037C	1640	1347	1491	1759	1194	1595	1644	1600
YCR038C	273.838	217	204	287	196	350	280	240.875
YNL257C	1291	1035	1180	1487	801	1104	1348	1258
YCR072C	1454	272	651	906	908	218	808	838
YBR093C	517.716	290.717	281.997	401.35	284.38	569.063	291.262	283.149
YNL092W	126	135	86	86	82	198	111	117
YGR045C	19	17	14	16	20	20	13	17
YAL037C-B	12.014	12.022	15.028	4.005	27.047	18.023	23.042	5.008
YLR134W	638.086	370.58	449.691	588.004	447.694	565.895	532.867	530.009
YOR218C	1	1	0	0	0	2.015	3	2
YMR203W	4871	2603	2908	4162	3270	4104	3444	3454
YKL096C-B	1	1	0	0	0	0	1	0
YPL225W	2462	1971	1385	1879	1458	2392	1764	1568
YPL270W	1871	1167	1283	1539	1179	1727	1427	1449
YDL012C	722	408	405	602	518	749	520	541
YDR218C	9	14	10	14	4	21	13	16
YLR299W	1802	1163	1091	1277	1086	2074	1142	1090
YFL003C	58	32	36	41	33	47	69	69
YPL051W	398	191	235	343	268	306	313	288
YNL054W	1126	740	893	1092	792	926	1051	952
YDR156W	874	326	450	587	632	435	557	554
YPL062W	1	4	3	5	2	3	0	3
YPR155C	999	837	797	888	653	1123	941	913
YOR137C	643	601	523	687	398	833	511	509
YKL123W	113.623	115.824	102.594	122.893	72.144	204.165	125.625	99.503
YKL172W	3859.86	1538	2156.78	2959	2768	1366	2567	2305
YNL336W	954.043	694.016	767.459	960.921	605.178	1205.56	946.154	834.072
YDR305C	388	350	277	411	293	430	374	364
YJL057C	622	694	538	569	438	1164	638	571
YPR100W	1490.97	904.975	833	1142.88	957.872	1239.94	958.977	855.931
YDR358W	845	836	600	646	557	1596	573	585
YJL152W	9.003	3.002	8	8.008	3.003	12.004	8.004	5
YLR096W	1880	935	1335	1780	1220	1074	1382	1499
YDR194W-A	0	0	0	0	0	0	0	0
YKR052C	469	304	312	423	302	463	374	361
YLR427W	1498	831	925	1187	1046	1359	1196	1072
YDL152W	5	0	0	0	2.007	0	1.001	2
YGL015C	4	5	0	9	7	6	7	11
YEL064C	436	374	321	440	297	413	406	449
YMR127C	434	188	296	399	265	207	329	353
YIL140W	3038.93	1522	1940	2277	2049.9	2723.85	2537	2208
YOL163W	60	51	44	40	48	84	55	42
YLR197W	8408.99	4270.95	5934	7418.99	5182.97	3905	7076.97	5761.99
YBR213W	252	129	146	208	177	172	207	169
YAL064W	1	4	1	6	1	4	6	9
YJL204C	353	441	473	608	229	330	596	513
YLR244C	4729	2077	2867	3426	3217	3021	3421	3081
YJR084W	684	436	464	538	473	622	560	489
YLR233C	434	358	441	565	302	397	557	480
YDL238C	227	214	171	179	162	349	156	189
YGL084C	1144	954	959	1282	688	1021	1295	1142
YLR382C	1465	971	1010	1308	925	1307	1091	1162
YLR154C-H	4	0	10	5	15	14	0	6
YLR154C-G	276.323	56.145	92.636	143.616	180.413	296.353	150.794	152.002
YGR238C	734	445	541	703	486	589	640	629
YDR363W	637	413	479	564	422	550	583	503
YNL114C	12.037	13.035	11	7.019	14.037	7	14.02	11.017
YNL163C	2211	900	1426	1853	1418	1094	1561	1488
snR55	3	7	5	14	2	3	7	6
snR54	0	0	4	13	2	1	4	14
snR57	1	11	15	18	6	3	13	7
snR56	0	3	1	1	0	0	1	0
YHR009C	1738	1096	1212	1335	1296	1666	1455	1195
snR50	10	13	8	20	5	6	5	6
snR53	0	0	0	0	0	0	0	2
snR52	2	0	1	0	2	3	0	0
YFR050C	2958	1935	1983	2224	2124	2997	2235	2057
snR58	0	0	0	0	0	0	0	0
YLR331C	2	3	2	1.004	3.021	2.011	0	1.008
YNR069C	255	153	198	209	176	257	196	192
YOL058W	2367	790	899	1346	1756	2345	1366	1826
YAR019C	468	354	364	455	282	553	432	455
YOR024W	3	1	1	0	0	1	0	1
YML129C	725	485	437	625	494	857	455	450
YGL257C	1424	1180	1304	1591	848	1239	1606	1409
YGR020C	3608	1995	2052	2665	2415	3131	2470	2078
YOR093C	929	708	909	1137	561	625	967	1058
YAL046C	462	199	213	325	370	436	346	303
YOR392W	3	5	3	6	3	4	0	3
YAL039C	1281	664	629	1180	964	1148	764	844
YGR100W	1156	923	968	1085	785	1318	1049	1029
YLR403W	1668	878	1234	1566	1020	1154	1445	1270
YOL118C	10	8	13	11	8	14	7	9
YDR286C	213	123	133	176	145	200	178	144
YHR141C	15062.6	5979.43	5968.05	8343.18	9982.28	10413.7	7794.83	7029.11
YPL128C	997	519	547	787	624	598	700	674
YJL091C	693	688	747	871	491	710	1059	892
YBR191W	16349	6800.76	8460.51	11929.9	11838.1	11978.8	11028.5	9925.35
YDR380W	2505	1228	1680	1686	1902	1446	2552	2155
YGR191W	3511.99	1321.98	1831.99	2650	2444.98	2072	2352	2251
YGR047C	857	636	764	1053	628	650	821	748
YDR485C	1154	698	857	917	839	987	896	908
YPL239W	1396	705	975	1142	1048	775	971	920
YPR183W	3676	1735	2232	2823	2825	3508	2644	2400
YOR206W	3776	1798	3149	3957	2477	1222	3863	3397
YEL049W	5.815	0	11.798	13.093	9.378	18.928	1.067	7.237
YOR391C	9.588	9.601	6.535	15.733	26	18.403	20.558	6.516
YDR525W-A	235	175	197	224	121	213	250	206
YBR089W	1.001	4.012	6.024	4.019	4.011	8.027	4.01	6.031
YLR075W	44329	17594	21182	31440	30739.9	34106	27438	26652
YBR054W	151	93	222	89	109	174	168	133
YLR020C	1083	608	733	1014	749	699	932	842
YNL217W	1472	691	786	838	993	1127	1040	916
YLR404W	291	201	264	317	180	208	305	252
YLR154W-A	3.059	2.376	0	0	2.14	1	0	2.668
YIL013C	299	138	189	220	178	206	213	253
YPL206C	1227	869	811	1187	812	1296	983	919
YDL060W	3175	1026	1830	2465	2257	1084	2219	2193
YBR293W	813	589	687	919	545	683	758	752
YNR052C	1573.48	858.006	947.307	1200.32	1258.16	1247.97	1156.97	1115.82
YHR032W	1997	745	1087	1394	1487	1091	1334	1300
YEL032W	1934	946	1280	1652	1323	1237	1313	1405
YOL076W	614	551	651	807	393	313	925	762
YDR136C	0	2	0	2	5	4	6	2
YHR203C	20119.5	7918.19	10506.8	14649.6	15190.1	13003.5	13044.1	12597.4
YJL136W-A	2	0	0	0	0	1	0	1
YML112W	553	285	351	368	409	402	454	386
YLR154W-C	10.018	9.045	9.018	5.025	8.052	7.072	9.017	6.018
YGL241W	664	565	597	850	410	535	781	741
YDL071C	8	4	6	9	4	6	9	10
YPR176C	814	527	481	715	546	747	608	622
tS(UGA)Q2	0	0	0	0	0	0	0	0
YDR057W	780	521	652	700	522	620	746	606
YJL036W	978	870	678	890	662	1252	822	745
YDR521W	0	0	0	0	0	0	0	0
YER009W	4080	2762	3138	4380	2684	3448	3832	3565
YLR115W	1081	543	810	864	654	630	886	833
YLR140W	0	3.848	4.559	2.23	1.277	1.323	1	2.269
YGL114W	1700	832	1079	1365	1166	1300	1285	1278
YER167W	1176	694	870	1033	799	950	961	860
YMR104C	1323	1254	1141	1392	940	2359	976	1074
YER185W	69	88	97	117	48	102	85	84
YDL195W	5722	3809	4599	5398	4124	5379	4998	5058
YNL199C	1332	745	911	1086	1093	1003	1135	1120
YCR026C	1719	1001	1143	1541	1195	1340	1297	1357
YBL052C	1016	704.668	852	1108	655	569	945.895	900.979
YBR076W	8	2	5	6	7	19	9	13
YNL317W	579	346	356	496	461	622	476	413
YLL019C	2102.94	1502.79	1519.35	1945.5	1526.17	2126.09	1911.24	1832.82
YOR156C	422	284	348	404	315	415	381	328
YHR052W	2556	1008	1671	2323	1601	758	2120	1908
YKR026C	1223	625	745	903	841	686	999	816
YJR043C	615	372	450	566	475	452	500	555
YJR012C	325	201	194	233	210	320	230	224
YKL060C	92554	42743	54762	76566	67034	91831	60627	54561
YCR044C	1073	594	665	790	695	910	740	720
YKL035W	7065	5983	4855	5130	5188	13115	5725	5087
YLR264C-A	2	3	4	2	2	1	6	2
tQ(UUG)B	1	0	0	0	0	0	0	0.5
YNL073W	3465	2045	2199	3053	2278	3310	2269	2316
YMR280C	675	821	544	698	466	1014	715	713
tQ(UUG)L	0	0	0	0	0	0	0	0.5
tQ(UUG)Q	0	0	0	0	0	0	0	0
YFL020C	32	28	22	30	15	42	19	25
YNL328C	52	24	52	53	54	56	49	56
YJL014W	4870	2667	3226	3767	3407	3504	3619	3328
YMR031C	4273	3730	2936	3807	2897	6157	2808	2722
YOR174W	871	486	617	683	673	892	714	657
YPR149W	3661	2603	2427	2384	2478	4611	2423	2647
YNL015W	2745	1284	1422	1647	2030	3585	2138	1695
YCR084C	5386	2704	3492	4338	3849	3686	3712	3716
YHR178W	529	286	316	439	331	452	413	403
YHL050W-A	2.599	0	0	0	0	2.01	0	1.663
YDR260C	531	296	295	372	414	453	380	342
YLR283W	353	286	331	429	241	382	402	367
YPL170W	513	362	327	440	356	622	396	331
YPR001W	125	76	78	126	100	110	88	93
YDR204W	581	457	393	489	428	891	482	450
YBR085C-A	1461	1727	928	1094	975	3154	1003	1037
YDR251W	2541	2473	2329	2344	1688	3542	2590	2168
YNL048W	1270	873	938	1372	793	939	1199	1124
YML057C-A	2	1	0	1	3	3	1.01	2
YOR074C	1008	586	644	740	683.899	709.975	754	686
YPL028W	5623	3042	3161	4597	4364	6025	4309	3873
YJR152W	594	400	339	485	315	623	464	401
YKL025C	1156	974	1004	1257	774	1072	1126	1048
YAR008W	478	284	316	392	334	287	350	336
YOR003W	258	178	178	253	207	347	175	194
YOL097C	4230	2007	2554	3077	3162	2875	3167	2778
YOR110W	799	577	508	650	575	905	688	626
YDR407C	1193	1045	1208	1391	737	1025	1475	1321
YNR020C	553	371	358	512	440	391	410	367
YBR258C	154	127	101	158	103	142	136	111
YNL146W	12	31	24	42	6	17	23	24
YFR019W	965	763.138	975	1135	672	784	1149	1048
YLR262C-A	2845	1423	1120	1846	1683	2445	1435	1292
YIL115W-A	0	0	0	0	0	0	1.018	0
YBR223C	396	253	274	306	316	483	294	308
YNL241C	4189	2984	2768	3221	3063	5973	2683	2908
YJL154C	1613	1334	1546	1739	1153	1594	1856	1495
YDR091C	3879	1755	2701	3767	2401	1720	3454	3305
YJL123C	2755	1712	1758	2184	2090	2602	2161	2012
YHR066W	1658.33	417.092	799.48	1249.6	952.2	289	1178.09	1165.87
YPL047W	366	198	228	318	281	347	240	278
YER086W	6174	2507	3358	4566	4501	4162	4137	4252
YLR287C-A	10860.6	6437.39	6022.61	8109.4	7633.09	8402.7	7100.26	6905.46
RPR1	53	41	24	28	29	75	26	25
YBR176W	407	238	284	331	315	363	365	364
YDR207C	1037	696	679	932	763	954	717	742
YKL125W	811	396	551	791	564	487	650	626
YDR373W	839	597	586	794	598	769	811	628
YGL238W	1522	1662	2004	2541	968	1152	2368	2115
YLR190W	2384	1107	1667	1828	1697	1536	1914	1769
YNL128W	73	60	59	76	43	90	75	59
YLR312C	487	506	302	378	331	687	333	372
YKL191W	2272	717	1282	1610	1768	1059	1508	1506
YNR006W	1690	997	1066	1389	1067	1731	1230	1125
YHR120W	805	355	537	832	488	435	621	667
YAR050W	128.658	74.955	164.159	151.09	120.736	162.384	182.279	174.062
YOL137W	695	459	492	780	390	433	571	581
YDR530C	999	595	622	696	780	1236	785	828
YER111C	410	433	507	552	255	257	605	463
YER144C	1330	936	1028	1208	1104	1623	1282	1124
YOL039W	10674.6	4130.91	4975.22	7289.13	7563.17	7278.42	6162.11	5710.96
YIL083C	983	628	805	1056	674	905	1002	873
YHL011C	3872	1706	2289	3150	2667	2288	2960	2831
YFR010W-A	1.029	0	0	1.081	0	1.018	0	0
YGR184C	1642	1242	1663	1969	989	1274	1815	1739
YMR303C	420.103	257.313	250.54	568.757	316.579	520.879	339.436	417.293
YDR307W	679	642	683	947	379	604	757	812
YDR411C	1739	1063	980	1340	1217	2170	1309	1219
YBR205W	2027.15	1254.97	1445.5	1702.61	1414.8	1689.49	1658.11	1435.94
YOR321W	1039	685	827	952	781	1389	1008	847
YMR186W	29096	21895.7	28261.4	32566.1	17848	19825.4	21224.2	20528.3
YMR278W	885	470	624	664	633	865	677	710
YLR136C	517	538	459	989	292	681	479	648
YGL260W	0	0	0	0	0	0	0	0
YMR207C	807	609	704	870	558	614	761	813
YML015C	1028	463	620	743	690	639	698	645
YOR197W	3387	2061	2249	2820	2573	3280	2685	2549
YKR089C	2309	2103	1908	1922	1621	3147	1988	1811
YDL041W	1	0	4.063	2.027	0	1	1	5
YKR072C	1887.25	690.637	1163.55	1437.41	1337.61	1030.4	1287.32	1266.8
YDL014W	12263	4865	7068	9512	8856	6643	7787	7579
YML040W	0	0	0	0	0	0	0	0
YJL127W-A	2	0	0	1	1	0	0	1
YER079W	524	517	441	423	383	1167	439	394
YER024W	734	435	511	732	521	715	624	673
YOR230W	6348	3204	4075	4790	4397	6258	4210	4133
YGR234W	10537	4286	6485	8771	6929	6555	8325	8448
YMR178W	1009	768	677	931	629	1093	914	748
YPR037C	1149	626	691	960	894.997	1183.98	729.996	727.995
YEL068C	305	128	171	242	207	242	215	179
YNL090W	800	460	476.989	600	652.988	796.993	624.991	516.989
YOR307C	873	554	666	921	547	601	865	761
YMR225C	909	497	494	661	605	787	565	517
YBR095C	870	513	615	760	664	728	725	604
YDR036C	1389	794	930	1336	977	1174	1182	1068
YGR043C	270	303	253	266	245	586	373	322
YPL223C	45	42	69	65	44	84	40	60
YPL272C	251	228	219	333	199	254	342	358
YPR002C-A	54.282	61.231	78.761	113.908	20.57	31.398	76.449	96.496
YOL002C	1597	861	1212	1367	997	850	1675	1262
Q0032	0	0	0	0	0	0	0	0
YEL032C-A	0	0	0	0	0	0	0	1
YFL005W	2347	1532	1456	1904	1569	2156	1714	1586
YCR010C	24	25	11	28	12	44	16	22
YMR152W	1235	1018	1056	1210	802	1387	1100	1088
YDR154C	7193.56	3978.32	4546.02	5420.57	5665.07	7558.68	4404.03	4450.04
YMR125W	2257	1924	2284	3285	1279	1371	2756	2713
YJR031C	805	631	813	1009	559	445	1007	903
YCL026C-A	24	10	18	17	18	29	20	38
YCL026C-B	446	320	333	393	353	525	355	401
YGR118W	12585.2	4399.45	5689.74	7779.26	8777.51	8448.24	7054.03	6500.42
YJL055W	2528	1751	1628	1936	1879	2664	1859	1657
YPR102C	14379.6	5948.31	7255.13	9773.39	10565.9	10864.1	9165.56	7800.08
YNL334C	195.1	128.992	121.29	204.959	210.34	269.579	255.58	244.193
YGL123W	42539.9	18565.9	23356.9	31147.9	31334.8	31060.9	27969.9	26652.9
YPL064C	704	428	459	564	551	748	528	514
YPL086C	2105	885	1393	1736	1454	1057	1768	1587
Q0250	0	2	2	1	2	1	0	1
YPR153W	144	80	115	147	91	108	117	120
YMR042W	333	120	181	238	261	184	234	249
YLL003W	770	565	749	985	526	607	895	843
YER042W	437	374	367	410	274	488	381	338
YDR109C	804	425	490	663	513	580	603	594
YDR221W	1055	731	831	1066	647	869	903	910
YLR109W	6200	5011	4017	6078	4085	8334	3582	4410
YKR009C	379	280	238	300	305	479	340	357
YMR078C	972	561	723	809	686	573	862	802
YLR094C	1421	529	764	976	1070	926	998	918
YBR037C	643	444	398	608	434	778	457	462
YLR041W	24	16	13	22.409	11	25	21	23
YJR060W	1039	690	602	872	781	841	715	729
YNL161W	1707	886	1112	1489	1218	1300	1417	1299
YIL146C	500	298	381	476	356	452	399	390
YLR195C	1472	1051	1106	1500	1095	1208	1362	1188
YJL202C	1	3	1	0	1	1.007	1	0
YAL066W	0	1	0	0	0	0	0	0
YCR081C-A	0	0	0	0	0	0	0	0
YLR231C	734	592	770	830.981	756	1076	947.994	821
YKL016C	6499	2905	3719	4057	5549	6042	5907	5278
YPL111W	8534	4364	4005	6779	6127	5884	5238	5294
YKL174C	1290	919	1042	1356	849	1123	1350	1057
YKL121W	575	525	493	616	367	862	531	579
YLR380W	2123	1084	1246	1522	1660	1643	1537	1299
YOR142W-B	3318.71	2996.73	4164.39	4170.04	2224.45	2638.89	4333.11	3878.26
YMR012W	5729	3519	5070	6024	3855	3728	5914	5507
YER093C	713	590	747	854	438	555	799	732
YOR032W-A	6	6	5	8	4	11	7	7
YDL201W	1439	638	925	1102	1056	751	1030	955
YDR468C	912	539	566	662	618	754	644	565
snR73	3	3	6	3	0	0	4	0
snR72	1	2	2	5	4	1	4	5
snR71	1	4	0	3	0	1	2	1
snR70	35	13	27	33	14	24	20	24
snR77	0	7	6	6	2	1	7	11
snR76	45	25	32	38	26	26	29	31
snR75	0	3	3	6	2	5	3	3
snR74	1	1	1	2	0	0	4	4
YFR003C	572	556	352	471	404	944	391	366
snR79	1	0	5	5	0	0	2	1
snR78	0	1	0	0	1	2	0	0
YIL033C	3355	2297	2104	2473	2327	4619	2304	2049
YOR368W	322	286	288	342	218	244	329	316
YGR128C	1701	926	1619	2060	1105	539	2048	1710
YIL048W	1328	1146	1279	1488	746	1178	1505	1348
YIL142C-A	1.003	1	1.003	0	0	1.004	1.002	1.005
YLR337C	1869.99	1098.93	1204	1568.99	1351.98	1799.99	1247	1529.98
YOL056W	634	360	426	555	384	520	493	443
YFR052W	1843	1355	1466	1845	1196	1701	1774	1523
YGR088W	481	873	318	339	333	2216	336	359
[truncated: 4,845 more rows]

## Sheet: ripev.8h
	A_rip8h	B_rip8h	C_rip8h	D_rip8h	A_ev8h	B_ev8h	C_ev8h	D_ev8h
YAL008W	511	1012	948	852	736	904	980	1111
YBR255W	692	726	672	876	840	728	799	947
YGR164W	5	3	5	1	1	6	1	3
YGR131W	29	83	45	98	34	40	34	58
YNL003C	455	774	564	833	571	686	611	755
YBR135W	375	477	396	629	491	503	418	405
YBR160W	697	926	782	1073	863	872	726	923
YJL082W	887	1322	1385	1738	988	1212	1688	1362
YJL142C	252.192	346.282	383.202	371.227	228.607	414.699	609.422	470.28
YPL191C	225	345	299	370	298	246	360	414
YGL215W	2486	3120	2916	3560	2962	1948	3613	3698
YKL074C	683	772	557	835	720	514	560	667
YJL077C	24	13	11	14	14	17	12	18
YKL096W-A	64338	62857	57378	69932	82208	88786	60782	77503
YIL124W	2195	2398	2530	2706	2256	3406	2726	3253
YLR364C-A	0	0	1	0	0	0	0	1
YIL171W	0	0	0	0	1	1	0	0
YPL039W	365	524	302	444	456	377	368	379
YNL170W	15	33.112	26	54	27.16	10	37	35
YGL141W	790	929	966	1071	816	816	1123	1265
YJL179W	281	425	234	553	288	266	205	321
YDR316W-A	0	0	0	0	0	0	0	0
YDR316W-B	1862.64	1392.08	3250.09	0	262.382	1735.93	987.63	3227.85
YKL083W	3.005	9.033	10.025	2.003	11.066	4	8	2
YBR152W	234	273	175	313	265	247	163	320
YKL029C	3222	1413	1745.99	1945	2022	1428	2113	1746
YPL166W	226	323	309	285	306	340	394	460
YKL052C	595.958	578	651	682	737	715.948	652	655
YHR025W	3606	3166	3017	4029	3558	4102	3529	3960
YOL034W	595	590	516	847	635	436	475	672
YBL008W	545	521	393	732	552	403	398	624
YIL062C	1469	1997	1640	2255	1700	2684	1775	2195
YCL023C	0	0	0	0	0	0	0	6
tC(GCA)P1	0	0	0	0	0	0	0	1
YOL116W	413	595	548	644	545	603	559	679
YDR196C	689	1314	803	997	947	1155	952	1146
YNL255C	3014	3779	2286	3950	2898	2981	2344	2664
YNR032W	492	782	496	656	566	784	532	665
YNR045W	647	984	681	938	713	930	677	1063
YML105C	1223	1215	986	1404	1302	1312	1057	1206
YNL288W	684	789	600	900	757	845	682	798
YIL059C	202	194	195	198	218	308	256	301
YIL004C	425	550	360	640	527	502	393	490
YNR018W	2064	2386	1935	2714	2584	2600	1800	2049
YPL144W	279	288	227	394	282	350	219	366
YFR047C	1306	1554	1702	1688	1467	2294	1735	2015
YER087C-B	798	1274	780	1328	1016	1060	751	1039
YHR078W	725	1056	925	1236	968	852	1178	1247
YIR023C-A	0	0	2	2	2	0	3	0
YJR115W	85	157	172	125	136	122	193	185
YLR355C	17669	11516	6752	14215	14163	8743	10579	8780
YGR099W	589	582	675	829	778	624	752	773
YLR300W	14985	10163	8525	11831	19537	13564	12458	11501
YCL028W	1866	1998	1953	2400	2183	2667	1914	2619
YJR140C	502	761	689	880	579	472	738	853
YOR033C	610	655	515	775	679	450	609	578
YOR062C	179	196	106	131	190	210	172	190
YBR043C	9123	1541	3247	1788	5750	4511	5696	4785
YHR112C	1286	668	1101	777	4176	1178	4253	1245
YLR011W	180	253	232	291	262	337	257	319
YIL044C	683	905	658	983	741	853	731	804
YNL197C	1596	1652	1327	2151	1972	1592	1466	2088
YKR103W	203	284	295	391	260	146	426	342
YLR133W	1120	1494	1758	1855	1125	1570	1200	1977
YER121W	74	101	141	85	86	168	112	178
YCR046C	450	849	545	1022	474	872	353	644
YNL144C	1515	2816	1938	2632	1595	2816	2890	3248
YKL204W	1035	1141	1140	1472	1213	1260	1068	1535
YOR266W	390	570	389	725	377	427	343	521
YDR393W	406	473	411	597	430	399	367	522
YGL171W	885	795	543	1147	778	397	508	630
YPR194C	43027	10801	40197	9700	52270	34655	41472	49944
YGR019W	6746	1951	6265	1832	4250	9292	4722	7792
YBL033C	960	1199	943	1427	1002	1093	1104	1087
tE(UUC)G3	4	4	1	2	0	3	0.5	5
YJL188C	14.002	47.007	16.002	10.001	13.002	14.002	17.002	8.001
YLL057C	77	93	70	88	113	102	100	121
YPL060C-A	5.815	3.445	14.58	4.182	11.15	16.16	55.931	13.147
YBR296C	30	58	47	104	62	84	56	95
YNL277W	1066	82	81	53	6153.95	141	6011.96	114
YMR040W	113	380	136	213	122	237	141	200
YDR077W	54115	45629	62567	45055	67746	85964	57828	85814
YMR266W	4377	4635	3965	4161	5861	3311	5301	5079
YKR064W	580	851	752	1112	792	504	800	1051
YPL089C	852	1021	818	1018	934	1304	979	1359.3
YGR277C	510	578	467	742	578	639	491	528
YDL139C	135	137	117	160	155	186	129	153
YDR246W	434	786	590	789	543	697	590	714
YOR288C	556	1226	1034	1295	597	824	851	1078
YDL240C-A	0	0	0	0	0	0	0	0
YCR028C	600	779	453	1005	681	588	553	754
YML054C	683	814	893	630	818	1187	1059	1227
YLR179C	4126	2965	2523	3396	6734	3519	5843	2973
YOR141C	1076	1262	1054	1439	1198	1107	1071	1457
YPL280W	57.36	23.686	60.664	44.914	40.792	59.625	59.272	66.915
YBL106C	330	501	492	689	329	341	437	508
YGL044C	481	505	370	628	614	533	410	502
YER107C	622	736	604	1083	703	779	513	704
YBR038W	1298	1621	1752	2523	1509	1484	1573	2400
YER076W-A	1	3	5	5	1	0	3	12
YGR259C	15.069	11.017	10.017	14	9	16.062	5.018	22.054
YEL047C	1510	1514	1555	1714	1891	1877	2287	1902
YPR016C	2208	2214	1373	2624	2029	1761	1586	1804
YOR208W	413	719	485	868	480	512	564	774
YDL055C	28250	33505	24104	36340	31234	28162	29306	26382
YML009C	260	700	361	710	257	438	207	397
YML072C	3427	5300	4687	5644	4185	4474	6068	6046
YDR142C	564	567	527	695	597	637	554	667
YFL044C	751	933	976	1067	737	1144	834	1196
RDN37-2	0	7.272	0	0	0	7.571	0	0
YEL011W	4695	13241	10047	6734	4547	20480	13475	19292
YKL019W	1082	1438	1157	1560	1104	1588	1076	1391
YJL130C	6879	12124	8818	16231	5310	6288	7442	11410
YBL085W	1567	2224	1737	2605	1900	2006	1994	2325
YBR116C	9.393	25.953	37.427	12.631	13.656	36.51	30.801	26.751
YDR166C	922	1389	1059	1382	1126	796	1331	1613
YHR212W-A	0	0	0	1	1	1	1	0
YDR082W	525	563	460	619	532	467	460	742
YDR348C	1430	1568	1248	1755	1859	1641	1444	1648
YKL182W	15333	17523	19308	22751	12492	15097	15730	20238
YDR445C	0	2.028	0	0	0	1.015	1.01	0
YKL018C-A	297	366	221	360	339	367	260	362
YPL027W	0	7	3	5	2	4	1	1
YKL135C	1489.98	1804	1615	1972.87	1622.84	1330	1692	2108.86
YLR363C	218	352	234	346	255	214	244	362
YEL077W-A	4.098	13.994	2.794	0	7.944	7.085	4.538	6.82
YDR179C	136	306	219	287	288	64	286	242
YML089C	1	14	5	14	24	11	13	11
YLR431C	330	283	325	331	389	327	336	409
YKR046C	1625	1051	1424	1179	2244	2490	1915	1762
YJR005W	1252	1714	1372	2150	1383	1165	1449	1917
YJL116C	547	944	544	737	622	756	890	589
YMR030W	366	608	626	640	457	539	442	650
YER030W	878	1936	1047	1481	1173	1324	1030	1178
YIR026C	741	806	632	979	702	651	618	791
YJR072C	1511	1776	1289	2096	1504	1505	1405	1506
YDR515W	320	551	354	687	335	269	238	413
YKR039W	86731	13789	63758	17955	86592	65263	60852	69788
YGL003C	868	975	739	1079	995	954	850	978
YPL009C	1317.18	1859.24	1898	1943	1493.18	1232	1863	1733.53
YDR268W	290	481	299	573	253	400	208	429
YGL192W	3	6	2	3	6	6	5	5
YDL117W	945	729	682	1017	919	685	693	919
YMR131C	2391	2461	2111	3369	2641	1484	2327	2188
YMR293C	353	529	456	635	404	457	419	660
YJL214W	12	17	15	27	26	12	14	11
YIL105C	847	1392.38	1206	1563	1075	1102.68	1379	1581.19
YML126C	3090	2880	2797	4071	3477	3404	3111	3599
YLR189C	1549	1445	2091	1834	1870	1696	2674	2588
YIL150C	198	219	176	210	234	150	158	268
YLR349W	12	29.06	7	30.051	13.026	17.051	8.023	11
YGL250W	229	367	324	423	266	410	266	408
YBR212W	1717	2174	1947	2398	2222	2674	2221.32	3013
YJR109C	18198	4812	6652	4711	10727	9500	12984	12290
YLR254C	381	359	450	363	394	462	456	391
YGR085C	6265.6	7096.01	3798.26	9014.81	5015.31	4834.76	4745.94	4769.05
YPL105C	2449	2473	1958	3199	2689	2366	2181	2620
YGR145W	1322	1300	1020	1672	1251	604	1089	1180
YJR094C	96	231	188	265	158	130	184	284
YKL177W	8	17	13	19	9	15	14	11
YGL154C	200	292	290	285	269	302	336	360
tK(UUU)Q	0	0	0	0	0	0	0	0
YBR129C	634	1089	724	1215	864	799	806	968
tK(UUU)D	2	2	6	8	6	6	4	3
YMR322C	2.64	7.885	10.268	6.956	4.3	2.424	6.818	11.719
YKL099C	616	523	438	760	693	336	443	373
YDR315C	192	295	303	336	266	179	249	330
YLR394W	351	628	372	800	327	501	395	616
YNL104C	10532	5757	6087	6295.35	8120	9231.73	10739	9502.46
YNL151C	668	887	555	1059	728	507	565	624
YNR066C	156	123	131	155	147	121	174	211
YLR220W	1297	1721	1400	2123	1314	1654	1414	1780
YHR006W	1567	1204	1385	1595	1905	1478	1614	1612
YMR232W	34	85	45	88	47	51	64	64
YNL083W	610	700	529	776	603	715	487	800
YGR038C-A	0	0	0	0	0	0	0	0
YGR038C-B	228.423	1280.16	1550.3	1396.85	1429.08	900.155	2174.22	2053.05
YMR238W	2067	2061	1770	2527	2625	2400	2183	2425
YER168C	569	778	644	1042	715	621	674	702
YPL265W	19739	3565	17552	2817	24554	15888	10701	19292
YOR227W	1719	2244	2507	2738	2330	2200	3634	3533
YOR081C	1300	1504	1555	1779	1749	1438	1930	1866
YEL026W	2737	2554	1481	3838	1890	1652	1655	1923
YGR050C	94	109	86	103	132	92	103	88
YDR021W	272	232	198	313	273	104	221	201
YGL063W	261	402	221	388	283	310	205	310
YPL212C	2081	1224	835	1530	1865	883	1237	1152
YOL157C	51.289	125.743	94.182	177.096	87.97	125.713	103.942	122.734
YOR345C	0	3	2	0	1.031	0	6	1
YPR095C	1015	1349	1091	1439	1122	1071	1373	1435
YOR310C	4284.71	4437.23	2697.53	5968.87	3351.19	2330.48	2671.79	3061.86
YDR188W	3976	4336	3625	5599.99	4198	4496	3758	4061
YOL128C	677	206	464	245	740	599	457	446
YGL236C	406	630	312	828.984	349	506	144	515
YHR133C	852	1072	635	1287	857	816	749	860
YDR017C	1513	1535	1377	1765	1835	1379	1471	1862
YIL090W	1058	1339	836	1387	1228	777	1026	1106
YBR183W	243	649	612	541	304	664	609	607
YOL048C	589	1063	1096	987	768	1059	1177	1317
YML039W	20.118	20.967	56.184	24.201	0	0	0	21.969
YCR007C	138	201	204	225	182	197	233	270
YDR540C	51	152	113	101	74	99	85	124
YEL004W	222	478	324	565	259	214	377	412
YPR057W	820	699	655	867	911	796	732	791
YLL032C	374	599	552	724	524	329	532	792
YDR116C	605	1040	616	1251	558	832	442	795
YPL119C-A	30	72	77	94	68	17	88	108
YDR299W	778	578	317	877	753	272	336	352
YLR030W	32	31	57	35	60	66	67	95
YDR122W	1690	2241	1907	2370	1861	2326	2154	2647
YOL062C	1596	1700	1402	1969	1725	2082	1466	1845
YNL234W	187	179	153	172	293	157	341	243
YLR467W	2420.5	2449.32	2273.61	3585.43	3572.12	2462.11	3009.98	2689.99
YJL194W	195	233	103	339	199.995	140	122	188
YOL015W	165	242	263	272	235	209	301	300
YDL070W	4090	9723	4754	8688	5767	3989	7352	5927
YOR241W	935	986	789	1330	1043	1046	844	993
YLR056W	6451	5137	4527	8568	7859	5742	5565	5443
YPR039W	1.469	1.193	2	4.015	0	2	0	2
YMR054W	1316	2251	1655	2310	1607	1916	1770	2195
YKL110C	637	727	842	1149	689	554	944	803
YML100W-A	4	6	4	4	5	5	0	6
YPR070W	552	800	611	849	670	499	685	825
YLR204W	468	906	532	969	449	676	330	587
YML097C	599	667	563	869	680	541	606	672
YKR007W	536	702	587	951	696	715	538	697
YDL096C	2	0	4.074	2.01	1.013	1.011	0	7.057
YHR193C	6356	9012	5942	10180	6139	7408	5567	6534
YBL099W	9519	13748	11417	17698	12042	17285	13622	17815
YJR035W	481	592	509	609	557	550	640	799
YOR126C	311	352	299	385	355	383	270	359
YMR023C	271	390	312	446	270	307	266	362
YOR119C	1261	2018	1671	2124	1263	1204	1576	2217
YNL196C	3	10	4	6	4	9	3	8
YNL187W	215	261	265	299	304	302	235	332
YMR141C	5	3	4	1	1	1	1	3
YLL014W	619	1036	510	941	646	711	450	654
YBL062W	2	3	0	0	0	0	0	1
YCR061W	370	426	568	563	440	536	829	683
YOR199W	0	2	0	0	0	2	1	2
YPR115W	1745	2606	2513	2230	2202	2587	2972	3033
YHR088W	1010	986	828	1234	1235	526	874	868
YBR017C	971	1282	1003	1796	1060	859	1110	1433
YPR162C	410	519	486	697	470	393	507	636
YGR166W	432	567	348	649	461	338	418	533
YDL161W	1321	1535	1368	1647	1593	1462	1552	1744
YKL050C	267	279	219	316	314	210	345	322
YJR055W	90	90	69	130	109	60	78	89
YGL099W	1380	1361	927	1755	1242	836	991	1033
YFL030W	1007	1301	1269	1176	1675	2619	1509	2783
YIL119C	1506	2076	2084	1482	2009	1176	1626	2839
YPL193W	579	678	459	800	593	461	494	648
YNL005C	1206	1955	1377	2127	1180	1554	1089	1722
YGL217C	1.018	0	0	1	0	0	0	1
YJL144W	209	331	1013	339	241	326	1125	455
YBR012W-B	366.686	424.403	413.392	908.268	381.521	313.698	407.28	542.437
YLR379W	5.038	3.027	4.011	3.007	1.002	0	2.023	0
YJR139C	5313	4769	4711	5724	11330	5360	10950	5676
YBR133C	1006	1121	1171	1592	1238	934	1270	1238
YBR162C	16504	19899	13720	23463	17665	18365	17177	16988
YNL331C	238.993	310.358	175.7	276.19	232.359	288.372	219.97	337.792
YJL079C	16666	8816	10266	7643	19867	14282	16167	13191
YGL019W	1152	1326	1183	1615	1391	1581	1289	1460
YGR201C	266	396	355	371	316	473	366	499
YNL172W	544	758	717	899	650	587	698.963	962
YNL058C	443	614	600	787	485	746.823	556	906
YPL160W	4183	4300	3458	6315	3561	2710	4014	4319
YOL083C-A	0	0	0	0	0	0	0	0
YNL023C	867	867	779	1154	886	707	814	923
YDR214W	1668	2428	6821	4471	1641	2237	8150	3451
YLR222C	1409	1203	770	1507	1221	544	734	838
YLR295C	1374	2575	1750	2751	1949.52	2552	1819	2800
YER175W-A	5	11	11	5	6	2	15	20
YHR168W	331	395	258	509	365	373	246	406
YOR064C	346	491	340	545	452	415	384	475
YOR159C	334	525	297	506	462	426	344	389
YOL081W	853	2436	1942	1800	1173	1203	2691	2259
YOL036W	1796	1702	1653	2173	1951.98	1599.98	1688	1995
YGL148W	4867	4289	3102	5006	3993	4835	4017	4338
YOR031W	364	385	510	309	494	706	844	629
YBR282W	342	627	415	704	371	496	279	503
YDR194C	1859	3212	1632	3643	1594	1589	1220	2148
YOL114C	35	104	76	117	85	84	64	94
YGR084C	610	1033	526	1168	557	708	366	699
YNR030W	915	1281	920	1644	1023	920	927	1218
YAL037C-A	10	5	10	5	9	5	4	4
YML007C-A	5	8	6	9	7	6	12	5
YBR018C	56463	89519	79948	119842	52452	84417	79842	96525
YKL076C	121.804	129.602	125.765	173.001	143.391	107.306	101.99	124.179
YDR466W	1055	1170	976.777	1202.67	1173.66	1086	1063	1324
YFR045W	293	600	327	527	337	601	331	486
YIL002C	811	1002	951	1080	981	915	1013	1240
YGR159C	8199	6535.98	2916	6675	7213.99	3509	3296.99	3832
YLR369W	682	853	759	916	800	796	858	1010
YFR032C	16	12	21	27	12	7	22	11
YNL118C	2045	2490	2433	3012	2425	2028	2589	2905
YGL228W	2024	2782	2222	3365	2374	2712	2445	2939
YJR117W	1405	2811	2071	3894	1541	1700	2397	2155
YBR196C-A	5	19	6	19	11	15	9	11
YBR196C-B	8	17	7	10	13	7	14	8
YIL030W-A	44.679	59.295	45.293	70.359	65.899	52.089	51.404	73.985
YLR357W	1260	1388	1107	1880	1437	1249	1107	1355
YER127W	411	291	177	581	356	217	225	217
YBL015W	1393	2593	1879	2296	2506	4030	2826	4289
YLR017W	1008	1047	833	1373	1105	784	947	921
YHR110W	1144	1241	1043	1287	1377	1482	1149	1360
YBR041W	1239	1800	1218	2137	1532	1477	1677	1742
YOR394W	13	25	11.989	24.581	22.411	11	28.44	25.644
YCL068C	0	0	0	0	0	0	0	0
YDL220C	311	312	344.841	458	425.947	312.698	363.929	439
YDL039C	161	205	155	385	321	185	227	289
YKL202W	16.052	34	15.07	26	97.084	20	73	12
YGR122C-A	3.398	34.685	12.762	29.902	14.898	14.377	19.155	39.439
YOR264W	1216.99	907	984.997	1123	1278	893.996	1077	1107
YNL042W-B	2	1	1.036	3	1	1	4	3
YBL029C-A	402	739	820	587	520	785	943	851
YOR008W-B	6	8	6	23	11	9	11	17
YOR366W	19	30	41	50	29	23	51	43
YNL275W	335	447	208	566	314	311	208	328
YAR015W	8494	3576	5900	2884	6606	8669	5690	8097
YOR384W	17	45	25	92	22	24	18	24
YLL051C	1093	975	986	1267	1324	917	1232	1272
YDR427W	1436	2699	2195	2913	2094	1190	2195	2649
YLR079W	2360	1732	1893	1769	2741	2059	2392	2011
YLR408C	72	175	107	156	83	93	82	130
YMR093W	820	541	309	1015	717	346	347	400
YBR221W-A	0	0	0	0	0	0	0	0
YDR079W	215	577	367	490	251	359	336	451
YMR268C	287	274	220	369	330	164	296	292
YOR169C	1	1.002	2.004	1.002	2	1.002	4	0
YML070W	2161	3097	2990	3117	2813	3617	3584	3620
YHR175W-A	91	102	138	167	179	76	146	160
YPR072W	1348	2013	1794	2236	1797	1610	1913	2210
YMR108W	7116	5473	6197	7083	5952	5924	7201	7429
YCR091W	570	1249	1013	964	681	1550	1264	1634
YER062C	575	921	507	1295	794	809	852	649
YDR244W	656	835	504	984	806	650	472	769
YER189W	114.18	132.185	92.654	177.545	144.968	114.973	110.761	165.753
YJL009W	1	1	2	0	2	0	1.003	0
YDL137W	4928.35	6488.98	4864.51	7139.34	5924.53	7109.54	5222	6290.53
YGR271W	660	1068	961	1264	755	751	1005	1212
YDR233C	6939	7722	5224	8903	7073	6351	6303	6821
YGR071C	656	841	667	1051	882	442	929	1129
YCR106W	336	377	347	427	362	339	422	505
YBL100C	1	6.015	6.008	1.001	6.033	0	4	7.021
YER109C	836	968	765	1103	913	841	717	984
YDR489W	226	230	148	341	307	187	201	242
YPR049C	578	566	683	749	626	400	835	846
YDL057W	279	313	400	318	387	381	361	474
YPR014C	0	1	0	0	0	0	0	0
YGR257C	657	872	577	1073	599	805	495	726
YEL045C	5	7	7	10	9	7	5	11
YPL235W	1568	1945	1475	2371	1751	1573	1523	1895
YLR122C	21.141	30.05	13.385	23.519	19.993	43.556	23.822	27.634
YLR155C	23006	7375	15976	7534	29711	25173	20492	18101
YBL087C	3285.52	4726.37	2361.32	5745.6	2642.64	3711.07	2147.14	3044.79
YJL132W	304	368	357	499	381	457	514	545
YGL190C	978	1535	1291	1612	1348	1015	1479	1658
YBR110W	966	1484	1082	1609	1192	1089	1185	1536
YDR144C	355	720	330	1232	373	425	321	468
YFL046W	553	751	552	780	657	744	696	719
YOR103C	451.995	1015	558	816.992	669.949	324	668.997	758
YKL137W	390	936	520	771	354	611	349	578
YDR447C	4218.13	6323.77	2539.35	7125.83	3016.06	3703.84	2615.23	3317.15
YGL009C	3862	5501	4006	7453	2996	3931	3970	5257
YNL324W	0	3	0	0	0	1	0	0
YPR145W	18819.1	12201	8692.73	13500.4	13796.6	16123.7	6823.09	15245.7
YJL063C	681	1462	856	1647	765	1229	532	1097
YMR149W	1738	2781	1787	3134	1881	2577	1760	2369
YPL021W	0	0	0	0	0	0	0	0
YIR010W	866	785	851	1113	1117	823	936	996
YDR331W	626	856	541	1055	616	627	688	721
YJL114W	2.485	10.004	25.028	4.603	4.489	4.43	18.289	28.858
YKR044W	634	421	369	450	759	522	488	513
YLR433C	610	931	781	1074	705	639	881	890
YMR068W	116	157	148	225	153	174	134	171
YLR157C-B	0	0	15.499	0	38.455	22.695	40.235	42.622
YNL164C	283	263	167	366	336	211	176	208
YER032W	799	739	900	1196	1061	761	937	1037
YJR070C	2376	2566	1545	3401	2219	1752	1478	1694
YGL005C	886	1365	825	1202	931	1123	981	1112
YHR043C	758.152	2861.65	1422.97	2975.94	763.026	1989.24	951.925	1792.24
YDL111C	625	634	635	983	687	538	648	612
YMR133W	0	5	8	8	2	20	6	17
YPL007C	497	617	597	811	705	425	663	754
YKL159C	229	315	271	294	251	253	251	347
YDR507C	2149	2034	1538	2468	2497	1315	1785	1721
YKR075W-A	2	0	3	0	2	1	1	0
YLR138W	2305	2216	2037	2675	2564	2478	2365	2624
YBR101C	1393	1695	5548	2830	1093	893	6513	1716
YLR396C	492	589	474	741	490	457	495	596
YBR245C	1300	1383	1296	1735	1481	1141	1321	1758
YJL216C	103	120	84	158	108	130	132	123
YBR210W	335	594	340	676	490	362	440	473
YPL103C	433	694	497	753	432	572	374	714
YIL103W	541	432	298	663	481	247	290	319
YIL152W	386	423	376	458	478	577	448	555
YML045W-A	0	0	0	0	0	0	0	0
YJR096W	860	934	1296	581	939	1788	1528	1551
YAL010C	339	533	424	581	434	390	446	631
YGR143W	2259	2764	2214	1988	2235	2981	3091	3256
YGR112W	420	758	578	717	411	759	530	748
YLR256W	4084	6431	6549	6696	5465	3442	8023.19	6989
YHR174W	69655.1	57918.9	64216.5	73755.9	58771.3	77608.7	75786.8	63314.6
YOR012W	51.562	48.017	72.77	68.745	60.745	67.219	84.705	79.038
YIR001C	688	818	720	858	853	919	818	1113
YDL213C	1011	1330	898	1312	999	895	820	864
YDR442W	0	1	1	0	0	1.027	0	1
YDR317W	21	59	46	67	28	33	31	69
YDR478W	136	172	143	187	157	125	156	155
YKL097C	1	1	0	1	1	3	3	0
YOL164W-A	0	0	1	1	0	0	0	1
YNL106C	332	546	392	677	321	477	357	573
YOR378W	11	21	14	19.053	13	11	10	25
YFR015C	1671	10414	6205	8924	1651	11145	7136	11232
YMR230W	3666.69	6296	2799.39	6364.82	3231.39	3660.67	2805.5	3459.44
YIL092W	432	335	294	420	440	284	403	350
YAR009C	9638.34	16900.5	17735.3	14532.3	10988.2	8052.95	24218.3	13308.3
YLR321C	751	845	618	996	890	802	646	838
YBR004C	413	789	569	900	664	296	697	757
YGR052W	332	422	942	424	541	389	1544	927
YJR161C	409.118	523.001	491.88	491.787	474.044	707.801	777.022	742.391
YOR278W	370	503	389	603	386	435	384	514
YNL085W	1643	2814	2320	3464	1879	1469	2584	2926
YGL061C	359	430	313	473	492	230	358	393
YPL210C	1566	2204	1847	2835	1787	1409	1718	2241
tS(AGA)G	0	0	0	1	1	0	0	0
YOR087W	1087	1351	1226	1622	1187	1339	1205	1546
YGL234W	11814	4853	8043	5953	8187	10442	8028	10667
YOR347C	528	1264	1178	1128	552	1429	744	1615
YPR093C	196	255	257	275	243	351	272	365
YAL029C	1354	1932	1588	2313	1559	1082	1497	1871
YOL155C	1894.36	411.823	1586.74	481.572	3981.93	2481.95	4909.71	4568.69
YDR421W	582	661	751	759	681	737	845	1016
YGR186W	1858	2390	1969	2851	2353	2320	2350	2662
YDR294C	1576	2155	2024	2294	1874	2352	2395	2539
YHR135C	2150	2707	2329	3470	2862	2970	2406	3239
YDR015C	0	0	0	0	0	0	0	0
YBR181C	9054.08	10255.2	6099.24	13802.3	7727.32	8595.28	6471.27	7722.69
YOR078W	766	702	481	953	788	403	540	526
YOR243C	1864	2285	1208	2415	1653	1161	1381	1551
YMR165C	737	923	1003	1010	909	1023	1052	1261
YCR005C	3351	2847	2966	1842	5643	7438	3369	6765
YLR163W-A	0	0	0	0	0	0	0	0
YPR055W	601	885	735	1079	773	484	822	1075
YIL016W	617	782	504	853	716	704	501	633
YLR032W	618	515	481	759	661	431	530	679
YDR114C	4	0	1	2	9	3	0	2
YLL030C	0	0	0	0	0	0	0	0
YDL185C-A	1	2	2	0	0	0	1	0
YLL065W	0	0	0	0	2.293	0	0	0
YPR046W	191	194	129	242	214	200	132	194
YBR099C	34	53	163	119	37	9	291	52
YBL027W	11191	14221.5	8594.48	17117.4	9868.41	11756.8	8668.63	10356.8
YOL060C	1370	1931	2170	2505	1545	2253	1986	2575
YIR018C-A	1	2	1	5	1	2	2	2
YOR382W	215	270	279	350	330	286	345	231
YNL232W	633	593	593	872	690	541	566	601
YDL076C	556	825	610	801	688	810	737	807
YOR225W	0	2	0	2	0	1.006	1	0
YDR120C	1558	1451	1044	1893	1493	969	1212	1187
YLR465C	20	41.593	41.951	58	36	29	44.374	42
YJL192C	981	1840	1229	1942	1141	1382	1146	1522
YEL020C-B	3.021	4.029	0	1	1	0	1	1.004
YLR054C	76	93	101	62	71	99	131	110
YLR009W	1726	1377	876	1723	1598	760	1130	1065
YKL116C	738	733	601	829	820	731	658	741
YBR209W	0	0	0	0	0	0	0	0
YOR292C	303	536	491	548	385	561	611	650
YLR423C	272	511	403	478	371	402	406	511
YDR278C	0	0	0	0	1	0	1	1
YLR105C	520	757	476	747	570	638	566	674
YML091C	1004	2674	1754	4319	1456	994	1924	2648
YHR191C	126	181	183	210	185	212	144	200
YDL098C	160	231	179	281	207	165	204	200
YLR202C	54.386	56.308	40.451	111.673	29	66.591	43.42	61.521
YLR299C-A	0	1	0	0	0	0	0	0
YKR005C	103	146	138	216	112	104	105	148
YMR143W	6002.63	8767.71	4471.91	9474.01	4895.96	6506.65	4514.99	5354.57
YCR063W	105	80	52.786	104	97.754	67	62	117
YNL189W	3019	3381	3306	4575	3402	3136	3561	4172
YFR024C-A	1596	2074	1919	2272	1844	2749	1795	2408
YCL047C	238	385	360	466	251	344	303	401
YGL122C	2090	1676	1612	1973	2387	2203	1713	2169
YDL018C	332	542	442	558	435	442	389	495
YOR120W	13706	27596.7	23153.8	24681.9	12789.8	31999.9	19639.7	33116.8
YPR160W	3837.99	12511	11518	3933.97	4093	17811.9	16251	16961
YBL060W	396	542	353	551	495	353	372	483
YDR065W	172	246	180	265	216	142	189	252
YBR019C	99683	159777	133224	198537	104407	141030	145660	162974
YKL056C	11832	17261	8356	16725	9979	11892	8707	9353
YKL065W-A	15	44	42	43	31	39	53	53
YGR160W	6.004	25.015	5.003	3.004	7.005	2.002	7.008	3.002
YDL163W	0	0	0	0	0	0	0	0
YPL068C	238	216	249	408	233	210	352	267
YJR057W	419	508	381	625	531	391	372	444
YGL211W	742	764	713	1050	854	743	756	813
YFL032W	4	18	6	22	7	9	5	8
YPL195W	1346	1733	1475	2071	1578	1130	1790	1976
YCL044C	539	675	671	1014	682	728	559	726
YAL059W	436	464	192	524.995	392	230	212	248
YNL007C	4742	7018	15108	9652	4238	5995	19322	7947
YPL148C	98	174	108	228	140	137	105	194
YJR137C	5990	966	928	1529	27226	995	28951	1343
YMR021C	510	495	573	629	593	524	599	618
YMR074C	653	995	598	1101	754	925	671	869
YGR203W	270	281	262	315	322	362	254	305
YJR039W	329	576	695	716	454	564	731	930
YDL158C	26	135	83	130.806	68	24	89	93
YOR104W	347.273	407.785	345.944	485.743	430.249	516.716	373.877	484.325
YFL009W	1154.2	1329.78	1143.47	1433.24	1426.05	1316.05	1314.87	1489.26
YLR297W	181	197	301	198	219	157	487	303
YLR279W	0	7	3	0	0	3	0	1
YDR216W	769	5276	2569	5051	863	2691	2600	4342
YIL120W	235	370	336	457	245	314	301	407
YBR030W	709	693	564	964	697	563	457	624
YPL162C	347	491	350	530	352	435	400	547
YGR095C	588	526	425	722	568	440	500	474
YCL027W	144	511	234	358	165	312	137	219
snR3	1	3	0	1	0	1	0	0
snR5	10	36	7	18	17	6	12	11
snR4	33	39	33	74	42	33	33	31
snR6	1	0	1	0	0	2	0	0
snR9	17	21	13	26	15	20	10	20
snR8	3	10	2	12	4	8	2	9
YHR029C	4207	861	1764	882	3097	2261	3422	2309
YIR021W-A	1	3	0	2	0	0	2	2
YAL033W	437	606	340	499	571	482	435	379
YNL130C	1649	2134	2161	3415	1823	1737	1758	2331
YNR036C	1032	1785	1215	1818	1058	2000	854	1398
YNR049C	568	615	420	521	531	541	561	491
YDR192C	358	342	277.966	533	468	398	299	401
YOL112W	1032	1224	997	1374	1260	1281	1083	1304
YML109W	607	501	475	719	720	386	457	564
YOL083W	531	614	725	522	643	809	769	1007
YNL251C	1056	1020	1287	2536	1791	1190	1959	1270
YBR266C	1	3	0	0	0	0	0	0
YBL004W	1535	2123	1630	2433	1457	706	2141	1822
YER145C-A	0	2	0	7.001	3.001	5.001	1	3
YBR164C	746	1254	760	1378	862	962	696	1116
YHR074W	2117	2187	2324	2883	2340	2701	2526	3187
YDR464W	1005	926	937	1239	1265	797	1073.53	1158
YFR030W	4787	937	1007	1430	26207	986	29153	1342
YJL146W	576	620	585	730	658	614	549	739
YKL078W	408	260	163	337	318	130	171	211
YIL055C	197	254	369	433	312	292	419	360
YPL053C	1438	2119	1676	2648	1629	1709	1565	2005
YLR351C	1921	1843	2069	2056	2110	2798	2212	2578
YEL009C-A	5	5	1	7	3	4	8	18
YJR111C	780	367	298	424	637	440	622	428
YIL030C	1950	2407	1722	2802	2107	1321	1832	2283
YER125W	2091	3248	2531	3897	2268	2546	3144	3625
YER152C	1563	1377.99	1490	1616	1815	2019	1600	1660
YLR015W	330	401	348	507	412	338	342	427
YHR116W	87	260	130	281	85	181	51	162
YPL259C	808	1180	921	1441	865	806	977	1129
YOL100W	933	1384.64	1283	1563.95	1050.83	1054.98	1501	1590.9
YOR039W	1130	1285	1147	1610	1329	1180	1225	1417
YDL037C	42	68	53	131	100	45	95	105
YLR334C	0	0	1	2	1	0	0	1
YHL043W	1	3	5	3	3	2	1	4
YOR364W	7	16	14	22	6	4	9	9
YOR386W	614	875	1002	714	665	1057	1067	1404
YAR042W	1095	1456	1532	1768	1278	1500	1685	2022
YPR198W	937.997	1304	1093.97	1613.98	1454	934	1266	1303
YHL038C	418	515	327	604	552	358	472	469
YLL053C	94	70	73	102	218.669	84	209.153	127
YDR425W	595	736	704	811	807	638	765	980.992
YOR331C	1.001	27.025	16.022	5.004	10.018	10.015	21.013	5.008
YML076C	857	788	850	947	980	699	1027	993
YKR060W	453	320	313	423	507	248	358	323
YHR094C	4.092	5.153	11.314	3.068	4.099	7.374	5.108	4.106
YER069W	19314	1117	1808.98	1152	16282	2971.99	19047	3283
YMR091C	1124	1320	1104	1630	1404	1242	1386	1315
YER012W	2064	3338	2540	2802	2456	2752	2542	2897
YHR098C	1772	2837	2362	3452	2058	1979	2703	3112
YDL135C	828	1437	1095	1491	1099	1188	1063	1318
YCR093W	1884	2462	2477	2900	2057	1385	2811	3059
tP(UGG)O3	0	0	0	0	0	0	0	0
YGR273C	0	2	1	0	1	1	0	2
YGL080W	522	803	485	707	597	489	464	663
YBR069C	1429	3244	1245	3894	558	1761	463	1954
YGR077C	524	933	790	1017	768	807	899	1058
YCR104W	3	3	7.011	3.766	1.232	5	4.406	2.356
YDR040C	1596.38	1699.82	1934.69	3944.32	2242.61	2182.08	1373.01	2627.83
YPR012W	7	15	5	10	10	5	11	8
YGR255C	1104	1811	1499	1874	1345	1783	1525	1804
tM(CAU)M	0	0	0	0	2	0	0	0
YDL051W	1738	2107	1392	2607	1703.98	1373	1446.97	1584
YBL102W	880	1217	930	1155	895	1171	910	1131
tM(CAU)P	3	3	0	3	3	2	1	8
YPL237W	3199.99	4364.97	2719.98	5039.98	3065.98	3114.99	2569.96	3330.96
YLR120C	1815	3116	1620	2658	2276	3079	2020	2422
YCL001W-B	10	11	8	8	13	6	7	9
YCL001W-A	10	14	10	10	8	9	13	13
YNL068C	747	626	756	786	867	685	842	833
YJL169W	0	1	1	0	2	0	0	2.025
YBL002W	6988.3	6625.71	6391.74	9161.41	9418	5429.31	8742	6515.35
YDR146C	1224	1506	1778	1998	1473	1377	1774	2120
YBR112C	2334.54	2335.38	2420.76	3366.29	2847.91	2550.22	2925.17	3277.84
YBL081W	538	391.734	148.031	528.13	513.017	266.326	216.072	294.362
YFL040W	6	9	4	4	8	7	6	9
YNL326C	444	545	341	611	474	439	450	498
YDR337W	656	1064	810	1144	679	839	549	844
YJL061W	856	1104	898	1323	828	660	860	1166
YPR147C	627	1002	749	957	711	906	783	989
YKL131W	0	4	0	2	2	0	1	6
YDR441C	444	440	273	598	484	386	344	392
YPL094C	1839	2806	1800	3031	2064	2423	1845	2321
YOR101W	2349	2041	1391	2677	2355	1348	1736	1730
YER020W	1724	1856	1888	1705	2511	2723	2590	2402
YDR231C	406	702	505	722	543	865.991	497	748
YJL112W	1055	1382	1060	1653	1304	1255	1082	1477
YFL066C	387.721	351.799	413.1	408.857	447.111	554.415	679.255	859.357
YNL193W	359	772	586	873	538	594	679	765
YML058W	1910	1971	1831	3100	2506	2399	1843	2235
YBR188C	224	323	228	315	247	305	226	302
YLR435W	536	530	363	705	472	315	363	356
YJR076C	1620	2331	1778	2666	2031	2023	1870	2049
YKL157W	5226	4704	5930	5065	5567	6071	6939	7498
YBR003W	838	1449	1039	1415	921	1510	1025	1486
YPR129W	1441.98	1931.93	1415.96	2446.98	1590	1799.97	1375.88	1826.95
YDL113C	960	1276	1283	1386	1180	1132	1510	1537
YMR135C	1399	1760	1834	1619	1756	1947	1781	2269
YGL007W	0	1	0	1	2	1	2	5
YPL005W	282	361	330	451	357	297	367	395
YBR247C	859	734	571	1093	875	443	608	593
YLR185W	3592.66	4213.95	2510.19	5544.33	2700.81	3701.5	2581.2	3003.79
YJL210W	899	934	875	817	775	1396	773	1042
YLR398C	1107	1506	1316	1822	1160	1135	1134	1710
YIL154C	898	1079	1114	979	1210	1537	1131	1337
YIL101C	1121	1591	2040	1343	1844	2676	2340	2785
tT(CGU)K	0	0	0	0	0	0	0	0
YKL004W	1556	1754	1108	2372	1840	1136	1398	1657
YPL154C	8447	9471	10255	9146	11077	12849	12919	11213
YPL101W	963	977	962	1307	1136	939	967	1056
YLR258W	4275	9750	9494	5738	4170	11390	12719	14431
YBR178W	0	6	3	2	2	2	1	8
YJR098C	207	242	249	321	247	278	216	328
YHR176W	502	261	306	343	3342	409	2778	359
YJR018W	5.015	7	5.01	7.012	7.053	6	3.013	4.014
YMR326C	2	1	2	3	2	2	5	0
YDL244W	23.629	43.162	40.222	54.627	30.218	69.41	30.577	96.164
YDR319C	478	820	744	913	706	539	799	1058
YKL095W	350	450	349	419	357	411	289	395
YOL099C	4	12.36	4	8.053	9.173	2.016	8	8.103
YIL094C	26601	2772	2752	3915	19510	3885	21669	4078
YLR451W	1059	1025	861	1232	1129	732	1195	1034
YFR017C	747	1790	1700	1314	941	2602	2295	2335
YLR342W-A	9	20	23	32	23	4	39	28
YIL076W	1533	2322	1841	2607	1738	2044	1804	2343
YNR077C	1.373	1	0	4.647	5.707	3.106	2	4.259
YOL044W	610	435	511	512	673	417	665	677
YLR323C	195	194	158	245	246	197	175	189
YOR085W	1532	2358	1511	2540	1795	1956	1803	2002
YGR054W	2043	1988	1598	3055	2254	1716	1427	1952
YOR050C	2	2	2	3	4	1	7	3
YNL087W	2939	3488	2467	3499	3591	2116	3664	3127
YGR114C	1.362	0	0	0	0	0	0	1.001
YLR318W	188	306	225	395	254	148	254	315
YBR278W	381	384	347	428.998	415	456	379	406.993
YNL024C-A	455	632	366	543	485	445	388	525
YDR296W	707	1287	908	1502	689	1173	603	938
YGL232W	667	1144	873	1248	819	708	895	1070
YPR091C	1232	2391	1698	2429	1476	1867	2108	2390.99
YGR141W	579	805	823	894	776	877	854	934
YAR030C	9	26	10	21	13	13	11	13
YGL111W	1075	1302	949	1624	1086	680	1110	1202
YJR158W	0	0	0	0	0	0	0	0
YHR137W	2538	1039	2904	2156	3231	2564	3528	3094
YFL011W	3	39	21	47	9	23	14	19
YMR198W	397	523	437	735	559	456	412	564
YCR003W	365	921	327	828	400	577	207	471
YMR316C-B	80	115	107	85	93	141	100	132
YMR316C-A	3	8.068	9.224	8	7	5	21.185	6.063
YDR342C	13654.2	14406.1	9622.53	14979.1	13309.3	18314	28705.3	22654.5
YMR163C	403	643	589	747	578	400	620	752
YGR294W	13.067	13.76	8.433	19.324	19.678	18.392	19.617	7.145
YEL008W	3	3	2	8	2	5	2	6
YLL067C	22.756	0	144.461	113.367	163.555	182.932	72.606	21.23
YHR086W-A	0	0	0	1	0	0	1	0
YBR020W	107285	156309	146278	203388	119006	163622	142684	182957
YLR418C	862	962	869	1164	896	969	963	1021
YDR112W	1	0	0	2	0	1.01	0	1
YER059W	923	982	1019	1079	1109	1149	1169	1223
YNL076W	919	945	810	1112	949	993	881	1047
YBL025W	196	194	140	206	231	214	162	211
YOL066C	526	540	549	958	605	539	534	634
YDR126W	154	260	195	335	193	208	207	237
YPL216W	354	448	488	578	490	359	573	546
YOR223W	277	443	369	452	351	426	405	469
YEL022W	880	1290	1011	1791	1036	587	1016	1222
YHR072W	1970	2099	1665	2521	2034.9	1983	1808	2204
YOL019W	5413	3226	2847	2934	6649	4139	2562	3729
YLR463C	67.832	104.208	75.916	164.645	86.212	105.265	80.313	121.49
YJL190C	5529	7434	3044	9009	3769.65	5020	2760	4211
YMR218C	550	858	645	969	623	510	654	790
YNL265C	956.992	1106.9	1093.99	1041.99	1009.98	1325.99	1036.96	1296
YNL230C	285	337	273	404	337	279	289	423
YLL049W	232	410	310	415	314	277	298	355
YHR211W	572.447	593.658	558.31	1007.99	705.805	569.373	832.11	681.335
YPR166C	519	800	496	811	424	531	322	629
YJL042W	2121	2639	3046	2829	2755	2814	4222	3988
YNL301C	1074.15	1402.7	859.498	2272.77	878.239	1080.92	832.655	1110.15
YDR333C	938	1103	808	1471	1069	836	849	1160
YMR058W	18593	10562	15272	13358	22524	17310	16954	17403
YDR061W	671	1007	842	1155	917	976	859	1114
YJR112W-A	255	517	305	472	301	442	301	421
YOR290C	1824	2371	2581	2827	2214	1940	2760	2948
YKL114C	938	1021	933	1237	1033	925	909	1079
YML024W	7425.87	10796.2	5526.65	13101.2	5532.94	8183.16	5364.77	7262.85
YML093W	1863	1423	1107	1895	1769	830	1244	1232
YHR197W	799	705	632	1076	775	255	589	578
YDR276C	2634	2428	2276	2173	2747	3081	2856	3096
YLR200W	417	647	407	610	460	427	372	481
YKR003W	559	839	677	1119	652	739	737	839
YLR107W	681	754	636	743	794	686	745	897
YMR321C	3.758	2.039	0	4.742	0	25.365	0	2.602
YER175C	2539	1111	1711	710	2084	2631	2845	2995
YIR012W	1437	1226	1012	1802	1407	890	1115	967
YDL183C	557	272	221	294	421	207	341	341
YPL278C	119.26	143.317	113.056	186.236	154.489	161.598	176.235	174.677
YMR105W-A	0	0	0	0	0	2	1	0
YMR118C	11	5	10	7	29	17	38	21
YCL049C	606	1112	694	1175	719	1146	815	983
YBL066C	673.966	1101	778	1277	897	938	782	1305
YGL120C	2492	2334	1956	3312	2405	1362	1957	1906
YGR271C-A	464	577	297	575	517	197	308	225
YDR169C	1230	1278	1250	1501	1410	1449	1275	1564
YOR057W	599	788	732	1002	740	708	894	906
YLR410W-A	0	193.601	207.323	0	0	0	79.767	0
YLR169W	1	3	3	0	1	1	1	0
YMR272C	3431	4368	3336	4864	4060	4283	3861	3923
YPR108W	1889	2636	2271	2993	2217	2315	1916	2654
YKL054C	2974	3507	3566	4729	3565	2960	4118	3879
YGR162W	4367	3922	2680	5119	4236	2423	2842	3399
YDL165W	620	666	625	745	721	790	632	658
YDR520C	358	584	422	704	478	351	354	612
YKL023W	555	582	605	562	669	752	614	820
YJR051W	1098	1554	1264	1638	1312	1680	1372	1703
YNL009W	175	306	198	282	210	299	251	337
YFL034W	798	913	813	1226	980	946	847	1177
YKL164C	11580.3	5514.98	8087.36	7606.07	11680.8	10585.1	9119.2	9961.61
YJR135C	136	204	167	208	143	151	131	191
YGL213C	971	1047	850.977	1196.99	1160	967.998	950	1087.99
YOR161W-A	0	0	1	0	0	0	0	2
YMR076C	964	812	1095	1289	1228	417	1248	1045
YOR161W-B	9.43	23	7.286	18	14.499	19	7.232	15.883
YJR037W	0	0	0	0	0	0	0	0
YNL027W	937.657	1190	1178	1377	1145	904	1181	1284
YLR291C	714	862	824	1215	750	658	833	911
YDR210W	248	364	250.998	482	299	324	239	327
YIL122W	259	485	281	525	352	389	328	407
YDL230W	286	428	363	536	374	501	343	487
YJR113C	756.997	1108.99	913	1424	820.993	1266	656	1050
YGL075C	222	198	224	239	273	185	182	231
YHR041C	452	629	433	698	584	607	453	490
YIL156W-B	375	677	400	600	462	686	350	508
YIL156W-A	1.001	6	1	3.003	8	3	4	3
YLR416C	6.396	1.038	5	4	7.651	3.054	6	5
YGR097W	1357	1870	1337	1591	1207	1793	1374	1980
YIL068C	737	1174.99	943	1279	826	820	1085	1275
YCL025C	40121.4	21000.7	31489.5	23706.6	38913.9	37729.5	21407.7	40381.3
YNR034W	279	572	451	655	274	475	478	508
YOL085C	2	0	2.046	2	0	2	1	2
YNL282W	207	176	129	224	199	151	133	174
YBR286W	10767	13566	12866	12752	14877	15859	18014	15356
YGL144C	410	360	247	456	421	324	376	365
YDR190C	2304	2500	2054	3320	2482	2037	2183	2393
YAL031C	736	918	805	928	833	931	780	1084
YBL006C	779	1212	691	1216	903	1029	650	805
YNL132W	2006	1422	1265	2365	1773	836	1296	1427
YBR264C	294	431	306	378	416	434	325	424
YBR231C	370	371	335	471	436	448	312	393
YLR162W-A	9	9	5	9.18	13	8	6	4
YPL197C	4.009	6.008	1.002	3.004	2.006	1.001	2.004	1.001
YHR076W	982	1280	1056	1410	1082	1344	937	1329
YDR462W	301	622	418	751	306	502	278	421
tP(UGG)Q	0	0	0	0	0	0	0	0
YJL148W	1194	1035	618	1358	1075	584	725	697
YIL057C	7	151	33	328	12	68	15	48
YPL055C	389	569	397	682	525	594	400	516
YLR353W	815	1237	962	1194	975	1025	858	1153
YIL020C	208	246	172	352	219	142	218	216
YIL148W	7610.82	10844.6	6364.8	13388.2	6625.94	8699.04	6239.58	7717.79
YNR016C	10430	13525	13930	18480	8967	11235	11309	14550
tY(GUA)J1	3	1	2	1	0	0	3	1
YFR036W	122	116	101	132	153	130	117	120
YER023C-A	1.012	2	0	2.047	2	1.015	0	1.019
YHR114W	741	1195	1002	1455	912	890	1125	1362
YGR028W	919	1615	988	1299	1005	1275	850	1312
YER150W	926	1270	2956	396	1531	1928	5161	2163
YNL279W	58	197	69	158	52	83	57	65
YDR400W	427	723	486	768	412	465	474	560
YDL068W	3	0	0	5	7	3	2.012	5
YOL027C	1966	2170	1597	2568	1836	1813	1539	2022
YPL257W	104	179	145	177	156	139	185	205
YPL120W	255	407	460	509	341	303	456	533
YOL145C	2138	2524	2158	3238	2338	1589	2291	2787
YJL099W	490	594	489	783	488	568	544	640
YHR149C	1078	836	604	1217	1333	598	731	762
YDR395W	1720	1958	1855	2782	1896	957	2316	2090
YOL110W	403	455	437	522	740	609	618	550
YDR005C	1478	1714	1643	1753	1708	1336	1737	1918
YMR311C	1579	2458	1968	1998	2018	2431	2234	2295
YHL041W	2	1	0	2	1	1	5	0
YBL039C	1844	1699	1142	2496	1625	1017	1117	1223
YGR188C	332	297	253	479	511	241	385	313
YOR362C	2654	2988	2547	3181	2979	3538	2526	3080
YPR106W	875	633	701	765	1075	672	1100	896
YLR126C	856	656	802	727	1016	727	1015	798
YDL053C	756	1067	675	1100	805	868	692	967
YML074C	2841	4166	3189	4275	2992	3459	3074	3251
YKR062W	616	783	665	897	669	892	732	864
YBR235W	2137	1430	1841	1596	2495	2058	2243	2423
YER010C	784	788	741	915	896	1037	768	942
YML003W	96	195	125	140	119	86	151	212
YMR097C	465	777	667	862	491	720	590	779
YDL133W	630	826	605	931	808	749	677	822
YNL330C	1276	1648	1503	2035	1502	1618	1386	1771
YGR228W	8.126	33.379	14.261	9.032	7.028	6	15.184	6.057
YHR096C	202.908	203.86	221.686	183.932	296.901	219.644	364.892	246.904
YBR008C	717	541	609	699	810	685	645	842
YDL035C	1231	1423	1433	1746	1458	1267	2035	1686
YMR253C	626	538	586	684	763	723	758	709
YCR102C	174.882	152.968	118.222	183.713	170.851	179.737	160.166	147.103
YJL127C-B	328	580	328	487	326	468	292	501
YOR257W	576	890	634	919	686	654	754	738
YGR002C	487	647	562	819	595	538	538	738
YEL041W	353	430	569	424	448	494	698	605
YGR075C	156	222	250	238	223	125	253	279
YGR253C	2741	3166	2989	3353	2953	3228	2879	3224
YDR510W	1505	2479	1718	2539	2074	2425	1762	2252
YEL014C	0	3	0	0	0	1	0	0
YPL050C	1954	2395	1575	3092	2214	1838	1571	1997
YMR166C	229	345	266	465	258	316	228	352
Q0115	0	0	0	0	0	0	0	0
YPR045C	457	1142	634	981	705	724	833	814
Q0110	0	3.988	0	0	0	0	0	1
YPL231W	18504	19553	22593	26306	15696	20137	19007	24299
YLR148W	654	1205	998	1250	760	603	1038	1346
YMR137C	347	473	462	629	413	283	478	493
YDL082W	4981.1	5945.09	3374.13	7700.48	4354.5	4434.84	3448.53	4413.19
YKL155C	605	923	483	1174	510	538	327	638
YBR162W-A	810	1289	586	1199	935	1125	585	837
YFL042C	877	1125	1295	1258	1109	1577	1493	1757
YBL083C	215.326	217.71	167.171	324.598	234.823	243.795	154.096	213.901
YDR148C	3702	5207	4157	5856	4888	6722	5560	6979
YHR052W-A	219.694	666.696	501.642	79.603	282.241	304.204	1004.15	295.75
YPL096W	570	755	720	793	631	759	742	879
YDR335W	1550	2319	2011	2677	2171	1707	2749	2496
YPR141C	389	471	433	617	538	276	461	533
YJL067W	0	1.007	0	2.008	1	0	0	0
YMR039C	1071	1827	1306	1513	1383	1438	1342	1452
YIL058W	0	1	4	0	1	3	2	3
YNL320W	483	577	430	668	473	591	471	539
YPL078C	3953	5768	4369	6425	4636	6631	4591	6594
YCR095C	330	538	396	603	441	306	436	420
YLL011W	792	500	307	804	729	370	330	419
YCR077C	2376	3096	2440	3696	3079	2676	2572	3504
YLR437C	177	247	240	409	276	285	195	224
YFL064C	198.657	37.791	43.046	83.696	15.213	204.787	74.981	45.41
YNL191W	316	200	199	295	1333	169	1031	224
YDR237W	580	1143	731	1373	567	862	450	893
YJL110C	704	787	1139	1157	779	1027	396	1189
YKR048C	2444	3964.79	3127	4293.93	2853.94	3443.92	3049	3795.95
YBR001C	823	1166	1531	1874	1088	1087	1675	1592
YPL003W	296	469	417	692	384	546	514	532
YKL108W	432	331	298	456	547	337	309	339
YGR110W	306	389	346	509	381	485	580	565
YJR074W	666	993	916	1044	706	1085	511	868
YPR127W	861	878	1039	1059	998	1297	1294	1254
YIR028W	330	111	965	119	354	862	366	812
YAL012W	5889	3482	3740	5084	29582	3745	23941	3839
YMR288W	603	671	551	814	635	517	553	776
YIL156W	617	832	858	928	703	780	852	1081
YBR241C	957	965	1205	855	1349	2112	1659	1463
YHR063W-A	4	4.013	1.004	2.007	1.001	1.003	2.004	0
YJL212C	2953	125	242	76	8357	418	5466	466
YPL156C	149	447	241	520	216	217	239	261
YNL312W	1496	1191	1191	1365	1837	1429	1285	1405
YLR187W	363	447	437	687	409	416	541	511
YDR099W	5882.23	6599.33	7401	7167.35	7805.36	7392.29	8516.41	9214.41
YKL133C	308	682	378	609	381	579	519	675
YLR400W	1	2	0	4	0	0	0	0
YHR170W	2624	2662	1841	3090	2794	1483	2190	2139
YDR259C	91	131	116	177	144	131	167	186
YKL068W	1449	1376	1123	1860	1624	1239	1176	1433
YOR032C	427	303	288	252	388	241	332	339
YKL093W	492	1233	878	1337	568	1328	767	1145
YMR002W	2406	3072	2432	4155	2827	2838	2110	2755
YLR145W	229	316	231	371	236	267	251	268
YLR261C	227.195	386.924	280.372	398.206	309.993	367.749	248.396	280.873
YDL246C	92.606	207.164	101.093	101.902	143	246.215	153	194.294
YER081W	759.952	3113.7	1826.33	2915.26	1237.93	1403.13	3257.77	1779.69
YPL178W	975	1277	910	1483	1149	1089	1018	1208
YMR172C-A	1	3.04	1	2	2.026	1.013	1	0
YPR202W	193.15	407.643	440.641	452.092	519.723	127.473	472.572	526.628
YIL096C	263	413	298	447	346	167	288	321
YOL046C	1	0	0	0	0	0	1.003	2
YFR011C	749.951	1205.94	856	1263	898	928	838.979	1189
YIL074C	4193.05	1380.3	1227.38	1726.74	16621.6	1650.53	15158.7	1526.89
YGL173C	3439	4932	4773	5743	3811	3985	5069	5811
YHL008C	558	774	699	880	732	703	919	860
YLR457C	284	348	273	382	374	326	268	353
YNL249C	298	415	297	436	303	293	330	440
YGR056W	754	917	640	1078	846	706	696	968
YGL065C	767	1116	802	1358	1033	653	1169	1280
YOR052C	1504	1671	2327	1527	2007	1874	2514	2144
YGR116W	2617	3736.99	2950	4390.99	2780	2477.99	3181	4009
YOR343C	20	34	23	34	39	46	19	26
YGL230C	4	15	7	13	8	23	4	9
YOL159C	187	227	243	328	211	212	287	391
YBR185C	338	785	429	868	290	427	317	611
YOR010C	159	299	196	334	266	262	242	300
YDR290W	0	0	0	0	0	0	0	0
YDR019C	3008	749	1480	896	2999	2198	2272	2424
YBR150C	536	749	847.367	1152.5	714	548	966.787	1069.58
YIR042C	190	106	92	62	1192	179	460	347
YFL031C-A	0	1	1	1	0	0	0	0
YER119C	983	848	1273	1134	1385	1721	1453	1567
YMR196W	1771	2292	5088	2205	2847	4363	5655	5971
YMR161W	471	599	454	702	590	581	431	564
YDR499W	606	724	681	924	703	540	613	894
YKL068W-A	437	210	75	199	3140	116	3102	115
YJL133C-A	1985	905	1334	661	2947	2599	2544	2162
YHL046W-A	0	0	0	0	0	0	0	0
YDL215C	16479	5022	38726	6036	6522	32868	7599	49282
YJR120W	62	53	58	112	69	86	83	101
YLL061W	965	365	239	631	4443	237	4670	297
YDR110W	625	633	490	790	710	361	657	515
YDR419W	539	570	562	702	687	614	602	712
YOR221C	843	817	821	840	783	884	833	1016
YPL214C	915	873	872	1030	1058	1129	948	1129
YBL108C-A	10.413	31.843	13.245	16.994	23.046	18.809	26.242	21.652
YGL165C	6	7.059	6.019	7.021	4	5	5	8
YOL064C	1743	1108	927	1129	4726	1283	5055	1339
YBL023C	793	849	655	1075	862	712	580	925
YOR274W	479	576	542	654	496	536	422	562
YOR329C	1227	1671	1433	1794	1467	1707	1982	1975
YLR005W	1090	978	1006	1329	1395	1173	1132	1350
YDR124W	75	112	156	165	72	75	128	96
tI(UAU)L	0	0	0	0	0	1	0	0
YNL267W	1101	1710	1608	1953	1281	1331	1364	1849
YBR134W	0	0	0	0	0	0	1	2
YLL047W	0	0	1	0	0	1	0	1
YLR461W	4.247	1.141	2.699	14.813	9.728	9.805	5.991	2.422
tI(UAU)D	0	0	0	1	0	0	0	0
YLR050C	483	413	401	552	494	642	476	526
YOR124C	1010	1776	1652	1766	1252	1417	1853	2263
YDR067C	409	558	407	493	477	321	513	522
YMR056C	360	408	287	370	391	502	344	447
YHR032W-A	80	70	58	108	94	67	89	68
YJL044C	1040	1415	1030	1380	1126	1002	1343	1385
YPR164W	638	888	920	1069	764	503	834	1046
YEL060C	16527	9925	16757	10505	23147	21768	22439	20628
YHR195W	858	1124	884	932	938	1299	1097	1134
YLR101C	31.219	27.077	32.084	36.08	21.051	21.122	38.104	31.065
YBL107W-A	9.167	17.643	29.324	31.82	21.475	1.062	19.442	16.259
YML026C	7610.95	12015.5	4939.5	11732.3	6329.1	7397.44	5144.72	6424.89
YPR066W	171	225	235	238	224	296	224	267
YDR073W	452	638	503	800	503	553	475	569
YDR229W	765	1090	959	1262	1081	1135	1119	1210
YDL181W	914	1777	1161	1726	1294	2042	1065	1930
YBR022W	326	517	339	540	341	384	291	372
YER177W	12539.6	14028.6	13104	13943.6	14778.6	18134.6	13875.5	15438.6
YML048W	3052	5326	3069	5536	3504	4638	2900	4233
YBL064C	1928	3545	3329	4203	2366	4282	3474	4081
YIL045W	697	1180	2007	730	878	1348	2677	2145
YKL221W	11	13	15	24	25	24	17	30
YGL126W	743	1535	896	1531	721	1516	750	1046
YLR167W	22203	35147.2	17181.7	38618.3	16494	25904.3	16433.4	21895.4
YMR270C	673	870	702	1073	873	724	769	926
YLR293C	6716	7277	6534	9294.92	6781	7288	6852	7322
YLR228C	618	984	714	1265	796	674	894	900
YJR053W	191	196	205	247	234	189	188	251
YJL171C	1749	2529	1939	2458	1782	2764	2654	2580
YDR374C	4	12	9	10	12	3	11	21
YKL021C	1034	1231	856	1519	1081	718	899	1083
YDL167C	915	960	549	1198	938	443	592	673
YLR388W	2461.42	3351	1802	4386.37	1864.37	2226	1530.36	2326.86
YLR373C	873	1160	1088	1539	1149	731	1243	1403
YKR001C	3222	4043	3768	4818	3561	3682	3943	4727
YKR054C	763	1403	1315	1275	896	990	1654	1660
YIR034C	24309	944	1260	1255	12869	2027	14021	1835
YGL013C	767	1096	1012	1387	1031	653	890	1181
YJR068W	851	1193	838	1296	960	986	900	1072
YGR207C	1459	1643	1573	1895	1412	1910	1354	1935
YDR212W	2699	2849	2563	3779	2626	2291	2640	2780
YNL052W	2209	3023	2204	3467	3164	3697	2275	3567
YGL188C	260	307	263	377	335	393	324	371
YNL025C	340	406	456	417	474	388	537	597
YGR121W-A	1	4	5	1	0	4	3	4
YGR091W	293	379	355	428	371	342	347	424
YDL232W	141	145	115	222	101	169	97	192
YPL119C	347	377	361	405	367	455	370	614
YLR242C	177	392	213	391	237	140	256	330
YMR031W-A	1	0	1	1	1	1	0	0
YJR148W	5509	2605	9183	2721	3157	13350	2965	11615
YJR082C	403	560	392	559	450	481	412	521
YOL087C	1661	2654	2055	2529	1986	2626	2341	2961
YNL134C	8425	9462	9347	8632	11054	12693	9704	11311
YAL037W	251	155	278	165	260	228	231	295
YGL146C	168	373	186	424	192	331	215	361
YCL075W	0	0	0	0	0	0	0	0
YBR262C	603	912	553	961	625	846	542	720
YPL199C	867	1075	820	1240	919	908	1023	1026
YML101C-A	9	18	10	35	19	18	17	21
YFL036W	1106	1953	1303	2381	1052	1278	1124	1802
YDL209C	339	256	161	380	399	262	207	270
YIL051C	2826	1993	2660	2350	3805	2990	4064	3105
YPL057C	2130	2416	1790	3419	2879	1879	2930	2577
YNR010W	182	195	169	222	206	178	194	178
YDR365C	4431	4960	5570	3870	3974	3560	4417	4457
YLR308W	1	0	0	0	1	0	2	0
YNL169C	1688	2708.89	1953	3504	1485.84	2078	1108	2146
YFR034C	850	532	537	757	1104	710	658	638
YHR070W	719.966	635	501	782.855	806.671	574	564.951	659.959
YDR460W	405	462	424	544	507	503	445	519
YNL112W	10241	5752	4459	6347	10464	3636	5872	4522
YHL047C	635	585	538	801	1067	548	1206	649
YOR360C	885	975	827	1531	985	564	898	915
YOR335C	7555	5416	6047	7928	7972	5744	7583	7667
YDR354C-A	0	1	0	0	0	0	0	0
YKL100W-A	0	0	0	0	0	0	0	0
YGL251C	370	380	408	376	326	388	341	613
YER156C	2382	2878	1638	3033	2062	2441	1553	2202
YPL255W	548	554	289	722	667	443	394	490
YOR095C	802	1010	517	1226	681	393	417	598
YEL038W	550	566	474	723	720	743	499	675
YCL014W	634	721	868	1033	856	604	882	1026
YOL025W	519	569	601	651	614	439	699	776
YPL208W	838	732	786	1018	914	758	949	1001
YOL147C	2251	564	561	847	1755	797	1309	656
YNL280C	1411	1396	1235	1723	1616	1421	1511	1480
YDR007W	819	1048.83	870.898	1359.92	836.859	1088	759.827	1039.87
YIL160C	50	78	63	88	158	175	126	166
YPR089W	1208	1577	1227	1810	1454	990	1332	1720
YBR233W	559	691	552	775	723	658.977	519	659
YPL122C	430	576	417	681	524	384	432	532
YKL104C	2739	4829	3406	4388	2946	3680	3121	4114
YMR313C	873	1057	910	1237	1046	1010	1232	1300
YGL179C	255	482	324	411	252	417	295	325
YGR120C	219	345	346	432	263	239	315	376
YML001W	1960	2190	1603	2174	2136	2277	1905	2133
YLL028W	615	406	734	769	677	341	1051	432
YER016W	815	1068	884	1179	1067	1028	1055	1140
YHR061C	455	371	322	647	680	431	496	484
YDR438W	282	432	290	447	403	309	417	459
YNL211C	85	153	75	133	74	59	91	102
YLR124W	1	5	0	0	1	3	1	5
YML058W-A	30	21	21	44	39	35	28	56
YLR026C	649	869	660	1046	790	848	556	773
YJR065C	3269	4733	3946	5161	3624	5177	4126	5115
YDL131W	16633.7	2775.16	3352.91	3570.99	12349.5	5000.87	12456.8	4765.62
YMR095C	38	13	13	16	22	30	35	60
YER138C	26823.3	38713.1	49191.7	17322.3	19882.5	34959.2	41863.7	42903.1
YDL033C	235	370	260	342	268	316	164	340
YMR255W	1103	947	1017	1072	1457	1089	1070	1173
YHR209W	259	368	506	466	318	595	457	690
YGL247W	150	292	115	276	221	185	179	199
YCR100C	149	137	165	127	153	168	177	246
YDR516C	1505	6483	4582	5972	1828	5747	5935	5976
Q0130	0	13	8	7	1	2	2	9
YPL233W	385	466	439	486	554	570	470	583
YOR255W	1	1	1	2	3	2	0	5
YOR063W	34818	44381	27393	53943	27636	39717	29189	35546
YOR200W	0	3	0	2	1.011	1	2.023	0
YGR251W	302	298	263	298	405	261	288	315
YPR047W	269	655	438	611	301	503	312	571
YDR246W-A	17	13	10	15	11	18	13	8
YDR044W	607	769	726	1202	835	896	883	872
YEL016C	737	849	700	1030	887	904	855	997
YAL027W	247	370	293	428	307	340	314	400
YKL153W	18.022	26.031	24.035	9.01	21.034	21.031	32.042	12.013
YFL019C	6	17	22	18	13	7	20	34
YMR139W	808	1277	1080	1442	885	1144	1276	1585
YDL080C	720	901	759	971	779	926	919	992
YOR172W	502	783	486	879	535	491	518	832
YOR105W	163.727	242.215	167.056	234.257	217.751	149.284	208.123	231.675
YJL138C	12233.8	11622.7	8016.58	14858.6	10703.3	11742.8	9729.47	10431
YPR143W	848.999	942	543	847.999	942	534	568	587
YDR340W	109	431	307	309	255	71	404	349
YNL322C	2058	2764	2524	3263	2663	3080	3059	2672
YPL090C	10753.9	14438.8	7797.76	17260.7	8293.68	10677.7	7771.73	9209.31
YPR078C	0	8	1.14	3.854	1	2.246	0	4.611
YCR075C	605	670	503	651	773	876	653	737
YFL062W	21.415	1.517	5.484	7.745	3.623	15.844	23.235	9.476
YDR171W	3183	6468	22382	7587	3022	6837	26994	9744
YLR439W	525	909	651	1193	579	956	449	878
YCR020C	156	159	188	199	228	139	252	204
YDR450W	7266.05	11009.5	5538.5	12800.7	5721.9	8104.56	4884.28	7069.11
YCL051W	1001	1182	1169	1292	1202	1421	1351	1400
YCR097W	480	1870	795	1176	924	667	1043	972
YBL039C-A	0	0	0	0	0	0	0	0
YDR235W	437	949	702	1015	614	369	748	924
YGL194C-A	70	192	140	170	150	104	159	144
YER038C	176	248	197	287	226	182	254	300
YPR125W	752	814	497	1091	765.96	597	467	724
YHR049W	2441	2935	2606	2949	2926	1998	2775	2422
YBR007C	1138	704	797	946	1495	758	1080	898
YPL001W	391	427	253	566	380	356	278	399
YJL038C	4	12	4	6	8	11	9	6
YNL319W	2	10	5	19	7	3	13	10
YPR178W	466	609	449	589	574	648	443	697.978
YER079C-A	0	1.003	0	0	1.004	0	2.007	0
YDR475C	1060	1148	1459	1041	1352	1491	1956	1754
TLC1	705	2622	987	2864	964	905	916	1390
YNL159C	386	610	484	653	501	592	564	747
YAL014C	573	714	585	822	683	766	694	705
YCR020W-B	178	270	103	259	237	88	123	183
YBR243C	865	1305	926	1704	960	1126	951	1269
YLR181C	525	660	621	754	686	635	670	768
YBL056W	2496	4156	2973	4061	2874	3387	2970	3894
YNL075W	937	772	495	987	932	472	590	599
YPL150W	986	1160	1371	1312	1193	1222	1595	1616
YJL012C	2787	2074	2293	2728	3105	2525	2740	3126
YJL065C	375	527	440	603.998	453	534.997	436	539
YKR020W	321	465	346	456	431	405	350	462
YMR053C	166.808	318.737	320.975	339.374	208.913	328.026	352.973	439.405
YKL066W	323	682	414	749	497	433	509	662
YMR004W	869	1261	1201	1537	1041	1101	1206	1491
YER083C	1213	1242	1314	1822	1601	1716	1315	1647
YPL176C	995	1406	1088	1742	930	1247	1083	1505
YHR172W	362	371	368	592	536	303	390	545
YLR263W	255	286	282	430	325	217	317	395
YDL240W	1396	1739	1137	1649	1551	1323	1152	1895
YDR401W	7	13	7	11	11	6.523	3	9
YGL118C	0	0	1	1	1	0	0	0
YHR013C	787	986	833	1192	989	876	808	1076
YOL040C	10294	15224	8402	17740	9683	12125	8299	10444
YGR072W	638	687	588	856	767	459	719	725
YCL035C	2053	2436	3112	2296	2858	3729	3848	3716
YIL023C	529	892	621	1099	556	886	540	740
YNR073C	17.582	62.681	40.152	119.001	36.044	80.694	37.996	112.009
YPR200C	55	89	49	78	74	58	78	85
YIL072W	44	66	49	66	53	68	40	117
YLR327C	2854	6308	5216	5977	4527	6176	8060	6037
YBR229C	907	1607	1257	1906	1070	1236	1273	1574
YML133C	599.084	270.778	506.238	376.768	496.538	635.809	345.48	550.756
YOR131C	473	762	538	683	529	658	529	602
YLR455W	687	746	742	952	793	636	869	825
YNL247W	3511	4077	3466	5120	3472	2973	3619	4281
YOR054C	563.469	943.757	894.612	1099.94	1265.64	978.635	1556.4	1092.17
YGL007C-A	5	5	3	2	10	7	13	11
YFR028C	846	875	796	1508	1075	820	706	1031
YGR290W	0	2.009	0	0	2	0	0	2
YOR009W	153	158	153	242	217	190	205	169
YOR072W	6	17	21	17	15	9	7	20
YDR292C	1555	2144	1730	2316	1838	1613	1722	2206
YOR161C-C	5	3	4	4	6	5	5	3
YHR126C	3	5	3	2	3	1	2	4
YMR194W	2084.87	2358.2	1252.67	3227.52	1686.55	1824.23	1384.06	1502.66
YAL016C-A	1	2.018	2.01	2.009	5	1	4.02	5
YMR167W	483	495	522	567	544	435	512	615
YOR249C	415	609	532	696	504	367	559	793
YER117W	6727.48	10727.6	4405.68	11420.4	5930.36	7354.93	4553.86	5526.21
YOR301W	363	528	467	612	430	487	390	567
YPL187W	24	21	19	21	30	17	16	36
YKL218C	1937	706	1242	688	2000	1830	1792	1788
YOR140W	1046	1326	580	1529	1177	1114	693	1135
YDR391C	1231	1089	1404	758	1075	2042	1239	1802
YLL063C	175	176	183	317	248	189	260	192
YAR070C	0	0	0	0	0	0	0	0
YOR276W	1972	2727	1694	2928	1863	1951	1451	1919
YMR309C	3128	3368	1935	4766	2868	1379	2162	2770
YOR089C	1273	1521	1374	1511	1753	1706	1387	1673
tD(GUC)N	14	4	21	11	16	8.707	16	34.951
YGR258C	853	977	919	927	993	912	1217	1134
YNL146C-A	29	45	38.34	22	28	23	35	46
YMR180C	272	369	300	505	355	375	357	399
YGL163C	601	618	637	824	657	508	774	677
tD(GUC)Q	0	0	0	0	0	0	0	0
YDR417C	4.007	17.014	6.008	2.002	7.011	1.001	6.01	1.001
YOL131W	7	2	2	1	3	2	3	6
YOR011W-A	0	0	1	1	0	0	0	0
YPL283C	2066.58	1624.85	1411.6	1858.07	1953.3	1340.94	2116.82	2348.66
YBL021C	241	352	192	463	338	336	247	293
YHR215W	199.655	172.361	290.873	298.628	272.853	288.178	286.065	286.687
YLL045C	12321.3	16412.9	9172.29	21005.7	9585.89	12698.6	8698.95	11297
YLR156W	72.949	51.035	68.449	42.006	86.829	98.14	102.402	66.072
YLR007W	510	542	493	663	706	582	537	621
YNL261W	306	465	301	551	351	288	411	422
Q0092	0	0	0	0	0	0	0	0
tE(UUC)Q	0	0	0	0	0	0	0	0
YNL305C	980	1373	1320	1515	1452	1965	1735	1791
YJL046W	418	729	510	742	414	433	392	680
YKR078W	347	632	399	556	379	360	481	590
YOR191W	1056	1634	1552	1669	1326	1398	1844	1863
YEL074W	29	55	39	95	55	66	59	62
tE(UUC)M	0	0	0	0	0	0	0.5	0
tI(GAU)Q	0	0	0	0	0	0	0	0
YOL166W-A	0	0	0	0	0	0	0	0
YDR272W	1413	1873	1863	1823	1852	2384	2033	2283
YGR289C	590	1194.99	794	1308	669	1101	978	1308
YML020W	648	792	508	769	796	775	665	862
YLR103C	549	330	331	688	617	287	351	353
YOR294W	864	649	413	886	859	388	504	513
YEL062W	413	413	545	497	497	458	517	608
YPR064W	3	4	5	7	7	3	8	5
YPR031W	713	588	520	875	872	554	691	778
YLR038C	1566	2731	1860	2805	1965	2583	1950	2950
YNL096C	3427.37	3758.23	2323.33	5370.42	3158.01	2811.37	3037.21	2954.05
YDR038C	1608.9	1666.74	1267.59	1933.44	1978.76	1516.92	1603.58	2123.29
YPR160W-A	0	0	0	0	0	0	0	0
YDL187C	10	9	6	15	11	7	8	14
YBR024W	299	578	465	479	392	609	426	579
YER171W	752	1067	773	1442	924	552	859	933
YDL047W	1373	1539	1170	1862	1529	1543	1434	1395
YML046W	607	1008	672	1135	708	420	695	884
YGL124C	480	687	694	803	565	588	670	897
YMR276W	2430	2830	2833	3436	3177	3697	2754	3221
YEL059W	12	11	21	15	11	19	20	20
YDL160C-A	92	124	116	152	82	132	102	116
YLR165C	218	461	268	383	320	357	374	417
YCR069W	1823	1797	1879	2163	2391	2779	2253	2534
YKL223W	0	0	0	0	0	0	0	0
YGR146C-A	1	6	8	12	2	2	6	4
YKL027W	689	799	748	1232	606	576	576	726
YJL173C	648	790	587	749	799	575	581	630
YDR152W	1035	1473	861	1641	1117	844	889	1037
YKL127W	1840	2239	1886	2677	2172	2257	2148	2273
YDR309C	2399	3426	2322	3354	2969	2984	2176	2546
YLR386W	833	938	888	1115	1023	709	1089	1149
tN(GUU)Q	0	0	0	0	0	0	0	0
YLR371W	1384	1564	1492	1834	1453	1312	1668	1841
YDL169C	466	439	537	323	721	814	593	750
YLR092W	1538	295	198	340	12575	316	15757	272
YER044C	551	788	630	917	670	699	773	615
YMR072W	2581	3243	2773	3278	3387	3279	3112	3245
YJR033C	751	1176	1135	1186	863	1221	1309	1659
YKR056W	1125	978	793	1270	1175	643	764	856
YGL011C	2567	3258	2852	3550	2862	3778	2918	3522
YIR036C	724.994	800.994	992	950	815.998	1392	896	1138
YMR123W	536	805	586	928	652	690	525	639
YDR406W	786	3309	2691	3929	809	1032	1362	2050
YGR073C	82.288	64	78	88	87.266	70.229	87	85
YGR209C	4302	4993	4058	4922	3792	6132	4081	4537
YJL150W	2	2	2	4	3	1	6	0
tS(UGA)E	7.921	10	3	7	2	6	2	6
YNL050C	461	461	330	544	521	352	347	400
YMR304C-A	927.319	2502.34	974.982	2752.91	1147.55	1083.71	944.135	1338.03
YLR240W	697	896	817	1006	796	871	1079	1257
YGR093W	712	681	611	788	862	573	686	832
YDL234C	1490	2266	1993	2073	1695	2254	2480	2631
YPR108W-A	2	1	1	1	0	0	0	2
YNL136W	801	946	796	970	928	849	718	939
YKL049C	548	527	598	516	693	620	584	661
YJR080C	899.887	1555.96	1105.92	1725	991.863	1384	1014	1596
YNR038W	717	697	598	966	713	364	616	666
YGL140C	2173	1852	2287	2044	2513	1843	2480	2696
YCL029C	729	804	654	828	833	778	723	833
tY(GUA)Q	0	0	0	0	0	0	0	0
YFL038C	4617	5701	4808	6068	5421	6534	5117	5465
YJR131W	460	712	524	777	462	646	519	789
YNR012W	923	587	972	941	1111	576	919	1022
YNL110C	1362	1274	814	1380	1293	603	995	913
YAL068C	1.042	0	0	1.113	0	1.032	1.042	1.034
YDR367W	428	539	473	838	464	392	587	708
YIL053W	5588	5888	3690	7029	6462	5451	6550	4687
YPL059W	608	1171	832	1323	721	1036	585	1013
YGL253W	8050	19276	8730	30816	7526	9192	8540	10578
YHL032C	1314	2431	1616	2687	1453	2800	1810	2560
YJL010C	845	872	595	1175	792	398	677	726
YHL045W	2	5	2	1	6	2	3	3
YOR337W	1354	519	754	507	1214	811	1072	893
YMR010W	787	1264	684	1423	931	638	685	1033
YOR097C	281	471	318	414	402	465	367	500
YHR118C	269	299	249	441	389	249	340	343
YGR024C	807	1283	826	1368	846	710	791	1069
YOL023W	569	805	554	1027	554	620	455	837
YPL253C	346	353	270	552	448	291	340	464
YOR008C-A	0	0	0	0	1	0	0	1
YER154W	1285	1713	1280	2109	1316	1632	907	1548
YBR300C	1	4	0	0	0	3	0	3
YEL036C	1753.64	2295.34	1493.04	2853.38	2030.82	2097.59	1616.43	1869.63
YBR260C	644	823	752	1026	696	775	696	929
YPL124W	227	160	165	263	251	170	167	172
YAL042W	2823.99	4162.99	2756.99	4936.99	3320.96	4304.97	2537.99	3479.99
YAL035W	4106	4597	3296	6079	4032	3136	2845	3978
YNL286W	458	755	510	677	550	643	542	745
YDR001C	2948	4162	5597	4361	3652	5032	6709	6287
YIL162W	862	2242	956	2906	1141	1382	1244	1418
YOL141W	161	137	123	164	183	74	120	145
YHR145C	31.603	163.123	141.628	136.149	90.313	19.37	138.938	108.904
YBR195C	573	395	341	578	721	494	540	528
YIL039W	1893	2696	1823	2989	1956	2368	2059	2399
YGR122W	482	775	699	885	620	633	531	836
YPL092W	3418	1084	1213	874	1477	2106	1513	2440
YGR161C-D	401.573	394.748	279.147	754.754	242.695	313.7	304.392	646.783
YMR315W	1928	3017	2917	2980	2209	4281	3270	3859
YGR213C	22	23	19	38	23	26	18	29
YDR384C	336	630	241	931	293	401	331	387
YML007W	2322	2785	2473	3040	2755	2297	2627	2768
YER063W	1545	1724	1406	1923	1896	1855	1609	1848
YDR481C	4788	2377	3872	2595	4874	5286	4203	4585
YER014W	622	611	705	769	903.998	808	887	952
YPR041W	2907	3831	2381	5071	2799	2259	1951	2795
YNL213C	393	691	345	638	506	492	344	507
YKL006C-A	301	505	266	477	334	385	257	333
YDL159W-A	0	0	0	0	1	0	0	2
YBR058C	1154	1411	1130	1774	1154	1126	1297	1643
YLR024C	384	625	705	596	469	372	671	842
YLR071C	1122	1520	1201	1828	1286	870	1427	1560
YHR092C	191.067	152.043	145.036	133.061	232.08	148.028	232.057	231.084
YDL199C	309	428	476	429	466	495	572	584
YHL007C	1780	2041.98	1715	2530	2031.94	1584	1734	1896
YER181C	2	1	3	2	4	2	5	1
YNL228W	0	4	6.028	5.033	5.018	3.031	3	2.007
tV(AAC)O	1.523	0	0	0	1.355	0	0	0
YDL064W	691	895	578	927	892	816	788	784
YDL031W	1729	1531	1185	1989	1611	919	1197	1290
YMR257C	514	927	586	1101	517	425	531	794
YBL108W	0	0	0	0	0	0	0	0
YDR046C	3884	4347	1571	2805	3394	3432	4070	3350
YOR253W	575	937	463	792	597	746	546	609
YOR202W	1660	678	838	863.852	1312.79	1488.82	1178	1355
YEL010W	1	0	0	0	0	0	0	0
YGL245W	8437	7954	8172	9619	8343	8749	9621	9292
YGR006W	142	186	157	224	172	147	140	205
YGR079W	873	371	538	614	1171	335	865	444
YDL119C	233	340.988	296	349	239	388	258	392
YKL151C	946	1339	1619	1111	1307	2015	2015	2069
YGL198W	998.973	1273.98	1004.96	1468.94	1182.92	1668.99	1001.97	1353.95
YDL086W	1237	1419.96	1333.98	1422.88	1405.97	1994.95	1340.93	1486
YBL091C-A	284	450	335	342	334	530	363	442
YLR361C-A	174	256	175	244	218	249	201	233
YBR141W-A	0	0	1	0	0	0	0	0
YOR170W	0	0	0	0	0	0	0	0
YHR038W	222	551	353	585	229	254	309	418
YML069W	2173	2743	2230	3362	2649	2201	2321	2830
YKR019C	352	354	287	340	430	439	419	418
YJR073C	6935	9781	7789	13321	5199	12335	4715	8939
YGR279C	12179	13493	14754	17231	13588	16046	14769	18279
YCR073C	381	535	379	710	360	355	379	488
YCR022C	6	6	6	7	7	8	2	3
YLL015W	1077	1872	1686	1988	1508	1411	1965	2261
YNL195C	38	64	151	62	74	144	345	119
YDL134C	1946.57	2499.68	1871.08	2584.27	2164.38	2493.19	2232.63	2568.75
YFL060C	171.862	223.684	173.563	288.03	165.199	221.51	148.635	236.426
YDR173C	216	257	322	415	287	268	426	307
YMR100W	716	988	694	867	831	607	861	904
YCL057W	2150	3446	2817	3730	2470	3103	2599	3740
YOR335W-A	0	0	0	0	0	0	0	0
YBR072W	2573	575	6745	374	4793	1956	13516	2909
YBR005W	392	548	385	489	537	881	430	551
YPR123C	34	62	47	71.716	67.882	78	48	92
RUF5-2	702.863	3682.8	1961.41	3283.71	658.423	587.497	2191.99	700.751
YDL173W	1037.99	1670.97	1175.99	1759	1344.99	1684.98	1189.99	1309.98
YJR047C	18.01	33.02	17.014	39.016	34.024	37	41.014	23.003
YMR006C	1863.65	2631.72	1695	4569.49	2440.38	1981.89	1680.69	2334
YKL145W-A	26.922	14.827	15.06	22.365	26.962	65.708	18.545	22.171
YAL016W	2704	3615.98	3379.99	3974.99	3128	3275	3794.98	4241
YMR292W	494	884	562	944	704	367	617	642
YHR011W	251	389	241	412	288	365	259	435
YPL152W	361	468	500	605	473	424	575	468
YLR183C	1060	1080	878	1409	1371	709	1152	911
YNL077W	820	826	2967	1445	847	633	3581	1180
YBR109C	2390	2568	2378	3044	2343	2927	2496	2965
YBR172C	1463	1476	1085	2056	1474	893	1089	1288
YDR346C	2780	2989	2286	3305	2928	2755	2540	3140
YAR002C-A	2388	4038	2424	3755	2735	2897	2325	3042
YOL077W-A	1051	3010	1266	2027	1350	2091	1054	1909
YPL029W	408	513	386	669	431	405	307	472
YHR146W	3150	3788	3649	3704	4403	4054	4551	4073
YNL019C	0	0	0	0	0	0	0	0
YDL242W	0	5	0	3	4	7	4	4
YBR189W	11452.7	15403	8467.99	20580	8913.96	12086.2	8043.12	11195.7
YER085C	2	5	3	5	10	6	9	4
YJL225C	1342.23	2208.97	2363.68	2693.19	2147.84	2834.34	2748.44	2886.56
YKL064W	1500	2290	2259	2381	1454	2063	2480	2660
YLR265C	444	668	510	765	503	376	614	819
YKR022C	569	701	539	806	676	728	542	764
YLR287C	571	654	457	770	613	314	533	566
YPL174C	570	862	614	835	716	410	649	928
YOR070C	880	1045	953	1167	1085	1111	1003	1315
YDR403W	74	114	94	132	60	99	100	111
YOL093W	469	472	327	603	561	339	428	378
YOL042W	451	701	448	733	538	665	497	718
YIL070C	1023	1811	950	2116	820	1164	579	1304
YCL037C	13	15	15	24	14	12	9	12
YIL025C	2	5	5	5	0	7	3	2
YDR545C-A	20.113	10.617	26.026	13.014	43.209	36.603	26.179	0
YNR071C	45	31	22	32	49	33	60	40
YML131W	955	1193	1064	1347	1268	1188	1144	1287
YNL245C	292	322	289	326	380	312	340	393
YNR024W	336.908	405.882	257.734	411.532	355	213	264	266
YFL013W-A	4.006	5.018	2	1.001	4.005	4.005	2.002	3
tP(AGG)N	0	0	0	0	0	0	0	0
YLR329W	21	23	15	38	39	12	25	18
YPL043W	1724	1290	806	1533.99	1609.99	719	956	913
YCL045C	2877	3848	2680	4519	3216	3329	2872	3660
YBR056C-B	0	2.021	3	1.004	2	5	0	1
YKL002W	1367	1903	1476	1691	1576	2104	1329	1948
YDR328C	1492	2440	1628	2232	1972.99	2403	1628.99	2175.99
YIR009W	143	126	116	167	141	167	107	132
YBR154C	1621	1729	1168	2138	1506	1079	1180	1397
YLR001C	1005	1144	1215	1264	1309	1064	1484	1565
YAR035C-A	0	0	0	0	0	0	0	0
YKR101W	327	292	304	500	415	265	349	431
YMR230W-A	1	8	0	6	2	2	2	5
YER115C	307	521	336	558	338	366	417	456
YHR124W	83	105	113	140	107	118	93	112
YER148W	1461.94	1716.98	1292	2163.99	1616.98	1606.98	1482	1666.99
YCR050C	0	0	1	1	1	1	1	0
YMR240C	529	424	335	518	577	420	452	444
YOR303W	13066	3853	4222	3526	11678	5426	12997	6411
YIL087C	338	509	523	460	471	902	573	708
YMR192W	494	737	473	990	552	489	563	664
YCL074W	0	0	0	0	0	0	0	0
YJL221C	146.448	258.384	171.687	420.103	196.859	222.495	265.583	286.872
YMR229C	2822	3090	2217	4252	2463	1129	2333	2544
YLL038C	289	403	242	469	326	330	325	410
YOR056C	1253	1198	887	1475	1427	839	1062	1036
YOL108C	477	582	626	575	658	695	473	712
YOR270C	7969	8299	8118	9990	8186	7847	10144	10350
YDR106W	18	35	20	34	19	27	26	21
YOL068C	1630	1932	1451	2105	1929	1587	1554	1868
YMR182C	218	260	199	285	314	211	269	267
YBR201W	286	731	358	571	341	452	381	449
YLL043W	1632	2016.6	1619	2601	1824	2012	1775	1944
YDR415C	479	781	583	877	624	755	580	723
YGL161C	1252	1832	1339	1801	1558	1974	1565	1945
YOL133W	324.992	385	364	474	396	524	330	475.998
YDL074C	1286	1476	1097	1955	1562	891	1326	1525
YNL263C	1237	1372	1128	1775	1441	1355	1196	1348
YHR217C	13.725	21.938	14.661	24.727	14.664	14.613	21.705	22.29
YDR128W	1042	1188	1108	1324	1203	1195	1216	1494
YOR193W	167	475	282	422	248	197	332	392
YER028C	38	70	46	85	62	59	67	79
YMR052W	131	209	168	226	159	128	163	247.888
YIL029W-A	0	0	0	0	0	0	0	0
YMR294W-A	4.023	9.005	5.007	2.004	3.004	3.006	2.001	7.013
YKR076W	763	928	1098	798	916	1290	1182	1418
YDR225W	12625.2	8413.21	6816.43	9103.07	14935.4	11309.7	11901.9	8248.02
YDR270W	867	688	665	783	1034	766	768	853
tL(UAG)J	15	24	22	13	2	5	11	10
YPR033C	4347	4251	3371	5561	3733	3753	3620	4319
YGR230W	205	279	269	342	280	340	263	308
YPR062W	1175	1620	1254	1783	1352	1518	1102	1481
YDR528W	601	466	239	722	611	357	318	322
YER173W	442.987	519	411	663	639	411	415	568
YBR026C	1725	2266	2393	2203	2118	2689	2550	2915
YDL185W	11574	9644	12501	11758	12241	11126	16461	14370
YBR091C	134	139	124	238	106	135	68	102
YNL094W	1052	1345	1202	1577	1335	1346	1322	1611
YGL056C	1235	1377	1058	1713	1383	1151	898	1258
YPL227C	642	833	574	1080	816	610	615	682
YLR222C-A	17	12	12	24	15	6	21	11
YDL010W	668	897.997	685	1085	993.984	878.989	823.99	921
YML019W	748	1005	651	1219	856	674	759	938
YDL045C	681	1061	795	970	781	953	855	930
YLR163C	827	1077	988	1515	862	1013	596	1141
YLR178C	1415	1574	2828	1008	2052	3747	4521	3279
YKL225W	0	0	0	0	0	0	0	0
YHL002C-A	2.006	2	0	0	1.002	0	5	2.011
YJL175W	0	6.02	1.002	0	0	0	0	2
YBL079W	1113	1682	1385	2172	1232	779	1236	1590
YNL056W	523	727	515	752	604	702	584	683
YFL001W	525	585	349	742	553	412	371	412
YDR150W	1484	2540	2299	2697	1908	1878	2946	2829
YER147C-A	19.062	8.021	1	7.009	8.021	10.019	10	4.007
YKL170W	408.997	742.992	491.981	730.962	381.994	631.991	349.967	584
YPR157W	252	273	353	194	162	222	336	307
YPR137C-B	2259.58	1203.7	1441.76	0	928.766	3999.77	517.377	2891.39
YLR384C	2180	2898	2124	3605	2186	1633	2433	2849
YPL060W	268	364	311	405	327	303	355	412
YML099C	1379	1105	1564	1143	1586	1258	1455	1771
YLR421C	933	1521	1142	1386	1130	1178	1069	1227
YLR090W	600	843	634	723	511	770	443	707
YMR325W	0	0	0	0	1.356	0	0	0
YJR064W	2940	3407	2558	4359	2810	2714	2654	3107
YML022W	1593	2035	951	2422	1268	1259	916	1202
YER046W	306	366	284	412	474	386	428	374
YMR029C	1080	1542	1562	1559	1255	1393	1500	1887
YIR030C	322	124	584	197	413	372	475	477
YKR050W	458	654	620	782	568	668	606	854
YMR121C	651.941	696.869	611.019	697.413	659.771	767.075	566.287	665.269
YGL017W	384	399	380	510	458	493	392	517
YDL150W	745	719.999	464	868	757	420	509.999	483
YNL038W	490	1029	447	735	657	377	567	643
YHR001W-A	1009	1967	1368	2009	1492	1505	1594	2177
YOL165C	8.01	5.359	8.582	7.223	5.196	5.1	16.298	15.541
YIL139C	179	395	213	376	212	167	193	264
YLR246W	1168	813	1016	819	1498	1313	1100	1301
YJR119C	428	415	322	496	585	249	500	477
YLR359W	10363	5375	7155	5258	7502	9932	6886	10291
YLR199C	644	945	749	1079	760	693	762	841
YJL206C	310	361	392	437	411	391	457	600
YIL142W	2694	3260	2671	4111	2895	2907	2553	3048
YGL082W	1102	1635	1383	1726	1402	1677	1506	1777
YNL138W	3101	3952	4092	4675	3672	4322	4054	4915
YOR133W	18533.5	22921.9	17539.1	27166.9	16544.1	21514.6	17994.8	20767.2
21S_rRNA	65	142	58	84	47	33	62	52
YGL142C	552	972	579	1018	831	638	835	921
YGR179C	439	486	440	581	542	501	443	649
YGR102C	443	547	491	574	608	581	543	705
YBR139W	2738	3298	4546	3374	3347	5081	4472	5488
YHR188C	1877	2592	2177	3107	2351	2975	2274	2773
YKL106C-A	0	0	2	1	1	1	0	0
YNL116W	920	636	876	964	1168	801	1178	1049
YNL139C	752.754	1343.29	1109.49	1450.41	846.269	772.589	1197.15	1452.09
YDR361C	1029	1078	778	1208	1014	645	870	893
YLR445W	1	3	1	0	1	2	1	1
YGL255W	8654	1640	2275	1054	8245	2790	6761	2749
YFR007W	252	499	334	564	295	393	336	461
YLR333C	2226	2765	1568	3743	1973	1969	1710	1942
YHR103W	1521	1784	1563	1728	1714	1566	1908	2099
YHL030W	684	923	981	1119	748	681	937	1037
YGL077C	4201	3710	4449	5705	4055	3216	3770	4014
YPL204W	2677	3340	2460	3395	3120	3029	3033	3352
YPL251W	1	2.009	1.005	1	1	0	1	1
YIL009C-A	396	428	434	371	447	497	476	602
YOR091W	868	784	660	1367	888	599	565	779
YGR026W	2036	3281	2545	3113	2718	2148	2839	3205
YAL040C	1396	1737	1294	2002	1840	1695	1367	2386
YDR288W	444	609	494	642	515	427	539	571
YGL208W	524	667	646	631	612	1020	799	921
YNL284C	689	1500	824	1556	760	1007	636	1118
YIL164C	4685	376	544	316	4916	908	3676	823
YOL143C	1176	2527	1565	2879	1288	2132	1314	1781
YBR237W	824	1048	722	1125	836	973	784	1039
YBR197C	435	431	371	498	490	453	387	492
YHR147C	534	1148	636	1103	507	784	441	837
YJL093C	1120	1488	1073	1580	1371	1532	1283	1676
YPL126W	2119	2110	1779	2545	2361	937	1851	1720
YMR317W	9	28	10	29	11	28	20	26
YOR251C	1161	1153	1015	1382	1260	1426	1199	1339
YPR181C	4141	4862	4222	6388	4475	4748	4479	5289
YCL008C	600	583	634	755	645	737	740	798
YOR107W	1301	604	423	617	1964	676	1130	702
YML005W	382	353	314	414	345	323	347	370
YNL215W	730	956	816	1071	980	974	975	921
YCR075W-A	183	209	164	233	205	291	188	207
YDL059C	330	118	89	151	2098	136	1657	137
YOR204W	3383	3066	3145	3882	3308	2593	4528	3142
YEL012W	1119	1673	1428	1316	1605	2012	1617	1816
YBL040C	1004	2267	1088	2280	1103	999	1115	1368
YPR043W	6145.32	7983.41	4577.68	10613.5	5115.9	7423.48	4299.98	5722.94
YDR382W	7484	12206	6930	14006	6531	8010	6899	8738
YDR483W	5270	5708	4261	6066	5604	5975	5000	5465
YER061C	866	515	738	426	611	1006	630	1083
YLR022C	403	417	377	559	408	314	376	396
YLR402W	74	56	65	54	86	71	76	99
YLR073C	138	97	70	175	159	58	105	74
YER183C	418	405	367	574	416	530	383	487
YHR090C	431	440	365	577	472	454	352	481
YOL021C	1740	1766	1333	2140	1638	1417	1211	1726
YHR030C	1376	2045	1619	2378	1294	2147	1412	2132.49
YBR295W	434	525	493	516	441	488	526	672
YKL018W	300	364	254	502	320	335	272	330
YIL011W	82	114	100	192	90	117	91	121
YEL034W	7171.97	8128.96	5800.94	11922	7006.95	7277.97	5640.94	6873.95
YHL015W	9297	13454	7687	16775	7503	9756	7012	9600
YNR050C	45199	1745	2398	2429	35299	3091	43976	2824
YDR134C	9075.62	5861.18	8643.31	7470.3	9691.08	7573.87	8481.91	12247.8
YKL208W	205	325	301	367	242	351	264	350
YGR004W	229	349	281	448	303	212	281	300
YML110C	1582	2882	2340	2788	1788	2838	1938	2632
YGL048C	3066	3932	3434	4157	3367	4404	3485	4259
YGL243W	351	496	357	536	403	380	403	447
YKL106W	669	444	391	731	677	478	557	490
tN(GUU)N1	8	15	15	4	8	12	17	12
YPR029C	1139	1830	1600	2427	1517	1288	1776	2139
YJL034W	9112	18550	23547	24613	6432	13501	25251	15430
YFL048C	1201	1830	1301	2182	1320	1574	1308	1732
YLR117C	825	985	818	1124	883	790	814	1054
YOR176W	1629	2660	2202	2525	1806	2991	2155	2967
YOR109W	1181	1541	1543	1976	1234	1177	1642	1778
YBL089W	506	629	514	734	657	570	594	687
YDL084W	6823	9350	7498	10665	7398	7494	8115	8919
tC(GCA)Q	0	0	0	0	0	0	0	0
YGL116W	686	804	778	986	785	762	994	934
YNR034W-A	670	5306	2789	636	655	5432	2871	4203
YCR024C	275	396	353	529	253	267	256	404
YIL102C-A	168	201	120	203	139	183	135	240
YMR102C	500	1386	803	1526	561	729	940	843
YCR071C	307	661	434	687	320	527	268	489
YDR175C	596	1066	619	1173	611	822	456	817
YOR189W	397	539	437	528	491	572	374	538
YOR154W	686	599	525	734	811	377	653	719
YPR121W	595	617	527	677	652	763	609	698
YBR070C	462	492	360	676	557	519	476	508
YOR396C-A	0	0	0	0	0	0	0	27.496
YLL017W	5	3	3	10	6	7	5	12
YDR351W	854	920	686	1148	977	689	645	1039
YNL315C	1314	1772	1306	1808	1324	1741	991	1678
YPR174C	340	360	354	427	442	315	335	378
YJR045C	11801	21153	26557	27373	8988	17431	23701	20044
YMR008C	3301.35	3921.28	3544	4396.51	3540.62	4150.1	4517.31	4601
YDR349C	1645	2146	1701	2548	1845	1955	1816	2197
YDL171C	8639	5214	7875	6907	9478	8007	12290	10776
YKL062W	2425	2088	2441	2262	2711	2772	2494	3773
YJR010W	2715	452	436	549	25361	443	25926	462
YJL218W	23	52	28	69	32	40	26	53
YIL126W	1697	2312	1875	2917	2014	1566	1935	2342
YDR093W	964.786	1705	1296.4	2136.84	1011.37	1041.21	1307.33	1583.53
YMR282C	471	848	540	1084	556	577	482	668
YIL109C	3170	4351	3747	5485	3439	4196	3910	5171
YFL022C	3706	4084	3710	5847	3622	4328	3014	4244
YPL109C	504	893	753	750	718	821	971	1111
YJL156C	879	940	811	985	1039	793	899	1107
YNL071W	4114	5932	5825	6726	5040	7794	5514	7024
YMR088C	3924	1653	4842	1898	4773	5462	3534	5809
YGR211W	2174	2127	4338	3310	1584	1200	5383	1694
YKL139W	405	466	391	670	533	303	493	496
YJL069C	754	451	370	717	639	330	317	342
YDR323C	233	278	223	371	271	248	223	343
YDR344C	22	21	19	13	31	24	24	41
YJL016W	891	918	1285	875	1083	1150	1711	1352
YDR444W	797	960	835	1242	1073	855.994	1156	1088
YPL189W	29	69	39	56	45	44	54	77
YLR285W	632	895	687	1220	846	588	642	741
YLR267W	36	112	70	85	57	80	67	148
YDL219W	352	658	362	635	424	330	393	440
YNL017C	1	2	1	4	2	1	3	0
YCR024C-A	1914.1	2401.04	2184.46	2484.76	2971.8	1285.47	2662.93	2565
YCR024C-B	2722	4911	4744	5790	6038	1606	5944	5916
YKR024C	653	437	242	558	560	266	246	309
YBR156C	401	489	435	711	513	393	426	557
YOR076C	404	591	463	696	460	305	479	650
YEL059C-A	184	196	178	219	183	305	145	252
YDR405W	606	1053	711	1240	725	948	518	805
YOL091W	88	101	118	150	123	47	169	148
YCL031C	933	1255	761	1550	929	572	818	903
YIL027C	458	925	501	918	541	354	535	668
YLR459W	640	1126	650	1295	823	545	756	1033
YNL243W	2541	3200	2817	4384	2766	3634	2796	3815
YNR026C	651	743	589	1054	723	611	601	764
YHL044W	73	146	127	152	105	109	157	157
YPR204W	5531.88	6464.42	6012.62	7051.9	7011.11	7015.58	6764.63	6976.12
YNL297C	788	1434	1280	1618	924	663	1290	1564.98
YBR170C	760	927	894	1028	971	920	882	1108
YGR149W	733	1218	1264	1093	772	865	847	1415
YDR458C	1319	1534	1305	1705	1384	1210	1580	1799
YKL193C	1019	1375	1440	1452	1220	1426	1775	1892
YPR099C	9.129	15.019	15.096	12.032	25.136	26.115	20	23.04
YOR135C	3.017	3.005	0	0	0	2.005	1.003	3.016
YLR310C	2024	2791	2393	3456	2151	1819	2635	3169
YNR008W	590	935	721	1086	669	823	711	867
YJR150C	0	0	3	2	1	2	0	1
YBR301W	4.098	5.947	3.995	10.445	3.682	6.054	7.688	6.121
YLR003C	510	707	516	906	542	290	500	586
YER113C	702	1000	684	1380	837	702	728	936
YHR122W	570	512	397	632	506	542	423	533
YHL017W	555	1020	604	1125	612	681	712	900
YJR010C-A	265	334	246	401	168	351	178	354
YIL085C	1128	1485	1126	1781	1192	1261	1281	1519
YMR190C	461	608	555	724	597	568	544	758
YLR325C	5012	6559	3220	7848	3804	4412	3056	3853
YCL076W	0	0	0	0	0	0	0	0
YOR272W	1275	1049	832	1540	1199	656	956	850
YOR058C	466	652	548	869	601	471	532	775
YER172C-A	1.013	0	0	0	0	0	1	0
YAL064W-B	14	25	22	39	23	28.655	34	34
YDR413C	1.002	8.058	3	4.011	0	2.004	5	2.01
YBR203W	522	829	697	1086	524	757	777	1251
YAR029W	22	44	32	52	31	22	33	31
YNL238W	1638	2005	1396	2030	2102	1796	1881	1835
YJL198W	1643	1421	980	2015	1737	962	1292	1391
YOL135C	239	270	250	366	297	295	273	285
YOR323C	2718	2853	2417	3661	2576	3077	2969	3144
YLL041C	2321	4127	3106	5297	2920	5930	3046	6052
YKR074W	958	1883	964	1457	1035	1307	1097	1276
YMR274C	243	349	242	415	259	259	245	346
YER026C	3760	6246	4905	8184	3199	5135	2563	5383
YMR201C	363	517	515	592	442	518	486	564
YLR069C	1096	2149	1375	2849	869	1685	731	1765
YML042W	186	326	305	338	271	521	370	685
YMR050C	757.86	1123.96	1615.17	526.819	550.823	866.535	984.898	1448.09
YDR069C	513	904	726	981	668	551	748	964
YOR298W	44	53	42	75	43	45	72	70
YEL066W	1426.94	579	1074	704	1449	1487	990	1152
YPR035W	47601	28442	47883	23698	40938	74341	28952	69802
YDR014W	244	377	313	398	340	184	372	526
YDR227W	745	872	996	1221	904	639	1113	1081
YPR060C	637	503	471	711	784	469	508	534
YMR037C	1282	1718	1239	2060	1604	1509	1583	1817
YCR038C	310	362	326	431	367	362	410	507
YNL257C	846	1480	1498	1815	1392	1062	1506	1721
YCR072C	527	335	201	485	487	273	265	263
YBR093C	388.372	560.508	346.382	553.312	458.763	576.231	376.015	545.119
YNL092W	105	137	192	175	128	225	161	267
YGR045C	5	17	8	20	17	22	7	23
YAL037C-B	16.021	63.09	9.011	4.005	20.023	12.015	36.044	3.003
YLR134W	408.652	426.58	418.85	822.56	683.286	399.709	659.091	467.905
YOR218C	0	1	0	0	1.006	0	2.006	0
YMR203W	2222	3931	2479	4699	2037	3413	1767	3331
YKL096C-B	2	4	0	1	2	3	6	5
YPL225W	1932	3335	2002	2669	2385	2377	2194	2386
YPL270W	1249	1755	1336	1882	1471	1759	1571	1960
YDL012C	400	617	381	654	436	586	385	513
YDR218C	6	7	10	15	3	11	14	15
YLR299W	3406	1850	3423	1907	3609	4420	3300	4171
YFL003C	32	82	41	79	46	53	48	77
YPL051W	300	344	245	391	327	326	245	311
YNL054W	782	1016	986	1222	869	866	968	1237
YDR156W	375	369	269	477	415	261	328	339
YPL062W	0	4	5	1	0	0	3	4
YPR155C	783	1349	1113	1422	969	1063	1131	1618
YOR137C	788	991	742	785	958	955	1075	1043
YKL123W	102.193	184.477	125.199	198.674	148.098	132.715	151.537	151.747
YKL172W	2005.82	1776.76	1158	2104	2020.82	972	1132	1159
YNL336W	1152.05	1258.25	1160.88	1192.64	1183.11	1376.14	1648.4	1684.09
YDR305C	329	465	374	556	455	436	414	468
YJL057C	791	1215	1418	1066	891	1522	1813	1810
YPR100W	737.871	1518.98	858.904	1480.97	709.864	1216.88	558	1058.96
YDR358W	826	1298	1471	1416	1009	1556	1711	1912
YJL152W	1	6.004	2.002	11.016	2	6.004	2	7.005
YLR096W	1168	1232	900	1522	1182	839	805	1212
YDR194W-A	0	0	0	0	0	0	0	0
YKR052C	366	396	389	477	365	404	342	480
YLR427W	941	1204	863	1285	1083	1177	957	1165
YDL152W	2.009	0	0	1.002	1.002	0	2.007	0
YGL015C	3	12	7	15	4	9	4	3
YEL064C	670	611	579	677	712	615	528	757
YMR127C	341	308	259	361	437	217	302	276
YIL140W	2210.45	2326.8	1616.93	2935.86	2429.91	1788.92	1983.88	2090.81
YOL163W	71	43	25	42	317	45	223	57
YLR197W	4052.98	5232.93	2993.99	6487.99	3080	2292.99	2525.99	3116.99
YBR213W	251	135	84	229	1522	141	1125	92
YAL064W	0	4	2	2	1	1	13	4
YJL204C	405	626	598	771	604	327	672	794
YLR244C	2733	3164	2354	3827	2778	2455	2614	2842
YJR084W	507	583	509	689	547	631	492	678
YLR233C	456	595	460	755	610	376	553	682
YDL238C	672	321	834	341	662	1113	634	974
YGL084C	853	1635	1138	1923	1053	1083	1198	1513
YLR382C	1126	1374	1088	1672	1208	1282	833	1490
YLR154C-H	17	5	3	14	22	0	1.004	2.009
YLR154C-G	172.365	127.25	119.254	228.252	144.991	260.453	129.638	156.814
YGR238C	403	594	563	954	516	421	498	708
YDR363W	527	755	562	669	496	651	506	784
YNL114C	9	11.061	7.017	8	11	8.049	12	9.019
YNL163C	1484	1363	1209	1613	1691	1084	1441	1443
snR55	0	8	8	8	7	0	4	5
snR54	3	0	1	4	6	0	4	2
snR57	5	31	14	17	5	5	7	14
snR56	0	1	0	2	0	0	1	0
YHR009C	1164	2058	1674	1939	1323	1740	1545	1848
snR50	4	11	4	16	3	9	2	13
snR53	0	1	0	0	0	0	0	0
snR52	0	4	1	0	0	0	0	0
YFR050C	2035	2901	2311	2940	2364	2861	2318	2583
snR58	0	0	0	0	0	0	0	0
YLR331C	1.015	3.034	1.014	0	3	1	2.018	2.012
YNR069C	826	342	776	413	701	537	1376	751
YOL058W	60396	2283	7527	1744	40854	18743	38008	16729
YAR019C	369	483	521	594	472	568	605	714
YOR024W	5	1	1	2	0	1	1	0
YML129C	387	812	460	748	329	737	386	656
YGL257C	1035	1762	1218	2000	1272	1044	1260	1641
YGR020C	2810	3313	2658	2989	2961	3414	2908	2981
YOR093C	743	925	911	1525	815	628	822	1090
YAL046C	310	392	307	503	282	516	266	401
YOR392W	3	7	5	4	3	1	5	5
YAL039C	761	946	814	1330	866	1139	563	1015
YGR100W	1015	1415	1151	1356	1173	1436	1283	1630
YLR403W	1396	1362	1201	1831	1534	1248	1544	1573
YOL118C	5	21	9	11	13	15	11	17
YDR286C	127	240	193	232	156	210	159	214
YHR141C	6446.01	9817.46	3969.47	9920.12	5286.5	6523.78	4170.92	4986.13
YPL128C	685	649	530	1072	791	606	711	836
YJL091C	542	1212	723	1380	634	444	677	935
YBR191W	7875.23	10315.8	5657.97	12798.1	5905.65	8271.68	5315.11	6990.79
YDR380W	5939	1633	4640	2720	8396	4435	7448	5956
YGR191W	2369.97	2280	1604	2520	2188.92	2210	2119.96	2464.97
YGR047C	832	889	845	1198	1125	791	1005	1205
YDR485C	873	1042	891	1031	1069	947	1010	1132
YPL239W	847	933	1041	1208	854	652	1097	801
YPR183W	1953	2685	2151	3113	2240	3047	1823	2595
YOR206W	2333	2260	1808	3013	2291	883	1921	1941
YEL049W	18.168	10.048	14.159	14.084	24.369	36.802	26.078	28.84
YOR391C	0	20.429	19.069	27.13	22.908	45.951	18.91	21.367
YDR525W-A	292	318	233	298	273	241	392	322
YBR089W	2.005	5.01	6.006	1.001	2.005	1.001	2.004	0
YLR075W	21587	26901	15263	34988	18254	23967	16694	19742
YBR054W	2351	1014	3563	383	1558	2144.13	6372	2912.14
YLR020C	762	951	621	1193	870	655	659	778
YNL217W	1307	1190	1072	1215	1544	1247	1291	1210
YLR404W	256	399	250	400	359	267	293	358
YLR154W-A	1.02	0	0	0	0	1	1	0
YIL013C	402	254	328	303	346	360	368	485
YPL206C	1071	1298	1433	1655	1392	1594	1376	1640
YDL060W	1656	1472	1027	1772	1625	869	1210	1161
YBR293W	649	798	613	972	1084	684	820	923
YNR052C	1101.27	1164	888.906	1436.93	1162.39	1261.92	909.337	1155.76
YHR032W	1157	1131	859	1418	1243	937	1042	1095
YEL032W	1731	1317	1136	1470	1816	1470	1359	1600
YOL076W	459	706	568	1058	645	291	599	687
YDR136C	1	3	1	5	0	2	6	3
YHR203C	9562.13	11223.4	7218.67	14920.8	8187.11	8558.55	7153.07	8264.12
YJL136W-A	0	0	0	0	0	0	0	0
YML112W	450	386	401	556	511	438	451	457
YLR154W-C	4.015	13.067	7.014	6.018	12.009	10.05	11.014	12.014
YGL241W	623	767	848	1105	740	512	875	835
YDL071C	12	9	9	9	16	8	13	15
YPR176C	612	741	616	920	765	842	682	796
tS(UGA)Q2	0	0	0	0	0	0	0	0
YDR057W	775	885	655	965	802	633	795	856
YJL036W	818	1260	1053	1247	1025	1040	1033	1267
YDR521W	0	2	0	0	0	0	0	1
YER009W	3467	4245	3240	5102	3229	3168	3256	3982
YLR115W	696	914	738	1067	780	700	725	1106
YLR140W	0	1.03	1.073	2.407	0	2.097	0	0
YGL114W	1726	1337	1268	1620	1780	1671	1601	1899
YER167W	1019	1020	673	1146	979	893	862	1038
YMR104C	825	2391	1569	2161	735	2562	1673	2947
YER185W	60	100	77	97	83	64	83	90
YDL195W	3782	4944	5104	6064	4255	4485	5763	6477
YNL199C	913	996	986	1449	1077	881	1032	1097
YCR026C	1266	1743	1498	1830	1800	1680	1637	2036
YBL052C	956	1146.88	920	1381.99	1142	710	914	1206
YBR076W	7	8	9	9	6	7	10	16
YNL317W	374	482	476	629	468	516	435	565
YLL019C	1939	1871.11	2015.49	2323.24	2536.58	2029.67	2639.98	2729.36
YOR156C	376	371	359	491	475	439	370	467
YHR052W	1433	1250	622	1411	1269	493	652	798
YKR026C	848	813	629	1116	859	639	656	699
YJR043C	521	481	338	562	696	387	372	484
YJR012C	251	323	274	342	282	336	253	290
YKL060C	103682	83491	87597	88904	99809	121646	114035	102435
YCR044C	650	985	590	1044	666	835	667	813
YKL035W	5951	10898	14135	9963	7725	14538	16906	15459
YLR264C-A	0	4	3	5	4	0	3	2
tQ(UUG)B	0	0	0	0	0	0	0	0
YNL073W	1713	3440	2176	3514	1657	2660	1747	2513
YMR280C	223	952	601	1035	334	853	686	1124
tQ(UUG)L	0	2	1	0	0	1	0	0
tQ(UUG)Q	0	1	0	0	0	0	0	0
YFL020C	41	31	50	52	51	54	59	58
YNL328C	55	51	52	50	57	57	69	79
YJL014W	3025	3498	2963	4122	3344	3140	3058	3495
YMR031C	4271	5980	5922	5355	5316	6884	7853	7615
YOR174W	472	748	514	818	558	636	534	688
YPR149W	5248	7436	8665	7262	6633	8207	11993	10916
YNL015W	2895	2961	2862	2544	3172	4114	3218	3568
YCR084C	3352	3390	3630	4843	4156	3660	4047	4390
YHR178W	414	426	513	699	570	509	593	629
YHL050W-A	0	0	0	3.445	0	0	0	0
YDR260C	378	415	326	430	425	426	291	402
YLR283W	300	535.999	402	677	394	368	505	499
YPL170W	457	627	464	651	564	735	507	613
YPR001W	68	86	75	101	75	131	60	161
YDR204W	528	880	903	869	711	1074	969	1034
YBR085C-A	987	1957	2363	1734	1194	1687	1731	2246
YDR251W	2022	3525	2467	2946	2269	2771	2846	3561
YNL048W	992	1360	898	1546	1130	1029	981	1366
YML057C-A	1	4.019	0	1.002	0	8	1	3
YOR074C	968.984	794	828	961	1175	903	950	846
YPL028W	3727	3864	3324	5300	4454	5275	3517	4487
YJR152W	19653	631	9527	693	19309	11024	19881	10633
YKL025C	963	1352	1069	1532	1259	1084	1253	1571
YAR008W	468	317	251	400	620	293	270	313
YOR003W	732	327	724	392	946	758	957	741
YOL097C	2432	2806	1975	3271	2134	2202	2125	2312
YOR110W	618	896	623	887	669	815	744	860
YDR407C	850	1308	1095	1669	1002	724	974	1279
YNR020C	304	461	258	532	322	374	187	343
YBR258C	106	194	103	208	104	146	82	152
YNL146W	21	40	32	60	36	8	26	57
YFR019W	777	1299	1288.07	1415.05	927	938	1369	1576
YLR262C-A	1327	2468	1068	2082	1261	1746	908	1356
YIL115W-A	0	0	0	0	2.03	1.024	0	0
YBR223C	276	381	353	425	346	434	348	491.86
YNL241C	3913	4704	3853	4801	8123	5680	8998	5037
YJL154C	1340	1950	1629	2193	1590	1460	2061	2078
YDR091C	2478	2316	1615	3579	2331	1256	1704	1986
YJL123C	1888	2357	1934	2691	2314	2272	2268	2354
YHR066W	790.306	480.255	296.197	655.529	685.119	291.86	284.325	320.509
YPL047W	277	295	236	269	323	335	213	357
YER086W	6890	3624	3600	4782	6477	5047	5922	5242
YLR287C-A	5570.43	9594.05	4780.59	8317.47	5552.99	5982.1	4583.48	6316.11
RPR1	16	45	23	49	32	38	24	29
YBR176W	257	372	313	593	300	274	289	350
YDR207C	572	743	601	1046	692	637	596	714
YKL125W	459	430	426	711	694	364	662	410
YDR373W	715	1147	840	1190	871	907	852	1007
YGL238W	1575	2498	1892	2912	1683	1026	2163	2391
YLR190W	1479	1778	1586	2172	1883	1842	1732	2309
YNL128W	69	76	114	117	72	106	132	110
YLR312C	735	803	962	821	982	898	1202	1008
YKL191W	1105	1081	1099	1653	1177	943	1005	1144
YNR006W	1193	1422	1192	1456	1398	1365	1292	1605
YHR120W	529	561	418	728	538	414	391	614
YAR050W	126.482	143.736	178.052	208.433	181.815	164.55	324.325	215.918
YOL137W	471	658	511	952	560	424	589	598
YDR530C	664	926	799	983	892	1285	946	1211
YER111C	484	610	590	854	616	309	663	646
YER144C	776	1076	819	1205	1038	1048	969	1103
YOL039W	4717.65	5756.15	3513.28	8175.7	4024.2	4636.59	3248.53	3956.49
YIL083C	783	981	854	1129	916	897	1024	1188
YHL011C	2014	2355	1691	3053	1781	1757	1556	2194
YFR010W-A	1.049	3.063	0	0	2	1	1.021	0
YGR184C	1506	2022	1970	2178	1672	1321	2120	2412
YMR303C	49.208	176.501	66.247	245.488	58.473	118.316	47.027	97.143
YDR307W	611	1188	987	1210	886	660	1106	1302
YDR411C	1179	1892	1228	1896	1447	1941	1458	1707
YBR205W	1043.76	2051.45	1170.81	2121.3	1236.15	1360.83	1139.86	1511.67
YOR321W	750	1146	802	1321	869	1067	833	965
YMR186W	18455.5	30736.7	43785.3	46257	13728.7	18888.5	42604	28032.3
YMR278W	798	974	1049	1011	846	1176	1208	1454
YLR136C	195	168	216	188	556	209	527	168
YGL260W	0	0	0	0	0	0	0	0
YMR207C	683	852	877	899	745	686	1027	923
YML015C	526	748	462	795	611	580	513	593
YOR197W	2041	2489	2201	3074	2241	2659	2390	2817
YKR089C	2008	2666	2915	2689	2314	2873	3018	3593
YDL041W	0	0	4	0	1	3	1	4
YKR072C	1089.53	960.229	796.388	1260	1054.33	873.365	977.599	1047.83
YDL014W	5958	5783	3891	7750	5472	4246	3849	4586
YML040W	0	0	0	0	0	0	0	0
YJL127W-A	1	1	0	0	0	1	1	1
YER079W	1014	965	1448	785	1272	1445	1812	1481
YER024W	797	632	857	772	1042	1309	868	1496
YOR230W	8356	6565	9367	7831	10723	10478	12924	10301
YGR234W	5352	7814	5880	10964	4232	6973	4340	9244
YMR178W	1033	1370	1073	1275	1153	1278	1384	1433
YPR037C	1079	1071	789	1064	1274	1411	932	1070
YEL068C	350	270	263	255	360	371	298	306
YNL090W	433	651.997	476	802	514.997	523	363	481.996
YOR307C	758	977	830	1158	784	639	850	953
YMR225C	456	865	431	785	458	737	339	579
YBR095C	550	715	498	766	685	495	589	640
YDR036C	796	1127	945	1632	785	987	695	1041
YGR043C	206	380	319	358	301	452	449	469
YPL223C	93	55	85	78	397	82	292	113
YPL272C	250	332	252	486	323	220	315	340
YPR002C-A	43.51	99.305	75.172	154.701	64.488	57.17	88.899	90.231
YOL002C	1341	1407	1238	1662	1844	964	1362	1466
Q0032	0	0	0	0	0	0	0	0
YEL032C-A	0	0	0	0	1	0	0	0
YFL005W	1736	2432	1666	2335	2012	2153	1735	2073
YCR010C	19	20	24	23	12	26	18	28
YMR152W	1385	1675	1554	1669	1441	1698	1604	1942
YDR154C	5859.26	6224.82	6053.45	7598.39	6371.72	7977.47	5879.17	6113.97
YMR125W	1711	2709	1859	3476	1873	1160	1509	2411
YJR031C	757	904	1002	1256	1011	565	1134	1118
YCL026C-A	18	16	11	11	20	27	34	19
YCL026C-B	215	385	312	452	494	310	558	317
YGR118W	6391.73	7477.9	4518.92	8541.44	5421.46	6359.33	5012.1	5189.91
YJL055W	2315	2918	2307	2667	2709	3118	2655	2803
YPR102C	6188.4	9103	4933.74	10895.2	4716.69	7337.24	4607.06	5790.95
YNL334C	125.138	272.316	214.437	203.97	214.801	285.49	202.365	308.574
YGL123W	20055.9	27016.9	15040.9	32292.9	16554	21429	14931	18742
YPL064C	521	667	582	755	664	641	566	752
YPL086C	1158	1193	989	1674	1105	778	930	1159
Q0250	1	7	2	3	0	3	7	3
YPR153W	111	124	100	166	148	130	133	190
YMR042W	212	174	151	202	227	167	188	176
YLL003W	870	982	850	997	968	722	956	1208
YER042W	1390	450	518	530	3874	424	4534	581
YDR109C	597	615	519	772	766	580	637	705
YDR221W	874	1168	984	1251	987	1092	1058	1402
YLR109W	4003	6320	7778	7019	4044	8200	6793	6887
YKR009C	238	393	280	331	347	547	333	500
YMR078C	712	715	721	1052	885	471	752	692
YLR094C	780	807	597	995	698	767	650	760
YBR037C	352	773	698	982	454	813	470	716
YLR041W	16	18	18	34	17	22	17	36
YJR060W	749	723	956	1192	1053	775	787	1082
YNL161W	965	1256	1016	1510	1141	1071	989	1280
YIL146C	904	461	999	570	1132	910	1090	1047
YLR195C	977	1470	1150	1726	1151	1173	947	1399
YJL202C	1	1	0	1	3	0	3	2
YAL066W	0	0	0	2	5	0	13	0
YCR081C-A	0	0	0	1	1	0	0	1
YLR231C	1195.99	1044.99	1436	1245	1465.95	1607	1659	1681.96
YKL016C	3757	5542	4402	6002	5099	6252	4943	6471
YPL111W	1126	4893	7547	7902	873	6875	622	6006
YKL174C	974	1387	1068	1449	1091	970	1269	1281
YKL121W	572	867	731	822	674	882	845	1064
YLR380W	1318	1435	1182	1695	1654	1513	1182	1472
YOR142W-B	3612.1	4815.95	5340.91	4869.57	4019.32	3196.86	5788.73	5597.23
YMR012W	2908	4853	3508	6240	2637	2637	2352	4578
YER093C	543	879	671	822	601	528	562	861
YOR032W-A	8	13	10	10	33	12	58	7
YDL201W	820	813	436	984	737	469	538	634
YDR468C	649	896	789	802	911	810	761	935
snR73	3	3	3	2	1	0	2	1
snR72	2	6	4	7	5	0	5	8
snR71	0	1	3	5	2	0	1	0
snR70	26	31	22	53	30	33	27	38
snR77	2	13	9	13	5	2	9	10
snR76	13	67	23	37	9	26	18	23
snR75	1	3	2	4	0	2	0	1
snR74	2	5	1	1	2	0	2	0
YFR003C	553	868	703	713	751	933	702	867
snR79	0	0	1	1	0	0	1	1
snR78	0	2	2	1	1	0	3	2
YIL033C	2063	3689	2935	3206	2368	4213	2838	3614
YOR368W	402	397	365	462	435	279	417	408
YGR128C	1078	1180	730	1543	1087	344	881	846
YIL048W	1008	1625	1070	1578	1106	1053	1202	1609
YIL142C-A	0	0	0	2	1	0	3	1.003
YLR337C	1187.98	1230	1614	1756	1343.99	1623.99	1618.97	2081.99
YOL056W	524	585	360	613	599	559	482	521
YFR052W	1753	2122	1847	2259	1892	1730	2085	2181
YGR088W	604	1482	3415	745	974	2460	3836	3035
[truncated: 4,845 more rows]
