# Supplementary material for: Cytosolic aggregation of mitochondrial proteins disrupts cellular homeostasis by stimulating the aggregation of other proteins
Source: bioRxiv preprint, doi:10.1101/2021.05.02.442342, version 2 (2021-07-09)
Supplement: Figure 2 - Source Data 4 [file 442342_file19.xlsx]

## Sheet: pam.metafile.gene.readCounts.0h
	I_pam0h	II_pam0h	III_pam0h	IV_pam0h	I_WT0h	II_WT0h	III_WT0h	IV_WT0h
YAL008W	539	914	561	459	611	585	509	872
YBR255W	342	606	471	294	426	407	385	565
YGR164W	1	3	3	1	0	2	0	4
YGR131W	12	30	26	6	17	19	20	34
YNL003C	350	523	427	233	323	340	302	490
YBR135W	221	282	281	167	176	221	184	422
YBR160W	551	902	820	444	501	582	505	780
YJL082W	758	1050	856	458	881	973	823	957
YJL142C	95.46	153.568	140.743	78.123	113.536	143.89	86.151	142.191
YPL191C	118	236	126	67	168	95	122	149
YGL215W	1042	2008	1111	615	1292	1017	992	1482
YKL074C	367	545	410	254	395	385	366	573
YJL077C	3	2	2	1	2	1	1	4
YKL096W-A	12067	19282	18117	13033	12951	15483	15187	27781
YIL124W	1206	1822	1612	1013	1025	1367	1058	1559
YLR364C-A	0	0	1	0	2	0	0	0
YIL171W	0	0	1	0	0	0	0	0
YPL039W	195	351	272	184	252	257	226	447
YNL170W	15	29	13	8.158	14.082	12.064	7.045	24.124
YGL141W	384	705	522	259	512	448	396	535
YJL179W	160	288	261	134	199	199	203	288
YDR316W-A	0	0	0	0	0	0	0	0
YDR316W-B	1037.06	717.286	896.329	366.304	302.423	586.92	725.215	546.239
YKL083W	8.05	2.008	3.01	7.066	12.088	2.007	5.034	14.104
YBR152W	135	221	216	105	122	162	168	255
YKL029C	882	922	1078	801.99	554	605.98	669	1449.99
YPL166W	106	203	157	68	107	135	126	148
YKL052C	421	576	545.943	336	416.916	505	432.85	690.875
YHR025W	737	1194	1075	686	745	980	859	1394
YOL034W	433	603	513	239	487	419	443	542
YBL008W	270	437	316	170	317	255	291	387
YIL062C	741	1129	1159	678	748	961	767	1262
YCL023C	0	0	1	0	0	0	0	2
tC(GCA)P1	1	1	0	0	0	0	0	0
YOL116W	280	409	372	245	287	323	316	512
YDR196C	410	645	626	338	433	468	500	711
YNL255C	1326	1777	1797	1335	1434	1694	1431	2786
YNR032W	236	295	342	203	233	257	265	394
YNR045W	510	816	759	451	586	626	623	928
YML105C	584	827	733	461	627	703	625	972
YNL288W	436	631	645	388	393	559	461	764
YIL059C	106	142	163	86	105	129.986	118	207.895
YIL004C	212	332	339	235	245	326	267	504
YNR018W	1343	1691	1723	1263	1652	1892	1734	2950
YPL144W	113	180	209	132	132	133	153	282
YFR047C	861	1363	1260	859	1011	1236	954	1713
YER087C-B	412	564	558	373	421	508	426	717
YHR078W	385	704	504	229	447	347	415	600
YIR023C-A	0	0	0	1.129	1	0	1	1
YJR115W	61	68	57	39	31	84	50	55
YLR355C	7360	11401	10716	7043	7125	9387	7449	13503
YGR099W	254	449	390	216	281	281	298	420
YLR300W	9172	14636	14056	8020	9367	10013	10805	16866
YCL028W	820	1297	1270	845	878	1181	966	1654
YJR140C	301	521	364	185	382	275	307	461
YOR033C	360	567	518	259	405	418	406	527
YOR062C	157	181	186	120	137	172	157	231
YBR043C	617	969	855	489	700	634	659	1009
YHR112C	336	546	479	323	329	390	394	607
YLR011W	139	224	250	137	143	138	136	256
YIL044C	306	457	459	256	392	425	350	601
YNL197C	1060	1627	1323	683	1028	1204	1093	1538
YKR103W	104	205	146	74	134	128	122	140
YLR133W	605	923	720	387	580	714	571	724
YER121W	70	107	83	42	68	66	75	120
YCR046C	545	849	865	648	548	686	560	947
YNL144C	970	1490	1309	724	1045	1355	1143	1814
YKL204W	864	1327	1169	629	880	1164	875	1133
YOR266W	350	542	457	279	351	383	334	579
YDR393W	245	411	342	193	234	263	274	362
YGL171W	390	497	384	251	377	312	318	502
YPR194C	342	799	501	147	483	455	610	560
YGR019W	933	1465	1411	812	951	1419	985	1540
YBL033C	894	1223	1267	864	869	1015	981	1893
tE(UUC)G3	0	1	0	1	0.5	0	0	1
YJL188C	23.018	8.003	17.007	16.008	18.007	5.002	14.009	44.004
YLL057C	20	30	30	13	11	25	11	23
YPL060C-A	19.738	18.118	2.103	6.725	1.902	1.853	2.988	1.79
YBR296C	73	89	79	61	41	50	85	146
YNL277W	44	43	56	18	39	44	42	37.21
YMR040W	89	168	143	95	89	108	124	181
YDR077W	33873	58841	51418	26096	35246	46099	36111	50420
YMR266W	1092	1819	1410	621	1177	1198	1197	1356
YKR064W	351	685	382	234	465	278	333	457
YPL089C	775	1215	1082	539	739	869	756	1161
YGR277C	311	460	440	260	294	371	319	537
YDL139C	71	128	127	90	74	117	80	144
YDR246W	309	496	477	294	288	375	356	549
YOR288C	201	358	236	152	279	251	211	373
YDL240C-A	0	0	0	0	0	0	0	0
YCR028C	363	527	483	227	364	377	399	530
YML054C	2035	3380	2854	1768	4142	5703	3375	5478
YLR179C	400	688	631	348	434	520	420	694
YOR141C	718	1168	862	499	738	728	733	1091
YPL280W	212.654	396.711	256.146	162.391	262.812	307.152	184.375	229.271
YBL106C	132	211	193	105	106	104	135	241
YGL044C	243	378	375	210	247	267	251	448
YER107C	315.923	479	497	286	321	388	321	571
YBR038W	1295	2181	1718	904	914	1046	1005	1371
YER076W-A	1	7	0	1	2	3	3	2
YGR259C	6.084	7.123	9.109	6.136	4.051	5.035	9.08	10.031
YEL047C	506	651	628	387	487	556	437	719
YPR016C	1309	1626	1446	875	1293	1251	1177	1887
YOR208W	422	885	464	254	518	470	381	510
YDL055C	4835	7601	6709	4487	5076	5574	5008	11288
YML009C	371	562	480	259	368	400	371	511
YML072C	1783	3098	2446	1177	2147	2190	1889	2643
YDR142C	341	530	423	221	365	396	323	472
YFL044C	410	658	674	383	516	648	486	797
RDN37-2	0	0	0	0	0	0	0	0
YEL011W	2498	4040	3470	1694	2451	4302	2409	3379
YKL019W	472	752	739	427	538	677	586	1039
YJL130C	9689	14769	12918	5120	9082	11180	8972	8927
YBL085W	1030	1669	1404	749	1111	1194	1114	1602
YBR116C	203.72	235.812	205.345	145.885	226.687	211.009	120.163	200.708
YDR166C	403	842	410	221	536	312	441	609
YHR212W-A	0	2	0	0	0	0	0	0
YDR082W	265	411	338	170	317	260	316	424
YDR348C	675	1000	906	543	767	819	724	1153
YKL182W	9776	15254	11722	5891	12750	13634	10768	14535
YDR445C	0	2	0	0	1.023	1	1	2.04
YKL018C-A	150	221	206	133	150	165	158	274
YPL027W	1	5	1	1	5	1	2	2
YKL135C	808	1258	810.952	412.908	814.879	671.944	829	967
YLR363C	103	224	122	73	177	115	110	139
YEL077W-A	0	10.828	15.509	7.388	0	17.289	0	2.726
YDR179C	71	192	56	20	135	29	92	78
YML089C	27	43	37	16	29	40	40	39
YLR431C	252	384	276	183	207	182	198	315
YKR046C	3052	4711	4422	3002	3120	4136	3228	6240
YJR005W	608	1206	749	416	800	592	674	937
YJL116C	813	795	852	745	1181	975	855	1674
YMR030W	214	402	251	149	297	303	213	266
YER030W	534	814	956	558	636	819	810	1157
YIR026C	284	384	361	220	250	273	245	510
YJR072C	627	915	896	617	595	737	643	1209
YDR515W	236	467	327	198	315	213	233	400
YKR039W	1562	2535	2109	981	1336	1668	1260	1975
YGL003C	519	703	604	449	544	592	540	906
YPL009C	699	1190	762	522	886	755	652.18	1299
YDR268W	233	420	326	199	225	199	249	336
YGL192W	11	2	8	3	6	2	5	9
YDL117W	529	800	653	369	459	493	526	750
YMR131C	1128	1260	1188	770	958	961	981	1759
YMR293C	245	439	330	202	266	251	229	337
YJL214W	27	76	52	22	21	32	26	39
YIL105C	656	1139.43	825.375	409	751.319	708	639	926.339
YML126C	3491	5662	4410	2478	3753	4010	3566	5328
YLR189C	908	1428	1060	524	871	901	815	1148
YIL150C	111	162	145	85	119	123	123	193
YLR349W	8	12.042	17	9.18	2	7.026	10	22
YGL250W	213	325	294	176	162	262	225	371
YBR212W	1353	2253	1918	1099	1317	1546	1412	2384
YJR109C	1264	1794	1530	731	1229	1151	965	1273
YLR254C	422	633	564	362	361	439	395	631
YGR085C	2800.91	3345.76	3426.21	2386.86	2710.77	3029.87	2641.07	5116.18
YPL105C	1317	1930	1635	997	1375	1560	1445	2039
YGR145W	555	714	531	333	551	403	456	693
YJR094C	45	86	40	17	44	22	49	59
YKL177W	6	9	4	2	4	11	6	7
YGL154C	134	218	209	129	180	174	165	235
tK(UUU)Q	0	0	0	0	0	0	0	0
YBR129C	240	447	354	204	337	293	296	471
tK(UUU)D	0	3	4	2	3	0	2	0
YMR322C	59.404	93.43	103.768	58.627	5.684	10.978	9.835	41.145
YKL099C	395	409	419	266	311	345	338	587
YDR315C	65	155	79	39	134	61	80	116
YLR394W	412	684	507	290	519	501	488	574
YNL104C	4503.85	6982	6185.73	3635	4978.71	6598	4473	7371
YNL151C	356	492	452	283	393	387	348	649
YNR066C	103	187	128	43	111	80	84	86
YLR220W	891	1345	1266	808	909	966	917	1484
YHR006W	861	1313	1213	647	896	1155	846	1194
YMR232W	41	79	49	18	53	24	29	34
YNL083W	417	639	621	310	498	567	490	700
YGR038C-A	0	54.477	31.001	0	0	0	0	0
YGR038C-B	1154.56	1462.72	1588.47	801.14	1005.99	1299.82	1263	1407.68
YMR238W	1023	1693	1474	752	984	953	978	1533
YER168C	347	529	466	236	349	322	404	537
YPL265W	1137	1240	938	380	1013	932	905	1307
YOR227W	1119	1900	1331	642	1202	1093	953	1349
YOR081C	601	992	801	450	584	713	615	736
YEL026W	995	1190	1241	758	896	935	992	1658
YGR050C	19	23	21	19	30	25	29	34
YDR021W	122	179	108	80	164	89	87	156
YGL063W	64	107	106	63	89	105	96	185
YPL212C	736	842	738	424	739	603	656	972
YOL157C	112.127	173.878	127.197	92.742	122.322	115.771	126.564	205.989
YOR345C	0	0	1	0	1	1	0	1
YPR095C	577	916	642	359	720	643	570	792
YOR310C	2068.24	2541.09	2219.7	1423.43	2143	1830.93	1781.38	3035.96
YDR188W	1883.99	2577	2591	1572.99	1914	2228	1886	3191
YOL128C	70	104	103	58	81	67	77	139
YGL236C	347	547	508	357.993	372	402	364	661
YHR133C	273	410	336	219	350	305	327	437
YDR017C	983	1388	1103	597	1039	947	964	1293
YIL090W	546	959	689	363	722	474	638	838
YBR183W	808	1287	1056	621	1002	1173	863	1058
YOL048C	427	823	599	323	511	486	488	621
YML039W	0	0	0	0	0	0	22.518	0
YCR007C	81	112	102	40	78	63	99	127
YDR540C	13	12	19	11	4	5	8	11
YEL004W	150	305	133	91	247	94	144	199
YPR057W	344	499	455	312	352	465	433	731
YLL032C	235	393	264	150	240	157	227	303
YDR116C	625	946	867	474	608	746	594	843
YPL119C-A	17	85	22	13	79	14	14	15
YDR299W	655	770	592	381	714	500	553	897
YLR030W	43	69	79	25	39	35	26	27
YDR122W	1227	1901	1653	874	1213	1447	1167	1630
YOL062C	631	967	1014	568	642	810	754	1137
YNL234W	202	281	221	139	202	184	216	285
YLR467W	2615.69	3771.7	3523.44	1857.92	2517.75	2520.05	2579.07	3540.37
YJL194W	307.996	495.998	400	229	314	268	355.997	379
YOL015W	55	124	64	38	83	56	80	124
YDL070W	2205	4540	2677	1573	3868	2438	2859	3392
YOR241W	510	720	652	356	450	524	500	738
YLR056W	2749	4104	4390	2684	2261	2394	2957	5367
YPR039W	1	1	0	0	0	1	1	1
YMR054W	782	1351	1070	581	799	887	779	1155
YKL110C	485	688	537	338	548	573	534	868
YML100W-A	1	0	1	1	1	3	0	2
YPR070W	323	564	345	191	384	256	308	383
YLR204W	552	809	809	592	520	589	552	1031
YML097C	290	491	367	223	398	340	321	592
YKR007W	332	613	531	346	387	440	445	725
YDL096C	1.016	2.027	0	1.038	6.125	2.035	1.014	6
YHR193C	2912	4313	4190	3082	3313	3996	3022	6216
YBL099W	8763.97	13324	11772	7233.97	12535.9	14189	11172	18262
YJR035W	360	586	468	217	440	402	362	546
YOR126C	235	388	341	217	288	310	241	450
YMR023C	183	246	234	116	222	201	191	283
YOR119C	848	1263	911	571	1001	771	834	1258
YNL196C	4	10	6	0	6	4	8	5
YNL187W	128	172	152	88	97	110	111	203
YMR141C	3	3	0	3	1	2	1	4
YLL014W	330	531	468	213	393	268	456	498
YBL062W	1.023	0	0	0	0	0	1	2.044
YCR061W	344	483	555	264	297	491	418	500
YOR199W	2	0	0	1	0	0	0	0
YPR115W	914	1492	1243	616	1015	1119	900	1206
YHR088W	476	677	521	331	514	407	423	854
YBR017C	640	915	744	412	625	575	597	783
YPR162C	142	240	203	105	182	156	176	269
YGR166W	350	539	395	179	374	304	309	331
YDL161W	629	944	857	541	566	729	671	976
YKL050C	274	398	392	193	247	297	268	445
YJR055W	76	103	84	49	76	44	75	108
YGL099W	506	705	653	401	620	552	548	879
YFL030W	2749	3994	3818	2619	4894	6061	4594	7674
YIL119C	236	534	314	132	386	248	382	293
YPL193W	314	444	362	220	325	269	297	471
YNL005C	1019	1584	1348	794	968	1072	1005	1672
YGL217C	0	0	0	0	0	0	0	0
YJL144W	74	121	139	61	65	120	79	129
YBR012W-B	0	9.152	51.505	9.017	10.006	11.191	0	0
YLR379W	2.029	6.017	2.01	0	0	2.011	2.018	3
YJR139C	1842	2715	2022	1118	1996	1709	1731	2810
YBR133C	460	776	651	425	434	464	531	814
YBR162C	5120	8217	7096	4332	5464	6381	5635	9630
YNL331C	183.296	243.573	232.084	139.019	166.257	171.184	159.89	264.079
YJL079C	6200	10260	8885	5794	7281	9430	7079	9891
YGL019W	533	813	789	511	555	783	633	1095
YGR201C	260	353	316	242	229	270	269	503
YNL172W	531	757	549.955	288	451	410	384	583
YNL058C	972.972	1647.9	1472.94	928.945	571.943	680.828	753.979	1238.96
YPL160W	1977	2720	2218	1178	1934	2025	1764	2432
YOL083C-A	1	0	0	0	2	2	0	0
YNL023C	389	570	507	308	356	440	416	676
YDR214W	984	1403	1418	958	922	1011	1008	2015
YLR222C	760	948	756	396	734	535	665	888
YLR295C	1718	2600	2535	1632	1968	2543	2250	3594
YER175W-A	1	8	0	2	6	2	2	0
YHR168W	263	367	336	217	218	292	226	404
YOR064C	344	510	461	305	439	520	453	847
YOR159C	159	228	225	150	183	192	191	353
YOL081W	719	1267	743	360	922	606	610	792
YOL036W	1084	1662	1456	754	1144.95	1310	1152	1584.99
YGL148W	1148	1621	1439	1056	1207	1427	1171	2021
YOR031W	262	199	259	217	132	185	144	334
YBR282W	369	526	558	335	338	377	345	625
YDR194C	1610	2379	1655	1015	1716	1411	1387	1975
YOL114C	55	100	95	53	49	65	49	70
YGR084C	696	947	910	559	646	700	692	958
YNR030W	413	706	521	266	522	389	410	589
YAL037C-A	0	2	0	1	0	0	1	0
YML007C-A	3	6	1	0	4	1	2	3
YBR018C	31268	49561	41779	25903	35637	39367	40475	66333
YKL076C	56.629	84.277	69.537	53.132	56.415	67.236	53.388	87.645
YDR466W	702	1041	859.944	450	695	790	652	930
YFR045W	317	482	439	238	329	362	379	542
YIL002C	484	688	543	303	492	430	503	604
YGR159C	4379.95	4412	3788.99	2744.97	4003.95	3497	3321.98	6405.98
YLR369W	539	791	686	394	586	560	516	780
YFR032C	43	24	7	19	27	20	24	25
YNL118C	1226	2034	1369	764	1334	1209	1197	1615
YGL228W	1340	2086	1834	978	1439	1601	1460	2092
YJR117W	1396	2165	1533	766	1381	1141	1268	1700
YBR196C-A	5	11	6	2	14	1	5	12
YBR196C-B	7	18	3	2	9	8	6	12
YIL030W-A	27.755	40.202	41.97	31.019	34.021	40.42	34.23	59.176
YLR357W	898.975	1381.98	1040	600	951	969	867.961	1271
YER127W	434	466	461	298	359	387	341	600
YBL015W	1949	2981	2606	1148	3556	5057	2789	3567
YLR017W	488	631	607	411	452	465	426	854
YHR110W	700	937	1008	622	748	838	712	1197
YBR041W	684	1193	888	436	855	670	684	928
YOR394W	16.857	34.431	23.528	4	16.847	13.294	10.344	16
YCL068C	0	0	0	0	0	0	0	0
YDL220C	127	279	217	112	133	186	163	240
YDL039C	302	289	273	94	258	242	213	215
YKL202W	4.065	7	18	3.066	7.163	6	5	16.146
YGR122C-A	6.593	10.912	4.232	3.163	16.475	5.726	0	9.752
YOR264W	376	594	484	320	333	363	437	777
YNL042W-B	4	5	8	1.092	4	4	3	2.119
YBL029C-A	236	472	373	195	248	350	314	492
YOR008W-B	13	14	16	10	11	14	8	22
YOR366W	19	19.961	17	8	16	18	12	22
YNL275W	248	400	277	169	290	255	224	326
YAR015W	669	972	958	626	537	813	658	1168
YOR384W	2	7	4	3	14	8	14	28
YLL051C	409	600	464	239	387	446	451	678
YDR427W	720	1466	734	419	1142	579	669	1049
YLR079W	1045	1505	1340	907	880	1339	1025	2031
YLR408C	56	94	90	52	71	63	70	101
YMR093W	616	748	653	408	639	538	528	902
YBR221W-A	1	0	0	0	0	0	1	1
YDR079W	300	528	358	227	292	294	318	505
YMR268C	137	257	162	86	195	156	153	192
YOR169C	0	0	0	0	3.026	0	0	0
YML070W	1557	2444	2089	1173	1741	2104	1566	2243
YHR175W-A	8	56	14	15	41	17	12	25
YPR072W	693	1145	875	435	737	721	691	1019
YMR108W	3399	4992	4698	3043	3467	4304	3820	6914
YCR091W	497	822	716	355	443	625	501	641
YER062C	2071	2391	2390	1774	1770	2040	1750	3162
YDR244W	604	877	771	435	568	554	584	838
YER189W	88.487	127.902	100.345	112.073	89.398	104.635	96.254	98.284
YJL009W	0	0	2.049	0	0	0	1	1
YDL137W	3181	4869.19	4550.34	2886	3613.6	4003.18	3887.59	6532.6
YGR271W	487	826	530	269	558	423	443	580
YDR233C	3430	5233	4431	2570	3599	3727	3893	5763
YGR071C	248	508	214	107	380	171	245	296
YCR106W	54	120	69	32	109	93	96	165
YBL100C	3.028	2.009	2.018	2.029	14.082	2.01	3.026	2.003
YER109C	459	666	696	353	487	627	537	700
YDR489W	151	202	184	106	115	109	144	226
YPR049C	384	605	387	207	410	302	330	490
YDL057W	213	287	238	115	175	179	175	244
YPR014C	2	0	0	0	0	0	1	1
YGR257C	397	537	518	349	383	422	447	674
YEL045C	7	17	19	3	3	7	11	14
YPL235W	860	1306	1082	566	850	982	819	1250
YLR122C	37.989	46.264	33.455	7.296	22.241	29.856	29.257	32.335
YLR155C	0	0	0	0	0	0	0	0
YBL087C	1699.22	2126.14	2176.19	1556.97	1675.27	1874.27	1799.22	3085.93
YJL132W	353	545	534	243	283	344	295	424
YGL190C	559	1130	689	337	784	610	590	791
YBR110W	494	955	707	341	749	502	621	870
YDR144C	286	471	408	270	307	287	380	569
YFL046W	259	412	360	215	282	291	277	479
YOR103C	188.977	497.997	185	122	379	151	205	296.993
YKL137W	370	603	611	341	443	439	495	698
YDR447C	2177.04	2618.14	2931.18	1695.67	2196.74	2313.15	2492.13	3797.55
YGL009C	9172	17808	15213	8871	10262	15607	10911	23391
YNL324W	0	0	0	0	0	1	0	0
YPR145W	2395.75	3328.34	3448.73	2090.61	2695.35	3161.51	2998.27	4450
YJL063C	731	1119	1071	716	718	908	732	1387
YMR149W	948	1548	1384	863	1022	1222	1145	1832
YPL021W	0	0	0	0	0	1	0	1
YIR010W	519	712	709	379	507	610	586	823
YDR331W	392	593	448	234	420	362	414	547
YJL114W	0	9.782	0	0	2.684	2.773	0	0
YKR044W	235	356	344	216	268	298	301	480
YLR433C	459	732	577	326	469	450	457	661
YMR068W	143	203	222	132	142	180	131	219
YLR157C-B	0	16.74	0	0	16.062	0	0	20.088
YNL164C	185	289	249	162	219	198	223	382
YER032W	617	1085	918	487	572	623	683	1013
YJR070C	836	1039	1043	751	831	907	930	1592
YGL005C	680	1112	850	443	969	654	964	1297
YHR043C	808.034	1220.32	1129.81	663.164	883.788	857.975	871.545	1468.41
YDL111C	425	590	499	314	464	419	394	625
YMR133W	3	5	6	3	2	3	7	10
YPL007C	224	404	296	144	344	196	259	315
YKL159C	104	156	121	62	108	89	102	141
YDR507C	1135	1738	1455	679	1237	1146	1174	1546
YKR075W-A	2.048	0	0	0	3.183	0	0	3.018
YLR138W	1021	1484	1277	683	873	1004	971	1406
YBR101C	790	1062	930	583	818	735	813	1353
YLR396C	306	474	307	187	328	240	299	411
YBR245C	680	1088	864	472	786	743	643	955
YJL216C	224	299	255	149	197	198	181	310
YBR210W	194	295	245	139	200	159	185	271
YPL103C	158	322	234	125	164	173	176	299
YIL103W	278	315	307	154	276	225	241	364
YIL152W	145	258	238	156	144	247	187	297
YML045W-A	0	0	0	0	0	0	0	0
YJR096W	413	639	581	348	377	565	364	597
YAL010C	198	336	257	146	212	196	238	300
YGR143W	2033	2983	2417	1355	1764	2020	1678	2274
YGR112W	374	606	592	401	377	515	419	626
YLR256W	1125	2314	1240	632	1793	1006	1142	1418
YHR174W	13033.6	17668	18712.6	14036.7	13075.5	17049.7	14883.8	29270.4
YOR012W	16.686	22.66	13.7	7.684	14.88	25.381	23.856	16.623
YIR001C	329	581	484	299	406	492	366	612
YDL213C	474	709	641	560	408	442	442	988
YDR442W	1	1	0	0	0	0	0	0
YDR317W	6	24	8	4	10	1	6	8
YDR478W	82	95	83	54	71	55	77	134
YKL097C	7	3	0	1	4	4	1	1
YOL164W-A	0	2	0	0	0	1	1	0
YNL106C	361	553	454	180	364	363	353	432
YOR378W	3	7	8	5	7	7	4	0
YFR015C	1751	3080	2799	1313	1746	2992	1829	2362
YMR230W	1792.07	2232.66	2308.94	1282.15	1905.61	1726.9	1930.26	2857.61
YIL092W	121	194	182	86	148	124	141	235
YAR009C	4528.46	7492.59	4936.88	2483.04	4712.23	4096.77	3929.6	4816.69
YLR321C	379	589	524	324.973	380	463	412	661
YBR004C	198	429	190	89	370	115	210	213
YGR052W	122	189	144	78	158	199	131	142
YJR161C	589.587	944.859	753.36	356.023	499.075	552.48	547.883	728.803
YOR278W	158	255	225	169	189	205	223	283
YNL085W	826	1449	824	400	1181	714	806	857
YGL061C	123	240	152	93	194	134	152	224
YPL210C	979	1568	1119	583	1124	888	932	1322
tS(AGA)G	1	1	1	0	1	1	2	1
YOR087W	613	1073	823	447	743	712	748	1045
YGL234W	1049	1587	1622	992	991	1191	1138	1982
YOR347C	273	400	387	226	237	274	229	385
YPR093C	111	172	223	152	108	155	149	280
YAL029C	795	1315	910	437	826	659	745	928
YOL155C	630.26	1083.81	952.69	492.922	433.544	979.368	528.891	800.676
YDR421W	303	416	393	183	309	281	309	488
YGR186W	1392	1913	1716	947	1398	1717	1299	1931
YDR294C	1002	1602	1377	768	1051	1192	1076	1476
YHR135C	1285	2088	1895	1074	1270	1588	1381	2207
YDR015C	0	0	0	0	0	0	0	0
YBR181C	3729	4971.2	5236.64	3552.21	3823.53	4081.05	3873.17	6924.77
YOR078W	552	675	508	359	603	472	472	835
YOR243C	725	1028	826	506	753	692	662	1018
YMR165C	612	878	742	417	613	738	591	835
YCR005C	3231	3676	2847	867	2386	2571	1779	1919
YLR163W-A	0	0	0	0	0	0	0	1
YPR055W	357	627	351	155	442	260	307	373
YIL016W	338	396	438	308	307	400	310	581
YLR032W	449	633	520	263	429	383	347	539
YDR114C	1	1	1	1	1	1	0	1
YLL030C	0	0	0	0	0	0	0	0
YDL185C-A	1	0	0	0	3	0	0	0
YLL065W	0	0	0	0	0	0	0	0
YPR046W	44	69	68	55	53	53	75	134
YBR099C	7.306	20.434	6	1	15	6	7.293	6
YBL027W	4599.87	5906.15	6242.29	4368.98	5146.18	5637.26	4688.68	9330.67
YOL060C	1038	1589	1347	805	924	1186	960	1517
YIR018C-A	1	2	0	0	0	2	1	1
YOR382W	127	169	195	139	162	228	147	334
YNL232W	388	559	492	363	432	371	429	784
YDL076C	310	494	430	212	305	364	316	518
YOR225W	0	3	2	2	2	0	0	1
YDR120C	580	754	686	467	547	515	557	993
YLR465C	20	41.957	26.509	9	14.202	24	26	17
YJL192C	569	955	709	417	587	551	612	870
YEL020C-B	3.01	2	1.003	6.019	6.02	0	3.006	7.025
YLR054C	30	25	31	10	15	22	12	32
YLR009W	915	1198	999	706	930	897	799	1437
YKL116C	470	679	546	314	424	457	464	691
YBR209W	0	0	0	0	0	0	0	1
YOR292C	195	331	303	160	232	288	249	363
YLR423C	176	311	206	130	201	176	173	258
YDR278C	0	0	0	0	0	0	0	1
YLR105C	348	501	430	264	298	345	327	562
YML091C	2174	3872	2140	1196	4142	2410	2730	3362
YHR191C	64	102	97	85	80	77	82	122
YDL098C	104	150	117	83	110	104	87	162
YLR202C	46.722	64.255	50.63	34	41.978	44.313	40.933	62.687
YLR299C-A	0	0	0	0	0	0	1	0
YKR005C	93	149	135	62	97	160	88	169
YMR143W	2568.77	3376.5	3486.92	2141.41	2955.01	2660.84	3128.4	5170.83
YCR063W	48	71	60	32	34	45	53	63
YNL189W	1547	2383	1892	1088	1523	1585	1547	2292
YFR024C-A	1099	1752	1538	993	1113	1386	1118	1863
YCL047C	162	231	216	144	157	195	171	251
YGL122C	1307	1808	1664	960	1271	1647	1228	1781
YDL018C	188	360	322	166	237	216	270	346
YOR120W	9747.84	16384.9	14289	9875.91	10637.5	14763	11854.9	21000.9
YPR160W	4956	8139	6146	2711	5810.94	7395	4898	4837
YBL060W	302	381	334	178	325	252	300	402
YDR065W	86	152	101	81	122	77	115	151
YBR019C	64454	103003	85144	51021	75512	80732	77210	120141
YKL056C	4205	5697	6091	3500	4734	5072	5475	7472
YKL065W-A	46	49	59	31	74	79	58	85
YGR160W	11.054	2.004	4.009	9.034	10.053	1.001	5.016	15.02
YDL163W	0	0	0	0	0	0	0	0
YPL068C	273	371	291	136	256	215	203	342
YJR057W	226	332	332	214	251	274	269	441
YGL211W	406	592	579	363	387	456	417	720
YFL032W	2	4	1	3	0	2	2	7
YPL195W	641	1166	712	325	834	588	668	841
YCL044C	297	465	456	254	232	376	353	481
YAL059W	218	280	331.981	207	211	217	229.995	373.972
YNL007C	2108	3306	2801	1588	2171	2636	2015	3045
YPL148C	104	169	162	83	143	110	127	156
YJR137C	831	1277	1074	444	847	848	896	918
YMR021C	246	356	305	177	230	279	251	331
YMR074C	424	681	633	380	499	480	554	630
YGR203W	136	223	198	149	110	162	130	247
YJR039W	297	564	372	164	341	297	271	411
YDL158C	6	33	14	15	43	13	12	34
YOR104W	262.539	429.062	387.255	231.267	265.023	221.685	270.121	410.92
YFL009W	612.326	947.045	671.442	386.114	603.51	710.048	609.776	856.646
YLR297W	120	235	197	76	126	137	155	162
YLR279W	3	3	0	0	0	1	1	2.005
YDR216W	2217	3823	2417	1048	2750	2243	2149	2427
YIL120W	143	233	216	94	149	143	139	243
YBR030W	341	502	437	282	427	371	393	573
YPL162C	202	354	304	165	193	268	285	348
YGR095C	283	384	298	216	266	298	300	470
YCL027W	62	101	94	54	82	88	52	28
snR3	5	2	1	1	0	3	2	3
snR5	16	26	16	3	20	16	9	19
snR4	47	52	56	24	32	35	26	38
snR6	0	0	0	0	0	0	0	0
snR9	23	28	29	13	22	16	24	10
snR8	34	37	45	20	21	54	26	37
YHR029C	246	368	330	189	271	295	317	442
YIR021W-A	0	1	0	1	0	1	0	1
YAL033W	139	209	210	108	164	147	212	289
YNL130C	559	962	676	378	678	534	584	837
YNR036C	1089	1586	1688	1115	1060	1426	1076	1951
YNR049C	225	339	318	227	212	295	299	458
YDR192C	255.933	358	370.983	209	242	324	250	418
YOL112W	588	1028	858	494	656	638	605	969
YML109W	458	673	604	308	481	530	418	634
YOL083W	414	741	545	312	497	502	457	720
YNL251C	547	956	923	475	611	855	656	847
YBR266C	3.076	0	0	2.016	1	0	2.015	3
YBL004W	564	883	572	339	691	432	518	767
YER145C-A	2.001	1	2.002	3.004	4.003	3.004	1	0
YBR164C	424	684	561	307	502	427	477	659
YHR074W	1161	1754	1522	786	1238	1171	1125	1669
YDR464W	699	1054	829	435	757	729	642	978
YFR030W	611	852	877	345	650	693	660	774
YJL146W	306	511	446	255	346	345	357	459
YKL078W	225	218	229	126	165	162	185	285
YIL055C	380	570	476	269	300	374	308	539
YPL053C	1101	1768	1526	778	1234	1131	1196	1560
YLR351C	681	1119	983	642	647	806	676	1206
YEL009C-A	1	2	0	1	5	1	3	2
YJR111C	221	307	266	162	216	231	201	361
YIL030C	927	1506	1063	481	1124	832	886	1167
YER125W	1430	2213	1852	867	1542	1693	1523	1693
YER152C	548	932	782	500	546.996	694	512	992
YLR015W	220	290	273	157	233	243	218	388
YHR116W	170	238	244	150	137	151	161	286
YPL259C	440	735	514	293	558	489	397	644
YOL100W	772	1257	882	459	853	769.992	750	1016
YOR039W	490	689	543	312	501	477	501	798
YDL037C	130	96	81	28	112	68	80	66
YLR334C	2	1	1	0	2	1	0	0
YHL043W	2	4	1	0	1	3	4	4
YOR364W	5	7	6	4	4	2	5.843	6
YOR386W	339	584	475	234	310	321	336	428
YAR042W	860	1287	1119	564	764	948	780	1066
YPR198W	454	850	512.966	267	541	335	430	656
YHL038C	243	405	302	179	250	273	213	381
YLL053C	127	162	131.536	64	377	400.548	369.131	457.603
YDR425W	260.977	557	302	134	335	266	272	334
YOR331C	19.099	2.003	0	8.044	16.095	1.003	4.022	20.06
YML076C	410	644	465	288	501	419	402	546
YKR060W	142	203	165	93	134	124	143	277
YHR094C	8.165	9.196	10.223	5.104	5.093	3.07	1.012	7.18
YER069W	2423	3406	2856	1372	2042	2367	2068	2526
YMR091C	560	788	646	418	566	643	582	933
YER012W	967	1582	1302	815	1005	1114	1114	1846
YHR098C	811	1381	1018	485	974	828	812	1060
YDL135C	392	648	554	345	439	426	444	686
YCR093W	935	1750	1005	459	1128	812	893	1065
tP(UGG)O3	0	0	0	0	0	0	0	0
YGR273C	1	2	0	0	0	0	0	0
YGL080W	354	507	366	178	389	294	368	462
YBR069C	3557	4581	4204	2350	3129	2748	3357	5278
YGR077C	389	679	465	288	463	423	453	561
YCR104W	2.431	0	0	0	1.153	2.414	1.465	0
YDR040C	999.172	1304.68	1303.38	747.227	726.288	812.502	959.078	2302.73
YPR012W	11	15	20	9	6	11	33	30
YGR255C	683	1102	926	461	647	729	590	852
tM(CAU)M	0	0	0	1	0	0	1	1
YDL051W	756	1003.97	1002	643	750.986	758.991	814.983	1467.96
YBL102W	442	793	663	418	502	648	575	924
tM(CAU)P	2	3	2	4	0	2	0	4
YPL237W	1808.97	2470	2114	1410	1736.99	1818.99	1738.99	2919.98
YLR120C	963	1403	1293	568	820	992	806	992
YCL001W-B	2	2	3	4	2	2	0	1
YCL001W-A	0	8	5	2	1	0	0	3
YNL068C	590	885	759	407	487	531	499	707
YJL169W	2.04	2	1	0	0	1	0	0
YBL002W	1328	2174	1919	1345	1743	1740	1798	3132.29
YDR146C	1120	2092	1492	860	918	1099	822	1420
YBR112C	1441.74	2292.47	2071.97	1019.15	1530.18	2007.65	1605.55	2242.41
YBL081W	382.146	483	480.395	272.542	388	393	381	597
YFL040W	2	3	7	3	6	6	6	6
YNL326C	295	429	387	231	312	369	330	471
YDR337W	584	884	771	483	574	625	613	941
YJL061W	379	638	390	176	505	292	416	497
YPR147C	386	585	531	312	426	375	384	613
YKL131W	2	5.127	0	1	1	1	2	2
YDR441C	397	589	475	350	369	422	432	797
YPL094C	1047	1587	1467	885	1075	1288	1152	2006
YOR101W	676	842	747	556	695	662	799	1499
YER020W	673	1104	1110	686	665	1054	809	1443
YDR231C	481.99	781	779	527.985	536.982	766.994	658.984	1071.95
YJL112W	1177	1719	1452	880	1353	1526	1323	1994
YFL066C	225.288	372.517	251.439	172.337	188.732	272.415	141.567	174.417
YNL193W	414	626	447	271	431	422	408	467
YML058W	1038	1426	1642	972	897	1318	1180	1797
YBR188C	161	230	201	153	137	202	169	313
YLR435W	200	302	267	147	237	183	243	312
YJR076C	1067	1664	1378	910	1117	1293	1061	1820
YKL157W	2454	3794	2794	1562	2738	2810	2232	3159
YBR003W	697	1059	1016	547	666	818	707	1025
YPR129W	803	1290.98	1057.99	691.903	889.923	902	858.991	1353.86
YDL113C	492	863	648	334	531	637	558	716
YMR135C	885.998	1394	1125	679	816	965	870	1463
YGL007W	1	1	2	1	0	1	2	0
YPL005W	278	403	329	160	266	268	257	338
YBR247C	481	591	472	343	446	423	398	746
YLR185W	1616.7	2021.76	2234.19	1428.02	1485.3	1710.61	1533.28	3008.41
YJL210W	507	742	701.987	424.996	516	704	573.992	895.998
YLR398C	833	1345	963	488	901	797	776	922
YIL154C	461	779	657	437	511	685	435	808
YIL101C	833	1310	1338	741	717	1265	853	1396
tT(CGU)K	0	0	0	0	1	0	0	0
YKL004W	860	1213	972	532	856	781	917	1291
YPL154C	5554	8679	7026	4552	5876	6974	5013	9284
YPL101W	439	583	614	388	417	512	464	772
YLR258W	1475	2366	1874	900	1352	1780	1243	1731
YBR178W	1	3	0	2	1	0	3	1
YJR098C	226	310	257	144	173	171	167	261
YHR176W	183	274	262	158	185	229	194	267
YJR018W	5.018	4.025	5.057	2.007	1.006	5.052	3.031	6.013
YMR326C	0	0	1	0	0	0	0	0
YDL244W	73.173	123.668	101.591	69.638	71.67	87.059	55.569	102.538
YDR319C	120	331	197	97	206	130	169	199
YKL095W	275	404	365	211	265	351	287	423
YOL099C	2	0	0	2	3	1.008	0	1
YIL094C	968	1371	1356	842	899	1066	999	2138
YLR451W	498	711	567	302	485	438	496	739
YFR017C	440	844	811	497	427	908	524	853
YLR342W-A	0	3	3	0	4	1	3	0
YIL076W	862	1354	1043	571	879	887	827	1194
YNR077C	0	1.904	1.729	3.876	2.388	0	2.531	0
YOL044W	291	492	343	187	325	253	286	412
YLR323C	163	190	199	148	144	177	183	287
YOR085W	701	1032	969	598	675	753	747	1194
YGR054W	1507	2123	1908	1095	1464	1534	1405	2073
YOR050C	1	0	1	2	3	0	2	1
YNL087W	825	1327	931	551	1035	888	960	1366
YGR114C	0	0	0	0	0	0	0	0
YLR318W	96	209	98	59	174	87	102	130
YBR278W	169	247	294	151	131	222.991	226	322
YNL024C-A	183	267	232	141	219	163	197	294
YDR296W	769	1165	1201	790	742	954	737	1349
YGL232W	290	526	355	201	378	285	336	460
YPR091C	881	1685	1270	613	1122	1104	1032	1365
YGR141W	518	805	821	525	551	577	572	1064
YAR030C	7	24	9	8	9	3	17	21
YGL111W	392	546	455	295	460	375	379	632
YJR158W	0	0	0	0	0	0	0	0
YHR137W	3554	4044	3775	2442.99	2531	2868.99	2738	4905
YFL011W	15	22	33	12	22	20	28	48
YMR198W	333	533	455	256	275	301	332	479
YCR003W	405	730	713	370	476	460	595	705
YMR316C-B	54.991	89	94	49.994	54	85.998	71	86
YMR316C-A	4	6	6	1	5	2	3.266	3
YDR342C	21741.3	38578.9	29637.5	15002.8	27918.2	29304	28938.9	34464.2
YMR163C	224	498	271	150	297	258	252	335
YGR294W	32.705	31.082	19.708	14.587	17.159	24.763	15.003	30.563
YEL008W	3	3	3	3	1	4	3	3
YLL067C	78.588	91.586	74.604	0	90.059	32.946	65.383	50.196
YHR086W-A	0	0	1	0	0	0	0	0
YBR020W	55227	92142	76572	48925	65592	70066	68980	123285
YLR418C	403	632	585	328	451	487	400	713
YDR112W	1	0	0	0	0	0	0	1
YER059W	384	628	488	317	385	420	434	702
YNL076W	526	748	689	349	575	536	571	767
YBL025W	79	108	124	78	102	137	102	156
YOL066C	359	523	512	284	352	468	324	592
YDR126W	123	159	158	76	140	152	140	192
YPL216W	211	328	232	142	225	190	241	287
YOR223W	250	363	323	195	255	272	242	416
YEL022W	433	823	474	242	727	473	489	618
YHR072W	1248	1814.95	1779	1027	1235	1286.99	1176	2042
YOL019W	989	1633	1344	805	974	1083	1046	1781
YLR463C	45.725	62.891	73.291	25.73	29.546	52.284	45.793	70.376
YJL190C	1926.62	2259	2615	1652	1939	1976	2095	3426
YMR218C	323	536	360	180	412	292	334	400
YNL265C	438.997	644	581	341	450.967	510.995	478.997	767.976
YNL230C	120	197	157	116	125	137	134	233
YLL049W	120	209	138	81	135	91	137	189
YHR211W	448.164	652.026	589.52	269.132	384.796	497.945	405.884	608.41
YPR166C	395	644	576	334	477	379	506	710
YJL042W	1200	1996	1718	762	1352	1616	1339	1616
YNL301C	622.638	708.092	846.152	536.296	577.282	530.93	659.431	1146.03
YDR333C	623	923	626	350	701	551	578	801
YMR058W	1590	2785	2387	1675	2842	3773	3352	8730
YDR061W	574	853	773	497	551	631	556	860
YJR112W-A	185	285	204	164	226	236	237	387
YOR290C	1255	1894	1531	751	1367	1278	1172	1623
YKL114C	444	633	612	309	443	441	450	660
YML024W	3585.96	4433.86	4412.82	2928.33	3825.26	3837.85	3451.87	6572.45
YML093W	855	1005	876	564	864	798	728	1232
YHR197W	384	478	319	174	435	224	299	409
YDR276C	1449	2112	2109	1255	1456	1839	1674	2419
YLR200W	192	325	266	163	239	218	246	401
YKR003W	397	639	511	276	350	445	416	483
YLR107W	510	709	492	254	478	372	414	604
YMR321C	32.448	29.998	58.56	20.049	0	37.608	19.857	56.609
YER175C	284	437	372	187	322	376	312	428
YIR012W	715	866	816	527	592	638	580	1038
YDL183C	164	319	253	122	214	196	206	300
YPL278C	125.364	152.235	130.899	62.049	106.852	128.757	93.554	115.457
YMR105W-A	1	0	2	0	0	1	0	1
YMR118C	94	95	79	45	85	87	56	94
YCL049C	913	1465	1362	860	831	939	962	1665
YBL066C	971	1349	1228	662	1217	1260	1201	1516
YGL120C	1090	1252	1068	681	962	878	930	1520
YGR271C-A	247	342	268	172	335	200	261	402
YDR169C	878	1254	1191	690	795	1008	883	1404
YOR057W	344	574	391	213	374	329	352	518
YLR410W-A	115.282	162.453	0	0	81.065	0	35.288	0
YLR169W	4	1	2	3	2	1	1	3
YMR272C	2410	3493	3100	1616	2800.85	3219	2634	3119
YPR108W	1103	1794	1447	838	1205	1192	1178	1657
YKL054C	1756	2699	2309	1387	1646	1944	1626	2858
YGR162W	2087	2693	2380	1315	2129	2050	1854	2637
YDL165W	281	453	390	262	258	349	345	576
YDR520C	276	518	318	185	270	208	252	427
YKL023W	274	433	417	278	273	333	295	526
YJR051W	838	1356	1111	639	891	935	936	1367
YNL009W	251	379	293	172	308	265	233	324
YFL034W	446	698	545	315	509	549	483	688
YKL164C	2412.56	4162.44	3833.11	2616.61	2164.72	2975.78	2949.46	7272.76
YJR135C	79	110	113	56	83	69	85	146
YGL213C	422	661	517	314	521	446.986	446	699
YOR161W-A	0	0	0	0	0	0	0	0
YMR076C	451	878	518	244	629	413	471	575
YOR161W-B	3.458	3.152	0	6.286	0	0	1	1
YJR037W	0	0	0	0	0	0	0	0
YNL027W	534	942	674	409	632.645	574	548	804
YLR291C	386	637	524	277	407	390	364	566
YDR210W	155	196	238	128	149.999	193	153	220.999
YIL122W	413	586	494	286	357	406	372	564
YDL230W	296	451	465	239	235	316	247	394
YJR113C	823.995	1260	1292.99	831.975	797.997	998.998	843.996	1583
YGL075C	170	242	199	136	159	174	170	243
YHR041C	233	344	346	194	287	274	289	432
YIL156W-B	313	403	515	305	275	343	369	601
YIL156W-A	0	4.005	0	0	0	0	1	1.001
YLR416C	4.288	3	2.229	3.251	1	5.269	1	1
YGR097W	1076	1625	1347	620	910	1089	1050	1293
YIL068C	442	791	528	319	522	442	477.986	673
YCL025C	5372.66	7988	7137.03	3723.67	4706.24	5534.67	4972	6763
YNR034W	639	881	779	514	555	734	587	864
YOL085C	0	2	1	2	0	0	1	1
YNL282W	80	141	167	87	83	106	103	165
YBR286W	5951	9538	7666	5234	5853	7609	5570	10241
YGL144C	250	337	276	167	281	234	266	369
YDR190C	1311	1664	1614	1036	1257	1280	1234	2074
YAL031C	487	712	691	359	505	530	511	733
YBL006C	318	453	559	359	373.215	459	459	796
YNL132W	721	946	740	395	671	567	612	881
YBR264C	127	177	185	101	119	138	131	263
YBR231C	219	374	318	227	225	244	234	374
YLR162W-A	3	1	0	0	0	0	0	1
YPL197C	4.014	1.002	1.002	1.003	6.032	2.007	2.006	10.025
YHR076W	477	737	693	458	551	648	561	840
YDR462W	413	604	635	413	353	477	404	785
tP(UGG)Q	0	0	0	0	0	0	0	0
YJL148W	449	492	439	309	389	294	398	736
YIL057C	686	1008	1223	970	534	641	1231	3717
YPL055C	242	400	417	189	198	287	282	472
YLR353W	506	737	659	361	425	430	390	664
YIL020C	130	211	180	126	161	175	147	197
YIL148W	3389.2	4385.4	4502.23	2855.97	3498.72	3796.4	3617.21	6151.27
YNR016C	10033	16434	14854	8033	11936	13521	10726	15948
tY(GUA)J1	1	0	3	2	0	0	0	1
YFR036W	73	100	107	66	80	93	72	157
YER023C-A	3.102	0	2.187	0	3.229	3.366	0	1.012
YHR114W	522	883	601	397	649	539	542	738
YGR028W	413	684	535	344	445	380	434	788
YER150W	670	821	764	473	808	1044	700	1173
YNL279W	38	43	46	28	43	31	33	47
YDR400W	249	396	283	150	221	206	211	350
YDL068W	1	1	0	1.027	1.011	0	1.012	1.008
YOL027C	1310	2022	1703	1041	1474	1680	1215	2092
YPL257W	40	81	77	27	74	59	60	117
YPL120W	114	220	172	79	153	96	129	210
YOL145C	1113	1745	1265	624	1292	1050	1122	1414
YJL099W	347	555	495	255	345	389	374	470
YHR149C	662	1080	965	474	740	776	774	1014
YDR395W	686	1065	701	324	727	527	689	763
YOL110W	294	458	384	289	279	307	320	555
YDR005C	636	1054	786	411	878	646	759	982
YMR311C	1111	1742	1654	1098	1110	1551	1131	2008
YHL041W	2	0	0	0	0	0	0	1
YBL039C	898.751	918.633	866	603	798	744	747	1242.64
YGR188C	147	276	221	120	179	174	192	255
YOR362C	1356	2052	2043	1219	1274	1803	1439	2504
YPR106W	291	513	349	149	307	290	305	416
YLR126C	197	317	273	191	239	265	194	464
YDL053C	520	875	703	439	588	606	546	968
YML074C	1389	2253	1926	1435	1737	1897	1376	3008
YKR062W	417	614	593	356	415	461	407	670
YBR235W	549	1001	741	343	584	595	605	847
YER010C	332	506	479	285	343	390	375	567
YML003W	64	125	72	47	79	45	74	75
YMR097C	309	522	403	227	358	407	361	504
YDL133W	434	692	515	318	406	467	439	608
YNL330C	724	1088	952	581	798	853	726	1167
YGR228W	19.356	5.066	3.085	3.133	11.231	7.211	8.111	25.507
YHR096C	1219.84	1410.82	1140.78	793.896	1072.91	1109.93	956.988	2396.85
YBR008C	306	466	346	210	331	300	338	497
YDL035C	724	1141.99	913	492	782	758	752	1084
YMR253C	235	358	350	208	257	276	238	413
YCR102C	72.896	101.601	89.867	78.721	49.894	85.395	103.511	209.869
YJL127C-B	257	424	400	141	381	336	401	379
YOR257W	294	465	444	306	375	413	372	641
YGR002C	394	533	448	288	378	408	359	535
YEL041W	249	374	339	216	308	332	320	722
YGR075C	57	134	71	38	95	49	90	104
YGR253C	1351	2077	1773	1156	1367	1561	1296	2277
YDR510W	895	1408	1369	982	962	1282	1017	1852
YEL014C	0	0	0	0	0	0	0	0
YPL050C	952	1598	1358	764	1033	1025	989	1715
YMR166C	155	293	241	151	147	186	191	267
Q0115	0	0	0	0	0	1	1	0
YPR045C	328	676	450	293	449	361	325	580
Q0110	0	1	0	0	0	0	1	0
YPL231W	9069	14217	12037	6081	11043	13768	9634	13089
YLR148W	310	601	367	166	400	237	299	405
YMR137C	199	313	220	122	263	161	215	300
YDL082W	1893.37	2428.39	2432.92	1651.33	1887.36	2111.78	2012.97	3211.85
YKL155C	602	852	626	378	615	557	553	812
YBR162W-A	365	547	646	358	383	498	557	733
YFL042C	570	986	856	477	652	865	615	994
YBL083C	113.023	149.539	167.311	107.741	107.679	139.592	140.115	213.862
YDR148C	5006	7777	6837	4059	6956	8405	6338	9805
YHR052W-A	80.882	88.533	73.937	79.076	64.057	33.756	45.139	136.136
YPL096W	266	450	403	204	303	319	329	458
YDR335W	873	1455	1006	567	1055	941	837	1173
YPR141C	235	458	260	157	284	187	260	293
YJL067W	2.02	0	2.008	1.018	1.004	1.006	3.02	0
YMR039C	663	990	835	551	667	844	564	1074
YIL058W	6	2	6	2	2	3	5	8
YNL320W	215	294	250	159	225	204	209	306
YPL078C	4379	6297	5439	3346	5858	6454	5407	8424
YCR095C	272	414	275	186	371	256	303	384
YLL011W	607	656	593	427	550	461	507	809
YCR077C	1453	2582	1895	1033	1790	1782	1509	2103
YLR437C	136	175	165	129	106	123	116	225
YFL064C	147.496	100.941	176.184	155.977	80.059	110.865	120.985	167.522
YNL191W	190	235	197	114	169	169	156	190
YDR237W	557	899	853	504	591	686	737	923
YJL110C	496	828	653	300	597	487	468	692
YKR048C	1422.81	2379	1947	1210	1555	1836	1372	2382.9
YBR001C	575	894	718	394	537	671	516	767
YPL003W	248	342	314	204	180	285	205	369
YKL108W	250	379	331	191	263	326	266	397
YGR110W	181	284	239	143	195	231	227	354
YJR074W	359	505	458	286	407	500	380	696
YPR127W	561	882	757	494	622	737	596	1002
YIR028W	12	11	14	9	11	9	7	18
YAL012W	836	1246	1154	552	870	1094	754	920
YMR288W	447	613	517	260	428	439	420	591
YIL156W	440	672	540	267	434	468	407	554
YBR241C	830	1192	1153	709	731	1122	795	1259
YHR063W-A	3.03	0	1.005	1.008	1	1.006	0	1
YJL212C	20	39	30	20	18	21	13	58
YPL156C	397	558	374	172	412	293	333	435
YNL312W	573	877	899	543	659	734	698	1051
YLR187W	268	395	300	184	252	253	190	345
YDR099W	3032.97	5549.42	3942.39	2377.43	3669.94	3703.94	3149	5058.78
YKL133C	275	477	345	156	274	264	261	427
YLR400W	0	1.005	0	1	0	0	1	0
YHR170W	1071	1256	1128	730	1061	849	858	1634
YDR259C	121	251	180	105	121	93	110	190
YKL068W	633	913	816	488	634	652	719	1079
YOR032C	41	92	54	28	94	72	83	68
YKL093W	1071	1522	1490	954	1190	1561	1149	1761
YMR002W	1822	2656	2627	1868	1820	2246	1672	2707
YLR145W	142	239	212	150	150	173	172	266
YLR261C	111.961	217.782	190.122	123.453	148.265	156.822	134.294	261.786
YDL246C	160	0	91.453	86.277	125.116	74.306	52.556	174.091
YER081W	454.947	662.478	568.921	344.473	409	504.918	381	670.919
YPL178W	499	758	635	417	559	537	589	824
YMR172C-A	0	0	0	1.029	0	0	0	3
YPR202W	137.32	281.098	89.908	25.537	255.303	69.66	135.33	120.412
YIL096C	151	213	167	118	224	154	126	276
YOL046C	0	1.003	0	0	0	0	1.015	0
YFR011C	637.972	1001.98	806	505.909	933	830	765	1366.96
YIL074C	530.541	726.522	655.079	377.527	544	573.082	496	775.081
YGL173C	1976	3237	2495	1167	2223	2265	1917	2614
YHL008C	363	654	549	280	431	519	380	510
YLR457C	197	282	269	171.966	207.941	230	248	340
YNL249C	170	196	180	95	139	158	159	207
YGR056W	484	792	629	313	572	496	521	705
YGL065C	371	715	406	311	540	355	429	535
YOR052C	589	917	788	489	571	746	599	954
YGR116W	1542.98	2513	1717	902	1806.99	1611	1553	1992.98
YOR343C	33	50	44	21	28	26	36	54
YGL230C	10	17	7	6	8	10	6	6
YOL159C	124	256	159	86	163	107	123	165
YBR185C	448	732	507	265	473	371	439	594
YOR010C	84	138	105	63	103	84	80	104
YDR290W	0	0	0	0	0	0	0	1
YDR019C	194	296	249	194	155	228	158	372
YBR150C	379.399	680.97	444	267.391	518.369	354.29	469.167	595.599
YIR042C	129	209	205	98	70	73	109	210
YFL031C-A	0	0	0	0	0	1	0	1
YER119C	401	713	665	385	416	505	448	702
YMR196W	2093	3264	2672	1410	1992	2647	1919	2611
YMR161W	310	490	443	287	308	377	324	546
YDR499W	366	520	441	222	413	317	360	469
YKL068W-A	107	111	111	78	104	86	98	130
YJL133C-A	536	466	495	333	296	379	290	609
YHL046W-A	1	0	1.031	0	0	0	0	2
YDL215C	5326	9390	5941	2525	5870	4577	4110	4592
YJR120W	98	106	130	29	65	144	115	107
YLL061W	243	339	321	160	224	288	248	362
YDR110W	307	482	341	221	343	319	314	509
YDR419W	291	442	407	215	340	309	337	498
YOR221C	652	875	775	397	684	787	653	863
YPL214C	414	680	588	337	439	492	470	671
YBL108C-A	15.416	32.04	29.652	18.666	17.719	18.125	31.028	45.895
YGL165C	1	4	5.039	1.008	0	3	0	1.003
YOL064C	313	422	397	250	299	346	320	481
YBL023C	688	1058	862	477	577	608	592	743
YOR274W	322	441	413	226	320	352	311	509
YOR329C	796	1344	1097	564	823	1046	820	1109
YLR005W	550	840	777	421	525	613	585	932
YDR124W	38	81	53	22	48	45	42	86
tI(UAU)L	0	1	1	0	0	2	1	0
YNL267W	741	1053	874	477	770	701	699	1023
YBR134W	1	1	0	1	0	0	0	0
YLL047W	2	0	0	0	0	2	1	0
YLR461W	0	6.869	3.824	9.785	0	7.192	0	6.778
tI(UAU)D	2	0	0	0	1	1	0	0
YLR050C	245	347	391	209	186	229	232	422
YOR124C	794	1257	914	433	910	767	686	933
YDR067C	156	255	181	95	173	116	182	249
YMR056C	420	573	616	302	426	464	380	519
YHR032W-A	51	43	41	31	35	46	38	86
YJL044C	480	807	539	341	581	426	457	674
YPR164W	368	586	374	199	435	365	377	458
YEL060C	5094	8492	7163	3649	5036	7403	4776	7698
YHR195W	484	740	650	401	445	611	496	810
YLR101C	13.143	18.18	21.08	7.121	9.102	8.129	16.181	23.124
YBL107W-A	3.232	11.6	2.484	3	3.306	1.28	1.084	6.255
YML026C	2719.94	3609.1	3839.35	2521.71	3309.4	2961.68	3550.76	5310.39
YPR066W	109	144	150	99	86	133	114	154
YDR073W	214	349	300	199	256	240	247	456
YDR229W	454	734	637	386	536	671	522	782
YDL181W	1245	1767	1705	1131	1579	1899	1423	2726
YBR022W	148	217	217	106	139	136	161	222
YER177W	4624.03	6974.45	6745.53	4744.57	4684	6563	4664	9430.15
YML048W	2316	3409	2978	1848	2354	2827	2558	3976
YBL064C	3629	5350	5060	3408	3827	4986	3913	6922
YIL045W	290	493	284	181	293	331	259	398
YKL221W	26	37	30	20	18	22	14	35
YGL126W	340	524	520	349	320	368	366	620
YLR167W	9753.77	12121.7	13194.1	8468.64	9994.26	10342.2	10487	18032.4
YMR270C	322	487	421	238	390	377	353	561
YLR293C	2072	2873	2799	1850	1900	2298.78	2033	3703
YLR228C	410	645	485	293	385	414	461	588
YJR053W	117	160	136	77	121	140	138	150
YJL171C	853	1435	1321	635	868	1015	753	1092
YDR374C	1	7	5	2	7	5	1	6
YKL021C	468	640	504	287	465	417	427	714
YDL167C	572	705	592	344	558	476	521	734
YLR388W	1060	1344.37	1383	925	1038	1161.35	1153	1813.32
YLR373C	442	887	561	241	622	410	549	691
YKR001C	1631	2685	2088	1175	1998	1822	1719	2358
YKR054C	462	710	517	294	478	418	355	670
YIR034C	284	517	473	327	340	420	312	648
YGL013C	516	846	526	313	582	427	479	750
YJR068W	472	686	514	350	472	521	470	856
YGR207C	613	942	863	543	579	691	613	1085
YDR212W	1224	1791	1514	866	1290	1294	1243	1767
YNL052W	2592	3857	3756	2506	4139	5326	4102	7337
YGL188C	329	456	376	221	406	423	401	681
YNL025C	155	316	198	101	178	147	185	221
YGR121W-A	6	11	1	6	4	7	6	13
YGR091W	196	288	258	158	182	164	198	354
YDL232W	68	104	120	94	80	102	106	126
YPL119C	457	594	473	323	413	467	402	617
YLR242C	51	142	66	42	113	55	74	86
YMR031W-A	1	0	1	0	0	3	0	0
YJR148W	938	1382	1307	762	752	1070	793	1350
YJR082C	204	378	314	204	257	332	282	471
YOL087C	1225	2027	1654	874	1394	1581	1239	1716
YNL134C	4747	6581	5818	4384	5401	6559	4992	9598
YAL037W	43	69	79	33	44	58	38	70
YGL146C	314	456	467	298	384	382	425	761
YCL075W	0	0	0	0	0	0	0	0
YBR262C	634	844	884	620	608	749	722	1283
YPL199C	250	386	353	228	225	255	265	431
YML101C-A	8	7	10.354	8	6	3.156	6.314	13
YFL036W	1445	2098	1666	827	1504	1529	1332	1549
YDL209C	189	255	219	150	160	195	209	300
YIL051C	1084	1654	1235	882	1030	1141	1019	1540
YPL057C	1053	1827	1337	727	1356	1169	1266	1992
YNR010W	97	139	132	53	82	89	97	109
YDR365C	866	1077	981	618	785	776	768	1365
YLR308W	5	8	9	2	4	3	3	1
YNL169C	1192	1842	1564	894.842	1568.92	1713.94	1407.95	1697.88
YFR034C	475	640	601	377	449	540	426	799
YHR070W	299	445.906	363	248	297	332	303	482
YDR460W	354	553	472	257	360	388	317	519
YNL112W	2926	2314	2210	1600	2254	1804	1830	4039
YHL047C	315	446	477.969	225	299	349	332	704
YOR360C	674	1065	642	317	921	527	602	799
YOR335C	2315	3175	2743	1365	2370	2471	2271	3218
YDR354C-A	0	0	0	0	0	0	0	0
YKL100W-A	0	0	0	0	0	0	0	0
YGL251C	164	254	212	113	216	200	176	294
YER156C	1129	1658	1457	975	1089	1290	1071	2089
YPL255W	227	405	378	235	278	291	273	428
YOR095C	443	608	473	299	531	407	449	734
YEL038W	477	660	699	460	435	630	520	910
YCL014W	560	946	713	379	526	513	491	700
YOL025W	231	478	287	164	302	244	247	315
YPL208W	363	511	430	220	392	391	390	496
YOL147C	411	585	625	409	385	549	482	816
YNL280C	924	1439	1250	743	749	905	890	1811
YDR007W	5393.44	8030.19	8839.1	4951	812.863	993.901	867.964	1586.96
YIL160C	357	534	526	373	217	361	288	710
YPR089W	651	1195	756	392	879	620	624	809
YBR233W	284	479.992	384	265	321	337	296	570
YPL122C	298	474	307	154	370	273	299	384
YKL104C	2360	3938	3078	1688	2279	2366	2016	2952
YMR313C	530	828	660	364	573	533	497	738
YGL179C	211	307	249	141	165	246	204	287
YGR120C	149	241	176	101	157	132	143	242
YML001W	827	1228	1036	638	877	839	950	1256
YLL028W	503	731	691	353	469	588	443	591
YER016W	292	542	441	282	408	368	353	568
YHR061C	280	445	481	265	239	407	336	507
YDR438W	165	258	193	109	198	141	169	247
YNL211C	42	86	40	16	59	28	55	36
YLR124W	1	3	2	1	0	1	1	2
YML058W-A	18	18	23	8	9	9	11	12
YLR026C	398	667	585	401	455	505	439	770
YJR065C	1704	2623	2348	1348	1649	2183	1617	2548
YDL131W	1039.51	1502.76	1433.7	868.891	1107.23	1302.88	1010.02	2047.44
YMR095C	32	48	56	19	23	24	22	39
YER138C	2325.96	3412.11	2719.71	1405.62	1579.99	2141.28	2019.78	2708.59
YDL033C	121	197	183	109	100	108	143	263
YMR255W	426	694	608	379	421	521	462	789
YHR209W	392	690	515	251	360	342	338	478
YGL247W	114	139	141	83	127	110	145	205
YCR100C	28	34	23	9	25	39	23	40
YDR516C	2695	3919	3507	2121	2775	3793	2699	4219
Q0130	1	12	1	1	15	4	8	3
YPL233W	205	299	285	167	186	200	215	390
YOR255W	1	5	1	0	0	0	0	1
YOR063W	14441	18306	18781	12351	13779	16690	14588	25848
YOR200W	0	0	0	0	1.03	0	1	1
YGR251W	156	234	176	120	161	180	158	286
YPR047W	353	604	426	240	386	382	351	451
YDR246W-A	14	14	12	13	6	15	10	14
YDR044W	474	693	729	415	461	583	539	748
YEL016C	351	537	508	304	379	381	380	615
YAL027W	152	240	213	120.652	198	188	174	272
YKL153W	19.069	9.017	15.036	18.072	29.102	18.044	13.038	50.088
YFL019C	4	14	6	4	7	2	3	5
YMR139W	617	1077	666	382	690	665	552	814
YDL080C	312	463	416	235	309	349	337	548
YOR172W	359	658	429	261	495	334	367	499
YOR105W	99.461	244.938	107.745	57.733	89.977	73.315	103.879	141.08
YJL138C	5702.66	7494.1	7131.49	4120.17	5135.9	6267.71	5521.23	8893.21
YPR143W	444.997	545	503.999	351.979	441.988	464	442	833.98
YDR340W	38	108	23	16	77	17	41	33
YNL322C	1074	1587	1411	942	1018	1359	1058	1791
YPL090C	4791	5948.8	6048.36	4302.79	5200.47	5804.95	4838.83	9332.24
YPR078C	3.478	5.733	0	3.106	5	1.126	3.366	4.424
YCR075C	186	297	315	169	198	264	228	358
YFL062W	17.064	38.952	31.345	12.276	5.104	11.208	14.266	10.692
YDR171W	2452	3970	3484	1969	2306	4076	2206	3330
YLR439W	795	1203	1113	735	804	1096	914	1352
YCR020C	58	136	102	47	78	78	87	95
YDR450W	3499.06	4340.9	4783.65	3225.29	3685.6	3759.32	3921.24	7129.61
YCL051W	508	852	744	427	606	746	554	798
YCR097W	351	644	453	228	624	380	506	610
YBL039C-A	4.249	6.367	0	0	0	0	0	6.36
YDR235W	216	470	221	102	407	179	225	264
YGL194C-A	25	55	31	17	23	22	30	42
YER038C	99	195	132	78	115	73	108	202
YPR125W	600.991	865	725	483	667.956	660	582	958
YHR049W	1249	1919	1388	829	1752	1608	1212	1887
YBR007C	364	527	425	205	337	329	327	540
YPL001W	241	361	275	134	235	188	223	314
YJL038C	0	10	1	4	0	2	1	9
YNL319W	0	6	3	1	1	3	3	0
YPR178W	251	387	363.925	197	221	287.978	243.973	481
YER079C-A	0	0	0	0	0	1.013	0	2
YDR475C	769	1094	864	442	667	828	713	782
TLC1	872	1746	1011	586	1132	662	1059	1017
YNL159C	230	365	303	151	205	212	200	335
YAL014C	291	469	413	259	327	427	327	493
YCR020W-B	65	111	57	19	106	44	78	100
YBR243C	466	827	644	402	516	503	532	743
YLR181C	295	482	409	250	349	353	272	482
YBL056W	1743	2888	2046	1155	2073	1882	1781	2501
YNL075W	433	616	494	340	437	465	408	825
YPL150W	524	833	693	376	577	612	548	754
YJL012C	927	1355	1180	635	955	991	943	1434
YJL065C	189.993	330	279	171	205	251.995	219	381
YKR020W	163	247	228	127	154	163	184	276
YMR053C	195.944	324.136	237.35	133.05	202.353	212.478	163.468	239.549
YKL066W	271	578	354	244	587	375	449	578
YMR004W	436	765	545	337	514	568	458	666
YER083C	591	963	886	561	653	765	621	1182
YPL176C	774	1219	1086	564	844	945	755	934
YHR172W	260	443	347	168	281	220	286	325
YLR263W	824	1503	1018	463	1007	921	841	1140
YDL240W	700	1171	786	397	871	690	782	890
YDR401W	4	3	5	4	2	0	5	2
YGL118C	1	3	0	3	2	3	1	2
YHR013C	292	489	435	239	352	361	363	574
YOL040C	4199	5598	5399	3887	4253	4886	4189	7856
YGR072W	255	443	296	191	344	271	326	529
YCL035C	984	1583	1503	995	895	1249	972	1945
YIL023C	478	706	696	389	418	479	504	777
YNR073C	151.375	261.135	215.921	167.26	174.918	245.953	167.855	249.59
YPR200C	46	49	44	28	37	54	68	64
YIL072W	92	142	113	61	65	78	79	122
YLR327C	4273	6738	6819	4154	3585	4990	5340	12240
YBR229C	662	1139	826	474	769	662	630	925
YML133C	49.866	22.388	9.843	18.536	8.645	22.079	23.413	70.768
YOR131C	344	437	444	312	375	433	325	637
YLR455W	371	567	424	235	364	336	343	560
YNL247W	1137	1815	1416	908	1419	1272	1114	1865
YOR054C	570.261	1020.03	828.322	459.923	615.682	855.024	583	874.874
YGL007C-A	7	10	9	3	9	12	9	10
YFR028C	534	848	790	472	537	676	606	814
YGR290W	1	0	0	0	0	0	1.017	0
YOR009W	118	225	233	109	121	153	132	211
YOR072W	6	6	13	1	8	2	7	12
YDR292C	680	1020	783	486	816	653	756	1062
YOR161C-C	4	8	1	6	4	4	3	4
YHR126C	6	5	6	2	7	4	2	5
YMR194W	839.558	979.872	1116.89	787.272	798.997	941.261	974.129	1603.59
YAL016C-A	3.035	2.013	1.007	1	5.051	1	2.04	5.126
YMR167W	242	345	244	133	242	211	241	336
YOR249C	198	455	226	118	267	168	224	271
YER117W	2938.78	3826.86	4359.81	2767.03	3168.73	3442.73	3939.78	5912.07
YOR301W	106	166	155	113	86	108	99	179
YPL187W	288	494	273	163	250	192	111	72
YKL218C	210	342	320	166	160	214	188	315
YOR140W	575	894	800.973	516	648	746.985	673	932
YDR391C	362	561	570	273	317	403	344	511
YLL063C	128	240	227	141	130	144	156	223
YAR070C	0	0	0	0	0	0	0	0
YOR276W	791.979	1160.99	992.896	679.929	963.956	902.989	996.949	1538.92
YMR309C	1914	2710	1566	757	2182	1287	1525	1813
YOR089C	722	1102	1058	646	765	901	846	1264
tD(GUC)N	6	0	4	2	0	0	4	1
YGR258C	524	794	587	388	530	578	408	776
YNL146C-A	20	23	23	5	25	11	11	17
YMR180C	260	391	431	202	236	297	267	375
YGL163C	598	760	633	353	508	506	461	659
tD(GUC)Q	0	0	0	0	0	0	0	0
YDR417C	11.043	2.003	2.008	2.01	7.026	2.007	2.005	8.01
YOL131W	4	5	6	5	1	5	4	6
YOR011W-A	0	0	0	0	0	0	0	0
YPL283C	1310.94	1903.11	1471.64	940.753	1170.96	1075.23	1206.14	1481.93
YBL021C	150	241	236	184	214	257	225	405
YHR215W	124.863	96.485	89.694	111.909	102.378	160.064	144.843	262.138
YLL045C	4823.83	6097.24	6726.58	4581.46	5043.52	5400.21	5051.9	8609.23
YLR156W	0	0	0	0	0	0	0	0
YLR007W	436	554	558	340	393	426	386	787
YNL261W	225	286	189	108	194	147	173	275
Q0092	0	0	0	0	0	0	0	0
tE(UUC)Q	0	0	0	0	0	0	0	0
YNL305C	922	1416	1311	783	854	1041	863	1376
YJL046W	241	444	350	169	343	230	273	431
YKR078W	231	426	268	171	297	252	254	377
YOR191W	792	1171	924	536	906	859	712	966
YEL074W	21	41	36	18	24	32	25	21
tE(UUC)M	0	1	0	1	0.5	0	0	0
tI(GAU)Q	0	0	0	0	0	0	0	0
YOL166W-A	0	0	0	0	0	0	0	0
YDR272W	892	1330	1150	711	872	1025	870	1410
YGR289C	768	1143	1010	564	815	1027	873.983	1107
YML020W	373	605	554	296	454	441	458	598
YLR103C	283	445	396	192	327	293	347	448
YOR294W	442	538	492	352	430	418	356	822
YEL062W	140	242	185	118	166	152	145	238
YPR064W	5	7	9	4	3	7	1	3
YPR031W	394	603	509	255	416	439	454	627
YLR038C	2078	3154	2838	1652	3407	3471	3109	4853
YNL096C	1791.99	2195.54	2362.93	1422.11	1837.46	1999.08	1826.93	3067.6
YDR038C	540.629	894.436	833.744	434.91	576.701	608.221	529.497	1043.87
YPR160W-A	0	0	0	0	0	0	0	0
YDL187C	11	8	5	7	8	8	5	14
YBR024W	352	541	467	319	326	389	314	496
YER171W	481	662	438	280	455	394	386	580
YDL047W	981	1357	1255	827	979	1237	990	1685
YML046W	268	470	241	146	377	210	246	325
YGL124C	243	379	335	174	284	234	259	377
YMR276W	1363	2232	2073	1271	1264	1841	1433	2445
YEL059W	11	7	7	3	4	4	2	7
YDL160C-A	57	81	67	43	58	68	70	61
YLR165C	183	306	248	140	222	194	209	262
YCR069W	925	1403	1450	845	927	1115	1030	1545
YKL223W	0	0.5	0.5	0	0	0	0	0
YGR146C-A	2	1	0	0	5	0	2	3
YKL027W	378	485	491	296	353	387	386	574
YJL173C	328	541	476	293	380	421	419	711
YDR152W	659	906	798	501	659	695	615	1060
YKL127W	549	942	842	561	583	774	632	960
YDR309C	1587	2399	1964	1073	1670	1949	1579	2251
YLR386W	426	676	448	233	484	401	409	603
tN(GUU)Q	0	0	0	0	0	0	0	0
YLR371W	805	1330	1003	560	938	929	821	1128
YDL169C	317	507	476	246	274	393	338	578
YLR092W	101	186	223	95	123	195	172	189
YER044C	1659	2631	2380	1141	1806	1836	2062	3354
YMR072W	1301	1833	1680	1083	1227	1484	1342	2436
YJR033C	596	841	701	340	542	582	559	730
YKR056W	673	898	804	487	751	648	641	995
YGL011C	1360	1919	1932	1105	1336	1595	1323	2099
YIR036C	510	810.996	758	521	529	677	504	938
YMR123W	286	441	388	233	283	303	310	593
YDR406W	1219	1840	1614	791	1663	1823	1629	1744
YGR073C	26	44.208	36	17	29	29.178	30	51
YGR209C	1379	1878	2025	1079	1369	1511	1852	2621
YJL150W	0	1	0	0	1	0	0	0
tS(UGA)E	4	2	1	3	1	1	0	5
YNL050C	355	446	379	246	350	347	364	621
YMR304C-A	302.175	630.422	314.601	161.219	447.499	261.115	297.855	404.155
YLR240W	412	652	516	240	396	419	438	528
YGR093W	332	496	381	220	385	327	329	511
YDL234C	932	1480	1110	553	867	1003	857	1191
YPR108W-A	0	0	1	0	0	0	0	0
YNL136W	408	681	582	418	472	505	477	864
YKL049C	340	465	483	284	289	346	364	644
YJR080C	955	1630	1340.87	821.938	1349.94	1379	1106.97	1788.98
YNR038W	325	504	398	236	357	302	345	520
YGL140C	674	982	780	370	683	678	576	806
YCL029C	338	481	470	266	322	431	359	623
tY(GUA)Q	0	0	0	0	0	0	0	0
YFL038C	2436	3533	3504	2414	2467	3172	2630	4943
YJR131W	268	491	399	244	344	289	331	436
YNR012W	185	251	200	120	188	125	173	269
YNL110C	848	957	876	541	821	742	756	1397
YAL068C	0	0	1.03	0	1.053	1.031	0	0
YDR367W	293	597	317	167	403	241	311	436
YIL053W	2847	2379	2675	2194	1726	1894	2029	5149
YPL059W	631	1008	978	616	647	752	774	1187
YGL253W	17154	24939	20654	12418	19375	19646	18852	30557
YHL032C	1700	2634	2279	1469	2142	2725	2095	3012
YJL010C	382	564	416	207	475	307	382	488
YHL045W	1	5	4	4	1	2	2	2
YOR337W	337	417	364	191	288	281	315	487
YMR010W	530	1025	526	305	681	348	517	661
YOR097C	170	292	233	117	174	165	180	278
YHR118C	117	231	191	71	128	127	151	227
YGR024C	501	790	446	230	555	352	456	561
YOL023W	615	859	763	409	533	558	534	751
YPL253C	222	411	292	152	198	185	207	265
YOR008C-A	2	0	1	0	0	0	0	2
YER154W	692	1174	1030	691	710	944	737	1265
YBR300C	1	6	5	5	3	2	1.789	7
YEL036C	1180.3	1666.8	1590.81	1081	1156	1380	1291.83	1942.56
YBR260C	419	586	527	306	430	470	427	611
YPL124W	120	190	187	96	120	152	144	234
YAL042W	1586.96	2440.99	2388.98	1565	1682	2003	1763	3001
YAL035W	2401	3483	2886	1766	2536	2511	2291	3374
YNL286W	191	313	293	195	245	257	247	440
YDR001C	2107	3383	3047	1481	2183	2703	1995	2705
YIL162W	14948	22914	22943	12485	15106	16720	19473	29160
YOL141W	62	94	75	47	66	76	71	102
YHR145C	4.874	33.237	2.484	2.21	34.945	3.567	0	0
YBR195C	186	252	262	179	184	230	197	349
YIL039W	1070	1644	1430	849	1205	1298	1215	1775
YGR122W	341	553	401	219	352	331	383	539
YPL092W	150	255	198	99	151	180	169	172
YGR161C-D	338.547	808.721	528.339	297.546	440.74	341.279	471.266	400.982
YMR315W	1013	1593	1431	938	1036	1441	1174	2057
YGR213C	6	11	8	1	2	2	3	4
YDR384C	479	565	570	247	343	394	334	600
YML007W	1645	2547	1991	1159	1740	1693	1674	2775
YER063W	687	1056	988	646	773	970	778	1287
YDR481C	923	1522	1492	761	826	1087	933	1195
YER014W	322	405	393.995	209	295	315	292	422
YPR041W	1595	2259	1956	1221	1633	1535	1534	2439
YNL213C	424	640	509	322	383	403	377	650
YKL006C-A	282	405	499	271	296	349	432	562
YDL159W-A	0	0	0	0	0	0	0	0
YBR058C	705	1085	791	402	692	717	717	972
YLR024C	253	435	256	124	274	183	211	311
YLR071C	631	1217	654	363	815	570	631	739
YHR092C	773.119	409.112	267.104	106.008	650.137	397.511	291.69	336.032
YDL199C	268	480	332	169	282	303	269	359
YHL007C	1184	1710	1404	875	1131	1313	1164	1836
YER181C	0	1	0	1	0	1	0	0
YNL228W	3.03	3.014	3.073	0	0	0	1	1.003
tV(AAC)O	0	0	0	0	1.5	0	0	0
YDL064W	351	457	498	300	414	392	401	662
YDL031W	821	1122	1030	641	760	814	791	1241
YMR257C	384	698	335	186	561	297	371	435
YBL108W	0	0	0	0	0	0	0	0
YDR046C	2040	2780	2224	1226	2421	2140	1896	2625
YOR253W	280	428	434	190	310	290	325	452
YOR202W	0	0	0	0	0	0	0	0
YEL010W	0	0	0	0	0	0	0	0
YGL245W	2599	3829	3372	1831	2746	3263	2346	3785
YGR006W	124	167	179	97	124	150	149	164
YGR079W	578	627	653	468	536	533	509	1155
YDL119C	151	241	210.986	133	159	201	179	247
YKL151C	852	1245	1171	688	873	1235	780	1438
YGL198W	459.952	722.972	703	474.995	440.982	606.947	462.957	821.991
YDL086W	1214.98	1914.98	1587.99	1199.9	1256.88	1594.99	1105.91	2552.95
YBL091C-A	193	333	265	192	221	271	223	461
YLR361C-A	162	238	243	132	173	207	157	325
YBR141W-A	0	0	0	1	0	0	0	0
YOR170W	0	0	1.015	0	0	0	0	1
YHR038W	232	461	287	211	307	242	239	385
YML069W	1185	1788	1430	832	1374	1331	1211	1719
YKR019C	131	189	214	94	121	154	162	217
YJR073C	3093	4922	4811	2895	4001	5059	3941	5815
YGR279C	3462	5570	5006	3011	3555	4287	3658	5478
YCR073C	313	504	401	169	277	264	280	347
YCR022C	9	12	15	7	8	5	8	15
YLL015W	912	1525	1110	538	1109	938	849	1186
YNL195C	331	366	401	243	242	426	250	542
YDL134C	1281.53	1904.02	1540.33	958.065	1262.69	1571.58	1243.98	2008.54
YFL060C	168.247	220.805	184.397	108.887	213.283	215.324	191.286	229.366
YDR173C	139	237	202	130	136	173	172	276
YMR100W	322	572	393	231	428	315	324	503
YCL057W	1398	2335	1889	1028	1696	1663	1454	2219
YOR335W-A	0	0	0	0	0	0	0	0
YBR072W	1793	1723	1532	1426	2115	2165	1474	4245
YBR005W	272	390	404	251	263	328	245	490
YPR123C	6.09	14	6.09	16.325	10.22	6.066	5.092	24
RUF5-2	143.737	226.747	162.459	94.571	171.294	88.4	122.258	211.494
YDL173W	806.996	1192	1054	653	778.996	961.997	778.986	1411.92
YJR047C	18.005	15.003	22.008	15.002	18.004	14.002	12	8.002
YMR006C	1261	2085.44	2045.54	1111.51	1395	1554.5	1827	2420.49
YKL145W-A	28.675	18.575	36.967	19.134	9.721	40.012	24.621	54.087
YAL016W	1476.96	2466.99	1770.99	1027	1746.95	1676	1590.96	2205.87
YMR292W	186	367	181	129	327	146	230	307
YHR011W	184	305	285	147	209	205	206	335
YPL152W	182	245	234	113	162	167	205	273
YLR183C	489	818	661	388	584	533	520	839
YNL077W	458	680	610	339	485	531	593	859
YBR109C	1215	1895	1629	971	1187	1316	1215	1988
YBR172C	1088	1396	1117	733	1123	1070	1023	1525
YDR346C	1403	1913	1791	1036	1506	1487	1404	2418
YAR002C-A	1203	1960	1637	1080	1474	1290	1379	2234
YOL077W-A	1393	2058	1985	1095	1915	2110	2139	2962
YPL029W	300	436	361	241	298	319	284	456
YHR146W	1286	2019	1696	1395	1301	1648	1227	2946
YNL019C	0	2.487	0	2.496	2	2	0	0
YDL242W	2	5	2	2	4	0	1	1
YBR189W	4771.03	5945.17	6259.29	4309.35	5195.17	5394.96	4775.42	9145.17
YER085C	7	2	4	1	2	1	0	5
YJL225C	1956.37	2647.56	2456.37	1436.21	1890.43	2109.95	1851.87	2849.31
YKL064W	1063	1639	1300	715	1112	1296	1037	1433
YLR265C	123	239	125	79	147	95	118	172
YKR022C	306	435	430	263	349	335	368	515
YLR287C	295	417	280	151	272	171	276	391
YPL174C	227	451	200	120	287	153	249	331
YOR070C	569	889	779	400	609	767	678	909
YDR403W	67	106	97	47	72	66	95	86
YOL093W	210	275	280	188	197	247	210	404
YOL042W	377	512	437	214	380	325	425	578
YIL070C	1287	1938	1806	1109	1160	1250	1332	2085
YCL037C	15	9	7	8	16	4	7	16
YIL025C	5	3	2	5	3	3	7	2
YDR545C-A	0	80.684	66.439	52.738	0	40.225	57.045	81.061
YNR071C	59	113	92	61	115	141	74	70
YML131W	1579	2519	1954	954	1523	1835	1362	1820
YNL245C	162	235	205	145	168	195	198	424
YNR024W	223	301	245	208	222	240	217	385.927
YFL013W-A	5.013	2.003	2.007	3.01	1.003	3	1.002	5
tP(AGG)N	0	0	0	1	0	1	0	0
YLR329W	22	17	13	8	7	9	8	21
YPL043W	916.993	1019	879	577.997	770	653.997	703	1197
YCL045C	1506	2371	2013.99	1022	1556.98	1580	1455	2178
YBR056C-B	0	1.018	1.041	0	0	0	1	1
YKL002W	844	1316	1344	809	894	1192	962	1664
YDR328C	907	1515.99	1493	934.989	1100.99	1228.98	1135	1799.98
YIR009W	71	88	103	66	61	90	67	114
YBR154C	672	915	734	547	756	612	659	1073
YLR001C	665	1043	700	369	717	639	589	725
YAR035C-A	0	0	0	0	0	1	0	0
YKR101W	186	310	217	108	196	190	213	294
YMR230W-A	3	3	1	2	6	1	2	0
YER115C	140	290	246	160	243	206	200	323
YHR124W	32	41	36	25	36	44	44	64
YER148W	745.979	1013.99	863.989	533.959	789.997	827	796.99	1168.98
YCR050C	0	3	1	1	0	1	2	0
YMR240C	244	357	365	220	251	302	255	390
YOR303W	4720	6102	6119	3834	3950	4056	3547	6495
YIL087C	330	551	570	339	338	533	436	650
YMR192W	429	687	456	225	404	307	374	442
YCL074W	0	2	0	0	0	0	1	1
YJL221C	664.501	1092.16	927.606	496.897	753.628	897.501	758.879	1185.51
YMR229C	1190	1591	1108	516	1293	1020	1075	1351
YLL038C	98	167	131	107	122	144	101	158
YOR056C	656	884	850	534	678	668	645	1094
YOL108C	220	319	311	195	211	267	226	319
YOR270C	3054	4740	3470	1936	3302	3011	2818	4313
YDR106W	20	25	22	9	20	24	20	27
YOL068C	815	1256	1118	564	978	830	938	1264
YMR182C	305	403	381	220	233	308	304	472
YBR201W	187	328	242	184	197	219	262	348
YLL043W	1257	1826	1612	937	1365	1423	1325	2016
YDR415C	301	422	453	232	315	330	320	534
YGL161C	692	1058	1036	599	713	881	766	1128
YOL133W	189	296	276	161	150	243	197	348.997
YDL074C	777	1118	790	425	952	672	653	966
YNL263C	586	945	777	421	578	721	682	993
YHR217C	5.028	15.303	10.058	3.275	2.01	0	4.767	10.579
YDR128W	612	854	687	416	546	633	539	840
YOR193W	106	265	158	88	182	133	112	187
YER028C	82	118	119	85	118	145	107	179
YMR052W	74	127	98	69	93	71	71.914	130
YIL029W-A	0	0	0	0	1	0	1	0
YMR294W-A	4.028	0	2.009	3.013	1.004	3.029	2.005	6.024
YKR076W	735	1022	941	657	724	853	646	1418
YDR225W	2334.29	3248.91	3610.54	2317.1	2409.14	3298.49	2941	5224.05
YDR270W	503.98	753	660	350	617	634	580	1049
tL(UAG)J	0	0	0	0	0	0	0	0
YPR033C	1768	2613	2184	1283	1888	1957	1690	2663
YGR230W	261	429	375	251	205	224	226	381
YPR062W	690	966	917	633	685	801	725	1480
YDR528W	444	588	482	286	479	434	434	633
YER173W	267	444.99	329	209	273	283	257	421
YBR026C	1516	2426	2021	1185	1541	1721	1469	2395
YDL185W	4401	6681	5014	2677	4438	4935	3795	5638
YBR091C	100	120	162	85	88	110	102	192
YNL094W	642	1076	853	423	677	757	628	949
YGL056C	1587	2235	1774	1161	1623	1877	1510	2830
YPL227C	334	533	451	261	338	274	357	508
YLR222C-A	12	26	8	3	13	5	7	5
YDL010W	506	788	637	393	550.86	541	534.973	796
YML019W	265	486	333	167	388	299	341	446
YDL045C	488	712	614	387	521	574	453	759
YLR163C	851	1239	1156	705	689	804	736	1216
YLR178C	1168	1707	1636	1020	897	1633	1009	1529
YKL225W	0	0	0	0	0	0	0	0
YHL002C-A	0	3.037	1.003	1.006	1.021	1	1.009	0
YJL175W	0	0	0	0	0	0	0	2
YBL079W	675	1064	667	314	814	562	605	778
YNL056W	293	424	473	289	201	299	250	520
YFL001W	262	451	312	202	243	217	252	362
YDR150W	1426	2218	1687	939	1644	1609	1404	2151
YER147C-A	10.021	4.01	4.011	4.041	1.003	1	6.01	12.016
YKL170W	426.986	629.997	560.996	398	436.985	490.973	467.996	735.95
YPR157W	151	218	192	127	147	168	149	201
YPR137C-B	73.679	0	0	215.064	0	0	75.766	0
YLR384C	1075	1547	1141	624	1199	1012	953	1392
YPL060W	168	274	195	107	155	166	178	253
YML099C	330	484	344	209	421	326	319	444
YLR421C	534	814	693	379	552	570	492	784
YLR090W	617	899	846	521	621	748	559	867
YMR325W	3.712	0	1.472	1	0	1.292	3.574	0
YJR064W	1241	1855	1596	841	1367	1371	1292	1994
YML022W	640	867	791	539	669	657	744	1168
YER046W	172	281	245	176	223	218	242	423
YMR029C	645	1120	791	413	844	765	691	949
YIR030C	18	29	29	22	20	18	21	31
YKR050W	320	464	454	263	304	348	317	559
YMR121C	283.464	370.083	405.669	251.008	253.43	299.988	302.462	470.096
YGL017W	222	263	274	172	207	207	187	318
YDL150W	468.978	560	517	354.996	457.969	475	444	734
YNL038W	190	406	193	113	343	150	252	278
YHR001W-A	1340	2440	1662	1007	2413	1889	2084	2935
YOL165C	13.534	19.581	9.71	11.539	0	2.57	2.448	6.195
YIL139C	129	189	108	80	167	117	144	214
YLR246W	457	649	535	351	410	449	422	675
YJR119C	270	399	253	176	290	226	262	401
YLR359W	1300	1985	1704	1013	1136	1330	1141	1975
YLR199C	351	625	466	309	348	333	361	645
YJL206C	236	326	258	166	247	198	213	324
YIL142W	1327	1882	1818	991.983	1415	1487	1344	2215
YGL082W	515	852	682	408	634	703	586	889
YNL138W	1478	2477	1982	1150	1590	1847	1525	2169
YOR133W	2294.62	3214.99	3532.14	2013.23	2297.39	3085.39	2264.3	3936.9
21S_rRNA	60	108	103	26	112	81	98	46
YGL142C	388	619	497	240	468	368	425	544
YGR179C	213	406	359	190	263	284	315	413
YGR102C	308	484	467	285	269	408	315	539
YBR139W	1601	2876	2263	1174	1532	1940	1514	2181
YHR188C	1010	1655	1406	807	1107	1291	1118	1728
YKL106C-A	0	1	0	0	1	7	0	1
YNL116W	377	595	490	275	381	474	355	550
YNL139C	449.051	766.974	452.394	248.916	455.952	335.924	428.429	495.872
YDR361C	340	550	438	270	417	328	354	674
YLR445W	0	1	0	0	2	2	2	2
YGL255W	674	1209	1074	341	743	954	864	722
YFR007W	240	438	321	217	262	303	289	390
YLR333C	1157	1309	1407.2	938	1027	1114	1003	1814.17
YHR103W	766	1219	978	480	819	781	822	1045
YHL030W	448	795	525	238	493	390	411	537
YGL077C	1120	1967	1492	879	1823	1413	1385	1785
YPL204W	1496	2205	1920	1164	1486	1654	1530	2267
YPL251W	0	1.009	0	1	1.007	1.006	0	3.018
YIL009C-A	72	119	110	57	66	76	94	123
YOR091W	404	578	634	421	409	427	450	736
YGR026W	947	1801	997	596	1325	808	931	1243
YAL040C	1159	2231	1740	854	1225	1326	1310	1834
YDR288W	255	356	303	167	244	260	270	329
YGL208W	464	690	711	414	379	499	447	703
YNL284C	764	1181	949	658	773	758	730	1133
YIL164C	141	214	209	125	146	182	134	206
YOL143C	2965	4425	4285	2925	3107	3790	3050	4497
YBR237W	699	1017	822	444	766	738	651	1016
YBR197C	128	214	200	135	102	183	162	276
YHR147C	619	972	922	614	594	700	721	1051
YJL093C	635	1086	890	517	673	744	654	1025
YPL126W	1113	1343	1026	606	1130	867	864	1391
YMR317W	17.009	13	16	20.006	12	10.002	14	28
YOR251C	488	768	695	471	528	643	572	1020
YPR181C	1950	2984	2723	1581	2037	2375	2111	2884
YCL008C	272	393	377	228	235	363	248	393
YOR107W	437	475	360	246	306	313	251	360
YML005W	191	304	274	145	254	216	187	322
YNL215W	429	645	610	362	475	563	409	811
YCR075W-A	133	132	200	115	114	141	129	182
YDL059C	59	91	79	59	51	64	52	82
YOR204W	717	808	802	449	546	633	608	945
YEL012W	1147	1725	1520	999	1082	1433	1247	2469
YBL040C	421	718	513	253	561	312	537	684
YPR043W	2711.05	3534.85	4038.8	2899.71	3125.94	3469.6	3276.99	5843.27
YDR382W	2622	3887	3284	2395	3243	2815	2602	5187
YDR483W	2122	3167	2807	1628	2038	2314	2113	3225
YER061C	211	301	294	168	177	285	206	363
YLR022C	196	287	224	124	194	198	199	279
YLR402W	49	55	69	30	46	68	39	87
YLR073C	117	169	119	80	123	107	100	220
YER183C	178	224	216	124	136	168	185	308
YHR090C	335	441	397	240	275	309	352	489
YOL021C	1003	1221	1146	627	969	1013	880	1388
YHR030C	717	1140	934	485	705	738	685	1053
YBR295W	210	335	301	156	208	213	205	314
YKL018W	180	298	240	181	199	173	175	283
YIL011W	62	71	96	27	33	50	67	70
YEL034W	8376.86	12296.9	13065.9	8359.83	8576.88	11039.9	10515.9	18257.9
YHL015W	3540	4574	4778	3157	3509	3991	3657	6517
YNR050C	416	679	657	528	459	546	502	1426
YDR134C	2669.23	4237.88	3832.23	2276.9	2545.29	3171.73	3231.24	4561.99
YKL208W	175	253	276	132	161	188	182	310
YGR004W	131	221	175	102	185	170	161	232
YML110C	1853	2891	2418	1739	1840	2157	1592	2963
YGL048C	1669	2353	2358	1358	1632	2032	1712	2748
YGL243W	169	281	257	156	220	181	177	284
YKL106W	274	353	309	200	238	235	246	440
tN(GUU)N1	0	1	4	2	3	0	2	13
YPR029C	790	1349	737	417	945	675	654	986
YJL034W	5099	7427	7462	4178	5018	5848	5568	8832
YFL048C	848	1409	1207	689	858	922	874	1259
YLR117C	681	1061	710	454	760	725	667	951
YOR176W	1063	1769	1390	924	1214	1440	1199	1743
YOR109W	624	983	808	393	712	644	636	789
YBL089W	200	322	242	148	204	205	216	300
YDL084W	2488	3905	2735	1688	3029	2456	2671	4255
tC(GCA)Q	0	0	0	0	0	0	0	0
YGL116W	844	1277	1006	587	507	605	608	915
YNR034W-A	2130	3637	2751	1463	2906	3534	2503	2729
YCR024C	268	406	302	140	258	183	258	312
YIL102C-A	69	116	70	42	94	75	83	101
YMR102C	667	1010	858	460	811	919	658	1062
YCR071C	390	608	556	368	362	468	348	700
YDR175C	701	1113	973	605	662	766	649	1022
YOR189W	198	306	299	232	222	261	226	372
YOR154W	399	543	334	212	444	265	378	523
YPR121W	341	520	463	231	360	410	377	421
YBR070C	290	417	408	209	226	263	281	430
YOR396C-A	64.929	0	0	0	27.621	0	0	0
YLL017W	12	17	17	4	3	9	6	10
YDR351W	642	1054	759	397	703	591	608	809
YNL315C	871	1353	1205	760	838	999	936	1442
YPR174C	259	355	326	234	246	329	277	436
YJR045C	11339	17704	15917	9789	11342	14749	11482	17262
YMR008C	1641	2618.56	1885.46	1008.49	1652	1526.5	1635	2312.51
YDR349C	969	1681	1354	788	970	1028	1042	1473
YDL171C	2454	3299	2890	1133	2084	2409	2229	2492
YKL062W	1156	1747	1409	731	1164	1207	1137	1207
YJR010W	197	273	248	126	209	210	229	298
YJL218W	102	137	127	73	101	93	96	106
YIL126W	803	1147	888	531	853	866	757	1170
YDR093W	750.486	1186.82	931.663	467.174	882.533	861.384	757.52	1126.07
YMR282C	515	837	568	345	639	570	562	785
YIL109C	1825	2882	2468	1290	1865	2094	1847	2360
YFL022C	1779	2615	2452	1476	1763	2198	1801	2822
YPL109C	333	565	424	248	388	362	377	619
YJL156C	429	679	460	241	491	425	422	547
YNL071W	3273	5130	4575	3287	3372	4635	3066	6053
YMR088C	519	825	637	369	669	597	623	830
YGR211W	1243	1582	1487	965	1138	1190	1140	1796
YKL139W	288	540	331	172	390	286	298	462
YJL069C	480	542	476	299	493	329	390	653
YDR323C	129	203	192	98	135	106	176	211
YDR344C	5	19	10	1	5	10	9	13
YJL016W	470	784	528	266	568	522	430	594.966
YDR444W	538	839	669	434	590.991	584	608	860
YPL189W	62	103	90	31	61	68	74	60
YLR285W	345	590	453	291	441	383	344	573
YLR267W	219	355	225	98	176	151	140	342
YDL219W	111	241	167	73	217	105	182	190
YNL017C	5	4	11	2	4	4	1	4
YCR024C-A	807.4	1912.35	761.774	473	1316.44	574.493	691.414	887.722
YCR024C-B	856	2853	876	647	2489	621	882	1151
YKR024C	476	600	503	295	461	418	436	684
YBR156C	280	451	399	216	283	247	284	452
YOR076C	268	464	259	134	322	198	253	319
YEL059C-A	157	250	245	166	138	183	185	250
YDR405W	736	1181	1113	830	764	1017	718	1513
YOL091W	39	69	34	16	47	36	40	40
YCL031C	683	1033	683	395	879	666	587	872
YIL027C	209	416	219	126	349	174	247	319
YLR459W	389	720	340	174	447	270	329	403
YNL243W	1511	2228	2149	1157	1657	2064	1673	2285
YNR026C	343	489	470	261	357	391	407	528
YHL044W	160	253	218	109	127	138	118	164
YPR204W	3067.53	4656.3	3937.69	2542.82	3551.75	3658.04	3095.86	5180.78
YNL297C	471	918	465	195	678	381	424	509
YBR170C	428	668	571	297	360	455	426	664
YGR149W	492	1089	509	231	674	434	459	599
YDR458C	784	1351	939	501	1007	784	863	1100
YKL193C	533	978	680	414	668	637	499	812
YPR099C	6.062	4.041	6.029	6.048	3.026	0	7.029	11.106
YOR135C	1.006	1.005	0	2.027	3.009	1.005	3.029	4.014
YLR310C	1260	2101	1299	587	1529	1193	1189	1364
YNR008W	371	604	510	300	380	413	374	585
YJR150C	1	5	1	0	0	0	1	0
YBR301W	9.199	12.36	20.687	0	1.236	2.864	5.749	3.737
YLR003C	252	458	304	201	312	181	244	389
YER113C	483	701	517	287	499	474	502	613
YHR122W	300	428	417	263	336	371	309	606
YHL017W	329	597	411	194	424	348	316	393
YJR010C-A	111	146	131	82	106	109	81	186
YIL085C	715	947	773	462	693	720	700	883
YMR190C	410	613	515	252	408	423	353	559
YLR325C	2370	2916	3083	2023	2201	2572	2383	4029
YCL076W	0	0	0	0	0	0	0	0
YOR272W	528	756	654	451	599	534	505	946
YOR058C	537	853	601	348	452	398	429	550
YER172C-A	1	1.01	0	0	0	0	0	0
YAL064W-B	27	40	25	14	29	27	30	30
YDR413C	3.018	2.004	1.011	1.005	5.078	2.02	1.007	3.01
YBR203W	825	1291	979	364	814	742	700	648
YAR029W	8	12	9	10	14	12	4	8
YNL238W	921	1474	1294	709	1027	1070	1005	1431
YJL198W	511	645	622	340	451	383	527	846
YOL135C	134	192	193	136	127	153	147	278
YOR323C	772	1127	1024	673	896	973	835	1465
YLL041C	4710	7012	7033	4186	6313	8293	7001	10381
YKR074W	402	609	498	286	433	444	499	698
YMR274C	86	181	161	64	123	116	106	188
YER026C	2691	4300	3506	2020	3380	3048	2999	3878
YMR201C	253	353	349	221	248	318	298	457
YLR069C	1480	2331	2067	1087	1336	1625	1351	2020
YML042W	1404	2278	1748	623	1169	1541	893	895
YMR050C	22.145	243.689	194.52	117.346	144.653	172.715	232.642	55.25
YDR069C	363	614	332	217	421	336	347	467
YOR298W	31	41	32	27	22	16	19	33
YEL066W	295	488	503	335	264	380	367	688
YPR035W	5935	8640	7760	4418	5246	6623	5382	9550
YDR014W	114	236	112	55	163	92	120	186
YDR227W	604	1028	616	329	697	615	474	774
YPR060C	160	237	184	117	198	129	151	259
YMR037C	932	1471	1175	642	1185	1027	1038	1234
YCR038C	137	196	195	98	117	101	153	224
YNL257C	540	896	674	285	706	591	521	679
YCR072C	430	441	379	267	352	287	363	603
YBR093C	294.135	501.596	448.441	228.586	270.346	349.774	342.453	460.123
YNL092W	66	100	106	47	67	84	88	145
YGR045C	26	31	29	15	36	39	38	51
YAL037C-B	29.068	4.009	2.005	15.064	19.069	2.005	8.026	36.08
YLR134W	219.302	320.658	322.551	144.216	218.358	268.373	246.307	297.407
YOR218C	2.051	0	0	0	1.006	0	0	1.017
YMR203W	2074	2969	2822	1694	1840	2393	2038	3023
YKL096C-B	8	9	4	8	4	9	10	7
YPL225W	1029	1715	1372	701	1198	1078	1401	1719
YPL270W	949	1337	1187	682	1043	1071	980	1404
YDL012C	297	399	427	241	266	324	326	492
YDR218C	7	5	5	2	5	1	0	6
YLR299W	1290	2066	1903	1095	1294	1617	1301	2335
YFL003C	19	46	34	12	28	22	20	32
YPL051W	235	323	325	164	194	208	201	346
YNL054W	458	761	579	300	555	518	475	681
YDR156W	231	310	320	196	193	278	234	415
YPL062W	1	4	0	0	1	0	2	3
YPR155C	524	934	557	330	636	578	531	743
YOR137C	249	495	314	165	295	301	281	346
YKL123W	66.677	143.54	86.197	49.274	96.185	96.269	66.153	127.112
YKL172W	1210	1496	1184	875	1227	1218	1030.82	1944
YNL336W	905.521	1534.75	1143.76	530.758	850.677	819.868	835.914	1111.97
YDR305C	197	342	287	166	224	234	239	375
YJL057C	415	693	463	258	426	445	411	548
YPR100W	750.938	1151.96	1182.97	695.952	813.974	926	962.971	1453.89
YDR358W	580	1012	891	423	586	831	616	816
YJL152W	7.005	6.005	3.001	5.023	4.013	4.006	8	3.004
YLR096W	747	1070	921	475	729	770	682	915
YDR194W-A	0	0	0	0	0	0	0	0
YKR052C	167	214	221	134	195	242	185	311
YLR427W	706	1053	937	514	746	839	701	1024
YDL152W	3.089	1	0	3	2	0	0	2
YGL015C	2	4	1	4	0	3	1	1
YEL064C	234	395	254	155	227	186	213	283
YMR127C	156	236	192	130	206	165	186	262
YIL140W	1050.76	1600.4	1564.91	764	1103.84	1332	1255	1587.94
YOL163W	46	55	46	35	24	31	28	51
YLR197W	2076.98	2663.97	1907	1079	2184.86	1548	1688.99	2703.93
YBR213W	88	133	113	66	99	143	92	143
YAL064W	3	0	4	0	3	0	1	3
YJL204C	177	351	194	102	270	138	177	250
YLR244C	874	1103	1006	617	721	827	753	1085
YJR084W	306	388	330	234	287	312	296	510
YLR233C	235	409	246	107	298	208	207	284
YDL238C	196	260	228	171	195	208	180	257
YGL084C	580	1106	675	374	773	573	629	918
YLR382C	897	1403	1133	621	896	921	888	1139
YLR154C-H	1	5	3	5	2	1	3.228	4
YLR154C-G	144.597	183.993	316.872	152.529	101.84	154.958	129.528	130.338
YGR238C	367	528	437	193	428	400	377	424
YDR363W	274	462	334	201	294	272	264	440
YNL114C	11.145	23.054	13.106	11.041	14.099	4.011	8.09	27.097
YNL163C	749	1119	954	534	785	773	738	1093
snR55	2	4	1	0	5	0	1	0
snR54	1	0	0	0	4	0	1	0
snR57	5	25	4	1	16	3	1	3
snR56	0	1	1	0	3	0	0	0
YHR009C	864	1350	1092	749	968	1109	730	1369
snR50	10	14	9	7	6	6	3	8
snR53	0	0	0	0	0	0	0	1
snR52	0	0	0	0	1	0	0	0
YFR050C	1209	1837	1626	1060	1190	1447	1207	2028
snR58	1	0	0	2	0	1	0	1
YLR331C	1.024	0	3	1	0	1.008	1.007	2.015
YNR069C	180	290	251	148	194	204	241	288
YOL058W	2782	3933	3635	1925	2755	3796	2863	4068
YAR019C	271	444	377	149	294	325	304	324
YOR024W	1	0	3	0	1	1	0	1
YML129C	484	774	768	495	432	570	562	895
YGL257C	481	897	565	303	554	379	514	703
YGR020C	1198	1824	1688	1095	1272	1509	1326	2156
YOR093C	543	928	617	250	561	489	524	680
YAL046C	238	310	322	238	219	280	258	472
YOR392W	4	24	9	13	11	8	6	9
YAL039C	965	1508	1564	938	807	1098	909	1567
YGR100W	640	1021	849	421	812	721	738	912
YLR403W	829	1264	967	515	866	798	769	1190
YOL118C	6	3	7	2	4	4	4	6
YDR286C	117	175	167	105	122	131	124	216
YHR141C	3018.45	3780.06	4444.62	2874.64	3234.27	3422.94	3575.68	6153.14
YPL128C	317	540	503	235	360	429	403	500
YJL091C	166	428	193	107	261	130	217	237
YBR191W	2861.74	3487.22	3769.61	2605.88	2967.07	3172.27	3002.75	5430.02
YDR380W	5938	7980	5869	3675	4817	4704	4826	9176
YGR191W	795	1165.99	1067.98	559.918	740.97	763.97	805	1244.98
YGR047C	587	894	679	381	610	544	529	765
YDR485C	670	1020	814	511	620	702	622	990
YPL239W	401	565	520	352	419	441	384	766
YPR183W	996	1607	1336	1003	923	1210	1013	1913
YOR206W	1091	1622	970	569	1372	810	946	1490
YEL049W	32.244	60.206	78.95	69.885	20.105	45.232	37.686	60.139
YOR391C	178.941	285.859	286.087	139.982	119.503	254.87	106.79	177.585
YDR525W-A	314	443	324	134	293	235	333	254
YBR089W	5.033	5.016	1.001	0	0	2.009	2.006	3.012
YLR075W	9151.96	11520	12396	8633.93	8730.96	9950.98	9593.97	17794.9
YBR054W	4227	6170	4974	2593	4734	4758	3611	3777
YLR020C	424	696	495	284	493	393	411	563
YNL217W	372	559	510	356	466	498	483	822
YLR404W	101	194	134	76	147	92	115	175
YLR154W-A	1.129	0	0	0	0	0	1.117	0
YIL013C	169	291	266	146	227	198	203	358
YPL206C	705	1033	865	562	711	736	695	1226
YDL060W	712	867	873	500	655	698	674	1059
YBR293W	337	494	380	216	365	256	316	481
YNR052C	686.435	1038.28	864.517	577.501	688.888	791.626	662.405	1143.48
YHR032W	737	966	888	554	589	692	687	1076
YEL032W	1030	1378	1241	683	984	1131	978	1275
YOL076W	291	549	344	161	515	283	339	433
YDR136C	1	3	0	0	1	0	2	3
YHR203C	4122.33	5011.5	5394.09	3593.89	4026.95	4549.75	4134.59	7218.03
YJL136W-A	0	0	0	0	0	0	0	1
YML112W	207	297	295	161	212	197	210	368
YLR154W-C	12.083	8.1	5.033	5.069	8.091	2.018	3.027	3.028
YGL241W	262	482	313	170	385	256	326	405
YDL071C	2	2	3	0	2	0	0	0
YPR176C	304	525	448	286	310	345	370	619
tS(UGA)Q2	0	0	0	0	0	0	0	0
YDR057W	516	756	561	302	552	468	508	684
YJL036W	669	1109	860	486	691	806	715	1046
YDR521W	2	0	0	0	0	0	0	0
YER009W	1080	1832	1305	773	1267	995	1079	1779
YLR115W	480	704	637	308	472	425	501	651
YLR140W	2	0	3.094	1.099	0	3.558	0	1
YGL114W	651	944	831	480	711	725	692	1015
YER167W	587	927	743	380	574	657	511	821
YMR104C	1216	2088	1623	812	1230	1441	1086	1406
YER185W	18	12	25	14	22	11	18	25
YDL195W	2109	3554	2897	1418	2374	2866	2237	2816
YNL199C	481	759	693	411	493	562	523	889
YCR026C	871	1237	1117	599	770	927	824	1240
YBL052C	434	752	466	289.931	574	394.835	444	638
YBR076W	8	10	6	1	5	3	0	1
YNL317W	269	404	446	213	308	340	303	448
YLL019C	1599.19	2191.51	2146.25	977.502	1671.21	2066.07	1868.94	2025.42
YOR156C	203	296	292	162	213	201	238	327
YHR052W	854	1092	726	431	902	635	738	1169
YKR026C	316	488	435	260	396	358	337	546
YJR043C	247	405	326	205	292	314	282	387
YJR012C	114	204	158	92	112	132	143	225
YKL060C	32738	46837	45184	34482	35774	46226	37129	75866
YCR044C	337	533	519	311	393	437	436	575
YKL035W	2423	3723	3500	1820	2224	3385	2397	3218
YLR264C-A	2	1	2	0	0	1	2	2
tQ(UUG)B	0	0	0	0	0	0	0	0
YNL073W	1865	2834	2346	1537	1772	2254	1942	2799
YMR280C	617	1107	735	417	1041	939	786	1128
tQ(UUG)L	0	0.5	3	1	0	0	1	1
tQ(UUG)Q	0	0	0	0	0	0	0	0
YFL020C	22	53	44	18	18.162	46	24	59
YNL328C	36	41	56	25	28	22	31	69
YJL014W	1365	2006	1822	1087	1465	1572	1407	2323
YMR031C	3293	5172	4508	2215	3474	4777	3314	4566
YOR174W	248	387	341	205	277	338	283	477
YPR149W	5010	8821	8189	4880	5813	7139	6321	8766
YNL015W	2142	3308	3242	2054	2688	3559	3052	5113
YCR084C	1570	2383	2158	1209	1717	2029	1639	2497
YHR178W	311	468	440	258	328	376	350	597
YHL050W-A	0	0	0	0	0	0	0	1.572
YDR260C	212	278	246	159	173	214	183	336
YLR283W	263	412	268	178	300	230	270	354
YPL170W	531	747	686	489	502	598	547	915
YPR001W	291	346	279	116	226	300	186	164
YDR204W	409	593	493	329	383	485	360	617
YBR085C-A	970	1404	1451	802	715	874	759	1200
YDR251W	1006	1835	1311	613	1196	1173	1075	1284
YNL048W	608	990	745	423	794	652	731	873
YML057C-A	4	3	2	1	1	3	4.032	4.022
YOR074C	395.951	667	613	336	504.962	599	469.958	761
YPL028W	2816	4360	4185	2685	3105	3840	3244	5840
YJR152W	222	322	308	132	236	276	250	308
YKL025C	614	978	687	381	746	618	607	804
YAR008W	217	294	250	188	235	234	250	358
YOR003W	238	350	259	144	213	244	183	243
YOL097C	817	1073	987	629	834	841	816	1319
YOR110W	349	580	433	262	420	410	365	556
YDR407C	455	873	501	252	590	404	418	524
YNR020C	254	347	320	260	289	283	270	502
YBR258C	108	179	154	74	114	104	137	163
YNL146W	17	58	9	8	27	12	13	14
YFR019W	667	1144	796	407	660	635	550	802
YLR262C-A	950	1455	1635	936	1109	1389	1430	1885
YIL115W-A	0	0	1	2.07	1.017	0	0	0
YBR223C	203	340	295	152	180	230	216	327
YNL241C	2260	3650	3230	2163	2427	3295	2365	4600
YJL154C	695	1144	778	464	836	758	692	966
YDR091C	948	1351	940	517	1000	716	899	1256
YJL123C	1165	1812	1722	1093	1296	1594	1243	2283
YHR066W	658.347	760.646	635.595	395.609	682.396	465.554	518.579	882.656
YPL047W	132	190	178	109	135	173	160	252
YER086W	1386	1838	1835	977	1240	1439	1283	2059
YLR287C-A	2773.64	4040.98	4245.43	2606.48	3130.03	3201.12	3224.8	5716.22
RPR1	3	3	9	4	6	4	3	9
YBR176W	160	265	217	159	178	191	204	287
YDR207C	362	589	531	329	354	441	441	678
YKL125W	571	690	621	341	493	483	505	629
YDR373W	363	575	530	309	363	335	440	609
YGL238W	784	1530	732	378.964	1130	545	774	905
YLR190W	1405	2219	1785	1115	1118	1338	1162	1794
YNL128W	47	72	48	29	40	37	53	52
YLR312C	850	1160	1223	582	734	936	828	1248
YKL191W	458	624	527	386	441	471	487	838
YNR006W	633.992	1057	828	465	672	777	673	958
YHR120W	294	471	378	157	387	290	319	428
YAR050W	232.701	384.182	316.791	113.344	199.764	292.562	150.69	241.89
YOL137W	306	526	337	178	394	272	340	415
YDR530C	522	826	785	523	571	825	692	904
YER111C	309	636	313	163	462	263	284	421
YER144C	468	782	673	335	424	449	451	729
YOL039W	2047.93	2567.22	2729.89	1834.24	2058.99	2196.55	2016.45	3805.2
YIL083C	471	689	581	306	524	507	501	714
YHL011C	879	1132	1099	534	827	817	829	1335
YFR010W-A	1.028	1.018	1	2.091	1	0	0	1.041
YGR184C	924	1517	1061	484	1062	915	811	1068
YMR303C	1282.04	1886.83	1708.05	749.284	693.526	938.412	635.297	826.383
YDR307W	325	666	394	210	477	333	345	455
YDR411C	523	841	798	507	428	572	578	986
YBR205W	650.55	1165.7	931.717	564.988	653.986	757.642	769.823	1253.6
YOR321W	374	527	549	294	392	445	372	595
YMR186W	9700.15	14321	11799.5	6592.24	10244.1	10538.1	9660.39	13729.1
YMR278W	524	777	695	339	449	578	400	588
YLR136C	13	20	27	11	20	23	13	59
YGL260W	0	0	0	0	0	0	0	0
YMR207C	421	611	522	286	437	464	385	591
YML015C	330	542	452	283	371	478	365	610
YOR197W	710	1157	1027	616	760	871	744	1179
YKR089C	1388	2241	1797	883	1504	1754	1321	1831
YDL041W	2	0	0	0	0	1.017	0	0
YKR072C	824.739	1168.9	1026.66	636.077	790.318	986.926	789	1226.06
YDL014W	2271	2831	2700	1662	2258	2387	2065	3780
YML040W	0	0	0	0	0	0	0	0
YJL127W-A	0	1	0	0	0	3	0	0
YER079W	395	604	576	314	394	532	383	664
YER024W	2329	2999	2354	666	1886	2113	1235	1112
YOR230W	5472	8635	7388	4663	5073	6473	5610	10707
YGR234W	8394	13443	11383	6635	12467	12932	12136	18902
YMR178W	460	778	593	308	475	422	497	557
YPR037C	461	707	726	513.986	473.989	628	573	1186
YEL068C	124	203	190	121	122	183	145	207
YNL090W	185	300	290	183	212.997	186	223	359
YOR307C	369	581	394	235	403	319	364	450
YMR225C	448	719	721	454	499	566	514	983
YBR095C	385	578	489	319	418	441	362	640
YDR036C	754	1192	1007	623	896	982	824	1148
YGR043C	624	731	623	470	609	736	463	813
YPL223C	1004	925	953	1053	700	877	638	2543
YPL272C	224	382	236	111	325	275	290	297
YPR002C-A	20.509	42.568	17.993	14.801	25.035	12.51	29.477	39.838
YOL002C	702	1174	699	404	945	614	724	999
Q0032	0	0	0	0	0	0	0	0
YEL032C-A	0	0	0	0	0	0	0	0
YFL005W	824	1400	1165	740	1067	1081	1107	1618
YCR010C	317	451	327	58	160	173	168	158
YMR152W	631	1064	830	470	749	730	673	1028
YDR154C	2366.86	3482.72	3532.88	2713.57	2522.8	3022.76	2548.36	5693.75
YMR125W	985	1802	923	522	1421	735	995	1103
YJR031C	391	651	426	229	466	366	372	554
YCL026C-A	3	6	2	1	5	1	5	1
YCL026C-B	156	223	238	119	182	227	180	189
YGR118W	2851.25	3732.74	3991.09	2709.59	2950.51	3472.12	3325.38	5511.12
YJL055W	1026	1606	1324	905	1063	1324	1035	1745
YPR102C	2544.09	3100.24	3415.79	2342.14	2613.23	3049.13	2598.93	4905.82
YNL334C	101.753	229.195	175.603	130.113	178.717	242.676	185.714	335.634
YGL123W	7743.62	9991.94	9861.93	6759.93	7966.9	8599	7787	14168.7
YPL064C	310	478	447	267	333	366	361	649
YPL086C	434	616	513	316	502	430	427	636
Q0250	1	1	4	0	2	1	6	0
YPR153W	54	83	88	46	74	45	75	139
YMR042W	122	146	122	69	101	115	95	146
YLL003W	429	808	473	315	590	439	474	632
YER042W	207	283	229	163	245	233	204	293
YDR109C	346	528	401	257	391	366	346	512
YDR221W	458	734	644	383	556	447	453	765
YLR109W	6278	8952	8642	6091	5284	7528	5429	11437
YKR009C	379	566	575	324	430	542	389	757
YMR078C	350	499	404	235	389	362	382	530
YLR094C	686	1037	1024	611	699	864	829	1073
YBR037C	505	790	783	497	446	518	473	835
YLR041W	21	24	19	8	19	17	11	14
YJR060W	247	361	329	194	216	303	237	458
YNL161W	637	984	849	440	642	749	660	970
YIL146C	307	459	382	250	364	354	306	487
YLR195C	535	864	613	425	590	515	525	843
YJL202C	1	3	0	0	0	0	0	0
YAL066W	0	0	0	0	0	0	0	0
YCR081C-A	0	0	1.372	0	0	0	1	0
YLR231C	730.94	1200	954	682.876	838	974	683	1190.99
YKL016C	3175	4854	4420	2912	4479	5154	4407	7197
YPL111W	953	1397	1413	912	741	1036	816	2126
YKL174C	435	731	499	297	621	437	475	774
YKL121W	524	793	704	329	510	669	530	687
YLR380W	564	888	868	517	667	870	619	938
YOR142W-B	2331.06	3799.27	2310.7	1250.19	2449.34	2070.55	1939.94	2584.84
YMR012W	2310	3811	2607	1258	2985	2664	2328	2888
YER093C	323	579	370	237	385	308	352	483
YOR032W-A	14	18	17	6	8	9	8	17
YDL201W	332	484	451	315	388	377	348	626
YDR468C	314	505	409	266	345	354	323	617
snR73	1	8	0	0	5	0	1	2
snR72	0	2	0	0	4	0	1	0
snR71	2	6	1	0	7	1	1	2
snR70	22	36	23	16	22	16	17	31
snR77	1	8	0	1	12	0	3	2
snR76	24	55	42	32	46	37	35	61
snR75	0	3	0	2	4	1	1	2
snR74	0	9	1	2	3	0	0	0
YFR003C	264	457	433	268	278	427	323	541
snR79	0	5	1	4	7	2	0	0
snR78	0	0	2	0	1	0	1	1
YIL033C	2112	3227	3002	1970	2031	2741	2102	3544
YOR368W	174	306	206	138	212	145	229	263
YGR128C	425	685	399	211	527	277	376	511
YIL048W	653	1174	678	355	735	486	606	755
YIL142C-A	1	0	0	1.017	2	0	1	3
YLR337C	580.996	952.998	906	464	613.996	844	543	786
YOL056W	182	321	255	126	212	207	182	316
YFR052W	792	1304	897	512	865	693	800	1241
YGR088W	2027	3289	2794	1683	3486	6037	2704	3961
[truncated: 4,845 more rows]

## Sheet: pam.metafile.gene.readCounts.1h
	I_pam1h	II_pam1h	III_pam1h	IV_pam1h	I_WT1h	II_WT1h	III_WT1h	IV_WT1h
YAL008W	344	678	403	874	535	299	340	464
YBR255W	250	323	295	475	374	298	338	254
YGR164W	0	0	0	1	1	2	3	0
YGR131W	8	8	13	12	7	4	6	16
YNL003C	185	259	245	347	277	194	239	251
YBR135W	154.327	217	246	398	234	211	184	311
YBR160W	358	462	379	651	356	325	310	375
YJL082W	539	822	727	980	859	724	667	508
YJL142C	28.701	39.082	30.169	34.484	27.523	23.366	24.496	20.083
YPL191C	52	124	60	144	115	53	98	68
YGL215W	1693	2366	1464	3027	2597	1682	1833	1734
YKL074C	397	494	370	683	584	419	417	449
YJL077C	0	0	2	0	2	2	0	0
YKL096W-A	9151	13112	12365	24264	11401	11334	10883	16035
YIL124W	412	753	586	950	493	312	416	313
YLR364C-A	0	0	0	0	0	0	0	0
YIL171W	2	0	0	0	0	0	0	0
YPL039W	211	245	209	404	243	189	203	248
YNL170W	4	22	8	7.216	12	4.203	19	6
YGL141W	373	504	373	622	450	311	348	255
YJL179W	208	278	199	378	276	207	240	251
YDR316W-A	0	0	0	0	0	0	0	0
YDR316W-B	2447.75	2305.91	3106.58	5719.77	1489.36	1863.07	1974.32	890.104
YKL083W	12.115	9.07	1.001	29.024	12.06	13.087	4	16.059
YBR152W	147	137	155	272	169	166	138	149
YKL029C	3064	3803.99	3422	7539.98	4171.99	3775.99	3738	6615.98
YPL166W	29	75	51	77	54	48	56	50
YKL052C	290	309.866	328	538.716	328	297	234	343
YHR025W	793	998	989	1797	1124	1018	965	1575
YOL034W	268	340	301	461	394	281	275	252
YBL008W	314	398	317	539	425	320	350	301
YIL062C	320	526	561	855	484	462	502	650
YCL023C	0	0	1	0	0	0	0	0
tC(GCA)P1	0	0	0	0	0	0	0	1
YOL116W	145	186	155	273	197	161	177	209
YDR196C	208	274	276	499	265	197	252	283
YNL255C	1544	1794	1853	3421	2180	1794	1636	2980
YNR032W	184	199	211	316	199	178	198	229
YNR045W	253	293	290	471	355	310	338	361
YML105C	430	473	425	862	612	466	474	627
YNL288W	314	422	428	732	462	427	356	476
YIL059C	83	118	109.963	195.921	110	101.927	95.929	102
YIL004C	179	187	207	355	242	190	208	289
YNR018W	1875	1826	1843	3860	2617	2632	2256	4119
YPL144W	97	111	123	192	118	98	131	169
YFR047C	398	560	499	986	569	480	443	719
YER087C-B	192	238	268	513	294	243	265	370
YHR078W	260	351	289	487	417	272	350	288
YIR023C-A	2	0	0	4	0	0	0	0
YJR115W	26	41	39	73	36	26	20	43
YLR355C	11544	14028	14328	22670	13647	11738	10792	15085
YGR099W	158	206	193	336	227	177	197	217
YLR300W	12156	16102	13865	24804	13788	11403	9763	13839
YCL028W	653	799	764	1337	893	853	762	933
YJR140C	266	363	251	428	440	260	293	237
YOR033C	282	371	297	521	325	318	228	274
YOR062C	110	114	68	207	102	57	89	112
YBR043C	476	598	603	983	665	503	619	621
YHR112C	308	443	465	724	365	363	364	421
YLR011W	66	79	81	133	78	53	78	84
YIL044C	233	294	259	497	388	303	288	339
YNL197C	628	785	682	1163	886	745	692	566
YKR103W	115	170	136	196	152	107	117	103
YLR133W	205	217	210	303	157	145	160	156
YER121W	34	57	55	98	47	26	62	47
YCR046C	332	477	459	783	339	354	339	507
YNL144C	551	582	645	1013	607	454	607	570
YKL204W	582	744	668	1065	733	680	582	616
YOR266W	197	247	217	375	265	199	192	227
YDR393W	196	282	244	406	346	264	251	283
YGL171W	852	964	721	1451	1119	854	847	1046
YPR194C	648	1081	1083	973	1757	1483	1907	900
YGR019W	1181	1648	1658	2606	1175	943	1007	1155
YBL033C	1665	1914	1944	3882	1946	1703	1635	2808
tE(UUC)G3	0	0	2	6	0	0	1	2
YJL188C	31.011	17.005	9.003	60.012	33.009	42.013	17.008	35.011
YLL057C	17	29	23	44	24	9	24	20
YPL060C-A	23.489	14.95	0	34.531	18.563	9.438	0	0
YBR296C	68	62	72	118	70	61	57	65
YNL277W	91	60	87.61	205	86	67.741	49	51
YMR040W	58	56	71	110	58	43	33	58
YDR077W	48734	76850	77538	110989	60589	52809	49581	52925
YMR266W	1207	1540	1138	2006	1617	1218	1179	1204
YKR064W	272	466	326	510	494	276	393	263
YPL089C	1160	1868	1448	2679	1703	1491	1322	1388
YGR277C	231	267	268	493	244	231	217	282
YDL139C	60	99	88	124	81	46	49	97
YDR246W	203	299	266	486	249	213	206	287
YOR288C	64	133	103	131	117	64	117	111
YDL240C-A	0	0	0	0	0	0	0	0
YCR028C	376	391	402	706	505	414	421	416
YML054C	705	1272	1011	1055	2899	2112	2032	1309
YLR179C	509	579	473	1092	524	479	449	661
YOR141C	654	744	643	1112	882	661	697	646
YPL280W	173.978	214.384	194.083	377.76	156.087	118.485	87.367	101.615
YBL106C	122	92	93	167	103	84	95	94
YGL044C	241	308	300	481	365	295	288	367
YER107C	352	411	410	656	444	368	354	550
YBR038W	394	612	456	591	510	426	459	282
YER076W-A	0	4	1	0	4	0	2	0
YGR259C	10.039	6.076	11.046	4.006	5.024	4.01	2.015	5.034
YEL047C	403	582	465	1029	470	431	457	682
YPR016C	1444	1504	1367	2747	1660	1500	1310	1955
YOR208W	467	1055	484	925	751	412	554	432
YDL055C	9444	11556	10170	21734	11351	9390	8061	14813
YML009C	186	213	204	368	216	183	202	283
YML072C	1122	1456	1142	1918	1695	1404	1307	1128
YDR142C	225	261	233	368	315	231	218	240
YFL044C	428	578	622	887	491	417	453	517
RDN37-2	7.882	0	7.882	19.648	7.711	0	0	0
YEL011W	196	416	242	368	223	152	126	110
YKL019W	321	464	472	792	524	477	435	619
YJL130C	8105	9972	9207	9399	14059	10465	8982	6134
YBL085W	646	751	661	1113	743	606	602	722
YBR116C	171.99	456.116	239.901	576.137	198.828	96.444	98.914	124.947
YDR166C	346	551	342	570	609	364	413	304
YHR212W-A	1	2	0	2	0	1	1	1
YDR082W	201	298	278	464	352	267	333	316
YDR348C	541	702	593	1152	864	784	658	831
YKL182W	5593	5815	5089	10619	7090	7258	5620	7440
YDR445C	1.014	1.009	0	1.012	0	0	0	0
YKL018C-A	111	161	146	261	143	139	122	217
YPL027W	3	6	6	7	5	2	4	4
YKL135C	537.973	805	576	1011	885.868	615	669.502	464.937
YLR363C	80	116	67	110	159	74	94	72
YEL077W-A	0	0	0	10.657	0	1.853	3.492	2.517
YDR179C	63	115	35	86	158	39	118	44
YML089C	19	6	8	19	76	63	55	50
YLR431C	255	422	296	565	309	198	221	304
YKR046C	2337	3147	3374	4922	2833	2186	2080	3062
YJR005W	440	698	522	868	829	555	712	486
YJL116C	4453	4774	4365	8961	6427	5029	3755	6086
YMR030W	79	97	90	152	119	73	102	90
YER030W	428	498	546	859	603	416	538	660
YIR026C	746	801	657	1361	908	795	610	1178
YJR072C	818	911	1016	1726	977	932	869	1323
YDR515W	328	415	275	573	462	276	285	294
YKR039W	1724	1390	1685	1242	1335	1211	509	415
YGL003C	389	454	431	701	528	396	377	433
YPL009C	680	841.106	664	1357	959.607	741	667	862
YDR268W	157	278	200	366	206	194	181	210
YGL192W	4	2	1	3	10	2	8	5
YDL117W	724	1008	733	1264	945	711	704	720
YMR131C	2814	3129	2828	5678	3758	3147	2724	4091
YMR293C	143	246	179	297	255	157	205	175
YJL214W	13	24	9	23	13	15	19	21
YIL105C	289	397	341.315	467.278	447.629	280.274	327.155	227.216
YML126C	2668	3099	3001	4217	3672	2795	2366	2769
YLR189C	324	476	422	621	501	375	381	354
YIL150C	169	168	190	324	187	180	186	198
YLR349W	6.049	2.01	7.044	8	6.041	3.02	3.021	11
YGL250W	48	90	76	149	61	53	70	64
YBR212W	721	846	823	1412	707	534	601	636
YJR109C	2062	2256	2228	3987	3164	2101	2317	2772
YLR254C	285	275	281	538	281	282	273	391
YGR085C	4540.19	4919.01	4858.5	9229.34	6259.5	5297.37	5185.21	8388.81
YPL105C	1441	1569	1446	2612	1893	1604	1452	1761
YGR145W	1169	1305	1018	1996	1705	1281	1102	1393
YJR094C	19	80	38	75	71	25	71	40
YKL177W	8	7	7	12	11	6	7	5
YGL154C	74	93	102	191	93	80	91	113
tK(UUU)Q	0	0	0	0	0	0	0	0
YBR129C	202	275	201	396	338	181	254	210
tK(UUU)D	6	2	4	6	1	4	3	6
YMR322C	29.616	42.936	23.983	69.845	5.032	0	5.866	19.864
YKL099C	545	486	518	885	641	502	504	667
YDR315C	54	98	81	122	80	44	71	56
YLR394W	253	324	247	364	580	428	454	390
YNL104C	3747	4123	4139.74	6481	5582.71	4720.72	3849	5724
YNL151C	397	476	415	816	612	403	454	654
YNR066C	119	176	190	227	149	89	127	76
YLR220W	646	725	623	1064	820	574	668	969
YHR006W	780	1098	997	1604	1017	855	866	1030
YMR232W	36	70	21	63	61	26	40	48
YNL083W	329	356	318	547	411	330	321	308
YGR038C-A	0	0.005	0	0	0	0	0	0
YGR038C-B	1530.2	2618.26	1921.74	3412.95	2727.65	2407.17	2243.62	1731.11
YMR238W	1224	1763	1380	2647	1403	1129	959	1637
YER168C	427	446	357	641	541	383	416	497
YPL265W	1085	1041	1114	1630	1498	1128	1058	1069
YOR227W	424	845	557	813	705	502	568	416
YOR081C	342	400	364	595	386	311	319	271
YEL026W	2669	2824	2512	5254	3221	2656	2602	3999
YGR050C	4	3	6	5	5	6	9	6
YDR021W	317	369	200	477	473	292	324	328
YGL063W	63	66	71	118	63	68	65	105
YPL212C	1463	1792	1351	2657	2018	1601	1414	1871
YOL157C	22.643	37.958	38.04	65.253	27.3	34.551	22.081	62.657
YOR345C	0	1	0	2	0	0	0	0
YPR095C	395	470	341	642	560	412	428	383
YOR310C	3781.27	4274.29	3469.16	7037.17	5229.26	4138.34	3757.86	4849.07
YDR188W	1787	2216	2170	3573.99	2327	1984	1812.99	2574
YOL128C	173	198	163	323	253	169	193	249
YGL236C	481	502.972	600	1010	592.992	586	489	598
YHR133C	305	343	290	564	419	317	326	393
YDR017C	975	1016	864	1631	1357	1022	889	978
YIL090W	614	865	635	1073	970	693	836	716
YBR183W	236	370	301	357	409	205	244	186
YOL048C	52	99	57	108	73	59	71	78
YML039W	0	17.876	18.62	0	18.948	0	0	0
YCR007C	46	116	73	111	106	71	111	93
YDR540C	12	19	19	32	19	10	24	16
YEL004W	98	214	96	186	199	89	164	94
YPR057W	245	257	249	399	331	269	254	299
YLL032C	161	243	180	297	207	145	190	134
YDR116C	400	540	443	791	491	435	403	576
YPL119C-A	7	56	10	11	27	7	17	9
YDR299W	1079	1282	943	1825	1807	1363	1287	1420
YLR030W	58	76	74	119	71	57	57	66
YDR122W	463	624	567	757	691	506	547	447
YOL062C	510	692	678	1225	881	835	675	874
YNL234W	166	230	148	391	237	153	156	269
YLR467W	1188.65	1193.09	1380.58	1932.35	1071.24	1301.61	1168.61	1007.7
YJL194W	268.979	364	297	402	338	292	273	216
YOL015W	31	36	21	46	29	16	43	30
YDL070W	1814	2866	1901	2937	3587	1711	2874	1893
YOR241W	463	532	479	846	536	445	462	559
YLR056W	5263	5504	6792	9297	5467	4791	5481	6353
YPR039W	0	0	1	0	1	0	0	0
YMR054W	533	691	584	887	646	482	475	485
YKL110C	553	579	538	1095	835	643	638	1017
YML100W-A	0	2	1	1	0	3	1	3
YPR070W	295	415	278	471	512	278	350	304
YLR204W	315	363	372	721	351	280	312	476
YML097C	374	428	333	762	588	424	410	519
YKR007W	219	258	249	450	269	219	282	349
YDL096C	0	0	0	0	2.051	2.061	0	0
YHR193C	2594	2913	2832	5685	3436	3072	2930	5363
YBL099W	2189	3014	2668	4038	9904	9051.99	8126.98	9180
YJR035W	277	379	318	499	447	331	333	251
YOR126C	179	247	219	397	202	180	204	257
YMR023C	197	239	203	306	245	183	201	229
YOR119C	1297	1641	1367	2246	1884	1319	1306	1323
YNL196C	3	5	6	7	1	6	3	6
YNL187W	206	206	209	428	198	189	204	290
YMR141C	9	13	4	10	26	8	7	10
YLL014W	249	236	198	353	281	196	312	303
YBL062W	0	1	0	1	1.014	0	0	0
YCR061W	137	179	183	224	144	135	144	150
YOR199W	3	1	1	2	1	0	0	0
YPR115W	408	608	455	778	574	471	409	331
YHR088W	789	977	714	1438	1142	834	887	1206
YBR017C	745	954	808	1287	870	679	798	766
YPR162C	238	259	227	420	282	189	291	272
YGR166W	376	649	425	704	573	395	362	362
YDL161W	431	586	580	842	599	554	542	604
YKL050C	140	168	145	272	179	164	146	175
YJR055W	59	115	84	171	120	69	92	109
YGL099W	850	972	819	1562	1261	1010	917	1079
YFL030W	300	410	387	566	1843	1486	1240	1427
YIL119C	117	196	120	160	199	80	180	77
YPL193W	549	574	496	990	682	537	470	647
YNL005C	663	787	736	1308	1016	749	768	922
YGL217C	0	0	1	2.073	0	0	0	0
YJL144W	34	50	46	77	19	12	22	31
YBR012W-B	9.072	0	24.626	52.01	11.089	10.582	9.254	0
YLR379W	0	1.006	1.003	0	1	1.006	2.018	1
YJR139C	1065	1350	1103	2215	1611	1164	1099	1349
YBR133C	348	356	363	630	402	351	337	386
YBR162C	2290	2683	2425	4207	2809	2587	2201	3010
YNL331C	144.591	211.071	175.005	300.519	171.377	126.427	181.287	186.418
YJL079C	2037	2756	2611	4256	2748	2931	2247	2346
YGL019W	443	550	499	939	572	526	458	731
YGR201C	171	225	249	632	208	114	150	304
YNL172W	317	377.839	336	490	446	276	338	216
YNL058C	406.956	655.936	593	978	446.976	388.931	368.827	417.944
YPL160W	2886	3231	2883	4401	3996	3150	3059	3237
YOL083C-A	0	0	0	1	1	0	2	0
YNL023C	654	768	795	1251	786	700	647	893
YDR214W	1758	3592	2168	4037	2011	1768	1351	1841
YLR222C	1372	1639	1321	2302	1962	1512	1418	1441
YLR295C	583	663	714	1132	2072	1700	1883	2314
YER175W-A	2	11	1	1	9	1	10	0
YHR168W	209	251	219	336	291	240	200	241
YOR064C	148	169	192	276	430	346	365	484
YOR159C	167	155	143	295	226	170	175	264
YOL081W	941	1439	799	1249	1548	779	805	517
YOL036W	1240	1369.98	1334	1968	1462	1278.99	1106	1231
YGL148W	1249	1487	1379	2611	1879	1802	1572	2530
YOR031W	100	137	106	292	77	58	88	130
YBR282W	286	342	308	562	289	283	251	375
YDR194C	1436	1712	1324	2372	2084	1520	1494	1429
YOL114C	11	20	10	18	7	5	6	10
YGR084C	448	577	469	926	585	465	475	537
YNR030W	302	448	307	538	444	281	292	326
YAL037C-A	0	1	0	2	2	0	0	1
YML007C-A	4	3	5	4	0	0	2	2
YBR018C	27125	37946	35737	61931	36821	28216	36064	36763
YKL076C	54.668	78.555	67.33	116.835	82.954	44.396	55.191	114.197
YDR466W	481.895	676	539	1029	816.54	524	619.721	535
YFR045W	163	235	166	301	215	143	177	174
YIL002C	365	513	364	661	548	443	430	361
YGR159C	13390.9	14350.9	13027	25762.9	16786.9	13739.9	11089	18152.9
YLR369W	305	412	399	699	483	374	390	415
YFR032C	50	68	22	26	94	79	54	55
YNL118C	820	1034	807	1402	1108	784	916	720
YGL228W	740	874	832	1234	1018	716	796	814
YJR117W	665	924	690	1169	864	696	612	565
YBR196C-A	5	7	0	5	6	3	10	2
YBR196C-B	10	5	5	6	7	2	6	4
YIL030W-A	24.017	27.37	22.526	39.202	21.366	26.528	20.211	26.089
YLR357W	627.994	710	604.942	988	815.987	667.974	657	609
YER127W	851	923	822	1532	1124	903	830	1224
YBL015W	325	447	420	567	2288	2221	1674	1591
YLR017W	803	937	830	1717	933	846	742	1274
YHR110W	233	322	318	555	303	269	264	348
YBR041W	343	576	378	637	573	419	445	416
YOR394W	5	11	7.842	20.093	11	10	10	4
YCL068C	0	0	0	0	0	0	0	0
YDL220C	107	181	139	223	142	146	155	135
YDL039C	2186	2257	1830	2748	2853	2719	1498	1906
YKL202W	4	9	7	17	14	11	5	12
YGR122C-A	2.688	4.57	1.21	1.195	2.939	1.341	3.493	3.526
YOR264W	937	987	1052.99	1816.99	900.997	683	745	826
YNL042W-B	3	2.178	3.291	1.054	1	0	0	1.038
YBL029C-A	115	152	149	275	153	118	139	189
YOR008W-B	7	6	10	24	7	12	8	14
YOR366W	5	4	9	16	6	5	2	8
YNL275W	213	349	227	356	333	227	269	250
YAR015W	1034	1119	1080	2464	1181	1076	803	1642
YOR384W	0	3	2	2	4	1	3	8
YLL051C	366	496	480	776	602	387	483	436
YDR427W	574	1138	579	960	1078	445	751	540
YLR079W	771	846	848	1483	749	634	646	826
YLR408C	43	47	43	77	64	29	50	37
YMR093W	1038	1184	1098	1745	1464	1237	1070	1236
YBR221W-A	0	0	0	0	0	1	0	0
YDR079W	129	191	154	307	179	127	143	178
YMR268C	185	248	158	317	291	201	194	173
YOR169C	1	2.012	0	6.041	1.005	2	1.002	2.013
YML070W	836	1243	1030	1827	1032	916	892	973
YHR175W-A	4	21	3	6	14	2	17	10
YPR072W	593	839	582	1075	868	590	654	678
YMR108W	6468	7487	7045	12300	10585	9175	8348	12397
YCR091W	129	183	161	290	144	97	125	126
YER062C	5072	5659	4603	11497	5316	4294	3633	7283
YDR244W	391	447	444	692	501	394	393	402
YER189W	51.362	63.034	57.749	80.984	60.799	45.01	75.721	40.407
YJL009W	0	1.007	0	1	2.033	1.008	1.019	1.008
YDL137W	1431	1852.41	1799	3181.79	2020	1526.77	1779	2390
YGR271W	397	518	358	645	677	445	443	337
YDR233C	4194	4839	4164	8996	5354	4357	3972	5840
YGR071C	195	431	195	362	400	171	300	152
YCR106W	47	59	43	65	108	87	113	77
YBL100C	0	0	0	0	3.005	1.006	3.023	0
YER109C	293	364	300	475	435	327	321	329
YDR489W	200	241	158	383	200	168	177	244
YPR049C	375	570	417	685	601	347	410	317
YDL057W	144	196	188	305	170	119	140	176
YPR014C	0	0	0	0	0	0	0	1
YGR257C	341	408	434	678	432	366	374	457
YEL045C	16	8	12	24	15	20	8	7
YPL235W	787	889	728	1362	1088	854	826	1025
YLR122C	18.804	11.054	22.861	14.357	19.161	13.789	12.212	11.859
YLR155C	0	0	0	1	0	0	0	1
YBL087C	2437.3	2577.49	2743.17	4997.61	3332.65	3001.57	2881.93	4899.65
YJL132W	161	303	241	348	176	149	163	149
YGL190C	427	790	466	751	782	422	603	424
YBR110W	321	465	396	650	660	429	478	433
YDR144C	241	301	316	454	302	275	361	417
YFL046W	159	210	175	334	285	205	171	257
YOR103C	102	239.957	96.964	211.946	261.951	99.952	180.981	107.968
YKL137W	254	300	262	465	316	275	322	321
YDR447C	3873.17	3429.04	3764.09	6911.37	5791.59	4238.17	4417.01	6522.58
YGL009C	3336	4404	3894	4269	5362	4170	6377	6469
YNL324W	0	0	0	1	0	0	0	0
YPR145W	2630.11	2654.55	2991.54	4253.98	6188.62	5577.91	5832.48	7293.35
YJL063C	453	563	558	972	567	491	517	774
YMR149W	558	568	534	925	722	507	611	750
YPL021W	0	1	0	1	0	0	0	0
YIR010W	339	396	373	635	409	404	387	410
YDR331W	265	275	228	487	401	285	318	319
YJL114W	3.905	5.076	0	0	7.969	7.019	4.947	2.285
YKR044W	287	333	352	602	385	359	323	480
YLR433C	253	330	325	461	356	265	299	322
YMR068W	94	108	129	196	92	86	90	118
YLR157C-B	0	0	20.36	0	0	51.822	45.253	65.951
YNL164C	245	348	282	518	426	264	335	366
YER032W	276	329	325	554	380	286	285	263
YJR070C	1908	1901	1873	3846	2190.99	2009	1823	3314
YGL005C	429	461	448	694	664	326	460	434
YHR043C	584.012	784.616	705.229	1330.98	803.472	660.4	646.209	943.871
YDL111C	727	787	642	1323	931	726	723	1009
YMR133W	7	8	4	4	6	5	4	3
YPL007C	118	167	160	228	226	117	241	134
YKL159C	79	105	72	123	101	72	91	98
YDR507C	646	761	674	1055	760	671	637	469
YKR075W-A	0	1.037	0	4.066	2.026	3.107	0	1.017
YLR138W	1061	1365	1181	1764	1372	1110	1060	1288
YBR101C	494	655	491	876	713	517	485	650
YLR396C	216	348	248	416	326	240	287	256
YBR245C	578	675	543	867	749	664	589	550
YJL216C	75	91	69	129	83	89	65	71
YBR210W	64	114	95	141	127	77	117	94
YPL103C	212	294	287	419	268	285	317	286
YIL103W	404	476	372	723	492	382	416	507
YIL152W	123	120	148	252	113	97	120	148
YML045W-A	0	0	0	0	0	0	0	0
YJR096W	287	504	334	807	338	266	246	329
YAL010C	126	201	159	345	204	146	185	159
YGR143W	1080	1344	1087	1804	1513	1083	888	853
YGR112W	203	278	247	438	257	192	193	269
YLR256W	958	2245	892	1833	2147	852	1695	1101
YHR174W	33944.4	48724.8	44358.7	80108.1	36222.1	34203	31498.2	50898.1
YOR012W	26.363	22.198	28.745	71.065	44.313	30.846	25.106	41.521
YIR001C	264	354	290	602	441	367	365	405
YDL213C	643	844	800	1678	884	795	716	1310
YDR442W	0	0	2	0	1	0	1	0
YDR317W	27	58	33	67	64	40	33	36
YDR478W	81	114	93	219	112	115	98	140
YKL097C	0	1	1	1	0	2	0	1
YOL164W-A	0	0	0	0	0	0	0	0
YNL106C	291	360	293	543	354	342	301	298
YOR378W	10	21	12	22.067	28	29	17	19
YFR015C	189	208	229	323	143	93	109	95
YMR230W	3092.09	3055.59	3158.47	5688.74	4533.19	3239.73	3609.39	5152.15
YIL092W	234	228	234	397	218	195	227	248
YAR009C	6085.31	9786.79	7260.84	9892.05	9835	7529.91	8326.93	7860.37
YLR321C	365	394	358	684	473	381	364.975	494
YBR004C	247	523	193	452	475	217	395	252
YGR052W	75	124	94	193	106	58	88	77
YJR161C	278.901	364.946	359.941	538.164	330.693	192.351	311.586	280.512
YOR278W	138	163	133	249	181	135	151	167
YNL085W	749	1183	700	1122	1396	777	1019	602
YGL061C	51	118	64	95	118	79	88	96
YPL210C	971	1256	817	1630	1466	961	1078	1050
tS(AGA)G	0	2	0	4	0	2	3	1
YOR087W	277	354	296	447	412	278	366	307
YGL234W	2300	2535	2488	5206	2896	2653	2110	3656
YOR347C	173	280	239	439	212	175	159	210
YPR093C	130	181	188	325	135	106	136	213
YAL029C	1077	1413	945	1713	1587	1160	1110	925
YOL155C	979.913	1817.52	1388.73	2003.41	780.853	925.969	486.121	659.252
YDR421W	239	317	287	492	482	345	391	414
YGR186W	898	1001	927	1460	1232	1003	957	1037
YDR294C	674	805	788	1178	863	659	635	783
YHR135C	644	818	899	1419	891	783	847	966
YDR015C	0	0	0	0	0	0	0	0
YBR181C	6448.95	6531.84	7159.1	12424.3	8851.2	7615.38	7265.33	12709.1
YOR078W	870	977	768	1429	1274	875	857	1192
YOR243C	1154	1233	1104	1946	1624	1231	1101	1347
YMR165C	411	458	469	758	532	427	399	418
YCR005C	1672	2100	2601	2214	1051	727	748	781
YLR163W-A	0	0	0	0	0	0	0	0
YPR055W	239	376	221	343	380	179	324	162
YIL016W	144	165	153	304	220	190	174	261
YLR032W	287	406	302	526	345	301	275	244
YDR114C	1	2	0	0	0	0	0	0
YLL030C	0	0	0	0	0	0	0	0
YDL185C-A	0	2	0	0	0	0	0	0
YLL065W	0	0	0	0	0	0.5	0	0
YPR046W	52	56	65	102	56	46	82	85
YBR099C	3	10.476	2	10	9	3	8	8
YBL027W	6294.79	6918.78	6961.94	12635.9	8914.16	7432.98	7095.78	12930.6
YOL060C	447	654	657	976	593	544	550	565
YIR018C-A	1	2	0	0	1	0	0	0
YOR382W	79	136	156	215	173	142	140	223
YNL232W	609	720	629	1187	758	592	622	903
YDL076C	196	277	192	408	257	177	170	244
YOR225W	0	0	0	0	0	0	1	0
YDR120C	1133	1250	1150	2236	1584	1213	1173	1723
YLR465C	7	6	7	23	17	10	17	7
YJL192C	398	530	384	789	578	400	477	495
YEL020C-B	6.06	2.006	1.002	3.005	3.008	2.021	2	2.007
YLR054C	19	28	20	44	21	21	23	23
YLR009W	1945	2089	1842	3415	2675	1997	1702	2970
YKL116C	242	306	273	462	303	250	256	259
YBR209W	0	0	2	0	1	0	3	0
YOR292C	46	99	96	129	101	60	116	59
YLR423C	86	173	111	167	137	88	101	76
YDR278C	0	0	0	0	0	0	0	0
YLR105C	310	351	338	547	364	273	274	417
YML091C	1068	1251	861	1187	6732	3494	5601	2999
YHR191C	67	99	80	150	107	84	68	120
YDL098C	91	109	88	173	117	93	102	98
YLR202C	20	45.354	37	39.001	34.442	27.45	24.754	21.342
YLR299C-A	0	0	0	0	0	1	0	0
YKR005C	120	132	132	217	156	124	122	127
YMR143W	3768.52	3887.06	3969.66	7359.49	5714.54	4362.98	4528.83	6964.73
YCR063W	72	81	83.971	130	60	60.957	61	48
YNL189W	1720	2077	1684	3180	2276	1772	1738	2080
YFR024C-A	569	812	851	1341	754	643	653	742
YCL047C	86	128	110	227	156	112	138	188
YGL122C	1068	1196	1098	2020	1254	1136	944	1338
YDL018C	77	111	89	139	77	59	98	71
YOR120W	4891.98	7553.93	6527.94	10891	6368.84	5522.91	5384.91	6047.97
YPR160W	1827	3705	2532	3997	3030.9	1799.96	1814.96	1220
YBL060W	321	471	331	557	530	355	414	360
YDR065W	133	178	144	227	204	105	159	119
YBR019C	50695	74299	69920	102390	69616	57691	64940	64856
YKL056C	7848	7552	8414	13901	11131	8509	8720	13237
YKL065W-A	144	111	124	303	166	51	101	170
YGR160W	28.104	28.071	6.02	67.098	39.12	31.101	8.029	34.078
YDL163W	0	0	0	0	0	0	0	0
YPL068C	256	294	216	344	292	254	212	263
YJR057W	147	207	179	312	171	153	170	219
YGL211W	542	592	587	998	616	547	499	730
YFL032W	0	1	0	6	4	1	3	1
YPL195W	506	749	486	816	863	480	719	450
YCL044C	293	376	363	543	359	319	308	318
YAL059W	426.977	332	390	764	517	403	365.99	720.998
YNL007C	584	1198	610	1132	677	457	454	460
YPL148C	108	150	136	247	124	115	169	162
YJR137C	525	533	489	919	641	430	470	351
YMR021C	153	233	204	332	237	194	186	201
YMR074C	299	389	361	553	429	311	379	444
YGR203W	76	115	101	240	106	95	101	144
YJR039W	125	182	121	179	177	112	113	100
YDL158C	7	30.683	4	21	24	2	23	8
YOR104W	249.728	300.241	250.329	463.832	328.397	229.703	217.552	287.811
YFL009W	515.49	638.664	512.561	929.41	622.91	519.075	555.162	522.157
YLR297W	104	167	164	270	173	124	203	157
YLR279W	0	1	0	2	1	3	0	0
YDR216W	1284	1769	1302	1572	2245	1220	1700	801
YIL120W	111	170	137	277	165	128	130	159
YBR030W	306	376	317	557	411	349	305	369
YPL162C	157	150	154	309	215	181	195	181
YGR095C	486	517	464	995	545	505	460	665
YCL027W	46	50	50	71	98	95	60	43
snR3	3	0	0	1	2	1	0	1
snR5	9	21	6	24	23	12	23	9
snR4	75	86	81	187	92	48	88	139
snR6	0	0	0	0	1	0	0	0
snR9	24	18	21	30	22	25	29	20
snR8	10	6	5	8	19	6	6	11
YHR029C	138	161	144	296	191	130	180	215
YIR021W-A	1	0	0	0	0	1	2	1
YAL033W	126	119	133	222	189	137	159	228
YNL130C	251	380	278	492	310	222	309	225
YNR036C	513	718	646	1093	527	515	513	789
YNR049C	229	261	237	421	296	246	198	343
YDR192C	170	240	236	396	253	197	253	253
YOL112W	401	631	540	911	663	566	553	683
YML109W	286	366	354	528	433	381	319	320
YOL083W	208	371	247	529	260	177	229	238
YNL251C	739	883	699	1350	925	824	739	1013
YBR266C	1.007	2.021	0	9.016	2.004	0	1.012	5.02
YBL004W	1163	1227	866	1502	1715	1115	1095	1075
YER145C-A	1	1.001	6.013	4	4	4	4.004	8
YBR164C	270	383	275	495	431	305	323	419
YHR074W	627	907	808	1174	888	706	726	737
YDR464W	867	1006	853	1400	1167	894	848	883
YFR030W	631	689	653	1109	858	632	552	541
YJL146W	212	270	177	326	231	192	224	217
YKL078W	758	829	723	1170	883	840	692	855
YIL055C	223	273	201	396	185	150	148	172
YPL053C	723	1004	820	1377	1081	740	844	937
YLR351C	444	539	472	982	566	475	496	659
YEL009C-A	1	7	3	8	7	1	7	5
YJR111C	396	419	363	699	452	399	369	490
YIL030C	1055	1317	987	1546	1480	985	1035	771
YER125W	956	1220	1082	1431	1271	1089	1050	984
YER152C	513	653.969	664	1188.98	510	437.954	382	728
YLR015W	270	268	314	558	367	245	293	371
YHR116W	145	178	162	275	119	129	125	194
YPL259C	273	432	344	517	498	350	408	324
YOL100W	599.952	790.842	690	1058.96	943	653	716	627.94
YOR039W	350	483	369	703	522	396	425	468
YDL037C	884	818	617	948	1198	971	582	396
YLR334C	1	4	1	0	5	1	8	1
YHL043W	1	3	1	2	0	0	0	0
YOR364W	4.925	3	2	5	4	1	2	1
YOR386W	89	162	109	143	88	85	91	68
YAR042W	919	1073	1077	2078	1022	919	931	1082
YPR198W	357	529	317	596	586	269	422	341.991
YHL038C	183	276	176	364	320	212	238	228
YLL053C	147	178	201.596	167.584	996	864.243	872	655
YDR425W	114	201	144	219	178	96	189	93
YOR331C	4.016	5.023	0	14.033	6.022	5.025	0	5.016
YML076C	330	394	375	525	464	317	346	315
YKR060W	249	314	248	454	308	254	268	325
YHR094C	7.125	14.412	9.277	14.284	7.127	7.107	9.136	5.115
YER069W	4039.99	3950	3586	7128	5777	4355	4097	4521
YMR091C	450	472	441	784	611	489	402	578
YER012W	692	927	809	1377	819	589	649	685
YHR098C	721	1096	830	1366	1038	865	856	766
YDL135C	219	333	260	502	318	269	280	353
YCR093W	827	1253	776	1152	1363	803	982	630
tP(UGG)O3	0	0	0	0	0	0	0	0
YGR273C	1	1	3	3	5	3	3	2
YGL080W	209	254	210	373	300	194	242	214
YBR069C	5823	6195	5386	9516	7383	6099	5170	5781
YGR077C	340	520	335	711	550	402	408	362
YCR104W	0	0	1.158	2.307	0	0	0	0
YDR040C	695.017	1100.02	1097.61	1503.53	811.444	833.726	627.412	1233.21
YPR012W	1	6	1	8	7	6	14	6
YGR255C	338	491	373	744	391	289	334	399
tM(CAU)M	0	0	0	1	0	3	1	1
YDL051W	1392.99	1644.96	1531	2919.99	1993.97	1667.99	1543.99	2329
YBL102W	227	245	218	422	318	258	258	312
tM(CAU)P	1	2	4	9	3	1	4	4
YPL237W	1931.99	2086	1885	4002.99	2409.99	2120	1932	2818.98
YLR120C	420	708	605	925	644	537	473	425
YCL001W-B	3	7	7	8	5	3	2	10
YCL001W-A	6	6	2	1	8	5	7	0
YNL068C	634	610	596	1111	835	713	634	660
YJL169W	0	0	0	0	0	0	0	1
YBL002W	274	378	325	565	363	342	287	346.106
YDR146C	281	406	387	570	381	348	323	297
YBR112C	985.022	1238.6	1232.3	1607.57	1356.75	1207.02	1147.51	1058.67
YBL081W	627	747.091	739	1144.69	861.467	749.302	697.134	848.42
YFL040W	2	2	5	2	5	2	7	9
YNL326C	227	285	255	442	328	241	250	305
YDR337W	370	462	384	749	443	338	325	448
YJL061W	437	589	384	707	625	399	459	429
YPR147C	196	260	224	355	280	214	237	231
YKL131W	4	4	2	4	1	1	3	2
YDR441C	570	638	649	1270	748	571	543	904
YPL094C	853	1110	926	1897	1245	981	903	1609
YOR101W	1078	1107	914	2341	1342	1023	997	1500
YER020W	297	361	422	716	338	321	310	424
YDR231C	142	160	151	281	274.96	225	233.991	263
YJL112W	646	706	658	1008	1248	859	809	740
YFL066C	151.117	149.452	144.861	239.421	93.942	84.943	132.137	0
YNL193W	144	227	155	289	207	135	136	133
YML058W	613	674	760	1204	738	674	631	768
YBR188C	140	135	164	248	158	135	154	172
YLR435W	337	374	338	594	446	332	353	552
YJR076C	539	638	551	969	650	533	520	668
YKL157W	1190	1698	1371	2248	1913	1469	1331	1282
YBR003W	235	351	340	571	397	308	297	320
YPR129W	585.974	700	566.946	1119.98	726.977	584.987	635.901	687
YDL113C	205	367	302	388	354	281	297	238
YMR135C	337	507	458	729	408	308	320	365
YGL007W	2	1	4	4	4	4	3	2
YPL005W	140	243	166	287	215	149	198	172
YBR247C	1227	1321	1107	2176	1675	1326	1157	1527
YLR185W	2480.3	2465.53	2678.19	4978.69	3598.75	2905.29	2954.6	4910.82
YJL210W	222	256.979	264	466.887	261	212.991	220	240
YLR398C	638	916	656	1110	990	679	683	593
YIL154C	212	362	326	536	262	272	237	331
YIL101C	265	404	335	548	227	196	171	175
tT(CGU)K	0	0	0	0	0	1	0	0
YKL004W	967	1101	940	1747	1212	925	870	1147
YPL154C	2890	4096	3684	7111	3440	2455	2192	3309
YPL101W	464	528	509	832	620	547	451	618
YLR258W	555	1038	814	1118	712	478	461	411
YBR178W	1	2.023	1	2	0	0	2	0
YJR098C	99	111	112	156	112	82	127	86
YHR176W	120	147	130	251	141	150	117	147
YJR018W	10	6	1.008	10	9.034	2.008	8	13
YMR326C	0	0	1	2	0	0	0	1
YDL244W	28.854	58.916	33.551	98.73	25.274	25.568	31.06	34.228
YDR319C	78	166	93	136	164	84	150	92
YKL095W	208	220	235	425	214	195	213	228
YOL099C	3.048	6.158	2	4.039	5	0	4	2.06
YIL094C	1140	1373	1386	2778	1424	1244	1398	2443
YLR451W	569	670	570	978	783	582	647	637
YFR017C	109	189	169	288	141	121	111	134
YLR342W-A	2	9	1	2	3	2	1	6
YIL076W	617	919	721	1395	817	657	619	796
YNR077C	0	2.341	1	0	2	0	0	1.295
YOL044W	210	310	220	393	327	209	234	195
YLR323C	153	168	146	305	191	145	116	227
YOR085W	441	487	504	924	629	442	506	598
YGR054W	2337	2815	2088	3825	2838	2312	2055	2487
YOR050C	2	2	2	2	3	1	2	3
YNL087W	614	723	627	1092	998	760	858	847
YGR114C	0	0	0	0	0	1	0	0
YLR318W	147	293	163	280	282	137	246	144
YBR278W	86	122	139	263	94	92	122	162
YNL024C-A	155	234	178	264	248	153	235	252
YDR296W	459	619	598	964	570	497	472	731
YGL232W	237	364	212	412	412	227	313	254
YPR091C	412	587	442	681	664	439	543	441
YGR141W	247	318	309	476	300	241	252	320
YAR030C	6	4	7	8	3	5	6	5
YGL111W	790	908	827	1520	1127	806	794	1183
YJR158W	0	0	0	0	0	0	0	0
YHR137W	1452	1747	1504	2043.99	3159	2197.99	2905	4105.99
YFL011W	7	18	17	25	9	11	9	19
YMR198W	144	140	157	218	147	102	127	127
YCR003W	315	287	302	521	370	268	272	332
YMR316C-B	27	45	51.997	53	41	37	41	53
YMR316C-A	0	3	1.048	0	3	0	1	1.037
YDR342C	5852.16	5721.12	6621.3	7627.88	8488.5	5250.71	7766.28	4119.35
YMR163C	118	205	116	206	190	137	168	127
YGR294W	8.603	4.541	7.812	11.325	12.881	8.058	8.137	8.788
YEL008W	6	6	4	4	4	2	7	0
YLL067C	187.223	0	110.103	61.18	28.146	0	0	71.489
YHR086W-A	0	0	0	0	0	0	0	0
YBR020W	48726	69024	64164	102636	66245	56550	62083	73085
YLR418C	281	401	323	641	433	345	350	391
YDR112W	0	0	0	1	1	0	1	0
YER059W	250	344	334	543	369	274	308	305
YNL076W	542	631	602	924	760	597	558	626
YBL025W	80	98	87	136	115	98	88	120
YOL066C	345	428	440	787	513	431	436	539
YDR126W	105	110	99	190	130	112	131	129
YPL216W	220	243	255	345	266	195	231	212
YOR223W	69	116	102	159	119	79	87	113
YEL022W	389	606	389	671	753	438	550	380
YHR072W	1285	1378	1336	2080	1428.88	1174.83	1070	1339.5
YOL019W	740	1033	842	1510	985	747	698	845
YLR463C	19.741	19.218	24.311	75.28	17.249	25.726	36	44.439
YJL190C	3464	3352	3538	6874	4877.53	3995	4009	6820.81
YMR218C	288	383	273	467	481	284	335	264
YNL265C	273.975	343.978	296	555	372	267	286	325
YNL230C	118	234	152	251	146	106	148	134
YLL049W	131	213	140	219	159	128	161	165
YHR211W	273.822	326.379	370.927	428.912	314.155	329.898	341.794	353.033
YPR166C	213	232	180	378	276	185	269	237
YJL042W	618	907	676	974	851	661	690	528
YNL301C	1188.32	1417.48	1301.21	2234.4	1754.79	1279.7	1327.57	1762
YDR333C	587	691	577	894	783	601	609	521
YMR058W	356	369	442	698	1557	1155	1062	1039
YDR061W	376	458	403	703	445	351	339	417
YJR112W-A	109	167	159	207	177	133	141	229
YOR290C	625	903	714	1051	1100	779	802	700
YKL114C	437	534	445	888	566	426	415	540
YML024W	4749.83	4733.96	4655.91	8816.63	6995.41	5511.83	5354.99	8694.42
YML093W	1755	1833	1793	2964	2504	1984	1689	2133
YHR197W	955	1375	843	1399	1558	985	1007	1054
YDR276C	1056	1268	1243	2111	1349	1058	1093	1396
YLR200W	247	260	251	469	303	211	267	285
YKR003W	174	278	266	380	250	212	234	208
YLR107W	795	972	618	1480	940	617	601	763
YMR321C	0	2.832	0	43.003	5.412	11.427	0	55.6
YER175C	206	246	229	394	303	207	250	234
YIR012W	1426	1660	1470	2956	1831	1672	1358	2223
YDL183C	203	196	150	303	223	130	147	174
YPL278C	133.764	188.76	171.785	286.122	255.501	191.047	133.233	192.735
YMR105W-A	0	0	1	0	0	0	0	0
YMR118C	81	138	148	310	71	27	43	100
YCL049C	603	922	845	1473	739	635	661	996
YBL066C	484.953	565	556	729	1384	1084	1181	774
YGL120C	2692	2649	2401	4928	3297	2769	2327	3516
YGR271C-A	469	543	357	676	877	398	551	540
YDR169C	482	574	606	931	630	565	490	524
YOR057W	322	492	373	638	557	368	409	443
YLR410W-A	242.561	269.505	195.533	478.586	233.476	154.927	239.198	0
YLR169W	1	0	1	1	1	2	2	0
YMR272C	1039	1268	1265	1810	1321	1117	1072	1097
YPR108W	897	1174	1029	1654	1166	833	848	783
YKL054C	2729	3342	3172	5087	3503	2949	2764	2795
YGR162W	4240	4443	4068	6994	5768	4720	3921	4779
YDL165W	258	293	272	511	270	244	241	391
YDR520C	281	392	303	487	357	172	287	253
YKL023W	189	222	186	358	240	182	212	294
YJR051W	464	573	597	1040	635	539	637	775
YNL009W	186	225	200	323	240	170	161	191
YFL034W	362	448	406	577	534	367	395	332
YKL164C	3384.55	5455.89	4624.17	8191.08	3910.02	3334.81	2840.76	3580.75
YJR135C	64	67	70	117	95	61	97	97
YGL213C	305	382.994	299	508	460	308	325	310
YOR161W-A	0	0	0	0	0	0	0	0
YMR076C	177	338	206	348	288	221	285	154
YOR161W-B	1	0	1	0	0	0	0	0
YJR037W	0	0	0	0	0	0	0	0
YNL027W	371	529	413	605	593	418	490	426
YLR291C	395	552	449	739	556	442	444	534
YDR210W	97.999	98	133	161.998	118	92.999	89	124.998
YIL122W	387	615	483	862	571	424	445	464
YDL230W	114	161	153	265	116	121	115	159
YJR113C	548	733.993	741.993	1215.99	753.997	594	678	912.963
YGL075C	112	139	128	203	174	129	137	154
YHR041C	125	150	134	271	200	183	146	241
YIL156W-B	165	213	211	380	181	210	227	338
YIL156W-A	0	2	0	4	0	0	0	1
YLR416C	0	1	0	2	2.598	0	0	0
YGR097W	2011	2582	2029	3780	2528	2056	1913	1986
YIL068C	330	444	343	606	580	343	423	372
YCL025C	7117.34	6529.24	6952	9204	8616.33	7536	4990	5808.6
YNR034W	150	264	208	352	192	132	170	192
YOL085C	1	2	1	1	1	0	1	4
YNL282W	115	161	162	281	129	137	115	181
YBR286W	2889	3893	3388	7162	3395	2643	2294	3578
YGL144C	337	409	371	580	467	361	369	400
YDR190C	1274	1518	1430	2517	1728	1378	1310	1747
YAL031C	254	359	340	507	337	255	304	263
YBL006C	250	270	317	498	305	256	249	380
YNL132W	1568	1719	1372	2315	2102	1704	1541	1711
YBR264C	119	126	94	216	126	104	79	169
YBR231C	230	288	311	461	248	236	230	286
YLR162W-A	0	1	1	0	0	0	0	0
YPL197C	1.002	6.015	6.015	7.013	5.015	7.028	1.002	5.009
YHR076W	316	347	316	585	398	324	349	411
YDR462W	288	338	357	625	317	243	250	348
tP(UGG)Q	0	0	0	0	0	0	0	0
YJL148W	1028	1118	1021	2097	1393	1101	1003	1527
YIL057C	313	285	440	720	250	198	251	463
YPL055C	288	288	342	556	302	243	287	365
YLR353W	271	296	289	454	376	326	280	279
YIL020C	157	186	179	297	223	180	190	216
YIL148W	4747.43	4948.62	5230.35	9640.94	6645.9	5594.81	5666.35	8803.6
YNR016C	5312	5951	4489	13218	4693	5804	3736	9028
tY(GUA)J1	0	1	1	3	1	2	1	0
YFR036W	101	98	110	204	120	98	100	134
YER023C-A	0	0	0	0	0	0	0	0
YHR114W	325	509	390	665	493	354	357	419
YGR028W	275	316	269	463	359	224	260	293
YER150W	1827	2507	2538	4416	1806	1265	1386	1843
YNL279W	25	26	34	62	45	49	44	29
YDR400W	153	219	192	294	238	179	171	232
YDL068W	0	1.021	0	0	0	0	1	1.017
YOL027C	1413	1684	1509	2615	2046	1664	1382	1916
YPL257W	22	51	36	72	48	34	47	40
YPL120W	101	171	118	224	189	103	182	140
YOL145C	962	1254	981	1550	1417	1079	1181	938
YJL099W	293	491	400	573	425	277	289	314
YHR149C	609	712	670	1023	729	710	614	555
YDR395W	1166	1584	1138	2005	1689	1216	1399	1237
YOL110W	176	234	233	359	187	209	174	243
YDR005C	434	581	465	754	605	406	503	471
YMR311C	596	775	770	1189	687	572	589	788
YHL041W	1	0	1	0	0	0	0	0
YBL039C	2713.3	2785	2727.6	4979	3610.55	3013.08	2551	3724.97
YGR188C	137	182	146	215	156	119	126	125
YOR362C	1026	1380	1416	2199	1170	989	1027	1241
YPR106W	208	263	212	358	218	159	183	119
YLR126C	125	154	145	287	173	145	156	214
YDL053C	456	657	503	988	683	555	550	738
YML074C	1261	1545	1345	2538	1701	1466	1137	2204
YKR062W	414	505	454	810	533	436	437	648
YBR235W	464	555	513	892	583	454	459	480
YER010C	174	244	224	392	205	173	184	227
YML003W	45	67	34	63	62	26	54	33
YMR097C	218	261	226	397	267	234	241	269
YDL133W	312	371	355	527	437	312	355	262
YNL330C	391	500	473	767	562	456	426	527
YGR228W	13.233	11.347	5.061	26.333	15.273	13.348	4.171	14.392
YHR096C	844.875	1299.61	1074.72	1584.73	1133.88	645.9	634.867	735.886
YBR008C	194	269	218	401	201	206	234	234
YDL035C	702	856	770	1319	941	706	782	688
YMR253C	120	153	104	178	172	75	123	103
YCR102C	12.77	30.498	24.058	70.108	28.975	27.209	30.397	77.547
YJL127C-B	163	197	180	284	329	217	285	215
YOR257W	178	242	250	365	279	228	242	313
YGR002C	268	384	323	462	352	231	306	301
YEL041W	73	137	112	180	108	86	88	91
YGR075C	61	65	36	76	104	57	70	64
YGR253C	1028	1313	1241	2031	1227	895	950	1146
YDR510W	551	682	657	1278	628	579	567	972
YEL014C	0	0	0	1	0	0	0	0
YPL050C	886	1095	838	1697	1354	982	1010	1177
YMR166C	166	201	203	329	227	165	185	208
Q0115	0	0	0	0	0	0	0	0
YPR045C	272	313	281	461	350	227	304	253
Q0110	0	0	0	0	0	0	0	0
YPL231W	5936	5946	5706	11273	6583	7034	4943	7850
YLR148W	242	491	271	421	455	230	381	243
YMR137C	167	279	190	335	270	149	243	153
YDL082W	3533.95	3872.2	3920.14	7110.7	5015.61	4325.5	4317.19	6764.44
YKL155C	566	710	611	1062	818	547	551	674
YBR162W-A	267	262	305	496	303	285	299	499
YFL042C	285	440	422	606	348	327	341	373
YBL083C	57.163	102.49	95.654	124.29	94.834	84.426	97.539	136.972
YDR148C	1377	1608	1591	2517	4774	4178	3804	3985
YHR052W-A	86.402	187.948	118.672	244.308	95.133	75.171	132.602	119.721
YPL096W	145	215	177	283	218	138	183	178
YDR335W	616	882	690	1034	1191	754	854	692
YPR141C	99	176	134	190	194	117	163	107
YJL067W	0	2.008	1.011	0	0	0	2.031	0
YMR039C	371	497	394	827	647	487	429	714
YIL058W	5	6	5	16	4	4	1	7
YNL320W	149	215	147	300	252	175	177	186
YPL078C	1084	1390	1249	1941	4062	3199	3062	3502
YCR095C	192	305	186	363	351	201	266	215
YLL011W	875	906	879	1543	1195	973	877	1083
YCR077C	1098	1486	1120	1891	1526	1130	1222	1136
YLR437C	101	119	116	204	98	74	89	139
YFL064C	95.094	82.393	126.141	133.001	85.954	124.949	52.44	82.709
YNL191W	347	337	278	729	368	283	244	311
YDR237W	375	440	466	770	562	421	484	498
YJL110C	601	723	610	901	849	661	638	617
YKR048C	1472.94	1904.94	1839.97	2896	2019.97	1693.94	1532.96	2536.89
YBR001C	344	497	460	633	395	326	377	339
YPL003W	72	84	75	141	94	66	76	74
YKL108W	101	158	115	214	114	139	104	118
YGR110W	152	175	199	271	252	200	220	252
YJR074W	211	280	269	436	233	187	202	254
YPR127W	586	894	893	1694	791	544	497	632
YIR028W	6	11	12	24	13	7	6	13
YAL012W	1711	2072	1606	3594	1841	1706	1271	1670
YMR288W	381	459	388	615	576	453	479	413
YIL156W	194	305	298	376	324	257	259	242
YBR241C	285	465	402	589	284	233	199	253
YHR063W-A	3.023	2.025	1.017	4.048	4.075	0	4.082	4.02
YJL212C	50	34	35	114	36	34	32	36
YPL156C	239	236	271	237	361	229	254	160
YNL312W	261	341	383	549	289	295	295	308
YLR187W	189	238	220	272	306	227	205	176
YDR099W	1630	2686	2112	3647	2590.91	1876	1954.81	2004
YKL133C	315	401	335	534	347	225	322	361
YLR400W	0	0	0	2	1	2	2.01	1
YHR170W	2575	2821	2208	4771	3562	2657	2301	3564
YDR259C	161	292	176	404	201	124	121	178
YKL068W	977	1122	965	1802	1254	996	978	1071
YOR032C	137	184	101	270	169	101	107	107
YKL093W	567	786	697	1096	662	554	547	634
YMR002W	1326	1680	1723	2616	1467	1268	1229	1480
YLR145W	117	154	134	257	216	116	151	209
YLR261C	64.407	95.939	91.779	157.021	114.886	76.34	87.757	122.271
YDL246C	58.616	23.424	62.754	100.595	0	68.845	0	92.161
YER081W	453.426	660.452	630.012	913.547	622.866	507.559	402	521.307
YPL178W	386	534	444	686	543	383	441	510
YMR172C-A	1	1	1	2	0	1.061	1	0
YPR202W	51.462	179.928	75.018	140.288	111.41	49.682	207.064	28.39
YIL096C	455	584	315	831	646	413	514	625
YOL046C	1	1	0	0	2	1.004	0	0
YFR011C	301	374.952	271	558	942.898	598	627	753.797
YIL074C	577.574	655	529	1251	776.567	571	559	617.693
YGL173C	1440	1715	1446	2288	1842	1545	1480	1391
YHL008C	582	729	550	1024	751	564	475	601
YLR457C	115	144	181	236	143	145	118	146
YNL249C	109	162	158	278	142	114	156	147
YGR056W	533	727	553	923	787	573	638	548
YGL065C	145	258	167	290	303	161	233	174
YOR052C	925	1132	1022	2121	873	631	622	908
YGR116W	1168	1471	1097	1790	1887	1213	1389	1033
YOR343C	10	31	30	61	62	66	61	57
YGL230C	21	10	18	26	19	8	10	10
YOL159C	111	230	151	301	160	103	145	154
YBR185C	281	430	272	505	437	276	365	338
YOR010C	31	55	35	78	42	38	38	50
YDR290W	0	0	0	0	0	0	0	0
YDR019C	220	372	290	606	309	360	206	339
YBR150C	311.42	474.333	347.816	546.36	382.394	290	371.431	289
YIR042C	91	88	88	156	42	45	66	92
YFL031C-A	0	0	0	0	1	0	1	0
YER119C	156	286	267	420	198	175	234	254
YMR196W	649	1199	823	1478	851	651	606	571
YMR161W	203	248	251	394	265	213	193	309
YDR499W	232	325	233	368	316	181	236	213
YKL068W-A	353	279	198	563	486	348	262	318
YJL133C-A	222	312	397	629	176	109	220	481
YHL046W-A	1.055	0	0	0	1	0	0	0
YDL215C	3343	3821	2694	4115	3626	2433	1852	1662
YJR120W	39	29	19	32	68	55	48	21
YLL061W	445	378	333	872	494	347	294	317
YDR110W	434	589	444	760	703	550	592	559
YDR419W	200	270	248	420	264	212	264	298
YOR221C	376	473	391	646	476	352	390	426
YPL214C	351	461	448	729	426	357	432	412
YBL108C-A	3.843	21.993	13.458	26.405	12.597	8.656	7.215	13.483
YGL165C	3.042	8	2	2.014	5	0	6	3
YOL064C	310	367	380	699	451	326	365	480
YBL023C	412	509	486	675	586	491	443	466
YOR274W	243	319	271	485	384	314	307	338
YOR329C	522	747	692	1000	786	738	599	555
YLR005W	398	470	452	823	498	400	496	554
YDR124W	32	41	26	52	20	23	17	41
tI(UAU)L	0	1	1	0	0	0	0	1
YNL267W	524	613	559	960	688	510	604	611
YBR134W	0	0	0	0	0	0	0	0
YLL047W	2	0	0	2	1	0	1	1
YLR461W	2.733	0	5.328	3.666	1.11	7.139	4.35	6.383
tI(UAU)D	0	1	0	0	0	1	0	0
YLR050C	153	209	198	294	161	151	203	190
YOR124C	506	749	563	846	783	516	558	418
YDR067C	165	240	150	265	222	139	177	172
YMR056C	316	401	444	646	433	323	325	495
YHR032W-A	47.983	68	55	87	64	60	54	78
YJL044C	423	582	392	845	605	358	430	490
YPR164W	400	552	391	684	639	415	504	393
YEL060C	2148	3089	2846	3662	2561	2267	1567	1633
YHR195W	327	341	322	590	366	280	268	394
YLR101C	5.042	5	6	9.043	12	4	4.065	11.068
YBL107W-A	2.13	20.313	3.128	5.152	7.567	0	8.774	2.256
YML026C	4630.65	4677.81	4942.64	8660.53	7463.91	5201.76	5962.34	8626.19
YPR066W	38	52	77	104	43	50	59	50
YDR073W	235	311	216	470	278	211	253	339
YDR229W	274	382	306	522	389	302	326	396
YDL181W	242	290	305	504	1071	896	887	1183
YBR022W	118	173	141	271	215	139	164	163
YER177W	4764	6218	5494	11569	6246	5662	4914	7283
YML048W	1604	1831	1648	3008	1973	1640	1454	1875
YBL064C	1597	2386	2240	4107	2299	1915	1695	2666
YIL045W	40	58	54	78	55	36	58	45
YKL221W	18	24	28	67	23	11	21	36
YGL126W	224	308	317	513	260	218	253	362
YLR167W	12916.7	12415.8	13294.1	23875.2	18015.4	14189.4	14901.9	25566.4
YMR270C	252	271	238	496	384	263	275	312
YLR293C	3271	4007	3745	6907	4130	3868	3412	5940
YLR228C	137	176	161	250	253	172	214	213
YJR053W	78	69	78	155	111	91	103	60
YJL171C	634	867	688	1202	887	737	542	809
YDR374C	8	11	10	11	5	3	7	6
YKL021C	649	605	576	1005	779	652	632	783
YDL167C	964	1106	978	1721	1318	1047	1112	1150
YLR388W	1678	1714.44	1716	3089	2304	1996.44	2214.91	3300
YLR373C	228	382	241	369	426	237	356	237
YKR001C	817	1148	865	1571	1370	1046	1047	946
YKR054C	290	360	271	471	378	275	325	287
YIR034C	260	393	384	663	356	281	292	489
YGL013C	707	938	707	1243	964	573	668	550
YJR068W	383	386	405	689	459	398	345	512
YGR207C	535	703	574	1108	694	545	536	782
YDR212W	1220	1496	1275	2131	1619	1182	1195	1394
YNL052W	704	772	867	1107	4046	3150	3187	3695
YGL188C	109	105	92	155	395	292	291	337
YNL025C	83	124	78	167	132	72	93	69
YGR121W-A	1	3	1	1	2	0	3	4
YGR091W	201	232	223	382	258	189	207	245
YDL232W	56	57	78	121	46	62	52	78
YPL119C	203	276	297	382	211	156	167	135
YLR242C	42	68	44	82	77	31	56	45
YMR031W-A	1	0	0	0	0	1	0	0
YJR148W	714	852	839	1315	754	661	575	967
YJR082C	232	276	295	513	323	257	301	353
YOL087C	617	770	656	1083	815	652	597	608
YNL134C	2833	4194	3877	8022	4128	3202	2894	4691
YAL037W	25	28	29	70	33	38	25	23
YGL146C	299	329	336	569	726	524	487	609
YCL075W	0	0	0	0	0	0	0	0
YBR262C	335	377	402	805	494	371	435	741
YPL199C	313	380	340	720	435	359	445	707
YML101C-A	1	5	1	2	2	0	3	1
YFL036W	1372	1775	1376	2291	1933	1408	1398	1339
YDL209C	242	252	235	390	294	205	207	262
YIL051C	879	1391	1138	2114	1423	1286	1241	1819
YPL057C	1758	2377	1722	3841	2656	1860	1887	2438
YNR010W	79	71	69	127	81	74	70	77
YDR365C	1542	1620	1462	2822	2105	1820	1447	2036
YLR308W	4	5	6	7	3	3	0	2
YNL169C	181	173	166	272.784	199	162.797	152	156
YFR034C	361	396	476	730	434	397	354	426
YHR070W	663	746.97	777.977	1480.99	750.976	753.991	639	918
YDR460W	242	268	258	406	312	242	237	299
YNL112W	9681	8555	5347	15948	12881	10355	6210	13600
YHL047C	279.945	319	339	580	349	265	267	354
YOR360C	1983	2583	1405	3452	2703	1482	1744	1624
YOR335C	3667	4101	3392	5974	5015	4273	3656	4342
YDR354C-A	0	0	0	0	0	0	0	0
YKL100W-A	0	0	0	0	0	0	0	0
YGL251C	185	256	194	274	307	197	232	196
YER156C	779	782	790	1406	1053	905	825	1196
YPL255W	103	130	141	173	132	112	113	109
YOR095C	1056	1079	952	1833	1661	1221	1176	1517
YEL038W	360	476	491	869	386	351	332	579
YCL014W	338	431	321	504	438	349	410	334
YOL025W	179	303	209	385	254	172	249	174
YPL208W	171	240	188	287	256	178	191	217
YOL147C	227	325	341	568	219	217	253	394
YNL280C	642	774	725	1285	770	587	545	803
YDR007W	3444.86	4087.89	4812.64	6865.69	701.776	548	609.638	768.967
YIL160C	190	198	223	399	140	122	74	173
YPR089W	485	724	511	840	821	538	601	451
YBR233W	169	183	178	277	215	193	135	150
YPL122C	232	342	208	388	370	239	291	238
YKL104C	2745	4247	3243	5366	3712	2862	2383	3017
YMR313C	337	419	385	604	506	346	375	381
YGL179C	180	205	146	250	197	156	107	152
YGR120C	119	163	128	215	163	133	165	146
YML001W	334	381	419	680	477	314	410	422
YLL028W	1010	1024	785	1613	878	714	547	677
YER016W	143	160	175	270	187	162	165	237
YHR061C	127	167	108	220	153	137	150	164
YDR438W	128	198	126	233	190	131	145	192
YNL211C	46	51	24	61	70	42	59	33
YLR124W	0	1	0	0	2	1	1	0
YML058W-A	7	3	11	11	5	6	10	13
YLR026C	330	415	346	728	457	367	354	424
YJR065C	919	1347	1303	2046	1357	1274	1153	1333
YDL131W	1378.67	1559.3	1421.88	2571.07	1780.65	1599.83	1473.4	2156.83
YMR095C	32	33	45	81	11	16	14	41
YER138C	5678.63	7025.21	6274.38	12661.9	5613.99	5979.21	6423.97	3853.59
YDL033C	197	203	233	438.96	173	183	184	261
YMR255W	259	319	293	498	321	270	283	367
YHR209W	452	891	597	1226	543	323	365	529
YGL247W	62	118	97	157	155	63	106	123
YCR100C	6	27	30	50	19	25	18	26
YDR516C	778	1310	1082	1615	1015	883	774	895
Q0130	1	2	5	1	8	3	10	2
YPL233W	162	177	188	317	211	168	163	236
YOR255W	1	4	2	3	2	2	1	0
YOR063W	20551	23785	24205	44262	28063	25027	23751	40401
YOR200W	0	0	0	0	0	0	0	2.028
YGR251W	226	217	239	350	283	223	235	348
YPR047W	206	314	235	364	245	216	202	173
YDR246W-A	9	11	2	6	8	3	4	3
YDR044W	164	274	234	495	302	268	282	435
YEL016C	220	278	246	467	297	255	306	355
YAL027W	93	144	129	213	127	103.489	124	142
YKL153W	16.036	16.031	14.019	36.046	16.027	19.032	13.024	31.048
YFL019C	5	16	5	7	17	4	6	4
YMR139W	181	252	179	303	258	173	229	157
YDL080C	292	384	351	623	354	313	309	397
YOR172W	262	367	250	418	430	275	329	249
YOR105W	78.272	152.759	102.671	170.168	142.603	74.297	97.448	84.189
YJL138C	5835.98	6152.36	6098.08	11373.2	7070.94	6232.63	5185.22	7342.33
YPR143W	625	588.997	576	1123	823.995	719	616.986	928.998
YDR340W	40	148	40	65	163	50	109	54
YNL322C	853	1151	1026	1814	1102	929	922	1227
YPL090C	7063.05	7049.16	7351.9	13736.7	10720.8	8404.62	7901.67	14105.9
YPR078C	17.151	32.919	14.614	59.051	30.579	15.515	8.023	17.109
YCR075C	37	57	58	101	56	40	40	41
YFL062W	12.062	23.459	16.207	23.482	7.611	9.115	8.972	7.293
YDR171W	1328	2898	1790	2313	1442	1066	666	706
YLR439W	539	652	588	1031	906	828	712	899
YCR020C	77	129	77	162	135	72	83	121
YDR450W	4732.35	4791.19	5064.36	9459.47	7031.09	5556.24	5711.66	9474.81
YCL051W	224	289	280	433	338	261	262	325
YCR097W	171	274	175	350	465	237	410	294
YBL039C-A	10.705	0	5.396	0	14.451	14.924	0	13.035
YDR235W	140	325	137	215	306	136	279	134
YGL194C-A	20	55	31	61	52	26	51	51
YER038C	148	192	160	249	196	143	185	136
YPR125W	873.976	1050	768	1779	1259.99	879.938	888.99	1201.97
YHR049W	2085	3001	2103	4216	3209	2419	1920	3252
YBR007C	264	378	271	496	337	294	268	270
YPL001W	216	307	209	367	313	181	260	229
YJL038C	16	11	12	16	17	7	5	12
YNL319W	0	3	4	3	1	2	2	1
YPR178W	270	315	363.934	524	300	249	274	349.98
YER079C-A	0	0	0	0	0	1	0	1.015
YDR475C	331	404	363	535	413	355	327	344
TLC1	332	562	349	692	667	368	702	546
YNL159C	82	124	92	167	111	87	112	87
YAL014C	229	272	311	499	252	220	234	285
YCR020W-B	79	92	55	99	130	68	125	48
YBR243C	174	238	188	322	221	160	214	209
YLR181C	198	298	226	447	258	206	300	312
YBL056W	788	996	763	1438	1233	807	904	958
YNL075W	773	865	727	1408	1199	912	808	1180
YPL150W	357	431	406	725	451	364	393	434
YJL012C	665	838	731	1160	968	760	752	790
YJL065C	164	245.994	200.993	434.997	183	185.992	204	301
YKR020W	82	118	119	198	107	99	131	112
YMR053C	47	87.093	76.871	84.288	76.556	47	60	25
YKL066W	85	208	138	216	305	220	306	266
YMR004W	252	351	311	441	326	211	272	233
YER083C	367	473	449	830	401	372	416	512
YPL176C	517	655	638	937	665	545	548	554
YHR172W	76	101	84	124	93	84	79	51
YLR263W	563	649	526	821	1047	624	679	607
YDL240W	300	361	296	448	500	355	420	240
YDR401W	4	7.091	4	12	3	0	1	4
YGL118C	0	0	3	3	1	1	0	0
YHR013C	303	399	318	574	410	342	332	525
YOL040C	6301	7242	7263	13298	8429	8053	7152	12990
YGR072W	277	385	313	568	429	287	323	409
YCL035C	1110	1732	1664	3337	1210	1004	1190	1758
YIL023C	966	1560	1389	2523	1086	1011	834	1511
YNR073C	100.345	131.222	157.092	163.195	67.004	58.118	79.199	86.391
YPR200C	33	30	32	59	47	36	31	39
YIL072W	67	92	98	189	104	74	78	92
YLR327C	2974	3373	4968	6549	3639	2627	3980	5055
YBR229C	379	548	434	783	519	394	435	331
YML133C	21.097	16.166	43.709	34.605	39.412	87.186	25.796	20.724
YOR131C	158	205	207	387	240	173	174	238
YLR455W	226	308	233	414	331	240	247	239
YNL247W	1432	1808	1519	2665	2027	1659	1652	1942
YOR054C	229.972	312.409	311.124	434.183	270.173	169.31	239.383	266.346
YGL007C-A	2	3	3	7	9	5	5	3
YFR028C	413	526	475	770	570	454	478	494
YGR290W	0	0	0	1	3	0	0	2.04
YOR009W	105	112	103	176	116	115	88	105
YOR072W	1	3	9	8	4	7	6	4
YDR292C	600	778	561	1029	900	590	703	747
YOR161C-C	3	5	0	3	2	2	6	2
YHR126C	39	21	23	96	25	14	17	95
YMR194W	1563.72	1497.35	1617.64	3346.61	2009.64	1739.96	1792.35	2983.74
YAL016C-A	1	4	1.014	2	1	3	2.034	0
YMR167W	248	331	312	422	370	243	286	256
YOR249C	166	255	160	255	303	160	250	152
YER117W	4651.7	4169.51	4716.83	8415.39	6725.35	5294.43	5473.07	8982.35
YOR301W	102	86	83	183	105	103	99	130
YPL187W	19	34	28	25	39	20	11	14
YKL218C	144	182	158	289	178	109	128	190
YOR140W	639	724	729	1140	846	766	669	581
YDR391C	245	384	344	626	295	214	292	343
YLL063C	57	75	111	136	81	55	74	74
YAR070C	0	0	0	0	0	0	0	0
YOR276W	511.994	654.976	561	1085.97	852.972	616.996	629.998	952
YMR309C	3207	4058	2489	4390	5097	2986	3309	2257
YOR089C	650	785	722	1276	811	615	653	870
tD(GUC)N	5	2	3	10	10.954	13.057	10.453	11.285
YGR258C	806	980	763	1429	980	728	630	810
YNL146C-A	6	16	18	18	11	8	14	7
YMR180C	265	312	345	478	263	214	246	356
YGL163C	418	551	434	703	411	307	316	331
tD(GUC)Q	0	0	0	0	0	0	0	0
YDR417C	5.012	8.015	2.005	15.013	6.011	5.02	1.002	8.021
YOL131W	5	3	0	2	1	0	1	5
YOR011W-A	0	1	0	0	0	0	0	0
YPL283C	565.442	777.814	751.981	906.984	585.992	692.959	727.909	371.719
YBL021C	94	113	92	179	215	162	181	273
YHR215W	70.32	92.529	99.052	183.656	90.362	88.253	117.436	110.923
YLL045C	7796.83	8560.36	8981.13	16193.9	10846.7	9286.91	9324.79	15360.2
YLR156W	0	0	0	0	0	0	0	0
YLR007W	640	688	606	1247	626	593	510	855
YNL261W	272	403	240	563	326	247	248	258
Q0092	0	0	0	0	0	0	0	0
tE(UUC)Q	0	0	0	0	0	0	0	0
YNL305C	282	466	432	621	335	280	307	322
YJL046W	215	355	217	401	274	199	253	236
YKR078W	179	219	158	322	287	151	189	200
YOR191W	619	620	615	909	912	678	610	636
YEL074W	17	18	13	27	22	17	22	19
tE(UUC)M	0	0	0	0	0	0	0	0
tI(GAU)Q	0	0	0	0	0	0	0	0
YOL166W-A	0	0	0	0	0	0	0	0
YDR272W	591	750	743	1206	729	568	540	763
YGR289C	297	371	311	548	363	283	317	351.96
YML020W	219	276	254	383	314	258	271	204
YLR103C	161	214	179	308	182	161	138	147
YOR294W	819	947	852	1715	1014	966	812	1427
YEL062W	194	229	167	394	219	155	172	187
YPR064W	2	4	1	1	2	0	1	2
YPR031W	320	408	335	529	424	310	329	325
YLR038C	706	861	772	1116	2814	2021	2078	2125
YNL096C	3412.08	3351.36	3363.36	5894.52	4559.67	3754.75	3459.34	5442.08
YDR038C	564.605	760.755	738.893	1020.17	879.743	586.799	762.146	892.905
YPR160W-A	0	0	0	0	0	0	0	0
YDL187C	9	10	5	20	4	8	7	23.985
YBR024W	161	225	190	429	199	156	160	182
YER171W	496	643	465	864	708	501	490	563
YDL047W	810	928	904	1669	1169	919	892	1241
YML046W	245	428	218	411	557	265	381	232
YGL124C	276	385	292	474	398	241	318	278
YMR276W	1148	1518	1527	2280	1146	1071	1058	1203
YEL059W	7	10	2	11	7	3	6	6
YDL160C-A	45	50	40	85	60	59	43	52
YLR165C	117	130	109	187	158	85	110	115
YCR069W	472	654	658	987	607	482	544	661
YKL223W	0	0	0	0	0	0	0	0
YGR146C-A	0	1	1	2	1	2	2	1
YKL027W	692	715	583	1406	781	560	543	981
YJL173C	126	191	180	295	138	149	150	200
YDR152W	739	933	891	1597	1109	871	843	1155
YKL127W	113	188	146	251	177	195	180	157
YDR309C	983	1085	957	1486	1094	1101	752	877
YLR386W	245	283	223	362	361	247	292	214
tN(GUU)Q	0	0	0	0	0	0	0	0
YLR371W	582	799	655	920	903	758	683	574
YDL169C	73	157	117	198	97	69	78	105
YLR092W	87	95	87	125	109	97	102	78
YER044C	1048	1094	1019	1680	1248	830	915	1122
YMR072W	535	689	655	1306	696	533	575	833
YJR033C	246	393	318	523	372	275	297	272
YKR056W	1326	1562	1308	2586	1954	1575	1375	1791
YGL011C	1030	1293	1333	2101	1195	926	952	1100
YIR036C	290	471.984	442	796	331	275	267	450
YMR123W	229	296	226	494	282	245	250	402
YDR406W	838	1481	1051	1794	947	678	764	458
YGR073C	15	24	31.25	43.183	36	30	32	40
YGR209C	860	1190	1161	2319	933	702	884	1246
YJL150W	1	0	1	1	1	2	0	0
tS(UGA)E	1	4	2	2	3	0	0	5
YNL050C	405	486	426	829	585	455	509	639
YMR304C-A	160.714	319.144	127.409	258.472	268.16	173.328	184.009	235.038
YLR240W	208	309	272	345	268	222	288	246
YGR093W	507	644	442	872	784	565	566	551
YDL234C	531	760	634	929	643	467	492	492
YPR108W-A	0	0	0	1	0	0	0	0
YNL136W	321	320	435	738	502	429	375	489
YKL049C	164	194	166	322	178	132	165	223
YJR080C	406	550	393	769	918	663	664	721.876
YNR038W	598	791	602	1097	825	666	697	642
YGL140C	609	642	546	843	815	611	567	572
YCL029C	251	273	323	476	377	328	326	385
tY(GUA)Q	0	0	0	0	0	0	0	0
YFL038C	1448	2035	1984	3483	1962	1723	1682	2430
YJR131W	272	343	285	484	391	259	287	322
YNR012W	445	589	461	900	625	485	508	579
YNL110C	1497	1540	1275	2606	2058	1544	1322	1846
YAL068C	0	0	0	0	0	0	0	0
YDR367W	166	254	138	283	339	153	229	156
YIL053W	11659	12159	11235	28159	11195	9429	8523	20845
YPL059W	376	451	440	745	419	365	373	505
YGL253W	10083	10870	11219	18659	13848	12305	11907	16855
YHL032C	1117	1518	1383	2371	2004	1774	1660	1782
YJL010C	690	877	620	1120	930	708	696	748
YHL045W	0	7	2	3	3	0	2	1
YOR337W	1111	1266	1202	2104	1746	1400	1454	1687
YMR010W	685	1098	504	1229	953	494	647	628
YOR097C	90	116	105	171	112	82	104	114
YHR118C	167	225	170	316	236	164	215	204
YGR024C	312	430	329	576	530	267	358	316
YOL023W	346	503	398	625	479	304	398	324
YPL253C	95	147	104	180	137	81	129	88
YOR008C-A	0	0	0	1	1	0	1	0
YER154W	734	821	897	1531	878	797	733	1056
YBR300C	1	2	0	0	0	1	2	0
YEL036C	1733.85	1915	1819.86	3428.73	2291.85	2078	1779	2593
YBR260C	349	368	333	554	372	314	316	321
YPL124W	35	46	53	53	65	52	55	43
YAL042W	819	1083.98	1185.99	1781.99	1124	1000.98	1036	1528
YAL035W	2711	3164	2918	4881	3766	3149	2941	3387
YNL286W	156	209	200	351	237	157	208	274
YDR001C	2204	3022	2470	4050	2813	2234	1896	2336
YIL162W	13636	15496	16891	22029	16946	12957	15961	15951
YOL141W	136	134	127	200	201	148	153	154
YHR145C	17.082	47.111	8.424	14.152	66.906	12.996	32.694	21.818
YBR195C	189	222	194	357	225	179	219	256
YIL039W	675	754	670	1204	981	722	760	860
YGR122W	88	129	93	144	133	112	99	92
YPL092W	191	233	207	389	298	206	234	241
YGR161C-D	667.995	592.501	581.563	861.47	1019.65	461.792	930.203	310.697
YMR315W	820	1290	1105	2117	964	806	774	1089
YGR213C	9	14	12	22	5	2	3	3
YDR384C	1170	1287	1367	2087	1221	1126	933	1342
YML007W	1741	2063	1868	3071	2287	1573	1647	1690
YER063W	392	432	403	738	424	378	387	536
YDR481C	680	852	862	1301	703	702	605	725
YER014W	261	350	302	626.997	296	258	263	302
YPR041W	2161	2611	2155	4155	2955	2295	2238	3020
YNL213C	327	402	317	633	482	343	310	424
YKL006C-A	239	256	280	449	344	243	313	372
YDL159W-A	0	0	0	0	0	0	0	0
YBR058C	622	848	696	1139	877	695	741	722
YLR024C	252	308	251	417	322	206	263	168
YLR071C	545	781	534	798	878	540	678	445
YHR092C	1832.87	1406.93	905.512	2934.48	4828.95	2979.88	1770.17	3523.98
YDL199C	94	129	95	124	126	65	66	56
YHL007C	1652	1883	1781	2941.97	2122.99	1703	1690	2010
YER181C	0	0	2	1	0	0	1	0
YNL228W	1.008	3.03	1.004	9	4.019	3.017	5.032	0
tV(AAC)O	1	1.092	0	1.528	0	0	3	1.15
YDL064W	235	247	239	425	321	253	242	357
YDL031W	1423	1532	1324	2431	1904	1600	1359	1642
YMR257C	290	470	246	386	563	252	360	217
YBL108W	0	0	0	0	0	0	0	0
YDR046C	1977	2267	1826	3399	2867	2002	1729	1505
YOR253W	197	232	247	467	280	250	235	340
YOR202W	0	0	0	0	0	0	0	0
YEL010W	0	0	0	1	1	0	0	1
YGL245W	2020	2481	2206	3679	2775	2557	1974	2822
YGR006W	56	79	76	154	90	79	67	112
YGR079W	2685	3074	2634	4912	3168	2702	2192	3232
YDL119C	151	209	200	289	160	125	152	149
YKL151C	736	1263	1206	2241	878	562	670	931
YGL198W	209.984	305.996	275.975	452.96	256.979	259.987	266.99	323.977
YDL086W	1002.97	1369.99	1385.94	2440.94	1261.97	1075.91	936.949	1762.98
YBL091C-A	76	118	110	214	98	96	98	116
YLR361C-A	121	141	130	200	137	94	106	128
YBR141W-A	0	0	0	0	0	0	1	0
YOR170W	0	0	0	0	1	0	1	0
YHR038W	167	272	178	320	259	152	191	182
YML069W	632	866	696	1053	894	679	745	708
YKR019C	146	148	179	247	196	155	151	196
YJR073C	503	723	766	1157	693	481	499	653
YGR279C	2463	3015	2736	5006	3477	3277	3071	3734
YCR073C	452	832	659	928	619	481	464	494
YCR022C	0	1	2	1	1	3	0	3
YLL015W	687	976	765	1175	994	676	681	645
YNL195C	78	179	116	225	79	72	60	99
YDL134C	847.975	1052.48	883.464	1589.53	1220.14	914.337	927.386	1090.64
YFL060C	81.391	89.307	93.042	146.23	208.274	165.106	150.866	188.264
YDR173C	65	113	107	159	147	93	130	143
YMR100W	426	529	401	673	652	430	448	396
YCL057W	849	1168	1012	1596	1321	1052	1056	902
YOR335W-A	0	0	0	0	0	0	0	0
YBR072W	21128	35371	32475	61689	22776	12995	15486	20434
YBR005W	217	310	293	474	268	199	240	347
YPR123C	11.111	10.107	2.019	9.03	9.137	5.078	4.02	9.227
RUF5-2	182.018	426.911	307.031	454.428	327.259	141.393	351.929	222.033
YDL173W	397	506.983	537.992	762.975	560.972	415	435	617.989
YJR047C	12.007	16.009	20.004	30.01	4.002	13.009	16.006	34.014
YMR006C	656.392	799	753	1967.53	592	672	815.423	1100
YKL145W-A	21.078	15.693	26.569	24.607	7.329	12.787	19.281	27.143
YAL016W	900	1286	930.986	1673	1406	1000	983.966	937
YMR292W	114	166	68	142	232	101	160	152
YHR011W	131	234	192	281	205	162	178	234
YPL152W	109	166	120	172	135	94	140	127
YLR183C	97	141	120	215	89	89	90	91
YNL077W	187	270	276	361	259	237	248	263
YBR109C	747	993	882	1740	999	743	754	1124
YBR172C	1553	1968	1849	3056	2550	2207	2038	2469
YDR346C	1632	1780	1424	3153	2272	1703	1396	2189
YAR002C-A	626	854	710	1413	1006	717	765	1051
YOL077W-A	529	584	491	928	1606	1161	1231	1360
YPL029W	338	417	376	617	426	349	357	425
YHR146W	627	801	847	1742	800	664	704	1253
YNL019C	0	0	0	0	0	0	0	0
YDL242W	3	5	4	5	2	1	5	6
YBR189W	8000.75	8570.07	8169.14	15776.4	11769	9612.73	9067.12	15928.8
YER085C	9	15.966	16	20	18	12	17	15
YJL225C	855.166	1102.57	1048.62	1696.54	996.437	941.868	925.607	1148.69
YKL064W	641	873	667	1189	855	672	642	668
YLR265C	99	215	102	181	217	119	161	125
YKR022C	225	268	251	468	307	288	336	351
YLR287C	362	492	348	587	541	319	441	363
YPL174C	190	308	183	365	374	188	246	190
YOR070C	297	397	361	533	444	350	358	398
YDR403W	95	138	119	160	111	87	98	106
YOL093W	303	318	323	690	423	374	377	486
YOL042W	238	302	205	425	385	244	303	249
YIL070C	703	921	762	1469	841	754	695	817
YCL037C	30	23	36	62	52	35	36	47
YIL025C	3	4	2	11	2	5	3	3
YDR545C-A	9.75	9.534	0	37.709	0	13.7	7.711	23.818
YNR071C	21	30	13	42	45	21	25	21
YML131W	519	840	682	1176	679	526	502	529
YNL245C	255	228	227	437	274	244	233	342
YNR024W	272.943	276.643	310.921	489.903	346.777	243	283	420.85
YFL013W-A	5	3.009	0	5.01	1.003	6.019	2.018	0
tP(AGG)N	0	0	0	0	0	0	0	0
YLR329W	17	35	15	29	31	17	14	16
YPL043W	1874	1965	1648	3186.98	2564.99	2048	1508	2383.99
YCL045C	1105	1322.99	1141	1992	1602	1242	1211	1107
YBR056C-B	0	0	2	1	0	0	4	0
YKL002W	449	554	558	935	662	516	508	744
YDR328C	568	727.997	810.986	1241.99	735	689	697	942.98
YIR009W	42	70	83	130	63	67	62	72
YBR154C	1098	1236	974	2124	1517	1105	1090	1582
YLR001C	335	480	365	572	440	325	369	288
YAR035C-A	0	0	0	0	0	0	0	0
YKR101W	167	274	190	330	245	172	212	185
YMR230W-A	4	6	3	3	9	5	13	7
YER115C	145	200	169	246	256	172	204	204
YHR124W	43	44	45	91	89	53	42	65
YER148W	685.987	718	663.993	1283.99	969.995	749.984	755	1009
YCR050C	0	0	1.059	0	0	1	1	0
YMR240C	205	211	242	376	321	254	250	328
YOR303W	8745	11913	10261	22510	11086	8475	7720	12703
YIL087C	138	244	262	550	168	123	167	249
YMR192W	450	787	432	788	639	448	475	472
YCL074W	0	0	0	0	0	0	0	0
YJL221C	148.235	172.141	216.13	285.202	179.263	148.869	146.419	163.143
YMR229C	2714	2764	2089	3420	4076	2951	2684	2542
YLL038C	212	227	249	356	268	244	213	245
YOR056C	1282	1445	1328	2479	1741	1533	1322	2051
YOL108C	71	74	109	126	88	63	70	88
YOR270C	2640	3436	2607	4883	3635	2689	2696	3089
YDR106W	5	14	12	11	8	8	9	9
YOL068C	761	1016	884	1486	1033	743	811	869
YMR182C	649	680	619	1402	615	557	519	714
YBR201W	137	198	137	229	181	103	169	188
YLL043W	1035	1202	1124.71	1651	1365	1130.76	1047	1190
YDR415C	229	245	198	339	295	258	244	243
YGL161C	272	348	314	487	390	346	377	314
YOL133W	134	145	164	265	124	126	120	145
YDL074C	721	947	640	1125	1188	707	818	703
YNL263C	286	389	387	580	411	316	347	377
YHR217C	2.006	2.008	1.002	6.037	3.031	2.012	2.018	2.008
YDR128W	464	544	516	833	637	496	442	427
YOR193W	81	163	62	185	122	52	97	90
YER028C	44	49	75	108	52	61	50	77
YMR052W	74	79	66	130	84	65	66	56
YIL029W-A	0	1	0	0	0	0	0	0
YMR294W-A	0	2.003	1.001	4	3.009	2.007	2.012	1.002
YKR076W	362	588	511	1087	435	336	320	510
YDR225W	2562.3	2549.09	2601.26	5373.61	2738.17	2588	2059.89	3624.04
YDR270W	222	361	352	458	365	243	291.836	223
tL(UAG)J	0	2	0	1	0	0	0	0
YPR033C	1939	2221	1964	3518	2614	2182	1904	2639
YGR230W	101	132	119	222	114	81	129	151
YPR062W	514	690	581	1123	762	614	575	1154
YDR528W	276	334	283	352	301	290	188	125
YER173W	206	307	298	426	335.986	279	311	264
YBR026C	784	1230	998	1966	988	783	780	896
YDL185W	3936	4933	3844	7065	5199	4174	3412	4292
YBR091C	84	109	109	193	115	89	107	133
YNL094W	501	628	547	966	669	536	525	643
YGL056C	2254	2472	2296	4434	3219	2623	2134	2982
YPL227C	250	323	225	494	373	290	288	333
YLR222C-A	12	75	19	37	53	15	40	23
YDL010W	147	199	188	268	206	143	175	172
YML019W	192	271	192	319	343	206	282	257
YDL045C	269	383	305	559	406	297	336	382
YLR163C	580	705	617	996	660	584	566	639
YLR178C	769	1658	1263	2721	681	541	590	680
YKL225W	0	0	0	0	0	0	0	0
YHL002C-A	0	2.037	0	3.013	2.01	0	0	0
YJL175W	1	1.005	0	0	1.004	1.005	1	0
YBL079W	768	993	680	1186	1237	849	946	628
YNL056W	257	325	298	532	242	213	215	337
YFL001W	488	761	433	928	491	403	385	499
YDR150W	739	919	808	1222	1427	1063	1076	837
YER147C-A	8.013	4	2.007	13.011	4.005	6.016	7	4
YKL170W	277	351	313.998	563.979	305.996	325	276.998	404
YPR157W	61	74	92	119	115	97	120	92
YPR137C-B	842.128	333.529	223.411	2017.08	116.657	452.281	0	833.579
YLR384C	1449	1659	1313	2208	2129	1654	1525	1457
YPL060W	129	183	139	242	205	130	170	162
YML099C	437	567	475	737	706	453	511	495
YLR421C	407	493	413	666	481	331	300	437
YLR090W	466	550	503	897	543	443	463	573
YMR325W	1	0	0	0	0	0	0	0
YJR064W	1463	1589	1482	2424	1979	1466	1419	1826
YML022W	1026	1032	922	2009	1367	1082	1027	1585
YER046W	88	107	111	193	147	83	113	135
YMR029C	198	265	199	364	326	222	258	199
YIR030C	20	21	10	18	23	16	27	24
YKR050W	317	387	356	561	341	325	302	379
YMR121C	268.95	347.061	313.812	536.212	285.93	238.177	231.17	343.272
YGL017W	231	256	247	447	307	208	232	285
YDL150W	754.982	839	827	1390.99	1015	888	749.994	1121
YNL038W	156	226	132	256	276	159	245	153
YHR001W-A	335	508	348	573	1732	1031	1397	1146
YOL165C	1.303	1.232	3.377	10.64	1.221	0	1.292	2.473
YIL139C	103	155	101	240	198	95	155	163
YLR246W	266	296	259	414	322	222	226	275
YJR119C	452	662	371	871	714	397	491	528
YLR359W	1554	1758	1474	3480	1889	1565	1263	2036
YLR199C	416	567	535	867	549	424	430	565
YJL206C	166	228	180	272	252	176	212	139
YIL142W	1558.99	1808	1735	2875	1888	1731	1443	1938
YGL082W	216	327	253	406	344	223	257	278
YNL138W	630	870	756	1198	895	799	684	742
YOR133W	2048.16	2677.58	2623.18	4885.2	2825.57	2572.15	2612.67	4301.57
21S_rRNA	44	73	52	59	115	73	103	46
YGL142C	238	326	246	430	361	232	279	258
YGR179C	122	137	145	227	214	120	158	149
YGR102C	206	303	246	529	289	229	238	322
YBR139W	324	584	418	546	410	293	271	280
YHR188C	548	707	654	1028	837	662	640	722
YKL106C-A	1	0	1	2	3	3	3	0
YNL116W	268	380	305	598	329	286	292	313
YNL139C	340.179	475.272	329.945	580.098	562.059	348.612	474.1	288.558
YDR361C	593	672	491	973	857	572	560	798
YLR445W	1	1	0	3	2	0	0	1
YGL255W	1808	2215	2049	2649	2807	2614	2090	2248
YFR007W	146	221	175	291	204	147	174	179
YLR333C	2150	2329	2331	4245.31	3069	2353	2570	3982
YHR103W	497	556	517	844	814	616	619	552
YHL030W	498	660	508	702	485	330	398	283
YGL077C	463	522	434	591	678	476	537	479
YPL204W	1881	2287	1877	3661	2554	2140	1923	2249
YPL251W	0	1.009	1.005	0	0	0	0	1
YIL009C-A	64	66	98	157	81	67	101	96
YOR091W	921	1055	1102	1922	1100	1001	969	1502
YGR026W	275	503	293	610	425	261	336	231
YAL040C	3002	4380	3434	5889	4277	3324	3141	2949
YDR288W	159	178	181	263	225	171	229	215
YGL208W	232	333	357	529	252	222	212	237
YNL284C	471	605	478	835	635	469	486	591
YIL164C	63	79	95	169	76	74	69	126
YOL143C	1266	1461	1714	2123	1734	1379	1510	1739
YBR237W	568	634	578	872	753	572	617	586
YBR197C	156	136	147	301	147	135	141	200
YHR147C	381	518	469	863	543	373	475	507
YJL093C	343	520	423	691	419	436	372	417
YPL126W	2541	2884	2017	3847	3491	2466	2272	2420
YMR317W	15	13	10.003	12	8	9	3	8
YOR251C	384	437	451	816	501	388	415	559
YPR181C	1490	1906	1705	2937	2021	1824	1683	1663
YCL008C	161	271	210	389	236	231	196	258
YOR107W	616	597	396	1099	712	515	370	488
YML005W	249	297	253	461	348	247	275	262
YNL215W	270	343	308	520	354	319	298	423
YCR075W-A	45	66	69	109	64	51	48	84
YDL059C	58	71	62	130	65	48	57	61
YOR204W	1843	1894	1461	3280	1997	1690	1351	1859
YEL012W	364	427	505	663	465	365	377	450
YBL040C	237	362	222	401	403	169	341	227
YPR043W	3556.75	3953.44	4006.34	7418.54	4848.93	4164.78	4268.89	7488.26
YDR382W	3713	4816	4282	8013	5698	4432	4635	8278
YDR483W	2009	2194	2032	3788	2548	2293	1951	2671
YER061C	217	235	244	515	239	187	179	284
YLR022C	223	297	245	537	260	238	281	397
YLR402W	61	44	60	93	49	63	57	50
YLR073C	371	405	417	805	468	391	407	628
YER183C	141	153	179	277	178	151	172	244
YHR090C	309	292	287	563	398	318	269	339
YOL021C	1290	1409	1187	2142	1547	1426	1105	1545
YHR030C	1357	2478	1527	3099.87	2214	1751	1557	2132
YBR295W	432	631	530	869	527	479	397	481
YKL018W	214	279	218	489	336	257	251	305
YIL011W	43	60	47	88	35	32	23	27
YEL034W	9702.93	11089.9	11933	19294.9	13827.9	12265.9	11824	18135.9
YHL015W	5534	5529	5665	11026	7599	6371	6681	9887
YNR050C	290	353	324	669	366	314	326	668
YDR134C	1299.45	1517.48	1160.74	2268.8	1198.47	1059.27	881.96	1082.67
YKL208W	121	148	128	219	142	122	133	145
YGR004W	150	152	106	206	165	125	137	164
YML110C	813	1187	1092	2195	1016	717	774	1046
YGL048C	1199	1515	1384	2255	1231	1137	1022	1204
YGL243W	220	267	206	377	322	218	255	270
YKL106W	304	391	379	583	448	348	364	433
tN(GUU)N1	9	9	9	37	7	10	14	26
YPR029C	557	933	555	941	928	541	729	567
YJL034W	3727	6030	4681	6563	5037	3530	2874	3805
YFL048C	569	730	676	1081	926	656	648	773
YLR117C	526	617	496	833	741	496	508	565
YOR176W	300	390	317	707	351	289	285	386
YOR109W	567	746	576	885	823	607	621	473
YBL089W	169	191	144	300	194	132	188	169
YDL084W	1682	2239	1660	3350	2608	1896	1849	2334
tC(GCA)Q	0	0	0	0	0	0	0	0
YGL116W	257	368	311	516	327	298	296	306
YNR034W-A	2145	2943	2789	5108	3511	1805	2417	2301
YCR024C	166	292	205	308	231	117	174	145
YIL102C-A	51	70	68	95	84	47	68	54
YMR102C	534	664	581	966	638	442	522	589
YCR071C	235	321	292	474	288	251	246	404
YDR175C	432	514	471	860	545	440	444	528
YOR189W	135	175	170	346	201	174	185	252
YOR154W	366	483	329	614	609	422	493	360
YPR121W	293	319	304	478	319	270	272	324
YBR070C	82	126	100	183	62	96	88	115
YOR396C-A	0	0	0	0	0	0	0	0
YLL017W	12	4	4	8	9	6	1	7
YDR351W	680	1128	808	1352	1178	805	882	800
YNL315C	507	607	588	1018	655	481	552	728
YPR174C	107	136	134	232	151	161	97	139
YJR045C	8146	12058	10732	15630	9798	8595	6916	7247
YMR008C	972.608	1406	1243	1731.47	1363	1040	1113.58	934
YDR349C	921	1101	1079	1804	1164	907	950	1094
YDL171C	1789	1938	1776	2576	2261	1861	1776	1799
YKL062W	977	1482	1168	2134	1119	822	859	844
YJR010W	164	189	172	408	244	172	154	204
YJL218W	15	31	26	23	26	26	30	28
YIL126W	920	1008	910	1481	1288	994	931	954
YDR093W	489.221	545.609	496.267	735.284	705.921	616.532	505.94	540.918
YMR282C	286	359	258	449	635	464	509	461
YIL109C	1300	1979	1606	2565	1831	1514	1346	1454
YFL022C	2131	2328	2413	4186	2800	2383	2295	3226
YPL109C	171	221	181	282	280	183	264	179
YJL156C	418	600	433	766	677	436	479	426
YNL071W	1459	2011	1838	3605	2029	1761	1648	2312
YMR088C	348	420	372	609	692	467	547	459
YGR211W	1307	1535	1385	2545	1641	1594	1198	1799
YKL139W	380	602	386	720	596	363	469	409
YJL069C	1009	1171	928	1712	1358	972	952	1194
YDR323C	97	117	95	160	164	106	165	145
YDR344C	8	3	6	8	4	4	5	3
YJL016W	412	674	507	783	503	330	377	347
YDR444W	347.986	422	393	638	536	416	451	483
YPL189W	59	72	54	82	82	40	46	46
YLR285W	280	429	260	569	442	296	359	421
YLR267W	137	220	163	268	135	58	105	156
YDL219W	94	139	89	176	162	96	154	125
YNL017C	1	3	2	9	4	4	2	2
YCR024C-A	733	1627.4	819.839	1553.77	1668.47	799.304	1327.52	847.42
YCR024C-B	771	3430	943	1932	2422	692	2439	1050
YKR024C	1110	1226	994	1890	1479	1174	890	1175
YBR156C	147	218	168	290	173	140	165	162
YOR076C	189	325	208	314	337	198	263	172
YEL059C-A	101	110	127	185	87	89	90	132
YDR405W	510	718	627	1233	578	561	439	741
YOL091W	49	91	40	79	133	55	98	53
YCL031C	745	1012	648	1197	1268	707	857	856
YIL027C	159	216	120	249	278	113	225	134
YLR459W	191	328	176	322	318	159	311	149
YNL243W	882	1103	1170	1651	1538	1441	1414	1365
YNR026C	484	637	547	995	635	489	498	682
YHL044W	46	64	36	84	41	20	32	18
YPR204W	2079.29	2850.83	2499.28	4115.31	2669.17	2553.85	2437.79	3129.07
YNL297C	326	565	297	495	640	349	436	250
YBR170C	344	463	426	676	387	283	297	271
YGR149W	208	355	207	332	318	156	194	120
YDR458C	550	681	487	853	942	565	641	555
YKL193C	220	416	295	534	350	212	300	257
YPR099C	1.004	6	3	11.057	9.128	2.022	3.05	10.06
YOR135C	0	0	0	0	2.004	0	1.004	1
YLR310C	985	1274	959	1305	1625	1031	1142	793
YNR008W	253	360	277	490	326	255	299	349
YJR150C	0	2	3	4	1	0	0	0
YBR301W	1.365	1.044	2.438	3.769	0	1.278	5.105	1.26
YLR003C	558	742	448	938	851	462	668	613
YER113C	323	460	355	551	567	439	464	364
YHR122W	339	371	389	685	428	341	376	531
YHL017W	301	378	295	557	452	310	331	312
YJR010C-A	56	75	59	140	93	77	62	87
YIL085C	549	671	534	1016	747	603	558	630
YMR190C	302	350	329	484	357	319	252	275
YLR325C	3695	3735	3675	7130	4887	4194	4071	6844
YCL076W	0	0	0	0	0	0	0	0
YOR272W	1077	1206	1108	1836	1449	1184	1008	1438
YOR058C	252	314	242	369	317	217	279	193
YER172C-A	0	0	0	0	1.014	0	0	0
YAL064W-B	13	15	22	23	9	19	16	12
YDR413C	5.027	3.038	2.019	8.028	8.035	1.011	5.015	5.036
YBR203W	934	1398	984	1580	1233	768	913	643
YAR029W	0	8	5	10	9	5	4	0
YNL238W	817	932	796	1450	1139	824	794	971
YJL198W	1209	1377	1244	2257	1312	1229	1049	1408
YOL135C	131	132	146	236	145	126	144	190
YOR323C	805	985	1018	1700	1149	1041	952	1452
YLL041C	1001	1290	1377	1836	4757	4267	4526	4288
YKR074W	381	437	333	648	524	370	485	458
YMR274C	73	93	73	109	115	75	72	92
YER026C	327	477	406	591	470	294	388	315
YMR201C	206	277	264	425	265	258	252	298
YLR069C	999	1320	1286	1779	1256	1168	1080	1131
YML042W	358	497	471	542	343	225	244	237
YMR050C	220.669	419.701	574.463	1002.91	98.004	398.601	422.996	17.115
YDR069C	167	256	179	218	238	140	189	157
YOR298W	14	24	17	33	33	18	16	21
YEL066W	227	286	307	502	298	300	303	488
YPR035W	19616	24942	22845	41083	23366	20933	15032	25743
YDR014W	87	165	67	159	168	98	151	58
YDR227W	465	603	523	765	806	524	538	439
YPR060C	203	278	205	371	320	204	220	298
YMR037C	556	776	604	890	758	515	565	433
YCR038C	125	125	129	231.338	134	106	163	130
YNL257C	197	283	253	317	312	182	242	172
YCR072C	910	1050	900	1713	1188	1091	833	1242
YBR093C	354.176	683.183	876.67	746.652	288.816	357.459	295.23	282.783
YNL092W	29	69	56	89	46	29	50	48
YGR045C	2	4	4	1	13	4	12	7
YAL037C-B	17.05	28.066	15.033	59.071	27.055	14.038	17.037	27.057
YLR134W	63.096	103.15	90.148	102.152	86.118	84.128	76.142	69.077
YOR218C	0	1	0	1	1.006	0	0	1.007
YMR203W	1208	1550	1480	2343	1454	1318	1254	1492
YKL096C-B	8	2	1	7	4	1	2	3
YPL225W	694	840	722	1311	1052	686	762	932
YPL270W	522	638	574	833	780	587	643	646
YDL012C	161	211	199	368	194	162	190	257
YDR218C	9	22	21	34	31	12	26	20
YLR299W	745	876	802	1318	651	636	508	711
YFL003C	24	56	31	63	46	33	46	48
YPL051W	153	204	170	257	216	161	139	189
YNL054W	494	574	500	812	633	510	455	448
YDR156W	287	373	371	651	332	320	306	441
YPL062W	1	2	2	1	1	0	0	2
YPR155C	164	247	177	332	325	178	253	204
YOR137C	132	231	203	264	191	137	162	122
YKL123W	62.926	99.525	75.01	93.422	99.762	70.255	69.058	87.384
YKL172W	1744	1921.72	1693	3308	2459	1808	1595	2519
YNL336W	284.498	402.864	314.339	488.712	347.815	240.338	223.075	211.235
YDR305C	108	155	124	188	176	119	152	143
YJL057C	161	277	260	342	252	195	222	172
YPR100W	359.996	496	461	812.943	602.872	475.978	512.95	646.94
YDR358W	110	229	173	245	164	145	156	134
YJL152W	6	3	5.012	7.014	0	7.009	1.004	4.006
YLR096W	864	960	841	1252	1052	917	797	815
YDR194W-A	0	0	0	0	0	0	0	0
YKR052C	99	138	106	148	155	88	108	102
YLR427W	413	520	504	785	561	492	439	460
YDL152W	5	1	2	0	4.029	2	2.024	3.011
YGL015C	10	2	6	14	3	9	5	11
YEL064C	87	124	92	152	138	100	99	64
YMR127C	159	222	180	325	291	207	230	229
YIL140W	720.78	1008.79	854	1273	848	810.864	731.838	727
YOL163W	21	26	34	41	24	9	12	23
YLR197W	3476.98	3807.94	2961.97	5722.95	5116.99	3491.99	3356	3836.96
YBR213W	82	119	107	183	104	106	88	108
YAL064W	2	3	4	2	3	2	4	1
YJL204C	140	299	130	270	295	131	226	172
YLR244C	1436	1611	1472	2731	1575	1474	1278	1811
YJR084W	232	268	217	417	281	241	277	313
YLR233C	108	155	102	184	207	131	176	116
YDL238C	91	112	137	191	110	87	80	92
YGL084C	257	392	252	480	446	281	354	263
YLR382C	534	796	645	980	694	641	609	545
YLR154C-H	0	0	0	5	0	0	0	0
YLR154C-G	118.473	88.281	143.324	183.599	103.699	91.604	84.004	117.757
YGR238C	126	145	115	191	150	121	127	99
YDR363W	284	355	263	525	347	276	265	300
YNL114C	16.164	21.178	10.052	54.096	31.101	20.068	14.097	29.193
YNL163C	1387	1607	1296	2637	1746	1413	1177	1673
snR55	1	6	3	0	1	0	5	0
snR54	7	15	1	8	15	2	10	2
snR57	5	21	3	2	11	0	7	5
snR56	0	1	0	0	0	0	0	0
YHR009C	592	783	737	1445	778	646	575	1008
snR50	4	11	12	16	11	2	11	9
snR53	0	0	0	0	0	0	0	1
snR52	0	0	1	2	1	0	1	0
YFR050C	896	1110	1135	1891	992	836	854	999
snR58	0	0	0	0	0	0	0	0
YLR331C	0	2.013	1	9.22	2	0	2.014	3.053
YNR069C	59	96	95	137	158	114	131	114
YOL058W	3365	3270	3829	5793	7436	6355	6261	8215
YAR019C	174	301	230	347	269	225	230	178
YOR024W	0	2	3	1	1	1	2	0
YML129C	236	272	325	581	255	245	282	377
YGL257C	279	462	300	560	511	330	403	351
YGR020C	762	800	757	1452	872	770	723	1160
YOR093C	385	501	323	556	645	391	454	282
YAL046C	128	149	167	291	216	201	198	325
YOR392W	10	12	10	22	11	8	11	12
YAL039C	1634	2182	2131	4050	1421	1270	1284	2333
YGR100W	444	678	492	849	674	525	552	520
YLR403W	1013	1153	1000	1582	1303	1048	1077	971
YOL118C	3	3	8	7	9	7	11	6
YDR286C	101	118	84	187	103	83	99	127
YHR141C	4366.05	3902.55	4455.3	7793.94	6409.1	4658.12	4966.2	8808.63
YPL128C	281	327	319	483	361	372	340	415
YJL091C	77	117	71	138	127	65	123	78
YBR191W	4465.77	4670.17	4799.14	9090.94	5911.23	5385.84	5038.42	8571.74
YDR380W	3391	4463	3487	5240	8768	5423	7811	9957
YGR191W	1636	1862	1623	3349.99	2018	1795	1552	2120.96
YGR047C	321	483	331	536	495	326	351	270
YDR485C	684	758	680	1119	833	609	593	720
YPL239W	509	589	559	1051	737	625	518	944
YPR183W	625	843	791	1521	676	698	680	1095
YOR206W	2005	2434	1556	2956	3142	1957	2087	1945
YEL049W	36.737	50.761	55.023	83.722	42.424	26.729	28.285	46.938
YOR391C	110.406	163.68	173.934	317.395	115.88	92.515	82.767	113.521
YDR525W-A	124	148	105	184	159	96	168	102
YBR089W	0	0	1.008	2.008	1	1.002	0	2.007
YLR075W	15102	15213	16299	29418	19242	16431	16113	27139.9
YBR054W	2732	4881	4223	5326	7266	5947	4418	2776
YLR020C	363	442	332	665	526	378	427	395
YNL217W	240	319	291	451	462	384	378	475
YLR404W	82	100	87	147	95	66	90	88
YLR154W-A	0	0	1.126	2	1.038	0	0	1
YIL013C	182	215	194	345	162	156	175	251
YPL206C	452	665	612	1009	604	501	609	575
YDL060W	1791	1960	1762	2947	2337	1988	1600	2131
YBR293W	301	378	302	538	435	311	313	315
YNR052C	518	597.322	532.429	986.489	712.91	541.441	502	663.138
YHR032W	834	886	909	1693	925	826	714	996
YEL032W	968	1155	1070	1721	1291	1203	919	1019
YOL076W	213	341	212	370	440	203	330	203
YDR136C	0	0	0	0	0	1	0	0
YHR203C	6940.17	7239.76	7753.07	13444.9	9357.98	8324.6	7801.98	12250.5
YJL136W-A	0	0	0	0	0	1	0	0
YML112W	199	311	230	387	263	209	205	266
YLR154W-C	4.064	11.132	3.036	9.032	11.14	3.046	9.066	1.007
YGL241W	163	298	197	300	330	210	279	225
YDL071C	0	1	4	8	4	4	3	4
YPR176C	239	273	284	481	273	273	282	316
tS(UGA)Q2	0	0	0	0	0	0	0	0
YDR057W	350	432	345	658	485	357	398	375
YJL036W	292	389	374	512	366	306	272	272
YDR521W	0	0	0	2	0	0	0	0
YER009W	744	1153	779	1628	1231	800	1084	1225
YLR115W	432	559	457	742	511	427	443	367
YLR140W	1.381	1.18	0	3.297	0	1.23	0	0
YGL114W	573	645	614	1020	772	655	692	693
YER167W	1002	1311	1185	1962	1311	1101	971	1185
YMR104C	822	1496	1169	1711	1143	888	959	753
YER185W	8	24	12	16	20	14	12	19
YDL195W	1184	1740	1319	1993	1728	1450	1362	1064
YNL199C	453	605	611	976	672	548	576	706
YCR026C	771	994	907	1583	1005	798	769	865
YBL052C	273.921	352	256	453	465	280	396	321
YBR076W	8	16	11	15	9	3	5	9
YNL317W	247	280	244	472	286	277	224	300
YLL019C	1458.87	1539.49	1518.47	1890.57	2167.45	1773.01	1634.22	1471.67
YOR156C	216	234	236	356	228	190	205	209
YHR052W	1777	2087	1386	3012	2616	1683	1515	1905
YKR026C	476	573	450	963	667	458	467	617
YJR043C	174	222	174	315	227	198	203	195
YJR012C	66	90	109	165	61	61	88	118
YKL060C	42077	58229	55173	107100	57931	54292	49504	81062
YCR044C	201	276	240	368	282	223	238	265
YKL035W	401	911	554	1057	505	490	360	414
YLR264C-A	1	10	0	2	4	1	4	3
tQ(UUG)B	0	0	0	0	0	1	0	0
YNL073W	701	970	953	1498	797	699	775	883
YMR280C	232	315	252	344	821	487	574	436
tQ(UUG)L	0	0	0	1	3	0	0	0
tQ(UUG)Q	0	0	0	0	0	0	0	0
YFL020C	17	34	29.167	47	32	23	32	37
YNL328C	22	31	34	45	25	22	21	28
YJL014W	1427	1656	1440	2646	1945	1630	1362	1818
YMR031C	1030	1137	1041	1316	1473	1136	961	813
YOR174W	189	243	196	362	275	260	215	327
YPR149W	1483	2568	2399	3198	2263	1488	2193	2026
YNL015W	823	1024	1007	1994	1381	1202	1119	1555
YCR084C	1118	1387	1273	2111	1407	1391	1227	1288
YHR178W	210	242	248	342	233	205	214	207
YHL050W-A	0	0	0	0	0	0	0	0
YDR260C	121	173	192	261	156	142	139	177
YLR283W	114	177	165	208	199	99	178	161
YPL170W	628	906	865	1602	629	609	647	1058
YPR001W	124	113	153	221	101	85	86	136
YDR204W	152	208	243	344	182	144	171	189
YBR085C-A	863	1242	1109	2244	864	629	688	1061
YDR251W	544	781	542	830	744	459	537	466
YNL048W	291	449	365	575	636	429	439	433
YML057C-A	0	3	2.016	5	0	2	2	2.014
YOR074C	132	205	157	257	150	130	138	135
YPL028W	2114	2391	2542	3858	2755	2397	2322	3039
YJR152W	149	173	158	232	198	148	126	141
YKL025C	362	538	405	681	530	345	476	374
YAR008W	97	134	99	186	133	106	107	95
YOR003W	127	191	165	255	173	122	134	157
YOL097C	1009	1230	1200	2101	1405	1186	1146	1664
YOR110W	210	278	245	420	337	241	240	298
YDR407C	301	555	314	531	600	332	476	248
YNR020C	225	262	234	460	316	240	220	347
YBR258C	88	106	101	160	112	82	92	114
YNL146W	7	25	5	13	22	3	15	5
YFR019W	442	589	493	685	563	420	445	328
YLR262C-A	698	599	714	1122	950	717	873	1137
YIL115W-A	1	0	0	1.013	0	0	0	0
YBR223C	152	178.961	185	305	171	151	142	136
YNL241C	1805	2610	2479	4331	2161	1783	1765	2506
YJL154C	587	920	651	1158	862	569	609	546
YDR091C	1625	2137	1581	2817	2482	1618	1758	1602
YJL123C	910	1146	1045	1903	1195	984	1017	1337
YHR066W	1406.03	1508.55	1209.68	2429.37	1973.39	1382.4	1292.41	1728.46
YPL047W	114	101	112	197	122	106	96	119
YER086W	2325	2497	2463	4765	2527	2453	2068	3291
YLR287C-A	3633.51	3640.35	3595.06	6610.74	4844.18	3796.58	4126.37	6475.31
RPR1	1	6	2	2	6	5	9	8
YBR176W	140	180	166	243	189	128	155	188
YDR207C	392	445	476	846	491	475	464	526
YKL125W	799	923	752	1113	930	688	626	828
YDR373W	321	440	395	670	487	320	489	546
YGL238W	712	1307	617	1145	1385	642	940	596
YLR190W	469	654	561	837	852	697	632	602
YNL128W	44	52	53	78	40	39	50	56
YLR312C	339	401	387	494	507	359	346	288
YKL191W	778	963	848	1608	1185	1041	962	1341
YNR006W	483	762	665	955	673	539	584	523
YHR120W	283	362	317	530	430	319	319	326
YAR050W	298.65	406.144	351.653	349.293	288.272	271.912	93.822	104.927
YOL137W	234	356	232	449	463	309	356	340
YDR530C	204	262	243	425	327	249	281	418
YER111C	230	351	199	370	362	199	256	166
YER144C	609	876	684	1380	750	601	641	699
YOL039W	3124.79	3307.41	3224.86	6227.16	3983.16	3482.21	3696.47	6216.3
YIL083C	269	359	316	548	478	347	396	451
YHL011C	2047	2302	2063	3950	2659	2127	2101	3061
YFR010W-A	0	1.048	0	0	2.102	0	2	3.203
YGR184C	886	1226	845	1256	1308	870	999	705
YMR303C	1448.26	1201.11	1022.88	2137.48	1239.96	866.66	534.675	1063.17
YDR307W	122	256	129	229	214	138	220	123
YDR411C	244	262	298	385	288	236	251	289
YBR205W	314.395	451.7	390.644	677.889	481.425	399.806	429.097	476.007
YOR321W	116	136	129	210	160	132	164	141
YMR186W	11138.4	19460.2	13297.4	19868.8	14796.6	11543.5	9065.94	8897.23
YMR278W	435	565	537	907	497	423	429	395
YLR136C	7	20	9	33	22	13	18	41
YGL260W	0	0	0	0	0	0	0	0
YMR207C	369	446	414	608	603	468	490	454
YML015C	349	409	395	695	497	383	398	510
YOR197W	543	758	668	1111	855	786	702	892
YKR089C	599	744	683	967	903	683	612	569
YDL041W	2.085	5.094	0	3	1	0	1.017	4.072
YKR072C	1283.7	1667.59	1306.88	2346.7	1806.83	1582.69	1246.58	1723.65
YDL014W	4140	4873	4550	7843	5546	4771	3989	6354
YML040W	0	0	0	0	0	0	0	0
YJL127W-A	0	0	0	0	0	0	0	0
YER079W	152	217	190	395	143	116	147	188
YER024W	972	951	1307	1267	850	612	515	516
YOR230W	3680	5437	5123	8563	4038	3331	3207	4642
YGR234W	3793	4047	4723	5033	19362	16072	16841	14546
YMR178W	232	278	233	472	262	218	283	233
YPR037C	246	336	310	563	292	261	236	390
YEL068C	58	76	70	129	85	73	85	127
YNL090W	91	126.994	125	246	120	108	120.943	168
YOR307C	359	475	350	639	522	380	420	379
YMR225C	313	353	356	658	462	340	322	445
YBR095C	269	380	237	491	482	353	346	372
YDR036C	563	672	615	1011	991	821	740	737
YGR043C	834	1298	1101	2652	952	612	573	835
YPL223C	1071	1277	1244	4095	959	497	456	1515
YPL272C	82	182	108	139	372	246	244	160
YPR002C-A	19.592	43.559	31.621	33.291	52.151	16.671	42.352	28.646
YOL002C	981	1364	674	2211	1401	986	771	1300
Q0032	0	0	0	0	0	0	0	0
YEL032C-A	1	0	0	0	0	0	0	0
YFL005W	554	661	581	1053	808	600	641	778
YCR010C	73	35	61	49	31	21	22	27
YMR152W	405	567	393	715	570	357	377	369
YDR154C	2632.98	4404.09	3912.74	7684.48	2991.71	2294.45	2407.63	4191.39
YMR125W	876	1372	729	1273	1744	951	1201	734
YJR031C	292	478	309	508	423	288	366	267
YCL026C-A	3	6	6	3	8	7	7	4
YCL026C-B	131	237	186	257	208	201	156	145
YGR118W	3994.96	3960.19	4372.11	7743.23	5834.47	4734.59	4546.67	7898.09
YJL055W	623	896	790	1434	779	690	704	1024
YPR102C	4382.81	4610.99	4748.5	9404.66	6181.5	5473.63	4931.79	9677.19
YNL334C	75.609	88.693	83.958	156.77	139.726	170.894	182.134	196.736
YGL123W	10990	11614.7	11842	22015.7	15831.9	12904.9	12810	21086.6
YPL064C	271	357	319	614	336	327	318	425
YPL086C	778	958	769	1286	1105	865	814	999
Q0250	1	5	0	0	4	0	3	2
YPR153W	48	52	50	129	72	62	73	57
YMR042W	125	143	173	274	161	146	131	185
YLL003W	387	556	395	531	565	336	441	384
YER042W	212	248	198	357	226	119	128	125
YDR109C	418	493	487	815	559	482	488	476
YDR221W	380	432	420	640	457	353	406	406
YLR109W	4253	7635	6496	13684	3499	2654	2500	5945
YKR009C	269	293	263	427	690	537	395	412
YMR078C	199	220	211	314	214	211	209	188
YLR094C	547	700	685	1014	882	751	783	881
YBR037C	202	286	261	432	165	138	189	187
YLR041W	11	12.524	11	29	24	13	18.74	22
YJR060W	150	162	164	234	176	120	153	146
YNL161W	591	722	632	1035	819	655	620	618
YIL146C	250	323	266	463	380	296	250	266
YLR195C	395	617	451	787	651	428	535	520
YJL202C	1	0	1.022	1.01	4.086	1	1	0
YAL066W	0	0	0	2	0	0	2	0
YCR081C-A	0	0	0	0	0	0	0	0
YLR231C	367	512	421	758	538	445	436	502
YKL016C	883	1109	999	1627	3503	3078	3199	3550
YPL111W	764	725	871	810	953	897	658	740
YKL174C	330	451	333	540	563	374	431	374
YKL121W	246	418	359	545	408	262	318	245
YLR380W	447	578	497	925	554	503	393	647
YOR142W-B	3599.16	5840.63	4066.02	6478.93	5731.66	4316.26	4736.08	3341.57
YMR012W	2250	2799	2055	3378	4368	3166	2978	2438
YER093C	355	501	331	609	596	411	431	325
YOR032W-A	7	8	7	14	7	4	3	6
YDL201W	494	691	514	1032	775	599	556	953
YDR468C	264	326	298	505	385	253	309	348
snR73	2	6	2	5	3	1	5	2
snR72	2	3	0	1	7	0	5	0
snR71	1	4	0	2	4	1	0	2
snR70	12	22	21	33	16	10	17	19
snR77	3	16	5	3	11	0	7	0
snR76	48	31	42	78	52	30	39	60
snR75	1	6	5	3	3	0	8	2
snR74	0	4	0	2	4	1	3	2
YFR003C	134	164	146	251	134	91	118	132
snR79	0	0	0	0	1	0	1	1
snR78	0	3	1	0	1	1	0	0
YIL033C	1077	1462	1398	2558	1176	992	896	1369
YOR368W	83	124	109	204	142	96	121	109
YGR128C	1001	1389	820	1516	1507	950	1234	1015
YIL048W	450	649	396	695	713	432	515	337
YIL142C-A	1.005	0	0	0	0	0	1	1
YLR337C	465	740.99	636	865.984	607	642.967	508	537
YOL056W	122	184	168	303	212	169	186	253
YFR052W	661	918	735	1334	850	562	695	601
YGR088W	972	1766	1253	2440	1839	965	761	894
[truncated: 4,845 more rows]

## Sheet: pam.metafile.gene.readCounts.4h
	I_pam4h	II_pam4h	III_pam4h	IV_pam4h	I_WT4h	II_WT4h	III_WT4h	IV_WT4h
YAL008W	903	578	891	642	681	243	665	430
YBR255W	781	387	610	427	555	196	571	328
YGR164W	8	4	3	6	2	2	5	2
YGR131W	37	22	16	27	29	14	45	22
YNL003C	594	307	424	380	530	175	466	333
YBR135W	790	361	540.956	669	795	381	805	654
YBR160W	1489	721	1156	895	1039	449	1019	578
YJL082W	2453	1457	2149	1269	2043	771	1949	792
YJL142C	57.103	28.357	54.868	28.542	57.867	26.971	69.96	35.667
YPL191C	223	186	221	140	224	82	226	129
YGL215W	6195	3223	3657	3413	4822	1460	3869	2681
YKL074C	1218	583	793	713	1006	364	1048	669
YJL077C	2	1	5	0	4	3	9	2
YKL096W-A	43879	19864	34069	34951	28251	13531	27425	18839
YIL124W	855	478	792	465	805	343	813	384
YLR364C-A	0	0	0	2	0	0	2	0
YIL171W	1	0	1	0	1	0	1	0
YPL039W	720	321	510	450	537	175	485	356
YNL170W	22	22	26	8	21	5	20	17
YGL141W	1019	620	754	482	759	236	633	390
YJL179W	603	269	487	407	461	141	491	320
YDR316W-A	0	0	0	0	0	0	0	0
YDR316W-B	8063.6	2695.11	6624.62	5075.56	3726.32	1656.12	6584.9	2402.46
YKL083W	27.05	4.004	2.004	11.045	2.009	7.015	8.032	2.008
YBR152W	431	173	282	263	299	116	283	201
YKL029C	9276.99	4253	6074.99	7563	5884	2558.98	4448	4539
YPL166W	188	138	170	73	133	51	96	57
YKL052C	760.657	361.831	550	538.928	530	227	520.773	351.72
YHR025W	2462	1008	1746	1829	2042	971	2230	1652
YOL034W	1161	575	863	580	1178	353	1001	569
YBL008W	1055	592	772	572	881	315	950	592
YIL062C	1387	731	1319	974	1068	572	1244	757
YCL023C	0	0	2	0	0	0	0	0
tC(GCA)P1	1	0	0	0	0	0	0	0
YOL116W	429	211	339	250	334	162	422	280
YDR196C	755	311	602	467	515	202	535	316
YNL255C	5051	1865	2959	3292	3193	1322	3137	2583
YNR032W	588	230	375	319	425	168	423	275
YNR045W	773	365	573	432	617	262	663	376
YML105C	1411	611	897	912	1133	485	1089	774
YNL288W	1130	521	791	691	828	327	795	514
YIL059C	296	141	252.931	180.898	140	72	155	108
YIL004C	622	303	549	465	497	193	519	352
YNR018W	7076	2633	3887	4922	4006	1838	3940	3314
YPL144W	304	136	242	249	214	77	282	180
YFR047C	1201	572	1009	929	1034	480	1104	767
YER087C-B	1185	524	877	887	1050	484	1233	987
YHR078W	710	420	610	384	579	172	602	379
YIR023C-A	4	0	2.064	0	2	1	0	2
YJR115W	100	44	114	49	63	24	74	48
YLR355C	21958	8834	14032	15436	14031	6494	13084	10005
YGR099W	702	290	535	452	498	213	531	308
YLR300W	39123	18936	26331	25485	23628	9698	22066	16876
YCL028W	2185	1025	1664	1521	1897	816	1942	1249
YJR140C	867	567	617	444	879	261	716	469
YOR033C	1624	576	868	765	1023	387	948	501
YOR062C	377	168	275	233	187	83	218	128
YBR043C	1791	826	1308	1037	1298	513	1449	909
YHR112C	1366	727	1204	1028	959	424	1147	790
YLR011W	262	100	178	148	167	64	168	79
YIL044C	839	386	579	519	763	255	598	461
YNL197C	2410	1179	1566	1298	2120	734	1887	1165
YKR103W	303	156	240	151	274	81	237	134
YLR133W	625	320	566	360	761	307	835	488
YER121W	120	51	115	74	82	32	85	59
YCR046C	1222	560	943	888	804	406	809	573
YNL144C	1455	634	969	768	765	321	910	536
YKL204W	2026	883	1285	1044	1500	619	1298	795
YOR266W	616	313	394	337	516	172	460	257
YDR393W	769	403	517	410	601	220	552	300
YGL171W	2319	1058	1352	1323	1667	571	1492	1097
YPR194C	1391	983	1491	739	2461	931	3817	1776
YGR019W	2602	1424	2235	1615	1301	565	1602	961
YBL033C	6691	2580	3828	4470	2798	1421	3463	2614
tE(UUC)G3	3	0.5	3	1	3	1	3	1
YJL188C	59.006	12.002	11.002	13.003	13.002	22.012	16.002	16.004
YLL057C	126	47	68	78	50	30	52	37
YPL060C-A	23.046	33.986	33.805	16.758	17.278	5.129	5.745	0
YBR296C	174	89	140	100	156	52	101	87
YNL277W	253.853	98.411	155	128	228	74	111.295	73
YMR040W	233	153	282	259	296	111	427	496
YDR077W	137446	79609	124291	96359	92701	43561	101499	55793
YMR266W	4173	2349	2432	2176	2354	774	2212	1599
YKR064W	830	540	611	421	780	194	689	392
YPL089C	4286	2344	3201	2717	2617	1203	2629	1894
YGR277C	771	349	587	581	587	204	586	420
YDL139C	329	154	219	195	166	75	187	144
YDR246W	729	349	606	519	435	191	500	344
YOR288C	403	273	374	263	713	248	913	669
YDL240C-A	0	0	1	0	0	0	0	0
YCR028C	1252	542	746	656	884	312	855	560
YML054C	792	674	1114	481	3695	1237	2404	975
YLR179C	3453	1363	1901	2267	2245	1061	2056	1672
YOR141C	1727	730	1206	933	1263	472	1363	762
YPL280W	224.561	166.332	277.803	214.312	142.467	43.862	159.61	74.963
YBL106C	235	70	140	106	184	80	169	133
YGL044C	838	340	571	532	605	264	524	374
YER107C	1179	431	742	659	901	410	890	584
YBR038W	1264	834	1246	720	1148	482	1082	550
YER076W-A	3	1.041	2	0	3	1	1	3
YGR259C	10.045	2.006	5	7.039	3.018	1	5.009	3
YEL047C	1985	877	1380	1414	1531	728	1693	1162
YPR016C	4467	1728	2449	2741	2967	1167	2596	2124
YOR208W	1726	1263	1452	965	1519	520	1263	845
YDL055C	30137	13404	19489	22964	21292	9178	23887	21250
YML009C	675	342	513	450	618	195	574	425
YML072C	3409	1937	2620	1929	3571	1255	3248	1918
YDR142C	673	293	423	360	427	170	438	259
YFL044C	1340	621	1047	778	716	280	769	446
RDN37-2	20.188	0	7.825	8.033	0	0	32.568	0
YEL011W	382	234	437	146	562	180	407	122
YKL019W	1243	613	994	848	972	477	1129	890
YJL130C	9443	5205	6366	4890	6867	2511	5990	3886
YBL085W	2251	1031	1558	1399	1794	732	1718	1104
YBR116C	86.185	93.576	120.659	69.857	32.351	10.434	33.705	21.013
YDR166C	1131	670	878	525	838	220	788	500
YHR212W-A	3	0	0	0	7	2	0	0
YDR082W	936	486	698	524	700	196	767	490
YDR348C	2585	1142	1647	1729	2119	840	2001	1409
YKL182W	13438	5213	6887	7151	20447	7238	16121	10945
YDR445C	1.009	2.044	1.012	0	1.013	0	0	0
YKL018C-A	415	167	298	320	287	119	269	228
YPL027W	19	5	13	8	13	3	14	20
YKL135C	1749.97	983.9	1236.95	762.926	1498	438	1349.81	824.961
YLR363C	217	152	154	100	201	56	152	113
YEL077W-A	3.167	1.593	0	11.556	0	0	1.999	0
YDR179C	154	141	149	56	206	28	180	118
YML089C	38	11	17	17	71	40	117	56
YLR431C	949	536	640	596	619	213	608	449
YKR046C	5190	2923	4817	3515	3925	1715	3417	2515
YJR005W	1383	827	1121	719	1238	405	1285	657
YJL116C	16392	6915	8687	9720	4157	1457	3160	2785
YMR030W	307	161	282	206	451	111	400	201
YER030W	1218	536	1088	857	1104	341	1069	717
YIR026C	2432	938	1283	1617	1378	537	1159	1076
YJR072C	2691	1063	1761	1808	1670	693	1702	1249
YDR515W	784	370	573	483	728	213	653	415
YKR039W	780	360	410	390	485	174	311	280
YGL003C	1208	509	729	630	799	323	712	490
YPL009C	2017	956	1362	1397	1687	533	1250	1015.7
YDR268W	716	361	536	397	500	200	539	284
YGL192W	8	5	4	5	3	1	6	2
YDL117W	2034	1116	1256	1030	1576	551	1260	937
YMR131C	8839	3786	5147	5858	5509	2159	4897	3713
YMR293C	671	378	491	386	448	157	437	266
YJL214W	75	31	44	39	46	16	55	29
YIL105C	808	486	607.283	403.204	835	265	822	407
YML126C	4901	2312	3805	2763	4859	1757	3886	2527
YLR189C	1258	701	1075	677	975	334	961	524
YIL150C	604	242	404	327	382	150	415	269
YLR349W	24	18	26	26	41.092	20	104	99.278
YGL250W	192	108	180	121	146	56	177	121
YBR212W	2045	1093	1657	1288	1240	521	1347	825
YJR109C	1777	1001	1592	1029	1974	671	2013	1275
YLR254C	795	337	543	554	337	139	395	305
YGR085C	12867.8	4883.24	7944.81	8761.53	9972.19	4339.18	9397.64	7363.16
YPL105C	4674	2021	2845	2700	3329	1396	2891	2035
YGR145W	3530	1574	1999	1882	2571	835	1962	1477
YJR094C	124	94	108	71	187	36	176	86
YKL177W	43	18	42	25	24	24	33	27
YGL154C	285	143	203	168	198	89	257	126
tK(UUU)Q	0	0	0	0	0	0	0	0
YBR129C	482	220	311	266	444	130	427	261
tK(UUU)D	38	13	20	18	17	4	10	10
YMR322C	47.289	36.735	67.544	40.904	2.214	0	6.072	10.899
YKL099C	1418	566	912	957	901	367	883	627
YDR315C	154	133	134	111	184	46	183	95
YLR394W	713	367	510	388	944	333	903	471
YNL104C	5614.65	2605	4099	3689	5744.36	2617	5262.04	3899
YNL151C	1134	459	726	755	896	355	837	619
YNR066C	592	410	506	248	352	128	342	200
YLR220W	1346	652	1134	846	1280	465	1199	730
YHR006W	2430	1322	1937	1443	1911	819	1909	1130
YMR232W	114	92	100	70	103	21	108	37
YNL083W	918	433	641	561	650	258	595	370
YGR038C-A	0	0	0	0	0	0	198.026	0.009
YGR038C-B	7214.25	3416.42	4933.72	2941.28	4774.97	1951.31	4827.47	2450.33
YMR238W	4535	2321	3244	2876	2758	1138	2506	2157
YER168C	1260	569	797	672	909	369	887	618
YPL265W	1152	659	1026	635	853	248	991	691
YOR227W	1722	1184	1434	837	1557	477	1308	623
YOR081C	1348	614	1000	763	932	374	975	528
YEL026W	7811	3274	4643	5322	4382	1653	4208	3709
YGR050C	26	4	12	18	21	4	34	9
YDR021W	803	431	505	479	714	191	509	350
YGL063W	272	111	164	159	184	104	220	152
YPL212C	4298	2077	2479	2630	2627	1008	2387	1763
YOL157C	271.757	135.176	205.016	185.053	144.966	79.636	185.985	166.416
YOR345C	1.01	1	1	1	0	0	1	0
YPR095C	1155	612	780	552	1115	313	885	483
YOR310C	10568	4911.97	6107.26	6735.61	7520.98	2752.65	6610.99	5242.46
YDR188W	6286	2665.99	3722	4158	4786	2130	4668	3464
YOL128C	661	315	455	355	457	153	351	277
YGL236C	1528	629	910	1058.93	1213	554.987	1116	785
YHR133C	1002	444	588	620	775	298	725	526
YDR017C	2675	1287	1504	1446	2113	721	1866	1288
YIL090W	1853	948	1226	1095	1498	460	1302	885
YBR183W	397	234	405	196	349	102	255	125
YOL048C	194	121	225	111	302	79	216	208
YML039W	0	0	0	0	19.262	0	19.102	19.747
YCR007C	256	142	224	169	179	53	202	136
YDR540C	80	69	133	84	113	41	262	186
YEL004W	288	167	218	151	233	50	226	141
YPR057W	703	311	483	426	523	211	522	309
YLL032C	535	359	433	321	409	104	382	238
YDR116C	1642	803	1107	884	1217	491	1088	631
YPL119C-A	11	32	16	6	39	4	20	9
YDR299W	3170	1525	2022	1761	2898	907	2324	1513
YLR030W	238	130	194	142	124	53	127	71
YDR122W	1724	911	1304	776	1359	541	1219	607
YOL062C	2299	1092	1625	1356	1657	629	1506	972
YNL234W	936	434	464	507	510	175	431	358
YLR467W	5137.98	2046.29	3283.87	2805.65	3424.12	1468.04	3649.36	1781.93
YJL194W	1109	444.979	606	348	875	342	622.995	276
YOL015W	129	64	110	76	150	52	159	115
YDL070W	4634	3024	3539	2726	3820	1103	3716	2335
YOR241W	1389	653	917	806	996	409	997	656
YLR056W	14987	5435	10652	9650	7608	3051	8328	5478
YPR039W	2	0	0	0	1.385	0	0	0
YMR054W	1894	1024	1421	1100	1801	667	1722	1167
YKL110C	1940	876	1266	1364	1297	526	1348	991
YML100W-A	3	1	2	4	4	0	1	3
YPR070W	918	559	640	521	827	237	695	410
YLR204W	1061	524	809	874	733	293	714	529
YML097C	1438	688	846	870	1222	435	1076	784
YKR007W	452	204	391	373	326	136	446	270
YDL096C	0	1.014	0	4	1	4.141	1	0
YHR193C	7567	3100	5117	5496	6485	2686	6143	4612
YBL099W	5889	3172	4598	3599	17881	7437.96	16497	9200
YJR035W	921	478	725	462	673	219	649	359
YOR126C	705	397	545	491	516	230	577	370
YMR023C	692	312	505	375	498	198	476	281
YOR119C	2842	1372	1977	1617	1892	579	1762	1275
YNL196C	9	7	11	7	9	3	9	7
YNL187W	937	394	547	671	446	186	455	402
YMR141C	25	17	14	13	42	14	25	13
YLL014W	684	311	543	362	662	157	574	425
YBL062W	2.014	1.03	0	1.009	0	0	0	0
YCR061W	385	221	360	227	283	128	305	167
YOR199W	0	0	0	3	2	0	1	2
YPR115W	1479	749	1062	747	1326	488	1116	587
YHR088W	2443	1145	1505	1695	1791	601	1578	1196
YBR017C	2099	1035	1580	1200	1413	477	1492	893
YPR162C	634	304	514	330	422	136	483	287
YGR166W	1461	950	1165	808	1096	346	833	671
YDL161W	1527	707	1158	951	1190	457	1126	639
YKL050C	486	278	355	221	363	126	281	181
YJR055W	306	147	194	187	205	76	232	170
YGL099W	2738	1212	1515	1478	1900	719	1683	1153
YFL030W	846	428	613	546	1850	765	1656	1003
YIL119C	278	204	237	143	207	42	163	72
YPL193W	1525	689	1074	908	1092	317	926	727
YNL005C	2136	1029	1545	1286	1823	633	1695	1147
YGL217C	2	1	0	0	0	1	0	1
YJL144W	117	85	151	106	53	34	50	59
YBR012W-B	54.011	0	10.447	0	11.032	7.892	110.332	75.883
YLR379W	4	3	2	2.008	0	1.006	1.002	2.01
YJR139C	3686	1857	2646	2067	3612	1111	2989	2259
YBR133C	1181	523	828	658	922	358	954	646
YBR162C	8080	3662	5532	5605	7281	3006	6310	4939
YNL331C	521.006	242.754	429.688	375.935	324.114	142.127	353.146	254.076
YJL079C	8739	3777	5826	5848	4437	2173	4942	3552
YGL019W	1578	730	1135	998	1093	555	1087	809
YGR201C	642	336	603	552	268	101	308	207
YNL172W	947	537	747	479	904.938	253	860	562
YNL058C	1522	920	1521.96	1121.88	932.933	386.976	1035	747
YPL160W	6297	3029	3890	3482	5347	1817	4528	3107
YOL083C-A	1.121	0	0	1	0	0	1	0
YNL023C	2299	950	1397	1329	1206	528	1382	933
YDR214W	3420	2073	3874	2275	2034	823	1975	1329
YLR222C	4397	2071	2664	2313	3207	1029	2676	1887
YLR295C	1722	816	1260	1145	3711	1591	3779	2301
YER175W-A	1	8	0	3	10	5	6	0
YHR168W	669	331	448	351	474	215	450	266
YOR064C	421	206	377	275	598	189	601	354
YOR159C	504	204	350	305	326	130	348	226
YOL081W	1685	1070	1101	751	1403	370	1059	688
YOL036W	3407.99	1675	2267.98	1899	2513	1000.96	2206	1397
YGL148W	4331	1603	2691	3004	3784	1752	3854	3064
YOR031W	373	241	381	314	158	69	180	125
YBR282W	1071	447	733	606	615	238	581	387
YDR194C	4325	2072	2697	2207	3524	1040	3015	1926
YOL114C	33	22	54	44	37	20	43	28
YGR084C	1603	722	1111	1035	1199	472	1157	710
YNR030W	835	527	809	568	1185	374	1116	791
YAL037C-A	4	3	2	2	8	1	10	4
YML007C-A	10	5	9	9	7	3	7	2
YBR018C	63638	35990	56966	37045	36278	14572	52761	27630
YKL076C	170.155	71.36	120.048	124.38	112.103	47.174	128.848	74.628
YDR466W	2011	920.979	1263	1009.98	1441	502	1207	733
YFR045W	454	257	334	261	378	129	357	190
YIL002C	1104	610	828	623	1018	332	875	522
YGR159C	46187.9	18786	23972	30096	22126	9367.79	20257	18296
YLR369W	1160	600	881	605	935	330	894	475
YFR032C	164	76	81	33	385	94	151	35
YNL118C	2232	1137	1672	1177	1913	652	1743	1093
YGL228W	2017	1025	1543	1116	1857	686	1731	1018
YJR117W	1806	1051	1552	942	1772	589	1753	1151
YBR196C-A	11	6	6	9	7	2	3	3
YBR196C-B	20	7	4	6	13	8	7	6
YIL030W-A	76.33	29.083	47.315	37.297	54.419	22.351	50.141	32.055
YLR357W	1861	902	1233	991	1566	591.986	1487	882
YER127W	2776	1287	1690	1790	1865	761	1678	1232
YBL015W	833	455	682	483	3098	1494	3144	1422
YLR017W	2941	1177	1667	1986	1588	695	1597	1282
YHR110W	1340	578	974	835	1024	417	1071	628
YBR041W	1304	728	987	652	1099	359	940	640
YOR394W	15	14.305	12.784	10	20.702	3.209	9.877	7
YCL068C	0	0	0	0	0	0	0	0
YDL220C	513.795	262.601	390.861	360	433	178	435	252.88
YDL039C	9943	3984	3414	5051	6556	2876	2748	3204
YKL202W	27	9	15	22.119	29	5	17	24
YGR122C-A	5.736	8.116	9.331	5.656	6.989	4.241	4.353	6.886
YOR264W	1788	703.992	987	1307	1180	462	1213	1173.99
YNL042W-B	6.21	2	8	6.501	6.484	1.038	3.308	9.894
YBL029C-A	507	232	368	357	280	144	411	324
YOR008W-B	39	19	17	22	33	13	19	21
YOR366W	20	7	10	12	17	7	14	11
YNL275W	656	376	415	298	631	193	552	307
YAR015W	1474	647	913	1484	1580	611	745	984
YOR384W	3	4	5	2	7	4	7	9
YLL051C	1417	767	1085	839	991	363	1134	610
YDR427W	1244	921	961	707	1326	287	1131	678
YLR079W	1646	744	1243	1193	1042	491	1198	873
YLR408C	129	80	130	91	120	39	116	83
YMR093W	3354	1502	1983	1867	2573	965	2122	1361
YBR221W-A	1	0	0	0	0	1	0	0
YDR079W	481	228	343	279	372	94	358	269
YMR268C	524	282	364	249	464	130	383	238
YOR169C	0	0	1	2.006	0	0	0	0
YML070W	2249	1230	1945	1362	1767	702	1923	1097
YHR175W-A	15	18	25	16	32	11	35	25
YPR072W	1681	807	1049	872	1277	440	1171	719
YMR108W	11517	5046	7399	8284	8758	3789	8715	6435
YCR091W	433	214	363	281	265	123	294	164
YER062C	17236	7112	9527	13984	5493	2287	4839	4665
YDR244W	1231	584	820	654	922	330	866	534
YER189W	268.143	175.01	186.073	128.379	193.52	37.599	204.611	96.995
YJL009W	0	1.007	0	0	2.01	0	1	0
YDL137W	5188.51	2454	4012.26	3615.12	4270.56	1788.02	5087.28	3704
YGR271W	1177	576	697	552	1091	337	970	569
YDR233C	11659	5073	7002	8162	8372	3245	8088	7054
YGR071C	650	451	405	257	653	128	495	252
YCR106W	110	69	84	74	167	52	236	143
YBL100C	1	1	0	0	3.005	3.039	5.026	1.001
YER109C	1045	476	707	581	799	325	786	537
YDR489W	941	430	505	529	578	227	502	354
YPR049C	1037	627	865	546	841	256	840	438
YDL057W	419	253	410	246	254	102	271	187
YPR014C	0	0	0	1	0	2	1	0
YGR257C	1235	546	913	806	987	375	952	615
YEL045C	49	8	22	20	15	12	13	10
YPL235W	2491	1120	1555	1362	2043	727	1685	1178
YLR122C	55.743	25.908	43.369	18.137	33.791	4.272	30.206	25.419
YLR155C	0	0	0	0	0	0	0	2
YBL087C	7165.82	2708.08	4287.81	4862.17	5369.56	2349.58	5109.71	4074.7
YJL132W	553	361	522	289	465	164	415	215
YGL190C	1411	947	1019	679	1417	364	1009	548
YBR110W	984	554	805	519	1054	293	966	602
YDR144C	864	368	661	473	1127	404	1245	723
YFL046W	613	269	462	404	468	198	501	339
YOR103C	440	356.967	323	256	635.958	111	581.994	303.988
YKL137W	819	385	713	520	657	223	635	429
YDR447C	9900.88	3616.59	6278.5	6413.56	8639.21	2927.91	8285.02	6071.31
YGL009C	2703	1269	2790	1507	3648	1524	3521	2464
YNL324W	0	0	1	0	1	0	0	0
YPR145W	4313.39	1740.35	3199.34	2939.63	6180.37	2560.25	6780.66	4020.94
YJL063C	1472	686	1107	953	1100	506	1217	716
YMR149W	1524	717	1138	983	1547	608	1600	1226
YPL021W	0	0	1	0	1	1	1	0
YIR010W	1138	522	837	666	796	326	703	460
YDR331W	1085	465	704	542	992	335	820	595
YJL114W	5.572	6.594	10.272	9.854	10.114	1.063	21.199	0
YKR044W	1276	527	838	877	812	423	944	709
YLR433C	827	345	558	443	509	197	563	380
YMR068W	369	173	340	236	261	118	272	162
YLR157C-B	48.864	0	49.496	20.062	46.789	0	18.791	20.981
YNL164C	876	372	588	525	645	235	660	393
YER032W	930	480	836	614	888	319	884	477
YJR070C	5851	2253	3408	4593	3725	1737	4073	3585
YGL005C	1488	834	1130	746	840	219	953	605
YHR043C	1911.83	1057.77	1711.51	1508.62	2053.31	904.982	2438.41	1798.45
YDL111C	2373	1130	1434	1500	1672	573	1512	1088
YMR133W	14	8	22	8	8	4	5	4
YPL007C	479	274	343	238	484	123	504	240
YKL159C	268	158	212	176	237	76	216	141
YDR507C	3220	1354	1929	1594	2817	968	2334	1312
YKR075W-A	10.157	0	0	0	1.007	0	1.012	1.007
YLR138W	3405	1600	2306	1862	2436	871	2322	1515
YBR101C	1395	711	1048	867	1089	326	1028	716
YLR396C	680	352	530	355	565	156	494	321
YBR245C	1775	917	1222	966	1626	539	1490	949
YJL216C	236	101	112	111	171	62	182	134
YBR210W	294	126	229	166	316	77	270	175
YPL103C	772	340	586	465	507	228	639	332
YIL103W	1334	509	807	716	876	286	719	544
YIL152W	439	176	299	279	249	103	235	183
YML045W-A	0	0	0	0	0	0	0	0
YJR096W	881	551	905	652	646	243	682	404
YAL010C	430	222	333	255	365	146	367	226
YGR143W	3053	1509	1915	1579	1900	577	1459	902
YGR112W	812	406	582	538	577	225	591	364
YLR256W	2861	1979	1898	1601	2974	632	2438	1385
YHR174W	80393	34937	58449.2	62825.3	58231.6	27485.8	58023.5	49607.9
YOR012W	172.706	88.495	108.207	111.246	53.9	37.073	74.296	63.75
YIR001C	762	359	568	518	728	267	720	472
YDL213C	2389	994	1532	1821	1483	668	1523	1237
YDR442W	1	1	1	1	1	1	1	1
YDR317W	145	90	122	94	146	34	97	90
YDR478W	284	141	216	196	189	79	210	151
YKL097C	5	3	1	1	4	1	3	0
YOL164W-A	1	0	1	0	0	0	0	0
YNL106C	965	466	701	561	730	298	730	492
YOR378W	32	22	13	13	29	8	10	15
YFR015C	448	352	441	250	416	184	472	285
YMR230W	8562.08	3095.74	5300.99	5420.56	6757.52	2388.34	6748.54	5031.15
YIL092W	702	277	423	414	350	129	448	299
YAR009C	20351.8	10159.8	12225.3	8619.12	19090.1	5916.13	16659.4	8846.18
YLR321C	1137	535	777.989	646.834	812	322	786.988	500
YBR004C	893	681	720	542	1006	209	692	516
YGR052W	186	117	198	90	60	21	57	37
YJR161C	1020.92	530.95	842.339	510.778	651.511	227.153	892.376	602.324
YOR278W	350	208	274	226	290	113	280	183
YNL085W	2176	1240	1531	1087	2279	580	1820	1025
YGL061C	295	146	219	158	273	77	272	140
YPL210C	2669	1368	1694	1409	2415	738	2055	1381
tS(AGA)G	6	3	7	3	5	1	8	1
YOR087W	656	385	553	318	773	210	697	370
YGL234W	4988	2207	3026	4208	5448	2150	3406	3473
YOR347C	1022	489	778	681	487	215	595	404
YPR093C	455	213	357	341	201	97	283	192
YAL029C	4198	2035	2333	2067	2980	945	2206	1520
YOL155C	1245.67	894.821	1590.81	723.974	373.768	175.234	333.025	100.181
YDR421W	771	388	629	457	660	244	637	336
YGR186W	2448	1180	1740	1297	1914	672	1693	937
YDR294C	1696	842	1370	1053	1298	466	1266	763
YHR135C	2691	1148	1885	1711	1943	866	2057	1346
YDR015C	0	0	0	0	0	0	0	0
YBR181C	17530.3	6633.64	10116.8	12224.9	14644.7	6067.68	13474.6	10132.2
YOR078W	2368	1034	1472	1511	1808	539	1602	1307
YOR243C	3439	1497	2021	1862	2365	776	2229	1531
YMR165C	1261	614	854	693	991	404	936	612
YCR005C	1316	914	1274	653	945	441	1201	583
YLR163W-A	0	0	0	0	0	0	0	0
YPR055W	602	447	500	299	607	127	561	264
YIL016W	420	163	286	263	376	133	341	279
YLR032W	1388	649	972	718	1107	344	960	485
YDR114C	3	0	0	3	1	0	0	0
YLL030C	0	0	0	0	0	0	0	0
YDL185C-A	1	1	0	0	2	0	0	1
YLL065W	1.149	0	2.71	2.667	0	0	0	0
YPR046W	159	67	148	87	140	61	196	118
YBR099C	8	9	3	5.17	13	0	12.244	7
YBL027W	17373.2	6499.48	10217.4	11704.1	13631.4	5743.93	13025.5	9876.82
YOL060C	1966	1082	1662	1230	1648	753	1563	938
YIR018C-A	0	1	0	0	1	0	0	1
YOR382W	358	185	315	249	181	105	245	173
YNL232W	2053	873	1193	1307	1228	556	1080	895
YDL076C	769	407	570	472	570	184	430	363
YOR225W	0	0	0	0	2	0	0	1
YDR120C	3383	1403	1900	2054	2404	899	2057	1697
YLR465C	39.245	19	15.16	22.535	27	10	44	25
YJL192C	1209	592	903	634	1156	353	978	704
YEL020C-B	5.012	1	0	0	2.007	0	4	4.02
YLR054C	132	76	121	107	85	42	86	58
YLR009W	5355	2253	3129	3406	3491	1338	2964	2362
YKL116C	993	484	678	489	841	283	759	481
YBR209W	1	0	1	1	3	1	3	2
YOR292C	189	152	198	122	174	71	226	128
YLR423C	344	219	289	226	357	127	518	501
YDR278C	0	0	0	0	0	0	0	1
YLR105C	921	446	758	636	640	246	693	421
YML091C	1620	974	1285	853	7803	1819	7289	3446
YHR191C	229	114	169	146	199	89	179	124
YDL098C	276	120	243	177	272	81	214	145
YLR202C	95.985	55.94	76.913	52.353	70.522	26.919	59.709	47.525
YLR299C-A	0	0	0	0	0	0	0	0
YKR005C	418	199	304	223	313	103	343	221
YMR143W	10767.3	3966	6521.1	6929.15	8821.45	3164.84	8304.5	6326.47
YCR063W	226	89	144	133	137	54	143	85
YNL189W	5618	2535	3469	3176	4076	1346	3365	2416
YFR024C-A	1933	927	1488	1172	1321	590	1459	792
YCL047C	311	207	303	214	356	148	409	238
YGL122C	3876	1649	2174	2403	2470	1134	2384	1702
YDL018C	369	165	308	220	395	139	396	186
YOR120W	7283.95	4120.93	7107.99	4640.98	5883.88	2565.99	6498.99	3410.98
YPR160W	3216	3240	4117	1602.92	3519	1260	2996	1167
YBL060W	1194	581	849	624	927	285	912	556
YDR065W	402	236	307	211	298	96	295	222
YBR019C	129779	71313	107784	73558	63574	29193	100864	49685
YKL056C	21364	7799	13665	14059	14828	5737	15220	11976
YKL065W-A	170	101	195	138	54	5	53	40
YGR160W	94.097	5.013	9.013	23.044	13.016	37.214	15.024	6.009
YDL163W	2	0	0	0	0	0	1	0
YPL068C	724	333	458	375	499	186	465	329
YJR057W	645	315	486	402	462	173	503	336
YGL211W	1637	713	1161	1162	1076	470	1166	767
YFL032W	10	4	8	8	13	7	23	18
YPL195W	1323	832	1075	648	1355	344	1209	615
YCL044C	875	454	739	641	1007	450	1205	739
YAL059W	1491.99	536.994	871.996	998.998	851	332.996	778	674
YNL007C	1456	878	1490	801	871	321	863	493
YPL148C	446	228	375	268	276	103	352	192
YJR137C	1478	713	1003	798	1894	513	1246	596
YMR021C	602	267	527	309	475	147	458	232
YMR074C	943	491	805	580	832	265	810	591
YGR203W	303	161	216	215	213	115	279	196
YJR039W	440	241	340	210	366	98	354	152
YDL158C	32	25	32	25	43	9	32	19
YOR104W	863.865	409.7	582.825	521.397	572.513	192.13	539.754	448.238
YFL009W	1430.96	748.972	1125.15	851.498	1226.85	475.677	1158.12	725.916
YLR297W	703	325	556	496	294	83	406	205
YLR279W	1	0	1	1	2	0	0	2
YDR216W	2510	1801	2228	1243	3505	1051	3328	1740
YIL120W	461	227	384	308	333	100	362	267
YBR030W	936	470	668	601	1034	405	1011	632
YPL162C	485	249	355	331	502	189	625	470
YGR095C	1575	633	1026	1070	895	342	793	681
YCL027W	169	56	114	72	221	70	217	169
snR3	0	1	1	1	0	1	2	1
snR5	44	31	38	29	37	14	36	31
snR4	182	84	177	116	103	24	153	75
snR6	0	0	0	2	0	0	0	1
snR9	62	28	58	45	49	9	47	44
snR8	23	6	16	18	14	10	15	16
YHR029C	297	147	250	198	226	77	231	144
YIR021W-A	4	2	0	1	2	0	4	3
YAL033W	407	147	303	271	295	117	359	250
YNL130C	664	425	718	450	1516	456	1388	789
YNR036C	1735	835	1373	1135	1304	565	1345	835
YNR049C	697	276	462	449	472	194	519	310
YDR192C	555	255	469.971	421	342	169	507	282
YOL112W	1800	857	1445	1102	1631	654	1637	1063
YML109W	1338	614	931	721	1231	443	1208	611
YOL083W	766.879	514	775	483	388	154	541	264
YNL251C	2819	1162	1325	1436	2241	898	1697	1262
YBR266C	1.001	0	1.011	2.003	0	2.023	0	0
YBL004W	2561	1137	1200	1248	2114	566	1620	1321
YER145C-A	21.011	5	14	12.015	16	6	14	7.005
YBR164C	787	371	573	474	760	242	693	420
YHR074W	1859	974	1427	946	1424	516	1430	832
YDR464W	3036	1416	1896	1780	2058	815	1800	1247
YFR030W	1918	904	1373	969	1422	498	1415	702
YJL146W	584	288	481	300	572	208	515	301
YKL078W	2208	924	1172	1146	1322	547	1201	896
YIL055C	606	326	469	368	350	126	327	234
YPL053C	1994	973	1567	1121	1956	627	1802	1179
YLR351C	1521	691	1081	1010	1145	504	1280	878
YEL009C-A	9	11	11	7	13	1	14	6
YJR111C	1031	457	630	595	712	274	584	383
YIL030C	2785	1392	1641	1387	2425	664	2030	1273
YER125W	3152	1608	2118	1580	2553	932	2236	1316
YER152C	1324	615	920.995	885.988	917	467	1004.99	903.965
YLR015W	929	410	633	546	598	247	543	369
YHR116W	529	241	399	404	307	136	323	212
YPL259C	898	474	696	498	882	283	813	478
YOL100W	1521	771.992	1163	862	1139.97	380.983	1272.98	703
YOR039W	1305	664	1007	765	1133	391	1086	669
YDL037C	3807	1603	1340	1645	2738	820	1033	1301
YLR334C	4	5	6	1	8.003	0	9.003	0
YHL043W	3	3	2	0	0	0	1	1
YOR364W	7	3	5	3	5	2	4	3
YOR386W	303	197	315	155	269	73	262	116
YAR042W	4131	1757	2544	2771	2087	957	2432	1802
YPR198W	1036	563	749	556	804	207	589	438.98
YHL038C	557	301	389	294	578	203	534	313
YLL053C	335.616	177	249	109.578	543	301.204	660.741	225.615
YDR425W	418	318	394	197	407	124	408	213
YOR331C	12.009	0	2.006	0	2.002	7.052	4.011	3.004
YML076C	772	464	616	489	661	234	759	397
YKR060W	677	301	438	408	389	167	473	302
YHR094C	38.999	10.185	22.474	19.605	19.419	9.218	10.243	13.366
YER069W	5318	2484	3342	3581	4532	1665	3827	2374
YMR091C	1295	589	798	688	978	363	858	575
YER012W	1929	872	1360	1194	1524	535	1476	1153
YHR098C	2724	1468	1880	1484	2684	915	2854	1750
YDL135C	1150	499	807	678	968	313	928	537
YCR093W	2308	1454	1622	1098	2680	675	2076	1091
tP(UGG)O3	1	0	0	0	0	0	0	0
YGR273C	4	13	7	8	7	4	11	10
YGL080W	692	321	500	404	738	200	738	486
YBR069C	14742	6453	8171	7690	9738	3552	7889	5991
YGR077C	1483	791	968	816	1120	333	895	616
YCR104W	0	0	0	2	2.298	0	1.123	4
YDR040C	2541.17	1116.44	1797.88	1558.05	1284.42	664.709	1475.67	1071.69
YPR012W	13	4	6	5	17	5	11	8
YGR255C	2046	1031	1293	1355	1560	576	1425	1243
tM(CAU)M	0	0	0	1	1	0	0	0
YDL051W	4056.96	1636.99	2494.98	2733	2949.97	1190.96	3154.99	2464
YBL102W	542	230	401	335	582	194	458	306
tM(CAU)P	16	4	6	7	4	3	7	6
YPL237W	6103.99	2447	3488	4191.98	4131	1434	3647	2962
YLR120C	2922	1415	2062	1622	2784	1154	2379	1685
YCL001W-B	15	12	22	19	11	2	20	6
YCL001W-A	12	5	18	7	8	2	13	5
YNL068C	1837	843	1188	1245	1435	536	1216	896
YJL169W	10	4	3	3	1.007	2	2	2
YBL002W	2463	1128	1895	1892	2702	940	2262.27	1473
YDR146C	1106	578	974	709	930	389	927	537
YBR112C	3498.38	1690.09	2285.08	1918.33	2760.87	1128.14	2477.63	1431.96
YBL081W	2127.34	906.344	1313	1303.06	1366.94	644.272	1253.37	892.646
YFL040W	7	3	7	3	13	2	2	5
YNL326C	814	340	577	410	559	192	583	352
YDR337W	1224	554	873	809	959	332	890	608
YJL061W	1258	648	853	577	1127	280	978	646
YPR147C	723	338	519	404	651	207	575	425
YKL131W	11	8	7	7	1	3	3	1
YDR441C	2169	859	1240	1447	1160	483	1099	868
YPL094C	3372	1533	2236	2484	2919	1318	3120	2597
YOR101W	3665	1554	1914	2227	1998	753	1652	1588
YER020W	1178	562	934	810	900	371	984	637
YDR231C	515	239	400	300	574	237	695.953	387.995
YJL112W	1263	536	951	716	1404	490	1153	708
YFL066C	616.506	328.804	335.647	335.383	337.501	146.953	383.852	156.402
YNL193W	449	255	369	245	416	154	350	225
YML058W	2108	935	1627	1440	1635	840	1766	1231
YBR188C	373	192	276	299	303	133	333	250
YLR435W	1130	447	636	717	767	276	719	539
YJR076C	1852	919	1506	1251	1790	782	1739	1244
YKL157W	3479	1979	2829	1894	3323	1212	3132	1609
YBR003W	1036	592	806	639	1004	437	1078	781
YPR129W	1623	845.982	1229.95	1038	1450	570.987	1464.96	983
YDL113C	884	491	707	432	677	218	643	309
YMR135C	1040	557	814	634	966	318	687	562
YGL007W	10	0	3	5	5	7	8	5
YPL005W	498	271	368	230	443	115	348	203
YBR247C	3543	1505	2093	2229	2514	907	2122	1566
YLR185W	6872.47	2661.05	4393.13	4914.9	5467.88	2363.86	5350.83	4263.3
YJL210W	740.98	378	498	392.95	420	185	392	247
YLR398C	1915	954	1218	980	1690	577	1524	945
YIL154C	1057	497	762	668	558	279	556	400
YIL101C	1071	586	860	571	604	257	545	320
tT(CGU)K	0	1	0	0	0	0	0	0
YKL004W	2818	1413	1742	1668	1901	618	1763	1324
YPL154C	7755	4192	7067	5645	5135	2168	4779	3350
YPL101W	1353	617	910	717	1027	448	1015	676
YLR258W	1215	818	1281	668	917	372	1090	515
YBR178W	0	1	3	1	3	0	2	2
YJR098C	279	144	225	155	202	77	216	127
YHR176W	469	201	313	271	305	111	329	179
YJR018W	15	4.014	6.041	2.014	11.052	4	13.092	5.034
YMR326C	1	0	0	2	0	0	1.331	1
YDL244W	174.99	105.531	138.792	158.566	92.141	61.8	133.017	97.907
YDR319C	251	215	267	157	208	47	198	127
YKL095W	705	333	479	383	358	151	407	294
YOL099C	0	1.008	1	1	3.025	1.017	1.021	6
YIL094C	3528	1443	2652	3104	1907	981	3217	2793
YLR451W	1639	769	1130	957	1189	419	1140	782
YFR017C	421	275	532	290	444	177	494	222
YLR342W-A	8	5	3	1	5	0	3	6
YIL076W	2788	1334	2054	1673	2339	826	2453	1782
YNR077C	4.851	1	2.29	2.333	0	2	0	4
YOL044W	458	292	374	244	460	102	408	211
YLR323C	510	249	409	338	340	142	370	274
YOR085W	1555	710	1197	1109	1344	558	1338	1075
YGR054W	7587	3655	4382	4289	5040	2006	4502	3029
YOR050C	4	2	1	0	7	2	2	2
YNL087W	2328	1122	1464	1199	2326	682	1882	1405
YGR114C	0	0	0	0	0	0	0	0
YLR318W	485	329	398	295	462	110	459	251
YBR278W	461	204	407.993	323	282.981	130	344	216
YNL024C-A	639	316	495	373	519	125	503	371
YDR296W	1818	750	1278	1129	1193	521	1098	775
YGL232W	703	353	520	358	740	159	588	351
YPR091C	1150	691	969	553	1187	364	1039	597
YGR141W	726	399	667	420	510	177	526	325
YAR030C	11	5	11	5	8	0	12	2
YGL111W	2505	1014	1597	1494	1761	647	1610	1239
YJR158W	0	0	0	0	0	0	0	0
YHR137W	2050	1096	1631	1212	1079	370	1175	745
YFL011W	41	37	57	39	36	16	42	40
YMR198W	483	208	340	253	304	108	319	170
YCR003W	977	430	737	561	732	247	660	382
YMR316C-B	108	54	89.991	71	79	31	92	46
YMR316C-A	0	2	7.117	4.08	4	0	3	2.039
YDR342C	16890.1	7030.43	10014.3	8619.42	9319.69	3739.38	13746.5	7409.4
YMR163C	413	239	279	234	401	125	364	219
YGR294W	16.665	5.979	4.752	8.157	20.955	5.995	12.753	9.158
YEL008W	10	5	4	5	7	0	4	2
YLL067C	502.879	346.868	344.943	62.856	162.88	114.41	199.765	30.261
YHR086W-A	0	0	0	0	0	1	0	0
YBR020W	138501	74372	108610	83343	79020	35663	111515	65289
YLR418C	994	486	671	590	756	289	799	493
YDR112W	0	0	1	0	0	0	0	0
YER059W	814	423	629	515	569	239	645	368
YNL076W	1727	819	1194	955	1248	440	1252	764
YBL025W	289	137	218	180	218	88	217	116
YOL066C	1262	599	823	777	828	373	824	516
YDR126W	376	156	258	237	221	82	235	160
YPL216W	758	370	479	407	486	170	512	331
YOR223W	229	127	224	142	176	68	214	127
YEL022W	1377	694	861	625	1510	333	1112	649
YHR072W	2989	1360	2215	1902	2289	980.925	2209	1568
YOL019W	2776	1378	1814	1594	2413	909	2239	1669
YLR463C	109.801	36.287	64.708	67.594	77.101	30.756	86.381	67.163
YJL190C	9477	3286	5221	6351	7606	2935	7251	5907
YMR218C	855	520	612	418	858	258	806	478
YNL265C	819	455	632	479	616.96	206	643	407.992
YNL230C	531	301	364	321	398	127	377	239
YLL049W	545	303	366	293	368	113	355	217
YHR211W	1036.46	493.75	769.406	546.773	747.676	305.082	803.783	476.872
YPR166C	699	295	433	380	696	173	631	398
YJL042W	1768	1101	1385	871	1574	679	1630	819
YNL301C	2891.47	1231.84	1888.53	1747.51	1991.23	774.396	1657.64	1218.27
YDR333C	1559	821	1025	831	1375	409	1213	748
YMR058W	505	286	330	287	692	329	765	349
YDR061W	1092	519	832	667	820	301	782	452
YJR112W-A	478	240	368	325	355	138	360	248
YOR290C	2325	1324	1760	1219	2219	755	2041	1106
YKL114C	1277	606	910	835	1030	350	955	700
YML024W	12525.1	4684.41	7614.5	8558.44	11363.8	4301.09	9984.98	7742.69
YML093W	5163	2189	2980	3241	3406	1280	3095	2243
YHR197W	2333	1335	1463	1220	1909	509	1521	1142
YDR276C	2525	1316	2226	1814	2162	753	2188	1491
YLR200W	767	356	566	494	593	195	639	486
YKR003W	699	384	607	342	626	233	641	341
YLR107W	3243	1569	1780	1671	1633	483	1208	996
YMR321C	20.948	0	27.211	0	0	0	0	0
YER175C	420	260	404	262	274	89	309	173
YIR012W	5445	2193	3085	3576	3323	1390	2894	2429
YDL183C	488	271	316	264	364	118	318	193
YPL278C	691.734	349.961	479.77	413.574	277.531	139.823	338.568	208.558
YMR105W-A	1	0	8	4	0	0	2	1
YMR118C	242	246	394	245	73	40	130	110
YCL049C	1531	865	1413	1064	1148	482	1221	832
YBL066C	1204	579	889	586	1844	694	1919	944
YGL120C	9105	3761	4809	6130	5291	2108	4615	4346
YGR271C-A	1297	578	824	693	963	223	851	577
YDR169C	1609	796	1117	990	1255	555	1401	956
YOR057W	1003	546	792	551	860	243	907	537
YLR410W-A	1606.46	732.886	1173.48	87.491	1488.16	166.504	1486.16	1208.7
YLR169W	3	1.005	0	1	1	2.022	0	2
YMR272C	4123	1695	3011	2543	1981	936	2296	1274
YPR108W	2262	1138	1646	1229	1846	655	1654	1001
YKL054C	7535	3396	5053	4847	5629	2139	5095	3518
YGR162W	11453	4952	6366	6460	7933	3180	6890	4674
YDL165W	677	252	526	443	420	222	498	336
YDR520C	697	400	478	407	451	133	513	339
YKL023W	504	282	445	368	351	174	417	269
YJR051W	1317	663	1058	845	870	342	1125	742
YNL009W	462	196	328	224	324	117	282	198
YFL034W	997	473	677	465	854	302	704	393
YKL164C	7009.94	4674.78	6283.15	5540.79	6822.78	3247.25	6090.89	4614.15
YJR135C	259	136	203	192	202	63	252	134
YGL213C	870	422	617.985	459	822.977	252.992	725	456
YOR161W-A	0	0	0	0	0	0	0	0
YMR076C	1117	620	798	517	1211	330	996	397
YOR161W-B	5.258	3	1	0	0	1	0	1
YJR037W	0	0	0	0	0	1	0	0
YNL027W	1149	620	846	596	940	279	872	470
YLR291C	1293	625	886	736	1112	429	1013	696
YDR210W	364	185	324	285	317	140	396.999	342
YIL122W	1324	691	910	768	773	290	754	420
YDL230W	523	243	426	336	365	124	369	218
YJR113C	1724	873.937	1317.98	1155	1407.97	671.914	1425	940.97
YGL075C	425	198	263	248	340	122	307	192
YHR041C	362	154	262	264	372	157	339	255
YIL156W-B	665	296	556	536	466	220	579	416
YIL156W-A	4	1.002	1.001	1.003	4.007	2	7	0
YLR416C	5.292	2	2	0	2	0	4	0
YGR097W	5699	2993	3669	3307	3374	1287	3203	2276
YIL068C	968	516	671	485	902	279	894	523
YCL025C	10071.6	3760	5054.98	5344.61	6730	2742.08	5310.5	4074.55
YNR034W	314	140	300	215	193	79	324	180
YOL085C	6	2	0	1	1	1	3	0
YNL282W	522	215	304	351	267	138	319	208
YBR286W	5241	2857	4559	3987	3835	1628	3697	2699
YGL144C	1038	476	708	517	753	214	685	464
YDR190C	4045	1685	2601	2466	2644	1006	2625	1715
YAL031C	925	459	687	407	681	224	716	326
YBL006C	755	290	550.796	542.439	441.897	190	486	373.626
YNL132W	4412	2078	2453	2316	3328	1081	2904	2111
YBR264C	389	171	225	251	251	106	267	219
YBR231C	757	337	499	555	475	221	496	307
YLR162W-A	0	0	0	0	0	0	0	1
YPL197C	20.028	5.015	1.001	4.005	3.005	7.033	4.004	0
YHR076W	932	461	721	619	747	302	782	532
YDR462W	887	416	656	643	531	228	615	348
tP(UGG)Q	0	0	0	0	0	0	0	0
YJL148W	3049	1357	1766	1949	1898	608	1845	1549
YIL057C	559	216	429	369	298	149	759	424
YPL055C	922	393	633	622	489	245	621	498
YLR353W	770	385	585	417	698	287	662	353
YIL020C	523	203	395	276	370	144	436	253
YIL148W	14250.4	5024.74	8625.71	9559.42	10380.4	4459.16	10535.7	7948.75
YNR016C	12177	5351	8291	7482	16703	6875	17243	10850
tY(GUA)J1	5	0	0	2	1	0	4	1
YFR036W	403	219	308	308	264	105	235	214
YER023C-A	2.052	0	0	0	0	0	0	0
YHR114W	1039	625	771	593	828	301	877	499
YGR028W	1126	689	865	724	1243	398	1348	976
YER150W	2355	1296	1949	1666	911	378	1207	695
YNL279W	100	41	71	61	89	37	82	68
YDR400W	714	327	510	405	953	323	1069	715
YDL068W	2	2	0	1	5.073	0	0	3.119
YOL027C	4144	1905	2514	2602	3856	1565	3346	2441
YPL257W	101	59	92	73	65	26	84	49
YPL120W	362	193	300	177	251	80	287	151
YOL145C	2859	1474	1865	1402	2364	676	2141	1322
YJL099W	973	545	758	493	687	265	666	395
YHR149C	2501	1083	1502	1277	1800	743	1596	797
YDR395W	3537	1771	2153	1830	2455	807	2562	1659
YOL110W	432	217	329	315	307	154	303	199
YDR005C	1350	749	1148	730	1157	319	1125	672
YMR311C	1719	805	1253	1106	1135	471	1334	875
YHL041W	0	0	1	0	1	1	0	0
YBL039C	8173.42	3119.41	4535.02	5035	5234.19	2136.16	4960.34	3688.37
YGR188C	463	241	357	264	443	145	391	279
YOR362C	2974	1350	2204	1913	2054	834	2049	1400
YPR106W	501	271	328	303	266	105	314	215
YLR126C	509	278	383	387	518	249	664	600
YDL053C	1598	716	1169	1003	1268	495	1247	830
YML074C	3612	1569	2398	2655	3069	1265	2759	2354
YKR062W	1648	702	998	959	919	357	858	665
YBR235W	1674	821	1146	917	1086	467	1163	784
YER010C	742	372	579	478	520	211	548	336
YML003W	149	97	120	73	124	25	124	70
YMR097C	721	340	572	424	582	230	651	444
YDL133W	905	488	715	466	813	310	659	356
YNL330C	1228	562	907	741	973	363	1001	592
YGR228W	47.161	8.065	11.066	10.085	16.135	11.241	14.089	7.027
YHR096C	1543.03	1226.82	1684.53	1007.4	609.598	236.782	710.771	506.643
YBR008C	763	397	576	486	464	171	553	343
YDL035C	1773	956	1315	1136	1276	487	1436	937
YMR253C	333	146	253	150	242	80	212	102
YCR102C	72.703	33.013	58.359	76.169	39.389	30.604	58.873	81.583
YJL127C-B	566	249	514	337	562	140	593	361
YOR257W	495	240	377	293	413	142	402	261
YGR002C	879	427	602	471	628	204	609	334
YEL041W	328	237	308	184	315	96	308	170
YGR075C	153	82	101	75	139	28	136	68
YGR253C	2734	1148	2018	1647	1883	727	1925	1234
YDR510W	2135	994	1728	1756	1746	837	1912	1514
YEL014C	0	0	0	0	0	0	0	0
YPL050C	2728	1286	1966	1644	2527	879	2245	1522
YMR166C	545	253	454	305	435	190	474	245
Q0115	0	0	0	0	0	0	0	0
YPR045C	603	308	483	320	513	160	420	265
Q0110	2.121	0	0	0	0	1	3.373	0
YPL231W	16728	6239	8980	9677	23017	9258	18684	12730
YLR148W	725	489	605	423	597	145	621	335
YMR137C	456	273	397	277	385	122	465	240
YDL082W	10158.6	3793.53	5776.23	7186.18	7204.95	3148.14	7005.32	5627.85
YKL155C	1736	892	1263	954	1271	462	1217	733
YBR162W-A	1201	501	982	951	1043	471	1202	1081
YFL042C	842	464	727	546	574	272	725	409
YBL083C	261.497	117.564	193.087	204.483	216.326	80.881	221.007	180.004
YDR148C	2609	1334	2080	1480	6185	2396	6362	3228
YHR052W-A	329.163	169.746	307.506	213.32	160.695	69.985	252.226	126.518
YPL096W	461	235	393	250	351	142	344	201
YDR335W	1921	1031	1372	950	1927	575	1473	824
YPR141C	476	333	400	245	488	135	482	210
YJL067W	2.003	3.017	1	1.003	0	0	1.004	0
YMR039C	1320	601	905	904	1193	457	951	849
YIL058W	26	10	11	15	8	2	9	8
YNL320W	525	255	387	288	465	126	440	288
YPL078C	2571	1247	2007	1579	6454	2344	5870	3504
YCR095C	534	299	380	299	472	132	433	246
YLL011W	2655	1260	1673	1658	1976	782	1779	1224
YCR077C	3755	1975	2377	2003	3053	1044	2546	1592
YLR437C	502	185	314	320	261	103	278	171
YFL064C	492.626	160.872	309.109	280.149	165.681	114.549	336.368	149.452
YNL191W	1347	557	785	807	730	268	580	476
YDR237W	1424	650	1091	851	1252	447	1215	710
YJL110C	1728	904	1161	923	1370	453	1277	668
YKR048C	4671.95	2248.98	3344.95	2865.94	3367.87	1423.96	3215.94	2161.89
YBR001C	957	476	835	519	715	285	895	450
YPL003W	214	131	177	138	213	83	254	140
YKL108W	699	263	456	404	535	204	482	278
YGR110W	301	202	319	193	363	157	444	266
YJR074W	715	307	587	557	901	379	901	613
YPR127W	1546	1008	1524	1195	966	410	1027	654
YIR028W	52	37	42	37	45	17	46	39
YAL012W	5698	2622	3399	3919	4270	1971	3502	2603
YMR288W	1178	546	770	615	908	302	877	526
YIL156W	811	428	600	401	736	263	721	403
YBR241C	737	465	718	400	509	249	492	257
YHR063W-A	3.01	1.004	2.01	2.016	0	2.029	2.006	0
YJL212C	180	54	117	142	82	37	67	83
YPL156C	389	206	276	156	436	133	409	234
YNL312W	1470	679	1041	979	1145	452	1114	637
YLR187W	694	334	487	364	570	229	472	312
YDR099W	4502.64	2792	3891.9	3148	4378.73	1614.31	4099.24	2882
YKL133C	806	453	637	440	447	126	515	293
YLR400W	5	1.003	6	2	3	0	4	3
YHR170W	8280	3467	4249	4966	5053	1839	3915	3315
YDR259C	595	336	528	410	248	79	285	219
YKL068W	2937	1458	1936	1836	2051	822	2205	1422
YOR032C	752	408	362	297	203	67	149	108
YKL093W	1834	986	1449	1051	1279	592	1302	767
YMR002W	3658	1605	2871	2642	2933	1243	2514	1587
YLR145W	423	192	322	312	308	133	288	175
YLR261C	208.06	79.402	156.745	141.287	221.76	74.255	198.272	157.662
YDL246C	185.204	122.424	132.466	138.219	211	91	144.772	143.291
YER081W	1424.89	744	1078.81	765.848	1022.38	327.517	749.509	540.36
YPL178W	1205	563	815	809	1011	359	838	599
YMR172C-A	2	2.091	0	0	1	1.035	0	0
YPR202W	272.298	213.791	209.345	143.293	426.891	41.58	286.962	167.11
YIL096C	1532	727	851	1016	892	279	690	626
YOL046C	0	3.006	1	3	1	0	1	0
YFR011C	1000.98	454	681	568	1674	459	1394	916
YIL074C	1606.55	759	1128	1007.59	1609.62	536	1234.63	895.64
YGL173C	4197	2127	2896	2262	3887	1362	3384	2134
YHL008C	1730	895	1098	1075	1265	455	998	641
YLR457C	559	258	416	311	383	158	458	263
YNL249C	483	247	413	301	352	136	442	398
YGR056W	1550	837	1110	878	1263	471	1289	790
YGL065C	484	269	418	267	535	163	592	293
YOR052C	3619	1582	2389	2706	1751	683	1556	1404
YGR116W	3188.99	1663	2189.99	1581	2949	976.993	2552	1508
YOR343C	87	32	62	73	116	59	132	90
YGL230C	36	11	26	12	35	11	45	15
YOL159C	402	322	432	255	301	81	343	220
YBR185C	891	512	622	473	925	227	821	464
YOR010C	180	89	149	105	109	39	99	80
YDR290W	0	0	0	0	0	0	0	0
YDR019C	364	244	282	369	544	164	182	240
YBR150C	693.015	397.255	541.598	356	579.979	173	597.315	352.979
YIR042C	212	87	171	171	81	29	120	94
YFL031C-A	0	0	0	0	1	2	1	0
YER119C	585	307	661	341	483	213	569	302
YMR196W	1428	1153	1526	782	1103	441	966	460
YMR161W	725	313	507	442	539	230	557	346
YDR499W	692	349	537	378	565	173	575	389
YKL068W-A	1008	388	573	502	702	187	474	341
YJL133C-A	166	94	224	151	112	46	228	153
YHL046W-A	0	0	0	0	0	0	0	0
YDL215C	7074	3970	4046	3583	6690	1892	4696	3939
YJR120W	77	29	54	33	139	68	97	81
YLL061W	809	354	435	449	777	281	628	452
YDR110W	1491	692	857	878	1207	316	996	687
YDR419W	672	349	564	373	514	172	510	268
YOR221C	1319	662	1097	758	857	340	841	489
YPL214C	1217	608	1023	742	769	306	877	527
YBL108C-A	28.166	12.479	17.032	17.595	32.659	11.447	18.184	9.347
YGL165C	3.011	1.006	6	5	6	0	7.042	6.049
YOL064C	998	486	736	674	761	288	727	446
YBL023C	1622	737	1125	817	1210	435	1103	592
YOR274W	862	422	586	489	855	325	747	541
YOR329C	2249	1148	1542	1261	1680	699	1447	841
YLR005W	1336	618	942	842	935	414	1059	659
YDR124W	62	33	62	35	116	36	94	65
tI(UAU)L	0	0	0	0	1	0	0	0
YNL267W	1599	767	1126	965	1335	510	1339	947
YBR134W	2	0	1	0	1	0	0	0
YLL047W	0	1	0	0	1	0	3	2.131
YLR461W	3.777	2.881	1.187	1.824	0	0	2.905	0
tI(UAU)D	0	0	2	0	1	0	0	1
YLR050C	448	252	446	279	449	183	476	369
YOR124C	1354	918	1145	678	1317	433	1149	615
YDR067C	498	318	369	273	493	113	371	281
YMR056C	694	296	568	472	504	196	486	334
YHR032W-A	143	70	126	107	75	41	111	65
YJL044C	1479	701	931	914	1083	329	960	737
YPR164W	1313	777	842	668	1161	321	1049	645
YEL060C	6138	3638	4949	3135	4829	2193	3999	2141
YHR195W	1105	494	669	635	694	285	602	419
YLR101C	16.054	11	17.133	14.067	16.157	7	25.157	8.033
YBL107W-A	5.534	5.304	9.237	3.441	25.26	3.277	20.917	6.341
YML026C	12935.2	4522.86	7735.34	8256.56	10482	3767.47	10013.6	7386.36
YPR066W	213	98	131	110	121	39	125	91
YDR073W	861	388	653	597	583	265	592	427
YDR229W	963	477	687	532	736	295	620	409
YDL181W	635	341	549	483	2020	772	1852	1141
YBR022W	520	286	418	323	388	106	387	228
YER177W	15992	6849	11557	12664	11731	5436.69	11642.7	8324
YML048W	4457	1882	2784	2658	3442	1387	3142	2286
YBL064C	4566	2772	4396	3138	3214	1491	3842	2383
YIL045W	167	101	166	96	148	44	137	81
YKL221W	55	25	55	42	42	10	34	37
YGL126W	1559	854	1120	1322	1535	704	1870	1569
YLR167W	33439.9	11574.8	19734.1	21959	26094.9	9760.23	24856.2	19129.2
YMR270C	971	432	653	546	674	282	744	453
YLR293C	12009	4814	7157	8501	7783	3491	7360	5731
YLR228C	605	296	376	337	618	237	604	357
YJR053W	321	168	231	191	291	95	263	154
YJL171C	3536	1612	2055	1992	2152	975	1626	1312
YDR374C	42	27	39	24	13	2	22	13
YKL021C	1651	772	1031	905	1237	402	1166	750
YDL167C	2848	1295	1707	1637	1882	744	1890	1230
YLR388W	4661.43	1651	2804	3029	4011	1597.48	3758	2745.92
YLR373C	718	460	577	364	868	249	796	440
YKR001C	2774	1292	2080	1417	2733	920	2540	1486
YKR054C	799	458	596	489	807	233	716	502
YIR034C	876	422	810	654	559	223	660	504
YGL013C	2156	1167	1475	1132	1481	413	1293	782
YJR068W	1319	607	895	834	1002	394	912	737
YGR207C	1476	692	1115	1006	1258	475	1205	835
YDR212W	3413	1567	2226	2001	2880	1034	2553	1698
YNL052W	1148	583	1035	720	5505	2173	4870	2668
YGL188C	183	96	152	92	651	168	476	310
YNL025C	364	205	294	219	255	78	252	160
YGR121W-A	6	8	8	1	5	3	7	7
YGR091W	528	274	389	348	377	151	410	260
YDL232W	252	79	181	165	166	82	177	125
YPL119C	570	353	430	272	331	149	331	167
YLR242C	137	87	96	111	146	47	151	105
YMR031W-A	0	0	1	0	0	0	3	0
YJR148W	2486	1253	1965	1819	1770	804	1558	1181
YJR082C	862	429	747	620	549	209	697	448
YOL087C	2124	1128	1510	1150	1862	682	1498	958
YNL134C	6697	3438	4748	5235	3001	1373	3243	2593
YAL037W	102	67	118	97	121	55	127	90
YGL146C	885	349	484	458	730	324	685	474
YCL075W	0	0	0	0	0	0	0	0
YBR262C	1055	415	784	716	708	295	808	512
YPL199C	936	416	641	636	605	294	730	535
YML101C-A	11	1	5.334	2	4	0	9.216	7.244
YFL036W	4688	2411	2805	2351	3506	1151	2850	1614
YDL209C	688	343	444	390	525	155	449	253
YIL051C	3876	1861	3110	2622	2945	1164	3047	2131
YPL057C	6189	3109	4013	4017	4459	1573	3867	2978
YNR010W	284	130	181	154	251	84	179	111
YDR365C	4544	1919	2529	2727	2863	1078	2586	2107
YLR308W	15	7	12	13	3	2	4	7
YNL169C	497	273	343	296	1191	448	1148	808
YFR034C	960	445	717	625	664	300	724	348
YHR070W	2630.97	1053.9	1400.96	1660	1148	575.921	1209	962.832
YDR460W	732	376	560	490	548	219	548	401
YNL112W	29512	9395	8806	17942	17893	6953	11870	15013
YHL047C	848	379	527	427	448	178	517	369
YOR360C	8720	4703	4485	4376	4997	1183	3245	2529
YOR335C	11624	5300	6233	6377	8216	2983	7034	4787
YDR354C-A	0	0	0	0	0	0	0	0
YKL100W-A	0	0	0	0	0	0	0	0
YGL251C	474	263	387	269	404	111	331	222
YER156C	2400	1042	1467	1570	2190	944	2264	1705
YPL255W	520	239	353	289	507	184	386	195
YOR095C	2346	970	1218	1352	1984	702	1866	1416
YEL038W	1565	780	1049	1169	805	385	709	660
YCL014W	1308	664	958	733	1103	399	978	578
YOL025W	645	399	502	358	496	182	554	279
YPL208W	789	397	563	393	636	229	631	372
YOL147C	1193	533	840	835	800	314	893	686
YNL280C	1423	605	978	807	876	346	874	707
YDR007W	10199.9	4442.81	8318.77	6499.75	1080.84	477.962	1263.89	839.694
YIL160C	383	185	285	250	271	97	212	193
YPR089W	1570	859	1059	743	1517	436	1241	690
YBR233W	634	332	555	398	724.995	291	754	433.992
YPL122C	641	373	421	317	641	175	487	335
YKL104C	10074	5746	7367	6096	9130	3528	9070	7654
YMR313C	1158	620	760	561	805	305	703	438
YGL179C	629	347	454	517	837	295	622	679
YGR120C	329	189	263	238	325	95	323	232
YML001W	978	464	769	571	915	327	918	600
YLL028W	3691	1465	1757	2057	1633	623	1150	834
YER016W	541	224	402	359	549	232	506	314
YHR061C	455	223	319	218	367	202	398	208
YDR438W	365	193	285	213	302	80	287	155
YNL211C	116	71	92	47	150	16	129	76
YLR124W	5	3	0	2	3	1	2	4
YML058W-A	61	31	48	61	43	27	82	109
YLR026C	1105	469	776	618	708	270	682	433
YJR065C	3247	1565	2726	1946	2634	1076	2531	1513
YDL131W	3678.99	1608.67	2473.38	2551.09	2850.31	1262.33	2879.31	2235.24
YMR095C	41	22	49	27	20	5	17	17
YER138C	21825.4	8556.61	13587.3	10932.3	15039.1	5834.9	14651.5	8314.03
YDL033C	633	220	406	403	295	156	431	273
YMR255W	734	346	573	499	543	208	540	391
YHR209W	1805	1243	1755	1187	1216	405	1220	817
YGL247W	241	133	173	153	259	73	224	149
YCR100C	45	27	40	19	31	19	64	24
YDR516C	2259	1423	2180	1178	1785	796	2100	1121
Q0130	4	2	4	1	3	1	9	7
YPL233W	600	242	395	361	368	174	410	253
YOR255W	14	1	8	7	7	1	3	7
YOR063W	64564	25902	39527	42897	42173	18856	42819	34014
YOR200W	0	1.025	1.006	0	0	0	2.033	0
YGR251W	677	288	409	428	418	213	410	302
YPR047W	702	420	545	368	557	198	501	274
YDR246W-A	13	5	4	9	12	7	7	3
YDR044W	1105	463	763	855	743	380	1075	765
YEL016C	783	411	632	576	552	213	599	359
YAL027W	296	127	201	181	191	77	261	144
YKL153W	30.024	17.034	11.014	26.03	13.015	20.051	11.01	11.016
YFL019C	26	27	19	6	12	5	23	7
YMR139W	529	288	471	265	551	168	529	294
YDL080C	986	415	609	699	656	262	708	545
YOR172W	735	471	566	430	840	231	783	505
YOR105W	271.135	169.3	248.175	164.603	199.487	55.87	240.246	120.762
YJL138C	19100.1	7440.17	10669.9	11816.5	11503.7	4792.52	11246	9032.14
YPR143W	1967.99	745	1186	1335	1316	488.997	1164	916.992
YDR340W	132	161	106	70	240	36	151	80
YNL322C	3504	1532	2634	2387	2458	1155	2417	1703
YPL090C	19053.7	7164.36	10743.2	12428.1	15502.3	6232.32	14317.4	11239.8
YPR078C	179.71	101.005	66.559	133.831	93.179	36.666	47.187	73.1
YCR075C	161	75	118	108	131	53	150	55
YFL062W	38.782	12.396	39.651	15.355	19.09	6.732	11.722	3.775
YDR171W	1922	1715	2753	1259	1033	444	891	389
YLR439W	1958	841	1145	1185	1499	683	1439	892
YCR020C	193	143	165	141	184	68	186	101
YDR450W	13256.8	4792.14	8077.66	8891.44	10942	4329.53	10666.4	7889.64
YCL051W	799	342	553	477	604	222	541	357
YCR097W	566	267	465	383	642	153	575	403
YBL039C-A	28.581	12.595	14.979	0	12.81	4.845	18.662	7.629
YDR235W	431	306	354	183	483	98	393	204
YGL194C-A	75	55	98	80	96	26	113	104
YER038C	402	219	287	276	282	86	269	213
YPR125W	3704.99	1675.99	2018.97	2338.99	2726.95	1013.98	2173	1842
YHR049W	8293	3975	4471	5482	4615	1818	3913	3308
YBR007C	1230	669	882	697	928	314	948	575
YPL001W	672	407	465	357	631	148	486	333
YJL038C	45	26	33	21	23	8	18	25
YNL319W	2	2	1	2	3	1	1	3.677
YPR178W	717	331	537	439	465	187	516.986	331
YER079C-A	0	0	0	0	0	0	0	0
YDR475C	1051	538	823	590	766	321	792	392
TLC1	1158	560	840	935	1741	458	1632	1067
YNL159C	271	171	261	161	216	98	263	157
YAL014C	776	383	582	564	633	225	599	450
YCR020W-B	213	128	147	89	249	50	200	103
YBR243C	549	335	479	399	685	243	797	527
YLR181C	686	346	558	420	579	247	578	340
YBL056W	2208	1138	1590	1332	1921	638	1912	1286
YNL075W	2276	1000	1302	1380	1632	592	1341	1089
YPL150W	1200	567	914	676	960	343	1010	664
YJL012C	2321	1067	1526	1156	1914	675	1751	1169
YJL065C	674	252	500	474.994	411.997	208	505	318
YKR020W	282	139	231	232	234	84	283	179
YMR053C	236.596	135.543	221.151	102.729	180.562	66	192.947	82.689
YKL066W	353	218	341	221	534	170	722	351
YMR004W	657	370	624	442	653	213	649	344
YER083C	1323	621	977	877	901	435	946	684
YPL176C	1464	776	1286	849	1212	453	1196	651
YHR172W	492	246	428	246	507	147	469	194
YLR263W	1392	732	974	785	1265	379	1139	708
YDL240W	813	429	585	356	907	273	794	407
YDR401W	24	8	15	20	12	3	3	15
YGL118C	4	2	2	0	3	1	1	3
YHR013C	947	445	682	678	827	343	818	575
YOL040C	18203	6705	10864	13021	14120	6284	13913	10592
YGR072W	835	484	690	560	647	221	676	416
YCL035C	3102	1613	2886	2640	1759	806	2225	1521
YIL023C	4994	2520	3843	3590	2689	1224	2884	2317
YNR073C	370.579	223.976	333.121	201.993	241.395	133.115	659.325	344.105
YPR200C	104	52	73	72	88	20	69	48
YIL072W	327	188	305	228	255	103	308	322
YLR327C	3413	1651	3908	2173	1591	760	4434	1638
YBR229C	1301	715	1057	660	1265	428	1043	623
YML133C	75.412	98.023	9.211	34.337	146.633	49.599	72.733	56.491
YOR131C	633	311	467	470	453	219	448	295
YLR455W	791	371	566	461	632	225	535	298
YNL247W	4210	1924	2640	2554	3676	1243	3253	2325
YOR054C	742.543	401.767	684.125	439.755	485.616	210.428	782.925	438.718
YGL007C-A	5	1	11	8	4	8	14	9
YFR028C	1344	644	936	856	1120	434	1090	647
YGR290W	3	2.026	1	2	2	3.083	0	2
YOR009W	404	174	240	204	379	160	254	186
YOR072W	9	6	5	2	6	0	6	7
YDR292C	1843	855	1237	959	1551	523	1434	885
YOR161C-C	10	5	5	2	3	3	3	2
YHR126C	410	128	115	464	71	18	33	147
YMR194W	4535.41	1656.32	2802.58	3277.89	3082.98	1421.54	3205.84	2535.53
YAL016C-A	5.067	2	3.081	1.017	1	2	0	0
YMR167W	800	404	584	401	605	214	595	366
YOR249C	501	359	383	211	488	94	485	213
YER117W	12290.2	4242.92	7211.19	8356.83	9803.44	3969.42	9519.29	7027.3
YOR301W	325	157	265	284	309	142	311	222
YPL187W	166	72	103	112	90	35	70	53
YKL218C	399	205	318	274	322	116	289	193
YOR140W	1690.99	855	1186	1080	1266	557	1246	762
YDR391C	774	451	728	567	454	165	538	330
YLL063C	291	110	195	168	173	74	204	104
YAR070C	0	0	0	0	0	0	3	0
YOR276W	1816.96	834.987	1230.98	1283	1773.98	621.98	1611.99	1164.98
YMR309C	8919	4868	5162	4080	8511	2041	6358	3990
YOR089C	1855	843	1469	1202	1274	506	1222	825
tD(GUC)N	13	4	4	2.736	12.703	6	6.461	7.958
YGR258C	3404	1590	1967	1954	2059	683	1645	1333
YNL146C-A	59	29	44	29	32	8	55	27
YMR180C	939	458	742	566	595	252	753	506
YGL163C	1712	820	1177	918	1015	416	936	570
tD(GUC)Q	0	0	0	0	0	0	0	0
YDR417C	20.027	2.003	3.004	2.002	4.007	6.018	2.002	3.006
YOL131W	6	3	11	4	5	1	5	1
YOR011W-A	0	0	0	2	0	0	1	1
YPL283C	2952.7	1305.89	1934.07	1464.38	2191.05	672.475	2341.52	1076.17
YBL021C	295	110	206	214	309	140	354	244
YHR215W	288.485	174.025	294.729	225.218	234.597	87.955	333.484	204.553
YLL045C	21923.4	7935.65	12573.6	15070.4	16792.7	7442.25	16345.1	13018.3
YLR156W	0	0	0	0	0	0	0	0
YLR007W	2867	1204	1749	1919	1328	604	1295	1111
YNL261W	737	447	549	431	480	150	426	302
Q0092	0	0	0	0	0	0	0	0
tE(UUC)Q	0	0	0	0	0	0	0	0
YNL305C	1041	581	955	528	584	280	649	355
YJL046W	592	350	499	340	433	135	481	298
YKR078W	480	285	353	259	412	108	398	288
YOR191W	1879	809	1187	951	1524	578	1349	798
YEL074W	31	22	22	23	39	13	32	19
tE(UUC)M	0	0.5	0	1	0	0	0	0
tI(GAU)Q	0	0	0	0	0	0	0	0
YOL166W-A	0	0	0	0	0	0	0	0
YDR272W	1518	783	1312	975	1136	448	1096	722
YGR289C	1060	534.974	771	555	696	265.917	680	377
YML020W	853	416	710	469	743	270	709	406
YLR103C	993	395	581	511	965	293	815	408
YOR294W	2859	1104	1726	2058	1830	707	1750	1455
YEL062W	680	341	437	467	441	144	395	331
YPR064W	8	1	6	3	2	1	3	3
YPR031W	944	453	684	521	677	263	641	416
YLR038C	1378	797	1281	762	3702	1267	3191	1795
YNL096C	8106.4	3279.35	5020.98	5485.43	6511.94	2606.43	5832.82	4325.31
YDR038C	2220.28	1094.02	1359.23	1197.64	1565.54	580.86	1757.28	982.079
YPR160W-A	0	0	0	0	0	0	0	0
YDL187C	65	30	44	39	19	5	13	21
YBR024W	684	370	566	433	490	185	467	277
YER171W	1458	741	897	762	1134	371	982	698
YDL047W	2784	1140	1765	1788	1736	774	1907	1273
YML046W	723	495	478	390	780	197	648	345
YGL124C	771	444	576	386	585	173	539	346
YMR276W	2882	1412	2287	1924	1998	1007	2266	1546
YEL059W	20	7	19	11	16	11	15	23
YDL160C-A	148	69	99	88	101	35	126	92
YLR165C	420	203	287	230	281	96	331	184
YCR069W	1838	925	1521	1128	1249	547	1413	850
YKL223W	0	0	0	0	0	0	0	0
YGR146C-A	3	6	4	0	7	1	6	6
YKL027W	2365	1146	1390	1720	1644	689	1635	1344
YJL173C	885	362	703	579	775	287	806	525
YDR152W	2259	937	1507	1494	1452	592	1550	1154
YKL127W	690	392	567	414	1013	482	1002	601
YDR309C	4639	1618	2256	2235	2745	1073	1936	1368
YLR386W	1004	495	744	479	953	293	894	495
tN(GUU)Q	0	0	0	0	0	0	0	0
YLR371W	2005	988	1299	897	1680	597	1433	791
YDL169C	325	195	286	205	170	67	165	135
YLR092W	284	104	244	172	292	125	279	197
YER044C	2098	1105	1686	1114	1653	533	1454	928
YMR072W	2337	1114	1782	1616	1860	744	1920	1490
YJR033C	1024	545	846	486	832	311	833	428
YKR056W	4403	2062	2485	2489	3002	1132	2543	1927
YGL011C	2707	1211	2122	1847	1859	749	1997	1419
YIR036C	984	507	888	659	647	341	784	436
YMR123W	822	310	488	527	673	253	572	551
YDR406W	6339	3687	4993	3276	1538	580	1375	715
YGR073C	59	41	51.454	47.227	41	17	61	30.218
YGR209C	3080	1550	2715	2178	1483	591	2078	1544
YJL150W	4	3	6	2	1	0	4	1
tS(UGA)E	3	2	4	3	4	1	4	0.5
YNL050C	1384	652	883	884	909	337	885	667
YMR304C-A	963.163	517.849	543.9	509.658	947.153	238.511	622.015	470.629
YLR240W	705	416	561	385	549	206	615	293
YGR093W	1511	775	901	912	1133	341	1017	743
YDL234C	2092	1175	1809	1133	1525	588	1288	881
YPR108W-A	2	0	3	0	0	1	3	1.331
YNL136W	994	430	760	698	626	232	774	438
YKL049C	697	313	505	466	434	168	429	287
YJR080C	1089	560.635	862.867	678	1615.93	601.531	1518	896
YNR038W	2008	993	1163	1067	1566	471	1305	916
YGL140C	1522	740	1056	764	1362	458	1118	659
YCL029C	925	400	720	580	655	310	747	502
tY(GUA)Q	0	0	0	0	0	0	0	0
YFL038C	5270	2524	3986	3697	4021	1836	4114	2739
YJR131W	746	337	585	422	562	227	512	299
YNR012W	1638	752	1016	1001	1168	426	1054	687
YNL110C	4004	1688	2328	2685	2745	888	2328	1974
YAL068C	0	2.068	0	0	0	0	0	0
YDR367W	416	243	331	204	583	114	433	268
YIL053W	39091	14280	20537	31622	13118	6164	13302	14801
YPL059W	1229	551	996	846	845	339	921	570
YGL253W	26667	10616	15950	16289	17769	8314	25402	17945
YHL032C	3443	1841	2401	2283	3698	1771	4379	2307
YJL010C	1905	934	1120	1058	1491	471	1298	876
YHL045W	2	5	1	2	1	1	1	1
YOR337W	3085	1542	2013	1836	2124	809	1688	1223
YMR010W	2219	1329	1439	1217	2029	511	1395	1115
YOR097C	337	174	303	175	248	91	237	142
YHR118C	578	247	447	347	323	149	443	244
YGR024C	1079	623	769	520	779	193	791	509
YOL023W	1110	638	811	558	875	299	788	440
YPL253C	318	216	294	192	298	103	309	137
YOR008C-A	1	1	0	0	1	1	0	0
YER154W	2218	948	1407	1440	1811	844	1863	1530
YBR300C	2	0	0	0	2	0	0	0
YEL036C	4842.33	2151.43	3077.89	3101.2	3235	1287	2889.89	2267.91
YBR260C	915	448	683	478	705	263	689	429
YPL124W	283	141	223	155	233	79	247	100
YAL042W	2898	1280	2137	1966.98	2471	1065.95	2383.99	1742
YAL035W	8080	3629	4940	4832	5977	2414	5479	3621
YNL286W	548	256	480	398	416	131	486	297
YDR001C	7457	3894	5396	4098	4235	1645	3593	2613
YIL162W	19091	7548	12945	10010	9381	3926	14176	7897
YOL141W	434	233	249	191	353	109	289	195
YHR145C	24.395	42.441	19.48	0	90.68	5.643	47.06	24.765
YBR195C	715	299	508	414	459	182	457	314
YIL039W	1799	797	1263	1056	1734	547	1454	1144
YGR122W	359	212	278	179	356	108	409	246
YPL092W	416	231	364	238	524	171	422	270
YGR161C-D	2103.74	1284.47	1713.54	746.56	2231.23	669.693	1492.12	593.417
YMR315W	2357	1435	2414	1881	2337	1063	3068	2316
YGR213C	81	45	64	43	18	9	30	51
YDR384C	1846	903	1274	1084	1014	564	1104	784
YML007W	4254	2057	2846	2443	2714	894	2431	1612
YER063W	1052	514	742	721	869	358	882	612
YDR481C	2401	1118	1808	1491	1655	670	1700	1280
YER014W	1087	451	786	698	607	241	590	455
YPR041W	6863	2931	4000	4395	4738	1863	4142	3173
YNL213C	1108	483	709	638	861	258	744	474
YKL006C-A	716	326	640	532	511	198	575	397
YDL159W-A	0	0	0	0	0	0	0	0
YBR058C	2194	1076	1452	1086	1561	517	1502	933
YLR024C	700	329	461	348	549	172	538	353
YLR071C	1538	858	1083	735	1450	443	1245	746
YHR092C	8627.42	3392.45	2920.03	5996.84	6200.11	1735.67	2919.31	3569.54
YDL199C	251	156	205	121	245	74	186	100
YHL007C	4749	1937	2778	2954.99	3092	1256.99	3055	2306
YER181C	4	5	4	0	2	0	4	1
YNL228W	8.032	7.09	4.011	4.029	7.063	0	7.021	9.034
tV(AAC)O	0	0	0	0	0	0	0	1.182
YDL064W	772	349	596	471	666	264	594	394
YDL031W	4561	1916	2599	2527	3206	1153	2545	1926
YMR257C	692	541	559	310	871	194	716	332
YBL108W	0	0	0	0	0	0	0	0
YDR046C	3922	1989	2706	2002	2871	946	2323	1112
YOR253W	753	296	558	502	556	192	545	365
YOR202W	0	0	0	0	0	0	0	0
YEL010W	0	0	0	0	0	0	0	0
YGL245W	6564	2787	4157	3845	5962	2460	4826	3297
YGR006W	232	118	215	152	158	60	167	119
YGR079W	9945	4367	5491	4676	5461	2270	4287	2455
YDL119C	499	249	391	300	330	116	274	189
YKL151C	1244	820	1458	858	850	363	1100	609
YGL198W	882.968	418.986	638.935	564	587	286.976	637.981	375.957
YDL086W	2510.92	1214.88	2177.9	2035	2030.94	922.836	1932.84	1484.96
YBL091C-A	305	168	259	212	201	75	228	158
YLR361C-A	422	183	301	249	261	90	254	177
YBR141W-A	0	0	1	0	0	0	0	0
YOR170W	0	0	0	0	1	1	1.014	1
YHR038W	552	354	457	367	536	139	432	302
YML069W	2076	1065	1555	1214	2046	721	1754	987
YKR019C	486	182	360	263	353	135	341	211
YJR073C	1239	707	1269	1037	3518	1834	4485	3033
YGR279C	10215	4637	6804	6507	8637.33	3808	7453	4853
YCR073C	1935	1172	1417	1014	1138	436	1183	734
YCR022C	9	3	2	2	4	1	4	9
YLL015W	2004	1155	1480	1056	1527	499	1294	866
YNL195C	182	203	253	144	80	36	103	38
YDL134C	2831.2	1291.65	1851.06	1531.52	2208.35	873.727	1852.51	1167.14
YFL060C	268.969	124.846	204.299	230.293	433.061	109.145	437.518	249.325
YDR173C	299	164	268	214	301	118	333	201
YMR100W	1224	585	836	590	1017	277	812	487
YCL057W	2208	1195	1755	1313	2333	863	2308	1276
YOR335W-A	0	0	0	0	0	0	0	0
YBR072W	20513	11887	21666	14963	3342	1178	6167	3769
YBR005W	928	474	726	726	674	321	565	496
YPR123C	37	10.056	7.056	18	24.224	7.121	19.172	26.355
RUF5-2	682.435	495.267	678.365	447.55	435.944	138.547	633.268	291.985
YDL173W	1169.95	518.973	903.993	806.932	1061.99	437.917	1042.98	755.992
YJR047C	102.031	46.028	52.025	93.076	23.007	13.005	31.008	33.012
YMR006C	2079.66	893.279	1367	1633	1081	457	1606.33	1011
YKL145W-A	31.102	21.568	14.086	24.886	16.193	5.53	22.264	12.177
YAL016W	2878.93	1583	2028.92	1541.98	2479	817	2128	1339
YMR292W	320	188	220	168	429	77	356	193
YHR011W	509	307	381	315	419	180	392	246
YPL152W	416	261	359	240	294	109	308	191
YLR183C	919	376	646	511	1033	350	927	480
YNL077W	841	330	582	457	521	237	590	355
YBR109C	3027	1364	2261	2004	2298	942	2362	1608
YBR172C	5016	2313	3159	3067	3958	1620	4320	2563
YDR346C	4765	2032	2612	2975	3636	1290	3070	2661
YAR002C-A	3092	1566	2347	2203	3578	1211	4024	3024
YOL077W-A	1468	621	1092	965	2557	885	2264	1449
YPL029W	1101	525	809	670	863	325	755	481
YHR146W	1746	710	1338	1452	1287	520	1320	1167
YNL019C	0	14	0	0	3.955	0	0	0
YDL242W	7	4	14	4	11	7	19	8
YBR189W	21329.6	7709.34	12107	14650.7	17533.2	7147.31	16062.5	12630.6
YER085C	46.99	33	42	35	35	13	39	24
YJL225C	3542.64	1533.98	2359.8	1969.38	2579.1	1121.07	2878.68	1735.7
YKL064W	2265	1058	1648	1285	1784	652	1634	1012
YLR265C	385	257	275	202	359	80	288	167
YKR022C	835	365	597	554	566	207	613	390
YLR287C	920	515	692	477	754	194	767	406
YPL174C	582	359	363	254	556	131	403	280
YOR070C	976	485	754	568	758	307	839	534
YDR403W	364	209	279	219	196	61	217	126
YOL093W	951	415	682	671	722	320	702	484
YOL042W	628	329	482	372	591	161	543	350
YIL070C	3015	1376	2025	1747	2071	695	1927	1156
YCL037C	169	28	75	84	110	64	104	99
YIL025C	12	7	21	5	6	1	15	1
YDR545C-A	39.683	17.289	10.923	18.62	21.221	17.864	10.916	18.953
YNR071C	48	29	55	25	58	15	43	19
YML131W	1476	979	1259	863	880	355	975	537
YNL245C	907	367	525	616	589	200	527	488
YNR024W	691.929	291.822	463	507.863	485.828	176	478	353
YFL013W-A	3.003	1.002	1.003	2	4.006	4	0	1.001
tP(AGG)N	1	0	0	0	0	0	0	0
YLR329W	59	34	41	36	38	10	20	14
YPL043W	5700.99	2271	2837	3007.98	3664	1443.99	2848	2205.98
YCL045C	3450	1586	2458	1890.99	2827.98	1030	2527	1596.95
YBR056C-B	9	1	2.017	1	3	2.04	1	0
YKL002W	1333	688	1006	851	902	368	967	599
YDR328C	1914.99	885.986	1585.99	1229.98	1321	528.992	1419	873
YIR009W	236	93	164	162	103	69	130	86
YBR154C	3289	1459	2026	2065	2384	847	2203	1611
YLR001C	964	553	734	438	780	251	831	446
YAR035C-A	0	0	0	0	0	0	0	0
YKR101W	586	337	494	280	478	146	489	262
YMR230W-A	13	5	4	2	16	10	8	4
YER115C	413	193	317	224	361	144	323	191
YHR124W	142	76	102	114	151	50	117	102
YER148W	2269.99	969	1344.98	1349.99	1677	608.994	1516	1149.99
YCR050C	0	1	1	0	0	1	1	3.177
YMR240C	563	250	414	349	494	218	535	306
YOR303W	23767	11962	17403	18047	9731	4061	9855	8177
YIL087C	348	192	395	274	191	102	305	159
YMR192W	1114	666	794	547	949	299	951	498
YCL074W	0	0	0	0	0	0	0	0
YJL221C	687.214	377.523	471.422	364.955	405.581	170.535	513.099	237.963
YMR229C	6889	3221	3626	3190	5970	1705	4743	3135
YLL038C	653	299	418	379	410	214	461	290
YOR056C	4348	1796	2522	2973	2633	1161	2563	2027
YOL108C	205	111	205	142	215	90	265	218
YOR270C	9579	4816	5652	5515	6833	2422	5825	4491
YDR106W	25	22	26	15	34	7	32	19
YOL068C	2287	1089	1577	1327	1662	625	1524	1049
YMR182C	2986	1136	1434	1922	969	408	891	825
YBR201W	525	275	451	313	626	211	688	604
YLL043W	2726	1243	1789.64	1457	2024	777	1756	1202
YDR415C	571	264	445	338	461	163	450	289
YGL161C	819	416	639	466	732	273	748	417
YOL133W	491.998	251	352	325	290	130.997	289.999	176
YDL074C	1967	1095	1270	969	1672	521	1386	851
YNL263C	1033	469	791	634	903	364	980	503
YHR217C	10.052	2.011	8.473	6.691	4.608	0	9.722	4.019
YDR128W	1370	640	882	673	1175	414	985	632
YOR193W	244	186	180	179	268	83	310	216
YER028C	198	89	138	115	111	46	127	103
YMR052W	243	121	163	156	158	53	157	117
YIL029W-A	0	0	0	0	1	0	0	0
YMR294W-A	7.033	0	3.016	6.004	3.008	5.051	2.006	0
YKR076W	1087	551	912	702	665	248	623	387
YDR225W	7250.2	2853.4	4440.74	5407.24	5213.97	2500.57	5255.79	4748.99
YDR270W	700	387.95	581.965	286	493	177	537	274
tL(UAG)J	1	2	0	0	0	0	1	0
YPR033C	5419	2273	3178	3339	4097	1528	3833	2627
YGR230W	392	206	393	306	294	124	339	203
YPR062W	2223	939	1316	1639	1536	622	1335	1139
YDR528W	1143	497	680	499	934	300	793	382
YER173W	716	326	519	403	601	232	577.98	331
YBR026C	2015	1165	1844	1251	1459	654	1589	817
YDL185W	11903	5645	7427	7191	8035	3021	6866	4533
YBR091C	338	127	228	221	255	135	298	216
YNL094W	1503	748	1099	876	1182	525	1154	722
YGL056C	6465	2606	3419	4097	4311	1817	3998	3006
YPL227C	1053	540	763	579	950	287	782	516
YLR222C-A	58	50	41	28	75	12	38	22
YDL010W	734	302	495	397	549	184	484.993	275
YML019W	589	297	475	355	598	208	568	332
YDL045C	857	412	730	541	657	234	706	449
YLR163C	1634	705	1154	959	1231	481	1196	789
YLR178C	1407	1362	2367	1279	856	452	1133	518
YKL225W	0	0	0	0	0	0	0	0
YHL002C-A	0	1.006	0	1.003	3.02	0	1.004	2
YJL175W	2.005	0	0	0	0	0	0	0
YBL079W	2254	1209	1475	1049	2100	618	1823	963
YNL056W	966	458	692	637	413	237	519	400
YFL001W	1093	693	769	713	797	263	719	499
YDR150W	2350	1220	1717	1368	2508	836	2153	1229
YER147C-A	27.014	2	10.017	5.007	10	4.006	7	5.014
YKL170W	980	429	640.992	617.999	688.989	276.988	670	505
YPR157W	136	75	156	168	103	46	166	97
YPR137C-B	1701.23	258.617	588.864	1603.18	0	171.384	215.683	750.787
YLR384C	4556	2022	2501	2206	3521	1141	2829	1859
YPL060W	437	206	333	207	317	89	293	201
YML099C	1346	660	1052	671	1046	341.964	1004.99	640
YLR421C	1235	557	927	796	944	327	823	617
YLR090W	1694	658	1047	977	1006	397	862	574
YMR325W	0	0	2.216	0	0	0	0	0
YJR064W	4255	1893	2851	2549	3631	1293	3313	2238
YML022W	2836	1130	1738	1927	1976	722	1854	1566
YER046W	343	160	240	191	258	111	237	162
YMR029C	665	363	557	389	734	250	739	384
YIR030C	47	11	18	19	49	11	44	35
YKR050W	1183	577	918	743	970	444	1131	796
YMR121C	818.183	390.595	713.604	636.786	578.38	269.807	604.569	412.953
YGL017W	805	377	501	489	511	213	507	331
YDL150W	2276	912.999	1345.99	1463	1637	637	1438.99	1007
YNL038W	497	269	375	229	447	85	414	262
YHR001W-A	787	571	795	440	2363	674	2000	1101
YOL165C	8.46	2.666	12.879	11.67	0	2.254	2.204	6.084
YIL139C	380	226	355	221	374	109	345	264
YLR246W	851	387	537	415	562	216	481	323
YJR119C	1558	901	925	895	1048	312	883	658
YLR359W	2869	1419	1839	2206	3307	1117	1622	1617
YLR199C	1282	668	903	782	970	369	1085	804
YJL206C	485	294	371	261	436	143	399	269
YIL142W	4991	2191.99	3139.98	2873.98	3787	1493	3477	2475
YGL082W	747	403	623	458	647	245	616	358
YNL138W	2000	1108	1845	1137	2115	795	1828	997
YOR133W	7933.28	3257.52	5086.17	5062.97	5090.64	2689.59	5757.41	3727.15
21S_rRNA	89	72	80	26	114	38	136	47
YGL142C	723	390	527	374	555	158	473	304
YGR179C	379	180	305	199	299	98	336	157
YGR102C	903	420	641	542	547	302	544	354
YBR139W	855	667	1095	581	958	380	982	497
YHR188C	2191	1132	1773	1379	2183	999	2278	1581
YKL106C-A	3	1	1	1	3	5	4	4
YNL116W	898	418	711	534	644	273	700	405
YNL139C	1112.33	619.985	763.178	564.084	1076.79	305.02	949.491	628.399
YDR361C	1739	769	942	1036	1366	412	1088	919
YLR445W	1	3	1	3	3	1	2	1
YGL255W	7266	3880	5232	3174	12592	4835	10761	7279
YFR007W	549	310	373	288	371	138	347	214
YLR333C	6090	2331.32	3778	4177.31	4692	1794	4276	3286
YHR103W	1820	852	1059	814	1703	554	1517	951
YHL030W	984	587	712	496	956	286	832	400
YGL077C	692	365	566	452	2262	797	1982	1119
YPL204W	7179	3199	4379	4181	4792	1749	4147	2944
YPL251W	6.052	1	5.02	6	2	0	2.006	1.009
YIL009C-A	219	117	201	146	206	81	242	161
YOR091W	2724	1121	1784	1761	1737	740	1819	1296
YGR026W	810	521	709	447	965	224	735	449
YAL040C	9477	5204	6182	4854	5544	2106	5050	3544
YDR288W	491	229	374	269	413	127	449	267
YGL208W	867	370	584	537	531	298	597	390
YNL284C	1280	647	886	717	1205	401	1080	595
YIL164C	258	104	172	178	145	58	167	102
YOL143C	1635	741	1209	1216	1324	593	1272	964
YBR237W	1593	750	1182	837	1102	412	1091	628
YBR197C	480	201	366	350	296	141	349	261
YHR147C	1383	623	1119	890	961	341	1014	610
YJL093C	1515	661	970	825	1076	377	940	690
YPL126W	7701	3601	4099	4195	5198	1634	4117	2983
YMR317W	39	24	29.009	15	19	13	25	30
YOR251C	1351	653	929	960	936	355	986	752
YPR181C	5913	2877	4054	3634	5041	2196	5181	3431
YCL008C	683	318	503	422	531	246	510	281
YOR107W	2767	1091	1266	1446	1047	342	610	492
YML005W	728	360	527	395	663	195	521	354
YNL215W	855	342	568	498	558	240	590	388
YCR075W-A	229	133	219	194	196	91	178	144
YDL059C	161	90	140	112	146	54	113	92
YOR204W	7471	2987	3530	4445	3770	1482	2950	2569
YEL012W	1151	596	966	612	737	310	846	545
YBL040C	761	506	800	425	1164	302	1277	725
YPR043W	10786.7	3934.01	6459.56	7589.98	7972.14	3743.02	8089.92	6098.76
YDR382W	10949	4372	6091	7654	8968	3272	7838	6200
YDR483W	7290	3102	4611	4583	4882	1747	3974	3201
YER061C	558	285	459	422	406	175	348	283
YLR022C	830	354	530	619	582	215	527	398
YLR402W	200	67	120	110	115	58	111	71
YLR073C	1105	438	734	830	702	281	662	609
YER183C	478	188	360	337	379	146	388	286
YHR090C	861	450	651	495	576	218	585	354
YOL021C	4265	1856	2507	2499	2730	1049	2389	1636
YHR030C	5248	3049	4209	3126	3982	1452	3377	2321.86
YBR295W	1694	906	1174	972	981	417	1106	739
YKL018W	827	375	498	462	603	242	497	369
YIL011W	160	84	132	101	71	28	89	40
YEL034W	19524.9	8760.9	14936.9	13303.8	18305	7519.91	17319.9	11397.9
YHL015W	14586	5332	8841	9710	11710	4651	11437	8641
YNR050C	1550	739	1272	1410	908	397	1099	1381
YDR134C	5382.56	2428.8	3355.64	3544.86	3454.7	1192.18	2386.19	1811.8
YKL208W	402	185	311	285	318	127	282	197
YGR004W	354	196	231	192	317	106	316	216
YML110C	2548	1284	2209	1942	1821	785	1927	1331
YGL048C	3062	1410	2237	1944	2203	900	2210	1596
YGL243W	615	285	453	347	492	162	444	303
YKL106W	1030	544	687	635	875	326	971	623
tN(GUU)N1	32	17	23	13	20	3	16	17
YPR029C	1680	953	1147	861	1528	397	1304	826
YJL034W	16513	12545	18172	16484	29830	14274	42502	40394
YFL048C	1620	871	1236	1038	1395	508	1443	895
YLR117C	1353	631	925	709	1032	302	923	625
YOR176W	1124	602	837	882	1282	572	1489	1396
YOR109W	1907	983	1321	942	1578	507	1292	711
YBL089W	552	251	391	314	333	117	396	275
YDL084W	5131	2562	3820	3036	5120	1547	4517	3237
tC(GCA)Q	0	0	0	0	0	0	0	0
YGL116W	871	401	722	535	672	263	649	427
YNR034W-A	2385	1431	2624	1791	1797	666	2586	1378
YCR024C	644	435	556	320	530	157	581	333
YIL102C-A	206	114	164	130	132	45	180	132
YMR102C	2715	1146	1561	1682	826	309	836	529
YCR071C	885	361	593	552	684	279	655	436
YDR175C	1423	657	918	910	1113	420	969	598
YOR189W	429	192	374	330	360	176	397	259
YOR154W	847	461	563	444	923	236	796	533
YPR121W	915	407	608	561	584	230	564	355
YBR070C	588	223	448	364	473	207	538	335
YOR396C-A	0	0	0	0	0	0	0	0
YLL017W	14	5	23	8	12	4	9	13
YDR351W	2321	1253	1615	1177	1624	561	1741	995
YNL315C	1598	707	1185	1015	1134	476	1072	733
YPR174C	713	254	445	462	487	231	493	353
YJR045C	19525	10623	16207	12367	14476	6214	13571	8828
YMR008C	4105.34	2294.72	3400	1955	3334	1191	3232.67	2112
YDR349C	2867	1309	2134	1764	2081	819	2065	1490
YDL171C	4360	1965	2660	2246	3427	1302	3417	1853
YKL062W	3593	1929	2857	2317	1626	606	1592	1023
YJR010W	536	260	371	331	869	253	495	295
YJL218W	70	27	76	38	88	40	119	36
YIL126W	2969	1345	1878	1477	2553	881	2260	1361
YDR093W	1635.93	743.743	996.423	851.349	1422.08	577.708	1366.22	864.067
YMR282C	857	456	583	444	1081	315	932	518
YIL109C	5756	3493	4597	3806	5698	2432	6367	4744
YFL022C	6554	2842	4311	4549	4883	2259	5140	3670
YPL109C	388	236	340	226	393	109	393	218
YJL156C	1355	704	897	646	953	324	889	541
YNL071W	4826	2348	3714	3494	4194	1937	4191	3026
YMR088C	1038	585	790	585	1314	375	1140	727
YGR211W	4020	1792	2423	2576	2573	1117	2302	1818
YKL139W	1095	707	865	610	875	266	826	467
YJL069C	3167	1442	1864	1820	2219	782	1882	1270
YDR323C	250	158	223	141	251	72	229	147
YDR344C	9	8	9	17	10	6	3	8
YJL016W	1450	813	1032	773	953	327	791	449
YDR444W	1131	580.956	833	744	873	338	1053	617
YPL189W	119	64	118	82	56	18	72	43
YLR285W	874	448	698	591	848	276	764	521
YLR267W	170	142	198	77	170	42	185	106
YDL219W	466	270	414	261	599	133	510	301
YNL017C	21	7	9	3	5	4	7	5
YCR024C-A	1959.88	1274.64	1505.39	1324.16	1861.07	454	1468.48	948
YCR024C-B	2250	2026	1755	1790	2445	531	1979	1185
YKR024C	3803	1531	2032	1970	2162	862	1927	1384
YBR156C	712	347	554	394	534	212	548	311
YOR076C	493	374	424	227	608	123	503	277
YEL059C-A	314	121	235	242	210	110	235	180
YDR405W	2323	999	1559	1618	1348	587	1273	1016
YOL091W	154	123	136	115	168	32	130	80
YCL031C	2097	1066	1390	1138	1849	521	1468	934
YIL027C	359	210	298	205	482	83	392	253
YLR459W	529	326	398	254	601	156	553	312
YNL243W	3465	1728	2609	2026	3119	1436	3318	1743
YNR026C	2072	1032	1358	1535	1492	560	1482	1181
YHL044W	84	52	74	47	37	16	50	24
YPR204W	8183.86	3685.6	5345.13	4877.82	6085.38	2735.33	6085.4	3450.9
YNL297C	945	710	688	432	1152	291	933	538
YBR170C	1032	538	758	617	761	295	765	434
YGR149W	443	376	456	233	642	163	598	379
YDR458C	1284	790	958	613	1135	318	1018	532
YKL193C	760	557	728	505	718	242	695	430
YPR099C	15.068	3.009	9.017	10	10.141	7.187	10.052	11.03
YOR135C	0	0	1.004	0	2.003	1.003	1.003	0
YLR310C	2620	1472	1677	1249	2459	698	2121	1161
YNR008W	935	481	750	593	699	267	709	452
YJR150C	12	1	7	10	1	1	3	5
YBR301W	5.426	3.672	8.486	2.725	3.742	1.416	7.634	5.926
YLR003C	1220	653	822	807	1085	292	959	673
YER113C	1087	558	710	559	1109	294	965	537
YHR122W	1016	460	701	693	741	272	698	494
YHL017W	1023	534	728	489	760	263	769	432
YJR010C-A	289	124	180	183	263	79	222	168
YIL085C	1811	817	1177	972	1298	450	1135	724
YMR190C	1001	475	713	524	765	277	709	427
YLR325C	9751	3570	5926	6693	7638	3132	7349	5706
YCL076W	0	0	0	0	0	0	0	0
YOR272W	3563	1571	2037	2105	2248	928	2012	1576
YOR058C	848	486	607	441	586	186	537	307
YER172C-A	0	0	0	0	1	0	2.02	0
YAL064W-B	57	26	45	27	29	21.86	48	24
YDR413C	16.033	3.014	4.013	4.041	4.02	5.037	3.004	5.019
YBR203W	3312	1962	2292	1467	1931	677	1890	865
YAR029W	31	17	21	9	44	11	13	14
YNL238W	2881	1341	1939	1621	2085	841	1838	1327
YJL198W	3845	1795	2303	2185	2419	1066	2224	1758
YOL135C	420	157	281	323	272	119	265	201
YOR323C	2536	1102	1615	1724	2023	861	1986	1355
YLL041C	2707	1305	2345	1533	7444	3274	8085	3926
YKR074W	899	410	818	497	882	270	870	528
YMR274C	182	84	141	90	150	54	165	118
YER026C	789	409	607	413	1733	535	1714	993
YMR201C	613	332	481	410	472	152	492	290
YLR069C	3502	1687	2501	1792	2749	1107	2496	1361
YML042W	531	350	478	273	423	206	463	234
YMR050C	2167.42	990.531	1916.8	1741.34	934.214	774.516	1218.71	963.933
YDR069C	614	389	493	291	580	174	694	336
YOR298W	72	28	29	41	56	18	39	36
YEL066W	1061	491	851	701	857	398	979	576
YPR035W	45497	20467	27136	33971	23359	10324	16973	16778
YDR014W	359	228	254	156	301	85	302	153
YDR227W	1321	824	984	743	1331	450	1110	669
YPR060C	805	362	516	534	705	220	681	430
YMR037C	1585	907	1326	883	1344	440	1264	631
YCR038C	382	189	312	211	250	96	290	157
YNL257C	611	392	504	314	827	204	822	416
YCR072C	3045	1309	1679	1845	2051	884	1649	1255
YBR093C	3593.75	2280.73	4265.57	2527.29	2120.94	1127.58	2527.67	1151.08
YNL092W	160	89	165	90	103	34	132	57
YGR045C	10	5	2	5	24	6	23	6
YAL037C-B	76.067	12.023	9.011	16.02	10.012	29.09	11.014	7.013
YLR134W	297.511	155.27	197.341	169.26	296.416	126.166	210.301	174.227
YOR218C	2	0	1.004	0	0	1	1	1
YMR203W	4374	1900	2882	2670	3329	1402	3068	2002
YKL096C-B	7	1	2	5	2	1	2	1
YPL225W	2234	1040	1991	1506	1972	577	1812	1272
YPL270W	1388	719	1033	770	1402	482	1385	826
YDL012C	554	252	471	419	443	233	521	351
YDR218C	221	125	242	187	159	41	213	180
YLR299W	2416	1192	1658	1475	1424	588	1206	971
YFL003C	134	81	111	108	110	26	120	61
YPL051W	520	253	436	330	372	135	336	222
YNL054W	1375	717	1045	830	1156	420	1278	757
YDR156W	1042	425	713	709	643	344	631	517
YPL062W	1	0	2	1	4	0	2	3
YPR155C	426	257	390	243	609	169	479	245
YOR137C	595	348	506	273	515	138	436	231
YKL123W	213.83	91.068	116.997	106.331	153.619	49.496	122.398	88.671
YKL172W	4801	2048	2870	3102.88	3256	1272	2925	2230
YNL336W	710.513	450.795	673.792	397.713	609.317	221.301	835.795	646.445
YDR305C	325	163	299	175	304	106	276	177
YJL057C	808	420	727	396	585	184	613	347
YPR100W	1339.93	614.991	1113.98	906	1173.86	468.813	1194.95	714.97
YDR358W	533	333	521	271	399	138	395	198
YJL152W	8.011	5.014	6.008	6.011	14.019	5.026	23	42.069
YLR096W	2472	1077	1481	1206	1721	611	1505	940
YDR194W-A	0	0	0	0	0	0	0	0
YKR052C	308	154	207	160	245	96	255	149
YLR427W	1351	654	966	765	1046	448	1072	689
YDL152W	3	3	4	1	2.005	1.019	2.007	2
YGL015C	21	12	19	20	18	11	19	15
YEL064C	378	179	261	168	341	102	304	175
YMR127C	772	361	481	434	574	180	523	393
YIL140W	3207	1581.27	2428.8	1815.9	3073	1289.88	2882.65	1740.72
YOL163W	54	33	55	46	48	21	35	24
YLR197W	8910	4076.97	5162	4654.99	7030.99	2099	5896.99	4295.99
YBR213W	435	172	262	258	329	176	339	234
YAL064W	7	3	6	0	3	0	6	3
YJL204C	460	255	327	211	403	134	357	201
YLR244C	4495	1895	2891	2719	2416	1049	2489	1712
YJR084W	705	300	476	396	406	198	473	315
YLR233C	509	313	382	260	563	139	498	249
YDL238C	294	137	249	155	189	72	178	80
YGL084C	765	441	631	405	837	236	844	479
YLR382C	2376	1239	1667	1334	1686	653	1575	914
YLR154C-H	7	4	1	12	8	0	1	7
YLR154C-G	453.177	188.584	256.084	261.454	142.759	125.598	204.507	163.919
YGR238C	443	260	388	265	502	188	562	249
YDR363W	1010	543	720	591	716	234	643	461
YNL114C	71.093	21.159	18	53.182	16.015	13.229	12.034	29.266
YNL163C	5269	2263	2628	3118	2919	1104	2270	2035
snR55	1	3	3	0	2	0	2	3
snR54	11	15	9	3	20	0	8	4
snR57	5	15	11	5	8	1	9	8
snR56	0	0	0	0	1	0	0	0
YHR009C	2071	904	1421	1444	1601	666	1405	1119
snR50	28	19	27	12	22	9	23	7
snR53	0	0	0	1	0	0	0	0
snR52	0	0	0	2	1	0	0	0
YFR050C	2428	1144	1866	1612	1736	742	1757	1285
snR58	0	0	0	0	0	0	0	0
YLR331C	1	4.056	3.025	4.055	3	0	0	2.012
YNR069C	235	131	252	157	192	72	214	118
YOL058W	2334	1119	1724	1967	4958	2000	4228	2753
YAR019C	636	418	555	338	598	251	614	303
YOR024W	1	1	1	1	1	1	1	1
YML129C	848	311	664	570	509	233	553	335
YGL257C	947	491	633	588	884	245	819	555
YGR020C	2264	1004	1696	1683	1706	669	1634	1316
YOR093C	942	486	643	409	829	255	747	390
YAL046C	484	243	379	405	502	241	587	428
YOR392W	44	18	37	13	14	4	15	6
YAL039C	6586	2991	4392	4870	2741	1312	2939	2399
YGR100W	1476	799	1161	837	1172	367	1111	617
YLR403W	3609	1663	2091	1659	2129	766	1895	1153
YOL118C	15	10	19	12	20	6	23	24
YDR286C	325	172	279	183	200	58	227	163
YHR141C	11185.1	3874.92	6872.62	7231.24	8991.28	3202.5	8301.71	6583.3
YPL128C	1115	536	762	550	850	355	743	468
YJL091C	384	267	271	200	718	138	678	383
YBR191W	11689.9	4238.94	7270.63	8469.59	9437.92	4112.43	9208.38	7262.16
YDR380W	4829	2743	3951	2686	2309	682	2383	1800
YGR191W	5986.99	2753.97	3499.99	3672	3389.97	1352	2852	2436.99
YGR047C	1221	662	835	636	1002	321	934	512
YDR485C	1967	952	1357	1217	1263	502	1126	794
YPL239W	1830	738	1206	1227	1295	556	1256	1009
YPR183W	3270	1439	2251	2387	2906	1481	3474	2683
YOR206W	4742	2583	2891	2347	4448	1183	3407	2233
YEL049W	119.811	56.433	110.178	96.634	71.205	24.358	83.001	57.826
YOR391C	220.149	166.934	303.653	134.783	152.319	49.138	154.317	60.138
YDR525W-A	326	195	230	161	299	80	295	149
YBR089W	1.002	1.006	0	2.004	1.001	0	0	3.006
YLR075W	41924	15208	24383	28665	26197	11519	26938	20681
YBR054W	7153	4481	7369	4332	6377	2128	5525	1894
YLR020C	1226	601	830	656	1163	365	981	607
YNL217W	739	346	549	516	1049	432	1152	816
YLR404W	258	149	182	140	216	64	226	140
YLR154W-A	3	1	0	0	0	1	1.023	0
YIL013C	528	264	427	354	303	99	350	250
YPL206C	1758	947	1443	1093	1281	490	1210	789
YDL060W	5068	2244	2984	3007	3322	1264	3042	2233
YBR293W	996	513	696	588	691	193	659	417
YNR052C	1693.29	766	1119.21	1009.45	1208.3	490.91	1123.71	696.359
YHR032W	2671	1119	1510	1786	1382	687	1427	1015
YEL032W	4268	1648	2074	2119	2180	945	2043	1163
YOL076W	619	339	464	302	730	195	624	347
YDR136C	1	1	0	0	2	0	0	1
YHR203C	19866.5	7528.21	11617.3	13232	15414.4	6736.11	14752.1	11168.2
YJL136W-A	0	0	1	0	0	0	0	0
YML112W	623	282	484	357	437	160	453	260
YLR154W-C	20.12	6.041	16.044	10.054	6.016	5.042	7.008	6.036
YGL241W	669	423	500	353	741	205	608	312
YDL071C	9	3	10	3	9	4	10	3
YPR176C	808	368	603	510	572	237	664	411
tS(UGA)Q2	0	0	0	0	0	0	1	0
YDR057W	1149	558	769	595	902	289	883	633
YJL036W	933	441	684	436	662	244	679	414
YDR521W	0	0	0	0	0	0	0	0
YER009W	2871	1426	1949	1826	2835	799	2584	1854
YLR115W	1353	658	925	659	874	337	921	575
YLR140W	2.351	1	0	1.229	3.585	0	0	1
YGL114W	1536	794	1183	895	1281	523	1272	754
YER167W	3417	1626	2327	1832	2421	984	2227	1513
YMR104C	3111	1815	2769	1701	2655	987	2566	1327
YER185W	72	67	60	71	110	31	64	59
YDL195W	3892	2192	2953	2181	4410	1786	4047	2349
YNL199C	1818	825	1270	1124	1264	570	1521	881
YCR026C	2886	1388	1945	1794	1646	655	1572	1106
YBL052C	868	468	627	459.921	844.835	224.765	764	456
YBR076W	34	34	35	21	27	15	30	26
YNL317W	894	465	651	503	717	315	687	494
YLL019C	3607.74	1715.96	2194.37	1643.99	3159.12	1271.66	2751.1	1593.16
YOR156C	624	298	391	376	358	167	437	279
YHR052W	4923	2317	2913	2727	3497	1017	2772	2236
YKR026C	1332	573	858	790	901	339	939	689
YJR043C	755	323	487	434	611	193	592	359
YJR012C	253	125	195	159	202	73	222	160
YKL060C	132296	53709	93651	104421	90697	43737	86539	58858
YCR044C	593	274	431	335	482	180	448	281
YKL035W	1673	1209	1895	1067	1877	804	1655	772
YLR264C-A	3	1	4	2	3	0	4	0
tQ(UUG)B	1	0	0	0	0	0	0	1
YNL073W	2735	1323	2007	1648	1920	745	2095	1282
YMR280C	724	516	557	347	1280	406	1066	514
tQ(UUG)L	0	0	2	0	2	2	1	0
tQ(UUG)Q	0	0	0	0	0	0	0	0
YFL020C	80.119	38	60	49	53	18	57	31
YNL328C	74	38	75	75	46	32	74	41
YJL014W	4304	1800	2637	2613	3320	1328	2980	2038
YMR031C	1972	1017	1548	842	1948	722	1526	628
YOR174W	687	300	515	463	646	262	673	443
YPR149W	1714	1179	2445	1220	1910	752	2055	822
YNL015W	2574	1438	2498	2189	3902	1725	4597	3401
YCR084C	3948	1935	2723	2342	3309	1466	3199	2047
YHR178W	610	306	484	356	373	159	488	275
YHL050W-A	0	0	0	0	0	0	0	0
YDR260C	391	178	268	284	275	138	311	196
YLR283W	329	197	314	213	278	95	320	173
YPL170W	1660	782	1573	1236	1050	426	1245	834
YPR001W	235	121	221	178	204	95	234	130
YDR204W	449	266	450	344	422	204	417	257
YBR085C-A	2834	1888	3497	2262	1905	686	2134	1254
YDR251W	1843	1096	1385	944	1760	554	1494	879
YNL048W	882	482	630	499	930	299	872	468
YML057C-A	9	2	0	3	6	1.007	3	2
YOR074C	986	363	657	599	825	340.792	816	425
YPL028W	4673	2376	4127	3060	5015	2143	4939	3547
YJR152W	532	262	398	311	367	118	407	240
YKL025C	1062	532	812	535	808	300	744	441
YAR008W	600	229	335	324	573	185	483	288
YOR003W	415	266	390	249	288	96	272	193
YOL097C	2897	1159	2012	2076	2291	919	2319	1616
YOR110W	791	386	533	416	686	221	600	363
YDR407C	1149	727	896	506	1418	369	1143	609
YNR020C	693	261	450	518	534	213	416	329
YBR258C	302	108	238	174	196	67	175	133
YNL146W	24	17	8	4	40	4	25	12
YFR019W	1427	878	1104	759	1214	377	1086	623
YLR262C-A	1908	747	1451	1292	1511	629	1676	1127
YIL115W-A	0	0	0	0	0	0	0	3
YBR223C	590	311	451	352	368	157	350	211
YNL241C	5254	2712	4561	3321	3824	1822	3696	2226
YJL154C	1950	1131	1345	1158	1636	534	1516	868
YDR091C	4751	2473	2942	2472	3973	1202	3619	2378
YJL123C	3075	1304	2172	1978	2240	985	2426	1647
YHR066W	4084.05	1864.59	2312.6	2407.43	2835.59	969.41	2400.82	1797.28
YPL047W	463	169	279	289	275	86	250	200
YER086W	8004	3264	4458	5650	4401	1950	4097	3391
YLR287C-A	9615.97	3548.93	6430.56	6802.09	7321.43	2772.68	6978.06	5402.16
RPR1	3	3	4	3	6	5	3	3
YBR176W	394	223	315	245	356	158	387	224
YDR207C	1152	503	856	769	726	314	832	520
YKL125W	2226	1091	1253	996	1591	521	1237	793
YDR373W	819	439	799	660	743	283	965	587
YGL238W	2032.99	1337	1426	962	2254	484	1761	963
YLR190W	1586	895	1332	1176	1791	712	1618	1038
YNL128W	154	92	117	102	84	47	112	71
YLR312C	1228	609	866	519	749	265	667	370
YKL191W	2720	1195	1702	1775	2090	1000	2109	1408
YNR006W	1661	850	1297	941	1205	462	1227	720
YHR120W	1038	484	698	474	866	256	758	470
YAR050W	593.786	269.046	272.69	207.422	322.467	143.716	213.185	126.124
YOL137W	720	386	512	393	717	170	675	373
YDR530C	618	331	548	443	466	212	575	376
YER111C	847	459	566	371	961	260	817	376
YER144C	2076	1014	1466	1230	1369	537	1267	978
YOL039W	8576.86	3306.9	4992.58	5886.99	6763.05	2816.42	6249.1	4993.02
YIL083C	784	425	587	494	865	281	891	526
YHL011C	6472	2788	3843	4321	3790	1473	3525	2952
YFR010W-A	1.018	0	2	0	0	2	0	0
YGR184C	2528	1464	1660	1128	2149	595	1746	937
YMR303C	1123.2	413.667	529.283	826.599	1664.77	599.262	1013.94	898.605
YDR307W	440	285	365	232	505	99	399	207
YDR411C	767	389	646	534	859	392	1025	829
YBR205W	1158.65	524.031	840.39	741.276	1110.05	389.957	1093.43	751.929
YOR321W	644	324	509	437	788	317	940	640
YMR186W	13109.4	8546.17	13705.4	7392.55	11721.7	4084.32	10560.2	6418.73
YMR278W	1412	720	1172	861	773	278	855	481
YLR136C	72	28	72	62	50	34	56	37
YGL260W	0	0	1	0	0	0	0	0
YMR207C	1003	502	703	522	883	286	722	491
YML015C	960	417	730	651	741	277	696	495
YOR197W	1962	909	1606	1253	1693	782	1620	1124
YKR089C	1533	795	1008	655	1394	546	1242	603
YDL041W	7	1	2.018	3	4	1.03	2	4
YKR072C	3824.46	1716.23	2299.75	2234.24	2728.38	1096.57	2357.07	1671.28
YDL014W	13023	5135	6950	8357	7707	3406	7129	5904
YML040W	0	0	0	0	0	0	0	0
YJL127W-A	1	0	1	0	0	0	1	0
YER079W	369	203	397	272	244	92	263	153
YER024W	1008	606	828	617	925	392	1073	492
YOR230W	9730	5651	8173	6337	4445	2249	5072	3175
YGR234W	11896	5251	7538	5311	30710	11728	27803	15636
YMR178W	826	411	640	494	619	165	551	362
YPR037C	1119	422.996	719	792	624	285	748.994	511
YEL068C	221	106	193	173	186	69	180	136
YNL090W	405	149	344	280.997	463	196	476.988	307.998
YOR307C	1061	577	763	628	839	213	757	480
YMR225C	1167	476	837	771	854	314	746	556
YBR095C	929	447	682	561	893	332	791	581
YDR036C	1794	837	1169	1085	1599	561	1341	807
YGR043C	1512	1023	1865	1246	613	199	655	362
YPL223C	1296	678	1564	1752	107	38	156	171
YPL272C	347	199	247	131	607	162	455	218
YPR002C-A	91.366	66.967	71.841	53.151	75.508	13.443	78.508	47.463
YOL002C	2338	1053	1103	1582	2163	564	1472	1538
Q0032	0	0	0	0	0	0	0	0
YEL032C-A	0	0	0	0	0	0	0	0
YFL005W	2042	1007	1609	1238	1699	612	1585	1034
YCR010C	31	22	27	12	38	11	16	17
YMR152W	882	523	704	461	893	256	700	402
YDR154C	7554.82	3658.31	6162.54	5967.74	4184.64	2160.16	5257.12	4235.76
YMR125W	2307	1454	1569	1093	2744	611	2057	1190
YJR031C	973	554	720	557	859	275	818	464
YCL026C-A	20	8	20	12	31	9	28	34
YCL026C-B	431	310	446	296	463	203	437	245
YGR118W	11022.2	4084.71	6913.83	7800.36	8733.26	3588.96	8646.69	6478.43
YJL055W	2126	989	1657	1564	1633	748	1848	1222
YPR102C	12561.2	4623.76	7017.19	8972.47	9428.81	3890.82	9018.36	7230.84
YNL334C	408.031	230.154	311.701	201.707	380.939	166.855	297.482	207.675
YGL123W	30744.9	11263.8	17273.9	21258	23844.9	9666.83	22899	17708.9
YPL064C	939	436	707	652	594	277	646	428
YPL086C	2077	987	1251	1164	1417	476	1311	857
Q0250	6	2	2	0	6	0	3	4
YPR153W	236	132	178	137	112	37	143	79
YMR042W	461	233	337	347	297	117	348	255
YLL003W	1215	640	890	560	1033	273	872	450
YER042W	483	257	374	297	437	119	325	179
YDR109C	1400	634	947	778	1001	324	888	554
YDR221W	987	461	757	595	667	229	763	397
YLR109W	9692	6537	11009	9834	3545	1786	5685	4479
YKR009C	536	320	413	294	1109	415	816	542
YMR078C	1071	461	682	564	997	342	979	593
YLR094C	1818	865	1312	1057	1578	675	1745	928
YBR037C	666	326	525	412	460	183	496	213
YLR041W	61	35	40	30	42	6	47	20
YJR060W	349	197	340	227	249	100	293	154
YNL161W	1814	994	1469	1130	1732	689	1769	1172
YIL146C	888	494	626	478	653	239	568	381
YLR195C	1515	760	1082	887	1273	396	1112	736
YJL202C	1.006	0	0	1.011	1.008	0	2	1
YAL066W	0	0	0	0	2	0	0	0
YCR081C-A	0	0	0	0	0	0	0	0
YLR231C	867	505	821	635	958	375	966	648.975
YKL016C	2443	1232	1993	1677	5972	2504	6210	3878
YPL111W	1142	511	842	653	1277	539	1151	1004
YKL174C	855	508	595	521	906	304	833	600
YKL121W	915	522	767	422	675	252	705	352
YLR380W	1988	833	1205	1344	1629	710	1600	1056
YOR142W-B	13123.5	6872.7	9567.55	6875.52	10953.9	3151.26	10563	5480.19
YMR012W	6452	3217	3709	3316	8138	2360	6061	3595
YER093C	1262	709	817	598	1061	289	895	551
YOR032W-A	18	5	16	10	7	1	12	9
YDL201W	1660	747	1094	1126	1253	497	1256	933
YDR468C	982	487	706	647	699	303	745	483
snR73	5	4	3	3	4	0	2	1
snR72	5	2	2	0	6	0	1	0
snR71	4	4	2	4	1	1	5	1
snR70	60	35	43	35	24	9	31	21
snR77	11	13	7	2	9	0	7	4
snR76	125	53	75	80	88	26	84	60
snR75	12	3	6	6	6	1	4	7
snR74	5	4	1	1	7	0	4	0
YFR003C	399	200	342	282	357	133	325	209
snR79	0	1	3	1	3	0	1	1
snR78	4	1	2	1	3	0	0	1
YIL033C	3625	1955	2905	2443	2697	1153	2870	1941
YOR368W	455	235	311	221	365	100	405	211
YGR128C	2803	1555	1782	1415	2606	636	2218	1284
YIL048W	1370	810	912	639	1217	324	1124	678
YIL142C-A	1	1.007	5.019	3.022	0	0	1	1.003
YLR337C	1876.99	1063	1513.99	1017.97	1414	628	1319	709.988
YOL056W	480	219	315	301	276	104	326	216
YFR052W	1732	872	1274	976	1348	389	1243	874
YGR088W	554	665	1077	468	671	255	571	269
[truncated: 4,845 more rows]

## Sheet: pam.metafile.gene.readCounts.8h
	I_pam8h	II_pam8h	III_pam8h	IV_pam8h	I_WT8h	II_WT8h	III_WT8h	IV_WT8h
YAL008W	596	520	528	802	894	328	516	482
YBR255W	497	385	323	539	710	282	425	361
YGR164W	4	3	2	5	10	5	3	2
YGR131W	28	28	37	39	38	14	30	34
YNL003C	429	264	242	491	580	274	346	393
YBR135W	573	370	390	754	582	313	384.586	493.467
YBR160W	841	619	685	995	1164	586	679	820
YJL082W	2203	1598	1410	2381	2727	1466	2049	1172
YJL142C	39.182	37.024	50.967	50.174	157.664	45.383	160.608	40.538
YPL191C	192	146	121	208	289	99	166	100
YGL215W	3108	2630	1491	3690	4307	1444	1930	2394
YKL074C	754	533	406	802	838	318	428	575
YJL077C	2	5	1	5	2	0	0	4
YKL096W-A	17535	13359	16255	29755	30741	13879	20040	24703
YIL124W	470	369	392	659	1714	499	961	451
YLR364C-A	0	1	0	0	1	0	0	1
YIL171W	2	0	1	4	0	0	0	0
YPL039W	486	322	313	518	406	199	278	308
YNL170W	9	16	8.275	14.356	34.232	9.12	11	20
YGL141W	629	527	390	721	1019	300	602	380
YJL179W	342	230	249	399	407	177	280	360
YDR316W-A	0	0	0	0	0	0	0	0
YDR316W-B	6000.18	5334.73	1373.34	6049.11	5866.82	1579.87	3929.85	2049.85
YKL083W	3.017	5.012	1.001	7.014	22.066	5.029	3.016	6.046
YBR152W	259	175	103	293	236	125	135	157
YKL029C	5329.99	3358	2488	7039	6096.99	2129	2033.99	3228
YPL166W	155	120	60	159	223	76	135	91
YKL052C	442	293	321.651	549.256	529.875	258.846	279	311.642
YHR025W	1519	902	927	1775	1775	1066	1297	1632
YOL034W	737	482	376	722	881	385	434	503
YBL008W	685	609	376	746	697	339	403	421
YIL062C	1001	651	869	1241	1698	754	1175	1037
YCL023C	0	0	1	0	1	0	1	0
tC(GCA)P1	0	0	1	0	1	2	0	1
YOL116W	284	220	155	327	371	197	310	263
YDR196C	470	291	327	572	761	288	490	381
YNL255C	2719	1524	1527	2911	2465	1444	1422	2634
YNR032W	356	261	227	361	459	228	274	294
YNR045W	462	322	283	544	719	339	469	461
YML105C	723	466	433	866	1004	494	575	689
YNL288W	664	431	370	745	826	404	501	554
YIL059C	212.934	145.903	166	248	217	91.816	111	129
YIL004C	410	252	295	478	521	268	340	402
YNR018W	4037	2118	2215	4610	3494	1843	2084	3159
YPL144W	196	141	169	253	179	110	174	212
YFR047C	816	472	594	926	1246	501	715	686
YER087C-B	843	563	598	1002	941	464	541	829
YHR078W	474	373	297	517	673	209	377	365
YIR023C-A	1	1	0	0	0	1	1	3.163
YJR115W	77	56	52	67	252	49	121	50
YLR355C	9960	6472	6709	13671	12812	5991	6841	9694
YGR099W	410	293	284	485	491	251	322	278
YLR300W	19428	13105	10261	23323	20480	10802	11020	16622
YCL028W	1384	907	862	1677	2124	1024	1298	1263
YJR140C	555	413	289	677	659	229	367	393
YOR033C	735	561	505	773	860	465	484	545
YOR062C	364	223	214	411	294	108	179	155
YBR043C	1172	841	634	1295	1248	570	788	900
YHR112C	1066	702	760	1258	1066	525	720	675
YLR011W	165	93	119	153	194	92	122	121
YIL044C	472	302	319	558	592	255	325	445
YNL197C	1224	1001	568	1340	1766	813	999	968
YKR103W	219	199	134	218	316	79	145	118
YLR133W	408	331	314	443	854	502	699	535
YER121W	69	50	59	94	165	45	93	75
YCR046C	763	471	643	993	857	412	570	618
YNL144C	763	597	434	704	768	402	826	688
YKL204W	1132	778	571	1177	1541	683	869	797
YOR266W	304	223	192	362	458	185	267	310
YDR393W	398	238	234	468	457	234	284	346
YGL171W	1215	829	636	1318	1062	535	541	1078
YPR194C	1234	1082	638	1043	2858	1472	2907	2346
YGR019W	1299	957	1031	1733	2107	748	1286	904
YBL033C	3976	2192	2032	4178	2601	1291	1602	2295
tE(UUC)G3	1.5	1	1	4	5	2	2	1
YJL188C	9.001	4.001	7.003	11.002	68.009	18.007	14.005	38.014
YLL057C	120	74	101	170	89	32	36	39
YPL060C-A	13.735	18.402	4.909	8.338	38.334	13.497	22.53	25.274
YBR296C	129	90	68	126	93	29	45	43
YNL277W	111	98	86	144	173.993	106	85	146
YMR040W	312	249	273	475	359	135	171	238
YDR077W	113583	90440	64631	141813	160892	70790	111158	64063
YMR266W	1918	1572	803	2159	1975	668	800	1304
YKR064W	468	407	314	534	739	256	394	389
YPL089C	3086	2349	1502	3487.67	2715	1329	1402	1506
YGR277C	571	364	433	691	610	318	414	387
YDL139C	303	198	180	278	268	119	142	141
YDR246W	492	367	385	726	656	304	466	438
YOR288C	314	307	243	435	565	209	367	373
YDL240C-A	0	0	0	0	0	0	0	0
YCR028C	627	430	348	638	700	307	415	547
YML054C	475	478	441	516	5986	2097	4705	1570
YLR179C	2585	1341	1363	2526	2341	1526	1548	2043
YOR141C	929	710	436	1023	1125	558	827	778
YPL280W	218.977	144.984	167.069	294.783	334.6	79.406	152.058	53.719
YBL106C	73	70	69	139	191	88	114	121
YGL044C	495	317	323	533	637	280	369	375
YER107C	543	394	379	654	786	374	433	573
YBR038W	656	544	328	588	1474	674	1081	799
YER076W-A	1	3	2	2	9	1	3	1
YGR259C	2.003	3.009	3	7.048	5.041	1.007	3.066	2.005
YEL047C	1227	795	808	1573	1612	885	1091	1101
YPR016C	2215	1474	1177	2484	2363	1144	1191	2030
YOR208W	1337	1332	749	1683	1742	559	808	782
YDL055C	14981	10207	8896	19260	12635	7100	7922	15267
YML009C	426	293	353	514	594	290	351	444
YML072C	1953	1616	1098	2215	4255	1430	2355	1945
YDR142C	369	276	226	409	436	203	291	267
YFL044C	764	466	488	896	830	400	600	513
RDN37-2	20.94	0	0	7.892	0	0	0	0
YEL011W	407	274	294	356	6066	860	2851	213
YKL019W	845	520	569	825	965	473	661	632
YJL130C	4436	3697	2353	4641	4252	1998	2928	3260
YBL085W	1272	991	670	1392	1654	782	1094	991
YBR116C	41.218	35.386	35.055	69.309	391.796	25.318	78.441	13.07
YDR166C	657	622	396	787	933	293	543	510
YHR212W-A	6	5	0	3	4	0	3	7
YDR082W	570	403	359	660	667	261	380	433
YDR348C	1516	959	760	1733	1859	939	1011	1223
YKL182W	4374	3112	2312	4786	10966	6398	8310	8585
YDR445C	0	1.012	1.012	0	2.036	0	1.012	1
YKL018C-A	261	153	172	308	366	154	211	248
YPL027W	13	8	8	10	7	7	3	10
YKL135C	834	707.98	527	930	1472.96	506	859	782.947
YLR363C	117	94	77	136	169	54	79	84
YEL077W-A	9.59	7.07	1.74	0	8.448	0	1.68	10.33
YDR179C	88	98	79	127	152	41	96	95
YML089C	33	25	8	24	48	35	67	57
YLR431C	656	480	360	702	642	235	309	353
YKR046C	2490	2184	2593	3489	4929	2358	3223	2960
YJR005W	845	702	474	940	1311	508	830	778
YJL116C	8948	5016	3421	9232	1724	718	779	1207
YMR030W	247	192	173	300	523	214	348	219
YER030W	828	466	687	889	1060	480	787	784
YIR026C	1303	773	628	1485	852	454	430	863
YJR072C	1610	895	976	1848	1360	860	849	1208
YDR515W	372	313	223	475	669	314	379	442
YKR039W	298	233	145	385	507	157	170	174
YGL003C	583	453	351	581	922	392	485	474
YPL009C	1178	848	698	1517.16	1403	687	723.605	1101.16
YDR268W	393	317	274	492	519	253	307	342
YGL192W	5	3	5	7	2	4	11	8
YDL117W	1158	908	534	1209	1461	678	778	1006
YMR131C	4685	2979	2267	5203	3950	1901	1869	3306
YMR293C	390	360	242	457	547	204	351	280
YJL214W	77	56	52	51	68	43	48	47
YIL105C	485.279	391	309	520	1280.55	395	717	462
YML126C	1665	1494	1463	2235	3326	1844	2355	2532
YLR189C	988	692	570	981	1439	516	911	616
YIL150C	339	237	146	387	308	171	196	265
YLR349W	41.241	46	36	62	29	25	26	40
YGL250W	108	128	115	161	243	116	164	123
YBR212W	1330	1058	641	1525	1684	614	1101	851
YJR109C	1289	999	704	1332	1494	636	830	963
YLR254C	442	279	288	486	466	208	285	337
YGR085C	7360.41	3968.06	4300.33	7692.68	8387.48	4862.4	5228.57	7880.7
YPL105C	2445	1607	1169	2587	2797	1329	1563	1857
YGR145W	1709	1251	891	1775	1547	771	683	1422
YJR094C	94	119	69	115	201	47	97	73
YKL177W	31	25	13	28	13	8	15	21
YGL154C	221	152	161	248	246	105	160	190
tK(UUU)Q	0	0	0	0	0	0	0	0
YBR129C	242	159	140	279	384	136	226	241
tK(UUU)D	14	14	9	16	15	9	7	6
YMR322C	13.474	33.607	29.451	39.304	5.753	2.088	11.613	0
YKL099C	733	486	458	843	711	312	322	618
YDR315C	124	123	104	195	186	71	107	115
YLR394W	415	320	244	526	930	414	572	533
YNL104C	3743.42	2548	2033	4299	6169.62	2802	3426.8	4010.76
YNL151C	625	401	351	724	643	315	385	595
YNR066C	523	382	161	482	560	174	253	169
YLR220W	810	546	570	843	1520	723	928	755
YHR006W	1739	1289	998	1923	1950	1016	1114	1207
YMR232W	62	76	58	87	88	25	51	36
YNL083W	442	320	273	497	619	284	353	394
YGR038C-A	0	228.709	0	53.154	0	135.076	0	0
YGR038C-B	5664.37	3402.68	2155.89	4259.38	3323.71	1636.03	2390.44	2746.3
YMR238W	2567	1862	1425	3056	2805	1232	1516	1881
YER168C	711	521	409	800	946	438	544	604
YPL265W	1237	1117	495	983	341	91	249	381
YOR227W	1214	1029	719	1250	2669	835	1500	702
YOR081C	732	574	467	965	1006	466	739	551
YEL026W	4032	2572	2344	5026	2998	1668	1763	3289
YGR050C	17	9	8	23	28	17	19	25
YDR021W	396	335	212	486	435	163	159	321
YGL063W	160	89	86	128	172	99	100	149
YPL212C	2366	1512	983	2595	1987	848	833	1437
YOL157C	188.347	175.234	170.611	257.41	190.776	120.169	115.199	144.134
YOR345C	1	1	0	1	3.061	0	2	0
YPR095C	629	470	299	674	1103	400	583	494
YOR310C	5165.33	3677.13	2430.31	6125.59	4720.09	2327.09	2417.78	4445.69
YDR188W	3620.99	2183	1943	3803	4034	1923	2349	2965
YOL128C	301	238	210	349	277	156	150	215
YGL236C	848	547.988	476	1040.99	842	461	505	641
YHR133C	514	360	325	671	611	258	323	522
YDR017C	1321	967	612	1362	1579	620	822	1006
YIL090W	993	759	554	1188	1291	447	680	875
YBR183W	271	254	286	343	646	233	444	203
YOL048C	156	131	113	183	454	135	324	213
YML039W	0	51.849	0	0	21.995	18.995	0	0
YCR007C	231	171	147	276	182	65	107	116
YDR540C	180	138	104	189	126	52	75	111
YEL004W	171	189	115	195	279	64	160	132
YPR057W	392	235	274	429	476	238	287	296
YLL032C	278	290	172	339	448	179	230	269
YDR116C	979	648	610	1106	1211	560	797	803
YPL119C-A	8	27	8	20	64	7	31	18
YDR299W	1549	1219	859	1808	2066	826	854	1364
YLR030W	219	128	137	231	197	83	122	102
YDR122W	1262	893	756	1315	2380	849	1426	754
YOL062C	1312	860	803	1477	1627	764	1017	1100
YNL234W	575	400	271	700	507	134	184	226
YLR467W	3288.05	1864.7	1565.03	2683.65	2528.19	1730.99	1853.21	1570.4
YJL194W	396	263	246	338	892.972	335	322	292.996
YOL015W	152	111	87	152	159	54	79	97
YDL070W	2704	2365	1744	3165	3725	1140	2188	2070
YOR241W	768	547	501	829	947	426	505	618
YLR056W	5894	3758	4953	9342	4344	3818	4114	6748
YPR039W	0	0	1	0	3	0	0	0
YMR054W	1352	1054	713	1483	1843	740	1089	952
YKL110C	1383	892	748	1558	1108	535	596	891
YML100W-A	6	1	4	3	6	1	4	1
YPR070W	525	415	307	558	794	274	326	381
YLR204W	660	438	555	917	743	369	486	625
YML097C	785	572	431	904	823	385	432	569
YKR007W	264	177	217	321	317	204	273	346
YDL096C	0	0	0	1	2	0	0	1
YHR193C	4336	2247	2835	4765	6038	3333	3715	5155
YBL099W	3166	2235	2226	3610	19226	8561	12258	11872
YJR035W	579	427	302	582	833	307	457	351
YOR126C	490	365	350	550	626	334	364	450
YMR023C	334	301	273	454	403	190	271	265
YOR119C	1667	1190	842	1907	1789	756	1071	1298
YNL196C	8	10	7	21	4	2	7	7
YNL187W	597	374	281	752	363	163	215	267
YMR141C	6	8	2	5	31	10	6	11
YLL014W	384	283	358	493	687	290	463	529
YBL062W	0	1.008	0	0	0	0	0	2.027
YCR061W	350	301	212	358	545	187	478	210
YOR199W	0	0	0	0	0	1	0	1
YPR115W	970	676	506	952	1984	708	1127	686
YHR088W	1225	909	714	1461	1096	563	525	1130
YBR017C	1222	886	638	1309	1248	604	813	886
YPR162C	348	318	259	392	477	200	259	320
YGR166W	973	890	708	1189	1107	464	552	613
YDL161W	1039	625	604	1062	1094	606	794	719
YKL050C	373	238	164	325	528	144	226	135
YJR055W	196	131	83	182	175	70	66	135
YGL099W	1223	928	688	1332	1458	691	689	1118
YFL030W	533	365	402	634	3378	1082	1754	1589
YIL119C	176	207	110	157	346	72	169	60
YPL193W	875	607	478	951	853	384	467	644
YNL005C	1411	1009	887	1527	1870	851	1103	1259
YGL217C	0	0	0	0	0	0	0	0
YJL144W	177	140	174	268	170	51	107	80
YBR012W-B	45.322	9.487	0	22.052	42.154	0	46.172	10.371
YLR379W	1	0	0	1.004	3.015	3.01	0	0
YJR139C	2024	1471	1363	2158	3403	1505	2050	2470
YBR133C	664	472	478	830	918	473	582	644
YBR162C	2876	2042	2278	4305	6758	3140	4204	5745
YNL331C	353.868	258.464	235.781	402.722	305.666	133.411	219.334	236.637
YJL079C	4126	2302	2274	4403	4729	1854	2455	2444
YGL019W	1015	630	687	1106	1185	634	716	805
YGR201C	447	371	459	866	548	165	272	276
YNL172W	540	456	270	589	661	306.919	405	451
YNL058C	1025.98	787.948	763	1168.94	1190.95	582.873	861.918	902.947
YPL160W	2991	2278	1419	3186	3087	1634	1775	2628
YOL083C-A	0	0	0	0	0	0	1	1.36
YNL023C	1353	912	697	1399	903	503	533	905
YDR214W	2372	1685	2243	2869	2069	987	1509	1267
YLR222C	2132	1518	1029	2232	2240	998	997	1730
YLR295C	1007	642	749	1116	4262	2030	2603	2822
YER175W-A	2	1	3	3	2	1	4	1
YHR168W	385	290	219	400	527	246	266	267
YOR064C	277	177	214	297	585	285	416	428
YOR159C	304	157	250	344	300	145	213	282
YOL081W	925	845	539	949	1573	458	672	635
YOL036W	2147	1518.93	1072.97	2197.97	2151.95	1038	1216.98	1276.95
YGL148W	2429	1413	1386	2792	2693	1703	1794	2703
YOR031W	445	298	381	604	512	138	223	132
YBR282W	575	416	438	673	600	290	357	467
YDR194C	2142	1705	1178	2506	2608	1126	1467	1859
YOL114C	52	34	37	54	57	33	29	41
YGR084C	807	677	536	1061	1205	529	768	845
YNR030W	626	544	416	790	1063	391	629	509
YAL037C-A	0	0	2	2	0	0	2	1
YML007C-A	8	4	10	7	11	4	9	1
YBR018C	44564	34503	29090	48733	62383	26416	47291	39207
YKL076C	100.995	68.574	74.83	152.888	128.974	63.615	83.272	115.447
YDR466W	1137	887	528	1159	1525	552.537	862	682
YFR045W	338	235	243	394	579	191	335	243
YIL002C	711	544	394	742	920	385	528	501
YGR159C	23525	14498	10761	26666	15166.9	6860.97	6329.99	13914.9
YLR369W	715	511	402	763	959	444	623	513
YFR032C	41	42	22	42	196	79	61	32
YNL118C	1195	968	714	1303	1909	729	1160	978
YGL228W	1342	889	880	1316	1890	822	1263	1122
YJR117W	1170	1094	810	1342	1930	787	1249	1010
YBR196C-A	10	7	6	9	9	2	6	3
YBR196C-B	5	4	3	3	16	4	7	8
YIL030W-A	50.021	31.952	33.082	52.613	59.078	30.877	36.522	46.447
YLR357W	1015.97	699	572	1053	1387	623	797	780.989
YER127W	1540	901	882	1700	1426	713	610	1087
YBL015W	608	412	370	617	6007	2193	3817	1975
YLR017W	1572	1037	855	1932	1225	631	698	1034
YHR110W	835	576	658	984	1078	584	709	724
YBR041W	661	540	426	754	1192	423	674	614
YOR394W	11	13.434	3.346	8.104	21.239	3	10.114	6.425
YCL068C	0	0	0	0	0	0	1.77	0
YDL220C	418	308	186	429	429	233	260	262
YDL039C	4267	2997	1086	4299	4089	1273	542	2261
YKL202W	10	10	4	15.089	7	5	4	12
YGR122C-A	5.825	2.927	2.971	2.788	6.236	0	3.107	8.051
YOR264W	761.996	512	333	908.994	1003	451	647	1254.99
YNL042W-B	4	6	2.155	2.169	2.193	3.214	5.437	6.687
YBL029C-A	359	233	245	464	690	206	398	330
YOR008W-B	26	14	10	21	35	13	19	10
YOR366W	20	9	11	23	35	10	18	15
YNL275W	360	261	204	357	527	169	211	239
YAR015W	695	412	359	1076	2335	436	595	647
YOR384W	7	5	0	9	13	4	3	6
YLL051C	1037	783	486	1253	1070	415	610	592
YDR427W	734	640	450	867	1393	412	697	703
YLR079W	1065	683	730	1300	1418	682	931	1189
YLR408C	99	59	75	106	192	67	97	78
YMR093W	1724	1242	832	1818	2077	894	916	1326
YBR221W-A	0	0	0	1	0	0	0	0
YDR079W	301	241	229	362	399	158	216	285
YMR268C	352	253	195	312	440	184	175	225
YOR169C	0	0	0	0	0	0	0	0
YML070W	1317	1051	975	1582	2216	817	1316	978
YHR175W-A	12	23	4	24	34	9	14	19
YPR072W	937	680	504	961	1226	554	686	715
YMR108W	6476	4095	3382	7954	6193	3332	3684	5914
YCR091W	322	240	174	343	630	165	455	146
YER062C	8298	4713	4323	10869	4415	1643	2303	2604
YDR244W	746	561	418	804	916	485	606	632
YER189W	174.742	125.297	63.975	147.023	79.178	62.357	121.737	66.856
YJL009W	2	0	0	0	2	1.011	0	0
YDL137W	3598.35	2294.45	2299.45	3994.85	4282.46	1994.86	2812.96	3301.53
YGR271W	664	479	337	681	901	363	478	429
YDR233C	5395	4059	3239	7178	8302	3387	4815	6046
YGR071C	336	372	190	404	625	144	279	238
YCR106W	77	57	28	75	112	46	71	93
YBL100C	1	0	1	0	3.005	1.004	2.014	3
YER109C	604	400	331	609	671	331	411	419
YDR489W	515	332	206	518	497	197	217	279
YPR049C	732	585	455	851	854	344	512	461
YDL057W	326	218	260	408	346	125	192	189
YPR014C	0	0	0	1	1	1	0	0
YGR257C	878	557	506	990	853	452	511	679
YEL045C	8	8	8	11	12	7	7	12
YPL235W	1236	904	739	1302	1658	742	890	1129
YLR122C	45.283	34.108	29.053	22.732	42.198	17.434	20.113	25.65
YLR155C	0	0	0	0	0	0	0	1
YBL087C	4027.64	2085.19	2608.47	4335.67	4475.76	2738.27	2817.76	4583.82
YJL132W	566	426	328	552	1018	356	584	247
YGL190C	760	702	409	874	1557	470	698	586
YBR110W	525	435	308	605	1043	357	605	581
YDR144C	460	278	309	530	779	395	549	702
YFL046W	375	249	266	450	502	256	332	395
YOR103C	254	276	174	286	503.959	116	231.993	268
YKL137W	532	326	424	607	795	264	478	492
YDR447C	5016.88	2653.12	3361.09	5393.16	7437.4	3691.84	4920.18	7199.38
YGL009C	1307	974	956	1502	2557	1191	2124	2404
YNL324W	1	0	0	0	0	1	0	0
YPR145W	2899.64	1673.16	1599.74	3305.58	4466.01	2664.54	2893.26	3943.06
YJL063C	895	536	633	1039	1178	641	771	861
YMR149W	933	632	601	983	1401	608	853	979
YPL021W	0	0	1	0	1	1	0	0
YIR010W	564	410	368	659	708	329	467	475
YDR331W	589	427	363	618	867	356	484	543
YJL114W	5.9	10.166	2.811	4.534	3.053	2.63	7.741	5.422
YKR044W	803	543	445	1016	754	388	388	679
YLR433C	481	340	309	499	555	272	341	447
YMR068W	291	239	217	381	415	172	241	194
YLR157C-B	54.961	97.034	0	19.848	124.967	0	90.205	18.842
YNL164C	493	334	288	497	578	259	342	404
YER032W	458	346	272	571	795	417	577	533
YJR070C	3399	1922	1739	4025	2288	1395	1395	2930
YGL005C	1103	821	637	1069	1008	376	632	616
YHR043C	1466.03	1088.43	1063.8	1558.76	2072.43	1009.09	1250.37	1253.49
YDL111C	1280	864	712	1403	1290	587	676	962
YMR133W	3	8	11	20	18	5	9	6
YPL007C	242	206	161	296	509	195	286	264
YKL159C	191	197	191	285	237	88	136	160
YDR507C	1259	909	746	1456	1816	1044	898	1344
YKR075W-A	0	0	0	0	6.172	1.019	0	0
YLR138W	2161	1657	1243	2260	2375	1055	1436	1602
YBR101C	864	615	591	1049	1048	488	647	755
YLR396C	411	360	223	431	581	210	337	300
YBR245C	1060	760	536	1032	1160	592	634	763
YJL216C	298	169	121	231	142	60	67	119
YBR210W	148	116	118	172	295	117	172	174
YPL103C	494	345	305	517	500	241	352	401
YIL103W	635	435	355	738	533	300	288	560
YIL152W	262	186	158	395	353	111	191	205
YML045W-A	0	0	0	0	0	0	0	0
YJR096W	609	466	522	776	1794	442	780	474
YAL010C	207	204	160	286	355	130	227	252
YGR143W	1562	1132	739	1560	2582	754	1182	857
YGR112W	551	404	377	623	796	343	515	437
YLR256W	1908	1888	1049	2141	2486	704	1210	1067
YHR174W	42494.8	23289.3	27971.4	45457.3	33201.4	20765.3	23707.3	31388.4
YOR012W	113.154	71.059	79.873	183.009	75.321	24.086	37.453	33.559
YIR001C	536	362	302	601	800	341	460	475
YDL213C	1487	835	884	1707	1186	647	662	1198
YDR442W	1	0	1	2	0	1	1	0
YDR317W	143	116	77	161	94	43	28	74
YDR478W	170	92	106	194	140	92	102	160
YKL097C	7	1	2	2	2	0	4	4
YOL164W-A	1	0	0	0	0	1	0	0
YNL106C	650	469	332	653	818	313	468	411
YOR378W	11	18.07	7	17	46	21	23	22
YFR015C	428	345	293	455	2115	415	1081	234
YMR230W	4584.62	2619.85	2995.92	4989.61	6024.72	3034.48	3669.54	5362.9
YIL092W	386	298	233	479	343	173	240	272
YAR009C	14221.2	9564.73	7277.25	11213.3	13203.7	5678.52	8108.51	7791.11
YLR321C	559	401	300	613	710.925	318	373.976	463
YBR004C	587	666	442	904	778	224	286	494
YGR052W	127	106	89	126	237	58	185	43
YJR161C	800.553	626.191	406.724	977.087	858.492	299.631	511.166	432.492
YOR278W	224	145	178	254	316	143	175	239
YNL085W	1111	1054	614	1216	1983	639	996	950
YGL061C	135	92	102	167	198	97	147	151
YPL210C	1287	1025	706	1373	2033	785	1061	1243
tS(AGA)G	8	9	1	7	6	1	3	8
YOR087W	386	285	236	385	779	345	486	405
YGL234W	2700	1714	1298	3653	5287	1529	1761	2063
YOR347C	932	612	459	1068	763	302	496	332
YPR093C	300	190	223	373	275	115	190	194
YAL029C	2120	1594	849	2190	2299	886	913	1350
YOL155C	259.905	280.604	344.357	370.84	1209.43	318.716	1090.29	317.199
YDR421W	507	376	300	560	741	286	479	424
YGR186W	1519	978	817	1468	1865	821	1186	1086
YDR294C	972	702	713	1164	1526	670	996	905
YHR135C	1655	1046	940	1802.78	1996	1013	1369	1423
YDR015C	0	0	0	1	1	0	0	1
YBR181C	9578.83	4941.1	5369.93	10030.6	11464.7	6485.4	6890.4	10803.7
YOR078W	1247	911	738	1408	1261	526	549	1064
YOR243C	1905	1215	907	1945	1607	734	756	1225
YMR165C	778	510	405	824	965	466	609	492
YCR005C	2838	2376	631	1447	933	368	523	485
YLR163W-A	0	0	0	0	0	0	0	0
YPR055W	403	409	218	426	578	188	357	294
YIL016W	221	133	151	278	302	193	221	273
YLR032W	787	600	430	871	831	477	462	601
YDR114C	1	0	3	3	3	1	0	1
YLL030C	0	0	0	0	0	0	0	0
YDL185C-A	0	0	0	0	0	0	1	0
YLL065W	1	0	0	0	0	0	0	0
YPR046W	100	69	95	110	102	63	97	96
YBR099C	0	5.19	0	5	8.385	1	2	8
YBL027W	9123.42	4931.59	5536.11	10004.3	11238.7	6372.11	7154.21	10733.4
YOL060C	1638	1082	911	1777	2665	1081	1702	1163
YIR018C-A	1	2	0	1	4	1	3	0
YOR382W	297	243	190	880	381	182	265	155
YNL232W	1158	636	628	1192	1066	462	519	844
YDL076C	438	327	266	618	582	236	351	412
YOR225W	0	0	0	1	0	0	0	3
YDR120C	1592	1058	849	1813	1430	771	751	1523
YLR465C	24	12	9	16	40.519	6.181	22	20
YJL192C	657	495	462	737	1052	482	684	735
YEL020C-B	0	2.005	0	0	4.014	1.01	1.003	9.02
YLR054C	118	86	97	158	109	39	50	71
YLR009W	3115	1845	1629	3393	2516	1356	1247	2290
YKL116C	546	439	305	616	781	379	443	480
YBR209W	4	1	1	1	2	1	3	1
YOR292C	156	123	130	181	376	125	286	138
YLR423C	315	263	193	382	433	133	233	264
YDR278C	1	0	2	1	0	0	0	0
YLR105C	669	426	405	671	542	246	353	374
YML091C	1131	998	619	1359	4715	2142	3090	3464
YHR191C	143	84	120	132	153	93	103	111
YDL098C	197	142	124	202	172	74	119	102
YLR202C	43	45.469	49.006	76.002	91.764	31.452	51.685	46.978
YLR299C-A	0	0	0	0	0	0	0	0
YKR005C	278	199	193	267	258	122	138	135
YMR143W	5175.99	2972.93	3456.45	5813.83	7927.34	4158.29	4944.71	7018.92
YCR063W	147	102	63.829	185	121	48	63	93
YNL189W	2724	1959	1344	2929	3311	1369	1828	2062
YFR024C-A	1201	753	808	1316	1666	805	1071	945
YCL047C	201	189	190	301	280	119	177	178
YGL122C	1911	1392	969	2213	2448	1114	1386	1715
YDL018C	256	164	195	292	404	199	268	245
YOR120W	4180	2954.94	3510.97	5313.94	16360.9	5170.98	10357	4989.92
YPR160W	1988	2304	1964.95	2481	25326	3436	10030	1324
YBL060W	734	573	403	716	683	324	379	523
YDR065W	237	226	126	289	283	107	157	172
YBR019C	98765	71836	57634	100973	128400	57421	87669	69606
YKL056C	11844	6173	8123	12627	13560	6494	8703	12786
YKL065W-A	122	81	145	299	161	27	59	31
YGR160W	16.029	6.016	5.012	10.018	45.102	11.028	4.01	43.108
YDL163W	0	0	0	0	0	0	0	0
YPL068C	376	274	209	394	458	195	239	231
YJR057W	419	269	277	457	355	212	275	328
YGL211W	1033	663	652	1171	927	469	555	668
YFL032W	11	6	7	14	9	6	6	2
YPL195W	877	738	547	833	1261	460	834	717
YCL044C	700	533	409	828	806	371	546	500
YAL059W	826.997	449.986	548.987	1050	584	316.988	303.996	732
YNL007C	1186	793	969	1285	1558	507	920	452
YPL148C	319	230	258	402	269	127	200	233
YJR137C	725	563	384	718	1243	716	852	690
YMR021C	369	242	201	394	479	220	298	263
YMR074C	656	440	539	725	879	399	546	610
YGR203W	227	118	137	288	231	116	149	183
YJR039W	256	227	169	297	603	171	318	173
YDL158C	16	14	13	28	36	17	17	28
YOR104W	500.689	342.533	300.779	613.564	626.109	251.1	336.408	380.413
YFL009W	944.868	709.189	587.136	1044.47	1206.4	558.223	787.301	761.434
YLR297W	579	387	325	949	409	144	334	249
YLR279W	0	1	0	0	3	2	0	1
YDR216W	2367	2165	961	2161	3095	1085	2239	1578
YIL120W	268	207	183	362	351	117	192	199
YBR030W	553	366	319	624	685	390	407	577
YPL162C	328	253	202	381	478	241	322	323
YGR095C	883	585	570	1132	767	369	439	681
YCL027W	120	67	57	83	113	67	63	94
snR3	0	0	0	0	1	0	0	0
snR5	42	25	23	35	42	14	25	35
snR4	168	95	110	156	98	52	95	122
snR6	1	0	2	0	1	0	1	1
snR9	44	24	38	42	41	9	23	32
snR8	15	6	15	16	23	3	11	12
YHR029C	178	141	115	213	199	94	106	156
YIR021W-A	0	1	0	4	2	0	1	2
YAL033W	307	144	199	292	318	159	240	361
YNL130C	415	344	401	579	1270	580	994	900
YNR036C	996	680	900	1281	1751	721	929	1011
YNR049C	410	250	289	455	463	256	261	320
YDR192C	381	289	243	438	394	195	306	335
YOL112W	1074	772	726	1246	1369	812	916	1057
YML109W	791	483	498	819	956	576	529	663
YOL083W	597	534	450	808	885	239	466	267.64
YNL251C	1536	904	582	1379	2518	831	1147	860
YBR266C	2.008	2	0	1.004	5.037	3.023	0	3.007
YBL004W	1124	886	554	1294	836	455	581	1158
YER145C-A	24	18	14	34	17.014	12.018	5.005	9.014
YBR164C	396	286	302	446	702	262	408	447
YHR074W	1091	765	665	1048	1589	645	986	789
YDR464W	1891	1369	844	1913	1754	706	739	1064
YFR030W	1093	782	570	1099	1130	695	903	851
YJL146W	307	283	226	362	631	256	349	360
YKL078W	994	648	466	1025	829	382	231	737
YIL055C	489	364	250	543	549	159	323	234
YPL053C	1150	857	729	1331	1800	834	1064	1212
YLR351C	847	526	668	1018	1241	680	841	928
YEL009C-A	12	17	9	16	8	3	3	11
YJR111C	527	367	277	560	584	244	247	372
YIL030C	1415	1081	616	1517	1861	670	993	1119
YER125W	1694	1300	844	1692	2708	1090	1614	1339
YER152C	827	499.98	612	964.94	1114.99	537	652	969.989
YLR015W	579	365	352	600	563	282	282	391
YHR116W	331	226	208	381	274	173	203	274
YPL259C	472	413	317	518	850	343	534	485
YOL100W	1018	833.977	596	1123.97	1252.96	540.969	941	701.975
YOR039W	702	559	496	850	1100	510	689	682
YDL037C	1447	1131	267	1594	1722	429	216	695
YLR334C	2.003	1	3	1	3	0	0	2
YHL043W	1	1	1	0	1	1	0	2
YOR364W	3	5	2	3	11	2	7	8.927
YOR386W	220	188	153	226	632	164	379	127
YAR042W	2618	1735	1171	3109	2456	1103	1526	1791
YPR198W	578	554.984	353	732	736	215	319	389
YHL038C	328	287	222	363	549	235	328	319
YLL053C	112	81	64.535	82	213.635	136.558	104.527	162
YDR425W	257	304	178	335	570	158	307	207
YOR331C	3.007	1.002	2.006	0	24.106	4.02	2.009	5.016
YML076C	516	492	323	577	642	309	443	411
YKR060W	326	230	212	415	315	152	146	337
YHR094C	13.38	15.27	9.26	29.595	8.223	5.143	2.03	5.089
YER069W	2899	2154	1487	3440	4418	1936	2145.99	2253
YMR091C	653	472	364	684	847	437	511	556
YER012W	984	775	696	1187	1748	729	966	1066
YHR098C	1672	1276	911	1727	2293	955	1416	1477
YDL135C	649	416	447	711	878	420	545	601
YCR093W	1232	1135	608	1278	2301	765	1248	1063
tP(UGG)O3	0	0	0	0	0	0	0	0
YGR273C	25	20	12	23	2	0	1	6
YGL080W	294	275	179	398	653	216	374	382
YBR069C	6642	4311	2767	7028	6100	2437	2366	4671
YGR077C	723	562	394	915	1229	404	607	560
YCR104W	1.5	1.783	3.586	1.003	3.988	3	2	4.617
YDR040C	1786.65	1289.52	1147.77	1641.58	1171.91	707.41	913.199	1261.95
YPR012W	3	1	2	3	13	4	9	11
YGR255C	1514	1083	760	1761	1727	557	870	782
tM(CAU)M	3	0	1	0	0	0	0	1
YDL051W	2131	1360.99	1284.99	2436.99	2127	1027.93	1277.99	2242.99
YBL102W	292	208	242	372	681	264	402	348
tM(CAU)P	4	3	2	10	4	1	7	5
YPL237W	3288	2134	1816	3909	3255.97	1591.99	1765.99	2822.99
YLR120C	1627	1327	1014	2013	3068	1185	1696	1173
YCL001W-B	12	13	10	12	10	4	9	3
YCL001W-A	5	6	5	10	8	0	2	6
YNL068C	915	736	498	1107	1238	555	633	844
YJL169W	2	4	0	2	2	0	2	3
YBL002W	836.25	641	1026	1684.6	1912.23	863	1353.24	1681
YDR146C	581	425	386	629	1270	634	880	892
YBR112C	1943.79	1476.68	989.182	2110.97	2475.96	1136.79	1567.8	1350.61
YBL081W	1164.27	820.766	543.644	1261.53	1132.53	492	602	812.397
YFL040W	4	8	6	6	14	4	6	3
YNL326C	434	310	285	498	477	208	272	329
YDR337W	684	515	532	900	950	474	572	740
YJL061W	660	571	417	724	892	336	535	568
YPR147C	425	330	291	482	643	271	412	341
YKL131W	3	5	3	7	6	0	0	3.11
YDR441C	1109	702	671	1346	956	512	493	745
YPL094C	2167	1403	1225	2329	2097	998	1253	1717
YOR101W	1754	1036	755	1930	1297	563	572	1265
YER020W	827	572	590	1050	1318	517	855	633
YDR231C	392	219.992	262	447	1021	431	617	487.982
YJL112W	642	466	445	776	1592	641	975	813
YFL066C	302.678	262.726	54.925	264.973	311.625	108.035	203.672	87.264
YNL193W	327	272	217	357	696	152	281	200
YML058W	1095	865	944	1580	1935	971	1304	1677
YBR188C	263	157	189	269	305	145	168	200
YLR435W	575	344	371	661	526	230	242	450
YJR076C	1089	803	896	1444	1726	878	1094	1234
YKL157W	2032	1603	1368	2292	3781	1499	2300	1779
YBR003W	741	610	457	811	1350	500	805	575
YPR129W	960.992	693	649	1141.99	1292.93	604.996	879	961
YDL113C	658	484	344	672	1003	407	639	399
YMR135C	723	550	496	932	1571	423	813	565
YGL007W	7	3	3	10	6	5	6	6
YPL005W	304	252	213	334	421	164	280	224
YBR247C	1900	1280	937	2127	1687	827	714	1453
YLR185W	3943.61	2038.47	2562.74	4177.04	4762.76	2711.12	2889.61	4498.98
YJL210W	451	302	309	511.996	654.997	216.992	414	255
YLR398C	1104	803	504	1085	1471	603	806	732
YIL154C	760	442	558	845	894	397	499	476
YIL101C	717	538	445	991	1511	417	975	299
tT(CGU)K	0	0	0	0	2	1	0	0
YKL004W	1375	986	825	1646	1595	632	852	1260
YPL154C	4536	3384	3962	6587	8423	3224	4753	3577
YPL101W	730	499	424	749	992	466	506	677
YLR258W	905	816	611	1005	4043	784	2033	679
YBR178W	5	0	1	0	2	1	3	2
YJR098C	183	135	134	200	247	108	150	156
YHR176W	323	226	213	363	350	179	197	193
YJR018W	5.012	5.019	3.058	5	11.078	1.002	4.04	8.027
YMR326C	0	0	1	0	0	0	0	1
YDL244W	185.769	132.227	101.382	220.28	77.442	48.46	49.774	68.771
YDR319C	144	154	138	224	242	76	152	117
YKL095W	521	357	226	552	389	213	275	258
YOL099C	2	1.023	0	3.025	2.041	2.031	0	2.025
YIL094C	3224	1815	1620	4318	1508	1081	1363	3077
YLR451W	953	730	487	1024	1095	494	641	709
YFR017C	462	369	464	585	1963	468	1166	315
YLR342W-A	3	2	1	3	5	0	0	2
YIL076W	1644	1290	1098	2145	2114	898	1234	1407
YNR077C	0	1	1	0	3.729	0	1	1
YOL044W	257	274	211	299	410	169	267	265
YLR323C	388	224	238	437	334	146	193	239
YOR085W	921	604	603	1122	1353	558	805	861
YGR054W	4122	2980	1742	4306	4237	1898	1986	2661
YOR050C	1	0	2	1	4	5	1	1
YNL087W	1213	880	633	1200	1422	623	691	1165
YGR114C	0	0	0	0	0	0	0	0
YLR318W	309	254	178	380	325	100	139	186
YBR278W	328.975	230	297	427	303	133	209	232
YNL024C-A	398	279	283	478	455	166	232	320
YDR296W	1164	740	813	1278	1387	717	841	952
YGL232W	365	321	253	421	512	194	296	315
YPR091C	733	579	437	689	1689	475	965	613
YGR141W	564	373	441	691	830	324	508	387
YAR030C	11	11	8	17	16	8	12	9
YGL111W	1557	928	895	1517	1367	709	815	1337
YJR158W	0	0	0	0	0	0	0	0
YHR137W	925	680	757	1213	716	273	474	730.998
YFL011W	96	62	63	125	64	23	57	47
YMR198W	251	179	176	245	260	143	238	210
YCR003W	559	331	445	640	745	317	494	518
YMR316C-B	117	51	64	94	76	53	49	41
YMR316C-A	5	2.027	1.01	2.017	8.093	3.082	5	5
YDR342C	17898.9	10756.8	8326.04	13665.8	23255	8980.35	17616.8	11897
YMR163C	217	171	133	262	337	154	201	196
YGR294W	9.026	3.618	5.407	9.855	11.414	9.421	2.284	9.226
YEL008W	8	6	5	7	10	1	3	1
YLL067C	45.408	92.611	105.609	71.744	22.456	0	20.872	58.191
YHR086W-A	0	0	0	0	0	0	0	0
YBR020W	98265	70462	58649	100261	139112	63611	89547	84546
YLR418C	474	368	325	569	753	340	491	526
YDR112W	4	2.139	1.061	2	0	0	1	2
YER059W	503	395	367	538	660	341	521	483
YNL076W	1029	740	587	1109	1212	528	692	729
YBL025W	188	129	110	181	215	82	103	138
YOL066C	701	480	366	740	630	328	367	399
YDR126W	181	157	160	241	213	95	154	157
YPL216W	459	355	258	480	419	146	206	274
YOR223W	179	117	126	222	283	152	238	150
YEL022W	716	620	395	783	1113	423	538	567
YHR072W	1562.81	1209	938	1901	1485	821	983	1246
YOL019W	1403	1050	735	1681	1822	883	987	1360
YLR463C	61.617	31.518	33.229	86.602	81.555	36.962	72.378	53.351
YJL190C	4409	2330	2871	5001	5832	3420	3778	6288
YMR218C	473	476	283	532	726	268	392	398
YNL265C	516.965	378.983	366.996	583.995	670	319.989	419.986	412.96
YNL230C	357	259	205	429	331	159	202	183
YLL049W	322	233	238	346	410	153	229	265
YHR211W	691.481	513.998	443.643	738.311	901.04	398.187	572.158	466.393
YPR166C	378	271	317	462	653	252	376	450
YJL042W	1240	898	579	1061	2392	773	1457	822
YNL301C	1474.63	853.842	889.416	1686.36	1507.42	696.598	782.951	1088.29
YDR333C	846	698	454	860	1139	462	672	689
YMR058W	242	196	107	1019	637	390	455	259
YDR061W	680	475	447	776	909	410	589	509
YJR112W-A	364	199	234	376	328	172	199	254
YOR290C	1441	1037	763	1585	2265	985	1301	1069
YKL114C	809	523	407	870	768	374	443	515
YML024W	6381.12	3553.88	4116.91	7079.84	9406.6	4723.15	5633.82	8355.62
YML093W	2890	1833	1214	2929	2123	1151	972	1929
YHR197W	1116	843	533	1194	1008	449	315	909
YDR276C	1634	1155	1183	2089	2684	1054	1593	1596
YLR200W	472	329	318	539	517	241	283	433
YKR003W	531	406	406	672	892	328	556	347
YLR107W	1676	1186	768	1889	1441	437	555	858
YMR321C	22.088	10.748	25.679	24.277	12.647	18.868	17.379	48.295
YER175C	312	209	206	380	429	158	272	207
YIR012W	2790	1712	1499	3143	2226	1223	1106	1981
YDL183C	336	263	176	314	433	139	232	207
YPL278C	404.651	319.824	300.267	511.377	346.998	171.407	179.38	167.203
YMR105W-A	2	1	1	2	6	0	1	5
YMR118C	385	387	430	615	371	125	160	98
YCL049C	1258	858	868	1406	1396	640	890	999
YBL066C	743	555	341	705	1600	803	1050.98	951
YGL120C	4568	2899	1848	5481	3435	1571	1269	3010
YGR271C-A	647	449	397	764	742	206	338	536
YDR169C	1027	748	516	1084	1299	657	899	800
YOR057W	598	445	423	759	799	331	453	495
YLR410W-A	476.919	636.06	323.674	1091.57	1346.11	75.505	599.477	502.464
YLR169W	0	1.006	0	2	2	0	2	2
YMR272C	2809	2018	1929	3106	2381	1210	1698	1518
YPR108W	1174	893	740	1306	1991	735	1207	1067
YKL054C	3989	2874	1886	4395	4364	2084	2603	2726
YGR162W	5555	3579	2232	5768	4847	2425	2343	3914
YDL165W	434	248	301	451	513	269	341	390
YDR520C	542	498	320	708	560.959	214	382	432
YKL023W	424	269	260	470	366	197	284	308
YJR051W	840	539	498	868	966	482	764	890
YNL009W	275	205	162	338	372	136	252	162
YFL034W	512	386	306	559	753	329	401	391
YKL164C	5224.02	4929.43	3241.71	8225.48	13493.9	6694.35	8200.49	9396.18
YJR135C	183	127	109	219	190	84	120	160
YGL213C	470.991	352	273	509	709	326	392.989	457
YOR161W-A	0	0	0	0	0	0	0	0
YMR076C	542	454	391	663	807	402	456	489
YOR161W-B	3	0	0	1.047	1	0	0	2
YJR037W	0	0	0	0	0	0	0	0
YNL027W	685	571	394	804	900	393	582	508
YLR291C	789	618	441	878	813	446	545	624
YDR210W	327	197.997	253.999	392	247.997	141	156	229.998
YIL122W	755	575	414	825	880	360	485	416
YDL230W	426	297	280	442	487	249	375	248
YJR113C	1033.98	670.955	737.82	1222	1461	798.986	1046.98	996.98
YGL075C	261	148	145	286	311	134	172	160
YHR041C	245	109	191	280	334	179	225	284
YIL156W-B	596	295	414	566	592	276	377	463
YIL156W-A	0	1	0	1	4.011	0	0	1
YLR416C	2	1	7.518	5.598	7.136	2.567	2.095	3.274
YGR097W	3788	2876	1497	4093	3552	1370	1863	1746
YIL068C	526	456	319.978	609	923	372	534	452
YCL025C	3486.43	2040	1443	3316	4655.01	2163.07	2298	3191.53
YNR034W	212	184	162	244	243	154	263	252
YOL085C	1	1	1	6	0	0	0	0
YNL282W	296	140	138	382	234	127	134	193
YBR286W	3381	2305	2267	4342	7407	2239	3761	2950
YGL144C	659	439	365	669	601	255	298	388
YDR190C	2179	1438	1160	2304	2336	1149	1345	1752
YAL031C	522	414.95	311	553.963	887	369	646.969	359
YBL006C	530.637	283.472	334	564	564.651	228	398.873	373
YNL132W	2160	1567	961	2195	1862	971	898	1728
YBR264C	272	157	186	295	247	120	128	177
YBR231C	430	273	316	540	538	273	278	320
YLR162W-A	0	4	1	1	0	0	0	1
YPL197C	4.01	1.002	4.009	4.009	6.01	0	1.003	10.03
YHR076W	622	372	412	708	740	314	464	513
YDR462W	498	338	356	620	577	348	429	460
tP(UGG)Q	0	0	0	0	0	0	0	0
YJL148W	1443	1018	813	1946	1317	680	604	1317
YIL057C	295	174	220	489	280	238	332	814
YPL055C	628	369	349	776	494	231	317	365
YLR353W	430	272	256	480	781	309	416	438
YIL020C	255	194	223	295	275	189	174	286
YIL148W	7302.14	4249.1	4987.8	8468.32	9827.99	5291.13	6077.74	8750.18
YNR016C	4454	3531	2811	5549	9785	5511	7795	7675
tY(GUA)J1	0	0	1	2	4	0	1	1
YFR036W	298	170	178	374	258	108	145	172
YER023C-A	0	0	1	0	0	0	0	2
YHR114W	671	492	423	735	792	355	539	495
YGR028W	924	719	521	1050	1157	436	726	673
YER150W	1465	1052	1062	1878	2424	633	1205	750
YNL279W	64	41	31	56	30	14	24	25
YDR400W	476	368	306	554	521	288	335	424
YDL068W	4	0	0	3	5.065	0	1	0
YOL027C	2396	1514	1279	2550	3451	1706	1915	2402
YPL257W	65	50	40	88	111	32	74	47
YPL120W	243	219	152	245	312	120	215	167
YOL145C	1451	1173	725	1455	1870	807	1054	1228
YJL099W	720	587	425	708	921	392	472	391
YHR149C	1031	716	578	1122	1121	626	577	884
YDR395W	1826	1441	1004	1927	1928	888	1047	1512
YOL110W	301	215	238	354	561	216	302	307
YDR005C	860	682	553	994	1232	428	719	652
YMR311C	1180	760	758	1264	1558	641	987	900
YHL041W	1	3	0	4	0	0	0	1
YBL039C	3768.41	2507.71	1920.59	4295.89	2834.16	1532.33	1298	2886.38
YGR188C	278	205	183	314	283	137	165	179
YOR362C	1665	1074	1183	1882	2383	1076	1440	1528
YPR106W	254	221	180	313	341	148	283	253
YLR126C	428	290	261	503	336	193	168	328
YDL053C	1009	710	691	1210	1299	567	763	935
YML074C	2272	1326	1267	2455	2349	1240	1312	1946
YKR062W	982	589	511	975	893	387	519	673
YBR235W	1046	732	564	1113	1253	522	756	717
YER010C	486	382	377	595	672	254	399	353
YML003W	84	85	45	98	134	34	72	56
YMR097C	431	322	327	500	584	308	419	439
YDL133W	532	419	340	580	936	342	488	409
YNL330C	756	537	502	790	933	470	640	660
YGR228W	8.053	4	4.075	3.063	28.379	3.021	5.033	32.989
YHR096C	1155.63	1015.74	730.74	1828.41	2638.79	406.863	989.973	507.914
YBR008C	427	391	262	552	471	198	311	341
YDL035C	1010	781	558	1230	1361	601	885	817
YMR253C	203	180	141	251	381	140	262	106
YCR102C	66.264	45.98	38.895	92.271	62.876	34.277	31.428	77.154
YJL127C-B	287	281	283	390	484	188	304	404
YOR257W	335	201	239	328	372	166	247	278
YGR002C	596	443	309	613	627	262	354	414
YEL041W	284	232	201	315	443	161	294	181
YGR075C	85	78	74	105	116	42	75	67
YGR253C	1416	990	1112	1651	2356	1098	1506	1377
YDR510W	1571	961	1199	1720	1718	977	1119	1465
YEL014C	0	0	0	1	1	2	0	0
YPL050C	1515	1040	879	1715	1836	876	1058	1334
YMR166C	351	259	257	380	455	208	330	341
Q0115	0	0	0	0	0	0	0	0
YPR045C	409	225	202	494	615	197	357	276
Q0110	0	0	0	1	0	0	1.319	0
YPL231W	6641	4375	3897	7357	13953	8369	10100	11311
YLR148W	476	368	240	501	605	243	398	350
YMR137C	293	255	186	340	414	147	246	237
YDL082W	5190.44	2878.98	3065.42	6080.23	5344.35	3135.13	3342.7	5601.72
YKL155C	1093	802	620	1156	1215	616	651	744
YBR162W-A	851	480	728	1036	992	475	676	967
YFL042C	576	383	378	648	875	387	694	467
YBL083C	153.166	102.648	84.815	170.733	151.787	72.513	89.714	129.734
YDR148C	1408	945	984	1462	6824	3233	4782	4373
YHR052W-A	238.591	185.643	180.171	262.249	195.585	68.597	153.689	128.338
YPL096W	297	227	217	325	535	179	260	262
YDR335W	1176	919	685	1311	2027	734	1158	954
YPR141C	281	269	208	345	394	163	230	274
YJL067W	0	2.01	1.012	3.005	1.004	0	0	0
YMR039C	934	587	485	1011	1049	526	623	733
YIL058W	9	8	4	16	11	2	10	6
YNL320W	288	214	197	316	483	170	253	246
YPL078C	1457	966	999	1716	6863	2787	3994	3831
YCR095C	308	252	222	341	442	150	218	233
YLL011W	1570	1012	727	1598	1446	724	725	1267
YCR077C	2021	1410	971	2025	2694	1083	1465	1434
YLR437C	346	184	206	400	242	132	166	194
YFL064C	426.694	187.106	160.576	280.136	168.781	147.343	120.775	196.979
YNL191W	857	586	445	1058	594	284	314	445
YDR237W	821	594	604	967	1309	544	789	833
YJL110C	977	791	511	1001	1295	501	603	622
YKR048C	3131.92	1841.94	2275	3139	3808.86	1859	2180.88	2408.9
YBR001C	714	574	505	745	1114	449	921	494
YPL003W	186	137	152	209	389	144	308	176
YKL108W	410	246	253	476	434	239	263	274
YGR110W	256	218	165	315	416	199	315	303
YJR074W	406	271	379	503	735	491	595	633
YPR127W	913	769	820	1493	1964	663	1092	694
YIR028W	66	58	57	77	83	41	54	55
YAL012W	2875	1873	1653	3322	3206	2045	1972	2435
YMR288W	648	478	318	660	818	341	481	432
YIL156W	523	366	223	526	688	306	490	328
YBR241C	523	374	363	639	1214	355	684	322
YHR063W-A	2.015	1.005	0	1.001	5	1.005	2.024	4.01
YJL212C	81	69	36	109	55	32	25	68
YPL156C	215	202	132	212	332	154	222	284
YNL312W	668	464	598	886	941	512	629	769
YLR187W	420	360	223	487	476	255	277	249
YDR099W	2677.18	2258	1896.74	3458.66	5292.31	2102	3033.9	2681
YKL133C	541	410	396	619	632	241	376	314
YLR400W	9	0	2	8	4	1	4	4
YHR170W	3759	2544	1779	4437	3308	1396	1396	2742
YDR259C	295	310	279	458	206	88	147	117
YKL068W	1752	1263	798	1766	1685	840	949	1317
YOR032C	404	334	213	382	220	76	109	81
YKL093W	1186	851	764	1328	2387	866	1438	927
YMR002W	1812	1243	1602	3192	2541	1291	2019	1915
YLR145W	302	181	198	333	285	132	193	205
YLR261C	125.509	74.89	59.364	176.513	172.719	82.168	87.09	146.061
YDL246C	204.398	116.386	143.812	280.471	147.672	45.618	135.26	157.905
YER081W	1030	727.892	784.378	1171.84	1620.1	404.382	573	485
YPL178W	729	476	439	762	887	385	485	638
YMR172C-A	1.013	1.02	1	0	0	0	0	0
YPR202W	125.319	189.791	84.876	263.248	174.498	65.747	106.797	93.982
YIL096C	814	571	339	894	495	233	201	437
YOL046C	1.001	1.002	0	1	3	0	0	1
YFR011C	550.891	367	404	591	1619.98	695.947	858.957	1045
YIL074C	802	610.466	532	1021.95	1565.5	620.618	726	728
YGL173C	2362	1708	1475	2510	3924	1498	2226	1934
YHL008C	1000	640	524	1073	1107	449	613	560
YLR457C	456	285	285	436	325.991	159	192	219
YNL249C	334	281	230	432	299	133	208	257
YGR056W	922	756	415	939	1217	501	666	648
YGL065C	276	234	174	312	556	213	317	285
YOR052C	2530	1635	1482	3513	2051	771	1358	1330
YGR116W	1752	1382	783	1825	2586.99	974	1431	1350
YOR343C	75	35	30	71	138	68	100	122
YGL230C	22	15	12	30	41	19	35	17
YOL159C	362	355	309	457	401	171	222	242
YBR185C	448	371	334	575	912	311	533	458
YOR010C	121	98	86	137	101	42	64	73
YDR290W	0	0	0	0	0	0	0	0
YDR019C	178	162	140	307	914	156	135	160
YBR150C	409.942	360.338	255.463	473.695	701.706	273.638	482.681	402.341
YIR042C	137	79	67	190	46	23	45	73
YFL031C-A	0	1	0	0	1	2	1	2
YER119C	454	357	421	496	880	311	631	375
YMR196W	981	909	708	1098	4481	892	2124	552
YMR161W	443	278	271	465	497	230	261	287
YDR499W	425	336	268	499	584	238	374	308
YKL068W-A	450	280	280	417	334	168	159	300
YJL133C-A	596	330	179	420	167	105	128	200
YHL046W-A	0	0	0	0	0	0	0	0
YDL215C	3900	3382	1510	3687	5552	1571	2541	2669
YJR120W	26	22	19	28	168	58	72	61
YLL061W	433	279	234	401	478	307	330	601
YDR110W	739	502	422	821	823	293	359	518
YDR419W	479	344	263	541	474	205	269	261
YOR221C	991	766	582	1120	959	402	502	535
YPL214C	768	571	652	929	837	376	573	483
YBL108C-A	18.666	18.715	12.594	29.49	29.682	13.446	4.464	21.102
YGL165C	3	7	3	3	6.03	0	5.035	1
YOL064C	527	394	354	689	608	280	412	395
YBL023C	905	577	460	804	1116	550	629	568
YOR274W	631	377	342	591	645	358	346	493
YOR329C	1517	1129	777	1715	2148	773	1179	858
YLR005W	885	589	506	929	886	424	638	720
YDR124W	45	50	48	70	100	44	57	60
tI(UAU)L	0	0.5	1	0	0	0	0	1
YNL267W	1111	775	591	1175	1357	599	846	820
YBR134W	0	0	0	1	1	1	0	2
YLL047W	3	3	0	2	3	1	1	2
YLR461W	8.642	3.713	5.563	2.901	7.88	3.649	3.181	0
tI(UAU)D	0	0.5	0	0	0	0	2	0
YLR050C	278	189	284	344	394	170	270	311
YOR124C	855	790	583	878	1761	574	1026	657
YDR067C	231	258	176	351	636	157	274	229
YMR056C	393	238	278	532	585	226	418	325
YHR032W-A	91	73	80	116	80	42	52	78
YJL044C	884	674	451	947	1015	401	552	610
YPR164W	795	625	366	867	1069	363	547	533
YEL060C	4462	3653	3105	5144	9184	3310	5405	2334
YHR195W	674	448	395	740	1004	398	588	509
YLR101C	12.139	18.133	14.099	27.124	14.061	3	12.077	13.206
YBL107W-A	8.063	9.097	2.24	10.978	11.021	1.23	4.211	4.264
YML026C	6708.7	3478.93	3861.33	7155.96	8858.06	4213.39	5617.37	8151.6
YPR066W	132	86	95	155	150	53	109	75
YDR073W	505	320	351	700	514	224	327	410
YDR229W	591	403	359	658	870	362	512	438
YDL181W	388	263	370	483	2249	953	1331	1417
YBR022W	343	250	225	330	340	147	182	208
YER177W	8597.69	5446	6100	11679	11842.6	5640	7294	7412
YML048W	2162	1390	1063	2398	3130	1356	1699	2097
YBL064C	3194	2492	2556	4011	5978	2362	3530	2854
YIL045W	141	99	93	161	526	101	248	94
YKL221W	41	39	32	76	59	28	31	35
YGL126W	1526	927	866	1735	1262	508	725	878
YLR167W	17395.2	8799.13	10768.3	18166.2	22337.1	11348.2	14373.4	21420.1
YMR270C	451	335	327	538	587	280	358	474
YLR293C	6665	3738	3682	7553	5982	3266	3525	5574.93
YLR228C	509	366	207	459	772	316	507	429
YJR053W	183	129	95	225	231	91	134	100
YJL171C	2366	1678	1419	2659	2961	1244	1408	1465
YDR374C	48	25	32	46	34	6	10	15
YKL021C	839	586	494	915	861	412	514	762
YDL167C	1426	1041	640	1610	1395	590	598	983
YLR388W	2481	1307.42	1671	2513	3370.47	1807.47	2263	3242.48
YLR373C	374	363	228	484	741	250	421	363
YKR001C	1651	1182	1050	1647	2815	1132	1639	1516
YKR054C	579	418	338	580	716	330	472	561
YIR034C	960	665	545	1266	561	362	432	679
YGL013C	1265	988	625	1421	1380	491	739	765
YJR068W	759	552	532	1014	979	476	519	771
YGR207C	746	538	583	1016	1457	591	842	765
YDR212W	1791	1360	1102	2035	2419	1176	1477	1710
YNL052W	681	496	595	711	6076	2752	4059	3719
YGL188C	93	73	86	99	578	268	294	359
YNL025C	225	224	154	345	357	108	232	141
YGR121W-A	3	2	2	7	4	5	4	5
YGR091W	358	245	218	365	341	162	162	241
YDL232W	144	80	118	177	178	90	118	134
YPL119C	390	327	200	417	821	248	443	194
YLR242C	117	100	37	112	162	44	73	70
YMR031W-A	0	2	0	0	1	0	0	0
YJR148W	2403	1492	1272	2495	2084	858	1008	1329
YJR082C	605	520	502	844	573	319	379	463
YOL087C	1451	1005	763	1530	2496	878	1497	1028
YNL134C	4052	2732	2205	5295	3652	1364	1973	1743
YAL037W	87	90	70	135	103	48	72	59
YGL146C	489	282	222	446	604	285	389	473
YCL075W	0	0	0	0	0	0	0	0
YBR262C	629	373	522	761	668	397	569	850
YPL199C	537	380	371	578	536	278	385	551
YML101C-A	4	2	4	4	8.893	4	4.164	8
YFL036W	2605	2025	1246	2553	3223	1182	1692	1602
YDL209C	312	226	211	415	532	170	244	235
YIL051C	2103	1617	1905	2878	2951	1320	2044	2134
YPL057C	3256	2285	1661	3534	3845	1623	1940	2966
YNR010W	177	128	124	216	221	108	126	148
YDR365C	2351	1455	1046	2389	2037	982	857	1761
YLR308W	19	7	10	23	5	0	0	7
YNL169C	267	211	215.725	261.644	1138.77	670.88	861	741
YFR034C	542	375	377	684	622	329	395	440
YHR070W	1336	776.952	533.981	1480.94	896.919	427	400.91	752.984
YDR460W	512	328	307	542	556	325	365	382
YNL112W	10238	5209	3173	9952	10022	3719	2583	9079
YHL047C	577	430	284	733	513	198	282	303
YOR360C	4450	3477	1755	5339	4285	1074	1538	1931
YOR335C	5493	3759	2334	5629	5405	2437	2609	3959
YDR354C-A	0	1.342	0	0	0	0	0	0
YKL100W-A	0	0	0	0	0	0	0	1
YGL251C	259	201	141	269	290	125	156	148
YER156C	1303	787	794	1423	1745	886	940	1517
YPL255W	167	141	164	299	364	183	218	247
YOR095C	921	676	513	1055	1235	607	654	1412
YEL038W	1004	617	600	1109	974	401	547	648
YCL014W	760	586	437	825	945	464	556	608
YOL025W	435	353	261	515	617	234	367	259
YPL208W	455	304	326	524	553	257	353	363
YOL147C	747	454	527	1110	935	517	633	859
YNL280C	677	514	559	821	1100	493	656	747
YDR007W	6576.69	4290.47	4928.68	7120.6	1104.93	568.631	815.687	902.805
YIL160C	210	109	103	310	454	96	178	118
YPR089W	806	715	482	858	1382	487	720	690
YBR233W	390.991	272	267	457	506	266	340	336.989
YPL122C	363	304	232	381	526	200	203	259
YKL104C	7946	5894	3397	7443	6875	3228	3466	4305
YMR313C	763	557	421	742	1079	392	627	473
YGL179C	451	361	246	573	647	173	227	210
YGR120C	243	200	188	290	318	122	187	213
YML001W	531	326	426	685	1069	413	703	701
YLL028W	1969	1230	859	2161	2224	525	739	562
YER016W	304	167	207	360	465	228	296	371
YHR061C	147	109	114	177	390	166	234	224
YDR438W	206	155	123	215	245	103	161	147
YNL211C	67	66	32	96	135	31	57	90
YLR124W	1	2	1	1	3	3	1	6
YML058W-A	123	72	56	106	74	27	61	95
YLR026C	556	417	373	656	682	349	439	444
YJR065C	1957	1417	1453	2376	3427	1482	2120	1779
YDL131W	2265.22	1542.36	1192.75	2944.3	2093.65	1331.33	1385.33	2210.89
YMR095C	33	39	30	59	24	7	13	15
YER138C	13019.9	7959.07	2817.35	10009	11689.9	4444.27	7602.44	4490.1
YDL033C	401	244	234	430	293	180	197	318
YMR255W	484	351	368	614	568	262	370	403
YHR209W	1169	1143	976	1677	2050	666	1036	889
YGL247W	166	98	108	174	190	77	105	150
YCR100C	36	42	22	50	94	32	54	23
YDR516C	1495	1100	1049	1310	3199	1246	2145	1332
Q0130	1	3	1	1	10	0	8	5
YPL233W	340	210	223	420	348	172	220	253
YOR255W	11	7	7	15	7	3	2	2
YOR063W	41327	23051	22847	42939	39007	21907	23816	33812
YOR200W	1.005	2	0	2.014	2.018	0	0	1.009
YGR251W	452	256	257	479	290	163	172	301
YPR047W	509	403	301	480	723	253	419	355
YDR246W-A	10	5	6	10	15	3	8	4
YDR044W	960	506	454	773	774	513	552	692
YEL016C	477	286	399	585	514	277	369	404
YAL027W	140	114	98	185	212	97	119	154
YKL153W	10.013	8.02	18.046	23.034	26.039	17.047	13.031	19.037
YFL019C	7	17	10	18	13	7	12	4
YMR139W	382	303	267	378	814	276	518	321
YDL080C	631	379	341	665	549	275	375	400
YOR172W	499	466	263	574	728	278	412	384
YOR105W	174.311	145.467	129.221	214.436	251.891	78.9	131.592	151.587
YJL138C	9265.86	6230.52	4578.47	10772.9	8666.18	4204.41	5285.82	7773.91
YPR143W	1086	624.998	572	1309	1001.99	476	546	907.99
YDR340W	97	137	73	106	183	44	70	107
YNL322C	2240	1458	1556	2813	2835	1317	1863	1719
YPL090C	10117.2	5260.9	5827.07	10356.4	12736.3	7154.6	7669.6	12729.3
YPR078C	102.345	69.842	42.381	117.051	50.371	13.021	13.97	39.899
YCR075C	80	63	79	114	234	94	164	103
YFL062W	29.619	26.595	31.476	47.396	14.283	3.636	7.693	12.139
YDR171W	1577	1199	1562	1998	4442	790	2064	471
YLR439W	1158	704	608	1151	1627	840	926	968
YCR020C	167	112	92	156	145	55	78	87
YDR450W	6904.3	3695.07	4429.67	7561.04	9530.94	5058.61	6040.63	9101.4
YCL051W	534	361	311	554	671	320	551	357
YCR097W	406	278	308	461	808	264	424	436
YBL039C-A	11.592	3.293	5.406	10.11	2.841	8.669	0	5.622
YDR235W	210	222	141	246	464	131	229	196
YGL194C-A	65	48	75	97	84	24	42	66
YER038C	247	229	125	264	231	101	142	177
YPR125W	2023.99	1305	819.989	2175	1862	780	920.984	1307.98
YHR049W	4676	3063	2473	5309	3902	1932	2063	2698
YBR007C	867	710	465	914	866	388	445	516
YPL001W	332	294	218	383	470	186	251	263
YJL038C	23	26	25	41	23	10	13	18
YNL319W	2	2	0	2	3	0	3	1
YPR178W	452	278.939	278	456.919	522	245	349.98	359
YER079C-A	0	0	0	0	1.006	1	0	0
YDR475C	707	510	416	714	990	484	632	400
TLC1	693	517	488	1088	1579	508	1121	1172
YNL159C	228	183	150	267	385	125	252	183
YAL014C	511	330	266	557	596	278	381	409
YCR020W-B	98	92	61	139	168	37	82	113
YBR243C	372	261	247	435	592	274	402	473
YLR181C	446	263	320	494	517	261	303	372
YBL056W	1081	804	644	1188	1924	718	1212	1312
YNL075W	1113	778	601	1130	1011	508	483	1033
YPL150W	761	547	496	791	1017	388	616	620
YJL012C	1263	885	667	1326	1498	740	1012	969
YJL065C	410.997	286.976	298.988	492	400.964	218	331	414
YKR020W	192	140	141	238	271	93	181	167
YMR053C	182	172	150.868	263.447	502.774	143.804	341.346	131.442
YKL066W	211	163	201	262	583	267	489	521
YMR004W	468	402	292	483	765	321	484	384
YER083C	833	543	517	871	1113	475	702	693
YPL176C	1119	811	720	1255	1604	655	954	854
YHR172W	218	192	144	282	372	168	211	248
YLR263W	844	621	471	827	1268	518	709	696
YDL240W	400	345	153	386	751	283	426	361
YDR401W	12	10	11.529	11	11	7	3	8
YGL118C	0	0	2	1	0	0	0	2
YHR013C	560	369	342	547	688	373	438	578
YOL040C	9639	5313	5905	10878	12300	6863	7265	11211
YGR072W	586	435	339	658	618	273	350	417
YCL035C	1759	1209	1594	2507	2689	1109	1718	1574
YIL023C	4385	2665	2612	4790	3291	1388	1649	1950
YNR073C	308.275	268.895	232.486	279.835	447.555	318.448	335.894	203.332
YPR200C	54	35	42	76	79	19	35	40
YIL072W	271	219	215	350	235	118	123	165
YLR327C	2714	1836	2530	3526	2329	1767	3186	4062
YBR229C	792	605	474	858	1548	461	853	625
YML133C	71.76	23.009	22.087	79.03	139.304	57.383	0	8.175
YOR131C	367	211	288	456	566	248	338	341
YLR455W	417	361	288	484	479	211	294	303
YNL247W	2148	1520	1200	2442	2712	1230	1534	2008
YOR054C	611.798	522.829	399.196	695.042	916.856	406.597	707.025	422.254
YGL007C-A	8	2	11	8	15	6	5	9
YFR028C	756	546	442	856	942	493	594	612
YGR290W	2	0	0	1.008	3	1	1.008	1
YOR009W	253	212	151	288	456	185	298	198
YOR072W	11	5	4	12	8	1	7	3
YDR292C	1039	753	605	1137	1287	609	770	945
YOR161C-C	3	3	2	4	3	1	1	3
YHR126C	201	75	48	409	9	3	5	45
YMR194W	2342.6	1348.76	1575.13	2772.1	2584.47	1479.75	1647.09	2762.57
YAL016C-A	0	2.025	4	4	8.103	7.112	2	4.05
YMR167W	549	393	251	516	630	274	348	385
YOR249C	313	247	208	311	493	139	238	225
YER117W	6246.36	3079.81	4113.53	6730.33	8584.24	4340.73	5445.24	8098.18
YOR301W	187	117	139	253	300	181	228	301
YPL187W	74	46	47	79	220	119	149	138
YKL218C	261	182	194	297	412	183	224	203
YOR140W	1067	768	473	1377	1298	651	783	800
YDR391C	576	411	419	683	652	220	371	316
YLL063C	211	118	144	202	181	85	148	88
YAR070C	0	0	0	0	0	0	0	0
YOR276W	961.941	650.965	659	1091	1320.96	718.946	848.991	1201.93
YMR309C	4195	3676	1804	4496	5733	2131	2551	3467
YOR089C	1139	772	762	1335	1368	536	899	856
tD(GUC)N	0	4	0	0	10	2	0	5.472
YGR258C	2177	1465	927	2188	2130	671	876	982
YNL146C-A	58	62	22	43	28	13	23	30
YMR180C	788	503	540	844	629	269	422	484
YGL163C	1237	890	679	1250	1025	497	544	569
tD(GUC)Q	0	0	0	0	0	0	0	0
YDR417C	6.016	6.013	4.009	10.011	10.018	5.02	2.005	13.702
YOL131W	8	6	3	7	4	1	5	4
YOR011W-A	0	0	0	1	0	0	0	0
YPL283C	1773.86	1117.53	603.94	1476.54	1419.34	693.43	803.278	889.117
YBL021C	158	93	105	190	219	138	149	267
YHR215W	181.986	203.955	171.243	309.112	245.21	146.627	205.765	168.705
YLL045C	11943.9	6113.05	6718.94	12871.6	13430.2	7729.62	8468.22	13669.4
YLR156W	0	0	0	0	0	0	0	0
YLR007W	1909	1080	939	2085	1302	600	687	831
YNL261W	512	420	261	569	533	171	188	241
Q0092	0	0	0	0	0	0	0	0
tE(UUC)Q	0	0	0	0	0	0	0	0
YNL305C	802	636	676	982	1524	555	1049	556
YJL046W	402	392	233	474	430	197	335	350
YKR078W	330	267	223	338	449	160	256	240
YOR191W	1133	817	557	1091	1343	589	782	748
YEL074W	25	23	16	27	37	15	27	17
tE(UUC)M	1.5	1	0	0	0	0	0	0
tI(GAU)Q	0	0	0	0	0	0	0	0
YOL166W-A	0	0	0	0	0	0	0	0
YDR272W	972	625	740	1094	1539	603	1033	735
YGR289C	689	486	432	664.992	870	352	621.992	437
YML020W	595	408	293	646	723	370	465	387
YLR103C	418	306	279	460	565	296	363	406
YOR294W	1713	1049	901	1821	1262	735	686	1399
YEL062W	392	298	221	547	447	166	223	232
YPR064W	4	3	0	2	6	3	6	6
YPR031W	517	410	315	567	564	278	328	420
YLR038C	798	542	671	876	3766	1632	2356	2159
YNL096C	4031.8	2373.3	2277.04	4631.58	4828.79	2642.14	2791.64	4269.44
YDR038C	1428.2	950.119	730.575	1258.31	1216.76	465.787	720.888	928.886
YPR160W-A	0	0	0	0	0	0	0	0
YDL187C	46	31.986	16	45	31	15	22	21
YBR024W	451	318	357	534	800	266	395	338
YER171W	920	694	474	896	948	379	531	640
YDL047W	1549	981	903	1626	1620	834	950	1307
YML046W	358	372	208	440	528	172	269	293
YGL124C	402	393	326	538	583	224	377	344
YMR276W	1587	1090	1094	1818	2548	1271	1824	1598
YEL059W	21	19	6	32	9	6	16	11
YDL160C-A	116	60	73	101	157	61	78	94
YLR165C	295	217	182	314	363	121	183	189
YCR069W	1198	897	849	1457	1684	739	1049	976
YKL223W	0	0	0	0	0	0	0	0
YGR146C-A	0	9	2	2	4	0	0	3
YKL027W	1563	959	803	1738	1264	620	658	1050
YJL173C	482	318	474	659	741	387	403	540
YDR152W	1307	769	841	1319	1349	683	783	1167
YKL127W	352	269	235	412	876	428	586	522
YDR309C	1658	1072	777	1695	1878	1022	889	1261
YLR386W	561	443	358	626	834	380	502	508
tN(GUU)Q	0	0	0	0	0	0	0	0
YLR371W	1135	822	538	1151	1671	680	1053	798
YDL169C	254	193	185	331	494	153	264	173
YLR092W	161	114	96	146	270	166	192	160
YER044C	822	775	811	1022	1994	905	1290	1259
YMR072W	1220	907	896	1746	1979	871	1220	1432
YJR033C	658	578	333	713	1050	365	698	455
YKR056W	2050	1434	1089	2294	2230	983	896	1623
YGL011C	1669	1076	1163	1813	2192	1105	1459	1333
YIR036C	568	405	539	714	1115	505	691	558.985
YMR123W	477	343	308	518	564	278	341	547
YDR406W	4912	3513	2311	4893	4261	839	1869	729
YGR073C	34	27.227	27.303	39	60	28	26	35.471
YGR209C	1849	1254	1592	2720	2121	848	1389	1412
YJL150W	1	0	0	3	2	0	4	5
tS(UGA)E	3	0	5	2	3	2	2	1
YNL050C	907	564	482	935	670	366	393	611
YMR304C-A	315.622	336.295	286.654	472.421	730.348	261.116	323.796	511.787
YLR240W	496	406	315	461	722	288	492	358
YGR093W	779	587	461	883	759	326	415	614
YDL234C	1732	1635	1313	2484	2359	855	1406	1006
YPR108W-A	0	0	1	3	4	1	0	2
YNL136W	631	439	371	723	612	314	411	429
YKL049C	449	260	303	497	473	256	259	361
YJR080C	611.77	464	432	728	1637	661.934	1021.8	957.852
YNR038W	955	716	470	1083	1184	449	566	808
YGL140C	880	627	414	863	1262	484	655	662
YCL029C	683	371	335	700	675	325	423	433
tY(GUA)Q	0	0	0	0	0	0	0	0
YFL038C	3298	1988	2328	3726	4379	2233	2708	2903
YJR131W	485	351	296	473	627	255	375	368
YNR012W	883	675	477	1011	881	369	422	691
YNL110C	2037	1321	1057	2269	1908	887	843	1668
YAL068C	1.036	0	0	0	1.019	0	0	0
YDR367W	199	176	175	223	496	178	297	280
YIL053W	21875	11477	9973	25249	7129	3747	3859	8905
YPL059W	761	513	607	854	940	464	599	690
YGL253W	11945	7779	6795	12293	10460	8561	8030	17297
YHL032C	2352	1596	1333	2365	5256	2335	3468	2386
YJL010C	976	707	503	1049	970	449	451	737
YHL045W	3	0	7	3	0	1	0	1
YOR337W	1897	1245	790	1782	1437	727	591	923
YMR010W	1147	1015	618	1422	1721	479	689	807
YOR097C	259	155	177	235	389	159	255	218
YHR118C	343	248	201	402	333	154	211	280
YGR024C	581	543	421	707	769	302	454	550
YOL023W	640	522	357	699	799	318	488	426
YPL253C	185	162	120	254	291	117	175	154
YOR008C-A	0	0	0	0	1	0	0	0
YER154W	1380	886	873	1582	1747	978	1066	1442
YBR300C	0	0	1	0	0	0	1	0
YEL036C	2374.67	1586.64	1351.41	2799.89	2454	1171	1380.4	1852
YBR260C	525	415	355	610	711	346	425	388
YPL124W	146	105	102	174	215	103	135	148
YAL042W	1749.99	1043	1164.98	1965.97	2167.99	1149	1486.99	1769.97
YAL035W	4416	2992	2115	4696	4475	2162	2383	3497
YNL286W	404	238	261	473	361	146	231	266
YDR001C	4898	3293	2715	5088	5689	1919	3238	2182
YIL162W	8008	5383	5136	7665	6377	4190	6275	8023
YOL141W	222	125	83	227	238	87	95	157
YHR145C	8.922	24.86	25.451	12.066	46.371	0	21.45	20.249
YBR195C	405	238	273	526	424	195	240	261
YIL039W	866	647	573	1029	1368	614	755	993
YGR122W	209	196	154	238	410	152	247	235
YPL092W	251	201	168	317	653	186	264	233
YGR161C-D	1568.96	1158.72	552.03	1498.33	1574.44	748.373	903.764	478.928
YMR315W	1859	1454	1499	2441	2751	1352	1863	1575
YGR213C	99	102	64	144	68	7	31	54
YDR384C	957	637	455	959	547	270	340	770
YML007W	2380	1648	1225	2430	2566	1069	1449	1580
YER063W	561	369	397	645	944	410	555	627
YDR481C	1560	1078	899	1717	1819	755	1181	1076
YER014W	682	450	437	816	743	357	475	433
YPR041W	3468	2204	1867	3999	3256	1625	1660	2884
YNL213C	597	449	413	705	727	347	394	512
YKL006C-A	492	290	369	604	587	309	459	457
YDL159W-A	0	1	0	0	0	0	0	0
YBR058C	1140	908	589	1230	1503	642	895	930
YLR024C	396	307	218	411	462	157	337	300
YLR071C	926	806	441	959	1331	439	678	693
YHR092C	5932.19	3516.08	1966.83	7065.84	1771.49	645.073	378.104	2598.75
YDL199C	215	177	155	206	476	135	324	142
YHL007C	2373	1483	1043.99	2590	2383	1175.97	1325	1741
YER181C	4	3	3	8	6	0	1	0
YNL228W	3.008	4.015	3	6.042	8.033	3.021	3	2.037
tV(AAC)O	0	0	2	0	0	1	0	0
YDL064W	375	278	338	504	570	258	365	465
YDL031W	2309	1610	1063	2430	2108	1040	1013	1630
YMR257C	418	427	253	403	825	224	458	294
YBL108W	0	0	0	0	0	0	0	0
YDR046C	2178	1665	1156	1841	2052	1064	1225	1347
YOR253W	390	271	348	508	545	299	381	460
YOR202W	0	0	0	0	0	0	0	0
YEL010W	1	2	3	2	1	0	0	0
YGL245W	3613	2287	2015	3538	5120	2468	2794	3157
YGR006W	179	118	101	182	210	77	144	100
YGR079W	4868	3081	2489	4514	4989	1963	2145	2238
YDL119C	363	295	236	394	382	159	267	215
YKL151C	923	731	864	1244	2135	616	1169	679
YGL198W	528.939	390.975	417.973	671.951	893.989	406.984	668.984	573.945
YDL086W	1439.9	1053.89	1351.87	1968.76	2465.92	1279.86	1613.93	1766.92
YBL091C-A	210	119	179	256	279	127	185	145
YLR361C-A	253	186	219	359	311	122	178	210
YBR141W-A	0	0	1	0	0	2	0	0
YOR170W	1.018	0	0	1	0	0	0	0
YHR038W	353	279	240	403	550	181	261	283
YML069W	1324	897	781	1383	1655	798	986	1036
YKR019C	281	193	169	352	332	162	190	213
YJR073C	1029	767	984	1381	5463	2729	4132	3276
YGR279C	4860	3150	2886	5367	8057	3498	4742	5269
YCR073C	1416	1035	811	1404	1060	473	558	773
YCR022C	4	2	2	5	1	0	2	6
YLL015W	1155	958	701	1320	1667	631	979	861
YNL195C	132	152	142	186	635	85	221	39
YDL134C	1568.17	1107.55	961.248	1718.07	2608.83	1018.34	1359.98	1173.79
YFL060C	248.231	120.252	164.761	249.764	310.413	160.554	162.366	198.187
YDR173C	180	123	158	248	362	144	258	230
YMR100W	695	574	335	737	980	336	521	510
YCL057W	1213	968	800	1550	2939	1250	1737	1454
YOR335W-A	0	0	0	0	0	0	0	0
YBR072W	8291	5908	10545	16127	7873	1947	4274	2927
YBR005W	693	491	551	924	856	319	492	478
YPR123C	22.269	12.09	8.21	18.116	23.173	3.034	7.023	14.204
RUF5-2	481.287	475.882	410.09	623.643	443.143	141.699	345.833	295.199
YDL173W	836.945	527.994	533	954.932	1039.98	543.979	566.992	678.975
YJR047C	302.108	104	114.079	254.025	50.015	38.019	36.014	41.009
YMR006C	850.385	536	501	1144.25	1023	568	767.408	793
YKL145W-A	16.196	4.085	9.727	21.55	28.424	14.927	11.894	24.6
YAL016W	1722	1271.97	966	1756	2947.9	1097.89	1612	1482.95
YMR292W	129	134	109	171	295	84	152	196
YHR011W	319	232	179	331	424	209	267	265
YPL152W	292	212	255	371	492	216	319	215
YLR183C	313	279	363	547	717	421	460	548
YNL077W	476	352	333	620	528	262	353	395
YBR109C	1658	1218	1237	2208	2563	1181	1547	1745
YBR172C	2608	1800	1354	2744	3310	1685	1786	2591
YDR346C	2341	1514	1110	2693	2591	1096	1167	1890
YAR002C-A	2203	1593	1624	2426	3026	1394	1777	2179
YOL077W-A	835	500	680	973	2816	1167	1568	1747
YPL029W	658	495	439	694	758	311	424	492
YHR146W	1135	668	704	1425	1168	676	715	1093
YNL019C	0	0	7.794	4.849	0	1	0	0
YDL242W	8	7	2	10	13	3	6	2
YBR189W	10785.7	5812.95	6407.67	11832.3	14312.1	8332.25	8852.19	13428.6
YER085C	28	23	17	36	36	8	6	22
YJL225C	2392.09	1338.28	1229.53	2294.97	2448.08	1247.59	1702.64	1582.63
YKL064W	1606	1074	890	1656	2335	929	1361	1115
YLR265C	223	190	137	288	362	126	148	150
YKR022C	494	319	348	536	468	227	317	384
YLR287C	523	447	335	572	622	277	339	419
YPL174C	310	282	175	336	562	140	258	260
YOR070C	625	502	423	691	856	418	678	561
YDR403W	334	174	147	284	196	61	92	124
YOL093W	600	357	369	647	521	296	302	461
YOL042W	384	294	198	453	531	207	314	324
YIL070C	1524	1032	1051	1946	2074	890	1161	1461
YCL037C	65	47	31	86	130	67	52	90
YIL025C	13	4	6	12	9	4	7	5
YDR545C-A	20.066	12.186	4.062	9.284	22.794	0	9.097	0
YNR071C	26	25	42	29	56	17	22	25
YML131W	957	722	536	1219	1310	496	755	515
YNL245C	689	445	283	676	375	175	203	289
YNR024W	511	275	257.911	484.863	436	236	253.923	416.868
YFL013W-A	5.03	2.005	0	2.007	8.013	0	1	5.027
tP(AGG)N	0	0	0	0	0	0	0	0
YLR329W	33	30	13	44	21	8	18	20
YPL043W	2822.99	1755	1319	2766	2483	1187	890	1874
YCL045C	1779.99	1200	963	2023	2639	1116	1689	1653
YBR056C-B	1	1	2	2	1	0	2	4
YKL002W	877	550	550	946	1057	502	664	687
YDR328C	1170.99	699.993	928	1316	1558	744	1078.97	954.993
YIR009W	170	102	100	206	143	51	75	102
YBR154C	1661	1157	969	1963	1678	859	957	1579
YLR001C	666	556	381	685	1090	329	679	437
YAR035C-A	0	0	0	0	0	0	0	0
YKR101W	370	268	260	448	453	198	243	239
YMR230W-A	2	6	1	3	15	3	7	2
YER115C	257	162	159	253	276	121	144	193
YHR124W	84	79	75	132	174	61	92	122
YER148W	1110.99	729	672	1314.99	1260	528.989	666	1136.97
YCR050C	0	0	1.043	2	4	0	3	4
YMR240C	370	264	268	407	430	218	275	316
YOR303W	13552	10069	8056	19682	7208	3104	3935	5802
YIL087C	223	169	224	297	353	144	247	150
YMR192W	736	649	413	784	1017	414	487	487
YCL074W	0	0	0	0	0	0	0	0
YJL221C	519.921	306.047	250.774	379.932	468.745	249.753	282.635	344.883
YMR229C	3004	2469	1431	3113	3195	1414	1268	2709
YLL038C	333	195	136	302	336	189	201	246
YOR056C	2409	1446	1352	2801	1817	998	876	1940
YOL108C	167	113	126	215	247	140	206	194
YOR270C	5215	3654	2514	5857	6769	2483	3470	4128
YDR106W	22	17	15	19	38	16	17	6
YOL068C	1205	945	721	1395	1485	597	807	972
YMR182C	1779	1041	492	1759	770	259	300	459
YBR201W	446	336	305	494	544	225	331	349
YLL043W	1436	992	953	1566	1681	848	994	1124
YDR415C	327	214	235	331	475	238	351	313
YGL161C	489	337	352	538	1055	441	727	613
YOL133W	308	204	201	352	285.991	131	183	176
YDL074C	968	752	475	1004	1371	547	665	815
YNL263C	527	355	385	587	881	434	588	563
YHR217C	10.661	5.024	4.023	11.846	3.722	2.006	7.913	4.024
YDR128W	831	555	444	787	1036	464	544	508
YOR193W	223	189	117	261	269	90	134	139
YER028C	136	103	91	179	114	49	67	70
YMR052W	154	115	81	165	168	71.95	128	122
YIL029W-A	0	0	0	0	1	0	0	0
YMR294W-A	1.003	2.016	5.039	3.005	11.049	0	1.003	3.023
YKR076W	743	486	565	911	1210	374	589	420
YDR225W	2877.71	1807.39	2215.62	4186.93	5722.64	2955.12	3606.15	5446.36
YDR270W	411	405	296	555	641	232	453	290
tL(UAG)J	0	0	0	0	0	0	0	0
YPR033C	2730	1811	1584	2990	3025	1560	1797	2505
YGR230W	307	187	197	325	379	199	251	295
YPR062W	1436	798	940	1654	1595	871	988	1374
YDR528W	527	366	297	570	808	293	273	286
YER173W	391	272	231	425	519	222	249	286.983
YBR026C	1053	890	866	1512	2757	982	1539	1074
YDL185W	6656	4561	3278	7294	8595	3473	4551	4325
YBR091C	241	143	152	317	255	141	174	248
YNL094W	902	662	583	1060	1082	488	638	727
YGL056C	3319	2169	1435	3556	3425	1626	1653	2554
YPL227C	392	312	293	566	618	239	308	488
YLR222C-A	20	35	19	31	39	10	12	10
YDL010W	460.981	319	339	412	537.984	240	323.99	339
YML019W	364	233	215	351	537	215	303	353
YDL045C	594	441	430	686	733	326	432	453
YLR163C	889	572	515	962	1098	546	818	788
YLR178C	957	976	1435	1837	4248	936	2039	531
YKL225W	0	0	0	0	0	0	0	0
YHL002C-A	0	0	2.011	2.006	1.002	0	0	2
YJL175W	1	1.005	0	0	2	0	0	1.005
YBL079W	1062	896	512	1118	1638	603	818	888
YNL056W	661	420	452	712	556	283	368	468
YFL001W	670	549	393	785	660	287	313	460
YDR150W	1501	1135	813	1667	2574	990	1428	1429
YER147C-A	4.012	5	4	7.006	7	5.011	4	11.025
YKL170W	574.987	396	421	696	806.959	354.996	489.978	579
YPR157W	73	49	63	86	107	56	100	62
YPR137C-B	334.516	0	0	877.144	346.541	208.989	269.407	339.275
YLR384C	2321	1691	1106	2162	2340	1091	1242	1722
YPL060W	259	177	196	300	360	135	221	201
YML099C	838	662	460	864	871	425.968	465	550
YLR421C	733	497	505	753	930	403	545	599
YLR090W	1022	661	617	1042	1070	469	607	661
YMR325W	1.5	1.783	1.17	0	0	0	0	0
YJR064W	2249	1470	1296	2485	2794	1379	1676	2111
YML022W	1447	889	936	1786	1515	774	905	1594
YER046W	239	166	186	266	355	187	248	201
YMR029C	413	314	298	435	724	284	535	411
YIR030C	19	10	10	18	45	17	15	25
YKR050W	876	520	482	963	910	422	572	556
YMR121C	528.743	326.907	388.723	601.977	631.215	346.193	428.592	407.955
YGL017W	491	338	273	570	498	226	311	306
YDL150W	1349	802.995	664	1341	1266	588.995	651	1012.99
YNL038W	253	259	178	282	432	135	263	306
YHR001W-A	449	456	417	566	2831	836	1614	1418
YOL165C	6.213	7.739	3.11	17.149	0	1.262	1.216	1.202
YIL139C	316	240	207	361	317	104	164	202
YLR246W	424	274	299	524	713	275	385	335
YJR119C	889	690	398	917	848	286	362	426
YLR359W	1270	819	700	1752	4557	1012	1336	1183
YLR199C	822	601	525	961	1039	458	618	575
YJL206C	285	253	156	345	392	169	253	229
YIL142W	2530.99	1768.99	1547.96	2860	3231	1438	1763.98	2216.98
YGL082W	495	374	314	574	811	301	491	408
YNL138W	1147	808	919	1460	2354	1027	1426	1110
YOR133W	4960.01	2699.2	2649.74	4775.84	4616.14	2923.14	2955.13	4383.88
21S_rRNA	44	40	26	26	96	26	62	86
YGL142C	399	317	197	441	641	215	368	256
YGR179C	214	167	170	244	324	144	247	195
YGR102C	527	366	429	752	717	310	440	400
YBR139W	672	576	626	772	2757	857	1781	838
YHR188C	1623	1134	985	1717	2373	1140	1464	1439
YKL106C-A	1	2	2	3	3	3	0	1
YNL116W	553	395	364	694	782	349	502	433
YNL139C	743.763	573.226	310.46	756.12	1124.53	345.586	600.132	558.713
YDR361C	878	563	481	961	859	437	373	815
YLR445W	2	1	3	3	2	0	4	1
YGL255W	5314	3907	2822	4899	15502	6356	9856	6207
YFR007W	337	244	204	331	460	190	263	248
YLR333C	3376	1844	2059	3521.31	3798	2038	2264.27	3588
YHR103W	916	677	556	992	1579	647	970	994
YHL030W	576	448	318	604	1133	407	716	442
YGL077C	331	290	296	486	1614	863	1233	1121
YPL204W	4059	2823	1939	4414	4368	1746	2286	2407
YPL251W	4	4.028	1.004	5.039	1.01	0	2.013	4
YIL009C-A	149	119	152	201	182	87	147	152
YOR091W	1562	896	910	1684	1206	756	752	1215
YGR026W	384	409	332	566	1234	331	630	535
YAL040C	5799	4345	2356	6344	6542	2554	3183	3078
YDR288W	292	219	205	332	429	178	280	286
YGL208W	567	336	372	589	794	341	532	455
YNL284C	768	516	538	768	1194	522	786	749
YIL164C	189	93	108	214	131	59	71	84
YOL143C	1013	637	769	1214	1494	727	884	955
YBR237W	999	754	574	1037	1122	479	693	656
YBR197C	354	221	216	443	292	183	215	274
YHR147C	724	502	590	955	1169	524	749	777
YJL093C	906	609	493	970	1266	471	694	664
YPL126W	3635	2678	1537	3951	3586	1339	1359	2434
YMR317W	35	18	21	33	22	14	22	22
YOR251C	872	531	558	939	930	464	583	745
YPR181C	3386	2313	1617	3639	4417	1927	2691	2600
YCL008C	415	288	317	504	643	270	431	342
YOR107W	1366	789	636	1436	787	248	337	352
YML005W	430	328	228	514	457	188	254	298
YNL215W	533	314	342	581	570	284	370	400
YCR075W-A	167	105	148	224	255	111	163	209
YDL059C	97	80	69	123	117	64	80	96
YOR204W	4186	2530	1323	4491	3167	1121	1302	1646
YEL012W	1058	658	625	957	1312	529	794	684
YBL040C	587	541	488	751	1303	397	790	686
YPR043W	5936.55	3040.4	3642.93	6408.62	7496.17	4115.01	4906.38	7329.79
YDR382W	5939	3313	3635	6757	7134	3588	4016	6815
YDR483W	3891	2487	2223	4674	5122	2025	2651	2922
YER061C	443	277	244	563	614	184	297	262
YLR022C	500	346	315	600	434	221	265	413
YLR402W	100	51	40	118	125	42	61	45
YLR073C	589	400	357	753	481	291	219	620
YER183C	281	161	187	334	332	156	253	299
YHR090C	466	334	288	555	574	220	266	353
YOL021C	2414	1474	982	2274	2159	993	1009	1454
YHR030C	3572.85	2718	2544	4470	3588	1459	1839	2029
YBR295W	1400	919	689	1421	987	490	520	683
YKL018W	384	265	249	503	498	184	281	344
YIL011W	122	85	64	182	98	39	70	63
YEL034W	6926.76	5356.88	6533.81	9063.84	11920.8	6970.88	8936.88	11706.9
YHL015W	7736	4267	4298	8563	9841	5272	6468	9084
YNR050C	1653	872	803	2672	698	433	495	1441
YDR134C	2068.58	1494.56	1405.93	2993.89	4422.32	1246.07	2107.8	2050.94
YKL208W	289	176	203	393	391	180	247	266
YGR004W	195	137	140	206	277	114	180	194
YML110C	1661	1159	1209	2180	2419	1061	1466	1459
YGL048C	1813	1159	1121	1980	2466	1123	1659	1504
YGL243W	354	262	236	399	299	119	199	241
YKL106W	651	464	326	834	573	259	307	383
tN(GUU)N1	29	12	17	19	9	8	15	13
YPR029C	911	716	464	938	1360	502	799	776
YJL034W	23907	17479	12456	23211	17046	7789	9527	12806
YFL048C	906	723	559	1099	1284	595	810	931
YLR117C	779	575	414	825	944	396	579	577
YOR176W	815	562	531	994	1668	544	913	905
YOR109W	1126	877	637	1237	1498	557	847	741
YBL089W	334	259	195	400	416	141	274	243
YDL084W	2618	1956	1909	3148	4552	1910	2613	3053
tC(GCA)Q	0	0	0	0	0	0	0	0
YGL116W	394	292	229	419	737	361	564	514
YNR034W-A	1330	992	1467	2252	7931	1237	3352	1108
YCR024C	460	422	287	536	545	197	334	304
YIL102C-A	125	145	74	153	117	49	66	82
YMR102C	1847	1150	925	2310	952	400	595	505
YCR071C	549	340	363	644	674	327	422	492
YDR175C	810	543	521	921	1083	499	642	708
YOR189W	313	153	231	303	315	149	190	222
YOR154W	460	392	239	529	685	235	368	484
YPR121W	555	395	277	596	548	290	311	287
YBR070C	349	254	319	493	442	263	344	384
YOR396C-A	0	0	0	0	0	0	0	0
YLL017W	19	7	9	15	16	6	12	6
YDR351W	1326	1080	721	1417	1781	675	880	991
YNL315C	861	559	638	1013	1152	527	761	862
YPR174C	423	254	252	506	373	193	204	285
YJR045C	12214	8788	7676	13981	14326	6249	9227	8404
YMR008C	3470.61	2583	1912	3423.75	5088	1721	3002.59	2063
YDR349C	1844	1342	1140	2074	2085	910	1294	1484
YDL171C	2467	1754	1088	2206	2457	1230	1746	1637
YKL062W	2498	1779	1162	2660	2479	874	1370	920
YJR010W	298	214	179	309	605	405	475	362
YJL218W	56	35	62	70	129	69	115	90
YIL126W	1576	1148	778	1702	1996	918	1046	1178
YDR093W	906.208	607.647	448.887	867.183	1086.36	570.296	671.458	839.331
YMR282C	458	333	286	457	962	361	574	552
YIL109C	5347	4233	2646	5529	5109	2296	3001	3076
YFL022C	3807	2402	2010	4378	3749	1991	2284	3107
YPL109C	279	211	146	286	559	169	429	269
YJL156C	687	548	364	768	770	358	447	512
YNL071W	2802	1956	1964	3600	5281	2406	3093	2934
YMR088C	642	500	414	757	1093	459	632	724
YGR211W	2178	1347	1151	2374	1893	1003	950	1625
YKL139W	651	532	417	702	901	309	422	531
YJL069C	1533	1114	826	1717	1710	685	645	1161
YDR323C	141	157	131	209	261	105	201	178
YDR344C	9	9	4	13	9	4	8	10
YJL016W	907	836	589.86	1100	1716	494	945	497.957
YDR444W	659	468	396	694	877	473	568	699
YPL189W	99	85	65	110	74	43	45	47
YLR285W	488	398	266	561	630	343	361	473
YLR267W	235	183	129	261	228	81	90	93
YDL219W	309	205	252	313	449	180	301	324
YNL017C	6	9	4	6	3	2	0	2
YCR024C-A	766.47	750.487	603	1331.41	1552.97	444.515	741.44	958.543
YCR024C-B	847	967	683	1663	1959	484	1019	1296
YKR024C	1834	1239	855	1899	1518	686	553	1214
YBR156C	502	375	262	577	466	310	320	394
YOR076C	313	278	153	357	560	175	300	219
YEL059C-A	265	154	171	284	218	104	141	163
YDR405W	1551	920	950	1762	1475	757	850	1056
YOL091W	92	117	56	134	112	50	51	44
YCL031C	1078	905	583	1213	1422	529	663	867
YIL027C	180	163	132	243	465	130	238	273
YLR459W	287	266	185	346	543	173	268	292
YNL243W	2241	1538	1308	2442	3217	1621	2176	1862
YNR026C	1347	827	590	1487	1055	438	484	703
YHL044W	45	52	50	66	66	28	47	25
YPR204W	5748.61	3696.51	3315.04	5202.62	5422.34	3058.82	3498.49	3704.82
YNL297C	571	586	315	639	1215	352	636	484
YBR170C	752	476	466	693	921	447	559	525
YGR149W	326	399	281	428	1208	330	704	456
YDR458C	709	561	382	665	1048	362	590	522
YKL193C	452	443	433	741	1278	329	659	498
YPR099C	16.118	4.014	1.01	15.029	14.094	6.075	7.14	7.074
YOR135C	2.012	1	0	2.01	1	1.002	1.005	0
YLR310C	1429	1194	664	1440	2259	825	1235	1162
YNR008W	577	434	385	695	793	304	493	330
YJR150C	9	4	10	18	10	6	5	6
YBR301W	1.302	6.553	4.729	9.542	3.004	0	4.237	1.188
YLR003C	655	567	339	819	681	303	330	587
YER113C	587	447	334	566	870	361	503	497
YHR122W	657	384	415	697	616	343	382	595
YHL017W	552	414	371	660	929	359	479	450
YJR010C-A	112	103	97	176	256	107	135	165
YIL085C	1008	639	604	956	1062	468	561	649
YMR190C	642	417	294	642	676	357	440	443
YLR325C	5344	2914	3561	5669	6410	3690	3903	6208
YCL076W	0	0	0	0	0	0	0	0
YOR272W	1725	1172	887	1920	1655	826	725	1484
YOR058C	509	452	270	509	608	209	396	345
YER172C-A	0	0	0	0	2	0	0	1.017
YAL064W-B	40	25	13	30	48	24	25	25
YDR413C	4.008	2.006	1.01	2.012	8.072	0	4.015	6.043
YBR203W	2080	1840	1056	2070	2331	833	1219	850
YAR029W	23	14	12	16	41	16	27	21
YNL238W	1724	1188	928	1822	1703	830	1012	1117
YJL198W	2038	1437	922	2066	1835	773	743	1546
YOL135C	278	182	177	350	278	126	150	224
YOR323C	1397	913	894	1566	1717	999	1132	1440
YLL041C	1783	1241	1129	1796	9066	4007	6299	4891
YKR074W	465	346	439	634	1080	359	714	623
YMR274C	70	58	70	105	142	49	87	102
YER026C	402	268	294	472	1824	899	1376	1189
YMR201C	382	282	268	463	455	207	293	349
YLR069C	2002	1496	1231	2240	2715	1230	1764	1587
YML042W	490	405	256	472	1040	324	579	307
YMR050C	1911.47	1058.99	211.985	2344.1	1017.29	396.433	489.679	466.893
YDR069C	436	477	283	513	736	263	468	358
YOR298W	44	29	20	59	54	13	12	33
YEL066W	685	361	491	768	867.97	571	626	809
YPR035W	21681	13389	10530	25432	25833	10153	9614	14601
YDR014W	205	195	101	256	287	103	132	137
YDR227W	871	632	406	871	1093	439	607	649
YPR060C	447	349	288	503	483	245	245	400
YMR037C	1022	817	523	1176	1364	495	825	569
YCR038C	224	175	170	303	283	93	227.23	171
YNL257C	358	306	251	427	735	319	528	352
YCR072C	1620	947	736	1569	1392	681	459	1004
YBR093C	1530.78	1191.52	1247.83	1471.7	3389.38	2036	2445.63	2013.04
YNL092W	130	97	116	170	259	78	161	65
YGR045C	5	4	6	7	23	5	5	15
YAL037C-B	11.016	11.025	17.047	9.013	61.096	15.051	9.022	32.075
YLR134W	150.213	131.14	134.199	200.268	260.315	132.185	179.298	147.201
YOR218C	0	0	1.008	0	2	0	0	0
YMR203W	2424	1667	1421	2671	3491	1555	2048	2313
YKL096C-B	5	3	6	6	6	2	3	1
YPL225W	1180	836	1056	1464	2334	852	1406	1345
YPL270W	823	603	528	880	1447	591	927	785
YDL012C	398	265	314	447	460	284	342	419
YDR218C	306	214	223	350	227	72	158	184
YLR299W	1563	1043	887	1757	2032	721	1045	900
YFL003C	102	93	87	124	85	38	61	67
YPL051W	329	171	187	352	312	140	179	230
YNL054W	880	636	451	911	1008	417	658	658
YDR156W	649	397	382	773	630	290	334	531
YPL062W	3	2	3	2	3	1	0	1
YPR155C	257	217	166	310	748	254	511	334
YOR137C	414	391	304	470	752	204	395	244
YKL123W	106.135	77.114	79.46	122.462	185.756	79.48	98.48	79.13
YKL172W	2538	1495	1368	2832.84	2291	1146	1021	2043.84
YNL336W	668.282	518.322	436.338	759.946	741.062	253.982	484.714	396.566
YDR305C	173	119	154	238	367	125	241	179
YJL057C	653	520	444	744	1000	301	650	305
YPR100W	826.882	560.986	753.99	1029.97	1238.91	624.925	818.86	898.926
YDR358W	457	349	312	506	1131	320	768	296
YJL152W	21.013	3.007	7.01	7.007	19.009	7.032	9.034	10.007
YLR096W	1227	897	564	1276	1426	601	670	847
YDR194W-A	0	0	0	0	0	0	0	0
YKR052C	176	133	97	200	283	129	194	132
YLR427W	891	635	487	897	1000	422	543	598
YDL152W	3.02	3	0	8.031	2	2	2	3.028
YGL015C	14	15	8	22	11	12	6	13
YEL064C	188	168	114	193	389	141	182	177
YMR127C	385	289	241	426	437	192	204	348
YIL140W	1504	1071.5	950	1841.87	2407.15	1280.86	1653.81	1652.9
YOL163W	54	38	42	100	46	13	30	25
YLR197W	4185	3003	2217	4543.97	4507.97	2175.96	2179	3996
YBR213W	244	173	174	292	199	150	125	206
YAL064W	5	6	6	2	15	1	2	3
YJL204C	239	247	174	296	393	127	218	202
YLR244C	2566	1719	1494	2936	2162	1082	1199	1712
YJR084W	439	275	262	457	460	203	316	278
YLR233C	256	241	175	350	475	165	284	252
YDL238C	218	143	131	236	330	109	236	93
YGL084C	398	362	251	486	920	342	572	457
YLR382C	1425	1086	669	1485	1563	740	975	925
YLR154C-H	2	4	3	9	5	0	1	6
YLR154C-G	363.243	188.566	219.392	401.828	302.887	107.886	158.763	164.861
YGR238C	336	224	228	361	537	281	427	307
YDR363W	627	450	322	639	686	263	366	435
YNL114C	47.302	42.072	15.143	38.073	37.38	15.108	11.026	37.252
YNL163C	2680	1795	1046	3065	2174	937	922	1610
snR55	1	1	5	1	4	0	1	1
snR54	3	4	2	5	12	2	1	2
snR57	5	10	5	11	14	2	3	5
snR56	0	1	0	1	0	0	0	0
YHR009C	1348	807	981	1595	1945	938	1016	1381
snR50	9	21	14	21	22	8	8	19
snR53	0	0	0	1	1	0	0	0
snR52	0	0	0	2	2	0	0	0
YFR050C	1317	1030	927	1595	2230	1005	1402	1413
snR58	0	0	0	0	1	0	0	0
YLR331C	4.025	2	8	17.092	4	2.019	2.068	2.025
YNR069C	192	141	111	219	264	118	170	115
YOL058W	1874	1129	771	1970	4343	1913	2441	2464
YAR019C	544	408	276	548	756	301	517	267
YOR024W	3	1	1	2	4	1	1	0
YML129C	556	368	426	594	724	348	451	465
YGL257C	492	414	247	556	647	271	389	517
YGR020C	1448	897	1104	1756	1949	878	1193	1444
YOR093C	455	441	258	498	805	272	525	384
YAL046C	321	228	290	448	511	290	333	447
YOR392W	27	23	25	40	20	5	12	2
YAL039C	4923	2945	2942	6047	3926	1868	2558	3049
YGR100W	957	829	546	1002	1482	527	778	613
YLR403W	1833	1339	808	1836	2028	708	1181	983
YOL118C	16	13	8	23	25	12	9	9
YDR286C	232	168	212	281	214	98	147	162
YHR141C	6069.98	2929.84	3635.62	6057.71	7683.06	3888	4782.76	7523.65
YPL128C	572	377	294	557	775	317	444	417
YJL091C	285	276	190	317	591	161	375	285
YBR191W	5757.19	3445.88	3563.27	7047.91	7950.17	4200.2	4909.23	7545.89
YDR380W	2205	1858	1768	2820	1153	453	841	1392
YGR191W	3146.99	2103.99	1443.99	3496.99	3296	1100	1329	2040
YGR047C	727	556	398	739	1044	436	483	526
YDR485C	1163	880	654	1294	1259	634	664	743
YPL239W	1132	645	701	1246	971	542	588	890
YPR183W	2489	1411	1619	2777	2911	1592	1774	2200
YOR206W	2299	1844	1024	2447	2794	1036	1117	1864
YEL049W	108.767	72.012	80.868	154.988	105.56	49.603	75.123	66.119
YOR391C	111.548	137.408	168.48	236.914	251.647	110.506	117.329	47.281
YDR525W-A	210	208	124	205	370	106	162	154
YBR089W	0	0	0	2.003	2.002	0	2.005	2.011
YLR075W	23337	12003	13346	24806	23277.9	12683	14281	22111.9
YBR054W	3027	2351	2791	4083	10742	3534	6951	3306
YLR020C	664	498	400	712	897	323	470	590
YNL217W	477	324	345	551	900	415	572	613
YLR404W	147	91	114	175	189	82	111	145
YLR154W-A	2	0	0	0	5	1.103	0	1.059
YIL013C	387	305	208	465	273	117	164	194
YPL206C	1084	732	801	1188	1602	667	967	931
YDL060W	2546	1583	1169	2591	1980	1053	892	1765
YBR293W	518	369	297	552	601	240	331	384
YNR052C	889	638.797	534.546	990.344	1293.38	590	720.431	746.507
YHR032W	1437	915	731	1729	1154	624	643	941
YEL032W	2406	1437	973	2000	1921	955	858	1149
YOL076W	290	285	185	324	614	190	352	329
YDR136C	2	1	0	2	5	2	1	1
YHR203C	10840.3	5861.27	6339.11	11421	12687.2	7211.77	7931.51	11087.6
YJL136W-A	0	0	0	0	0	0	0	0
YML112W	399	256	254	453	430	225	230	285
YLR154W-C	18.093	7.081	10.1	20.164	26.147	5.081	8.111	8.077
YGL241W	366	295	281	451	617	259	332	293
YDL071C	4	9	5	13	7	4	9	12
YPR176C	458	292	337	517	513	276	412	444
tS(UGA)Q2	0	0	0	0	0	0	0	0
YDR057W	705	531	379	688	1018	383	588	600
YJL036W	619	478	377	652	912	385	632	413
YDR521W	0	0	0	0	1.041	0	1	1
YER009W	1505	1165	1103	1891	2587	1096	1540	1905
YLR115W	781	572	379	788	909	388	551	617
YLR140W	1.233	1	1.171	3.91	0	1.155	0	1.098
YGL114W	1095	745	573	1103	1246	593	797	681
YER167W	2142	1580	1146	2444	2420	1065	1224	1430
YMR104C	2736	2158	1522	2712	3045	1832	2785	1648
YER185W	87	83	59	129	95	35	34	45
YDL195W	2609	1954	1163	2516	4520	1904	2800	1896
YNL199C	990	730	625	1098	1241	676	833	1107
YCR026C	1674	1168	855	2047	1810	731	1009	973
YBL052C	422	356.76	317	556	725	293	383	444.916
YBR076W	36	37	27	55	86	21	36	27
YNL317W	607	455	362	675	798	338	452	443
YLL019C	1904.61	1507.49	787.556	1819.6	3065.94	1106.42	1879.53	1334
YOR156C	367	262	188	380	366	196	235	243
YHR052W	2216	1786	1210	2641	2320	993	928	1917
YKR026C	692	511	426	815	696	351	404	646
YJR043C	447	260	249	438	428	206	237	353
YJR012C	168	114	156	194	182	74	164	144
YKL060C	69635	38157	45131	80733	81582	38651	51434	55064
YCR044C	277	211	196	365	444	227	331	330
YKL035W	1092	872	925	1431	5719	1390	2771	974
YLR264C-A	2	2	4	3	1	0	2	0
tQ(UUG)B	0	0	0	0	1	0	0	0
YNL073W	2036	1374	1284	2209	2611	1123	1879	1443
YMR280C	529	441	272	538	1245	548	986	567
tQ(UUG)L	1	0	0	2	0	1	0	0
tQ(UUG)Q	0	0	0	0	0	0	0	0
YFL020C	57	43	55	77.706	66	29	52	30
YNL328C	59	33	34	62	75	25	43	46
YJL014W	2029	1414	1126	2277	2532	1357	1538	1959
YMR031C	1150	799	568	1035	4195	1131	2182	954
YOR174W	447	294	314	543	541	273	335	393
YPR149W	1236	1053	1184	2141	5940	1493	3897	1552
YNL015W	1900	1442	1655	2736	5781	2591	3516	3207
YCR084C	2040	1410	1105	2319	2919	1516	2021	2039
YHR178W	355	287	270	507	446	215	358	285
YHL050W-A	0	0	0	0	0	0	0	0
YDR260C	268	153	147	305	266	146	161	202
YLR283W	243	186	179	294	286	134	195	152
YPL170W	1114	725	893	1320	1089	553	796	846
YPR001W	328	199	146	318	176	98	122	114
YDR204W	322	246	264	426	655	280	458	298
YBR085C-A	2227	1838	2238	3172	3455	1295	2233	1404
YDR251W	1273	1138	675	1333	2287	798	1291	946
YNL048W	441	369	268	506	905	363	551	562
YML057C-A	9.103	5	1	2.009	3.02	0	1	1.01
YOR074C	435	293	377	583	568	381.953	412	421.9
YPL028W	2368	1836	1897	2790	3867	2089	2887	3227
YJR152W	422	331	238	465	418	173	263	187
YKL025C	535	478	380	596	1010	369	592	473
YAR008W	272	158	183	279	368	174	184	272
YOR003W	279	245	231	330	451	138	217	180
YOL097C	1646	969	1048	1903	1431	982	981	1453
YOR110W	532	369	334	540	657	274	357	356
YDR407C	640	631	342	736	1080	418	708	530
YNR020C	360	242	252	484	431	222	226	348
YBR258C	201	140	154	225	182	91	129	141
YNL146W	12	15	13	14	42	13	14	7
YFR019W	902	773	506	1122	1266	481	668	693
YLR262C-A	1321	603	930	1279	1535	768	995	1341
YIL115W-A	0	1.016	0	0	0	0	0	1.031
YBR223C	464	277	220	465	446	213	297	222
YNL241C	3590	2468	2617	4261	6454	2570	3916	2811
YJL154C	1233	996	694	1453	1695	579	833	771
YDR091C	2371	1905	1143	2578	2757	1099	1432	2021
YJL123C	1822	1203	1183	2139	2166	1141	1310	1653
YHR066W	2058.68	1375.32	969.285	2114.03	1948.77	848.222	833.458	1464.57
YPL047W	271	168	154	315	240	98	149	165
YER086W	4246	2613	1982	5168	3390	1742	1840	2844
YLR287C-A	5607.42	3058.86	3823.84	6076.78	6741.83	3270.68	4056.43	5983.84
RPR1	7	6	6	5	12	1	2	7
YBR176W	309	228	203	350	359	164	215	213
YDR207C	647	476	350	816	624	389	441	514
YKL125W	1060	865	569	1043	1466	496	630	637
YDR373W	648	399	464	806	765	310	545	658
YGL238W	1023	1025	602	1166.99	1812	557	998	809
YLR190W	878	616	490	908	1833	890	1125	1285
YNL128W	117	79	75	111	80	43	48	41
YLR312C	785	509	482	804	1366	403	785	519
YKL191W	1652	971	858	1670	1544	878	955	1400
YNR006W	1186	884	717	1270	1335	670	865	747
YHR120W	495	361	267	470	619	260	306	447
YAR050W	337.755	270.436	138.488	214.838	584.132	203.779	195.696	92.599
YOL137W	441	357	294	477	667	266	369	425
YDR530C	456	365	315	535	643	304	426	439
YER111C	426	359	261	435	916	327	466	408
YER144C	1411	1109	734	1761	1476	585	799	830
YOL039W	4617.28	2410.82	2727.41	4863.61	5838.61	3174.36	3564.65	5789.41
YIL083C	527	434	287	529	780	307	490	512
YHL011C	3479	2274	1867	4080	2683	1248	1408	2461
YFR010W-A	1.109	0	0	0	1.022	1.053	1.043	0
YGR184C	1485	1310	794	1413	1951	757	1059	975
YMR303C	522.555	350.697	205.331	938.968	599.637	374.295	362.906	741.722
YDR307W	270	229	192	326	545	186	310	219
YDR411C	690	492	404	754	1002	364	643	498
YBR205W	764.28	492.412	511.96	866.459	1074.47	488.317	645.994	680.502
YOR321W	589	422	411	624	832	337	476	423
YMR186W	5902.73	4620.55	5319.48	6801.51	7419.39	3463.43	5951.85	5161.07
YMR278W	956	743	599	1069	988	361	643	437
YLR136C	75	68	65	152	72	41	38	40
YGL260W	0	0	0	0	0	0	0	0
YMR207C	636	480	317	620	625	359	408	446
YML015C	551	415	353	703	773	321	440	489
YOR197W	1372	935	925	1456	1920	902	1166	1199
YKR089C	934	666	499	867	1817	714	1151	696
YDL041W	2	6	1	7.217	3.029	3	0	0
YKR072C	2056.2	1293.17	1034.8	2043.93	2425.03	1057.4	1166.89	1461.75
YDL014W	6497	3949	3213	7184	5464	2941	2844	5119
YML040W	0	0	0	0	0	0	0	0
YJL127W-A	0	0	0	0	0	0	1	1
YER079W	259	193	187	355	583	146	361	195
YER024W	988	812	443	789	955	356	633	506
YOR230W	6777	4818	4204	7195	9193	3379	5047	3554
YGR234W	4961	3889	3532	4408	22391	15189	17828	24083
YMR178W	459	336	342	556	806	295	468	417
YPR037C	710	417	467.993	729	869.994	394.989	495.996	609.993
YEL068C	133	90	114	170	178	106	134	135
YNL090W	219.983	147	196	260.987	310	223	255.971	342
YOR307C	583	489	355	704	715	266	356	445
YMR225C	679	446	461	792	692	371	441	564
YBR095C	573	427	370	567	768	379	412	472
YDR036C	1022	747	569	1130	1277	588	704	795
YGR043C	729	684	801	1328	1520	241	565	234
YPL223C	542	492	722	2620	236	55	83	92
YPL272C	205	152	118	187	551	188	294	247
YPR002C-A	72.791	72.954	39.477	56.277	77.424	16.182	38.363	48.319
YOL002C	842	679	431	1204	1412	425	539	911
Q0032	0	0	0	0	0	0	0	1
YEL032C-A	0	0	0	0	0	0	0	0
YFL005W	1178	813	902	1368	1853	735	1105	1201
YCR010C	20	16	13	20	14	6	13	18
YMR152W	459	385	381	613	1132	347	647	390
YDR154C	3663.2	2750.73	3689.98	6134.31	5365.47	2536.63	3872.41	4024.57
YMR125W	1131	1025	658	1218	1927	648	955	1078
YJR031C	551	443	338	591	725	315	380	408
YCL026C-A	10	10	13	16	15	10	9	19
YCL026C-B	285	258	256	353	474	284	371	266
YGR118W	6244.54	3264.14	3885.53	6812.36	7341.69	3938.89	4696.37	7086.75
YJL055W	1362	923	1116	1664	2235	1124	1654	1416
YPR102C	7010.59	3459.94	4150.67	7316.32	7602.52	4659.6	4776.43	7802.3
YNL334C	238.769	156.748	158.239	317.236	303.587	127.446	198.634	192.813
YGL123W	15758.9	8419.89	8708.92	17680	18561.7	10298	11516	17801.8
YPL064C	659	431	427	709	646	305	393	504
YPL086C	996	711	567	1082	967	500	522	808
Q0250	1	3	2	2	13	2	10	2
YPR153W	145	124	64	177	118	49	66	77
YMR042W	410	234	219	442	280	151	163	237
YLL003W	714	605	453	790	875	362	489	452
YER042W	199	167	189	269	516	214	315	245
YDR109C	717	524	431	875	760	350	387	480
YDR221W	508	402	406	664	665	292	435	429
YLR109W	7324	5898	6825	14627	7226	2803	4762	4217
YKR009C	361	284	205	434	1469	445	856	420
YMR078C	562	408	383	640	616	346	364	449
YLR094C	1256	841	738	1198	1548	780	922	958
YBR037C	450	268	324	524	898	316	487	398
YLR041W	30	26	14	26	25	14	17	18
YJR060W	233	138	178	266	234	122	206	161
YNL161W	1310	990	758	1444	1599	845	1103	996
YIL146C	599	442	264	715	752	235	359	279
YLR195C	821	627	499	973	937	428	555	642
YJL202C	0	1.017	0	0	2.026	0	0	2
YAL066W	1	0	0	1	0	0	0	0
YCR081C-A	0	0	1	0	1	0	0	0
YLR231C	561	384	366	595	747	318.93	528	483
YKL016C	1330	984	958	1549	6461	3002	4283	4102
YPL111W	439	297	447	591	867	600	782	1264
YKL174C	587	478	358	692	859	303	422	576
YKL121W	659	597	359	661	1012	351	638	406
YLR380W	1144	676	659	1349	1313	675	750	916
YOR142W-B	10138.4	7645.32	3907.86	8355.15	8453.73	3350.8	5391.89	4782.09
YMR012W	3146	2549	1515	3267	6275	2529	3319	3461
YER093C	809	613	375	740	1067	359	472	523
YOR032W-A	9	5	5	15	16	4	9	7
YDL201W	1060	673	517	1075	824	435	445	800
YDR468C	589	379	385	703	838	344	532	553
snR73	1	1	2	6	3	2	0	3
snR72	0	2	0	2	6	0	1	1
snR71	3	4	3	6	2	1	1	0
snR70	49	30	44	47	26	6	23	28
snR77	5	6	6	12	8	0	3	6
snR76	85	37	49	74	97	29	46	79
snR75	7	1	1	6	7	2	3	3
snR74	0	5	1	2	3	0	1	3
YFR003C	250	167	197	321	548	188	290	208
snR79	0	6	0	3	3	0	0	0
snR78	0	2	1	1	1	0	3	0
YIL033C	2311	1656	1621	2833	4322	1662	2382	1986
YOR368W	244	207	175	249	342	142	202	206
YGR128C	1234	1222	699	1449	1528	606	690	1188
YIL048W	812	689	383	853	1338	418	752	544
YIL142C-A	2.008	1.009	3.044	6	3	0	3.019	4.021
YLR337C	1367.95	1080.97	700.993	1397	1952	796	1166	707.988
YOL056W	216	170	156	282	258	146	142	251
YFR052W	932	771	701	1133	1513	594	1038	941
YGR088W	368	425	422	794	6015	712	2201	223
[truncated: 4,845 more rows]
