# Supplementary material for: Cytosolic aggregation of mitochondrial proteins disrupts cellular homeostasis by stimulating the aggregation of other proteins
Source: bioRxiv preprint, doi:10.1101/2021.05.02.442342, version 2 (2021-07-09)
Supplement: Supplementary file 1 [file 442342_file20.xlsx]

## Sheet: 1h
gene_id	gene_name	brief_description	log2FC(pam16-3-1h/WT-1h)	FDR	Type	log2FC(WT1h/WT0h)	FDR_HSR	Type_HSR
YGR296C-B	YGR296C-B	Dubious open reading frame	-0.65365	0.840349	Not-significant	6.17016	9.32809e-07	Up-regulated
YOL152W	FRE7	Putative ferric reductase with similarity to Fre2p	-0.735744	0.570314	Not-significant	4.86033	2.08752e-17	Up-regulated
YOL047C	YOL047C	Protein Involved in spore wall assembly	0.107264	0.948944	Not-significant	4.73061	2.44838e-14	Up-regulated
YGR273C	YGR273C	Putative protein of unknown function	-0.842961	0.73664	Not-significant	4.46686	0.00508195	Up-regulated
YLR214W	FRE1	Ferric reductase and cupric reductase	-0.194537	0.707228	Not-significant	4.36806	3.92384e-83	Up-regulated
YKR093W	PTR2	Integral membrane peptide transporter	-0.378728	0.334365	Not-significant	4.16678	1.51708e-40	Up-regulated
YMR244W	YMR244W	Putative protein of unknown function	-0.230892	0.82267	Not-significant	4.09778	6.93094e-19	Up-regulated
YML066C	SMA2	Meiosis-specific prospore membrane protein	0.929515	0.496269	Not-significant	4.06282	0.00571004	Up-regulated
YOR072W-B	YOR072W-B	Putative protein of unknown function	-0.109901	0.982735	Not-significant	3.77304	0.0447651	Up-regulated
YNL141W	AAH1	Adenine deaminase (adenine aminohydrolase)	-0.150541	0.680308	Not-significant	3.62028	2.17343e-107	Up-regulated
YDL039C	PRM7	Pheromone-regulated protein	-0.101912	0.882917	Not-significant	3.5915	2.2897e-53	Up-regulated
YDL037C	BSC1	Protein of unconfirmed function	-0.0361829	0.974064	Not-significant	3.56977	5.39465e-26	Up-regulated
YDR222W	YDR222W	Protein of unknown function	-0.13102	0.839587	Not-significant	3.55491	1.26289e-59	Up-regulated
tD(GUC)N	tD(GUC)N	Aspartate tRNA (tRNA-Asp), predicted by tRNAscan-SE analysis	-1.33768	0.147147	Not-significant	3.48699	0.000187014	Up-regulated
YNL065W	AQR1	Plasma membrane transporter of the major facilitator superfamily	-0.305294	0.32384	Not-significant	3.44606	5.06001e-51	Up-regulated
YCL036W	GFD2	Protein of unknown function	-0.154656	0.574818	Not-significant	3.4199	1.53614e-102	Up-regulated
YHR126C	ANS1	Putative GPI protein	0.0316622	0.990743	Not-significant	3.38356	1.86594e-06	Up-regulated
YBL039C-A	YBL039C-A	Dubious open reading frame	-1.24679	0.833677	Not-significant	3.35301	0.0175702	Up-regulated
YER085C	YER085C	Putative protein of unknown function	-0.192555	0.882796	Not-significant	3.3519	4.32531e-06	Up-regulated
YOR338W	YOR338W	Putative protein of unknown function	-0.0260302	0.971334	Not-significant	3.34345	2.22934e-92	Up-regulated
YNL332W	THI12	Protein involved in synthesis of the thiamine precursor HMP	-0.212585	0.684265	Not-significant	3.34248	2.27841e-29	Up-regulated
YGL170C	SPO74	Component of the meiotic outer plaque of the spindle pole body	0.352593	0.7222	Not-significant	3.29119	7.18276e-06	Up-regulated
YDR218C	SPR28	Sporulation-specific homolog of the CDC3/10/11/12 family of genes	-0.21752	0.862643	Not-significant	3.26331	6.45505e-07	Up-regulated
YKR061W	KTR2	Mannosyltransferase involved in N-linked protein glycosylation	-0.190311	0.693194	Not-significant	3.26095	7.79346e-66	Up-regulated
YPR077C	YPR077C	Dubious open reading frame	0.149654	0.891189	Not-significant	3.25081	2.1483e-08	Up-regulated
YHR092C	HXT4	High-affinity glucose transporter	-1.03148	0.00161511	Down-regulated	3.23921	3.9031e-15	Up-regulated
YBR072W	HSP26	Small heat shock protein (sHSP) with chaperone activity	0.89204	2.46202e-07	Significant	3.23217	5.83579e-65	Up-regulated
YLL046C	RNP1	Ribonucleoprotein that contains two RNA recognition motifs (RRM)	-0.02472	0.985463	Not-significant	3.22949	7.16294e-09	Up-regulated
YDL071C	YDL071C	Dubious open reading frame	-0.476757	0.873296	Not-significant	3.2273	0.0292567	Up-regulated
YDR317W	HIM1	Protein of unknown function involved in DNA repair	-0.0613063	0.958242	Not-significant	3.12971	1.10703e-11	Up-regulated
YOR102W	YOR102W	Dubious open reading frame	0.254149	0.921634	Not-significant	3.10707	0.0168722	Up-regulated
YFR012W	DCV1	Protein of unknown function	-0.0676062	0.974064	Not-significant	3.09768	0.00113268	Up-regulated
YGL158W	RCK1	Protein kinase involved in the response to oxidative stress	0.284466	0.753081	Not-significant	3.08934	6.55272e-11	Up-regulated
YER148W-A	YER148W-A	Dubious open reading frame	-0.938874	0.750432	Not-significant	3.07783	0.0446421	Up-regulated
YMR141C	YMR141C	Dubious open reading frame	-0.581688	0.682091	Not-significant	3.01142	0.000219009	Up-regulated
YPL033C	SRL4	Protein of unknown function	-0.231611	0.914698	Not-significant	3.00054	0.000135471	Up-regulated
YFL058W	THI5	Protein involved in synthesis of the thiamine precursor HMP	0.0452024	0.962099	Not-significant	2.97511	4.46048e-09	Up-regulated
YBR105C	VID24	GID Complex regulatory subunit	0.0581821	0.950778	Not-significant	2.95994	1.33078e-31	Up-regulated
snR67	snR67	C/D box small nucleolar RNA (snoRNA)	0.0571257	0.987808	Not-significant	2.9388	0.0219027	Up-regulated
YBL054W	TOD6	PAC motif binding protein involved in rRNA and ribosome biogenesis	-0.170337	0.246942	Not-significant	2.91743	1.08133e-86	Up-regulated
YKL029C	MAE1	Mitochondrial malic enzyme	-0.232376	0.574818	Not-significant	2.89548	1.17267e-37	Up-regulated
YAR075W	YAR075W	Non-functional protein with homology IMP dehydrogenase	-0.748508	0.742301	Not-significant	2.86477	0.0214425	Up-regulated
YGL015C	YGL015C	Putative protein of unknown function	0.0143546	0.997024	Not-significant	2.85212	0.00728677	Up-regulated
YDR034W-B	YDR034W-B	Predicted tail-anchored plasma membrane protein	1.34348	1.32944e-06	Up-regulated	2.85136	7.68477e-21	Up-regulated
snR62	snR62	C/D box small nucleolar RNA (snoRNA)	-0.271067	0.82215	Not-significant	2.84227	6.66271e-06	Up-regulated
YOR381W-A	YOR381W-A	Putative protein of unknown function	-0.828058	0.626339	Not-significant	2.82835	0.010432	Up-regulated
snR7-S	snR7-S	U5 spliceosomal RNA (U5 snRNA), short form	-1.39033	0.468501	Not-significant	2.78186	0.0036047	Up-regulated
YMR120C	ADE17	Enzyme of 'de novo' purine biosynthesis	0.239406	0.490511	Not-significant	2.76677	4.156e-30	Up-regulated
snR54	snR54	C/D box small nucleolar RNA (snoRNA)	0.00137733	0.999766	Not-significant	2.74996	0.0299795	Up-regulated
YPR078C	YPR078C	Putative protein of unknown function	0.592714	0.516177	Not-significant	2.74733	3.33895e-05	Up-regulated
YOR306C	MCH5	Plasma membrane riboflavin transporter	0.300559	0.646069	Not-significant	2.74005	1.70815e-26	Up-regulated
YBL042C	FUI1	High affinity uridine permease, localizes to the plasma membrane	0.164045	0.62389	Not-significant	2.72579	2.89263e-65	Up-regulated
YDR055W	PST1	Cell wall protein that contains a putative GPI-attachment site	0.468345	0.0127745	Significant	2.7139	2.10432e-87	Up-regulated
YDR399W	HPT1	Dimeric hypoxanthine-guanine phosphoribosyltransferase	-0.012272	0.98854	Not-significant	2.65808	4.59104e-23	Up-regulated
YOR378W	YOR378W	Low affinity NH4+ transporter	-0.678921	0.319823	Not-significant	2.64888	2.90262e-05	Up-regulated
YIL053W	RHR2	Constitutively expressed DL-glycerol-3-phosphate phosphatase	0.143225	0.862643	Not-significant	2.63673	2.42374e-10	Up-regulated
YJL114W	YJL114W	Retrotransposon TYA Gag gene co-transcribed with TYB Pol	-1.36086	0.560858	Not-significant	2.62732	0.03109	Up-regulated
YMR011W	HXT2	High-affinity glucose transporter of the major facilitator superfamily	0.279	0.91178	Not-significant	2.62713	0.00185037	Up-regulated
YHR071C-A	YHR071C-A	Dubious open reading frame	-0.0948026	0.967197	Not-significant	2.61852	0.00308776	Up-regulated
YMR101C	SRT1	Cis-prenyltransferase	-0.0946333	0.953279	Not-significant	2.61848	4.00756e-07	Up-regulated
YHL012W	YHL012W	Putative UTP glucose-1-phosphate uridylyltransferase	-0.156402	0.946722	Not-significant	2.59678	0.000858435	Up-regulated
YPL114W	YPL114W	Dubious open reading frame	-0.101652	0.953279	Not-significant	2.59322	1.62143e-05	Up-regulated
YHR048W	YHK8	Presumed antiporter of the major facilitator superfamily	0.273497	0.844229	Not-significant	2.58699	5.64396e-05	Up-regulated
YCL064C	CHA1	Catabolic L-serine (L-threonine) deaminase	-0.426203	0.43989	Not-significant	2.57725	1.6284e-17	Up-regulated
YML056C	IMD4	Inosine monophosphate dehydrogenase	-0.0786385	0.858798	Not-significant	2.57614	1.22442e-85	Up-regulated
YOR337W	TEA1	Ty1 enhancer activator involved in Ty enhancer-mediated transcription	-0.301019	0.00281673	Significant	2.56387	1.01204e-138	Up-regulated
snR191	snR191	H/ACA box small nucleolar RNA (snoRNA)	0.00981013	0.996127	Not-significant	2.55666	2.61414e-06	Up-regulated
YJL116C	NCA3	Protein involved in mitochondrion organization	-0.079936	0.863626	Not-significant	2.54938	6.63847e-59	Up-regulated
YDR446W	ECM11	Meiosis-specific protein	0.853335	0.395906	Not-significant	2.52611	0.00768495	Up-regulated
YNL112W	DBP2	ATP-dependent RNA helicase of the DEAD-box protein family	-0.279108	0.61794	Not-significant	2.50349	1.22779e-30	Up-regulated
YOR146W	YOR146W	Dubious open reading frame	0.116081	0.96693	Not-significant	2.4978	0.0245424	Up-regulated
YHR022C	YHR022C	Putative protein of unknown function	0.861076	0.0360588	Significant	2.49115	4.39087e-07	Up-regulated
YGR079W	YGR079W	Putative protein of unknown function	0.083624	0.800002	Not-significant	2.44965	2.631e-47	Up-regulated
YML122C	YML122C	Dubious open reading frame	0.456475	0.774519	Not-significant	2.44819	0.00966001	Up-regulated
YMR193C-A	YMR193C-A	Dubious open reading frame	-0.718562	0.772495	Not-significant	2.44225	0.0490706	Up-regulated
YIL117C	PRM5	Pheromone-regulated protein, predicted to have 1 transmembrane segment	0.294094	0.065064	Not-significant	2.43762	3.49473e-101	Up-regulated
YER056C	FCY2	Purine-cytosine permease	0.000228541	0.999766	Not-significant	2.43338	8.08238e-68	Up-regulated
YML047C	PRM6	Potassium transporter that mediates K+ influx	0.644398	0.699979	Not-significant	2.42438	0.0428313	Up-regulated
YKL078W	DHR2	Predominantly nucleolar DEAH-box ATP-dependent RNA helicase	-0.047758	0.913509	Not-significant	2.41086	8.08238e-68	Up-regulated
YGL188C-A	YGL188C-A	Putative protein of unknown function	-0.34508	0.583119	Not-significant	2.40293	8.85883e-09	Up-regulated
YLR222C-A	YLR222C-A	Dubious open reading frame	-0.0101138	0.997024	Not-significant	2.40245	8.26682e-06	Up-regulated
YGR138C	TPO2	Polyamine transporter of the major facilitator superfamily	-0.418694	0.76806	Not-significant	2.39367	0.000538046	Up-regulated
YBR250W	SPO23	Protein of unknown function	-0.403445	0.488931	Not-significant	2.3926	9.3767e-11	Up-regulated
YNR053C	NOG2	Putative GTPase	-0.0796602	0.88422	Not-significant	2.38815	2.11438e-45	Up-regulated
YCL037C	SRO9	Cytoplasmic RNA-binding protein	-0.327761	0.605071	Not-significant	2.34205	1.88132e-09	Up-regulated
YPL088W	YPL088W	Putative aryl alcohol dehydrogenase	-0.184153	0.619648	Not-significant	2.32713	1.79087e-40	Up-regulated
YCL001W-B	YCL001W-B	Putative protein of unknown function	0.19496	0.946265	Not-significant	2.31036	0.0446223	Up-regulated
YJL109C	UTP10	Nucleolar protein	-0.112228	0.862643	Not-significant	2.28841	9.88858e-27	Up-regulated
snR59	snR59	C/D box small nucleolar RNA (snoRNA)	-0.171502	0.959328	Not-significant	2.28276	0.0145274	Up-regulated
YPL025C	YPL025C	Dubious open reading frame	-0.292646	0.850367	Not-significant	2.27077	0.00042978	Up-regulated
YFR023W	PES4	Poly(A) binding protein, suppressor of DNA polymerase epsilon mutation	-0.0868055	0.951519	Not-significant	2.26965	1.46422e-06	Up-regulated
YGR160W	YGR160W	Dubious open reading frame	-0.0264138	0.991489	Not-significant	2.24755	0.000394732	Up-regulated
YBL039C	URA7	Major CTP synthase isozyme (see also URA8)	-0.118529	0.693712	Not-significant	2.23501	8.56044e-79	Up-regulated
YPL198W	RPL7B	Ribosomal 60S subunit protein L7B	0.32026	0.263732	Not-significant	2.22639	7.41173e-23	Up-regulated
YCL048W-A	YCL048W-A	Putative protein of unknown function	0.586174	0.583338	Not-significant	2.22341	1.55134e-05	Up-regulated
YJL038C	YJL038C	Protein involved in outer spore wall assembly	0.34909	0.810091	Not-significant	2.21584	0.0125327	Up-regulated
YPR010C	RPA135	RNA polymerase I second largest subunit A135	-0.0746107	0.811901	Not-significant	2.21475	8.26654e-99	Up-regulated
YJL107C	YJL107C	Putative protein of unknown function	-0.0292646	0.958407	Not-significant	2.21283	5.86567e-46	Up-regulated
YKR092C	SRP40	Nucleolar serine-rich protein	-0.217245	0.39295	Not-significant	2.21259	8.04786e-62	Up-regulated
YER044C-A	MEI4	Meiosis-specific protein involved in forming DSBs	0.385926	0.622156	Not-significant	2.20534	8.19267e-07	Up-regulated
YMR319C	FET4	Low-affinity Fe(II) transporter of the plasma membrane	0.201582	0.605998	Not-significant	2.20383	2.29566e-17	Up-regulated
YER052C	HOM3	Aspartate kinase (L-aspartate 4-P-transferase)	-0.198579	0.277219	Not-significant	2.20263	2.30457e-104	Up-regulated
YMR230W-A	YMR230W-A	Putative protein of unknown function	-1.19391	0.321798	Not-significant	2.18879	0.0201722	Up-regulated
YDL063C	YDL063C	Transport adaptor or symportin	-0.0512445	0.902635	Not-significant	2.18533	9.98005e-35	Up-regulated
tN(GUU)N1	tN(GUU)N1	Asparagine tRNA (tRNA-Asn), predicted by tRNAscan-SE analysis	-0.113926	0.960344	Not-significant	2.1713	0.00981425	Up-regulated
YJR097W	JJJ3	Protein of unknown function	-0.110979	0.843316	Not-significant	2.17073	1.77288e-20	Up-regulated
YLR073C	RFU1	Protein that inhibits Doa4p deubiquitinating activity	-0.0956215	0.858867	Not-significant	2.17032	4.45989e-30	Up-regulated
YGR159C	NSR1	Nucleolar protein that binds nuclear localization sequences	-0.00394475	0.995848	Not-significant	2.16963	6.01367e-49	Up-regulated
YPL093W	NOG1	Putative GTPase	-0.0767288	0.854737	Not-significant	2.15107	8.90613e-57	Up-regulated
YOL124C	TRM11	Catalytic subunit of adoMet-dependent tRNA methyltransferase complex	-0.0468405	0.942711	Not-significant	2.14541	3.32114e-28	Up-regulated
YIR027C	DAL1	Allantoinase	0.286681	0.828928	Not-significant	2.14462	5.78065e-05	Up-regulated
YGL184C	STR3	Peroxisomal cystathionine beta-lyase	0.366466	0.688522	Not-significant	2.13606	1.34373e-07	Up-regulated
tV(AAC)M1	tV(AAC)M1	Valine tRNA (tRNA-Val), predicted by tRNAscan-SE analysis	-1.0182	0.424307	Not-significant	2.12679	0.00797979	Up-regulated
YJL200C	ACO2	Putative mitochondrial aconitase isozyme	-0.330915	0.238632	Not-significant	2.1151	2.84648e-26	Up-regulated
YPR124W	CTR1	High-affinity copper transporter of the plasma membrane	-0.0163877	0.989652	Not-significant	2.11223	9.89034e-06	Up-regulated
YKL068W-A	YKL068W-A	Putative protein of unknown function	-0.175252	0.78376	Not-significant	2.09807	2.44442e-30	Up-regulated
YLR058C	SHM2	Cytosolic serine hydroxymethyltransferase	0.249397	0.593765	Not-significant	2.09706	1.28426e-22	Up-regulated
YLL008W	DRS1	Nucleolar DEAD-box protein required for ribosome assembly and function	-0.132358	0.631442	Not-significant	2.09548	1.52851e-61	Up-regulated
YJL108C	PRM10	Pheromone-regulated protein	0.0367493	0.946265	Not-significant	2.09159	7.578e-44	Up-regulated
YLL012W	YEH1	Steryl ester hydrolase	0.164541	0.423143	Not-significant	2.08495	6.51928e-64	Up-regulated
YHR197W	RIX1	Component of the Rix1 complex and possibly pre-replicative complexes	-0.124403	0.775814	Not-significant	2.08143	6.02511e-26	Up-regulated
YLR432W	IMD3	Inosine monophosphate dehydrogenase	-0.119847	0.780374	Not-significant	2.07025	1.3517e-32	Up-regulated
YBR142W	MAK5	Essential nucleolar protein	-0.0268748	0.962672	Not-significant	2.06928	3.2343e-56	Up-regulated
YDR165W	TRM82	Catalytic subunit of a tRNA methyltransferase complex	-0.128763	0.813728	Not-significant	2.06446	1.8744e-19	Up-regulated
YER106W	MAM1	Monopolin	0.325306	0.780374	Not-significant	2.0602	0.00377584	Up-regulated
YLR237W	THI7	Plasma membrane transporter responsible for the uptake of thiamine	0.162556	0.387162	Not-significant	2.05363	1.5326e-97	Up-regulated
YLR180W	SAM1	S-adenosylmethionine synthetase	0.346414	0.384633	Not-significant	2.04668	3.2872e-17	Up-regulated
YMR217W	GUA1	GMP synthase	-0.118975	0.780146	Not-significant	2.04607	4.78585e-44	Up-regulated
YPR035W	GLN1	Glutamine synthetase (GS)	0.188247	0.532876	Not-significant	2.03766	1.20667e-37	Up-regulated
YGR283C	YGR283C	Putative methyltransferase	-0.065415	0.864854	Not-significant	2.03559	1.03866e-31	Up-regulated
snR39	snR39	C/D box small nucleolar RNA (snoRNA)	-0.638219	0.813435	Not-significant	2.02229	0.00331774	Up-regulated
YPL183C	RTT10	WD40 domain-containing protein involved in endosomal recycling	-0.170375	0.554162	Not-significant	2.01367	7.97781e-32	Up-regulated
YGL117W	YGL117W	Putative protein of unknown function	-0.363103	0.188774	Not-significant	2.01153	2.02674e-33	Up-regulated
YOR341W	RPA190	RNA polymerase I largest subunit A190	-0.128003	0.750073	Not-significant	1.99132	6.62198e-44	Up-regulated
YDR398W	UTP5	Subunit of U3-containing Small Subunit (SSU) processome complex	-0.123799	0.731904	Not-significant	1.97937	1.29024e-34	Up-regulated
YPL012W	RRP12	Protein required for export of the ribosomal subunits	-0.0971759	0.811901	Not-significant	1.97822	8.81523e-31	Up-regulated
YPR158W-B	YPR158W-B	Retrotransposon TYA Gag and TYB Pol genes	0.477665	0.0629972	Not-significant	1.96881	1.59862e-18	Up-regulated
YIL079C	AIR1	Zinc knuckle protein	-0.105312	0.80093	Not-significant	1.96495	7.32212e-34	Up-regulated
YBR034C	HMT1	Nuclear SAM-dependent mono- and asymmetric methyltransferase	0.071951	0.904531	Not-significant	1.96343	1.52189e-29	Up-regulated
YBR182C	SMP1	MADS-box transcription factor involved in osmotic stress response	-0.197833	0.660749	Not-significant	1.94927	2.07223e-21	Up-regulated
YJL088W	ARG3	Ornithine carbamoyltransferase	-0.608555	0.000852684	Significant	1.94749	1.0216e-31	Up-regulated
YGR090W	UTP22	Component of the small-subunit processome	-0.0612809	0.943125	Not-significant	1.94583	1.68842e-17	Up-regulated
YOR340C	RPA43	RNA polymerase I subunit A43	-0.155836	0.575569	Not-significant	1.94581	1.82049e-40	Up-regulated
YKL163W	PIR3	O-glycosylated covalently-bound cell wall protein	0.690366	0.0119395	Significant	1.93916	0.000101264	Up-regulated
YMR131C	RRB1	Nuclear protein involved in early steps of ribosome biogenesis	-0.0923784	0.792483	Not-significant	1.93707	1.71924e-46	Up-regulated
YJL191W	RPS14B	Protein component of the small (40S) ribosomal subunit	0.21669	0.406494	Not-significant	1.93545	1.77087e-37	Up-regulated
YKR080W	MTD1	NAD-dependent 5,10-methylenetetrahydrafolate dehydrogenase	0.122366	0.862643	Not-significant	1.9309	4.40164e-18	Up-regulated
YPR144C	NOC4	Nucleolar protein	-0.0139814	0.974398	Not-significant	1.9255	9.46378e-37	Up-regulated
YBR238C	YBR238C	Mitochondrial membrane protein	0.253941	0.413195	Not-significant	1.91962	5.70713e-44	Up-regulated
YCR057C	PWP2	Conserved 90S pre-ribosomal component	-0.0734865	0.786495	Not-significant	1.91744	5.27874e-72	Up-regulated
YNL095C	YNL095C	Putative protein of unknown function	-0.034252	0.959733	Not-significant	1.91486	2.81587e-11	Up-regulated
YBR292C	YBR292C	Dubious open reading frame	-0.520687	0.780374	Not-significant	1.91337	0.0117587	Up-regulated
YJL050W	MTR4	ATP-dependent 3'-5' RNA helicase of the DExD/H family	-0.130806	0.571782	Not-significant	1.91315	2.78425e-74	Up-regulated
YNR012W	URK1	Uridine/cytidine kinase	-0.0383868	0.907611	Not-significant	1.90653	1.45338e-38	Up-regulated
YFL034C-A	RPL22B	Ribosomal 60S subunit protein L22B	-0.0325932	0.959265	Not-significant	1.89984	7.98139e-27	Up-regulated
YNL162W-A	YNL162W-A	Putative protein of unknown function	0.037345	0.971334	Not-significant	1.8979	8.2793e-07	Up-regulated
snR31	snR31	H/ACA box small nucleolar RNA (snoRNA)	-0.278435	0.628105	Not-significant	1.89156	7.8827e-13	Up-regulated
YHR179W	OYE2	Conserved NADPH oxidoreductase containing flavin mononucleotide (FMN)	-0.263429	0.472833	Not-significant	1.89137	1.16718e-21	Up-regulated
YFR032C	RRT5	Putative protein of unknown function	-0.809948	0.246942	Not-significant	1.88973	3.84031e-10	Up-regulated
YPL250C	ICY2	Protein of unknown function	-0.298746	0.431479	Not-significant	1.88791	2.62657e-17	Up-regulated
YGL255W	ZRT1	High-affinity zinc transporter of the plasma membrane	-0.281901	0.229501	Not-significant	1.88304	1.36067e-20	Up-regulated
YPL036W	PMA2	Plasma membrane H+-ATPase	0.770692	1.93397e-07	Significant	1.88301	1.3022e-12	Up-regulated
YOR351C	MEK1	Meiosis-specific serine/threonine protein kinase	0.71163	0.516442	Not-significant	1.88215	0.0267697	Up-regulated
YDR316W-B	YDR316W-B	Retrotransposon TYA Gag and TYB Pol genes	0.908305	0.00866722	Significant	1.87752	1.21258e-05	Up-regulated
YOR359W	VTS1	Flap-structured DNA-binding and RNA-binding protein	-0.0511368	0.902566	Not-significant	1.87736	4.28859e-46	Up-regulated
YBR114W	RAD16	Nucleotide excision repair (NER) protein	0.215285	0.147621	Not-significant	1.87722	2.76945e-65	Up-regulated
YBR247C	ENP1	Protein associated with U3 and U14 snoRNAs	-0.115002	0.668237	Not-significant	1.87061	7.2498e-54	Up-regulated
YBR084W	MIS1	Mitochondrial C1-tetrahydrofolate synthase	-0.380111	0.088545	Not-significant	1.86198	2.08604e-35	Up-regulated
YPR194C	OPT2	Oligopeptide transporter	-0.787227	0.02669	Significant	1.85881	4.24817e-14	Up-regulated
YJL148W	RPA34	RNA polymerase I subunit A34.5	-0.0997392	0.790481	Not-significant	1.85497	2.73746e-25	Up-regulated
YIL096C	YIL096C	Methyltransferase required for m3U2634 methylation of the 25S rRNA	-0.170193	0.688522	Not-significant	1.85428	7.00152e-25	Up-regulated
YDR021W	FAL1	Nucleolar protein required for maturation of 18S rRNA	-0.191929	0.671817	Not-significant	1.85425	1.81111e-18	Up-regulated
YEL026W	SNU13	RNA binding protein	-0.0800845	0.862643	Not-significant	1.852	2.06218e-37	Up-regulated
YNL248C	RPA49	RNA polymerase I subunit A49	-0.122668	0.694278	Not-significant	1.84968	9.23667e-38	Up-regulated
YLR216C	CPR6	Peptidyl-prolyl cis-trans isomerase (cyclophilin)	0.879955	2.09561e-07	Significant	1.84883	1.14051e-43	Up-regulated
YOL144W	NOP8	Nucleolar protein required for 60S ribosomal subunit biogenesis	-0.139195	0.568194	Not-significant	1.84825	1.21875e-42	Up-regulated
YDR384C	ATO3	Plasma membrane protein, putative ammonium transporter	0.211567	0.36143	Not-significant	1.84259	3.03764e-41	Up-regulated
YDR098C-B	YDR098C-B	Retrotransposon TYA Gag and TYB Pol genes	0.207941	0.732326	Not-significant	1.84213	3.85007e-07	Up-regulated
YGL120C	PRP43	RNA helicase in the DEAH-box family	-0.0697564	0.874614	Not-significant	1.84004	1.1595e-47	Up-regulated
YIR026C	YVH1	Protein phosphatase	-0.125942	0.807685	Not-significant	1.83744	9.58269e-21	Up-regulated
YOR177C	MPC54	Component of the meiotic outer plaque	-0.055994	0.947205	Not-significant	1.83494	5.6697e-12	Up-regulated
YMR049C	ERB1	Constituent of 66S pre-ribosomal particles	-0.0650274	0.83285	Not-significant	1.83465	5.83881e-52	Up-regulated
YAL036C	RBG1	Member of the DRG family of GTP-binding proteins	-0.146385	0.684265	Not-significant	1.83314	4.9418e-31	Up-regulated
YDR037W	KRS1	Lysyl-tRNA synthetase	-0.0725023	0.864194	Not-significant	1.82891	1.18688e-47	Up-regulated
YHR170W	NMD3	Protein involved in nuclear export of the large ribosomal subunit	-0.121573	0.728059	Not-significant	1.82659	8.12264e-36	Up-regulated
YJL037W	IRC18	Protein involved in outer spore wall assembly	-0.0147278	0.991489	Not-significant	1.82534	0.000143276	Up-regulated
YMR290C	HAS1	ATP-dependent RNA helicase	-0.0724556	0.82439	Not-significant	1.8229	7.1298e-60	Up-regulated
YCR072C	RSA4	WD-repeat protein involved in ribosome biogenesis	-0.0889279	0.810083	Not-significant	1.81995	1.60562e-29	Up-regulated
YJL033W	HCA4	DEAD box RNA helicase	-0.0482238	0.901206	Not-significant	1.81685	1.56108e-42	Up-regulated
snR4	snR4	C/D box small nucleolar RNA (snoRNA) but not shown to be active	0.0418726	0.971194	Not-significant	1.81536	6.53301e-09	Up-regulated
YGR128C	UTP8	Nucleolar protein required for export of tRNAs from the nucleus	-0.123284	0.792483	Not-significant	1.81288	5.8342e-20	Up-regulated
YGR245C	SDA1	Protein required for actin organization and passage through Start	-0.120563	0.706794	Not-significant	1.81106	1.39244e-46	Up-regulated
YCL021W-A	YCL021W-A	Putative protein of unknown function	0.164209	0.914831	Not-significant	1.80643	0.00201005	Up-regulated
YNL277W-A	YNL277W-A	Putative protein of unknown function	1.40898	0.0679655	Not-significant	1.80627	0.0477188	Up-regulated
YHR196W	UTP9	Nucleolar protein	-0.174365	0.759568	Not-significant	1.80357	9.41034e-12	Up-regulated
YLR407W	YLR407W	Putative protein of unknown function	-0.102492	0.808702	Not-significant	1.79757	4.11073e-22	Up-regulated
YLR410W-B	YLR410W-B	Retrotransposon TYA Gag and TYB Pol genes	0.271249	0.539487	Not-significant	1.79665	1.39089e-25	Up-regulated
YNL062C	GCD10	Subunit of tRNA (1-methyladenosine) methyltransferase with Gcd14p	-0.113571	0.626339	Not-significant	1.79572	3.6753e-28	Up-regulated
YGL147C	RPL9A	Ribosomal 60S subunit protein L9A	-0.38725	0.189036	Not-significant	1.78889	3.54932e-23	Up-regulated
YNL124W	NAF1	RNA-binding protein required for the assembly of box H/ACA snoRNPs	-0.0330358	0.948944	Not-significant	1.78268	6.11242e-39	Up-regulated
YDR101C	ARX1	Nuclear export factor for the ribosomal pre-60S subunit	-0.0816568	0.826017	Not-significant	1.77435	1.10584e-43	Up-regulated
YPL226W	NEW1	ATP binding cassette protein	0.0459941	0.928125	Not-significant	1.77312	2.46328e-45	Up-regulated
YBR141C	YBR141C	Nucleolar S-adenosylmethionine-dependent rRNA methyltransferase	-0.0280686	0.964746	Not-significant	1.76983	5.75649e-20	Up-regulated
YDR449C	UTP6	Nucleolar protein	-0.142182	0.865711	Not-significant	1.76804	5.68054e-10	Up-regulated
YBL071W-A	KTI11	Zn-ribbon protein that co-purifies with Dph1 and Dph2	-0.0358211	0.9689	Not-significant	1.76388	3.07395e-11	Up-regulated
YCL019W	YCL019W	Retrotransposon TYA Gag and TYB Pol genes	0.57464	0.0501259	Not-significant	1.75823	2.33808e-28	Up-regulated
YAR010C	YAR010C	Retrotransposon TYA Gag gene co-transcribed with TYB Pol	0.317286	0.486771	Not-significant	1.75777	0.000776936	Up-regulated
YDR184C	ATC1	Nuclear protein	-0.0561116	0.900594	Not-significant	1.75541	1.91123e-27	Up-regulated
YIL091C	UTP25	Nucleolar protein	-0.0306724	0.937643	Not-significant	1.75481	1.90128e-51	Up-regulated
YLR023C	IZH3	Membrane protein involved in zinc ion homeostasis	-0.229448	0.0401761	Significant	1.75251	3.74144e-99	Up-regulated
YOR095C	RKI1	Ribose-5-phosphate ketol-isomerase	-0.326896	0.0254586	Significant	1.75246	6.88524e-49	Up-regulated
YHL011C	PRS3	5-phospho-ribosyl-1(alpha)-pyrophosphate synthetase	-0.10011	0.754121	Not-significant	1.74957	1.18688e-47	Up-regulated
YER138C	YER138C	Retrotransposon TYA Gag and TYB Pol genes	0.328138	0.35484	Not-significant	1.74929	5.7516e-18	Up-regulated
YLR196W	PWP1	Protein with WD-40 repeats involved in rRNA processing	-0.0658432	0.862643	Not-significant	1.74861	2.63677e-46	Up-regulated
YDL060W	TSR1	Protein required for processing of 20S pre-rRNA in the cytoplasm	-0.0671786	0.850173	Not-significant	1.74783	1.94849e-52	Up-regulated
YOR242C	SSP2	Sporulation specific protein that localizes to the spore wall	-0.49183	0.624449	Not-significant	1.74641	0.00549837	Up-regulated
YKL009W	MRT4	Protein involved in mRNA turnover and ribosome assembly	-0.151397	0.658965	Not-significant	1.74476	3.79708e-29	Up-regulated
YGR187C	HGH1	Nonessential protein of unknown function	-0.218394	0.315546	Not-significant	1.74272	7.53108e-23	Up-regulated
YDR465C	RMT2	Arginine N5 methyltransferase	-0.186782	0.428505	Not-significant	1.74223	2.21167e-39	Up-regulated
YDR183C-A	YDR183C-A	Dubious open reading frame unlikely to encode a functional protein	-0.194195	0.961157	Not-significant	1.74064	0.0325757	Up-regulated
YOL103W-B	YOL103W-B	Retrotransposon TYA Gag and TYB Pol genes	0.224236	0.608584	Not-significant	1.73758	7.57166e-23	Up-regulated
YDR060W	MAK21	Constituent of 66S pre-ribosomal particles	-0.0771529	0.820219	Not-significant	1.73307	2.08865e-38	Up-regulated
YGR145W	ENP2	Component of the SSU	-0.142869	0.574818	Not-significant	1.73289	2.23313e-38	Up-regulated
YGL028C	SCW11	Cell wall protein with similarity to glucanases	0.48114	3.12602e-05	Significant	1.73011	2.74035e-27	Up-regulated
YLR223C	IFH1	Coactivator, regulates transcription of ribosomal protein (RP) genes	0.0842011	0.809499	Not-significant	1.72623	6.85739e-40	Up-regulated
YCL054W	SPB1	AdoMet-dependent methyltransferase	0.0180012	0.968898	Not-significant	1.72479	3.41509e-49	Up-regulated
YNL024C	YNL024C	Putative methyltransferase	-0.206758	0.656569	Not-significant	1.72443	2.03146e-16	Up-regulated
YBR267W	REI1	Cytoplasmic pre-60S factor	-0.126763	0.688522	Not-significant	1.72376	3.11509e-29	Up-regulated
YNL132W	KRE33	Protein required for biogenesis of the small ribosomal subunit	-0.146105	0.562998	Not-significant	1.72362	6.98447e-59	Up-regulated
YPL043W	NOP4	Nucleolar protein	-0.114179	0.772495	Not-significant	1.72139	9.12684e-31	Up-regulated
YOR360C	PDE2	High-affinity cyclic AMP phosphodiesterase	0.173565	0.704711	Not-significant	1.72127	2.45522e-17	Up-regulated
YPL130W	SPO19	Meiosis-specific prospore protein	-0.692366	0.651851	Not-significant	1.71591	0.0246056	Up-regulated
YOR355W	GDS1	Protein of unknown function	-0.186276	0.299382	Not-significant	1.71537	4.0426e-36	Up-regulated
YLR063W	YLR063W	Methyltransferase required for m3U2843 methylation of the 25S rRNA	0.0376811	0.939099	Not-significant	1.71535	6.52557e-29	Up-regulated
YGL171W	ROK1	RNA-dependent ATPase	-0.104062	0.699651	Not-significant	1.71239	8.2481e-59	Up-regulated
YMR229C	RRP5	RNA binding protein involved in synthesis of both 18S and 5.8S rRNAs	-0.263459	0.408361	Not-significant	1.70057	4.6957e-28	Up-regulated
YOR204W	DED1	ATP-dependent DEAD (Asp-Glu-Ala-Asp)-box RNA helicase	0.136303	0.693712	Not-significant	1.7	7.4594e-43	Up-regulated
YDR324C	UTP4	Subunit of U3-containing 90S preribosome and SSU processome complexes	-0.175671	0.472833	Not-significant	1.69779	4.36254e-32	Up-regulated
YHR015W	MIP6	Putative RNA-binding protein	-1.20486	0.00482552	Down-regulated	1.69766	4.33134e-05	Up-regulated
YDR496C	PUF6	Pumilio-homology domain protein	-0.00930419	0.988535	Not-significant	1.69351	3.31728e-25	Up-regulated
YGR103W	NOP7	Component of several different pre-ribosomal particles	-0.146313	0.593765	Not-significant	1.69137	1.12936e-31	Up-regulated
YIR012W	SQT1	Protein involved in 60S ribosomal subunit assembly or modification	-0.087115	0.844594	Not-significant	1.69046	3.33712e-29	Up-regulated
YKL143W	LTV1	Component of the GSE complex	-0.273037	0.244478	Not-significant	1.6898	2.58901e-27	Up-regulated
YLL034C	RIX7	Putative ATPase of the AAA family	-0.101329	0.718349	Not-significant	1.68841	4.85954e-51	Up-regulated
YCL058W-A	ADF1	Transcriptional repressor encoded by the FYV5 antisense strand	-0.0201258	0.981977	Not-significant	1.68557	4.33055e-13	Up-regulated
YHR066W	SSF1	Constituent of 66S pre-ribosomal particles	-0.104774	0.731904	Not-significant	1.67914	3.09456e-31	Up-regulated
YLR074C	BUD20	C2H2-type zinc finger protein required for ribosome assembly	0.0456372	0.951865	Not-significant	1.67456	2.12963e-16	Up-regulated
YHR085W	IPI1	Component of the Rix1 complex and possibly pre-replicative complexes	-0.125602	0.747355	Not-significant	1.67368	5.67733e-24	Up-regulated
YPL126W	NAN1	U3 snoRNP protein	-0.0452293	0.933949	Not-significant	1.67351	6.29209e-36	Up-regulated
YPL146C	NOP53	Nucleolar protein	-0.115948	0.828928	Not-significant	1.67092	1.11899e-15	Up-regulated
YDR540C	IRC4	Putative protein of unknown function	0.0775155	0.961137	Not-significant	1.67088	0.00167776	Up-regulated
YCR087C-A	YCR087C-A	Putative protein of unknown function	-0.0911022	0.877105	Not-significant	1.66952	5.22404e-17	Up-regulated
YLR448W	RPL6B	Ribosomal 60S subunit protein L6B	-0.224301	0.486938	Not-significant	1.66339	1.0709e-23	Up-regulated
YOR309C	YOR309C	Dubious open reading frame	-0.173259	0.68679	Not-significant	1.65559	5.84124e-13	Up-regulated
YML043C	RRN11	Component of the core factor (CF) rDNA transcription factor complex	0.110612	0.806795	Not-significant	1.65481	9.60321e-15	Up-regulated
YNL281W	HCH1	Heat shock protein regulator	0.331895	0.275273	Not-significant	1.65223	4.23355e-16	Up-regulated
YNR060W	FRE4	Ferric reductase	-0.149152	0.855012	Not-significant	1.6517	1.65244e-08	Up-regulated
YJL098W	SAP185	Protein that forms a complex with the Sit4p protein phosphatase	0.00120225	0.997596	Not-significant	1.64678	3.18916e-50	Up-regulated
YML108W	YML108W	Protein of unknown function	0.0508687	0.924672	Not-significant	1.64498	2.32461e-14	Up-regulated
YLR333C	RPS25B	Protein component of the small (40S) ribosomal subunit	-0.272052	0.299382	Not-significant	1.64283	1.95251e-27	Up-regulated
YER127W	LCP5	Essential protein involved in maturation of 18S rRNA	-0.133684	0.632833	Not-significant	1.64056	1.60997e-37	Up-regulated
YML113W	DAT1	DNA binding protein that recognizes oligo(dA).oligo(dT) tracts	0.0524375	0.923713	Not-significant	1.64041	2.44455e-23	Up-regulated
YLR401C	DUS3	Dihydrouridine synthase	-0.145684	0.632971	Not-significant	1.63951	1.92587e-36	Up-regulated
YIL104C	SHQ1	Chaperone protein	-0.0558701	0.894925	Not-significant	1.63938	6.57489e-30	Up-regulated
YGR027W-B	YGR027W-B	Retrotransposon TYA Gag and TYB Pol genes	0.0386946	0.958293	Not-significant	1.63076	2.90947e-16	Up-regulated
YKR099W	BAS1	Myb-related transcription factor	-0.0966254	0.695145	Not-significant	1.62332	1.0701e-59	Up-regulated
YJL069C	UTP18	Small-subunit processome protein involved in pre-18S rRNA maturation	-0.0336391	0.930724	Not-significant	1.62217	3.93156e-30	Up-regulated
YLR044C	PDC1	Major of three pyruvate decarboxylase isozymes	0.0179761	0.971334	Not-significant	1.62144	2.58556e-22	Up-regulated
YHR030C	SLT2	Serine/threonine MAP kinase	-0.026087	0.962099	Not-significant	1.62128	5.4029e-57	Up-regulated
YHR148W	IMP3	Component of the SSU processome	-0.125164	0.747355	Not-significant	1.61861	5.89447e-24	Up-regulated
YAL040C	CLN3	G1 cyclin involved in cell cycle progression	0.132834	0.611012	Not-significant	1.61851	9.25282e-45	Up-regulated
YOL128C	YGK3	Protein kinase related to mammalian GSK-3 glycogen synthase kinases	-0.164369	0.600524	Not-significant	1.61347	6.4161e-21	Up-regulated
YPR112C	MRD1	Essential conserved small ribosomal subunit (40s) synthesis factor	-0.109396	0.722285	Not-significant	1.61338	4.80327e-42	Up-regulated
YNL182C	IPI3	Component of the Rix1 complex and pre-replicative complexes (pre-RCs)	-0.116607	0.729316	Not-significant	1.61337	4.156e-30	Up-regulated
YHR214C-B	YHR214C-B	Retrotransposon TYA Gag and TYB Pol genes	-0.0770465	0.859585	Not-significant	1.61319	6.25525e-23	Up-regulated
YER138W-A	YER138W-A	Putative protein of unknown function	-0.415264	0.802731	Not-significant	1.61289	0.0211266	Up-regulated
YHR169W	DBP8	ATPase, putative RNA helicase of the DEAD-box family	-0.00519966	0.994744	Not-significant	1.60455	8.56466e-18	Up-regulated
YER062C	HOR2	DL-glycerol-3-phosphate phosphatase involved in glycerol biosynthesis	0.199244	0.678176	Not-significant	1.60199	2.58294e-18	Up-regulated
YMR239C	RNT1	Nuclear dsRNA-specific ribonuclease (RNase III)	-0.0650479	0.875335	Not-significant	1.60183	3.10461e-21	Up-regulated
YER124C	DSE1	Daughter cell-specific protein	0.590499	0.000384655	Significant	1.59859	1.61811e-19	Up-regulated
YKR024C	DBP7	Putative ATP-dependent RNA helicase of the DEAD-box family	0.00207767	0.997596	Not-significant	1.59734	2.74091e-32	Up-regulated
YMR128W	ECM16	Essential DEAH-box ATP-dependent RNA helicase specific to U3 snoRNP	-0.0816722	0.84354	Not-significant	1.59627	3.05861e-38	Up-regulated
YDR014W-A	HED1	Meiosis-specific protein	0.586958	0.601293	Not-significant	1.59623	0.0127735	Up-regulated
YDL148C	NOP14	Nucleolar protein	-0.161481	0.569748	Not-significant	1.59178	1.56493e-25	Up-regulated
YGR081C	SLX9	Protein required for pre-rRNA processing	-0.175581	0.562055	Not-significant	1.59113	1.13953e-23	Up-regulated
YAL025C	MAK16	Essential nuclear protein	-0.156513	0.627672	Not-significant	1.58924	1.05928e-25	Up-regulated
YOR339C	UBC11	Ubiquitin-conjugating enzyme	-0.591391	0.452761	Not-significant	1.58838	0.000681772	Up-regulated
YGR280C	PXR1	Essential protein involved in rRNA and snoRNA maturation	-0.0776275	0.926412	Not-significant	1.58672	1.28289e-11	Up-regulated
YNR063W	YNR063W	Putative zinc-cluster protein of unknown function	-0.0574515	0.943493	Not-significant	1.58213	7.1875e-12	Up-regulated
YIL020C-A	YIL020C-A	Dubious open reading frame	-0.787359	0.433275	Not-significant	1.58108	0.0197673	Up-regulated
YOR343W-B	YOR343W-B	Retrotransposon TYA Gag and TYB Pol genes	-0.0839451	0.876106	Not-significant	1.5805	2.56073e-21	Up-regulated
YOL080C	REX4	Putative RNA exonuclease	-0.25187	0.398606	Not-significant	1.57591	8.94014e-19	Up-regulated
YLR364W	GRX8	Glutaredoxin that employs a dithiol mechanism of catalysis	-0.981045	1.59352e-05	Significant	1.57412	2.08372e-10	Up-regulated
YPL212C	PUS1	tRNA:pseudouridine synthase	-0.0796745	0.776916	Not-significant	1.56971	5.74221e-44	Up-regulated
YKR081C	RPF2	Essential protein involved in rRNA maturation and ribosomal assembly	-0.325255	0.0298858	Significant	1.56853	3.23746e-33	Up-regulated
YMR300C	ADE4	Phosphoribosylpyrophosphate amidotransferase (PRPPAT)	0.150785	0.682988	Not-significant	1.56695	6.56483e-26	Up-regulated
YJL198W	PHO90	Low-affinity phosphate transporter	0.124805	0.622156	Not-significant	1.5659	3.18981e-22	Up-regulated
YOR234C	RPL33B	Ribosomal 60S subunit protein L33B	-0.22907	0.503135	Not-significant	1.56449	3.29618e-21	Up-regulated
YOR318C	YOR318C	Dubious open reading frame	-0.491877	0.520082	Not-significant	1.5639	0.000976878	Up-regulated
YOR237W	HES1	Protein implicated in the regulation of ergosterol biosynthesis	-0.0772742	0.962099	Not-significant	1.56191	0.00214535	Up-regulated
YLR009W	RLP24	Essential protein required for ribosomal large subunit biogenesis	-0.148576	0.680308	Not-significant	1.56164	3.42425e-25	Up-regulated
YML093W	UTP14	Subunit of U3-containing Small Subunit (SSU) processome complex	-0.131381	0.588544	Not-significant	1.55785	5.74152e-46	Up-regulated
YPL026C	SKS1	Putative serine/threonine protein kinase	-0.365059	0.00689548	Significant	1.55743	3.33712e-29	Up-regulated
YNL221C	POP1	Subunit of both RNase MRP and nuclear RNase P	-0.0370775	0.943727	Not-significant	1.55681	2.11481e-30	Up-regulated
YIL019W	FAF1	Protein required for pre-rRNA processing	-0.287151	0.247621	Not-significant	1.55659	1.38924e-18	Up-regulated
YGR200C	ELP2	Subunit of Elongator complex	-0.0841374	0.693712	Not-significant	1.55623	2.46969e-50	Up-regulated
YER073W	ALD5	Mitochondrial aldehyde dehydrogenase	-0.171335	0.605071	Not-significant	1.55502	2.97979e-17	Up-regulated
YLR003C	CMS1	Putative subunit of the 90S preribosome processome complex	-0.0889369	0.865711	Not-significant	1.55329	1.55502e-16	Up-regulated
YGR039W	YGR039W	Dubious open reading frame	0.170157	0.9123	Not-significant	1.55265	0.00844993	Up-regulated
YOR091W	TMA46	Protein of unknown function that associates with translating ribosomes	-0.0364202	0.951519	Not-significant	1.55258	1.23362e-22	Up-regulated
YNL201C	PSY2	Subunit of protein phosphatase PP4 complex	-0.00645929	0.991489	Not-significant	1.55003	1.02288e-17	Up-regulated
YER006W	NUG1	GTPase that associates with nuclear 60S pre-ribosomes	-0.0970157	0.712201	Not-significant	1.54801	1.17001e-39	Up-regulated
YAL067C	SEO1	Putative permease	-0.674519	0.0770927	Not-significant	1.54666	3.92774e-07	Up-regulated
YER082C	UTP7	Nucleolar protein	-0.0680976	0.865002	Not-significant	1.54544	2.27256e-28	Up-regulated
YDL229W	SSB1	Cytoplasmic ATPase that is a ribosome-associated molecular chaperone	-0.133688	0.736083	Not-significant	1.54418	8.27751e-24	Up-regulated
YHR071W	PCL5	Cyclin	-0.154774	0.603735	Not-significant	1.54262	1.01279e-25	Up-regulated
YJR129C	YJR129C	S-adenosylmethionine-dependent methyltransferase	-0.261009	0.616929	Not-significant	1.53568	8.88574e-09	Up-regulated
YGL078C	DBP3	RNA-Dependent ATPase, member of DExD/H-box family	-0.057547	0.898718	Not-significant	1.52262	1.01171e-31	Up-regulated
YOL010W	RCL1	Endonuclease that cleaves pre-rRNA at site A2 for 18S rRNA biogenesis	-0.0779591	0.790766	Not-significant	1.52199	4.76642e-31	Up-regulated
YHL033C	RPL8A	Ribosomal 60S subunit protein L8A	-0.0254553	0.971645	Not-significant	1.51853	2.68162e-13	Up-regulated
YOR020C	HSP10	Mitochondrial matrix co-chaperonin	0.475641	0.0177649	Significant	1.51701	1.16905e-17	Up-regulated
YML130C	ERO1	Thiol oxidase required for oxidative protein folding in the ER	-0.019819	0.975795	Not-significant	1.51649	6.43632e-15	Up-regulated
YHR184W	SSP1	Protein involved in the control of meiotic nuclear division	0.0957798	0.907594	Not-significant	1.51481	6.46984e-08	Up-regulated
YLR222C	UTP13	Nucleolar protein	-0.0741008	0.810083	Not-significant	1.51372	5.22271e-29	Up-regulated
YOR303W	CPA1	Small subunit of carbamoyl phosphate synthetase	0.228125	0.437681	Not-significant	1.51366	2.58901e-27	Up-regulated
YDL082W	RPL13A	Ribosomal 60S subunit protein L13A	-0.31042	0.197437	Not-significant	1.51363	4.1651e-25	Up-regulated
YLR296W	YLR296W	Dubious open reading frame	-2.73961	1.69264e-05	Down-regulated	1.51363	0.000956382	Up-regulated
YNR057C	BIO4	Dethiobiotin synthetase	-0.116624	0.877909	Not-significant	1.51174	3.83265e-10	Up-regulated
YJR070C	LIA1	Deoxyhypusine hydroxylase	-0.142165	0.78376	Not-significant	1.51119	3.99015e-16	Up-regulated
YHR052W	CIC1	Essential protein that interacts with proteasome components	-0.0420357	0.943484	Not-significant	1.51115	5.96559e-24	Up-regulated
YOR004W	UTP23	Component of the small subunit processome	-0.0851074	0.841496	Not-significant	1.51082	3.95571e-21	Up-regulated
YMR108W	ILV2	Acetolactate synthase	-0.436979	0.00156991	Significant	1.51076	2.17079e-26	Up-regulated
YLR409C	UTP21	Subunit of U3-containing 90S preribosome and SSU processome complexes	-0.0543369	0.874068	Not-significant	1.5103	8.77579e-40	Up-regulated
YJL159W	HSP150	O-mannosylated heat shock protein	0.198827	0.392138	Not-significant	1.50938	2.20121e-30	Up-regulated
YOR302W	YOR302W	CPA1 uORF	0.0543362	0.97248	Not-significant	1.50879	0.00336832	Up-regulated
YNL186W	UBP10	Ubiquitin-specific protease, deubiquitinates Ub-protein moieties	0.007991	0.985827	Not-significant	1.50754	2.01227e-54	Up-regulated
YDR120C	TRM1	tRNA methyltransferase	-0.14068	0.612068	Not-significant	1.49954	3.3629e-27	Up-regulated
YDR299W	BFR2	Component of the SSU and 90S preribosomes	-0.341918	0.0125302	Significant	1.49852	2.50916e-29	Up-regulated
YOR051C	ETT1	Nuclear protein that inhibits replication of Brome mosaic virus	-0.111894	0.744578	Not-significant	1.4966	2.93971e-31	Up-regulated
YKR056W	TRM2	tRNA methyltransferase	-0.142867	0.471791	Not-significant	1.49585	1.37484e-43	Up-regulated
YBR085W	AAC3	Mitochondrial inner membrane ADP/ATP translocator	0.209559	0.87535	Not-significant	1.49503	0.0183802	Up-regulated
YKR025W	RPC37	RNA polymerase III subunit C37	-0.0595107	0.930724	Not-significant	1.49283	1.19195e-16	Up-regulated
YDR527W	RBA50	Protein involved in transcription	0.0343063	0.946722	Not-significant	1.49255	4.49298e-23	Up-regulated
YER045C	ACA1	ATF/CREB family basic leucine zipper (bZIP) transcription factor	0.314863	0.364246	Not-significant	1.49224	9.44522e-15	Up-regulated
snR24	snR24	C/D box small nucleolar RNA (snoRNA)	-0.341427	0.847406	Not-significant	1.49055	0.00940135	Up-regulated
YGR162W	TIF4631	Translation initiation factor eIF4G	-0.0974902	0.73664	Not-significant	1.49047	2.57175e-40	Up-regulated
YKR079C	TRZ1	tRNA 3'-end processing endonuclease tRNase Z	0.0301654	0.9511	Not-significant	1.48878	1.15443e-28	Up-regulated
YNL111C	CYB5	Cytochrome b5	0.0398489	0.92464	Not-significant	1.48794	1.13488e-26	Up-regulated
YHR069C	RRP4	Exosome non-catalytic core component	-0.0197886	0.974064	Not-significant	1.48786	3.98441e-18	Up-regulated
YJR109C	CPA2	Large subunit of carbamoyl phosphate synthetase	-0.125061	0.564713	Not-significant	1.48753	9.3301e-31	Up-regulated
YLR175W	CBF5	Pseudouridine synthase catalytic subunit of box H/ACA snoRNPs	-0.0980057	0.822764	Not-significant	1.48437	6.54375e-23	Up-regulated
YHR070W	TRM5	tRNA(m(1)G37)methyltransferase	0.0782947	0.86839	Not-significant	1.48385	4.15384e-25	Up-regulated
YER064C	YER064C	Non-essential nuclear protein	0.104547	0.564209	Not-significant	1.48374	3.24779e-15	Up-regulated
YER110C	KAP123	Karyopherin beta	-0.179493	0.330601	Not-significant	1.47845	5.89218e-57	Up-regulated
YPR158C-D	YPR158C-D	Retrotransposon TYA Gag and TYB Pol genes	0.0751433	0.902566	Not-significant	1.47734	4.92358e-16	Up-regulated
YOR056C	NOB1	Protein involved in proteasomal and 40S ribosomal subunit biogenesis	-0.184754	0.4757	Not-significant	1.47721	8.3425e-28	Up-regulated
YLR249W	YEF3	Translation elongation factor 3	-0.082621	0.817665	Not-significant	1.47518	6.58818e-36	Up-regulated
YGR123C	PPT1	Protein serine/threonine phosphatase	-0.138065	0.688522	Not-significant	1.47362	1.84212e-20	Up-regulated
YGL234W	ADE5,7	Enzyme of the 'de novo' purine nucleotide biosynthetic pathway	-0.0367013	0.955329	Not-significant	1.47358	1.72084e-18	Up-regulated
YNL270C	ALP1	Arginine transporter	0.175687	0.711947	Not-significant	1.47089	1.70657e-11	Up-regulated
YNL175C	NOP13	Nucleolar protein found in preribosomal complexes	-0.0315096	0.958303	Not-significant	1.46963	1.61957e-24	Up-regulated
YBR155W	CNS1	TPR-containing co-chaperone	0.002225	0.997596	Not-significant	1.46842	1.44096e-17	Up-regulated
YOL041C	NOP12	Nucleolar protein involved in pre-25S rRNA processing	-0.162349	0.642371	Not-significant	1.46823	4.48684e-21	Up-regulated
YOR342C	YOR342C	Protein of unknown function	-0.0211711	0.968898	Not-significant	1.46763	1.43552e-26	Up-regulated
YEL046C	GLY1	Threonine aldolase	-0.141697	0.641595	Not-significant	1.46373	1.15891e-29	Up-regulated
YOR207C	RET1	Second-largest subunit of RNA polymerase III	-0.0278078	0.958242	Not-significant	1.46321	8.69493e-31	Up-regulated
YHR128W	FUR1	Uracil phosphoribosyltransferase	-0.136313	0.774519	Not-significant	1.46124	4.05128e-18	Up-regulated
YGR146C	ECL1	Protein of unknown function	-0.0960133	0.796217	Not-significant	1.4596	7.51122e-33	Up-regulated
YOR294W	RRS1	Essential protein that binds ribosomal protein L11	-0.135411	0.76806	Not-significant	1.45652	1.26388e-13	Up-regulated
YOR145C	PNO1	Essential nucleolar protein required for pre-18S rRNA processing	-0.107743	0.819937	Not-significant	1.45557	6.95751e-19	Up-regulated
YJR041C	URB2	Protein required for normal metabolism of the rRNA primary transcript	-0.146189	0.882011	Not-significant	1.45317	2.39019e-05	Up-regulated
YPL201C	YIG1	Protein that interacts with glycerol 3-phosphatase	-1.14621	5.2173e-07	Down-regulated	1.45306	1.60257e-13	Up-regulated
YKL181W	PRS1	5-phospho-ribosyl-1(alpha)-pyrophosphate synthetase	-0.162208	0.522522	Not-significant	1.45293	9.97479e-29	Up-regulated
YNL301C	RPL18B	Ribosomal 60S subunit protein L18B	-0.142605	0.432154	Not-significant	1.45267	7.3315e-23	Up-regulated
YER060W-A	FCY22	Putative purine-cytosine permease	-1.04546	0.0466927	Down-regulated	1.45175	0.00170189	Up-regulated
YBL055C	YBL055C	3'-->5' exonuclease and endonuclease with a possible role in apoptosis	-0.211867	0.283435	Not-significant	1.45149	1.97915e-28	Up-regulated
YLR336C	SGD1	Essential nuclear protein	0.03211	0.953866	Not-significant	1.45125	9.04642e-24	Up-regulated
YER137C	YER137C	Putative protein of unknown function	-0.191916	0.809443	Not-significant	1.45122	1.909e-07	Up-regulated
YOL136C	PFK27	6-phosphofructo-2-kinase	0.0659681	0.926801	Not-significant	1.44852	1.17426e-09	Up-regulated
YKL205W	LOS1	Nuclear pore protein	-0.209604	0.646069	Not-significant	1.44554	6.44187e-11	Up-regulated
YER036C	ARB1	ATPase of the ATP-binding cassette (ABC) family	0.00258739	0.997024	Not-significant	1.44495	1.03866e-31	Up-regulated
YGR191W	HIP1	High-affinity histidine permease	0.00441106	0.993116	Not-significant	1.44432	5.22056e-35	Up-regulated
YER103W	SSA4	Heat shock protein that is highly induced upon stress	1.25706	1.05486e-09	Up-regulated	1.43948	2.66319e-15	Up-regulated
YGL111W	NSA1	Constituent of 66S pre-ribosomal particles	-0.101381	0.752892	Not-significant	1.43725	2.18425e-26	Up-regulated
YHR174W	ENO2	Enolase II, a phosphopyruvate hydratase	0.260824	0.353	Not-significant	1.43545	2.13439e-15	Up-regulated
YLR129W	DIP2	Nucleolar protein	-0.0947573	0.774519	Not-significant	1.43289	2.22468e-29	Up-regulated
YJL190C	RPS22A	Protein component of the small (40S) ribosomal subunit	-0.357009	0.208876	Not-significant	1.43197	5.15582e-18	Up-regulated
YHR014W	SPO13	Meiotic regulator	-0.421369	0.754121	Not-significant	1.42753	0.017822	Up-regulated
YPL202C	AFT2	Iron-regulated transcriptional activator	0.350618	0.0631843	Not-significant	1.42608	1.01311e-31	Up-regulated
YLL053C	YLL053C	Putative protein	-2.37544	1.67921e-26	Down-regulated	1.42499	2.23049e-18	Up-regulated
YDR340W	YDR340W	Putative protein of unknown function	-0.456239	0.685486	Not-significant	1.42073	0.00432774	Up-regulated
YBR191W-A	YBR191W-A	Dubious open reading frame	-0.374102	0.384291	Not-significant	1.41839	2.18507e-07	Up-regulated
YGR264C	MES1	Methionyl-tRNA synthetase	-0.163741	0.441695	Not-significant	1.41768	1.25143e-28	Up-regulated
YLR276C	DBP9	DEAD-box protein required for 27S rRNA processing	-0.144151	0.495384	Not-significant	1.41756	1.20328e-22	Up-regulated
YER126C	NSA2	Protein constituent of 66S pre-ribosomal particles	-0.171703	0.47396	Not-significant	1.41545	6.12113e-31	Up-regulated
YHR007C	ERG11	Lanosterol 14-alpha-demethylase	0.00654717	0.990856	Not-significant	1.41473	2.18151e-29	Up-regulated
YOL058W	ARG1	Arginosuccinate synthetase	-0.937064	1.25536e-12	Significant	1.41463	8.65056e-26	Up-regulated
YER055C	HIS1	ATP phosphoribosyltransferase	-0.225738	0.4418	Not-significant	1.4128	4.53479e-23	Up-regulated
YDL153C	SAS10	Subunit of U3-containing Small Subunit (SSU) processome complex	-0.15873	0.558345	Not-significant	1.4113	8.19983e-26	Up-regulated
YOL141W	PPM2	AdoMet-dependent tRNA methyltransferase	-0.267189	0.337901	Not-significant	1.41081	5.68233e-18	Up-regulated
YPR080W	TEF1	Translational elongation factor EF-1 alpha	-0.138138	0.719694	Not-significant	1.41009	9.18414e-18	Up-regulated
YMR308C	PSE1	Karyopherin/importin that interacts with the nuclear pore complex	-0.109967	0.567604	Not-significant	1.40961	2.54435e-32	Up-regulated
YIL127C	RRT14	Putative protein of unknown function	-0.238583	0.494204	Not-significant	1.40763	1.25619e-13	Up-regulated
YDR087C	RRP1	Essential evolutionarily conserved nucleolar protein	-0.157162	0.673424	Not-significant	1.40644	4.05128e-18	Up-regulated
YDR042C	YDR042C	Putative protein of unknown function	-0.301262	0.843316	Not-significant	1.40621	0.0269742	Up-regulated
YLL035W	GRC3	Polynucleotide kinase present on rDNA	0.0136203	0.972838	Not-significant	1.4045	7.10129e-20	Up-regulated
YPL276W	YPL276W	NAD(+)-dependent formate dehydrogenase	-0.247019	0.879637	Not-significant	1.40437	0.000879597	Up-regulated
YOR013W	IRC11	Dubious open reading frame	0.0209711	0.986507	Not-significant	1.40278	0.000199234	Up-regulated
YLR061W	RPL22A	Ribosomal 60S subunit protein L22A	-0.303057	0.358732	Not-significant	1.40146	8.6207e-14	Up-regulated
YIL023C	YKE4	Zinc transporter	0.353343	0.232029	Not-significant	1.39867	6.53272e-15	Up-regulated
YLL052C	AQY2	Water channel that mediates water transport across cell membranes	-2.51514	1.39587e-22	Down-regulated	1.39792	3.67528e-10	Up-regulated
snR42	snR42	H/ACA box small nucleolar RNA (snoRNA)	-0.376058	0.641215	Not-significant	1.39772	4.33885e-05	Up-regulated
YKL191W	DPH2	Protein required for synthesis of diphthamide	-0.277702	0.0877432	Not-significant	1.39744	8.27455e-25	Up-regulated
YDR083W	RRP8	Nucleolar S-adenosylmethionine-dependent rRNA methyltransferase	-0.159104	0.55272	Not-significant	1.3953	1.64006e-20	Up-regulated
YJR029W	YJR029W	Retrotransposon TYA Gag and TYB Pol genes	0.148795	0.688522	Not-significant	1.39481	2.7138e-22	Up-regulated
YOR310C	NOP58	Protein involved in producing mature rRNAs and snoRNAs	-0.112014	0.626339	Not-significant	1.39471	1.7539e-40	Up-regulated
YBL004W	UTP20	Component of the small-subunit (SSU) processome	-0.178097	0.660257	Not-significant	1.39452	5.88378e-16	Up-regulated
YBR186W	PCH2	Hexameric ring ATPase that remodels chromosome axis protein Hop1p	-0.266634	0.706794	Not-significant	1.39176	1.75366e-05	Up-regulated
YOR287C	RRP36	Component of 90S preribosomes	-0.169901	0.323063	Not-significant	1.39106	3.93156e-30	Up-regulated
YOR108W	LEU9	Alpha-isopropylmalate synthase II (2-isopropylmalate synthase)	-0.384145	0.00110168	Significant	1.3892	2.11377e-33	Up-regulated
YER069W	ARG5,6	Acetylglutamate kinase and N-acetyl-gamma-glutamyl-phosphate reductase	-0.156396	0.530129	Not-significant	1.38836	5.29023e-31	Up-regulated
YKL217W	JEN1	Monocarboxylate/proton symporter of the plasma membrane	-0.678166	0.328327	Not-significant	1.3843	1.55112e-06	Up-regulated
YPL217C	BMS1	GTPase required for ribosomal subunit synthesis and rRNA processing	-0.119006	0.66764	Not-significant	1.38353	1.70046e-36	Up-regulated
YBR271W	YBR271W	S-adenosylmethionine-dependent methyltransferase	-0.19793	0.404259	Not-significant	1.38279	6.62614e-17	Up-regulated
YOL104C	NDJ1	Meiosis-specific telomere protein	0.0343278	0.971564	Not-significant	1.38241	1.47193e-06	Up-regulated
YMR014W	BUD22	Protein required for rRNA maturation and ribosomal subunit biogenesis	-0.17738	0.418535	Not-significant	1.38233	8.17743e-21	Up-regulated
YDR365C	ESF1	Nucleolar protein involved in pre-rRNA processing	-0.149423	0.579007	Not-significant	1.38065	2.49191e-26	Up-regulated
YNL313C	EMW1	Essential conserved protein with a role in cell wall integrity	-0.0114912	0.977414	Not-significant	1.37667	8.10325e-33	Up-regulated
YHR020W	YHR020W	Prolyl-tRNA synthetase	-0.164919	0.540883	Not-significant	1.37612	3.39038e-27	Up-regulated
YDL051W	LHP1	RNA binding protein required for maturation of tRNA and U6 snRNA	-0.176245	0.488493	Not-significant	1.37477	3.82429e-20	Up-regulated
YPR102C	RPL11A	Ribosomal 60S subunit protein L11A	-0.354811	0.300476	Not-significant	1.37378	2.79304e-12	Up-regulated
YDL167C	NRP1	Putative RNA binding protein of unknown function	-0.107742	0.551666	Not-significant	1.36942	3.66942e-46	Up-regulated
YBR295W	PCA1	Cadmium transporting P-type ATPase	0.229423	0.217264	Not-significant	1.36601	5.05034e-27	Up-regulated
YDR395W	SXM1	Nuclear transport factor (karyopherin)	-0.0550136	0.885838	Not-significant	1.36523	3.54597e-19	Up-regulated
YDL191W	RPL35A	Ribosomal 60S subunit protein L35A	-0.408279	0.251195	Not-significant	1.36418	7.83839e-11	Up-regulated
YDR064W	RPS13	Protein component of the small (40S) ribosomal subunit	-0.271212	0.376483	Not-significant	1.36268	2.75953e-16	Up-regulated
YHL001W	RPL14B	Ribosomal 60S subunit protein L14B	-0.157109	0.662237	Not-significant	1.35859	9.67406e-21	Up-regulated
YMR194W	RPL36A	Ribosomal 60S subunit protein L36A	-0.266069	0.485675	Not-significant	1.35856	8.14614e-14	Up-regulated
YNL069C	RPL16B	Ribosomal 60S subunit protein L16B	-0.287613	0.295566	Not-significant	1.3584	6.71902e-17	Up-regulated
YOL091W	SPO21	Component of the meiotic outer plaque of the spindle pole body	-0.511788	0.405878	Not-significant	1.35782	3.8673e-05	Up-regulated
YNL078W	NIS1	Protein localized in the bud neck at G2/M phase	0.326147	0.062162	Not-significant	1.35691	3.17815e-12	Up-regulated
YCR016W	YCR016W	Putative protein of unknown function	-0.282353	0.193606	Not-significant	1.35641	1.63509e-23	Up-regulated
YAL053W	FLC2	Putative calcium channel involved in calcium release under hypotonic	0.182919	0.441695	Not-significant	1.35556	3.84986e-42	Up-regulated
YDR195W	REF2	RNA-binding protein	-0.196678	0.20223	Not-significant	1.35176	6.52422e-30	Up-regulated
YDL014W	NOP1	Histone glutamine methyltransferase, modifies H2A at Q105 in nucleolus	-0.0997469	0.772229	Not-significant	1.35015	1.249e-22	Up-regulated
YOR168W	GLN4	Glutamine tRNA synthetase	-0.131485	0.508129	Not-significant	1.34973	5.62364e-38	Up-regulated
YOR272W	YTM1	Constituent of 66S pre-ribosomal particles	-0.0971666	0.733166	Not-significant	1.34725	5.12292e-25	Up-regulated
YJR027W	YJR027W	Retrotransposon TYA Gag and TYB Pol genes	0.13701	0.75332	Not-significant	1.34697	7.29728e-17	Up-regulated
YGL183C	MND1	Protein required for recombination and meiotic nuclear division	-0.233371	0.874068	Not-significant	1.34664	0.0202457	Up-regulated
YNL096C	RPS7B	Protein component of the small (40S) ribosomal subunit	-0.246825	0.32384	Not-significant	1.34535	3.38635e-24	Up-regulated
YPL052W	OAZ1	Regulator of ornithine decarboxylase Spe1p	0.165117	0.830848	Not-significant	1.34447	8.23682e-08	Up-regulated
YKL086W	SRX1	Sulfiredoxin	0.34742	0.588928	Not-significant	1.34233	7.56964e-06	Up-regulated
YOR142W-B	YOR142W-B	Retrotransposon TYA Gag and TYB Pol genes	-0.00394701	0.996845	Not-significant	1.34158	2.72659e-15	Up-regulated
YBR181C	RPS6B	Protein component of the small (40S) ribosomal subunit	-0.316394	0.293046	Not-significant	1.33865	4.09683e-15	Up-regulated
YBL075C	SSA3	ATPase involved in protein folding and the response to stress	2.0288	3.09206e-22	Up-regulated	1.3381	2.78673e-08	Up-regulated
YNL119W	NCS2	Protein required for uridine thiolation of Lys(UUU) and Glu(UUC) tRNAs	-0.176984	0.688253	Not-significant	1.33782	2.35966e-07	Up-regulated
YER163C	YER163C	Gamma-glutamyl cyclotransferase	0.11601	0.796335	Not-significant	1.33775	2.92508e-14	Up-regulated
YEL054C	RPL12A	Ribosomal 60S subunit protein L12A	-0.192488	0.660749	Not-significant	1.33738	1.45744e-14	Up-regulated
YPL245W	YPL245W	Putative protein of unknown function	-0.269934	0.300918	Not-significant	1.33592	5.78395e-15	Up-regulated
YNR014W	YNR014W	Putative protein of unknown function	0.763758	0.0257202	Significant	1.3296	7.38576e-06	Up-regulated
YGR177C	ATF2	Alcohol acetyltransferase	-0.225332	0.613018	Not-significant	1.32903	6.10368e-09	Up-regulated
YDR261W-B	YDR261W-B	Retrotransposon TYA Gag and TYB Pol genes	0.205847	0.682988	Not-significant	1.32871	2.84546e-13	Up-regulated
YMR230W	RPS10B	Protein component of the small (40S) ribosomal subunit	-0.288847	0.190057	Not-significant	1.32769	2.13241e-26	Up-regulated
YDR365W-B	YDR365W-B	Retrotransposon TYA Gag and TYB Pol genes	-0.514419	0.680308	Not-significant	1.32627	1.64239e-11	Up-regulated
YOR206W	NOC2	Protein involved in ribosome biogenesis	-0.151161	0.704711	Not-significant	1.32505	2.56915e-13	Up-regulated
YOR192C-B	YOR192C-B	Retrotransposon TYA Gag and TYB Pol genes	0.500496	0.00740416	Significant	1.32457	1.4843e-13	Up-regulated
YAL059W	ECM1	Pre-ribosomal factor involved in 60S ribosomal protein subunit export	-0.218652	0.684265	Not-significant	1.32455	2.04455e-11	Up-regulated
YBR172C	SMY2	GYF domain protein	-0.292944	0.00474468	Significant	1.3231	4.83402e-48	Up-regulated
YHR040W	BCD1	Essential protein required for the accumulation of box C/D snoRNA	-0.0655669	0.901765	Not-significant	1.32003	8.25644e-13	Up-regulated
YPR137W	RRP9	Protein involved in pre-rRNA processing	-0.149438	0.403491	Not-significant	1.31979	1.39579e-34	Up-regulated
YNL075W	IMP4	Component of the SSU processome	-0.269717	0.130488	Not-significant	1.31934	2.23753e-20	Up-regulated
YDR447C	RPS17B	Ribosomal protein 51 (rp51) of the small (40s) subunit	-0.368517	0.0948516	Not-significant	1.31763	6.10798e-25	Up-regulated
YJR063W	RPA12	RNA polymerase I subunit A12.2	-0.201346	0.61794	Not-significant	1.31617	5.86637e-12	Up-regulated
YER132C	PMD1	Protein with an N-terminal kelch-like domain	-0.0593655	0.871619	Not-significant	1.31601	1.4309e-27	Up-regulated
YMR309C	NIP1	eIF3c subunit of the eukaryotic translation initiation factor 3 (eIF3)	-0.058856	0.946265	Not-significant	1.31518	3.35163e-08	Up-regulated
YGR271C-A	EFG1	Essential protein required for maturation of 18S rRNA	-0.318787	0.364246	Not-significant	1.31451	1.74931e-10	Up-regulated
YLR449W	FPR4	Peptidyl-prolyl cis-trans isomerase (PPIase)	-0.0618293	0.899181	Not-significant	1.3139	2.32001e-17	Up-regulated
YGR148C	RPL24B	Ribosomal 60S subunit protein L24B	-0.38167	0.149475	Not-significant	1.31291	8.04353e-15	Up-regulated
YPL266W	DIM1	Essential 18S rRNA dimethylase (dimethyladenosine transferase)	-0.11508	0.775019	Not-significant	1.31204	4.55348e-14	Up-regulated
YGR097W	ASK10	Component of RNA polymerase II holoenzyme	0.136766	0.44757	Not-significant	1.30917	1.11878e-28	Up-regulated
YLR197W	NOP56	Essential evolutionarily-conserved nucleolar protein	-0.121933	0.662255	Not-significant	1.30893	1.51908e-22	Up-regulated
YMR093W	UTP15	Nucleolar protein	-0.122808	0.583221	Not-significant	1.30824	1.01244e-28	Up-regulated
YLR030W	YLR030W	Putative protein of unknown function	0.227218	0.600071	Not-significant	1.30321	4.51146e-06	Up-regulated
YLR226W	BUR2	Cyclin for the Sgv1p (Bur1p) protein kinase	-0.109215	0.828928	Not-significant	1.30307	1.37415e-10	Up-regulated
YLR285C-A	YLR285C-A	Putative protein of unknown function	0.285226	0.844594	Not-significant	1.30152	0.0117715	Up-regulated
YJL136C	RPS21B	Protein component of the small (40S) ribosomal subunit	-0.347213	0.178399	Not-significant	1.29698	2.95322e-13	Up-regulated
YHR203C	RPS4B	Protein component of the small (40S) ribosomal subunit	-0.250463	0.347098	Not-significant	1.29647	8.42114e-19	Up-regulated
YJR145C	RPS4A	Protein component of the small (40S) ribosomal subunit	-0.288289	0.331975	Not-significant	1.29599	1.46635e-14	Up-regulated
YBR189W	RPS9B	Protein component of the small (40S) ribosomal subunit	-0.355044	0.161246	Not-significant	1.29576	8.36706e-15	Up-regulated
YLR388W	RPS29A	Protein component of the small (40S) ribosomal subunit	-0.415689	0.0656098	Not-significant	1.29511	2.54955e-16	Up-regulated
YKL161C	KDX1	Protein kinase	0.212334	0.377236	Not-significant	1.29474	1.1888e-21	Up-regulated
YBR249C	ARO4	3-deoxy-D-arabino-heptulosonate-7-phosphate (DAHP) synthase	-0.446898	0.0686044	Not-significant	1.29424	1.17187e-13	Up-regulated
YLR397C	AFG2	ATPase of the CDC48/PAS1/SEC18 (AAA) family, forms a hexameric complex	0.0129895	0.971645	Not-significant	1.29335	6.3475e-23	Up-regulated
YDR091C	RLI1	Essential Fe-S protein	-0.00891749	0.985985	Not-significant	1.2913	1.12191e-18	Up-regulated
YPR110C	RPC40	RNA polymerase subunit AC40	-0.101098	0.707228	Not-significant	1.28915	6.06644e-22	Up-regulated
YNR058W	BIO3	7,8-diamino-pelargonic acid aminotransferase (DAPA)	-0.167328	0.603735	Not-significant	1.28797	9.03619e-14	Up-regulated
YPL024W	RMI1	Subunit of the RecQ (Sgs1p) - Topo III (Top3p) complex	-0.686431	1.79385e-05	Significant	1.28397	1.65913e-13	Up-regulated
snR44	snR44	H/ACA box small nucleolar RNA (snoRNA)	-0.318263	0.36143	Not-significant	1.28278	2.05927e-06	Up-regulated
YDR234W	LYS4	Homoaconitase	-0.30578	0.208056	Not-significant	1.28249	5.84421e-14	Up-regulated
YGR085C	RPL11B	Ribosomal 60S subunit protein L11B	-0.259275	0.34431	Not-significant	1.27852	2.18605e-15	Up-regulated
YDL182W	LYS20	Homocitrate synthase isozyme and functions in DNA repair	-0.135487	0.864854	Not-significant	1.27764	0.00638628	Up-regulated
YLR185W	RPL37A	Ribosomal 60S subunit protein L37A	-0.3506	0.19927	Not-significant	1.27695	2.33678e-13	Up-regulated
YKR097W	PCK1	Phosphoenolpyruvate carboxykinase	-0.642119	0.448079	Not-significant	1.27383	2.17853e-05	Up-regulated
YPL086C	ELP3	Subunit of Elongator complex	-0.134291	0.472833	Not-significant	1.27342	3.57361e-34	Up-regulated
YBL028C	YBL028C	Protein of unknown function that may interact with ribosomes	-0.266024	0.398606	Not-significant	1.27236	4.5752e-13	Up-regulated
YMR242C	RPL20A	Ribosomal 60S subunit protein L20A	-0.268822	0.298797	Not-significant	1.27132	5.42259e-17	Up-regulated
YOR389W	YOR389W	Putative protein of unknown function	-0.00311164	0.997024	Not-significant	1.27002	8.74898e-09	Up-regulated
YPR145W	ASN1	Asparagine synthetase	-1.12358	3.24278e-17	Down-regulated	1.26892	1.10255e-28	Up-regulated
YLR264W	RPS28B	Protein component of the small (40S) ribosomal subunit	-0.255635	0.413272	Not-significant	1.2687	9.95161e-15	Up-regulated
YHR088W	RPF1	Protein involved in assembly and export of the large ribosomal subunit	-0.206747	0.31612	Not-significant	1.2679	2.80047e-17	Up-regulated
YHR010W	RPL27A	Ribosomal 60S subunit protein L27A	-0.357395	0.102672	Not-significant	1.26673	2.64488e-21	Up-regulated
YAR009C	YAR009C	Retrotransposon TYA Gag and TYB Pol genes	-0.148205	0.633675	Not-significant	1.2654	7.04275e-24	Up-regulated
YLL045C	RPL8B	Ribosomal 60S subunit protein L8B	-0.274402	0.352297	Not-significant	1.2653	1.46555e-15	Up-regulated
YNL162W	RPL42A	Ribosomal 60S subunit protein L42A	-0.434085	0.131528	Not-significant	1.26392	2.21134e-10	Up-regulated
YMR122W-A	YMR122W-A	Protein of unknown function	0.0797676	0.909282	Not-significant	1.25949	7.13366e-10	Up-regulated
YLR014C	PPR1	Zinc finger transcription factor	0.0320387	0.957482	Not-significant	1.25948	3.13031e-15	Up-regulated
YNR038W	DBP6	Essential protein involved in ribosome biogenesis	-0.0299069	0.945983	Not-significant	1.25729	1.67155e-25	Up-regulated
YNL002C	RLP7	Nucleolar protein similar to large ribosomal subunit L7 proteins	-0.110152	0.777896	Not-significant	1.25646	8.24595e-15	Up-regulated
YIL069C	RPS24B	Protein component of the small (40S) ribosomal subunit	-0.261231	0.340713	Not-significant	1.2549	3.83468e-15	Up-regulated
YDL122W	UBP1	Ubiquitin-specific protease	0.0262877	0.9511	Not-significant	1.2511	8.19328e-34	Up-regulated
YGR155W	CYS4	Cystathionine beta-synthase	0.0671151	0.882757	Not-significant	1.25083	2.56468e-24	Up-regulated
YMR175W	SIP18	Phospholipid-binding hydrophilin	0.320586	0.867243	Not-significant	1.25049	0.0222406	Up-regulated
YNR056C	BIO5	Putative transmembrane protein involved in the biotin biosynthesis	-0.355925	0.656569	Not-significant	1.25033	0.00283953	Up-regulated
YLR002C	NOC3	Subunit of a nuclear complex with Noc2p and pre-replicative complexes	-0.0843186	0.844594	Not-significant	1.2501	5.99586e-19	Up-regulated
YPL030W	TRM44	tRNA(Ser) Um(44) 2'-O-methyltransferase	-0.1728	0.351923	Not-significant	1.24644	1.16718e-21	Up-regulated
YLR344W	RPL26A	Ribosomal 60S subunit protein L26A	-0.253878	0.437325	Not-significant	1.24566	2.25618e-12	Up-regulated
YFR055W	IRC7	Beta-lyase involved in the production of thiols	-0.0814729	0.863626	Not-significant	1.24495	1.39805e-13	Up-regulated
YER056C-A	RPL34A	Ribosomal 60S subunit protein L34A	-0.357051	0.239187	Not-significant	1.24325	9.29389e-11	Up-regulated
YDR261C-D	YDR261C-D	Retrotransposon TYA Gag and TYB Pol genes	0.651431	0.641215	Not-significant	1.24289	0.0488756	Up-regulated
YBR031W	RPL4A	Ribosomal 60S subunit protein L4A	-0.0884329	0.888538	Not-significant	1.24197	7.98457e-11	Up-regulated
YMR182C	RGM1	Putative zinc finger DNA binding transcription factor	0.290998	0.233413	Not-significant	1.24195	4.39521e-16	Up-regulated
YKL006W	RPL14A	Ribosomal 60S subunit protein L14A	-0.325235	0.32417	Not-significant	1.23975	2.70595e-11	Up-regulated
YML018C	YML018C	Protein of unknown function	0.0242736	0.968898	Not-significant	1.2387	3.05929e-19	Up-regulated
YLL038C	ENT4	Protein of unknown function	-0.0336288	0.951519	Not-significant	1.23824	2.09415e-14	Up-regulated
YJL010C	NOP9	Essential subunit of U3-containing 90S preribosome	-0.0377284	0.930724	Not-significant	1.23812	8.82114e-16	Up-regulated
YNL110C	NOP15	Constituent of 66S pre-ribosomal particles	-0.117133	0.718349	Not-significant	1.23805	4.54459e-21	Up-regulated
YOL125W	TRM13	2'-O-methyltransferase	-0.177366	0.638444	Not-significant	1.23723	6.87802e-15	Up-regulated
YOR283W	YOR283W	Phosphatase with a broad substrate specificity	0.0693443	0.913767	Not-significant	1.23386	1.19586e-13	Up-regulated
YLL013C	PUF3	Protein of the mitochondrial outer surface	-0.0625846	0.907594	Not-significant	1.23299	2.82132e-09	Up-regulated
YGL135W	RPL1B	Ribosomal 60S subunit protein L1B	-0.26182	0.269745	Not-significant	1.2312	2.11191e-20	Up-regulated
YNL114C	YNL114C	Dubious open reading frame	-0.129757	0.939099	Not-significant	1.23101	0.0171962	Up-regulated
YDR471W	RPL27B	Ribosomal 60S subunit protein L27B	-0.324629	0.19927	Not-significant	1.23013	4.81087e-14	Up-regulated
YOR369C	RPS12	Protein component of the small (40S) ribosomal subunit	-0.363337	0.122212	Not-significant	1.22847	3.89554e-15	Up-regulated
YPL240C	HSP82	Hsp90 chaperone	0.974064	0.000386918	Significant	1.2277	6.56853e-09	Up-regulated
YJL122W	ALB1	Shuttling pre-60S factor	-0.188475	0.656569	Not-significant	1.22359	4.5447e-11	Up-regulated
YJL133W	MRS3	Iron transporter, mediates Fe2+ transport across inner mito membrane	-0.0892309	0.859211	Not-significant	1.2228	6.12288e-13	Up-regulated
YLR048W	RPS0B	Protein component of the small (40S) ribosomal subunit	-0.222676	0.445197	Not-significant	1.22203	2.37897e-16	Up-regulated
YNL113W	RPC19	RNA polymerase subunit AC19	-0.0711774	0.907594	Not-significant	1.2218	3.05657e-11	Up-regulated
YKL056C	TMA19	Protein that associates with ribosomes	-0.281392	0.244981	Not-significant	1.22058	1.46312e-20	Up-regulated
YER002W	NOP16	Constituent of 66S pre-ribosomal particles	-0.0499988	0.930954	Not-significant	1.21964	1.62166e-13	Up-regulated
YBL093C	ROX3	Subunit of the RNA polymerase II mediator complex	0.23115	0.688522	Not-significant	1.21718	6.67517e-08	Up-regulated
YPL081W	RPS9A	Protein component of the small (40S) ribosomal subunit	-0.242176	0.313462	Not-significant	1.21669	9.13532e-18	Up-regulated
YGR061C	ADE6	Formylglycinamidine-ribonucleotide (FGAM)-synthetase	-0.130422	0.629297	Not-significant	1.21668	2.32079e-26	Up-regulated
YCR035C	RRP43	Exosome non-catalytic core component	-0.0746322	0.858867	Not-significant	1.21615	2.4854e-24	Up-regulated
YLR244C	MAP1	Methionine aminopeptidase	0.0779239	0.829665	Not-significant	1.21593	4.12933e-22	Up-regulated
YDL031W	DBP10	Putative ATP-dependent RNA helicase of the DEAD-box protein family	-0.103198	0.699651	Not-significant	1.21574	1.9693e-30	Up-regulated
YOR134W	BAG7	Rho GTPase activating protein (RhoGAP)	0.385285	0.386235	Not-significant	1.21572	3.23315e-08	Up-regulated
YGR038C-B	YGR038C-B	Retrotransposon TYA Gag and TYB Pol genes	-0.117537	0.807031	Not-significant	1.21554	7.45574e-12	Up-regulated
YKL014C	URB1	Protein required for the normal accumulation of 25S and 5.8S rRNAs	-0.222163	0.707228	Not-significant	1.21551	5.1768e-06	Up-regulated
YER131W	RPS26B	Protein component of the small (40S) ribosomal subunit	-0.364306	0.166914	Not-significant	1.2133	1.26349e-13	Up-regulated
YJR094W-A	RPL43B	Ribosomal 60S subunit protein L43B	-0.366895	0.263174	Not-significant	1.21146	9.98592e-10	Up-regulated
YKL180W	RPL17A	Ribosomal 60S subunit protein L17A	-0.264011	0.392138	Not-significant	1.21049	7.74696e-14	Up-regulated
YLR325C	RPL38	Ribosomal 60S subunit protein L38	-0.294976	0.313462	Not-significant	1.20965	1.65913e-13	Up-regulated
YDR025W	RPS11A	Protein component of the small (40S) ribosomal subunit	-0.222657	0.497249	Not-significant	1.20922	2.55804e-13	Up-regulated
YPR011C	YPR011C	Mitochondrial transporter	-0.122917	0.762324	Not-significant	1.20749	2.14309e-12	Up-regulated
YML026C	RPS18B	Protein component of the small (40S) ribosomal subunit	-0.396937	0.037624	Significant	1.20708	4.17367e-18	Up-regulated
YBL081W	YBL081W	Non-essential protein of unknown function	-0.100901	0.679445	Not-significant	1.2068	5.78958e-32	Up-regulated
YAL019W	FUN30	Snf2p family member with ATP-dependent chromatin remodeling activity	-0.0777646	0.797303	Not-significant	1.20559	1.84682e-22	Up-regulated
YDL150W	RPC53	RNA polymerase III subunit C53	-0.135323	0.643051	Not-significant	1.20464	1.5699e-20	Up-regulated
YOL055C	THI20	Trifunctional enzyme of thiamine biosynthesis, degradation and salvage	0.154291	0.703499	Not-significant	1.2038	4.73572e-14	Up-regulated
YNL207W	RIO2	Essential serine kinase involved in the processing of 20S pre-rRNA	-0.174316	0.314233	Not-significant	1.20371	9.06356e-18	Up-regulated
YML063W	RPS1B	Ribosomal protein 10 (rp10) of the small (40S) subunit	-0.275707	0.322003	Not-significant	1.20356	3.49664e-14	Up-regulated
YML116W	ATR1	Multidrug efflux pump of the major facilitator superfamily	-0.160666	0.671817	Not-significant	1.2012	3.71358e-13	Up-regulated
YIL073C	SPO22	Meiosis-specific protein essential for chromosome synapsis	-0.387811	0.449478	Not-significant	1.19841	0.0012766	Up-regulated
YMR310C	YMR310C	Putative methyltransferase	-0.00126525	0.998336	Not-significant	1.19828	9.27247e-16	Up-regulated
YJR119C	JHD2	JmjC domain family histone demethylase	-0.00820423	0.991489	Not-significant	1.19825	8.63601e-17	Up-regulated
YOL045W	PSK2	PAS-domain containing serine/threonine protein kinase	0.242457	0.32417	Not-significant	1.19752	4.26757e-25	Up-regulated
YCR047C	BUD23	Methyltransferase	-0.108748	0.809499	Not-significant	1.19699	2.11423e-11	Up-regulated
YMR147W	YMR147W	Putative protein of unknown function	0.216113	0.386361	Not-significant	1.19615	3.14506e-11	Up-regulated
YFR032C-A	RPL29	Ribosomal 60S subunit protein L29	-0.353406	0.260374	Not-significant	1.19489	1.11407e-11	Up-regulated
YFR032C-B	YFR032C-B	Putative protein of unknown function	-0.173746	0.918014	Not-significant	1.19377	0.0325757	Up-regulated
YLL011W	SOF1	Protein required for biogenesis of 40S (small) ribosomal subunit	-0.122076	0.606913	Not-significant	1.19102	1.4703e-26	Up-regulated
YER167W	BCK2	Serine/threonine-rich protein involved in PKC1 signaling pathway	0.104063	0.604628	Not-significant	1.18878	1.04648e-25	Up-regulated
YER102W	RPS8B	Protein component of the small (40S) ribosomal subunit	-0.345834	0.241268	Not-significant	1.1884	2.1596e-11	Up-regulated
YPL131W	RPL5	Ribosomal 60S subunit protein L5	-0.132842	0.711947	Not-significant	1.1882	7.55723e-18	Up-regulated
YDL111C	RRP42	Exosome non-catalytic core component	-0.119034	0.699979	Not-significant	1.18705	1.36801e-23	Up-regulated
YLR293C	GSP1	Ran GTPase	-0.121106	0.790481	Not-significant	1.18606	1.92012e-11	Up-regulated
YDR533C	HSP31	Methylglyoxalase that converts methylglyoxal to D-lactate	0.690352	0.000201389	Significant	1.18573	8.66869e-07	Up-regulated
YOL077C	BRX1	Nucleolar protein	-0.268471	0.139052	Not-significant	1.18193	4.05922e-17	Up-regulated
YLR035C-A	YLR035C-A	Retrotransposon TYA Gag and TYB Pol genes	-0.261825	0.606913	Not-significant	1.18169	6.3305e-10	Up-regulated
YEL055C	POL5	DNA Polymerase phi	-0.159638	0.624039	Not-significant	1.18038	2.10125e-15	Up-regulated
YDR119W	VBA4	Protein of unknown function	-0.159719	0.384335	Not-significant	1.17823	4.38281e-23	Up-regulated
YNL163C	RIA1	Cytoplasmic GTPase/eEF2-like factor involved in ribosomal biogenesis	0.0456121	0.9123	Not-significant	1.17713	1.74774e-25	Up-regulated
YJR124C	YJR124C	Putative protein of unknown function	-0.281965	0.11779	Not-significant	1.177	7.32202e-15	Up-regulated
YLR017W	MEU1	Methylthioadenosine phosphorylase (MTAP)	-6.19105e-05	0.999912	Not-significant	1.17564	5.12072e-11	Up-regulated
YGL162W	SUT1	Transcription factor of the Zn(II)2Cys6 family	-0.0729396	0.914401	Not-significant	1.1752	4.92251e-09	Up-regulated
YOR078W	BUD21	Component of small ribosomal subunit (SSU) processosome	-0.188482	0.394771	Not-significant	1.17456	1.18189e-18	Up-regulated
YLR329W	REC102	Protein involved in early stages of meiotic recombination	0.17286	0.898064	Not-significant	1.17318	0.0147631	Up-regulated
YBR048W	RPS11B	Protein component of the small (40S) ribosomal subunit	-0.296981	0.232029	Not-significant	1.17279	1.95368e-13	Up-regulated
YDR210C-D	YDR210C-D	Retrotransposon TYA Gag and TYB Pol genes	0.118774	0.819935	Not-significant	1.17244	4.58719e-10	Up-regulated
YLR056W	ERG3	C-5 sterol desaturase	0.142639	0.684265	Not-significant	1.17193	1.94482e-11	Up-regulated
RUF5-2	RUF5-2	RNA of Unknown Function	0.242909	0.731904	Not-significant	1.17145	5.25792e-05	Up-regulated
YOL040C	RPS15	Protein component of the small (40S) ribosomal subunit	-0.271903	0.423283	Not-significant	1.17118	2.66677e-10	Up-regulated
YJL208C	NUC1	Major mitochondrial nuclease	-0.321415	0.206724	Not-significant	1.1709	2.23251e-13	Up-regulated
YER169W	RPH1	JmjC domain-containing histone demethylase	0.0811008	0.769137	Not-significant	1.17037	2.71031e-25	Up-regulated
YHR003C	YHR003C	tRNA threonylcarbamoyladenosine dehydratase	-0.127212	0.776683	Not-significant	1.17001	2.34083e-12	Up-regulated
YEL048C	TCA17	Component of transport protein particle (TRAPP) complex II	-0.083051	0.938602	Not-significant	1.16962	6.6789e-05	Up-regulated
YOL039W	RPP2A	Ribosomal protein P2 alpha	-0.295938	0.369242	Not-significant	1.16841	2.39323e-10	Up-regulated
YDL205C	HEM3	Porphobilinogen deaminase	-0.623818	0.0156047	Significant	1.16777	2.44166e-10	Up-regulated
YBR025C	OLA1	P-loop ATPase with similarity to human OLA1 and bacterial YchF	0.0526209	0.862643	Not-significant	1.16647	2.18151e-29	Up-regulated
YHL015W	RPS20	Protein component of the small (40S) ribosomal subunit	-0.305297	0.214095	Not-significant	1.16614	1.1977e-15	Up-regulated
YGR239C	PEX21	Peroxin required for peroxisomal matrix protein targeting	0.0130449	0.985985	Not-significant	1.16398	7.50834e-11	Up-regulated
YLR075W	RPL10	Ribosomal 60S subunit protein L10	-0.212147	0.560035	Not-significant	1.16148	3.41327e-11	Up-regulated
YAL012W	CYS3	Cystathionine gamma-lyase	0.287458	0.180795	Not-significant	1.16116	3.09399e-10	Up-regulated
YCR073C	SSK22	MAP kinase kinase kinase of HOG1 mitogen-activated signaling pathway	0.337725	0.118009	Not-significant	1.15961	1.78367e-22	Up-regulated
YKR060W	UTP30	Putative subunit of U3-containing 90S preribosome complex	-0.022623	0.961157	Not-significant	1.15902	1.14464e-11	Up-regulated
YOR128C	ADE2	Phosphoribosylaminoimidazole carboxylase	0.215207	0.488881	Not-significant	1.15828	1.6468e-15	Up-regulated
YNL308C	KRI1	Essential nucleolar protein required for 40S ribosome biogenesis	-0.132268	0.682948	Not-significant	1.15739	7.94237e-15	Up-regulated
YBL033C	RIB1	GTP cyclohydrolase II	0.0345451	0.961137	Not-significant	1.15695	1.13164e-09	Up-regulated
YLR406C	RPL31B	Ribosomal 60S subunit protein L31B	-0.336012	0.295561	Not-significant	1.155	2.68959e-09	Up-regulated
YOR343C	YOR343C	Dubious open reading frame	-1.12925	0.00374862	Down-regulated	1.15483	1.44449e-05	Up-regulated
YJL125C	GCD14	Subunit of tRNA (1-methyladenosine) methyltransferase	-0.0202447	0.967197	Not-significant	1.15411	1.99996e-18	Up-regulated
YBR191W	RPL21A	Ribosomal 60S subunit protein L21A	-0.28129	0.361284	Not-significant	1.15387	1.206e-11	Up-regulated
YNL061W	NOP2	rRNA m5C methyltransferase	-0.107555	0.731904	Not-significant	1.15205	2.60405e-22	Up-regulated
YNL191W	DUG3	Component of glutamine amidotransferase (GATase II)	0.302922	0.318866	Not-significant	1.15108	2.15602e-14	Up-regulated
YNL269W	BSC4	Protein of unknown function	0.233067	0.844594	Not-significant	1.15026	0.0250028	Up-regulated
YBR032W	YBR032W	Dubious open reading frame	-0.255025	0.86839	Not-significant	1.14994	0.021747	Up-regulated
YGL103W	RPL28	Ribosomal 60S subunit protein L28	-0.21994	0.543335	Not-significant	1.1496	4.90189e-13	Up-regulated
YLR031W	YLR031W	Putative protein of unknown function	0.080238	0.941586	Not-significant	1.14944	0.00193433	Up-regulated
YER086W	ILV1	Threonine deaminase, catalyzes first step in isoleucine biosynthesis	0.0479563	0.938237	Not-significant	1.14871	1.2051e-14	Up-regulated
YOR012W	YOR012W	Putative protein of unknown function	-0.124098	0.914831	Not-significant	1.14833	0.00249891	Up-regulated
YNR027W	BUD17	Putative pyridoxal kinase	-0.0421729	0.958303	Not-significant	1.1464	1.43272e-08	Up-regulated
YNL187W	SWT21	Protein involved in mRNA splicing	0.0725172	0.914698	Not-significant	1.14584	1.86144e-08	Up-regulated
YLR342W	FKS1	Catalytic subunit of 1,3-beta-D-glucan synthase	-0.0611713	0.93392	Not-significant	1.14472	9.46896e-09	Up-regulated
YPL079W	RPL21B	Ribosomal 60S subunit protein L21B	-0.282089	0.315413	Not-significant	1.14264	4.64939e-13	Up-regulated
YDR012W	RPL4B	Ribosomal 60S subunit protein L4B	-0.213574	0.570854	Not-significant	1.14055	5.327e-11	Up-regulated
YOR116C	RPO31	RNA polymerase III largest subunit C160	-0.093882	0.791944	Not-significant	1.14049	1.67251e-21	Up-regulated
YPL249C-A	RPL36B	Ribosomal 60S subunit protein L36B	-0.348503	0.240367	Not-significant	1.14046	4.45585e-10	Up-regulated
YML096W	YML096W	Putative protein with similarity to asparagine synthetases	-0.205788	0.276663	Not-significant	1.14037	5.71946e-18	Up-regulated
YNL053W	MSG5	Dual-specificity protein phosphatase	0.0137107	0.97237	Not-significant	1.14002	1.64423e-18	Up-regulated
YGL169W	SUA5	Protein involved in threonylcarbamoyl adenosine biosynthesis	-0.138698	0.481873	Not-significant	1.13875	6.55492e-13	Up-regulated
YML045W	YML045W	Retrotransposon TYA Gag and TYB Pol genes	-0.851191	0.0065194	Significant	1.13862	3.09399e-10	Up-regulated
YIL130W	ASG1	Zinc cluster protein proposed to be a transcriptional regulator	-0.06075	0.910427	Not-significant	1.13852	2.26088e-13	Up-regulated
YPL193W	RSA1	Protein involved in the assembly of 60S ribosomal subunits	0.00554808	0.991489	Not-significant	1.13818	7.93415e-19	Up-regulated
YIL052C	RPL34B	Ribosomal 60S subunit protein L34B	-0.291993	0.369242	Not-significant	1.13595	2.36636e-09	Up-regulated
YNR067C	DSE4	Daughter cell-specific secreted protein with similarity to glucanases	0.312273	0.112639	Not-significant	1.13325	1.86085e-09	Up-regulated
YLR435W	TSR2	Protein with a potential role in pre-rRNA processing	-0.177395	0.600524	Not-significant	1.13258	7.60783e-11	Up-regulated
YJR111C	YJR111C	Putative protein of unknown function	-0.0216857	0.964478	Not-significant	1.13254	1.5151e-17	Up-regulated
YKL082C	RRP14	Essential protein, constituent of 66S pre-ribosomal particles	-0.216628	0.402737	Not-significant	1.13125	1.23382e-14	Up-regulated
YPR190C	RPC82	RNA polymerase III subunit C82	-0.48809	1.19326e-05	Significant	1.13107	1.19012e-28	Up-regulated
YLR068W	FYV7	Essential protein required for maturation of 18S rRNA	-0.343858	0.195206	Not-significant	1.13066	4.59382e-10	Up-regulated
YBR154C	RPB5	RNA polymerase subunit ABC27	-0.124732	0.693712	Not-significant	1.12936	1.48905e-18	Up-regulated
YIL009W	FAA3	Long chain fatty acyl-CoA synthetase	-0.473153	0.0686284	Not-significant	1.12826	6.2029e-11	Up-regulated
YPL110C	GDE1	Glycerophosphocholine (GroPCho) phosphodiesterase	0.229655	0.330027	Not-significant	1.12817	7.24383e-20	Up-regulated
YJR056C	YJR056C	Protein of unknown function	-0.139781	0.673424	Not-significant	1.12752	3.67653e-14	Up-regulated
YNR046W	TRM112	Protein involved in methylation of tRNA, rRNA, and translation factors	-0.137799	0.805977	Not-significant	1.12592	4.81965e-08	Up-regulated
YBR069C	TAT1	Amino acid transporter for valine, leucine, isoleucine, and tyrosine	-0.0011188	0.997596	Not-significant	1.12545	8.62954e-18	Up-regulated
YPL278C	YPL278C	Putative protein of unknown function	-0.13777	0.769137	Not-significant	1.12381	2.18857e-07	Up-regulated
YOL052C-A	DDR2	Multi-stress response protein	0.351443	0.109159	Not-significant	1.12169	3.76059e-12	Up-regulated
YHR019C	DED81	Cytosolic asparaginyl-tRNA synthetase	-0.335086	0.0351526	Significant	1.11924	1.05442e-17	Up-regulated
YBL087C	RPL23A	Ribosomal 60S subunit protein L23A	-0.311776	0.300476	Not-significant	1.11913	8.07402e-11	Up-regulated
YAL038W	CDC19	Pyruvate kinase	0.138903	0.660749	Not-significant	1.11829	4.15595e-13	Up-regulated
YCL059C	KRR1	Nucleolar protein required for rRNA synthesis and ribosomal assembly	-0.173553	0.586445	Not-significant	1.1178	6.43888e-14	Up-regulated
YOL121C	RPS19A	Protein component of the small (40S) ribosomal subunit	-0.316028	0.307302	Not-significant	1.11474	2.60814e-10	Up-regulated
YOR264W	DSE3	Daughter cell-specific protein, may help establish daughter fate	0.447523	0.000268321	Significant	1.11455	3.99946e-12	Up-regulated
YFL003C	MSH4	Protein involved in meiotic recombination	-0.163292	0.85309	Not-significant	1.11417	0.000136667	Up-regulated
YOR243C	PUS7	Pseudouridine synthase	-0.103836	0.688253	Not-significant	1.11402	1.12883e-27	Up-regulated
YFL002W-A	YFL002W-A	Retrotransposon TYA Gag and TYB Pol genes	0.0116319	0.982735	Not-significant	1.11128	4.10082e-18	Up-regulated
YNR054C	ESF2	Essential nucleolar protein involved in pre-18S rRNA processing	-0.038784	0.940564	Not-significant	1.11108	2.72877e-13	Up-regulated
YMR246W	FAA4	Long chain fatty acyl-CoA synthetase	0.0415422	0.961157	Not-significant	1.11018	9.08797e-09	Up-regulated
YKR042W	UTH1	Mitochondrial inner membrane protein	-0.267121	0.275273	Not-significant	1.10963	1.56741e-13	Up-regulated
YDR382W	RPP2B	Ribosomal protein P2 beta	-0.309516	0.306285	Not-significant	1.10926	3.57115e-09	Up-regulated
snR33	snR33	H/ACA box small nucleolar RNA (snoRNA)	-0.34427	0.205306	Not-significant	1.10912	9.99509e-08	Up-regulated
YDL213C	NOP6	rRNA-binding protein required for 40S ribosomal subunit biogenesis	-0.0963388	0.874614	Not-significant	1.10892	6.33897e-07	Up-regulated
YJL188C	YJL188C	Dubious open reading frame; unlikely to encode a functional protein	-0.347575	0.793794	Not-significant	1.10889	0.0395492	Up-regulated
YML121W	GTR1	Cytoplasmic GTPase	0.316344	0.0325295	Significant	1.1074	1.19877e-14	Up-regulated
YCR021C	HSP30	Negative regulator of the H(+)-ATPase Pma1p	0.43409	0.688522	Not-significant	1.10719	0.000671064	Up-regulated
YPL089C	RLM1	MADS-box transcription factor	0.100682	0.747355	Not-significant	1.10647	1.14774e-22	Up-regulated
YFL023W	BUD27	Unconventional prefoldin protein involved in translation initiation	-0.0413205	0.915452	Not-significant	1.10643	1.39212e-22	Up-regulated
YKL023C-A	YKL023C-A	Putative protein of unknown function	-0.308926	0.251228	Not-significant	1.10562	2.76005e-10	Up-regulated
YKL027W	YKL027W	tRNA threonylcarbamoyladenosine dehydratase	0.0748082	0.911399	Not-significant	1.10289	1.04105e-10	Up-regulated
YER150W	SPI1	GPI-anchored cell wall protein involved in weak acid resistance	0.673293	6.78199e-07	Significant	1.10268	5.27425e-15	Up-regulated
YKR072C	SIS2	Negative regulatory subunit of protein phosphatase 1 (Ppz1p)	-0.0967191	0.73664	Not-significant	1.10209	5.96505e-17	Up-regulated
YBL068W	PRS4	5-phospho-ribosyl-1(alpha)-pyrophosphate synthetase, synthesizes PRPP	-0.287656	0.0263734	Significant	1.10187	6.00831e-22	Up-regulated
YGL076C	RPL7A	Ribosomal 60S subunit protein L7A	-0.375358	0.147889	Not-significant	1.10186	4.41932e-11	Up-regulated
YOR063W	RPL3	Ribosomal 60S subunit protein L3	-0.225114	0.50485	Not-significant	1.10142	1.06011e-10	Up-regulated
YDL083C	RPS16B	Protein component of the small (40S) ribosomal subunit	-0.323987	0.287556	Not-significant	1.09973	7.43554e-10	Up-regulated
YPL199C	YPL199C	Putative protein of unknown function	-0.334321	0.361269	Not-significant	1.09971	1.1945e-07	Up-regulated
YBR248C	HIS7	Imidazole glycerol phosphate synthase	-0.116793	0.670044	Not-significant	1.09962	7.53381e-23	Up-regulated
YNL123W	NMA111	Serine protease and general molecular chaperone	0.141258	0.641215	Not-significant	1.09942	3.90269e-19	Up-regulated
YOL120C	RPL18A	Ribosomal 60S subunit protein L18A	-0.253671	0.413541	Not-significant	1.09876	5.39551e-11	Up-regulated
YDR249C	YDR249C	Putative protein of unknown function	-0.252796	0.715985	Not-significant	1.09858	0.000107131	Up-regulated
YIL133C	RPL16A	Ribosomal 60S subunit protein L16A	-0.262372	0.125772	Not-significant	1.09795	1.76181e-19	Up-regulated
YBL024W	NCL1	S-adenosyl-L-methionine-dependent tRNA: m5C-methyltransferase	-0.100698	0.769189	Not-significant	1.09726	4.30306e-19	Up-regulated
YNL327W	EGT2	Glycosylphosphatidylinositol (GPI)-anchored cell wall endoglucanase	0.458595	2.68422e-08	Significant	1.09711	1.03277e-14	Up-regulated
YJR002W	MPP10	Component of the SSU processome and 90S preribosome	-0.0822708	0.780374	Not-significant	1.09668	7.24396e-21	Up-regulated
YIL047C-A	YIL047C-A	Dubious open reading frame	-0.2186	0.740523	Not-significant	1.09648	0.000181525	Up-regulated
YGL102C	YGL102C	Dubious open reading frame unlikely to encode a functional protein	-0.521024	0.594064	Not-significant	1.09597	0.0401519	Up-regulated
YDL201W	TRM8	Noncatalytic subunit of a tRNA methyltransferase complex	-0.240057	0.402737	Not-significant	1.09446	1.08158e-11	Up-regulated
YJL189W	RPL39	Ribosomal 60S subunit protein L39	-0.440624	0.0408439	Significant	1.0941	8.23e-15	Up-regulated
YER088C	DOT6	Protein involved in rRNA and ribosome biogenesis	-0.0281993	0.949985	Not-significant	1.09379	9.96463e-14	Up-regulated
YDL055C	PSA1	GDP-mannose pyrophosphorylase (mannose-1-phosphate guanyltransferase)	0.0983266	0.853611	Not-significant	1.09376	2.72639e-08	Up-regulated
YIL018W	RPL2B	Ribosomal 60S subunit protein L2B	-0.280588	0.358732	Not-significant	1.09338	1.51567e-10	Up-regulated
YOR335C	ALA1	Cytoplasmic and mitochondrial alanyl-tRNA synthetase	-0.154143	0.442029	Not-significant	1.09331	7.20528e-28	Up-regulated
YGR260W	TNA1	High affinity nicotinic acid plasma membrane permease	-0.50473	0.0599841	Not-significant	1.09309	2.48096e-09	Up-regulated
YOR107W	RGS2	Negative regulator of glucose-induced cAMP signaling	0.214081	0.66148	Not-significant	1.09269	5.59157e-10	Up-regulated
YMR259C	YMR259C	Protein that interacts with Trm7p for 2'-O-methylation of C32 of subs	-0.0750031	0.928247	Not-significant	1.09036	1.45208e-05	Up-regulated
YML073C	RPL6A	Ribosomal 60S subunit protein L6A	-0.343183	0.134849	Not-significant	1.08682	7.24565e-12	Up-regulated
YFL001W	DEG1	tRNA:pseudouridine synthase	0.392779	0.0479893	Significant	1.08597	1.35502e-18	Up-regulated
YPL090C	RPS6A	Protein component of the small (40S) ribosomal subunit	-0.379795	0.142618	Not-significant	1.08073	1.87394e-10	Up-regulated
YGL081W	YGL081W	Putative protein of unknown function	-0.128058	0.862643	Not-significant	1.08031	1.09204e-05	Up-regulated
YBR106W	PHO88	Probable membrane protein	-0.0893718	0.912611	Not-significant	1.07925	2.78856e-06	Up-regulated
YOR293W	RPS10A	Protein component of the small (40S) ribosomal subunit	-0.374746	0.0706411	Not-significant	1.07792	5.96505e-17	Up-regulated
YGR095C	RRP46	Exosome non-catalytic core component	0.00103834	0.998708	Not-significant	1.07594	1.54608e-13	Up-regulated
YGL099W	LSG1	Putative GTPase involved in 60S ribosomal subunit biogenesis	-0.177038	0.283466	Not-significant	1.07518	3.71368e-26	Up-regulated
YGL123W	RPS2	Protein component of the small (40S) subunit	-0.310512	0.227564	Not-significant	1.07507	5.95872e-12	Up-regulated
YOL127W	RPL25	Ribosomal 60S subunit protein L25	-0.312716	0.319149	Not-significant	1.0746	1.17482e-09	Up-regulated
YHL036W	MUP3	Low affinity methionine permease	0.295484	0.650328	Not-significant	1.07455	0.000699977	Up-regulated
YHR049W	FSH1	Putative serine hydrolase	-0.0771534	0.865711	Not-significant	1.07286	2.74202e-10	Up-regulated
YNR015W	SMM1	Dihydrouridine synthase	-0.128376	0.720988	Not-significant	1.07075	5.2857e-11	Up-regulated
YDL208W	NHP2	Protein related to mammalian high mobility group (HMG) proteins	-0.271093	0.433275	Not-significant	1.06972	1.45326e-09	Up-regulated
YDR075W	PPH3	Catalytic subunit of protein phosphatase PP4 complex	0.0346198	0.943125	Not-significant	1.06851	1.49273e-11	Up-regulated
YDL133C-A	RPL41B	Ribosomal 60S subunit protein L41B	-0.454332	0.162265	Not-significant	1.06756	5.17853e-08	Up-regulated
YDL075W	RPL31A	Ribosomal 60S subunit protein L31A	-0.332816	0.296047	Not-significant	1.06626	6.33229e-09	Up-regulated
YDR098C-A	YDR098C-A	Retrotransposon TYA Gag gene co-transcribed with TYB Pol	0.133443	0.881722	Not-significant	1.06387	0.0153976	Up-regulated
YPL160W	CDC60	Cytosolic leucyl tRNA synthetase	-0.130638	0.545483	Not-significant	1.06346	4.19909e-27	Up-regulated
YJL177W	RPL17B	Ribosomal 60S subunit protein L17B	-0.303621	0.32384	Not-significant	1.06309	3.11867e-10	Up-regulated
YAL003W	EFB1	Translation elongation factor 1 beta	-0.0480743	0.943125	Not-significant	1.06232	7.29221e-10	Up-regulated
YGR173W	RBG2	Protein with a role in translation	-0.044649	0.933046	Not-significant	1.05972	9.40428e-11	Up-regulated
YDR110W	FOB1	Nucleolar protein that binds the rDNA replication fork barrier site	-0.257499	0.109481	Not-significant	1.05859	2.0417e-22	Up-regulated
YML089C	YML089C	Dubious open reading frame	-2.36248	1.05486e-09	Down-regulated	1.05746	0.000113933	Up-regulated
snR30	snR30	H/ACA box small nucleolar RNA (snoRNA)	0.254839	0.688522	Not-significant	1.05715	0.000437325	Up-regulated
YIL103W	DPH1	Protein required for synthesis of diphthamide	-0.0175456	0.968898	Not-significant	1.05555	4.82455e-18	Up-regulated
YBR239C	ERT1	Transcriptional regulator	0.122945	0.741929	Not-significant	1.05508	6.02141e-14	Up-regulated
YNL023C	FAP1	Protein that binds to Fpr1p	0.0456636	0.917253	Not-significant	1.05335	2.20882e-14	Up-regulated
YGL215W	CLG1	Cyclin-like protein that interacts with Pho85p	-0.0237051	0.965688	Not-significant	1.05274	5.23424e-15	Up-regulated
YPL211W	NIP7	Nucleolar protein required for 60S ribosome subunit biogenesis	-0.14946	0.574818	Not-significant	1.05159	9.75801e-17	Up-regulated
YER117W	RPL23B	Ribosomal 60S subunit protein L23B	-0.418295	0.0982948	Not-significant	1.0515	2.4862e-10	Up-regulated
YLR186W	EMG1	Methyltransferase for rRNA	-0.127289	0.660749	Not-significant	1.05141	5.20534e-16	Up-regulated
YHR021C	RPS27B	Protein component of the small (40S) ribosomal subunit	-0.236271	0.383365	Not-significant	1.05086	4.95533e-13	Up-regulated
snR18	snR18	C/D box small nucleolar RNA (snoRNA)	-0.320483	0.546573	Not-significant	1.05047	1.89737e-05	Up-regulated
YML080W	DUS1	Dihydrouridine synthase	0.0259866	0.959265	Not-significant	1.04902	1.93225e-14	Up-regulated
YGL030W	RPL30	Ribosomal 60S subunit protein L30	-0.317226	0.342105	Not-significant	1.04577	3.40871e-08	Up-regulated
YBL092W	RPL32	Ribosomal 60S subunit protein L32	-0.316108	0.310944	Not-significant	1.04554	1.81738e-09	Up-regulated
YER074W	RPS24A	Protein component of the small (40S) ribosomal subunit	-0.321797	0.327154	Not-significant	1.04288	2.53069e-08	Up-regulated
YLR051C	FCF2	Nucleolar protein involved in the early steps of 35S rRNA processing	-0.149459	0.60413	Not-significant	1.04235	5.82367e-15	Up-regulated
YLR029C	RPL15A	Ribosomal 60S subunit protein L15A	-0.165201	0.682537	Not-significant	1.04078	7.93213e-09	Up-regulated
YHR065C	RRP3	Protein involved in rRNA processing	-0.115196	0.49248	Not-significant	1.04055	1.4629e-26	Up-regulated
YHR046C	INM1	Inositol monophosphatase	-0.185047	0.688522	Not-significant	1.04018	2.87346e-08	Up-regulated
YNL022C	YNL022C	rRNA m5C methyltransferase	-0.0645755	0.867641	Not-significant	1.03953	1.13269e-18	Up-regulated
YHR052W-A	YHR052W-A	Dubious open reading frame	0.395207	0.37993	Not-significant	1.03606	0.00255568	Up-regulated
YKL185W	ASH1	Component of the Rpd3L histone deacetylase complex	0.388025	0.00280825	Significant	1.03535	5.60304e-17	Up-regulated
YJL052W	TDH1	Glyceraldehyde-3-phosphate dehydrogenase (GAPDH), isozyme 1	0.407325	0.046912	Significant	1.03517	1.52319e-10	Up-regulated
YOL059W	GPD2	NAD-dependent glycerol 3-phosphate dehydrogenase	0.0344087	0.958407	Not-significant	1.03474	2.39915e-09	Up-regulated
YOL093W	TRM10	tRNA methyltransferase	-0.210691	0.497327	Not-significant	1.03386	2.62074e-11	Up-regulated
YKR106W	GEX2	Proton:glutathione antiporter	-0.022376	0.988275	Not-significant	1.03248	0.0246056	Up-regulated
YDR034C-D	YDR034C-D	Retrotransposon TYA Gag and TYB Pol genes	0.152877	0.754121	Not-significant	1.03207	7.70929e-09	Up-regulated
YNL227C	JJJ1	Co-chaperone that stimulates the ATPase activity of Ssa1p	0.028023	0.960774	Not-significant	1.03065	4.54638e-10	Up-regulated
YMR132C	JLP2	Protein of unknown function	0.0509519	0.946265	Not-significant	1.02933	8.44177e-07	Up-regulated
YLR318W	EST2	Reverse transcriptase subunit of the telomerase holoenzyme	-0.012793	0.991489	Not-significant	1.02849	0.000592857	Up-regulated
YGR060W	ERG25	C-4 methyl sterol oxidase	0.170693	0.471791	Not-significant	1.02656	2.84721e-13	Up-regulated
YBR092C	PHO3	Constitutively expressed acid phosphatase similar to Pho5p	0.603337	0.000378181	Significant	1.02537	1.37324e-09	Up-regulated
YNL178W	RPS3	Protein component of the small (40S) ribosomal subunit	-0.294059	0.377455	Not-significant	1.02381	2.38758e-08	Up-regulated
YLR259C	HSP60	Tetradecameric mitochondrial chaperonin	0.671681	5.13485e-06	Significant	1.02325	1.21847e-16	Up-regulated
YKL065W-A	YKL065W-A	Putative protein of unknown function	0.328669	0.661771	Not-significant	1.02305	0.00122936	Up-regulated
YDR361C	BCP1	Essential protein involved in nuclear export of Mss4p	-0.166378	0.568194	Not-significant	1.02124	2.13561e-11	Up-regulated
YGR093W	YGR093W	Splicing factor that modulates turnover of branched RNAs by Dbr1p	-0.147838	0.612422	Not-significant	1.02093	1.52142e-16	Up-regulated
YGR151C	YGR151C	Dubious open reading frame	0.244972	0.393236	Not-significant	1.01961	1.43492e-06	Up-regulated
YIL148W	RPL40A	Ubiquitin-ribosomal 60S subunit protein L40A fusion protein	-0.285162	0.276505	Not-significant	1.01852	4.15894e-12	Up-regulated
YGR161C-D	YGR161C-D	Retrotransposon TYA Gag and TYB Pol genes	-0.111911	0.946722	Not-significant	1.01824	0.00278921	Up-regulated
YDR020C	DAS2	Putative protein of unknown function	-0.295817	0.20052	Not-significant	1.01742	3.70988e-07	Up-regulated
YIL067C	YIL067C	Uncharacterized protein of unknown function	-0.13505	0.449613	Not-significant	1.01719	5.0352e-18	Up-regulated
YDR420W	HKR1	Mucin family member that functions as an osmosensor in the HOG pathway	-0.000611192	0.999766	Not-significant	1.01699	1.0031e-06	Up-regulated
YGL031C	RPL24A	Ribosomal 60S subunit protein L24A	-0.356515	0.170468	Not-significant	1.0167	2.55352e-10	Up-regulated
YDL170W	UGA3	Transcriptional activator for GABA-dependent induction of GABA genes	-0.0983594	0.704711	Not-significant	1.01596	4.93888e-23	Up-regulated
YOR096W	RPS7A	Protein component of the small (40S) ribosomal subunit	-0.344116	0.154201	Not-significant	1.01432	1.33692e-13	Up-regulated
YDR253C	MET32	Zinc-finger DNA-binding transcription factor	0.462979	0.489294	Not-significant	1.01308	0.00817351	Up-regulated
YDR211W	GCD6	Catalytic epsilon subunit of the translation initiation factor eIF2B	0.0159273	0.964365	Not-significant	1.01171	1.93225e-14	Up-regulated
YML022W	APT1	Adenine phosphoribosyltransferase	-0.188214	0.560298	Not-significant	1.01126	1.17147e-12	Up-regulated
YDR418W	RPL12B	Ribosomal 60S subunit protein L12B	-0.261553	0.340316	Not-significant	1.00987	4.56553e-10	Up-regulated
YMR189W	GCV2	P subunit of the mitochondrial glycine decarboxylase complex	0.136259	0.840349	Not-significant	1.00928	8.67123e-06	Up-regulated
YCR018C-A	YCR018C-A	Putative protein of unknown function	-0.158331	0.920688	Not-significant	1.0091	0.029941	Up-regulated
YIL047C	SYG1	Plasma membrane protein of unknown function	-0.0763669	0.775186	Not-significant	1.0072	1.12608e-20	Up-regulated
YNL299W	TRF5	Non-canonical poly(A) polymerase	-0.0213543	0.959197	Not-significant	1.00536	1.43414e-19	Up-regulated
YMR143W	RPS16A	Protein component of the small (40S) ribosomal subunit	-0.34086	0.109694	Not-significant	1.00439	3.05676e-11	Up-regulated
YOR027W	STI1	Hsp90 cochaperone	0.619477	0.00792505	Significant	1.00193	9.12334e-09	Up-regulated
YGR034W	RPL26B	Ribosomal 60S subunit protein L26B	-0.387056	0.118761	Not-significant	1.00148	1.50368e-10	Up-regulated
YHR143W-A	RPC10	RNA polymerase subunit ABC10-alpha, found in RNA pol I, II, and III	-0.0868911	0.862643	Not-significant	1.00002	1.08358e-11	Up-regulated
YBR187W	GDT1	Protein of unknown function involved in calcium homeostasis	-0.196621	0.492212	Not-significant	0.999494	2.17729e-13	Significant
YJR132W	NMD5	Karyopherin	-0.179442	0.384335	Not-significant	0.999445	1.89501e-12	Significant
YBR084C-A	RPL19A	Ribosomal 60S subunit protein L19A	-0.249599	0.434557	Not-significant	0.99818	3.5153e-08	Significant
YFR031C-A	RPL2A	Ribosomal 60S subunit protein L2A	-0.342534	0.274632	Not-significant	0.996903	5.08636e-07	Significant
YFL050C	ALR2	Probable Mg(2+) transporter	0.108024	0.763229	Not-significant	0.996843	8.26016e-14	Significant
YGR285C	ZUO1	Ribosome-associated chaperone	-0.238333	0.485931	Not-significant	0.996794	1.36462e-08	Significant
YDR397C	NCB2	Subunit of a heterodimeric NC2 transcription regulator complex	-0.201273	0.682988	Not-significant	0.99572	9.65761e-07	Significant
YML016C	PPZ1	Serine/threonine protein phosphatase Z, isoform of Ppz2p	0.102438	0.682988	Not-significant	0.993506	1.35658e-30	Significant
YKL172W	EBP2	Required for 25S rRNA maturation and 60S ribosomal subunit assembly	-0.103763	0.769189	Not-significant	0.992671	5.94114e-13	Significant
YOR182C	RPS30B	Protein component of the small (40S) ribosomal subunit	-0.295186	0.286692	Not-significant	0.992646	3.48446e-10	Significant
YNL054W-B	YNL054W-B	TyB Gag-Pol protein	-0.781331	0.000176902	Significant	0.991053	3.10384e-06	Significant
YNL067W	RPL9B	Ribosomal 60S subunit protein L9B	-0.166171	0.562815	Not-significant	0.990896	2.33565e-12	Significant
YOL140W	ARG8	Acetylornithine aminotransferase	-0.257896	0.0370775	Significant	0.988968	1.1221e-14	Significant
YLR107W	REX3	RNA exonuclease	0.246811	0.337691	Not-significant	0.987127	2.02117e-14	Significant
YNL254C	RTC4	Protein of unknown function	0.122089	0.626339	Not-significant	0.986126	2.16594e-16	Significant
YBL076C	ILS1	Cytoplasmic isoleucine-tRNA synthetase	-0.216802	0.0788068	Not-significant	0.984474	7.24396e-21	Significant
YBL014C	RRN6	Component of the core factor (CF) rDNA transcription factor complex	-0.20333	0.481873	Not-significant	0.984281	2.92869e-12	Significant
YKR094C	RPL40B	Ubiquitin-ribosomal 60S subunit protein L40B fusion protein	-0.277083	0.313462	Not-significant	0.983804	1.65142e-09	Significant
YIR011C	STS1	Protein required for localizing proteasomes to the nucleus	0.0143557	0.971334	Not-significant	0.980968	5.072e-19	Significant
YDR198C	RKM2	Ribosomal protein lysine methyltransferase	-0.010541	0.982735	Not-significant	0.980165	2.84387e-11	Significant
YGR208W	SER2	Phosphoserine phosphatase of the phosphoglycerate pathway	-0.13325	0.810091	Not-significant	0.978549	1.82305e-06	Significant
YPL137C	GIP3	Cytoplasmic protein that regulates protein phosphatase 1 Glc7p	0.117123	0.626339	Not-significant	0.978113	2.59728e-16	Significant
YGL194C-A	YGL194C-A	Putative protein of unknown function	-0.279308	0.730666	Not-significant	0.976807	0.00184541	Significant
YGL026C	TRP5	Tryptophan synthase	-0.087855	0.81809	Not-significant	0.973729	5.54303e-09	Significant
YOR312C	RPL20B	Ribosomal 60S subunit protein L20B	-0.18625	0.445197	Not-significant	0.973508	2.15235e-14	Significant
YNL302C	RPS19B	Protein component of the small (40S) ribosomal subunit	-0.308956	0.332568	Not-significant	0.972644	4.9427e-08	Significant
YHR141C	RPL42B	Ribosomal 60S subunit protein L42B	-0.416774	0.151831	Not-significant	0.971025	8.97429e-08	Significant
YHR089C	GAR1	Protein component of the H/ACA snoRNP pseudouridylase complex	-0.223995	0.428553	Not-significant	0.969598	1.90282e-10	Significant
YPL057C	SUR1	Mannosylinositol phosphorylceramide (MIPC) synthase catalytic subunit	-0.0394581	0.925341	Not-significant	0.968035	2.93927e-21	Significant
YLR419W	YLR419W	Putative helicase with limited sequence similarity to human Rb protein	-0.0663564	0.86839	Not-significant	0.967321	1.44204e-11	Significant
YDR450W	RPS18A	Protein component of the small (40S) ribosomal subunit	-0.368037	0.148814	Not-significant	0.967111	1.50736e-08	Significant
YOL086C	ADH1	Alcohol dehydrogenase	-0.00300096	0.997024	Not-significant	0.966756	2.30639e-08	Significant
YFL014W	HSP12	Plasma membrane protein involved in maintaining membrane organization	0.71905	0.00346961	Significant	0.966333	6.66285e-05	Significant
YLR040C	YLR040C	MATalpha-specific a-factor blocker	0.280869	0.518973	Not-significant	0.965086	0.000340287	Significant
YKR041W	YKR041W	Protein of unknown function	0.103222	0.862643	Not-significant	0.965019	2.29563e-05	Significant
YGL029W	CGR1	Protein involved in nucleolar integrity and processing of pre-rRNA	-0.266449	0.540883	Not-significant	0.964306	8.69235e-07	Significant
YDR385W	EFT2	Elongation factor 2 (EF-2), also encoded by EFT1	-0.103371	0.750432	Not-significant	0.964163	4.38355e-14	Significant
YPL179W	PPQ1	Protein phosphatase that regulates the mating response	0.00376846	0.996845	Not-significant	0.963859	5.85657e-10	Significant
YEL036C	ANP1	Subunit of the alpha-1,6 mannosyltransferase complex	-0.140226	0.622117	Not-significant	0.962848	7.19563e-14	Significant
YJL011C	RPC17	RNA polymerase III subunit C17	-0.347016	0.123658	Not-significant	0.961586	1.35375e-08	Significant
YGR118W	RPS23A	Ribosomal protein 28 (rp28) of the small (40S) ribosomal subunit	-0.351096	0.199759	Not-significant	0.961361	9.16511e-09	Significant
YML024W	RPS17A	Ribosomal protein 51 (rp51) of the small (40s) subunit	-0.36327	0.098458	Not-significant	0.960594	1.89297e-10	Significant
YNL277W	MET2	L-homoserine-O-acetyltransferase	0.616945	0.181519	Not-significant	0.959619	0.0011483	Significant
YPL082C	MOT1	Essential protein involved in regulation of transcription	-0.113292	0.756158	Not-significant	0.955949	1.89495e-11	Significant
YKL156W	RPS27A	Protein component of the small (40S) ribosomal subunit	-0.196271	0.490171	Not-significant	0.955861	2.45376e-13	Significant
YBR257W	POP4	Subunit of both RNase MRP and nuclear RNase P	0.0459227	0.938602	Not-significant	0.952461	7.83937e-11	Significant
YKR015C	YKR015C	Putative protein of unknown function	-2.15976	6.42743e-08	Down-regulated	0.951984	0.0132789	Significant
YDR453C	TSA2	Stress inducible cytoplasmic thioredoxin peroxidase	0.291953	0.706624	Not-significant	0.951783	0.000771869	Significant
YHL029C	OCA5	Cytoplasmic protein required for replication of Brome mosaic virus	-0.0307554	0.922255	Not-significant	0.951681	5.55778e-21	Significant
YER049W	TPA1	Fe(II)/2-oxoglutarate-dependent dioxygenase family member	-0.0519464	0.862643	Not-significant	0.950407	2.53202e-18	Significant
YPL221W	FLC1	Putative FAD transporter	-0.00506955	0.991489	Not-significant	0.949682	1.90233e-17	Significant
YBR143C	SUP45	Polypeptide release factor (eRF1) in translation termination	-0.175014	0.425436	Not-significant	0.949025	1.46006e-12	Significant
YGL189C	RPS26A	Protein component of the small (40S) ribosomal subunit	-0.265352	0.423489	Not-significant	0.948349	7.19803e-08	Significant
YML023C	NSE5	Component of the SMC5-SMC6 complex	-0.236848	0.20565	Not-significant	0.947966	8.37804e-10	Significant
YGR087C	PDC6	Minor isoform of pyruvate decarboxylase	0.405599	0.542516	Not-significant	0.947308	0.0207441	Significant
YNL220W	ADE12	Adenylosuccinate synthase	0.0544439	0.946036	Not-significant	0.947218	1.24939e-07	Significant
YGR175C	ERG1	Squalene epoxidase	0.026069	0.96109	Not-significant	0.946916	1.02033e-10	Significant
YKL054C	DEF1	RNAPII degradation factor	0.10399	0.638229	Not-significant	0.946812	5.72103e-17	Significant
YOR260W	GCD1	Gamma subunit of the translation initiation factor eIF2B	-0.0340332	0.893979	Not-significant	0.945791	6.48175e-23	Significant
YOR370C	MRS6	Rab escort protein	-0.0160216	0.961157	Not-significant	0.94524	1.66832e-24	Significant
YLR167W	RPS31	Fusion protein cleaved to yield ribosomal protein S31 and ubiquitin	-0.367066	0.19725	Not-significant	0.944703	4.50556e-08	Significant
YCR031C	RPS14A	Protein component of the small (40S) ribosomal subunit	-0.304162	0.295318	Not-significant	0.944295	2.22986e-08	Significant
YDR161W	YDR161W	Putative protein of unknown function	-0.17288	0.492111	Not-significant	0.944063	1.23008e-13	Significant
YJR123W	RPS5	Protein component of the small (40S) ribosomal subunit	-0.276065	0.380101	Not-significant	0.943483	9.47694e-08	Significant
YOR119C	RIO1	Serine kinase involved in cell cycling and pre-rRNA processing	0.0317414	0.940564	Not-significant	0.94247	9.46953e-14	Significant
YAR015W	ADE1	N-succinyl-5-aminoimidazole-4-carboxamide ribotide synthetase	0.085068	0.902635	Not-significant	0.940976	1.24529e-05	Significant
YKR057W	RPS21A	Protein component of the small (40S) ribosomal subunit	-0.457178	0.0688314	Not-significant	0.940762	3.25483e-08	Significant
YIL056W	VHR1	Transcriptional activator	0.158727	0.664853	Not-significant	0.940263	1.76301e-09	Significant
YDR043C	NRG1	Transcriptional repressor	0.0701099	0.930087	Not-significant	0.940229	6.83128e-06	Significant
YLR287C	YLR287C	Putative protein of unknown function	-0.0260737	0.966543	Not-significant	0.939995	1.97393e-06	Significant
YMR306W	FKS3	Protein involved in spore wall assembly	0.0995486	0.879285	Not-significant	0.93731	0.000106213	Significant
YDR312W	SSF2	Protein required for ribosomal large subunit maturation	-0.00218555	0.997024	Not-significant	0.93644	6.62669e-11	Significant
YMR142C	RPL13B	Ribosomal 60S subunit protein L13B	-0.347716	0.211467	Not-significant	0.936079	2.1924e-07	Significant
YLR340W	RPP0	Conserved ribosomal protein P0 of the ribosomal stalk	-0.195443	0.370614	Not-significant	0.935643	7.43103e-13	Significant
YDL112W	TRM3	2'-O-ribose methyltransferase	-0.193421	0.472833	Not-significant	0.935634	5.71799e-09	Significant
YKL096W	CWP1	Cell wall mannoprotein that localizes to birth scars of daughter cells	0.204661	0.521339	Not-significant	0.935533	1.33997e-06	Significant
YAL029C	MYO4	Type V myosin motor involved in actin-based transport of cargos	-0.0296635	0.962111	Not-significant	0.934934	1.57146e-08	Significant
YGR054W	YGR054W	Eukaryotic initiation factor (eIF) 2A	0.0497995	0.882796	Not-significant	0.934089	1.99603e-24	Significant
YGR214W	RPS0A	Ribosomal 40S subunit protein S0A	-0.319595	0.205185	Not-significant	0.932505	4.93689e-09	Significant
YML014W	TRM9	tRNA methyltransferase	-0.243845	0.325357	Not-significant	0.930624	4.94711e-08	Significant
YBL027W	RPL19B	Ribosomal 60S subunit protein L19B	-0.306986	0.317549	Not-significant	0.930609	4.62436e-07	Significant
YPR186C	PZF1	Transcription factor IIIA (TFIIIA)	0.0757188	0.833677	Not-significant	0.9284	2.152e-11	Significant
YIL159W	BNR1	Formin	0.10898	0.822764	Not-significant	0.926978	1.42031e-06	Significant
YPR169W	JIP5	Protein required for biogenesis of the large ribosomal subunit	-0.111772	0.649728	Not-significant	0.926695	4.32417e-19	Significant
YMR116C	ASC1	G-protein beta subunit and guanine dissociation inhibitor for Gpa2p	-0.0673516	0.922255	Not-significant	0.926486	2.45977e-06	Significant
YOR224C	RPB8	RNA polymerase subunit ABC14.5	-0.204169	0.688825	Not-significant	0.925988	1.33417e-05	Significant
YDR157W	YDR157W	Dubious open reading frame	0.160774	0.813314	Not-significant	0.925695	0.000708318	Significant
YHR064C	SSZ1	Hsp70 protein that interacts with Zuo1p (a DnaJ homolog)	-0.15965	0.650192	Not-significant	0.922627	1.81738e-09	Significant
YKL099C	UTP11	Subunit of U3-containing Small Subunit (SSU) processome complex	-0.0655587	0.884362	Not-significant	0.922272	7.9619e-13	Significant
YMR013C	SEC59	Dolichol kinase	-0.204546	0.718349	Not-significant	0.921661	0.00127772	Significant
YOR210W	RPB10	RNA polymerase subunit ABC10-beta	-0.153025	0.587066	Not-significant	0.92025	3.11959e-12	Significant
YPR048W	TAH18	Conserved NAPDH-dependent diflavin reductase	-0.0639133	0.862643	Not-significant	0.919908	2.984e-12	Significant
YLR343W	GAS2	1,3-beta-glucanosyltransferase	-0.00468029	0.995942	Not-significant	0.918474	8.08959e-06	Significant
SRG1	SRG1	Non-protein-coding RNA that regulates the transcription of SER3	0.0212163	0.984176	Not-significant	0.917997	0.00174861	Significant
YMR185W	YMR185W	Protein required for the nuclear import and biogenesis of RNA pol II	-0.0889908	0.900351	Not-significant	0.917959	3.34089e-05	Significant
YLR363W-A	YLR363W-A	Protein of unknown function	-0.18895	0.732326	Not-significant	0.917134	3.15928e-08	Significant
YMR296C	LCB1	Component of serine palmitoyltransferase	0.0270199	0.961137	Not-significant	0.917012	8.84805e-10	Significant
YPR041W	TIF5	Translation initiation factor eIF5	-0.0807522	0.747355	Not-significant	0.916686	5.82628e-21	Significant
YKL144C	RPC25	RNA polymerase III subunit C25	-0.267152	0.1609	Not-significant	0.916642	7.41395e-12	Significant
YLR384C	IKI3	Subunit of Elongator complex	-0.160125	0.572533	Not-significant	0.915753	1.17317e-11	Significant
YDR127W	ARO1	Pentafunctional arom protein	-0.362632	0.004942	Significant	0.91553	3.0158e-22	Significant
YMR175W-A	YMR175W-A	Putative protein of unknown function	0.513998	0.600524	Not-significant	0.913747	0.0369149	Significant
YGR152C	RSR1	GTP-binding protein of the Ras superfamily	-0.0597192	0.943125	Not-significant	0.912484	6.23407e-06	Significant
YPR125W	YLH47	Mitochondrial inner membrane protein	-0.0878533	0.811265	Not-significant	0.911411	1.57762e-17	Significant
YBR158W	AMN1	Protein required for daughter cell separation	-0.0853682	0.796217	Not-significant	0.910876	1.18432e-14	Significant
YBL061C	SKT5	Activator of Chs3p (chitin synthase III) during vegetative growth	-0.0272967	0.948306	Not-significant	0.909816	1.46635e-14	Significant
YPR074C	TKL1	Transketolase	-0.11185	0.707228	Not-significant	0.909384	1.03464e-11	Significant
YMR241W	YHM2	Citrate and oxoglutarate carrier protein	-1.24683	9.52411e-34	Down-regulated	0.909349	1.25348e-14	Significant
YDL130W	RPP1B	Ribosomal protein P1 beta	-0.254234	0.488243	Not-significant	0.907063	2.16386e-06	Significant
YOR032C	HMS1	bHLH protein with similarity to myc-family transcription factors	0.35142	0.328327	Not-significant	0.906342	0.00040241	Significant
YGL194C	HOS2	Histone deacetylase and subunit of Set3 and Rpd3L complexes	-0.357842	0.489294	Not-significant	0.903145	0.00183688	Significant
YPR069C	SPE3	Spermidine synthase	-0.209469	0.567327	Not-significant	0.903129	2.17968e-06	Significant
YLR243W	YLR243W	Putative GTPase with a role in biogenesis of RNA pol II and polIII	0.109192	0.774519	Not-significant	0.902582	3.72766e-09	Significant
YCR018C	SRD1	Protein involved in the processing of pre-rRNA to mature rRNA	-0.308206	0.542431	Not-significant	0.902278	2.67232e-05	Significant
YOR001W	RRP6	Nuclear exosome exonuclease component	-0.0537423	0.847406	Not-significant	0.900985	7.07548e-24	Significant
YBR023C	CHS3	Chitin synthase III	0.0285615	0.961157	Not-significant	0.900159	8.49854e-08	Significant
YPL103C	FMP30	Protein with a role in maintaining mitochondrial morphology	-0.0943323	0.852909	Not-significant	0.899468	1.24851e-07	Significant
YBR242W	YBR242W	Putative protein of unknown function	-0.00262414	0.997024	Not-significant	0.899208	7.86175e-10	Significant
YMR316W	DIA1	Protein of unknown function	0.19677	0.540883	Not-significant	0.89908	3.26713e-06	Significant
YAL039C	CYC3	Cytochrome c heme lyase (holocytochrome c synthase)	0.481116	0.0910985	Not-significant	0.897437	1.45804e-05	Significant
YOL061W	PRS5	5-phospho-ribosyl-1(alpha)-pyrophosphate synthetase	-0.0967716	0.761404	Not-significant	0.89493	7.35785e-13	Significant
YNL232W	CSL4	Exosome non-catalytic core component	-0.0285032	0.955097	Not-significant	0.893422	3.4639e-08	Significant
YHR062C	RPP1	Subunit of both RNase MRP and nuclear RNase P	-0.0618955	0.933949	Not-significant	0.891207	9.2079e-06	Significant
YKL055C	OAR1	Mitochondrial 3-oxoacyl-[acyl-carrier-protein] reductase	-0.155098	0.877444	Not-significant	0.891157	0.00800274	Significant
YGR036C	CAX4	Dolichyl pyrophosphate (Dol-P-P) phosphatase	-0.0394158	0.957671	Not-significant	0.890667	9.54991e-09	Significant
YDR500C	RPL37B	Ribosomal 60S subunit protein L37B	-0.33601	0.239187	Not-significant	0.890183	2.71232e-07	Significant
YDR214W	AHA1	Co-chaperone that binds Hsp82p and activates its ATPase activity	0.560504	0.00638657	Significant	0.889273	6.78169e-08	Significant
YML091C	RPM2	Protein subunit of mitochondrial RNase P	-2.19236	1.66188e-18	Down-regulated	0.8874	0.000781728	Significant
YMR269W	TMA23	Nucleolar protein implicated in ribosome biogenesis	-0.261274	0.598359	Not-significant	0.887324	0.000499641	Significant
YJL058C	BIT61	Subunit of TORC2 membrane-associated complex	-0.220769	0.646069	Not-significant	0.885529	5.05543e-06	Significant
YPR143W	RRP15	Nucleolar protein	-0.240661	0.372184	Not-significant	0.883972	3.70964e-09	Significant
YDR002W	YRB1	Ran GTPase binding protein	-0.0428845	0.94981	Not-significant	0.883228	5.07899e-07	Significant
YLR060W	FRS1	Beta subunit of cytoplasmic phenylalanyl-tRNA synthetase	-0.0925423	0.680308	Not-significant	0.882897	3.30619e-17	Significant
YKL024C	URA6	Uridylate kinase	-0.19227	0.673424	Not-significant	0.882706	2.03101e-05	Significant
YPR132W	RPS23B	Ribosomal protein 28 (rp28) of the small (40S) ribosomal subunit	-0.380996	0.176217	Not-significant	0.88134	2.06806e-06	Significant
YOR071C	NRT1	High-affinity nicotinamide riboside transporter	-0.651684	9.10457e-06	Significant	0.879776	1.16702e-11	Significant
YGR083C	GCD2	Delta subunit of the translation initiation factor eIF2B	-0.0437641	0.863297	Not-significant	0.878331	3.29618e-21	Significant
YKL125W	RRN3	Protein required for transcription of rDNA by RNA polymerase I	0.112413	0.737791	Not-significant	0.878275	6.35646e-14	Significant
YJR003C	YJR003C	Protein that associates with mitochondrial ribosome	-0.182049	0.774519	Not-significant	0.877818	0.00151495	Significant
YPL106C	SSE1	ATPase component of heat shock protein Hsp90 chaperone complex	0.107606	0.774519	Not-significant	0.877514	2.17219e-08	Significant
YNR018W	AIM38	Cytochrome c oxidase subunit	-0.484779	0.0833502	Not-significant	0.875081	3.36607e-06	Significant
YHL039W	EFM1	Lysine methyltransferase	-0.243273	0.340316	Not-significant	0.873057	4.32817e-07	Significant
YPR009W	SUT2	Putative transcription factor of the Zn2Cys6 family	0.0367709	0.960651	Not-significant	0.872839	5.90941e-07	Significant
YLR278C	YLR278C	Zinc-cluster protein	0.064643	0.868229	Not-significant	0.872814	4.67421e-13	Significant
YNL209W	SSB2	Cytoplasmic ATPase that is a ribosome-associated molecular chaperone	-0.176584	0.551666	Not-significant	0.871549	1.01987e-10	Significant
YPL239W	YAR1	Ankyrin-repeat containing, nucleocytoplasmic shuttling chaperone	-0.222666	0.507354	Not-significant	0.86979	1.75868e-06	Significant
YBR002C	RER2	Cis-prenyltransferase involved in dolichol synthesis	-0.104779	0.843316	Not-significant	0.869504	7.76581e-06	Significant
YOL097C	WRS1	Cytoplasmic tryptophanyl-tRNA synthetase	-0.125588	0.675315	Not-significant	0.868395	2.35471e-12	Significant
YKL033W	TTI1	Subunit of the ASTRA complex, involved in chromatin remodeling	-0.0857222	0.868341	Not-significant	0.866683	1.93444e-06	Significant
YJL025W	RRN7	Component of the core factor (CF) rDNA transcription factor complex	0.0168734	0.971334	Not-significant	0.864906	7.29393e-12	Significant
YPL092W	SSU1	Plasma membrane sulfite pump involved in sulfite metabolism	-0.0999179	0.767818	Not-significant	0.864856	3.10151e-07	Significant
YER037W	PHM8	Lysophosphatidic acid (LPA) phosphatase, nucleotidase	0.2727	0.560858	Not-significant	0.864642	7.4472e-05	Significant
YOL022C	TSR4	Cytoplasmic protein required for correct processing of 20S pre-rRNA	0.0110446	0.977414	Not-significant	0.863116	8.1261e-11	Significant
YGR094W	VAS1	Mitochondrial and cytoplasmic valyl-tRNA synthetase	-0.175698	0.295561	Not-significant	0.863005	1.18195e-17	Significant
YLR130C	ZRT2	Low-affinity zinc transporter of the plasma membrane	-0.0599103	0.807031	Not-significant	0.861392	7.10938e-15	Significant
YKL021C	MAK11	Protein involved in an early step of 60S ribosomal subunit biogenesis	-0.143919	0.61794	Not-significant	0.860634	4.3202e-15	Significant
YOR167C	RPS28A	Protein component of the small (40S) ribosomal subunit	-0.438484	0.187882	Not-significant	0.857376	3.4485e-05	Significant
YHR007C-A	YHR007C-A	Putative protein of unknown function	-0.872794	0.130118	Not-significant	0.856929	0.0371557	Significant
YCR054C	CTR86	Essential protein of unknown function	-0.0336211	0.964478	Not-significant	0.856152	4.84369e-06	Significant
YGL008C	PMA1	Plasma membrane P2-type H+-ATPase	-0.273426	0.178207	Not-significant	0.855402	6.49772e-10	Significant
YDR478W	SNM1	Ribonuclease MRP complex subunit	-0.0769356	0.914721	Not-significant	0.854701	0.000223317	Significant
YGL056C	SDS23	Protein involved in cell separation during budding	-0.0969201	0.759194	Not-significant	0.854294	5.53713e-11	Significant
YPR060C	ARO7	Chorismate mutase	-0.12079	0.730812	Not-significant	0.853908	1.40608e-06	Significant
YBR004C	GPI18	Functional ortholog of human PIG-V	-0.0648001	0.953866	Not-significant	0.852676	0.0188271	Significant
YML099C	ARG81	Zinc finger transcription factor involved in arginine-responsive genes	-0.0963637	0.770444	Not-significant	0.852354	8.0851e-09	Significant
YML082W	YML082W	Putative protein predicted to have carbon-sulfur lyase activity	0.158967	0.567327	Not-significant	0.85144	3.95367e-10	Significant
YKL178C	STE3	Receptor for a factor pheromone	0.13255	0.863626	Not-significant	0.847855	0.00168713	Significant
YOR006C	TSR3	Protein required for 20S pre-rRNA processing	-0.0254809	0.971334	Not-significant	0.846969	2.09205e-06	Significant
YDL136W	RPL35B	Ribosomal 60S subunit protein L35B	-0.275512	0.253051	Not-significant	0.84661	1.4824e-14	Significant
YPL032C	SVL3	Protein of unknown function	-0.254394	0.383917	Not-significant	0.844906	1.42408e-08	Significant
YPL207W	TYW1	Iron-sulfer protein required for synthesis of Wybutosine modified tRNA	-0.425362	0.000879139	Significant	0.844559	5.89394e-17	Significant
YKL068W	NUP100	FG-nucleoporin component of central core of the nuclear pore complex	0.0230028	0.946722	Not-significant	0.844486	1.51566e-16	Significant
YGR198W	YPP1	Cargo-transport protein involved in endocytosis	-0.182014	0.680308	Not-significant	0.843602	2.11669e-07	Significant
YGL204C	YGL204C	Protein of unknown function	-0.164556	0.841496	Not-significant	0.843494	0.00520423	Significant
YPR085C	ASA1	Subunit of the ASTRA complex, involved in chromatin remodeling	-0.0877496	0.822764	Not-significant	0.841825	9.22991e-10	Significant
YGR251W	NOP19	Ribosome biogenesis factor	-0.204249	0.572431	Not-significant	0.841399	3.49837e-07	Significant
YGL246C	RAI1	Nuclear protein with decapping endonuclease activity	-0.113693	0.712201	Not-significant	0.840854	2.33983e-11	Significant
YBR083W	TEC1	Transcription factor targeting filamentation genes and Ty1 expression	-0.169106	0.646069	Not-significant	0.840351	1.63354e-10	Significant
YML006C	GIS4	CAAX box containing protein of unknown function	-0.0929854	0.868229	Not-significant	0.84035	7.39122e-06	Significant
YDR035W	ARO3	3-deoxy-D-arabino-heptulosonate-7-phosphate (DAHP) synthase	-0.134609	0.688522	Not-significant	0.839407	3.72939e-08	Significant
YLR106C	MDN1	Huge dynein-related AAA-type ATPase (midasin)	-0.106067	0.811973	Not-significant	0.834908	1.05559e-09	Significant
YKL106W	AAT1	Mitochondrial aspartate aminotransferase	-0.0900954	0.750432	Not-significant	0.834842	2.06395e-10	Significant
YDR441C	APT2	Potential adenine phosphoribosyltransferase	0.00672597	0.991489	Not-significant	0.834702	3.53948e-06	Significant
YER165W	PAB1	Poly(A) binding protein	-0.0799701	0.833677	Not-significant	0.834196	1.289e-09	Significant
YIL064W	SEE1	Lysine methyltransferase	-0.453844	0.0264756	Significant	0.833335	1.0551e-06	Significant
YGR001C	YGR001C	S-adenosylmethionine-dependent lysine methyltransferase	-0.25487	0.334365	Not-significant	0.83308	4.74507e-07	Significant
YER007W	PAC2	Microtubule effector required for tubulin heterodimer formation	0.0373041	0.967707	Not-significant	0.830991	0.000923161	Significant
YOR205C	GEP3	Protein required for mitochondrial ribosome small subunit biogenesis	-0.0202028	0.959733	Not-significant	0.830492	3.5868e-13	Significant
YIL092W	YIL092W	Putative protein of unknown function	0.147636	0.688522	Not-significant	0.830342	2.74573e-07	Significant
YHR144C	DCD1	Deoxycytidine monophosphate (dCMP) deaminase	-0.195059	0.474588	Not-significant	0.827948	2.04848e-07	Significant
YHL007C	STE20	Cdc42p-activated signal transducing kinase	-0.0115234	0.971334	Not-significant	0.827842	9.67406e-21	Significant
YPR163C	TIF3	Translation initiation factor eIF-4B	-0.188255	0.559592	Not-significant	0.827544	4.53882e-08	Significant
YLR355C	ILV5	Acetohydroxyacid reductoisomerase and mtDNA binding protein	0.136257	0.568194	Not-significant	0.827462	1.16815e-09	Significant
YKL018W	SWD2	Subunit of the COMPASS (Set1C) histone H3K4 methyltransferase complex	-0.115248	0.731904	Not-significant	0.827416	6.09528e-11	Significant
YGL144C	ROG1	Lipase with specificity for monoacylglycerol	-0.0533071	0.86839	Not-significant	0.825651	1.75461e-12	Significant
YGR057C	LST7	Protein possibly involved in a post-Golgi secretory pathway	-0.323686	0.564713	Not-significant	0.824898	0.0057356	Significant
YDL117W	CYK3	SH3-domain protein located in the bud neck and cytokinetic actin ring	0.133172	0.570314	Not-significant	0.824279	5.81818e-14	Significant
YDL081C	RPP1A	Ribosomal stalk protein P1 alpha	-0.243225	0.32384	Not-significant	0.822354	9.35835e-08	Significant
YGR078C	PAC10	Part of the heteromeric co-chaperone GimC/prefoldin complex	-0.0216097	0.974064	Not-significant	0.820709	2.28069e-05	Significant
YHR077C	NMD2	Protein involved in the nonsense-mediated mRNA decay (NMD) pathway	-0.162838	0.611012	Not-significant	0.820529	7.40232e-08	Significant
YDR019C	GCV1	T subunit of the mitochondrial glycine decarboxylase complex	0.0899991	0.899432	Not-significant	0.820409	0.000965183	Significant
YDR380W	ARO10	Phenylpyruvate decarboxylase	-1.06352	2.88927e-11	Down-regulated	0.819701	6.03242e-07	Significant
YDR072C	IPT1	Inositolphosphotransferase	-3.4102e-05	0.999912	Not-significant	0.81819	1.30524e-10	Significant
YDR186C	YDR186C	Putative protein of unknown function	0.119107	0.629297	Not-significant	0.817419	3.9828e-19	Significant
YDR321W	ASP1	Cytosolic L-asparaginase, involved in asparagine catabolism	-0.229826	0.309172	Not-significant	0.815795	3.38151e-11	Significant
YGR258C	RAD2	Single-stranded DNA endonuclease	0.192638	0.319528	Not-significant	0.814651	4.58197e-09	Significant
YPL143W	RPL33A	Ribosomal 60S subunit protein L33A	-0.283111	0.342105	Not-significant	0.814118	2.24425e-06	Significant
YNL261W	ORC5	Subunit of the origin recognition complex (ORC)	0.281814	0.248722	Not-significant	0.813526	1.69753e-08	Significant
YNL164C	IBD2	Component of the BUB2-dependent spindle checkpoint pathway	-0.153762	0.561641	Not-significant	0.810263	1.51213e-08	Significant
YGL178W	MPT5	mRNA-binding protein of the PUF family	0.196048	0.758234	Not-significant	0.810147	0.00319785	Significant
YDR366C	YDR366C	Putative protein of unknown function	-0.104914	0.769137	Not-significant	0.809839	8.18524e-09	Significant
YCL030C	HIS4	Multifunctional enzyme containing phosphoribosyl-ATP pyrophosphatase	-0.0272269	0.968898	Not-significant	0.809094	1.58669e-07	Significant
YFR001W	LOC1	Nuclear protein involved in asymmetric localization of ASH1 mRNA	-0.164109	0.56931	Not-significant	0.808845	7.07518e-08	Significant
YLR224W	YLR224W	F-box protein and component of SCF ubiquitin ligase complexes	-0.0529943	0.864194	Not-significant	0.803651	8.50121e-13	Significant
YMR042W	ARG80	Transcription factor involved in regulating arginine-responsive genes	0.0362127	0.959197	Not-significant	0.803279	3.01527e-06	Significant
YOR101W	RAS1	GTPase involved in G-protein signaling in adenylate cyclase activation	-0.0249257	0.97021	Not-significant	0.80208	5.23058e-06	Significant
YDR341C	YDR341C	Arginyl-tRNA synthetase	-0.118573	0.646069	Not-significant	0.800693	7.8827e-13	Significant
YOR390W	YOR390W	Protein involved in fluoride export	-0.546354	0.104191	Not-significant	0.799772	0.000540493	Significant
YDR364C	CDC40	Pre-mRNA splicing factor	-0.0731953	0.844594	Not-significant	0.799631	4.83687e-10	Significant
YIL150C	MCM10	Essential chromatin-associated protein	0.016058	0.978558	Not-significant	0.799254	2.21832e-07	Significant
YNR026C	SEC12	Guanine nucleotide exchange factor (GEF)	0.0499895	0.890089	Not-significant	0.799132	1.14556e-10	Significant
YKR082W	NUP133	Subunit of Nup84p subcomplex of nuclear pore complex (NPC)	-0.0627844	0.925341	Not-significant	0.79856	6.0428e-05	Significant
YGR185C	TYS1	Cytoplasmic tyrosyl-tRNA synthetase	-0.195972	0.497327	Not-significant	0.798129	1.84448e-08	Significant
YER038C	KRE29	Subunit of the SMC5-SMC6 complex	0.0405562	0.950778	Not-significant	0.797368	0.000657215	Significant
YCR053W	THR4	Threonine synthase	-0.0961182	0.76806	Not-significant	0.796248	1.70657e-11	Significant
YLR441C	RPS1A	Ribosomal protein 10 (rp10) of the small (40S) subunit	-0.251586	0.34596	Not-significant	0.794852	1.89026e-08	Significant
YGR003W	CUL3	Ubiquitin-protein ligase	-0.0880162	0.881722	Not-significant	0.794831	3.85429e-05	Significant
YDL033C	SLM3	tRNA-specific 2-thiouridylase	0.235209	0.586511	Not-significant	0.794616	0.00157449	Significant
YLR022C	SDO1	Guanine nucleotide exchange factor (GEF) for Ria1p	-0.0460523	0.9506	Not-significant	0.79237	1.90338e-05	Significant
YDR257C	RKM4	Ribosomal lysine methyltransferase	0.0417966	0.932485	Not-significant	0.790582	5.28642e-08	Significant
YDL061C	RPS29B	Protein component of the small (40S) ribosomal subunit	-0.391838	0.124468	Not-significant	0.790432	1.37756e-05	Significant
YBR136W	MEC1	Genome integrity checkpoint protein and PI kinase superfamily member	-0.102604	0.863626	Not-significant	0.790268	2.41613e-05	Significant
YLR413W	YLR413W	Putative protein of unknown function	0.00937503	0.993804	Not-significant	0.789079	0.00212566	Significant
YGL148W	ARO2	Bifunctional chorismate synthase and flavin reductase	-0.382202	0.0679655	Not-significant	0.788873	6.54986e-07	Significant
YDR489W	SLD5	Subunit of the GINS complex (Sld5p, Psf1p, Psf2p, Psf3p)	0.144315	0.747355	Not-significant	0.786878	3.79234e-05	Significant
YIL078W	THS1	Threonyl-tRNA synthetase	-0.158672	0.337735	Not-significant	0.786136	2.13321e-15	Significant
YJR054W	YJR054W	Potassium transporter that mediates K+ influx	-0.0085565	0.993433	Not-significant	0.785218	0.000201229	Significant
YBR068C	BAP2	High-affinity leucine permease	-0.258812	0.0582346	Not-significant	0.784171	5.2857e-11	Significant
YKR026C	GCN3	Alpha subunit of translation initiation factor eIF2B	-0.00612971	0.991279	Not-significant	0.782865	1.37061e-11	Significant
YDR158W	HOM2	Aspartic beta semi-aldehyde dehydrogenase	-0.388988	0.131286	Not-significant	0.781156	2.77486e-05	Significant
YGR153W	YGR153W	Putative protein of unknown function	0.525125	0.130118	Not-significant	0.781006	0.00969029	Significant
YPR138C	MEP3	Ammonium permease of high capacity and low affinity	-0.396537	0.286692	Not-significant	0.780762	4.18127e-05	Significant
YPR043W	RPL43A	Ribosomal 60S subunit protein L43A	-0.299296	0.362408	Not-significant	0.779612	3.35614e-05	Significant
YLR042C	YLR042C	Cell wall protein of unknown function	-0.112448	0.88962	Not-significant	0.778515	0.0088891	Significant
YHL026C	YHL026C	Putative protein of unknown function	0.0229768	0.964478	Not-significant	0.777894	4.33309e-09	Significant
YNL250W	RAD50	Subunit of MRX complex with Mre11p and Xrs2p	0.0160853	0.985985	Not-significant	0.777181	0.00314235	Significant
YDR006C	SOK1	Protein of unknown function	-0.0427016	0.938602	Not-significant	0.777152	7.74549e-08	Significant
YKR071C	DRE2	Component of the cytosolic Fe-S protein assembly (CIA) machinery	-0.192315	0.471791	Not-significant	0.776785	4.47321e-07	Significant
YOR350C	MNE1	Protein involved in splicing Group I aI5-beta intron from COX1 mRNA	0.0267956	0.971334	Not-significant	0.776779	0.000201913	Significant
YDR524C	AGE1	ADP-ribosylation factor (ARF) GTPase activating protein (GAP) effector	0.0107535	0.983139	Not-significant	0.775636	6.98858e-08	Significant
YPL220W	RPL1A	Ribosomal 60S subunit protein L1A	-0.359629	0.174938	Not-significant	0.774028	7.17629e-06	Significant
YOL002C	IZH2	Plasma membrane receptor for plant antifungal protein, osmotin	0.0406202	0.961157	Not-significant	0.772983	3.55083e-05	Significant
YOR334W	MRS2	Mitochondrial inner membrane Mg(2+) channel	0.0848658	0.86307	Not-significant	0.772252	0.000151922	Significant
YPL200W	CSM4	Protein required for accurate chromosome segregation during meiosis	-1.54444	3.6469e-09	Down-regulated	0.772238	0.00324308	Significant
YPL117C	IDI1	Isopentenyl diphosphate:dimethylallyl diphosphate isomerase	-0.00449781	0.991489	Not-significant	0.772092	3.39078e-11	Significant
YDR351W	SBE2	Protein required for bud growth	-0.0332981	0.94981	Not-significant	0.771955	4.12714e-09	Significant
YBR079C	RPG1	eIF3a subunit of the eukaryotic translation initiation factor 3 (eIF3)	-0.102611	0.564713	Not-significant	0.771732	1.41798e-16	Significant
YGR040W	KSS1	Mitogen-activated protein kinase (MAPK)	0.0245942	0.960539	Not-significant	0.771616	7.2733e-10	Significant
YDR023W	SES1	Cytosolic seryl-tRNA synthetase	-0.277189	0.0145723	Significant	0.771131	8.35053e-15	Significant
YLR143W	YLR143W	Diphthamide synthetase	0.0366209	0.939419	Not-significant	0.770304	2.25696e-08	Significant
YLR007W	NSE1	Component of the SMC5-SMC6 complex	0.130795	0.770954	Not-significant	0.767778	4.08376e-05	Significant
YBR104W	YMC2	Putative mitochondrial inner membrane transporter	-0.0914631	0.854993	Not-significant	0.767751	6.71572e-06	Significant
YLR116W	MSL5	Component of commitment complex	0.127007	0.644413	Not-significant	0.767661	8.65229e-09	Significant
YMR216C	SKY1	SR protein kinase (SRPK)	-0.177497	0.333971	Not-significant	0.766648	4.85841e-11	Significant
YLR316C	TAD3	Subunit of tRNA-specific adenosine-34 deaminase	-0.0937863	0.834749	Not-significant	0.764022	1.16825e-06	Significant
YOL021C	DIS3	Exosome core complex catalytic subunit	-0.0457041	0.921724	Not-significant	0.763963	1.49702e-09	Significant
YLL028W	TPO1	Polyamine transporter of the major facilitator superfamily	0.510379	0.00640635	Significant	0.763687	3.1449e-06	Significant
YIL145C	PAN6	Pantothenate synthase	-0.220361	0.49847	Not-significant	0.76252	7.54784e-06	Significant
YPR162C	ORC4	Subunit of the origin recognition complex (ORC)	-0.00664926	0.991489	Not-significant	0.761698	2.19401e-06	Significant
YBR118W	TEF2	Translational elongation factor EF-1 alpha	-0.0214837	0.971334	Not-significant	0.760905	5.02481e-06	Significant
YER144C	UBP5	Putative ubiquitin-specific protease	0.222406	0.150918	Not-significant	0.758895	8.95435e-14	Significant
YLR121C	YPS3	Aspartic protease	0.133077	0.774187	Not-significant	0.758206	1.36197e-05	Significant
YDR152W	GIR2	Highly-acidic RWD domain-containing protein of unknown function	-0.0991695	0.718349	Not-significant	0.757191	1.13513e-11	Significant
YLR221C	RSA3	Protein with a likely role in ribosomal maturation	-0.285344	0.234809	Not-significant	0.756082	1.08666e-07	Significant
YHR207C	SET5	Methyltransferase involved in methylation of histone H4 Lys5, -8, -12	-0.0853316	0.83546	Not-significant	0.755753	1.12041e-08	Significant
snR10	snR10	H/ACA box small nucleolar RNA (snoRNA)	-0.334398	0.460392	Not-significant	0.755567	0.00299847	Significant
YBR021W	FUR4	Plasma membrane localized uracil permease	0.0902429	0.885313	Not-significant	0.755491	1.84344e-05	Significant
YIL094C	LYS12	Homo-isocitrate dehydrogenase	-0.15045	0.801312	Not-significant	0.753947	0.00132234	Significant
YPR065W	ROX1	Heme-dependent repressor of hypoxic genes	-0.191139	0.605071	Not-significant	0.753584	8.45148e-08	Significant
YDR206W	EBS1	Protein involved in translation inhibition and nonsense-mediated decay	-0.227523	0.361269	Not-significant	0.753347	4.2779e-07	Significant
YBR261C	TAE1	AdoMet-dependent proline methyltransferase	-0.150138	0.780143	Not-significant	0.753019	0.000128354	Significant
YGL256W	ADH4	Alcohol dehydrogenase isoenzyme type IV	0.00270215	0.996845	Not-significant	0.752938	1.77561e-08	Significant
YDR514C	YDR514C	Protein of unknown function that localizes to mitochondria	-0.0920294	0.780143	Not-significant	0.752532	2.27346e-09	Significant
YJR072C	NPA3	Member of the conserved GPN-loop GTPase family	-0.042617	0.946371	Not-significant	0.752431	1.12997e-05	Significant
YNL050C	YNL050C	Putative protein of unknown function	-0.193722	0.352231	Not-significant	0.752331	6.43084e-09	Significant
YLR347C	KAP95	Karyopherin beta	0.032727	0.946265	Not-significant	0.752161	5.70244e-11	Significant
YDR339C	FCF1	Putative PINc domain nuclease	-0.140914	0.583221	Not-significant	0.75154	3.55669e-10	Significant
YHR124W	NDT80	Meiosis-specific transcription factor	-0.313107	0.559919	Not-significant	0.748744	0.00457244	Significant
YLL062C	MHT1	S-methylmethionine-homocysteine methyltransferase	0.301835	0.484392	Not-significant	0.748286	0.000232395	Significant
YJL160C	YJL160C	Putative protein of unknown function	0.0360482	0.971334	Not-significant	0.74783	0.0399759	Significant
YOR297C	TIM18	Component of the mitochondrial TIM22 complex	-0.100792	0.862952	Not-significant	0.747644	0.000239807	Significant
YGL036W	YGL036W	Putative protein of unknown function	0.231345	0.593754	Not-significant	0.747242	0.000277407	Significant
YMR243C	ZRC1	Vacuolar membrane zinc transporter	-0.182142	0.367076	Not-significant	0.747192	8.26977e-12	Significant
YMR192W	GYL1	Putative GTPase activating protein (GAP) with a role in exocytosis	0.131911	0.769137	Not-significant	0.746648	2.77312e-07	Significant
YKL201C	MNN4	Putative positive regulator of mannosylphosphate transferase Mnn6p	-0.268852	0.465894	Not-significant	0.745692	0.000386911	Significant
YBL100W-B	YBL100W-B	Retrotransposon TYA Gag and TYB Pol genes	0.0969139	0.900351	Not-significant	0.744838	0.00436063	Significant
YPL252C	YAH1	Ferredoxin of the mitochondrial matrix	-0.083613	0.865324	Not-significant	0.74473	1.615e-06	Significant
YML125C	PGA3	Putative cytochrome b5 reductase, localized to the plasma membrane	0.18757	0.626627	Not-significant	0.744504	2.07191e-05	Significant
YLR332W	MID2	O-glycosylated plasma membrane protein	-0.131467	0.638196	Not-significant	0.743405	3.34591e-11	Significant
YJL045W	YJL045W	Minor succinate dehydrogenase isozyme	1.10889	1.12513e-09	Up-regulated	0.742174	0.000762178	Significant
YDL131W	LYS21	Homocitrate synthase isozyme	-0.173294	0.485712	Not-significant	0.742101	1.12507e-06	Significant
YMR318C	ADH6	NADPH-dependent medium chain alcohol dehydrogenase	-0.030865	0.971334	Not-significant	0.741953	0.0030526	Significant
YDR172W	SUP35	Translation termination factor eRF3	-0.11765	0.561745	Not-significant	0.739747	5.01582e-14	Significant
YOR305W	RRG7	Protein of unknown function	-0.279369	0.31551	Not-significant	0.739452	1.6623e-06	Significant
YLR286C	CTS1	Endochitinase	0.565126	1.3757e-05	Significant	0.738986	3.10229e-06	Significant
YBL079W	NUP170	Subunit of the inner ring of the nuclear pore complex (NPC)	-0.145611	0.780688	Not-significant	0.738774	0.000521198	Significant
YBR115C	LYS2	Alpha aminoadipate reductase	-0.253603	0.109673	Not-significant	0.738655	5.37762e-13	Significant
YHR118C	ORC6	Subunit of the origin recognition complex (ORC)	-0.0543617	0.912015	Not-significant	0.736454	2.71521e-06	Significant
YIL110W	HPM1	AdoMet-dependent methyltransferase	-0.052479	0.898064	Not-significant	0.735296	1.28302e-10	Significant
YBR082C	UBC4	Ubiquitin-conjugating enzyme (E2)	0.18051	0.560479	Not-significant	0.734893	9.12307e-06	Significant
YOR222W	ODC2	Mitochondrial inner membrane transporter	-0.345866	0.212256	Not-significant	0.733995	0.000167456	Significant
YBR244W	GPX2	Phospholipid hydroperoxide glutathione peroxidase	-0.252565	0.66485	Not-significant	0.732475	0.0151475	Significant
YEL063C	CAN1	Plasma membrane arginine permease	0.0507688	0.93392	Not-significant	0.731367	1.61988e-07	Significant
YDR412W	RRP17	Component of the pre-60S pre-ribosomal particle	-0.232232	0.384335	Not-significant	0.730858	3.84014e-06	Significant
YKL090W	CUE2	Protein of unknown function	-0.158172	0.685486	Not-significant	0.730828	1.15712e-05	Significant
YDR448W	ADA2	Transcription coactivator	-0.20813	0.681899	Not-significant	0.728828	0.00322206	Significant
YHR072W-A	NOP10	Subunit of box H/ACA snoRNP complex	-0.387935	0.201789	Not-significant	0.727161	8.12801e-05	Significant
YGR027C	RPS25A	Protein component of the small (40S) ribosomal subunit	-0.384375	0.164781	Not-significant	0.726482	9.72935e-05	Significant
YJR007W	SUI2	Alpha subunit of the translation initiation factor eIF2	-0.0202604	0.971334	Not-significant	0.725447	2.72837e-06	Significant
YPR094W	RDS3	Component of the SF3b subcomplex of the U2 snRNP	-0.122574	0.76995	Not-significant	0.725057	4.9028e-05	Significant
YCR024C-A	PMP1	Regulatory subunit for the plasma membrane H(+)-ATPase Pma1p	-0.119844	0.880078	Not-significant	0.724066	0.0166975	Significant
YNL066W	SUN4	Cell wall protein related to glucanases	0.195103	0.579984	Not-significant	0.722936	0.000665716	Significant
YKR063C	LAS1	Protein required for pre-rRNA processing at both ends of ITS2	-0.121705	0.646069	Not-significant	0.722821	3.00677e-08	Significant
YLR452C	SST2	GTPase-activating protein for Gpa1p	-0.120246	0.891189	Not-significant	0.721849	0.00981369	Significant
YLR390W-A	CCW14	Covalently linked cell wall glycoprotein	0.167096	0.626339	Not-significant	0.720491	4.81252e-06	Significant
YJL084C	ALY2	Alpha arrestin	-0.0351413	0.946722	Not-significant	0.720341	3.45569e-08	Significant
YBL060W	YEL1	Guanine nucleotide exchange factor specific for Arf3p	-0.1207	0.746997	Not-significant	0.719635	1.0525e-06	Significant
YNL247W	YNL247W	Cysteinyl-tRNA synthetase	-0.124787	0.32384	Not-significant	0.719342	5.26244e-13	Significant
YDR508C	GNP1	High-affinity glutamine permease	0.0100449	0.971645	Not-significant	0.719065	9.18767e-22	Significant
YPL151C	PRP46	Member of the NineTeen Complex (NTC)	0.0361628	0.94657	Not-significant	0.71827	1.88025e-06	Significant
YLL061W	MMP1	High-affinity S-methylmethionine permease	0.306259	0.416214	Not-significant	0.717968	1.0832e-05	Significant
YJR055W	HIT1	Protein involved in C/D snoRNP assembly	-0.0382994	0.962099	Not-significant	0.717731	0.00313292	Significant
YNR003C	RPC34	RNA polymerase III subunit C34	-0.137993	0.699979	Not-significant	0.717686	2.28542e-06	Significant
YML035C	AMD1	AMP deaminase	0.114431	0.55272	Not-significant	0.716211	5.54197e-16	Significant
YGL236C	MTO1	Mitochondrial protein	0.0246172	0.966894	Not-significant	0.715799	2.71232e-07	Significant
YHR032W-A	YHR032W-A	Dubious open reading frame	-0.14332	0.820814	Not-significant	0.71417	0.00836552	Significant
YBL068W-A	YBL068W-A	Dubious open reading frame	-0.275497	0.564209	Not-significant	0.713963	0.00402785	Significant
YML081W	TDA9	Transcription factor that regulates acetate production	-0.466954	0.0302042	Significant	0.713137	1.80819e-05	Significant
YDR039C	ENA2	P-type ATPase sodium pump	-0.0121069	0.987808	Not-significant	0.712908	3.5431e-06	Significant
YDR077W	SED1	Major stress-induced structural GPI-cell wall glycoprotein	0.381302	0.0242484	Significant	0.711831	6.75977e-09	Significant
YKR036C	CAF4	WD40 repeat-containing protein associated with the CCR4-NOT complex	-0.108035	0.708825	Not-significant	0.711507	1.08839e-08	Significant
YDR266C	YDR266C	RING finger ubiquitin ligase (E3)	-0.0440653	0.888015	Not-significant	0.7114	3.02708e-07	Significant
YPL204W	HRR25	Protein kinase	-0.0332061	0.919095	Not-significant	0.711349	2.08804e-14	Significant
YGL202W	ARO8	Aromatic aminotransferase I	-0.274123	0.145726	Not-significant	0.711239	5.09597e-07	Significant
YOR098C	NUP1	FG-nucleoporin component of central core of the nuclear pore complex	-0.0752635	0.864259	Not-significant	0.711138	5.07899e-07	Significant
YLR057W	MNL2	Putative mannosidase involved in ER-associated protein degradation	-0.0761746	0.786157	Not-significant	0.711095	3.1986e-12	Significant
YLR287C-A	RPS30A	Protein component of the small (40S) ribosomal subunit	-0.289181	0.287556	Not-significant	0.709062	1.16208e-05	Significant
YNL068C	FKH2	Forkhead family transcription factor	-0.101203	0.780146	Not-significant	0.708902	9.47232e-10	Significant
YBL069W	AST1	Lipid raft associated protein	-0.208513	0.380637	Not-significant	0.708362	1.94291e-06	Significant
YKL060C	FBA1	Fructose 1,6-bisphosphate aldolase	-0.0772103	0.886222	Not-significant	0.708324	0.000122863	Significant
YHL008C	YHL008C	Putative protein of unknown function	0.12681	0.646069	Not-significant	0.706326	8.95511e-06	Significant
YOL052C	SPE2	S-adenosylmethionine decarboxylase	-0.0942222	0.809499	Not-significant	0.704563	1.10906e-06	Significant
YDR045C	RPC11	RNA polymerase III subunit C11	-0.188949	0.632971	Not-significant	0.703446	0.000221806	Significant
YDR156W	RPA14	RNA polymerase I subunit A14	0.091661	0.851018	Not-significant	0.70319	0.00017549	Significant
YKR059W	TIF1	Translation initiation factor eIF4A	-0.27539	0.193956	Not-significant	0.700768	2.52528e-06	Significant
YOR007C	SGT2	Glutamine-rich cytoplasmic cochaperone	0.532392	1.27282e-08	Significant	0.700117	1.42815e-10	Significant
YKL139W	CTK1	Catalytic (alpha) subunit of C-terminal domain kinase I (CTDK-I)	0.0374131	0.949985	Not-significant	0.700041	7.80393e-06	Significant
YNL268W	LYP1	Lysine permease	0.0159023	0.96693	Not-significant	0.69941	3.6559e-13	Significant
YER130C	YER130C	Transcription factor that binds IME1 Upstream Activation Signal (UAS)	-0.17255	0.314917	Not-significant	0.697925	1.12266e-08	Significant
YPR159W	KRE6	Type II integral membrane protein	0.0437299	0.907594	Not-significant	0.697635	9.08761e-09	Significant
YJL139C	YUR1	Mannosyltransferase involved in protein N-glycosylation	-0.210865	0.325357	Not-significant	0.697548	2.81517e-07	Significant
YPL277C	YPL277C	Putative protein of unknown function	-0.0287263	0.965859	Not-significant	0.697432	0.00132234	Significant
YOR308C	SNU66	Component of the U4/U6.U5 snRNP complex	0.079298	0.844594	Not-significant	0.697417	4.14511e-06	Significant
YGR229C	SMI1	Protein involved in the regulation of cell wall synthesis	-0.113563	0.679782	Not-significant	0.696214	3.33385e-08	Significant
YCR012W	PGK1	3-phosphoglycerate kinase	0.305402	0.23531	Not-significant	0.695552	3.55083e-05	Significant
YJL071W	ARG2	Acetylglutamate synthase (glutamate N-acetyltransferase)	0.0342762	0.946265	Not-significant	0.694744	5.50506e-08	Significant
YDR213W	UPC2	Sterol regulatory element binding protein	0.0853004	0.873296	Not-significant	0.694477	0.000188942	Significant
YEL029C	BUD16	Putative pyridoxal kinase	-0.072564	0.867404	Not-significant	0.691423	1.39023e-05	Significant
YMR205C	PFK2	Beta subunit of heterooctameric phosphofructokinase	0.0915498	0.642268	Not-significant	0.688222	1.21428e-09	Significant
YBL072C	RPS8A	Protein component of the small (40S) ribosomal subunit	-0.270303	0.374204	Not-significant	0.688161	7.97108e-05	Significant
YOR034C	AKR2	Ankyrin repeat-containing protein	0.209729	0.413301	Not-significant	0.686887	3.10703e-06	Significant
YHR005C	GPA1	Subunit of the G protein involved in pheromone response	-0.192877	0.365364	Not-significant	0.685922	7.84066e-07	Significant
YOR252W	TMA16	Protein of unknown function that associates with ribosomes	-0.184992	0.653257	Not-significant	0.684188	0.000620182	Significant
YLR420W	URA4	Dihydroorotase	-0.163591	0.482409	Not-significant	0.683712	3.97951e-10	Significant
YDR217C	RAD9	DNA damage-dependent checkpoint protein	-0.119227	0.805977	Not-significant	0.683384	8.93803e-05	Significant
YGR055W	MUP1	High affinity methionine permease	0.426369	0.275273	Not-significant	0.683025	0.00336832	Significant
YGL045W	RIM8	Protein involved in proteolytic activation of Rim101p	-0.217505	0.208056	Not-significant	0.677309	9.06371e-06	Significant
YFL022C	FRS2	Alpha subunit of cytoplasmic phenylalanyl-tRNA synthetase	-0.111282	0.717305	Not-significant	0.676719	8.58846e-08	Significant
YNL282W	POP3	Subunit of both RNase MRP and nuclear RNase P	0.176933	0.714998	Not-significant	0.675715	0.00177518	Significant
YDR065W	RRG1	Protein of unknown function	0.0871898	0.893801	Not-significant	0.675506	0.00433802	Significant
YIL118W	RHO3	Non-essential small GTPase of the Rho/Rac family of Ras-like proteins	0.155147	0.723496	Not-significant	0.674036	0.000228003	Significant
YGR166W	TRS65	Component of transport protein particle (TRAPP) complex II	0.209867	0.550713	Not-significant	0.672964	0.00045312	Significant
YKL110C	KTI12	Protein that plays a role in modification of tRNA wobble nucleosides	-0.343127	0.144559	Not-significant	0.671078	3.98545e-06	Significant
YNL086W	SNN1	Subunit of the BLOC-1 complex involved in endosomal maturation	-0.313899	0.545714	Not-significant	0.670096	0.0137978	Significant
YDR109C	YDR109C	Putative kinase	-0.0171579	0.969021	Not-significant	0.669131	3.75698e-09	Significant
YNR013C	PHO91	Low-affinity vacuolar phosphate transporter	0.15106	0.405878	Not-significant	0.667924	7.39132e-08	Significant
YDR403W	DIT1	Sporulation-specific enzyme required for spore wall maturation	0.215055	0.562083	Not-significant	0.66652	0.00238528	Significant
YBR259W	YBR259W	Protein of unknown function	0.0642632	0.942008	Not-significant	0.665461	0.0154086	Significant
YER171W	RAD3	5' to 3' DNA helicase	-0.0172823	0.968898	Not-significant	0.664154	4.42691e-09	Significant
YER025W	GCD11	Gamma subunit of the translation initiation factor eIF2	-0.155701	0.380179	Not-significant	0.663849	9.67725e-09	Significant
YGR233C	PHO81	Cyclin-dependent kinase (CDK) inhibitor	-0.278698	0.44974	Not-significant	0.662032	0.00286214	Significant
YGL055W	OLE1	Delta(9) fatty acid desaturase	-0.161076	0.706794	Not-significant	0.66165	1.56337e-05	Significant
YDR140W	MTQ2	S-adenosylmethionine-dependent methyltransferase	0.0180097	0.974836	Not-significant	0.66081	0.000272412	Significant
YKL104C	GFA1	Glutamine-fructose-6-phosphate amidotransferase	0.236091	0.197437	Not-significant	0.659041	1.87061e-08	Significant
YHR068W	DYS1	Deoxyhypusine synthase	-0.120952	0.704107	Not-significant	0.658874	1.65115e-07	Significant
YER077C	YER077C	Protein that associates with mitochondrial ribosome	-0.00468381	0.995729	Not-significant	0.65884	1.99845e-05	Significant
YDR232W	HEM1	5-aminolevulinate synthase	-0.489473	8.12603e-06	Significant	0.658602	6.19351e-10	Significant
YAL035W	FUN12	Translation initiation factor eIF5B	-0.102314	0.54096	Not-significant	0.658387	2.26288e-14	Significant
YHR204W	MNL1	Alpha-1,2-specific exomannosidase of the endoplasmic reticulum	-0.066076	0.858798	Not-significant	0.657531	8.8105e-08	Significant
YKL072W	STB6	Protein that binds Sin3p in a two-hybrid assay	-0.180139	0.62168	Not-significant	0.657306	0.00117905	Significant
YGL243W	TAD1	tRNA-specific adenosine deaminase	-0.137567	0.626339	Not-significant	0.656834	9.25412e-07	Significant
YGR068C	ART5	Protein proposed to regulate endocytosis of plasma membrane proteins	0.111103	0.733209	Not-significant	0.656648	4.97353e-05	Significant
YLR451W	LEU3	Zinc-knuckle transcription factor, repressor and activator	-0.0715258	0.792483	Not-significant	0.656266	5.86676e-10	Significant
YLR016C	PML1	Subunit of the RES complex	0.0569894	0.943125	Not-significant	0.655729	0.00287547	Significant
YFL024C	EPL1	Subunit of NuA4, an essential histone H4/H2A acetyltransferase complex	-0.13211	0.791083	Not-significant	0.653629	0.000183576	Significant
YMR260C	TIF11	Translation initiation factor eIF1A	-0.188613	0.589034	Not-significant	0.653001	3.52859e-05	Significant
YHR084W	STE12	Transcription factor that is activated by a MAPK signaling cascade	-0.14955	0.558345	Not-significant	0.652044	2.82025e-07	Significant
YMR265C	YMR265C	Putative protein of unknown function	0.23677	0.571378	Not-significant	0.651846	0.00181377	Significant
YBR125C	PTC4	Cytoplasmic type 2C protein phosphatase (PP2C)	0.00230374	0.997024	Not-significant	0.651731	6.03976e-09	Significant
YHL009W-B	YHL009W-B	Retrotransposon TYA Gag and TYB Pol genes	-0.221527	0.796217	Not-significant	0.651068	0.0426367	Significant
YLL010C	PSR1	Plasma membrane associated protein phosphatase	0.0494565	0.890077	Not-significant	0.649556	2.74447e-10	Significant
YMR062C	ARG7	Mitochondrial ornithine acetyltransferase	-0.282548	0.381264	Not-significant	0.649016	0.000556515	Significant
YOR361C	PRT1	eIF3b subunit of the eukaryotic translation initiation factor 3 (eIF3)	-0.100997	0.660749	Not-significant	0.648962	2.81563e-13	Significant
YJL110C	GZF3	GATA zinc finger protein	-0.0885949	0.809499	Not-significant	0.64882	1.30027e-06	Significant
YGR217W	CCH1	Voltage-gated high-affinity calcium channel	-0.186078	0.655178	Not-significant	0.648227	0.00020511	Significant
YGL211W	NCS6	Protein required for uridine thiolation of Gln, Lys, and Glu tRNAs	0.0329747	0.948944	Not-significant	0.647649	1.07544e-05	Significant
YMR235C	RNA1	GTPase activating protein (GAP) for Gsp1p	-0.151369	0.423283	Not-significant	0.64753	6.55242e-07	Significant
YGL013C	PDR1	Transcription factor that regulates the pleiotropic drug response	0.247891	0.372932	Not-significant	0.647011	0.000159563	Significant
YHR134W	WSS1	Metalloprotease involved in DNA repair, removes DNA-protein crosslink	-0.0334242	0.959733	Not-significant	0.646134	0.000107364	Significant
YOL020W	TAT2	High affinity tryptophan and tyrosine permease	-0.0502624	0.882796	Not-significant	0.645625	3.31987e-08	Significant
YIL051C	MMF1	Mitochondrial protein required for transamination of isoleucine	-0.242031	0.33902	Not-significant	0.645145	2.10045e-06	Significant
YGL035C	MIG1	Transcription factor involved in glucose repression	-0.0653159	0.882999	Not-significant	0.6446	0.000247269	Significant
YNR024W	MPP6	Nuclear exosome-associated RNA binding protein	-0.078354	0.885119	Not-significant	0.644539	0.000106127	Significant
YCL025C	AGP1	Low-affinity amino acid permease with broad substrate range	0.0427619	0.953866	Not-significant	0.642782	0.000200161	Significant
YEL033W	MTC7	Protein of unknown function	-0.253762	0.218158	Not-significant	0.642682	4.7972e-06	Significant
YGL146C	RRT6	Putative protein of unknown function	-0.76108	2.32003e-10	Significant	0.642646	1.06534e-05	Significant
YKL081W	TEF4	Gamma subunit of translational elongation factor eEF1B	-0.206434	0.458203	Not-significant	0.641696	4.36586e-05	Significant
YPL157W	TGS1	Trimethyl guanosine synthase, conserved nucleolar methyl transferase	-0.00210308	0.997596	Not-significant	0.641416	0.000574344	Significant
YLR359W	ADE13	Adenylosuccinate lyase	0.106065	0.811973	Not-significant	0.64108	9.18962e-06	Significant
YLR150W	STM1	Protein required for optimal translation under nutrient stress	-0.143563	0.699651	Not-significant	0.640934	0.000109144	Significant
YMR100W	MUB1	MYND domain-containing protein	-0.0532728	0.923769	Not-significant	0.639846	0.000123328	Significant
YFL002C	SPB4	Putative ATP-dependent RNA helicase	-0.0734429	0.807031	Not-significant	0.639801	1.4344e-09	Significant
YLR403W	SFP1	Regulates transcription of ribosomal protein and biogenesis genes	-0.0245716	0.959197	Not-significant	0.639752	9.3131e-09	Significant
YNL064C	YDJ1	Type I HSP40 co-chaperone	0.242666	0.214716	Not-significant	0.639608	3.12087e-06	Significant
YDR259C	YAP6	Basic leucine zipper (bZIP) transcription factor	0.554444	0.0220448	Significant	0.638055	0.000937512	Significant
YDR310C	SUM1	Transcriptional repressor that regulates middle-sporulation genes	-0.101371	0.658965	Not-significant	0.637272	1.85316e-10	Significant
YDR280W	RRP45	Exosome non-catalytic core component	-0.0844883	0.86307	Not-significant	0.637172	2.89049e-05	Significant
YDR464W	SPP41	Protein of unknown function	-0.0130285	0.97264	Not-significant	0.637047	6.42508e-09	Significant
YDL184C	RPL41A	Ribosomal 60S subunit protein L41A	-0.405061	0.201309	Not-significant	0.636576	0.000146985	Significant
YJL149W	DAS1	Putative SCF ubiquitin ligase F-box protein	0.351159	0.358732	Not-significant	0.632836	0.0038705	Significant
YMR268C	PRP24	Splicing factor that reanneals snRNPs during spliceosome recycling	-0.0651668	0.919095	Not-significant	0.63157	0.00126212	Significant
YDR103W	STE5	Pheromone-responsive MAPK scaffold protein	-0.0873968	0.812036	Not-significant	0.629686	2.94941e-05	Significant
YER075C	PTP3	Phosphotyrosine-specific protein phosphatase	-0.0374204	0.951865	Not-significant	0.629368	0.000200236	Significant
YNR004W	SWM2	Protein with a role in snRNA and snoRNA cap trimethylation	-0.0131552	0.987755	Not-significant	0.62881	0.00424717	Significant
YML114C	TAF8	TFIID subunit (65 kDa)	0.0269573	0.962099	Not-significant	0.628521	6.35095e-05	Significant
YCR092C	MSH3	Mismatch repair protein	0.0516789	0.915452	Not-significant	0.628015	5.25526e-05	Significant
YCR008W	SAT4	Ser/Thr protein kinase involved in salt tolerance	-0.355194	0.00220823	Significant	0.625118	1.77309e-08	Significant
YNL001W	DOM34	Protein that facilitates ribosomal subunit dissociation	-0.00574703	0.995013	Not-significant	0.62511	0.00201611	Significant
YMR010W	YMR010W	Putative protein of unknown function	0.224767	0.633675	Not-significant	0.623953	0.00530713	Significant
YGR256W	GND2	6-phosphogluconate dehydrogenase (decarboxylating)	1.17963	1.03471e-10	Up-regulated	0.623856	0.00318548	Significant
YDL127W	PCL2	Cyclin, interacts with cyclin-dependent kinase Pho85p	-0.0541524	0.899432	Not-significant	0.623209	2.20862e-05	Significant
YML046W	PRP39	U1 snRNP protein involved in splicing	-0.265842	0.669357	Not-significant	0.622109	0.0278551	Significant
YGL064C	MRH4	Mitochondrial ATP-dependent RNA helicase of the DEAD-box family	-0.0229623	0.959733	Not-significant	0.621177	1.10522e-05	Significant
YLR430W	SEN1	Presumed helicase and subunit of the Nrd1 complex (Nrd1p-Nab3p-Sen1p)	0.0546222	0.899548	Not-significant	0.620642	9.56638e-08	Significant
YML111W	BUL2	Component of the Rsp5p E3-ubiquitin ligase complex	0.0228214	0.963393	Not-significant	0.620088	2.48164e-05	Significant
YNL151C	RPC31	RNA polymerase III subunit C31	-0.171166	0.560479	Not-significant	0.620052	2.40447e-05	Significant
YDR492W	IZH1	Membrane protein involved in zinc ion homeostasis	-0.227676	0.446144	Not-significant	0.619533	1.19563e-05	Significant
YOL081W	IRA2	GTPase-activating protein	0.189168	0.813314	Not-significant	0.619082	0.0333561	Significant
YCL031C	RRP7	Essential protein involved in rRNA processing and ribosome biogenesis	-0.159392	0.660749	Not-significant	0.618504	0.000320965	Significant
YBR017C	KAP104	Transportin or cytosolic karyopherin beta 2	0.141881	0.461431	Not-significant	0.618186	6.15115e-09	Significant
YPR168W	NUT2	Subunit of the RNA polymerase II mediator complex	-0.0192	0.974595	Not-significant	0.618095	0.000849522	Significant
YKL079W	SMY1	Kinesin-like myosin passenger-protein	0.154747	0.508864	Not-significant	0.617118	6.26068e-10	Significant
YIL090W	ICE2	Integral ER membrane protein with type-III transmembrane domains	-0.156428	0.558345	Not-significant	0.613893	0.000157872	Significant
YBR061C	TRM7	2'-O-ribose methyltransferase	-0.115482	0.742274	Not-significant	0.612174	7.41455e-05	Significant
YJL106W	IME2	Serine/threonine protein kinase involved in activation of meiosis	0.0940043	0.900351	Not-significant	0.611963	0.00309402	Significant
YGR211W	ZPR1	Essential protein with two zinc fingers	-0.0436374	0.932358	Not-significant	0.611908	1.16407e-05	Significant
YGR065C	VHT1	High-affinity plasma membrane H+-biotin (vitamin H) symporter	0.222225	0.295383	Not-significant	0.611043	2.30195e-05	Significant
YGR234W	YHB1	Nitric oxide oxidoreductase	-2.02452	2.49326e-35	Down-regulated	0.609698	1.38393e-08	Significant
YDR482C	CWC21	Protein involved in RNA splicing by the spliceosome	-0.145315	0.848204	Not-significant	0.605753	0.0196802	Significant
YDR461W	MFA1	Mating pheromone a-factor	-0.137688	0.767818	Not-significant	0.605676	0.0160763	Significant
YMR079W	SEC14	Phosphatidylinositol/phosphatidylcholine transfer protein	-0.03191	0.931744	Not-significant	0.605448	8.06312e-12	Significant
YLR440C	SEC39	Component of the Dsl1p tethering complex	-0.0325858	0.940564	Not-significant	0.605393	3.98545e-06	Significant
YKL184W	SPE1	Ornithine decarboxylase	-0.523256	2.96001e-05	Significant	0.604881	1.02761e-06	Significant
YHR025W	THR1	Homoserine kinase	-0.206435	0.552023	Not-significant	0.604413	0.000576119	Significant
YBL049W	MOH1	Protein of unknown function	0.290308	0.296047	Not-significant	0.604388	0.000315917	Significant
YNL255C	GIS2	Translational activator for mRNAs with internal ribosome entry sites	-0.163911	0.701405	Not-significant	0.60435	0.00125044	Significant
YOL098C	YOL098C	Putative metalloprotease	0.068446	0.88422	Not-significant	0.603039	0.000118002	Significant
YHR047C	AAP1	Arginine/alanine amino peptidase	-0.234349	0.256075	Not-significant	0.602769	1.17528e-06	Significant
YDL043C	PRP11	Subunit of the SF3a splicing factor complex	0.0198736	0.969091	Not-significant	0.602205	6.54633e-05	Significant
YCR020C	PET18	Protein of unknown function	-0.034693	0.966543	Not-significant	0.602042	0.00650316	Significant
YMR015C	ERG5	C-22 sterol desaturase	-0.25476	0.4418	Not-significant	0.601467	0.00110991	Significant
YBR121C-A	YBR121C-A	Dubious open reading frame	-0.170653	0.780374	Not-significant	0.601433	0.00570358	Significant
YGL016W	KAP122	Karyopherin beta	-0.215018	0.593517	Not-significant	0.601213	0.0139904	Significant
YBR121C	GRS1	Cytoplasmic and mitochondrial glycyl-tRNA synthase	-0.196288	0.20052	Not-significant	0.601096	3.10582e-09	Significant
YNR066C	YNR066C	Putative membrane-localized protein of unknown function	0.563502	0.098034	Not-significant	0.600832	0.0350901	Significant
YFR009W-A	YFR009W-A	Dubious open reading frame	0.0246893	0.971334	Not-significant	0.600756	0.00131663	Significant
YLR015W	BRE2	Subunit of COMPASS (Set1C) complex	-0.0140199	0.982735	Not-significant	0.599879	1.28079e-05	Significant
YLR199C	PBA1	Protein involved in 20S proteasome assembly	0.123628	0.622156	Not-significant	0.59965	1.75143e-05	Significant
YLR004C	THI73	Putative plasma membrane permease	-0.188146	0.688522	Not-significant	0.599021	0.00422749	Significant
YML097C	VPS9	Guanine nucleotide exchange factor (GEF)	-0.202177	0.394972	Not-significant	0.597265	3.10384e-06	Significant
YOR238W	YOR238W	Putative protein of unknown function	0.103735	0.82267	Not-significant	0.596914	0.000104254	Significant
YCR063W	BUD31	Component of the SF3b subcomplex of the U2 snRNP	0.520245	0.0867762	Not-significant	0.596684	0.0292003	Significant
YDR421W	ARO80	Zinc finger transcriptional activator of the Zn2Cys6 family	-0.445384	0.000226838	Significant	0.596639	1.81081e-07	Significant
YEL034W	HYP2	Translation elongation factor eIF-5A	-0.262744	0.290115	Not-significant	0.595164	0.000416262	Significant
YGL133W	ITC1	Subunit of ATP-dependent Isw2p-Itc1p chromatin remodeling complex	0.109276	0.767818	Not-significant	0.594723	3.62927e-06	Significant
YML106W	URA5	Major orotate phosphoribosyltransferase (OPRTase) isozyme	-0.257667	0.234956	Not-significant	0.594629	7.39616e-06	Significant
YNL021W	HDA1	Putative catalytic subunit of a class II histone deacetylase complex	-0.101752	0.719694	Not-significant	0.594431	1.93897e-07	Significant
YIL020C	HIS6	Enzyme that catalyzes the fourth step in the histidine pathway	-0.134999	0.656569	Not-significant	0.593989	5.8698e-05	Significant
YOR233W	KIN4	Serine/threonine protein kinase	-0.0438952	0.890089	Not-significant	0.593734	2.35097e-07	Significant
YGR192C	TDH3	Glyceraldehyde-3-phosphate dehydrogenase (GAPDH), isozyme 3	0.203727	0.5727	Not-significant	0.593583	0.00101129	Significant
YJL087C	TRL1	tRNA ligase	-0.0724764	0.886448	Not-significant	0.590718	0.000184737	Significant
YBR203W	COS111	Protein required for antifungal drug ciclopirox olamine resistance	0.330323	0.285167	Not-significant	0.589722	0.0111724	Significant
YLR008C	PAM18	Subunit of the import motor (PAM complex)	-0.0679656	0.882796	Not-significant	0.589453	4.36586e-05	Significant
YMR146C	TIF34	eIF3i subunit of the eukaryotic translation initiation factor 3 (eIF3)	-0.0853664	0.833677	Not-significant	0.589329	8.86317e-05	Significant
YGR195W	SKI6	Exosome non-catalytic core component	-0.0120505	0.983139	Not-significant	0.589021	9.57219e-05	Significant
YCR051W	YCR051W	Putative protein of unknown function	-0.0648737	0.921724	Not-significant	0.588422	0.00248673	Significant
YDL235C	YPD1	Osmotic stress-responsive phosphorelay intermediate sensor protein	-0.0015574	0.997596	Not-significant	0.585116	9.58447e-05	Significant
YBR256C	RIB5	Riboflavin synthase	-0.207437	0.497256	Not-significant	0.584839	0.000128094	Significant
YDR066C	RTR2	Protein of unknown function	-0.147924	0.862643	Not-significant	0.584739	0.0300657	Significant
YPR164W	MMS1	Subunit of E3 ubiquitin ligase complex involved in replication repair	-0.0845386	0.863626	Not-significant	0.58323	0.00060502	Significant
YDR429C	TIF35	eIF3g subunit of the eukaryotic translation initiation factor 3 (eIF3)	-0.120314	0.718349	Not-significant	0.582812	1.5051e-05	Significant
YMR034C	YMR034C	Putative transporter	-0.468873	0.214716	Not-significant	0.582767	0.0104361	Significant
YIR029W	DAL2	Allantoicase	-1.32973	5.5513e-21	Down-regulated	0.582599	4.81785e-07	Significant
YKR086W	PRP16	DEAH-box RNA helicase involved in second catalytic step of splicing a	-0.195388	0.253732	Not-significant	0.582075	3.17606e-07	Significant
YKR013W	PRY2	Sterol binding protein involved in the export of acetylated sterols	-0.155239	0.700673	Not-significant	0.581958	0.00137707	Significant
YER105C	NUP157	Subunit of the inner ring of the nuclear pore complex (NPC)	-0.0529994	0.926412	Not-significant	0.580959	0.000117851	Significant
YBL036C	YBL036C	Putative non-specific single-domain racemase	-0.136964	0.628486	Not-significant	0.579701	2.13203e-06	Significant
YOR281C	PLP2	Protein that interacts with the CCT complex to stimulate actin folding	-0.0133449	0.976689	Not-significant	0.579141	2.01996e-06	Significant
YLR010C	TEN1	Protein that regulates telomeric length	0.327497	0.396745	Not-significant	0.578191	0.0280343	Significant
YOR154W	SLP1	Glycosylated integral ER membrane protein of unknown function	-0.217095	0.540883	Not-significant	0.57805	0.00528679	Significant
YNL251C	NRD1	RNA-binding subunit of Nrd1 complex	-0.0896247	0.772495	Not-significant	0.577573	0.000296981	Significant
YER128W	VFA1	Protein that interacts with Vps4p and has a role in vacuolar sorting	0.0190077	0.975795	Not-significant	0.577485	0.00152972	Significant
YPR007C	REC8	Meiosis-specific component of sister chromatid cohesion complex	0.478882	0.145726	Not-significant	0.577269	0.0410489	Significant
YKL152C	GPM1	Tetrameric phosphoglycerate mutase	0.153974	0.684265	Not-significant	0.57696	0.000381718	Significant
YGL092W	NUP145	Essential protein with distinct roles in two nuclear pore subcomplexes	-0.122088	0.770444	Not-significant	0.576245	0.000200161	Significant
YMR012W	CLU1	Subunit of the eukaryotic translation initiation factor 3 (eIF3)	-0.429977	0.0630506	Not-significant	0.576127	0.0022015	Significant
YPL170W	DAP1	Heme-binding protein	0.255268	0.542431	Not-significant	0.575692	0.00464539	Significant
YMR127C	SAS2	Histone acetyltransferase (HAT) catalytic subunit of the SAS complex	-0.267797	0.174938	Not-significant	0.574084	4.02686e-05	Significant
YLL004W	ORC3	Subunit of the origin recognition complex (ORC)	0.0780838	0.907311	Not-significant	0.57253	0.0196164	Significant
YKR044W	UIP5	Protein of unknown function that interacts with Ulp1p	-0.139903	0.708137	Not-significant	0.572098	0.000292996	Significant
YPL125W	KAP120	Karyopherin responsible for the nuclear import of Rpf1p	-0.093783	0.880078	Not-significant	0.571654	0.0103287	Significant
YMR303C	ADH2	Glucose-repressible alcohol dehydrogenase II	0.528608	0.0999522	Not-significant	0.571142	0.015996	Significant
YMR129W	POM152	Glycoprotein subunit of transmembrane ring of nuclear pore complex	-0.207557	0.40986	Not-significant	0.569085	6.97589e-05	Significant
YER090W	TRP2	Anthranilate synthase	-0.138258	0.386361	Not-significant	0.568377	1.30784e-06	Significant
YDL143W	CCT4	Subunit of the cytosolic chaperonin Cct ring complex	-0.0345149	0.932485	Not-significant	0.568355	2.19703e-07	Significant
YJL209W	CBP1	Mitochondrial protein, regulator of COB mRNA stability and translation	0.147398	0.471791	Not-significant	0.56806	5.23058e-06	Significant
YGL157W	ARI1	NADPH-dependent aldehyde reductase	0.109107	0.825932	Not-significant	0.567338	0.000796272	Significant
YLR265C	NEJ1	Protein involved in regulation of nonhomologous end joining	-0.193125	0.778152	Not-significant	0.566577	0.0105355	Significant
YNL316C	PHA2	Prephenate dehydratase	-0.0491542	0.930078	Not-significant	0.566517	0.000743806	Significant
YOR271C	FSF1	Putative protein	-0.653763	0.000387379	Significant	0.566166	0.00279413	Significant
YMR124W	YMR124W	Protein involved in septin-ER tethering	0.397393	0.00866722	Significant	0.564901	7.37358e-06	Significant
YMR238W	DFG5	Putative mannosidase	0.288086	0.211222	Not-significant	0.564151	0.000163812	Significant
YML005W	TRM12	S-adenosylmethionine-dependent methyltransferase	0.00233238	0.997024	Not-significant	0.563842	7.95682e-05	Significant
YOR344C	TYE7	Serine-rich protein that contains a bHLH DNA binding motif	0.0532564	0.926801	Not-significant	0.563523	2.10773e-06	Significant
YIL002W-A	YIL002W-A	Putative protein of unknown function	-0.24356	0.524507	Not-significant	0.562631	0.00171064	Significant
YNL035C	YNL035C	Nuclear protein of unknown function	-0.047487	0.922618	Not-significant	0.562453	6.64678e-05	Significant
YIL035C	CKA1	Alpha catalytic subunit of casein kinase 2 (CK2)	-0.0978914	0.82352	Not-significant	0.562301	0.00674378	Significant
YHR115C	DMA1	Ubiquitin-protein ligase (E3)	-0.110394	0.728406	Not-significant	0.560248	4.17265e-05	Significant
YDR233C	RTN1	Reticulon protein	0.00793343	0.988275	Not-significant	0.560046	1.81815e-06	Significant
YPR016C	TIF6	Constituent of 66S pre-ribosomal particles	-0.029116	0.958242	Not-significant	0.559429	1.49565e-05	Significant
YPL029W	SUV3	ATP-dependent RNA helicase	0.018111	0.963393	Not-significant	0.55883	5.06249e-07	Significant
YOR322C	LDB19	Alpha-arrestin involved in ubiquitin-dependent endocytosis	-0.031211	0.940564	Not-significant	0.558713	2.88854e-07	Significant
YOR166C	SWT1	RNA endoribonuclease involved in perinuclear mRNP quality control	-0.252134	0.564713	Not-significant	0.556871	0.0223491	Significant
YNL245C	CWC25	Splicing factor required for the first step of pre-mRNA splicing	-0.0847946	0.87535	Not-significant	0.556297	0.0099997	Significant
YLR096W	KIN2	Serine/threonine protein kinase involved in regulation of exocytosis	0.0038949	0.995729	Not-significant	0.556227	2.03101e-05	Significant
YHR032W	ERC1	Member of the multi-drug and toxin extrusion (MATE) family	0.153159	0.587912	Not-significant	0.555711	3.44722e-05	Significant
YDR038C	ENA5	Protein with similarity to P-type ATPase sodium pumps	-0.147478	0.616929	Not-significant	0.552987	6.83127e-05	Significant
YGL195W	GCN1	Positive regulator of the Gcn2p kinase activity	-0.210113	0.418376	Not-significant	0.552219	0.000166598	Significant
YER093C	TSC11	Subunit of TORC2 (Tor2p-Lst8p-Avo1-Avo2-Tsc11p-Bit61p)	-0.116073	0.826017	Not-significant	0.55219	0.002318	Significant
YMR069W	NAT4	N alpha-acetyl-transferase	0.569511	0.0498479	Significant	0.550954	0.0276804	Significant
YNL155W	YNL155W	Protein with a role in the ubiquitin-proteasome pathway	0.346262	0.00145315	Significant	0.550734	2.16875e-05	Significant
YLR291C	GCD7	Beta subunit of the translation initiation factor eIF2B	-0.0362136	0.919232	Not-significant	0.549988	7.33031e-08	Significant
YHR206W	SKN7	Nuclear response regulator and transcription factor	0.00600228	0.990131	Not-significant	0.549831	6.3237e-07	Significant
YFR036W	CDC26	Subunit of the Anaphase-Promoting Complex/Cyclosome (APC/C)	0.0188219	0.977414	Not-significant	0.549665	0.00737312	Significant
YHL013C	OTU2	Protein of unknown function	0.00504078	0.993506	Not-significant	0.549369	4.44758e-05	Significant
YHR209W	CRG1	S-AdoMet-dependent methyltransferase involved in lipid homeostasis	0.673035	0.00109914	Significant	0.54853	0.000160928	Significant
YLR431C	ATG23	Peripheral membrane protein required for autophagy and CVT	0.417702	0.0321558	Significant	0.548326	0.000259271	Significant
YPL237W	SUI3	Beta subunit of the translation initiation factor eIF2	-0.0829163	0.84354	Not-significant	0.548129	1.74725e-05	Significant
YAL005C	SSA1	ATPase involved in protein folding and NLS-directed nuclear transport	0.350127	0.0928213	Not-significant	0.547773	0.00242499	Significant
YBR184W	YBR184W	Putative protein of unknown function	0.137452	0.835989	Not-significant	0.545014	0.0313695	Significant
YIL126W	STH1	ATPase component of the RSC chromatin remodeling complex	-0.0828701	0.793958	Not-significant	0.544924	6.93739e-07	Significant
YJL186W	MNN5	Alpha-1,2-mannosyltransferase	0.0298028	0.953279	Not-significant	0.544482	8.86115e-05	Significant
YOR046C	DBP5	Cytoplasmic ATP-dependent RNA helicase of the DEAD-box family	-0.0176099	0.955329	Not-significant	0.544208	4.08e-10	Significant
YNL240C	NAR1	Subunit of the cytosolic iron-sulfur (FeS) protein assembly machinery	0.0757166	0.879999	Not-significant	0.543186	0.00293611	Significant
YPR033C	HTS1	Cytoplasmic and mitochondrial histidine tRNA synthetase	-0.104096	0.669783	Not-significant	0.542793	6.41556e-07	Significant
YDL073W	YDL073W	Putative protein of unknown function	0.436892	0.0816921	Not-significant	0.541978	0.0115379	Significant
YPL265W	DIP5	Dicarboxylic amino acid permease	-0.085814	0.840349	Not-significant	0.540607	2.53926e-06	Significant
YLR138W	NHA1	Na+/H+ antiporter	0.0202669	0.957671	Not-significant	0.540064	2.09605e-08	Significant
YER168C	CCA1	ATP (CTP):tRNA-specific tRNA nucleotidyltransferase	-0.104851	0.754121	Not-significant	0.54005	1.57343e-05	Significant
YGL240W	DOC1	Processivity factor	0.0987002	0.882415	Not-significant	0.538919	0.0301068	Significant
YJL080C	SCP160	Essential RNA-binding G protein effector of mating response pathway	-0.0623998	0.862643	Not-significant	0.53743	6.4126e-05	Significant
YDR034C	LYS14	Transcriptional activator involved in regulating lysine biosynthesis	-0.0310946	0.946036	Not-significant	0.5371	1.36189e-05	Significant
YMR080C	NAM7	ATP-dependent RNA helicase of the SFI superfamily	-0.0377846	0.922618	Not-significant	0.537088	2.66118e-05	Significant
YHR162W	YHR162W	Highly conserved subunit of the mitochondrial pyruvate carrier	0.0328926	0.959733	Not-significant	0.536446	0.0016044	Significant
YLR084C	RAX2	N-glycosylated protein	0.0249169	0.962099	Not-significant	0.53622	0.00107884	Significant
YFR009W	GCN20	Positive regulator of the Gcn2p kinase activity	0.0173906	0.964478	Not-significant	0.535811	2.00875e-06	Significant
YPL095C	EEB1	Acyl-coenzymeA:ethanol O-acyltransferase	-0.563588	0.00311764	Significant	0.535211	0.00205634	Significant
YGR189C	CRH1	Chitin transglycosylase	0.389314	0.0415149	Significant	0.535196	6.82555e-05	Significant
YNL189W	SRP1	Karyopherin alpha homolog	-0.0151721	0.961157	Not-significant	0.53438	4.69125e-12	Significant
YBR074W	YBR074W	Multi-spanning vacuolar membrane protease	-0.273744	0.129155	Not-significant	0.533207	8.19578e-05	Significant
YPR187W	RPO26	RNA polymerase subunit ABC23	-0.209613	0.545483	Not-significant	0.531788	0.00167368	Significant
YJR147W	HMS2	Protein with similarity to heat shock transcription factors	0.135656	0.790578	Not-significant	0.531596	0.0089351	Significant
YDR515W	SLF1	RNA binding protein that associates with polysomes	0.131077	0.756133	Not-significant	0.531158	0.00377096	Significant
YPR161C	SGV1	Cyclin (Bur2p)-dependent protein kinase	0.0436728	0.922255	Not-significant	0.531049	2.61969e-05	Significant
YLR194C	YLR194C	Structural constituent of the cell wall	0.383326	0.177479	Not-significant	0.530299	0.0120145	Significant
YPL097W	MSY1	Mitochondrial tyrosyl-tRNA synthetase	-0.0370642	0.933949	Not-significant	0.528902	5.87975e-06	Significant
YKR043C	SHB17	Sedoheptulose bisphosphatase involved in riboneogenesis	-0.0968732	0.84352	Not-significant	0.528481	0.00161391	Significant
YDL048C	STP4	Protein containing a Kruppel-type zinc-finger domain	0.00949792	0.982735	Not-significant	0.528041	0.00121965	Significant
YDR295C	HDA2	Subunit of the HDA1 histone deacetylase complex	0.0615186	0.867948	Not-significant	0.526364	9.20069e-05	Significant
YOR057W	SGT1	Cochaperone protein	-0.10859	0.701405	Not-significant	0.524852	3.42824e-06	Significant
YOR229W	WTM2	Transcriptional modulator	-0.200829	0.425993	Not-significant	0.524152	0.000338782	Significant
YGL017W	ATE1	Arginyl-tRNA-protein transferase	0.0420959	0.932485	Not-significant	0.52407	6.08864e-05	Significant
YDL209C	CWC2	Member of the NineTeen Complex (NTC)	0.074952	0.859211	Not-significant	0.520059	0.000595848	Significant
YIL122W	POG1	Nuclear chromatin-associated protein of unknown function	0.138686	0.560371	Not-significant	0.519984	7.59398e-07	Significant
YHR205W	SCH9	AGC family protein kinase	-0.0364442	0.907594	Not-significant	0.519593	1.12576e-05	Significant
YOL064C	MET22	Bisphosphate-3'-nucleotidase	-0.0533483	0.912721	Not-significant	0.51912	4.76087e-05	Significant
YDL042C	SIR2	Conserved NAD+ dependent histone deacetylase of the Sirtuin family	0.0557468	0.882796	Not-significant	0.518395	9.69903e-06	Significant
YLR297W	YLR297W	Protein of unknown function	-0.0768187	0.914831	Not-significant	0.518207	0.0144629	Significant
YDR350C	ATP22	Specific translational activator for the mitochondrial ATP6 mRNA	0.0105853	0.985985	Not-significant	0.5181	7.35013e-05	Significant
YGR043C	NQM1	Transaldolase of unknown function	0.778284	0.000108697	Significant	0.516941	0.0026887	Significant
YLL018C-A	COX19	Protein required for cytochrome c oxidase assembly	-0.228105	0.615672	Not-significant	0.516213	0.0385225	Significant
YLL049W	LDB18	Component of the dynactin complex	0.0573429	0.933046	Not-significant	0.514838	0.00906851	Significant
YER099C	PRS2	5-phospho-ribosyl-1(alpha)-pyrophosphate synthetase, synthesizes PRPP	-0.0702053	0.890077	Not-significant	0.514659	0.00250882	Significant
YMR167W	MLH1	Protein required for mismatch repair in mitosis and meiosis	0.0583994	0.909282	Not-significant	0.514163	0.000321053	Significant
YGR287C	IMA1	Major isomaltase (alpha-1,6-glucosidase/alpha-methylglucosidase)	0.591987	0.015791	Significant	0.513157	0.0212642	Significant
YDR346C	SVF1	Protein with a potential role in cell survival pathways	-0.0817197	0.859211	Not-significant	0.511112	0.000166436	Significant
YOR323C	PRO2	Gamma-glutamyl phosphate reductase	-0.189826	0.513806	Not-significant	0.511024	0.000487059	Significant
YDR026C	YDR026C	RNA polymerase I termination factor	-0.0847285	0.775186	Not-significant	0.510756	1.97596e-05	Significant
YJL039C	NUP192	Essential subunit of the inner ring of the nuclear pore complex (NPC)	-0.130158	0.809443	Not-significant	0.510424	0.014166	Significant
YOR208W	PTP2	Nuclear phosphotyrosine-specific phosphatase involved in osmosensing	0.304573	0.537648	Not-significant	0.510414	0.00956575	Significant
YOL066C	RIB2	Bifunctional DRAP deaminase tRNA:pseudouridine synthase	-0.112787	0.717305	Not-significant	0.510335	0.000485576	Significant
YGR154C	GTO1	Omega-class glutathione transferase	0.279481	0.435155	Not-significant	0.50998	0.0414439	Significant
YMR312W	ELP6	Subunit of hexameric RecA-like ATPase Elp456 Elongator subcomplex	-0.1148	0.790481	Not-significant	0.509972	0.00455738	Significant
YKL071W	YKL071W	Putative protein of unknown function	-0.0535839	0.950749	Not-significant	0.508355	0.0275345	Significant
YDR326C	YSP2	Protein involved in programmed cell death	-0.177763	0.744891	Not-significant	0.507637	0.0251422	Significant
YBL008W	HIR1	Subunit of the HIR complex	0.0225363	0.964365	Not-significant	0.507379	0.0005696	Significant
YMR214W	SCJ1	One of several homologs of bacterial chaperone DnaJ	-0.0377512	0.941366	Not-significant	0.50723	0.000820968	Significant
YOR115C	TRS33	Core component of transport protein particle (TRAPP) complexes I-III	-0.294807	0.251195	Not-significant	0.505709	0.00645164	Significant
YAL058W	CNE1	Calnexin	0.0358095	0.948944	Not-significant	0.505166	0.000794639	Significant
YJL129C	TRK1	Component of the Trk1p-Trk2p potassium transport system	-0.0521738	0.86925	Not-significant	0.504182	7.08662e-05	Significant
YJR064W	CCT5	Subunit of the cytosolic chaperonin Cct ring complex	-0.076534	0.774519	Not-significant	0.503826	1.08644e-08	Significant
YBR060C	ORC2	Subunit of the origin recognition complex (ORC)	-0.151313	0.428505	Not-significant	0.503332	1.14591e-05	Significant
YAR042W	SWH1	Protein similar to mammalian oxysterol-binding protein	0.197204	0.365752	Not-significant	0.50193	6.39756e-05	Significant
YGL121C	GPG1	Proposed gamma subunit of the heterotrimeric G protein	0.189713	0.398942	Not-significant	0.501635	0.000424403	Significant
YMR111C	YMR111C	Protein of unknown function	-0.0591838	0.912015	Not-significant	0.500696	0.00104001	Significant
YBR055C	PRP6	Splicing factor	-0.103897	0.702837	Not-significant	0.500409	5.51717e-05	Significant
YHR167W	THP2	Subunit of the THO and TREX complexes	-0.185275	0.640368	Not-significant	0.499619	0.0140641	Significant
YOL029C	YOL029C	Putative protein of unknown function	-0.184173	0.507001	Not-significant	0.499499	0.00102383	Significant
YKR091W	SRL3	GTB motif (G1/S transcription factor binding) containing protein	0.404349	0.307987	Not-significant	0.499486	0.0317658	Significant
YER114C	BOI2	Protein implicated in polar growth, functionally redundant with Boi1p	-0.0356933	0.932358	Not-significant	0.498931	1.19595e-06	Significant
YCR082W	AHC2	Component of the ADA histone acetyltransferase complex	-0.107464	0.579429	Not-significant	0.498464	1.01528e-08	Significant
YDL021W	GPM2	Homolog of Gpm1p phosphoglycerate mutase	0.208404	0.529514	Not-significant	0.496006	0.00196799	Significant
YGR056W	RSC1	Component of the RSC chromatin remodeling complex	-0.0384911	0.939099	Not-significant	0.495775	0.000152935	Significant
YOR143C	THI80	Thiamine pyrophosphokinase	-0.142737	0.725184	Not-significant	0.495121	0.00414333	Significant
YCR042C	TAF2	TFIID subunit (150 kDa)	-0.0633256	0.911399	Not-significant	0.494925	0.0131108	Significant
YDR143C	SAN1	Ubiquitin-protein ligase	-0.00259022	0.997024	Not-significant	0.49461	0.000400134	Significant
YNL311C	SKP2	F-box protein of unknown function	0.0944653	0.900351	Not-significant	0.493921	0.0291328	Significant
YHR036W	BRL1	Essential nuclear envelope integral membrane protein	-0.0438893	0.938602	Not-significant	0.49342	0.00127411	Significant
YIL134W	FLX1	Protein required for transport of flavin adenine dinucleotide (FAD)	0.018174	0.977003	Not-significant	0.491919	0.015884	Significant
YGL044C	RNA15	Component of the cleavage and polyadenylation factor I (CF I)	-0.135854	0.599322	Not-significant	0.489265	0.00026901	Significant
YJL061W	NUP82	Linker nucleoporin component of the nuclear pore complex (NPC)	0.0128921	0.982735	Not-significant	0.489235	0.0141419	Significant
YPL263C	KEL3	Cytoplasmic protein of unknown function	-0.414498	0.000642985	Significant	0.489125	6.03765e-07	Significant
YHL016C	DUR3	Plasma membrane transporter for both urea and polyamines	-0.338557	0.56931	Not-significant	0.488971	0.0471943	Significant
YOL130W	ALR1	Plasma membrane Mg(2+) transporter	-0.264367	0.219926	Not-significant	0.488238	0.00017037	Significant
YHR081W	LRP1	Nuclear exosome-associated nucleic acid binding protein	-0.275218	0.364246	Not-significant	0.488228	0.00633209	Significant
YGR089W	NNF2	Protein that exhibits physical and genetic interactions with Rpb8p	-0.0658314	0.910304	Not-significant	0.487785	0.0181497	Significant
YKL176C	LST4	Protein possibly involved in a post-Golgi secretory pathway	-0.195956	0.194026	Not-significant	0.48687	2.76485e-07	Significant
YOR307C	SLY41	Protein involved in ER-to-Golgi transport	-0.0492401	0.909282	Not-significant	0.485589	0.000930811	Significant
YJL179W	PFD1	Subunit of heterohexameric prefoldin	-0.0270709	0.957671	Not-significant	0.485363	0.000102713	Significant
YPL273W	SAM4	S-adenosylmethionine-homocysteine methyltransferase	-0.243051	0.18938	Not-significant	0.485141	6.0979e-05	Significant
YIL142W	CCT2	Subunit beta of the cytosolic chaperonin Cct ring complex	0.0365431	0.930289	Not-significant	0.483895	3.20395e-05	Significant
YLR083C	EMP70	Protein with a role in cellular adhesion and filamentous growth	-0.116871	0.711947	Not-significant	0.483635	0.00103432	Significant
YHR044C	DOG1	2-deoxyglucose-6-phosphate phosphatase	-0.374937	0.324362	Not-significant	0.483001	0.0443151	Significant
YDR541C	YDR541C	Aldehyde reductase	0.298409	0.372013	Not-significant	0.48296	0.0152189	Significant
YBR153W	RIB7	Diaminohydroxyphoshoribosylaminopyrimidine deaminase	-0.0374877	0.946015	Not-significant	0.482908	0.00091188	Significant
YEL037C	RAD23	Protein with ubiquitin-like N terminus	0.0651418	0.762324	Not-significant	0.48109	6.07817e-07	Significant
YKR048C	NAP1	Histone chaperone	-0.0867495	0.844594	Not-significant	0.480997	0.00293792	Significant
YPL177C	CUP9	Homeodomain-containing transcriptional repressor	-0.121812	0.677354	Not-significant	0.480809	1.00049e-05	Significant
YIL008W	URM1	Ubiquitin-like protein involved in thiolation of cytoplasmic tRNAs	-0.233586	0.508174	Not-significant	0.480792	0.00531275	Significant
YKL015W	PUT3	Transcriptional activator	0.0713157	0.915828	Not-significant	0.478529	0.0200208	Significant
YOL078W	AVO1	Component of a membrane-bound complex containing the Tor2p kinase	-0.132082	0.688522	Not-significant	0.477643	0.000720647	Significant
YGR240C	PFK1	Alpha subunit of heterooctameric phosphofructokinase	0.0857966	0.679445	Not-significant	0.47729	0.000295097	Significant
YNL029C	KTR5	Putative mannosyltransferase involved in protein glycosylation	-0.245165	0.214095	Not-significant	0.475205	0.000771952	Significant
YGR212W	SLI1	N-acetyltransferase	0.132312	0.721277	Not-significant	0.474787	0.00356558	Significant
YKL074C	MUD2	Protein involved in early pre-mRNA splicing	-0.0870918	0.776916	Not-significant	0.47451	1.28079e-05	Significant
YBR196C	PGI1	Glycolytic enzyme phosphoglucose isomerase	0.122701	0.654202	Not-significant	0.474179	0.00039737	Significant
YOR201C	MRM1	Ribose methyltransferase	-0.0771719	0.86307	Not-significant	0.473809	0.00075364	Significant
YGL150C	INO80	ATPase and nucleosome spacing factor	-0.139333	0.750459	Not-significant	0.471071	0.00449062	Significant
YOL027C	MDM38	Mitochondrial protein	-0.104787	0.673424	Not-significant	0.47086	0.000545353	Significant
YCR089W	FIG2	Cell wall adhesin, expressed specifically during mating	0.0393493	0.961224	Not-significant	0.470438	0.0275546	Significant
YER107C	GLE2	RNA export factor associated with the nuclear pore complex (NPC)	-0.053675	0.918961	Not-significant	0.4686	0.00418445	Significant
YHR151C	MTC6	Protein of unknown function	0.0813559	0.810091	Not-significant	0.467862	0.000385846	Significant
YDR325W	YCG1	Subunit of the condensin complex	-0.299831	0.0598494	Not-significant	0.467829	0.00286405	Significant
YPR049C	ATG11	Adapter protein for pexophagy and the Cvt targeting pathway	0.155596	0.731904	Not-significant	0.4678	0.0161059	Significant
YPR196W	YPR196W	Putative maltose-responsive transcription factor	-0.259659	0.32352	Not-significant	0.46743	0.00455475	Significant
YJR052W	RAD7	Nucleotide excision repair (NER) protein	0.210122	0.236734	Not-significant	0.466475	0.000372312	Significant
YNL325C	FIG4	Phosphatidylinositol 3,5-bisphosphate (PtdIns[3,5]P) phosphatase	-0.217159	0.601387	Not-significant	0.466031	0.0269742	Significant
YKL004W	AUR1	Phosphatidylinositol:ceramide phosphoinositol transferase	0.0457587	0.886222	Not-significant	0.465998	3.52859e-05	Significant
YOR060C	SLD7	Protein with a role in chromosomal DNA replication	0.0468943	0.9511	Not-significant	0.465423	0.00871723	Significant
YGL014W	PUF4	Member of the PUF protein family	0.0125122	0.981444	Not-significant	0.464613	0.00304349	Significant
YDR454C	GUK1	Guanylate kinase	-0.288892	0.250894	Not-significant	0.464143	0.00631076	Significant
YDR357C	CNL1	Subunit of the BLOC-1 complex involved in endosomal maturation	-0.056399	0.946722	Not-significant	0.463361	0.0431185	Significant
YIL001W	YIL001W	Putative protein of unknown function	-0.101862	0.787436	Not-significant	0.462822	0.00691457	Significant
YER089C	PTC2	Type 2C protein phosphatase (PP2C)	-0.0690392	0.891189	Not-significant	0.462788	0.00784839	Significant
YKL075C	YKL075C	Putative protein of unknown function	-0.0549537	0.900351	Not-significant	0.462653	0.000355084	Significant
YFL055W	AGP3	Low-affinity amino acid permease	0.417447	0.0886933	Not-significant	0.462451	0.0213955	Significant
YHL040C	ARN1	ARN family transporter for siderophore-iron chelates	-0.310437	0.153378	Not-significant	0.460573	0.00287547	Significant
YPR167C	MET16	3'-phosphoadenylsulfate reductase	0.0978265	0.862643	Not-significant	0.460396	0.0147017	Significant
YIL151C	YIL151C	hEST1A/B (SMG5/6)-like protein	0.00464291	0.995848	Not-significant	0.460114	0.0153713	Significant
YLR172C	DPH5	Methyltransferase required for synthesis of diphthamide	-0.0245053	0.971334	Not-significant	0.458772	0.0202574	Significant
YBR166C	TYR1	Prephenate dehydrogenase involved in tyrosine biosynthesis	-0.0832326	0.83546	Not-significant	0.458499	0.00118828	Significant
YJR042W	NUP85	Subunit of the Nup84p subcomplex of the nuclear pore complex (NPC)	-0.0816287	0.762235	Not-significant	0.458331	2.36045e-05	Significant
YOR349W	CIN1	Tubulin folding factor D involved in beta-tubulin (Tub2p) folding	0.0826312	0.850793	Not-significant	0.457117	0.00158484	Significant
YKL212W	SAC1	Phosphatidylinositol phosphate (PtdInsP) phosphatase	-0.16196	0.311838	Not-significant	0.456672	2.97162e-06	Significant
YMR207C	HFA1	Mitochondrial acetyl-coenzyme A carboxylase	-0.26854	0.140648	Not-significant	0.454561	0.000187299	Significant
YIL038C	NOT3	Subunit of CCR4-NOT global transcriptional regulator	0.00807849	0.985985	Not-significant	0.454418	0.000419709	Significant
YOR133W	EFT1	Elongation factor 2 (EF-2), also encoded by EFT2	-0.189951	0.642268	Not-significant	0.45389	0.0190951	Significant
YML094W	GIM5	Subunit of the heterohexameric cochaperone prefoldin complex	0.0278649	0.971156	Not-significant	0.452987	0.043134	Significant
YJL127C	SPT10	Putative histone acetylase with a role in transcriptional silencing	0.0122034	0.985427	Not-significant	0.45123	0.00287547	Significant
YNL042W	BOP3	Protein of unknown function	-0.143822	0.622156	Not-significant	0.450294	0.0151061	Significant
YBR063C	YBR063C	Putative protein of unknown function	0.133805	0.779066	Not-significant	0.449641	0.0246056	Significant
YER172C	BRR2	RNA-dependent ATPase RNA helicase (DEIH box)	-0.0728152	0.91846	Not-significant	0.449274	0.0298046	Significant
YKR019C	IRS4	EH domain-containing protein	-0.0888398	0.862643	Not-significant	0.448951	0.00697066	Significant
YHR187W	IKI1	Subunit of hexameric RecA-like ATPase Elp456 Elongator subcomplex	-0.0343008	0.940564	Not-significant	0.448912	0.000447171	Significant
YOL101C	IZH4	Membrane protein involved in zinc ion homeostasis	-0.131736	0.809499	Not-significant	0.447723	0.0150723	Significant
YGR124W	ASN2	Asparagine synthetase	-0.0969844	0.784292	Not-significant	0.447163	0.00241749	Significant
YDR138W	HPR1	Subunit of THO/TREX complexes	-0.0943935	0.854353	Not-significant	0.446616	0.0110879	Significant
YDL116W	NUP84	Subunit of the Nup84p subcomplex of the nuclear pore complex (NPC)	-0.101311	0.809499	Not-significant	0.445815	0.0204137	Significant
YGL124C	MON1	Subunit of a heterodimeric guanine nucleotide exchange factor (GEF)	0.0741583	0.86925	Not-significant	0.444834	0.00318214	Significant
YOR048C	RAT1	Nuclear 5' to 3' single-stranded RNA exonuclease	-0.0193207	0.962099	Not-significant	0.444506	8.12314e-06	Significant
YDR190C	RVB1	ATP-dependent DNA helicase, also known as pontin	-0.0271609	0.943125	Not-significant	0.443616	2.50511e-05	Significant
YNR039C	ZRG17	Endoplasmic reticulum zinc transporter	-0.0471619	0.939732	Not-significant	0.441519	0.00476314	Significant
YLR372W	SUR4	Elongase	-0.164739	0.603735	Not-significant	0.441306	0.0431107	Significant
YBL088C	TEL1	Protein kinase primarily involved in telomere length regulation	-0.0785918	0.899983	Not-significant	0.441186	0.0196164	Significant
YOR213C	SAS5	Subunit of the SAS complex (Sas2p, Sas4p, Sas5p)	-0.124432	0.693194	Not-significant	0.440814	0.000879734	Significant
YNR011C	PRP2	RNA-dependent DExD/H-box ATPase	-0.0975114	0.750608	Not-significant	0.440682	0.000513976	Significant
YDR359C	EAF1	Component of the NuA4 histone acetyltransferase complex	-0.135866	0.616788	Not-significant	0.440056	3.79234e-05	Significant
YBL067C	UBP13	Ubiquitin-specific protease that cleaves Ub-protein fusions	-0.149427	0.604628	Not-significant	0.439934	0.00248753	Significant
YLR146W-A	YLR146W-A	Putative protein of unknown function	-0.116805	0.863626	Not-significant	0.439351	0.0292435	Significant
YML077W	BET5	Core component of transport protein particle (TRAPP) complexes I-III	-0.134929	0.78376	Not-significant	0.439251	0.0393975	Significant
YPL169C	MEX67	Poly(A)RNA binding protein involved in nuclear mRNA export	0.0262238	0.948982	Not-significant	0.439084	0.000495764	Significant
YDL179W	PCL9	Cyclin	0.317474	0.0584192	Not-significant	0.438947	0.00832634	Significant
YPL243W	SRP68	Core component of the signal recognition particle (SRP) complex	-0.0728887	0.775019	Not-significant	0.438637	0.000107266	Significant
YBL104C	SEA4	Subunit of the SEA (Seh1-associated) complex	-0.171784	0.560479	Not-significant	0.438286	0.0017323	Significant
YPR070W	MED1	Subunit of the RNA polymerase II mediator complex	-0.107152	0.843316	Not-significant	0.438179	0.0314669	Significant
YOL011W	PLB3	Phospholipase B (lysophospholipase) involved in lipid metabolism	0.0200982	0.961157	Not-significant	0.43707	0.000123156	Significant
YHR102W	KIC1	Protein kinase of the PAK/Ste20 family, required for cell integrity	0.15084	0.61794	Not-significant	0.436803	0.00478	Significant
YPR086W	SUA7	Transcription factor TFIIB	0.00718408	0.991489	Not-significant	0.43668	0.0103017	Significant
YDR373W	FRQ1	N-myristoylated calcium-binding protein	-0.169455	0.628486	Not-significant	0.435913	0.0145372	Significant
YNL244C	SUI1	Translation initiation factor eIF1	-0.185727	0.573275	Not-significant	0.435797	0.00792942	Significant
YIR031C	DAL7	Malate synthase	-0.0626924	0.877444	Not-significant	0.435425	0.00121029	Significant
YKR062W	TFA2	TFIIE small subunit	-0.0681676	0.86839	Not-significant	0.434835	0.00260672	Significant
YDR334W	SWR1	Swi2/Snf2-related ATPase	0.0442286	0.946265	Not-significant	0.434579	0.00917403	Significant
YPL210C	SRP72	Core component of the signal recognition particle (SRP)	-0.104434	0.770444	Not-significant	0.434046	0.000698459	Significant
YEL019C	MMS21	SUMO ligase and component of the SMC5-SMC6 complex	0.0296908	0.97021	Not-significant	0.433289	0.0383092	Significant
YHR201C	PPX1	Exopolyphosphatase	-0.0478228	0.878171	Not-significant	0.432611	0.00069604	Significant
YGR014W	MSB2	Mucin family member involved in various signaling pathways	-0.0750016	0.895	Not-significant	0.432399	0.0151801	Significant
YMR285C	NGL2	Protein involved in 5.8S rRNA processing	-0.147818	0.580968	Not-significant	0.432196	0.00025107	Significant
YOR052C	YOR052C	AN1-type zinc finger protein of unknown function	0.602151	3.08128e-05	Significant	0.431728	0.00227768	Significant
YIL074C	SER33	3-phosphoglycerate dehydrogenase	0.0746213	0.859685	Not-significant	0.430716	2.91392e-05	Significant
YGL113W	SLD3	Protein involved in the initiation of DNA replication	-0.0558181	0.877871	Not-significant	0.430588	0.000142017	Significant
YKL010C	UFD4	Ubiquitin-protein ligase (E3)	0.0364051	0.939419	Not-significant	0.430173	0.000587119	Significant
YGR254W	ENO1	Enolase I, a phosphopyruvate hydratase	0.369944	0.0351526	Significant	0.430057	0.00653055	Significant
YLR018C	POM34	Subunit of the transmembrane ring of the nuclear pore complex (NPC)	-0.121075	0.787744	Not-significant	0.429079	0.0181323	Significant
YJL156C	SSY5	Serine protease of SPS plasma membrane amino acid sensor system	-0.0069158	0.991489	Not-significant	0.42875	0.00579388	Significant
YPL175W	SPT14	UDP-glycosyltransferase subunit of the GPI-GnT complex	0.0207178	0.962099	Not-significant	0.428123	0.000453654	Significant
YOL138C	RTC1	Subunit of the SEA (Seh1-associated) complex	-0.179704	0.372932	Not-significant	0.42744	0.00060361	Significant
YNL103W	MET4	Leucine-zipper transcriptional activator	0.0350139	0.924119	Not-significant	0.427409	3.32836e-05	Significant
YCR028C	FEN2	Plasma membrane H+-pantothenate symporter	-0.0634111	0.868229	Not-significant	0.426112	0.000224227	Significant
YKL128C	PMU1	Putative phosphomutase	-0.272748	0.201309	Not-significant	0.425989	0.00273968	Significant
YDR240C	SNU56	Component of U1 snRNP required for mRNA splicing via spliceosome	-0.148302	0.688522	Not-significant	0.425826	0.00869526	Significant
YKL166C	TPK3	cAMP-dependent protein kinase catalytic subunit	-0.182334	0.389393	Not-significant	0.425686	0.000687471	Significant
YHR186C	KOG1	Subunit of TORC1	-0.019618	0.972838	Not-significant	0.425158	0.00585991	Significant
YGL251C	HFM1	Meiosis specific DNA helicase	-0.153632	0.723023	Not-significant	0.424862	0.00843962	Significant
YER081W	SER3	3-phosphoglycerate dehydrogenase	0.228911	0.328327	Not-significant	0.424843	0.00422959	Significant
YLR410W	VIP1	Inositol hexakisphosphate and inositol heptakisphosphate kinase	-0.00380615	0.993804	Not-significant	0.424352	0.00074265	Significant
YHR122W	YHR122W	Component of cytosolic iron-sulfur protein assembly (CIA) machinery	-0.0698243	0.88597	Not-significant	0.424025	0.00994059	Significant
YIL030C	SSM4	Ubiquitin-protein ligase involved in ER-associated protein degradation	0.0814362	0.891189	Not-significant	0.422882	0.0334675	Significant
YNL032W	SIW14	Tyrosine phosphatase involved in actin organization and endocytosis	-0.102449	0.769137	Not-significant	0.422103	0.00460946	Significant
YLR300W	EXG1	Major exo-1,3-beta-glucanase of the cell wall	0.296876	0.0201082	Significant	0.421749	0.000889343	Significant
YEL062W	NPR2	Subunit of SEA (Seh1-associated), Npr2/3, and Iml1p complexes	0.253897	0.330027	Not-significant	0.421054	0.00293919	Significant
YDL160C	DHH1	Cytoplasmic DExD/H-box helicase, stimulates mRNA decapping	-0.0736367	0.887864	Not-significant	0.419767	0.0231192	Significant
YPR193C	HPA2	Tetrameric histone acetyltransferase	-0.148427	0.770954	Not-significant	0.419135	0.0152027	Significant
YPL101W	ELP4	Subunit of hexameric RecA-like ATPase Elp456 Elongator subcomplex	-0.085619	0.796791	Not-significant	0.41795	0.00325257	Significant
YDL203C	ACK1	Protein that functions in the cell wall integrity pathway	-0.0793631	0.821207	Not-significant	0.417708	0.00120374	Significant
YLR144C	ACF2	Intracellular beta-1,3-endoglucanase	0.033103	0.953866	Not-significant	0.417607	0.0150823	Significant
YPL105C	SYH1	Protein of unknown function that influences nuclear pore distribution	-0.0789409	0.7571	Not-significant	0.417125	2.54124e-05	Significant
YDL013W	SLX5	Subunit of the Slx5-Slx8 SUMO-targeted ubiquitin ligase (STUbL) compl	0.0216947	0.963337	Not-significant	0.415901	0.00220319	Significant
YDL109C	YDL109C	Putative lipase	-0.0193697	0.971564	Not-significant	0.415431	0.0144919	Significant
YML107C	PML39	Protein required for nuclear retention of unspliced pre-mRNAs	-0.342123	0.22548	Not-significant	0.415217	0.0243155	Significant
YDR062W	LCB2	Component of serine palmitoyltransferase	-0.20094	0.136124	Not-significant	0.414971	0.000208962	Significant
YMR043W	MCM1	Transcription factor	-0.0211869	0.964478	Not-significant	0.414921	0.00823723	Significant
YER013W	PRP22	DEAH-box RNA-dependent ATPase/ATP-dependent RNA helicase	-0.105197	0.828928	Not-significant	0.414673	0.0189501	Significant
YCL035C	GRX1	Glutathione-dependent disulfide oxidoreductase	0.399192	0.195971	Not-significant	0.414526	0.0430851	Significant
YML071C	COG8	Component of the conserved oligomeric Golgi complex	0.070206	0.826691	Not-significant	0.414351	0.000454765	Significant
YOL139C	CDC33	mRNA cap binding protein and translation initiation factor eIF4E	-0.138727	0.660749	Not-significant	0.413028	0.00660664	Significant
YMR176W	ECM5	Subunit of the Snt2C complex	-0.155849	0.77236	Not-significant	0.412597	0.0331475	Significant
YOR079C	ATX2	Golgi membrane protein involved in manganese homeostasis	-0.0397978	0.950778	Not-significant	0.411225	0.00957286	Significant
YOL094C	RFC4	Subunit of heteropentameric Replication factor C (RF-C)	0.0547616	0.909047	Not-significant	0.410635	0.00497547	Significant
YMR266W	RSN1	Membrane protein of unknown function	0.0355301	0.933949	Not-significant	0.410493	0.00206495	Significant
YDR207C	UME6	Rpd3L histone deacetylase complex subunit	-0.033501	0.948944	Not-significant	0.408305	0.00519947	Significant
YIL046W	MET30	F-box protein containing five copies of the WD40 motif	0.0947926	0.729914	Not-significant	0.408237	0.000728343	Significant
YCR036W	RBK1	Putative ribokinase	-0.0428318	0.921377	Not-significant	0.407958	0.000811801	Significant
YGL105W	ARC1	Protein that binds tRNA and methionyl- and glutamyl-tRNA synthetases	-0.0940065	0.715985	Not-significant	0.407947	0.000858846	Significant
YPL075W	GCR1	Transcriptional activator of genes involved in glycolysis	-0.129387	0.717305	Not-significant	0.407943	0.00334766	Significant
YEL042W	GDA1	Guanosine diphosphatase located in the Golgi	-0.0374447	0.940564	Not-significant	0.405337	0.00127281	Significant
YKL198C	PTK1	Putative serine/threonine protein kinase	0.154048	0.707228	Not-significant	0.405285	0.0454715	Significant
YOR151C	RPB2	RNA polymerase II second largest subunit B150	0.0163216	0.97248	Not-significant	0.404978	0.00508425	Significant
YLR412W	BER1	Protein involved in microtubule-related processes	0.0238469	0.962664	Not-significant	0.404766	0.000920071	Significant
YDL074C	BRE1	E3 ubiquitin ligase	-0.117149	0.796217	Not-significant	0.404588	0.0312461	Significant
YHR156C	LIN1	Non-essential component of U5 snRNP	0.23006	0.516442	Not-significant	0.40404	0.0488756	Significant
YOR236W	DFR1	Dihydrofolate reductase involved in tetrahydrofolate biosynthesis	-0.460818	0.0524874	Not-significant	0.40356	0.0374244	Significant
YJL035C	TAD2	Subunit of tRNA-specific adenosine-34 deaminase	-0.464141	0.0858	Not-significant	0.402938	0.0293543	Significant
YAR014C	BUD14	Protein involved in bud-site selection	-0.0215742	0.963393	Not-significant	0.401965	0.00463371	Significant
YBR022W	POA1	Phosphatase that is highly specific for ADP-ribose 1''-phosphate	-0.118397	0.769137	Not-significant	0.401648	0.0118732	Significant
YDL217C	TIM22	Essential core component of the mitochondrial TIM22 complex	-0.0363913	0.946036	Not-significant	0.401478	0.00648333	Significant
YNL076W	MKS1	Pleiotropic negative transcriptional regulator	-0.0504102	0.877871	Not-significant	0.401176	0.000187626	Significant
YER007C-A	TMA20	Protein of unknown function that associates with ribosomes	-0.192388	0.333971	Not-significant	0.401063	0.015114	Significant
YGL136C	MRM2	Mitochondrial 2' O-ribose methyltransferase	-0.0509357	0.925486	Not-significant	0.400403	0.0030248	Significant
YER159C	BUR6	Subunit of a heterodimeric NC2 transcription regulator complex	0.0594495	0.894334	Not-significant	0.400014	0.00699489	Significant
YDR422C	SIP1	Alternate beta-subunit of the Snf1p kinase complex	0.0774461	0.824004	Not-significant	0.399883	0.00411277	Significant
YBR065C	ECM2	Pre-mRNA splicing factor	0.303639	0.156557	Not-significant	0.399168	0.0266434	Significant
YDR049W	VMS1	Component of a Cdc48p-complex involved in protein quality control	0.00749668	0.985227	Not-significant	0.399124	0.000105714	Significant
YKR075C	YKR075C	Protein of unknown function	0.285394	0.205822	Not-significant	0.398991	0.00140414	Significant
YML075C	HMG1	HMG-CoA reductase	0.0155605	0.986334	Not-significant	0.398648	0.037713	Significant
YOL028C	YAP7	Putative basic leucine zipper (bZIP) transcription factor	-0.0175233	0.971645	Not-significant	0.398412	0.00427687	Significant
YMR307W	GAS1	Beta-1,3-glucanosyltransferase	-0.168448	0.332568	Not-significant	0.39732	0.000113511	Significant
YLR146C	SPE4	Spermine synthase	0.0726336	0.850173	Not-significant	0.397157	0.00163355	Significant
YPR008W	HAA1	Transcriptional activator involved in adaptation to weak acid stress	-0.141095	0.392091	Not-significant	0.397123	9.50609e-05	Significant
YNR048W	YNR048W	Potential noncatalytic subunit for phospholipid translocase Dnf3p	-0.0921757	0.818072	Not-significant	0.396108	0.00875705	Significant
YLR405W	DUS4	Dihydrouridine synthase	-0.121774	0.688522	Not-significant	0.395831	0.00230712	Significant
YOR127W	RGA1	GTPase-activating protein for polarity-establishment protein Cdc42p	0.106015	0.780146	Not-significant	0.395514	0.0143508	Significant
YMR130W	YMR130W	Putative protein of unknown function	-0.0782291	0.863626	Not-significant	0.395128	0.0107527	Significant
YLR179C	YLR179C	Protein of unknown function with similarity to Tfs1p	0.142958	0.711947	Not-significant	0.395104	0.0107654	Significant
YMR277W	FCP1	Carboxy-terminal domain (CTD) phosphatase	-0.217455	0.247424	Not-significant	0.393946	0.00146526	Significant
YPL049C	DIG1	MAP kinase-responsive inhibitor of the Ste12p transcription factor	0.0777804	0.812036	Not-significant	0.39325	0.00423976	Significant
YKL133C	YKL133C	Putative protein of unknown function	0.20128	0.469016	Not-significant	0.393157	0.00805011	Significant
YNL199C	GCR2	Transcriptional activator of genes involved in glycolysis	-0.0791341	0.809499	Not-significant	0.392036	0.00109327	Significant
YML060W	OGG1	Nuclear and mitochondrial glycosylase/lyase	0.00506506	0.994234	Not-significant	0.390124	0.011571	Significant
YDR243C	PRP28	RNA binding protein	-0.0283935	0.959733	Not-significant	0.390005	0.00495408	Significant
YGR041W	BUD9	Protein involved in bud-site selection	0.166706	0.573275	Not-significant	0.389616	0.0146246	Significant
YJL174W	KRE9	Glycoprotein involved in cell wall beta-glucan assembly	-0.0463544	0.923713	Not-significant	0.389273	0.00499411	Significant
YPR131C	NAT3	Catalytic subunit of the NatB N-terminal acetyltransferase	-0.0446286	0.940564	Not-significant	0.389192	0.0189299	Significant
YJR014W	TMA22	Protein of unknown function	-0.0190116	0.971334	Not-significant	0.389049	0.0161117	Significant
YGR210C	YGR210C	Putative protein of unknown function	-0.127216	0.732326	Not-significant	0.389044	0.0185995	Significant
YGR134W	CAF130	Subunit of the CCR4-NOT transcriptional regulatory complex	-0.229928	0.4418	Not-significant	0.388831	0.0272937	Significant
YHR164C	DNA2	Tripartite DNA replication factor	0.0496851	0.913509	Not-significant	0.388761	0.00510946	Significant
YOL054W	PSH1	E3 ubiquitin ligase targeting centromere-binding protein Cse4p	0.0014496	0.997596	Not-significant	0.388615	0.00650421	Significant
YBL016W	FUS3	Mitogen-activated serine/threonine protein kinase involved in mating	0.0592588	0.900351	Not-significant	0.386092	0.0123907	Significant
YJR024C	MDE1	5'-methylthioribulose-1-phosphate dehydratase	-0.246457	0.441695	Not-significant	0.386087	0.0390678	Significant
YBR281C	DUG2	Component of glutamine amidotransferase (GATase II)	0.123155	0.717305	Not-significant	0.385964	0.0238989	Significant
YJL197W	UBP12	Ubiquitin-specific protease	-0.200633	0.299382	Not-significant	0.38569	0.00564276	Significant
YLR277C	YSH1	Putative endoribonuclease	-0.23696	0.214056	Not-significant	0.385359	0.00634242	Significant
YMR288W	HSH155	U2-snRNP associated splicing factor	-0.198175	0.413272	Not-significant	0.385264	0.0026887	Significant
YIL115C	NUP159	FG-nucleoporin component of central core of the nuclear pore complex	-0.199861	0.337735	Not-significant	0.383432	0.00187589	Significant
YOL075C	YOL075C	Putative ABC transporter	0.0923722	0.844594	Not-significant	0.383194	0.0182262	Significant
YOR346W	REV1	Deoxycytidyl transferase	-0.0882576	0.792483	Not-significant	0.381967	0.00116791	Significant
YPL188W	POS5	Mitochondrial NADH kinase	0.210669	0.293106	Not-significant	0.381691	0.0037371	Significant
YGR091W	PRP31	Splicing factor	0.0561219	0.891189	Not-significant	0.381661	0.0268857	Significant
YPR109W	YPR109W	Predicted membrane protein	-0.203127	0.530076	Not-significant	0.381424	0.0199564	Significant
YHR133C	NSG1	Protein involved in regulation of sterol biosynthesis	-0.109639	0.688522	Not-significant	0.381158	0.00157449	Significant
YFR002W	NIC96	Linker nucleoporin component of the nuclear pore complex (NPC)	-0.159922	0.658965	Not-significant	0.380508	0.047145	Significant
YPL001W	HAT1	Catalytic subunit of the Hat1p-Hat2p histone acetyltransferase complex	0.0244798	0.97021	Not-significant	0.380068	0.0229567	Significant
YOL137W	BSC6	Protein of unknown function with 8 putative transmembrane segments	-0.360195	0.0567539	Not-significant	0.379761	0.0247097	Significant
YGR169C-A	YGR169C-A	Putative protein of unknown function	-0.00162635	0.997596	Not-significant	0.379718	0.0144409	Significant
YCR090C	YCR090C	Putative protein of unknown function	-0.182559	0.446441	Not-significant	0.378079	0.00500335	Significant
YOR162C	YRR1	Zn2-Cys6 zinc-finger transcription factor	0.0123662	0.981419	Not-significant	0.377847	0.00646527	Significant
YNL024C-A	KSH1	Essential protein suggested to function early in the secretory pathway	-0.226647	0.528189	Not-significant	0.377425	0.0395806	Significant
YER176W	ECM32	DNA dependent ATPase/DNA helicase	-0.0288352	0.943125	Not-significant	0.376357	0.000100155	Significant
YOR353C	SOG2	Key component of the RAM signaling network	0.0714017	0.799695	Not-significant	0.375504	0.000116936	Significant
YGR292W	MAL12	Maltase (alpha-D-glucosidase)	0.0529245	0.890089	Not-significant	0.37477	0.00730018	Significant
YJL162C	JJJ2	Protein of unknown function	-0.0846566	0.883507	Not-significant	0.374602	0.0314741	Significant
YMR153W	NUP53	FG-nucleoporin component of central core of nuclear pore complex (NPC)	0.123876	0.622156	Not-significant	0.374087	0.00130049	Significant
YDL138W	RGT2	Plasma membrane high glucose sensor that regulates glucose transport	0.200695	0.554162	Not-significant	0.373666	0.0210073	Significant
YKL155C	RSM22	Mitochondrial ribosomal protein of the small subunit	0.0434319	0.89746	Not-significant	0.373223	0.00071436	Significant
YOR077W	RTS2	Basic zinc-finger protein	0.0476667	0.940564	Not-significant	0.372998	0.0396439	Significant
YML008C	ERG6	Delta(24)-sterol C-methyltransferase	0.011328	0.975795	Not-significant	0.372405	0.000529544	Significant
YGL186C	TPN1	Plasma membrane pyridoxine (vitamin B6) transporter	-0.00203118	0.997024	Not-significant	0.370582	0.00070618	Significant
YML049C	RSE1	Protein involved in pre-mRNA splicing	0.0246591	0.963393	Not-significant	0.36976	0.00517368	Significant
YDR151C	CTH1	Member of the CCCH zinc finger family	-0.170886	0.497327	Not-significant	0.369338	0.00959319	Significant
YPL068C	YPL068C	Protein of unknown function	-0.00184204	0.997596	Not-significant	0.369036	0.0140858	Significant
YDR104C	SPO71	Meiosis-specific protein required for spore wall formation	0.159549	0.655178	Not-significant	0.367473	0.0101548	Significant
YJL138C	TIF2	Translation initiation factor eIF4A	0.0269985	0.955097	Not-significant	0.367462	0.00445384	Significant
YEL032W	MCM3	Protein involved in DNA replication	0.000136222	0.999912	Not-significant	0.367238	0.0182947	Significant
YNL229C	URE2	Nitrogen catabolite repression transcriptional regulator	-0.232687	0.0877432	Not-significant	0.366279	0.000104726	Significant
YHR024C	MAS2	Alpha subunit of the mitochondrial processing protease (MPP)	0.0583426	0.86839	Not-significant	0.365232	0.0091971	Significant
YPR022C	YPR022C	Putative transcription factor, as suggested by computational analysis	-0.152663	0.582506	Not-significant	0.364887	0.00843382	Significant
YAL015C	NTG1	DNA N-glycosylase and apurinic/apyrimidinic (AP) lyase	-0.127827	0.793614	Not-significant	0.364665	0.0488756	Significant
YDR300C	PRO1	Gamma-glutamyl kinase	-0.180546	0.261836	Not-significant	0.364346	0.00219541	Significant
YDR393W	SHE9	Protein required for normal mitochondrial morphology	-0.173931	0.447103	Not-significant	0.363573	0.00590325	Significant
YLR192C	HCR1	eIF3j component of translation initiation factor 3 (eIF3)	-0.0683176	0.86492	Not-significant	0.36125	0.0118957	Significant
YJL014W	CCT3	Subunit of the cytosolic chaperonin Cct ring complex	-0.0680257	0.821207	Not-significant	0.361232	0.00141287	Significant
YFL036W	RPO41	Mitochondrial RNA polymerase	0.0290837	0.948944	Not-significant	0.360514	0.0220917	Significant
YNL004W	HRB1	Poly(A+) RNA-binding protein	-0.0697063	0.837813	Not-significant	0.360341	0.00100424	Significant
YDL036C	PUS9	Mitochondrial tRNA:pseudouridine synthase	-0.261064	0.472833	Not-significant	0.359376	0.049511	Significant
YLR443W	ECM7	Putative integral membrane protein with a role in calcium uptake	-0.0515555	0.882757	Not-significant	0.358623	0.00154001	Significant
YEL071W	DLD3	D-lactate dehydrogenase	0.337957	0.00126463	Significant	0.35849	0.00603658	Significant
YML124C	TUB3	Alpha-tubulin	-0.316293	0.0534247	Not-significant	0.358484	0.00555151	Significant
YHR165C	PRP8	Component of U4/U6-U5 snRNP complex	-0.0680501	0.882796	Not-significant	0.35844	0.00917403	Significant
YIR004W	DJP1	Cytosolic J-domain-containing protein	-0.0341344	0.922255	Not-significant	0.357127	0.000135817	Significant
YLR301W	HRI1	Protein of unknown function that interacts with Sec72p and Hrr25p	-0.254607	0.257165	Not-significant	0.356215	0.0148272	Significant
YBR263W	SHM1	Mitochondrial serine hydroxymethyltransferase	-0.200322	0.486938	Not-significant	0.35317	0.0315772	Significant
YIL003W	CFD1	Highly conserved iron-sulfur cluster binding protein	0.0114397	0.983072	Not-significant	0.352978	0.0176505	Significant
YIL021W	RPB3	RNA polymerase II third largest subunit B44	-0.0960781	0.762235	Not-significant	0.352231	0.0131266	Significant
YMR186W	HSC82	Cytoplasmic chaperone of the Hsp90 family	0.392452	0.147889	Not-significant	0.349922	0.032512	Significant
YDR194C	MSS116	Mitochondrial transcription elongation factor	-0.0707291	0.850367	Not-significant	0.349866	0.0102476	Significant
YGL043W	DST1	General transcription elongation factor TFIIS	0.0410025	0.940564	Not-significant	0.347448	0.0310333	Significant
YER041W	YEN1	Holliday junction resolvase	0.0687471	0.859585	Not-significant	0.347263	0.00215631	Significant
YNL154C	YCK2	Palmitoylated plasma membrane-bound casein kinase I (CK1) isoform	-0.160641	0.174938	Not-significant	0.347131	0.000233475	Significant
YFR029W	PTR3	Component of the SPS plasma membrane amino acid sensor system	0.145586	0.660749	Not-significant	0.346607	0.00993256	Significant
YMR166C	YMR166C	Transporter of the mitochondrial inner membrane that exports magnesium	0.0441191	0.930629	Not-significant	0.345231	0.0260468	Significant
YHR143W	DSE2	Daughter cell-specific secreted protein with similarity to glucanases	0.735481	5.75452e-13	Significant	0.344552	0.00118834	Significant
YDR017C	KCS1	Inositol hexakisphosphate and inositol heptakisphosphate kinase	-0.0636786	0.877323	Not-significant	0.341739	0.00802047	Significant
YOR061W	CKA2	Alpha' catalytic subunit of casein kinase 2 (CK2)	-0.0649718	0.84352	Not-significant	0.340549	0.000636202	Significant
YKL173W	SNU114	GTPase component of U5 snRNP involved in mRNA splicing via spliceosome	-0.0813073	0.809499	Not-significant	0.340537	0.0130508	Significant
YGR072W	UPF3	Component of the nonsense-mediated mRNA decay (NMD) pathway	-0.0618442	0.865711	Not-significant	0.339578	0.0231192	Significant
YPL071C	YPL071C	Putative protein of unknown function	-0.0876636	0.840349	Not-significant	0.33952	0.0256644	Significant
YBL098W	BNA4	Kynurenine 3-monooxygenase	-0.757334	2.44929e-07	Significant	0.338394	0.014542	Significant
YLR215C	CDC123	Protein involved in nutritional control of the cell cycle	-0.085305	0.815899	Not-significant	0.336003	0.0172963	Significant
YHR079C	IRE1	Serine-threonine kinase and endoribonuclease	-0.0730305	0.862643	Not-significant	0.335467	0.0342669	Significant
YJR089W	BIR1	Subunit of chromosomal passenger complex (CPC)	-0.084236	0.852607	Not-significant	0.335182	0.0187686	Significant
YOL062C	APM4	Cargo-binding mu subunit of AP-2	-0.253283	0.246942	Not-significant	0.33404	0.0191772	Significant
YIL022W	TIM44	Essential component of the TIM23 complex	-0.225223	0.337691	Not-significant	0.332896	0.0425397	Significant
YLR387C	REH1	Cytoplasmic 60S subunit biogenesis factor	0.226817	0.282064	Not-significant	0.33223	0.0119867	Significant
YEL058W	PCM1	Essential N-acetylglucosamine-phosphate mutase	0.0616252	0.876962	Not-significant	0.329895	0.00499411	Significant
YML015C	TAF11	TFIID subunit (40 kDa)	-0.10898	0.688522	Not-significant	0.329025	0.0161117	Significant
YDR483W	KRE2	Alpha1,2-mannosyltransferase of the Golgi	-0.077537	0.811973	Not-significant	0.327948	0.00563704	Significant
YNL125C	ESBP6	Protein with similarity to monocarboxylate permeases	-0.249863	0.0348453	Significant	0.327309	0.000452147	Significant
YHR013C	ARD1	Subunit of protein N-terminal acetyltransferase NatA	-0.166108	0.622117	Not-significant	0.327251	0.0457038	Significant
YJR009C	TDH2	Glyceraldehyde-3-phosphate dehydrogenase (GAPDH), isozyme 2	-0.210141	0.4418	Not-significant	0.322894	0.0472421	Significant
YGR204W	ADE3	Cytoplasmic trifunctional enzyme C1-tetrahydrofolate synthase	0.10692	0.689312	Not-significant	0.32198	0.0396053	Significant
YBR058C	UBP14	Ubiquitin-specific protease	-0.0256103	0.946265	Not-significant	0.321644	0.0013286	Significant
YLL020C	YLL020C	Dubious open reading frame	-0.4088	0.0287562	Significant	0.32032	0.029035	Significant
YML065W	ORC1	Largest subunit of the origin recognition complex	-0.161079	0.571378	Not-significant	0.320163	0.0159026	Significant
YNL275W	BOR1	Boron efflux transporter of the plasma membrane	-0.0467706	0.941366	Not-significant	0.318934	0.0368571	Significant
YOL033W	MSE1	Mitochondrial glutamyl-tRNA synthetase	-0.102257	0.768441	Not-significant	0.318833	0.0183802	Significant
YKL114C	APN1	Major apurinic/apyrimidinic endonuclease	0.080288	0.788346	Not-significant	0.318652	0.00366413	Significant
YOL036W	YOL036W	Protein of unknown function	0.0873919	0.78057	Not-significant	0.318045	0.00839137	Significant
YAR002W	NUP60	FG-nucleoporin component of central core of the nuclear pore complex	0.175605	0.380665	Not-significant	0.317278	0.00353865	Significant
YBR283C	SSH1	Subunit of the Ssh1 translocon complex	-0.13375	0.605071	Not-significant	0.317074	0.0394811	Significant
YLL051C	FRE6	Putative ferric reductase with similarity to Fre2p	-0.00230087	0.997024	Not-significant	0.31688	0.0196047	Significant
YNL256W	FOL1	Multifunctional enzyme of the folic acid biosynthesis pathway	-0.0255266	0.958303	Not-significant	0.316283	0.0220751	Significant
YLR200W	YKE2	Subunit of the heterohexameric Gim/prefoldin protein complex	0.0458819	0.928125	Not-significant	0.316278	0.0293309	Significant
YPR032W	SRO7	Effector of Rab GTPase Sec4p	0.123989	0.732155	Not-significant	0.31585	0.0298064	Significant
YNR029C	YNR029C	Putative protein of unknown function	0.0214784	0.969125	Not-significant	0.314937	0.0342988	Significant
YPL023C	MET12	Protein with MTHFR activity in vitro	-0.00269416	0.996422	Not-significant	0.314167	0.00608801	Significant
YER173W	RAD24	Checkpoint protein	-0.0967199	0.82439	Not-significant	0.313695	0.024847	Significant
YER148W	SPT15	TATA-binding protein (TBP)	-0.213157	0.285886	Not-significant	0.312326	0.00311099	Significant
YPL235W	RVB2	ATP-dependent DNA helicase, also known as reptin	-0.158375	0.365752	Not-significant	0.311093	0.00276574	Significant
YHR120W	MSH1	DNA-binding protein of the mitochondria	-0.0501694	0.891515	Not-significant	0.310414	0.0417065	Significant
YOR280C	FSH3	Putative serine hydrolase	-0.292293	0.20565	Not-significant	0.307275	0.0446213	Significant
YOL105C	WSC3	Sensor-transducer of the stress-activated PKC1-MPK1 signaling pathway	0.197362	0.333608	Not-significant	0.307194	0.04848	Significant
YML112W	CTK3	Gamma subunit of C-terminal domain kinase I	0.10764	0.762126	Not-significant	0.306925	0.0450867	Significant
YEL015W	EDC3	Non-essential conserved protein with a role in mRNA decapping	-0.0600639	0.859211	Not-significant	0.305877	0.0026887	Significant
YDR242W	AMD2	Putative amidase	0.195702	0.435205	Not-significant	0.305501	0.0342838	Significant
YGL203C	KEX1	Cell death protease essential for hypochlorite-induced apoptosis	0.0752258	0.809653	Not-significant	0.300986	0.00512376	Significant
YDR082W	STN1	Telomere end-binding and capping protein	-0.197757	0.435205	Not-significant	0.299242	0.0346816	Significant
YBR094W	PBY1	Putative tubulin tyrosine ligase associated with P-bodies	0.226427	0.23987	Not-significant	0.298809	0.0204294	Significant
YMR240C	CUS1	Protein required for assembly of U2 snRNP into the spliceosome	-0.302315	0.162265	Not-significant	0.298669	0.0287138	Significant
YCR037C	PHO87	Low-affinity inorganic phosphate (Pi) transporter	-0.022369	0.957671	Not-significant	0.29789	0.00513537	Significant
YPL244C	HUT1	Protein with a role in UDP-galactose transport to the Golgi lumen	-0.281063	0.041835	Significant	0.29578	0.0122074	Significant
RDN18-2	RDN18-2	18S ribosomal RNA (18S rRNA)	0.345079	0.0178684	Significant	0.295434	0.00766168	Significant
YGR119C	NUP57	FG-nucleoporin component of central core of the nuclear pore complex	-0.171638	0.285886	Not-significant	0.295404	0.00764385	Significant
YDR212W	TCP1	Alpha subunit of chaperonin-containing T-complex	0.0436955	0.862643	Not-significant	0.292542	0.000471794	Significant
YKL063C	YKL063C	Putative protein of unknown function	0.2367	0.284399	Not-significant	0.292401	0.0488756	Significant
YPL050C	MNN9	Subunit of Golgi mannosyltransferase complex	-0.16035	0.327154	Not-significant	0.292247	0.00331774	Significant
YDR153C	ENT5	Protein containing an N-terminal epsin-like domain	0.100454	0.728406	Not-significant	0.292193	0.0187454	Significant
YPL159C	PET20	Mitochondrial protein	0.149477	0.544129	Not-significant	0.291672	0.0325757	Significant
YOL031C	SIL1	Nucleotide exchange factor for the ER lumenal Hsp70 chaperone Kar2p	-0.202499	0.348107	Not-significant	0.289479	0.0431872	Significant
YOR262W	YOR262W	Putative GTPase with a role in biogenesis of RNA pol II and polIII	-0.0351876	0.928125	Not-significant	0.288804	0.0433792	Significant
YNL091W	NST1	Protein of unknown function	0.0120062	0.971645	Not-significant	0.285705	0.0183802	Significant
YMR023C	MSS1	Mitochondrial protein	0.00761249	0.989145	Not-significant	0.285571	0.0371074	Significant
YDR054C	CDC34	Ubiquitin-conjugating enzyme (E2)	0.0828463	0.758234	Not-significant	0.284014	0.0118721	Significant
YDR188W	CCT6	Subunit of the cytosolic chaperonin Cct ring complex	0.00960709	0.983139	Not-significant	0.282357	0.0273086	Significant
YLR319C	BUD6	Actin- and formin-interacting protein	-0.0960806	0.731904	Not-significant	0.281277	0.0225368	Significant
YLR335W	NUP2	Nucleoporin involved in nucleocytoplasmic transport	-0.0321308	0.922618	Not-significant	0.280079	0.0159664	Significant
YJR093C	FIP1	Subunit of cleavage polyadenylation factor (CPF)	-0.121717	0.688522	Not-significant	0.279864	0.0443893	Significant
YLR094C	GIS3	Protein of unknown function	-0.308664	0.0172045	Significant	0.279422	0.0211413	Significant
YHL009C	YAP3	Basic leucine zipper (bZIP) transcription factor	0.000390528	0.999766	Not-significant	0.278868	0.0421433	Significant
YER158C	YER158C	Protein of unknown function	0.293811	0.012615	Significant	0.276842	0.0499914	Significant
YKL022C	CDC16	Subunit of the anaphase-promoting complex/cyclosome (APC/C)	0.00180126	0.997272	Not-significant	0.275834	0.0196454	Significant
YNL190W	YNL190W	Hydrophilin essential in desiccation-rehydration process	-0.114107	0.539487	Not-significant	0.271905	0.00674225	Significant
YDL053C	PBP4	Pbp1p binding protein	-0.124821	0.633675	Not-significant	0.269054	0.0323668	Significant
YBL041W	PRE7	Beta 6 subunit of the 20S proteasome	0.174268	0.393557	Not-significant	0.268573	0.0368281	Significant
YDR363W	ESC2	Sumo-like domain protein	0.107353	0.711947	Not-significant	0.266659	0.0336291	Significant
YJR101W	RSM26	Mitochondrial ribosomal protein of the small subunit	0.0205549	0.959733	Not-significant	0.26621	0.0191237	Significant
YGR017W	YGR017W	Putative protein of unknown function	-0.227212	0.102144	Not-significant	0.265674	0.00715649	Significant
YDR485C	VPS72	Htz1p-binding component of the SWR1 complex	0.100445	0.682988	Not-significant	0.264828	0.0115379	Significant
YEL009C	GCN4	bZIP transcriptional activator of amino acid biosynthetic genes	-0.351007	0.0166463	Significant	0.261241	0.0287926	Significant
YFL028C	CAF16	Part of evolutionarily-conserved CCR4-NOT regulatory complex	-0.139674	0.564713	Not-significant	0.257045	0.049898	Significant
YOL092W	YOL092W	Putative vacuolar membrane transporter for cationic amino acids	-0.167851	0.326356	Not-significant	0.256507	0.0201002	Significant
YPL181W	CTI6	Component of the Rpd3L histone deacetylase complex	-0.435492	0.000138923	Significant	0.255171	0.0380522	Significant
YFL007W	BLM10	Proteasome activator	0.234309	0.201977	Not-significant	0.250372	0.0175564	Significant
YDR164C	SEC1	Sm-like protein involved in docking and fusion of exocytic vesicles	-0.0830784	0.765593	Not-significant	0.242006	0.0287708	Significant
YJL041W	NSP1	FG-nucleoporin component of central core of the nuclear pore complex	-0.0589643	0.819937	Not-significant	0.24127	0.036469	Significant
YDL035C	GPR1	Plasma membrane G protein coupled receptor (GPCR)	0.0733542	0.818072	Not-significant	0.238029	0.0400046	Significant
YML007W	YAP1	Basic leucine zipper (bZIP) transcription factor	0.14267	0.428505	Not-significant	0.230112	0.0285154	Significant
YCR026C	NPP1	Nucleotide pyrophosphatase/phosphodiesterase	0.148498	0.327163	Not-significant	0.226834	0.0334219	Significant
YHR039C	MSC7	Protein of unknown function	0.0579786	0.862643	Not-significant	0.221096	0.0250704	Significant
YDR349C	YPS7	Putative GPI-anchored aspartic protease	0.0993966	0.606913	Not-significant	0.221043	0.012721	Significant
YKR084C	HBS1	GTPase with similarity to translation release factors	-0.119001	0.505401	Not-significant	0.21174	0.032678	Significant
YCL011C	GBP2	Poly(A+) RNA-binding protein	-0.0522063	0.862322	Not-significant	0.208972	0.0468991	Significant
YOR270C	VPH1	Subunit a of vacuolar-ATPase V0 domain	0.0129625	0.967195	Not-significant	0.198261	0.0272485	Significant
YGL114W	YGL114W	Putative protein of unknown function	-0.13129	0.531321	Not-significant	0.197987	0.0499293	Significant
YHR073W	OSH3	Member of an oxysterol-binding protein family	-0.0381101	0.904531	Not-significant	0.185952	0.0349454	Significant
YHR045W	YHR045W	Putative protein of unknown function	-0.0921397	0.792483	Not-significant	-0.213606	0.0476813	Significant
YML115C	VAN1	Component of the mannan polymerase I	-0.26647	0.0466927	Significant	-0.213884	0.0304289	Significant
YDL178W	DLD2	D-lactate dehydrogenase	-0.186015	0.277219	Not-significant	-0.215679	0.0235949	Significant
YML062C	MFT1	Subunit of the THO complex	-0.0296548	0.943125	Not-significant	-0.227694	0.0360816	Significant
YIL112W	HOS4	Subunit of the Set3 complex	0.0755076	0.783506	Not-significant	-0.229062	0.0163864	Significant
YDR244W	PEX5	Peroxisomal membrane signal receptor for peroxisomal matrix proteins	0.0805868	0.795167	Not-significant	-0.233793	0.0336233	Significant
YER161C	SPT2	Protein involved in negative regulation of transcription	-0.0511426	0.877444	Not-significant	-0.238848	0.0443151	Significant
YDR276C	PMP3	Small plasma membrane protein	0.0581622	0.848188	Not-significant	-0.239323	0.0450679	Significant
YBR146W	MRPS9	Mitochondrial ribosomal protein of the small subunit	-0.030181	0.938853	Not-significant	-0.239794	0.0179574	Significant
YPR129W	SCD6	Repressor of translation initiation	0.011141	0.974836	Not-significant	-0.2424	0.00783135	Significant
YAL023C	PMT2	Protein O-mannosyltransferase of the ER membrane	-0.17636	0.30773	Not-significant	-0.242829	0.017007	Significant
YGL231C	EMC4	Member of conserved ER transmembrane complex	0.0990362	0.704711	Not-significant	-0.244786	0.0357519	Significant
YGL011C	SCL1	Alpha 1 subunit of the 20S proteasome	0.311405	0.00904827	Significant	-0.249524	0.0122628	Significant
YIL107C	PFK26	6-phosphofructo-2-kinase	0.561828	8.42386e-09	Significant	-0.249788	0.022578	Significant
YFL041W	FET5	Multicopper oxidase	-0.065782	0.840763	Not-significant	-0.254041	0.0187686	Significant
YPL150W	YPL150W	Protein kinase of unknown cellular role	0.062726	0.844825	Not-significant	-0.254465	0.0244782	Significant
YKL077W	YKL077W	Putative protein of unknown function	-0.10419	0.729914	Not-significant	-0.255968	0.0259448	Significant
YGR235C	MOS2	Component of the MICOS complex	0.058157	0.871526	Not-significant	-0.256725	0.0452626	Significant
YAL021C	CCR4	Component of the CCR4-NOT transcriptional complex	0.0643459	0.844594	Not-significant	-0.25724	0.0248886	Significant
YNR033W	ABZ1	Para-aminobenzoate (PABA) synthase	0.176526	0.32384	Not-significant	-0.257787	0.0280511	Significant
YER059W	PCL6	Pho85p cyclin of the Pho80p subfamily	0.0691939	0.85717	Not-significant	-0.258646	0.0489146	Significant
YGR253C	PUP2	Alpha 5 subunit of the 20S proteasome	0.262834	0.0166463	Significant	-0.260765	0.0134066	Significant
YOR090C	PTC5	Mitochondrial type 2C protein phosphatase (PP2C)	-0.157463	0.370921	Not-significant	-0.261332	0.00843382	Significant
YBR251W	MRPS5	Mitochondrial ribosomal protein of the small subunit	0.0528263	0.868576	Not-significant	-0.262032	0.021803	Significant
YBR078W	ECM33	GPI-anchored protein of unknown function	0.0484096	0.841496	Not-significant	-0.264783	0.00343087	Significant
YHR114W	BZZ1	SH3 domain protein implicated in regulating actin polymerization	0.0680532	0.844594	Not-significant	-0.26679	0.0410594	Significant
YHR150W	PEX28	Peroxisomal integral membrane peroxin	0.1339	0.642268	Not-significant	-0.267016	0.0422245	Significant
YBL099W	ATP1	Alpha subunit of the F1 sector of mitochondrial F1F0 ATP synthase	-1.75431	3.89524e-80	Down-regulated	-0.267805	0.0201002	Significant
YMR219W	ESC1	Protein localized to the nuclear periphery	-0.0119321	0.975567	Not-significant	-0.267897	0.0474982	Significant
YOR085W	OST3	Gamma subunit of the oligosaccharyltransferase complex of the ER lumen	-0.0469538	0.9123	Not-significant	-0.268282	0.020359	Significant
YLR250W	SSP120	Protein of unknown function	0.0826232	0.780146	Not-significant	-0.268545	0.016755	Significant
YKL080W	VMA5	Subunit C of the V1 peripheral membrane domain of V-ATPase	-0.106655	0.604184	Not-significant	-0.2695	0.00283843	Significant
YKR021W	ALY1	Alpha arrestin, substrate of calcineurin	0.166125	0.557159	Not-significant	-0.27163	0.0484207	Significant
YBR044C	TCM62	Protein involved in assembly of the succinate dehydrogenase complex	-0.391033	0.00137885	Significant	-0.2728	0.00807875	Significant
YHR132C	ECM14	Putative metalloprotease with similarity to zinc carboxypeptidases	-0.152285	0.444577	Not-significant	-0.273483	0.0124675	Significant
YBR062C	YBR062C	Protein of unknown function that interacts with Msb2p	0.232223	0.276245	Not-significant	-0.273697	0.0298901	Significant
YML087C	AIM33	Putative protein of unknown function, highly conserved across species	-1.90679	8.06356e-59	Down-regulated	-0.274101	0.0132258	Significant
YMR002W	MIC17	Mitochondrial intermembrane space protein	0.280528	0.038828	Significant	-0.275821	0.0266887	Significant
YML117W	NAB6	Putative RNA-binding protein	0.086779	0.83627	Not-significant	-0.277382	0.0463677	Significant
YNL040W	YNL040W	Putative protein of unknown function	-0.118235	0.518839	Not-significant	-0.2784	0.0046237	Significant
YGL219C	MDM34	Mitochondrial component of the ERMES complex	-0.261561	0.0711089	Not-significant	-0.279212	0.0211094	Significant
YLR077W	FMP25	Protein required for assembly of respiratory complex III	0.0835144	0.750432	Not-significant	-0.279628	0.00799427	Significant
YKL040C	NFU1	Protein involved in iron metabolism in mitochondria	0.0605577	0.868229	Not-significant	-0.279983	0.014149	Significant
YJR043C	POL32	Third subunit of DNA polymerase delta	-0.0517158	0.912607	Not-significant	-0.280322	0.0479276	Significant
YHR051W	COX6	Subunit VI of cytochrome c oxidase (Complex IV)	-1.93496	3.89524e-80	Down-regulated	-0.280485	0.0028627	Significant
YDR071C	PAA1	Polyamine acetyltransferase	-0.229692	0.172717	Not-significant	-0.282226	0.00751233	Significant
YFR006W	YFR006W	Putative X-Pro aminopeptidase	-0.106063	0.682988	Not-significant	-0.282327	0.00454526	Significant
YNL284C	MRPL10	Mitochondrial ribosomal protein of the large subunit	-0.0131193	0.971334	Not-significant	-0.282931	0.00282679	Significant
YJR065C	ARP3	Essential component of the Arp2/3 complex	-0.0324883	0.946036	Not-significant	-0.283156	0.0441703	Significant
YLR421C	RPN13	Subunit of the 19S regulatory particle of the 26S proteasome lid	0.226326	0.314233	Not-significant	-0.28414	0.0362103	Significant
YIR010W	DSN1	Essential component of the MIND kinetochore complex	-0.0470782	0.9123	Not-significant	-0.28451	0.0388921	Significant
YML051W	GAL80	Transcriptional regulator involved in the repression of GAL genes	0.261357	0.249017	Not-significant	-0.285042	0.0362103	Significant
YFL013C	IES1	Subunit of the INO80 chromatin remodeling complex	-0.067332	0.813314	Not-significant	-0.285978	0.010242	Significant
YBR101C	FES1	Hsp70 (Ssa1p) nucleotide exchange factor	-0.0523142	0.882757	Not-significant	-0.287305	0.0280288	Significant
YGL022W	STT3	Subunit of the oligosaccharyltransferase complex of the ER lumen	0.059832	0.823944	Not-significant	-0.287517	0.00371614	Significant
YGL068W	MNP1	Protein associated with the mitochondrial nucleoid	-0.101605	0.729316	Not-significant	-0.287623	0.019457	Significant
YPR139C	VPS66	Lysophosphatidic acid acyltransferase	-0.191736	0.372184	Not-significant	-0.288462	0.0392891	Significant
YOR158W	PET123	Mitochondrial ribosomal protein of the small subunit	0.0307952	0.946722	Not-significant	-0.289332	0.022245	Significant
YDR142C	PEX7	Peroxisomal signal receptor for peroxisomal matrix proteins	-0.0201889	0.968898	Not-significant	-0.289914	0.040084	Significant
YGR099W	TEL2	Subunit of the ASTRA complex, involved in chromatin remodeling	-0.0348013	0.946265	Not-significant	-0.290425	0.0234365	Significant
YGL167C	PMR1	High affinity Ca2+/Mn2+ P-type ATPase	-0.0497342	0.9123	Not-significant	-0.290677	0.0228486	Significant
YJL161W	FMP33	Putative protein of unknown function	0.421534	0.0886933	Not-significant	-0.29069	0.0482432	Significant
YDR377W	ATP17	Subunit f of the F0 sector of mitochondrial F1F0 ATP synthase	-1.57034	3.16434e-42	Down-regulated	-0.29082	0.000862689	Significant
YOR362C	PRE10	Alpha 7 subunit of the 20S proteasome	0.284478	0.0695666	Not-significant	-0.290934	0.0466797	Significant
YPL118W	MRP51	Mitochondrial ribosomal protein of the small subunit	-0.209779	0.133032	Not-significant	-0.292946	0.00562481	Significant
YDL144C	YDL144C	Protein of unknown function	0.0329948	0.950749	Not-significant	-0.294688	0.0340788	Significant
YML061C	PIF1	DNA helicase, potent G-quadruplex DNA binder/unwinder	0.0368618	0.933949	Not-significant	-0.294866	0.0246263	Significant
YGR135W	PRE9	Alpha 3 subunit of the 20S proteasome	0.234034	0.33773	Not-significant	-0.296082	0.0396862	Significant
YLR153C	ACS2	Acetyl-coA synthetase isoform	0.321828	0.0813209	Not-significant	-0.296195	0.0129675	Significant
YBR109C	CMD1	Calmodulin	0.0956359	0.802731	Not-significant	-0.296211	0.028521	Significant
YBR049C	REB1	RNA polymerase I enhancer binding protein	-0.0416465	0.936309	Not-significant	-0.296565	0.0228102	Significant
YGL163C	RAD54	DNA-dependent ATPase that stimulates strand exchange	0.48756	7.24603e-05	Significant	-0.298475	0.00853279	Significant
YMR165C	PAH1	Mg2+-dependent phosphatidate (PA) phosphatase	0.0903616	0.775019	Not-significant	-0.299989	0.0264602	Significant
YKL197C	PEX1	AAA-peroxin	0.180613	0.491703	Not-significant	-0.30076	0.0166775	Significant
YOL038W	PRE6	Alpha 4 subunit of the 20S proteasome	0.295496	0.0298858	Significant	-0.300782	0.0292608	Significant
YJL096W	MRPL49	Mitochondrial ribosomal protein of the large subunit	0.172624	0.43337	Not-significant	-0.301548	0.0131922	Significant
YMR209C	YMR209C	Putative S-adenosylmethionine-dependent methyltransferase	-0.265744	0.256929	Not-significant	-0.302767	0.0103287	Significant
YJR139C	HOM6	Homoserine dehydrogenase (L-homoserine:NADP oxidoreductase)	-0.0291433	0.940564	Not-significant	-0.302815	0.00513836	Significant
YOR110W	TFC7	RNA pol III transcription initiation factor complex (TFIIIC) subunit	-0.103853	0.722846	Not-significant	-0.302948	0.0125611	Significant
YKL016C	ATP7	Subunit d of the stator stalk of mitochondrial F1F0 ATP synthase	-1.68255	4.06901e-93	Down-regulated	-0.303523	0.00220454	Significant
YDR175C	RSM24	Mitochondrial ribosomal protein of the small subunit	0.057903	0.85309	Not-significant	-0.305424	0.00427128	Significant
YER143W	DDI1	DNA damage-inducible v-SNARE binding protein	0.338015	0.0335623	Significant	-0.305495	0.0432373	Significant
YFR050C	PRE4	Beta 7 subunit of the 20S proteasome	0.287877	0.0346755	Significant	-0.305705	0.00631076	Significant
YLR370C	ARC18	Subunit of the ARP2/3 complex	0.000603612	0.999766	Not-significant	-0.305868	0.0277857	Significant
YKL007W	CAP1	Alpha subunit of the capping protein heterodimer (Cap1p and Cap2p)	-0.0856519	0.787628	Not-significant	-0.306525	0.0016747	Significant
YDL064W	UBC9	SUMO-conjugating enzyme involved in the Smt3p conjugation pathway	-0.182523	0.543335	Not-significant	-0.307513	0.0337239	Significant
YGL187C	COX4	Subunit IV of cytochrome c oxidase	-1.71363	9.9903e-60	Down-regulated	-0.308576	0.000586941	Significant
YDR262W	YDR262W	Putative protein of unknown function	0.0293847	0.948096	Not-significant	-0.308964	0.0160603	Significant
YAL008W	FUN14	Mitochondrial protein of unknown function	0.321032	0.312241	Not-significant	-0.309577	0.0380658	Significant
YDR050C	TPI1	Triose phosphate isomerase, abundant glycolytic enzyme	-0.0425926	0.939012	Not-significant	-0.30962	0.0349819	Significant
YLR262C-A	TMA7	Protein of unknown that associates with ribosomes	-0.363826	0.147621	Not-significant	-0.309657	0.0456276	Significant
YMR314W	PRE5	Alpha 6 subunit of the 20S proteasome	0.149843	0.55941	Not-significant	-0.310984	0.0306872	Significant
YER094C	PUP3	Beta 3 subunit of the 20S proteasome	0.258351	0.15963	Not-significant	-0.311144	0.0183825	Significant
YGL020C	GET1	Subunit of the GET complex	-0.0361375	0.932485	Not-significant	-0.311254	0.0252973	Significant
YMR102C	YMR102C	Protein of unknown function	0.181629	0.257462	Not-significant	-0.311617	0.0207249	Significant
YNL272C	SEC2	Guanyl-nucleotide exchange factor for the small G-protein Sec4p	-0.181424	0.456456	Not-significant	-0.312004	0.00917859	Significant
YLR239C	LIP2	Lipoyl ligase	0.0493904	0.916041	Not-significant	-0.312157	0.013968	Significant
YBR202W	MCM7	Component of the Mcm2-7 hexameric helicase complex	0.162353	0.562815	Not-significant	-0.312467	0.024914	Significant
YGL049C	TIF4632	Translation initiation factor eIF4G	0.0453906	0.901993	Not-significant	-0.31299	0.0310979	Significant
YAL014C	SYN8	Endosomal SNARE related to mammalian syntaxin 8	0.239178	0.376483	Not-significant	-0.313126	0.0454512	Significant
YPL225W	YPL225W	Protein of unknown function	-0.0913655	0.708388	Not-significant	-0.313346	0.0193192	Significant
YOL023W	IFM1	Mitochondrial translation initiation factor 2	0.176256	0.571782	Not-significant	-0.313644	0.0248875	Significant
YJL166W	QCR8	Subunit 8 of ubiquinol cytochrome-c reductase (Complex III)	-1.54445	1.74024e-27	Down-regulated	-0.313831	0.0132586	Significant
YJR051W	OSM1	Fumarate reductase, catalyzes the reduction of fumarate to succinate	-0.124672	0.731264	Not-significant	-0.314038	0.0164139	Significant
YNL137C	NAM9	Mitochondrial ribosomal component of the small subunit	-0.0963618	0.750432	Not-significant	-0.314139	0.000920107	Significant
YHR218W-A	YHR218W-A	Dubious open reading frame	-0.0926488	0.815899	Not-significant	-0.314479	0.0340736	Significant
YGL137W	SEC27	Essential beta'-coat protein of the COPI coatomer	-0.128136	0.404824	Not-significant	-0.31509	0.00499411	Significant
YLL009C	COX17	Copper metallochaperone that transfers copper to Sco1p and Cox11p	-0.186068	0.404824	Not-significant	-0.316147	0.0490046	Significant
YER087W	AIM10	Protein with similarity to tRNA synthetases	0.0751821	0.882757	Not-significant	-0.316285	0.0443133	Significant
YLR095C	IOC2	Subunit of the Isw1b complex	0.0244217	0.957694	Not-significant	-0.317818	0.00414168	Significant
YGL197W	MDS3	Putative component of the TOR regulatory pathway	0.214353	0.472833	Not-significant	-0.318531	0.0400046	Significant
YGL253W	HXK2	Hexokinase isoenzyme 2	-0.263288	0.187484	Not-significant	-0.319023	0.0112145	Significant
YEL024W	RIP1	Ubiquinol-cytochrome-c reductase	-1.524	2.00641e-61	Down-regulated	-0.319416	0.00213333	Significant
YDR007W	TRP1	Phosphoribosylanthranilate isomerase	2.72602	1.48383e-100	Up-regulated	-0.320006	0.0236958	Significant
YJR133W	XPT1	Xanthine-guanine phosphoribosyl transferase	0.103482	0.731904	Not-significant	-0.320918	0.00426456	Significant
YMR188C	MRPS17	Mitochondrial ribosomal protein of the small subunit	0.119107	0.671817	Not-significant	-0.320924	0.00611655	Significant
YLL006W	MMM1	ER integral membrane protein, ERMES complex subunit	-0.139588	0.688522	Not-significant	-0.321183	0.040156	Significant
YGL216W	KIP3	Kinesin-related antiparallel sliding motor protein	0.0969875	0.797256	Not-significant	-0.322309	0.011217	Significant
YDR529C	QCR7	Subunit 7 of ubiquinol cytochrome-c reductase (Complex III)	-1.67771	2.63059e-69	Down-regulated	-0.322477	0.00107069	Significant
YMR008C	PLB1	Phospholipase B (lysophospholipase) involved in lipid metabolism	0.130626	0.693194	Not-significant	-0.323849	0.0105215	Significant
YLR100W	ERG27	3-keto sterol reductase	-0.00982446	0.983139	Not-significant	-0.325164	0.0454524	Significant
YKL085W	MDH1	Mitochondrial malate dehydrogenase	-1.29411	3.16351e-33	Down-regulated	-0.325672	0.0103227	Significant
YNR023W	SNF12	73 kDa subunit of the SWI/SNF chromatin remodeling complex	0.0662595	0.862643	Not-significant	-0.325846	0.00521861	Significant
YDR272W	GLO2	Cytoplasmic glyoxalase II	0.187906	0.36736	Not-significant	-0.326205	0.00858871	Significant
YGL212W	VAM7	Vacuolar SNARE protein	0.140627	0.765716	Not-significant	-0.326443	0.0481286	Significant
YNL206C	RTT106	Histone chaperone	0.0384812	0.916682	Not-significant	-0.326741	0.00248019	Significant
YNL048W	ALG11	Alpha-1,2-mannosyltransferase	-0.347855	0.054177	Not-significant	-0.326855	0.0318174	Significant
YJL055W	YJL055W	Putative protein of unknown function	0.0533527	0.919028	Not-significant	-0.327808	0.0409063	Significant
YKL219W	COS9	Protein of unknown function	-0.121234	0.769137	Not-significant	-0.328426	0.0288614	Significant
YOR138C	RUP1	Protein that regulates ubiquitination of Rsp5p	-0.174926	0.351923	Not-significant	-0.329792	0.00659741	Significant
YGR262C	BUD32	Protein kinase	-0.0815079	0.864854	Not-significant	-0.329953	0.0321492	Significant
YMR225C	MRPL44	Mitochondrial ribosomal protein of the large subunit	-0.0620423	0.881722	Not-significant	-0.330711	0.0282774	Significant
YPL002C	SNF8	Component of the ESCRT-II complex	0.170976	0.567604	Not-significant	-0.331024	0.021033	Significant
YML086C	ALO1	D-Arabinono-1,4-lactone oxidase	0.255344	0.115505	Not-significant	-0.331032	0.0132498	Significant
YDR375C	BCS1	Protein translocase and chaperone required for Complex III assembly	-0.0176966	0.971334	Not-significant	-0.331066	0.012648	Significant
YJL062W	LAS21	Integral plasma membrane protein	-0.198578	0.414638	Not-significant	-0.332068	0.00700078	Significant
YGL080W	FMP37	Highly conserved subunit of the mitochondrial pyruvate carrier	-0.00721838	0.990957	Not-significant	-0.332398	0.0452626	Significant
YJL081C	ARP4	Nuclear actin-related protein involved in chromatin remodeling	-0.188269	0.226153	Not-significant	-0.332784	0.00046362	Significant
YNL055C	POR1	Mitochondrial porin (voltage-dependent anion channel)	-1.17369	3.28714e-21	Down-regulated	-0.332946	0.038985	Significant
YPL194W	DDC1	DNA damage checkpoint protein	-0.0179525	0.975791	Not-significant	-0.333283	0.0287594	Significant
YHR147C	MRPL6	Mitochondrial ribosomal protein of the large subunit	0.0653636	0.862643	Not-significant	-0.333559	0.00824003	Significant
YML072C	TCB3	Cortical ER protein involved in ER-plasma membrane tethering	-0.118836	0.731779	Not-significant	-0.333895	0.0254872	Significant
YBR273C	UBX7	UBX (ubiquitin regulatory X) domain-containing protein	0.0516957	0.900807	Not-significant	-0.334264	0.0324046	Significant
YNL011C	YNL011C	Putative protein of unknown function	0.114219	0.809499	Not-significant	-0.335085	0.036243	Significant
YIL050W	PCL7	Pho85p cyclin of the Pho80p subfamily	-0.363483	0.0265486	Significant	-0.335622	0.0295435	Significant
YHR005C-A	TIM10	Essential protein of the mitochondrial intermembrane space	-0.136707	0.638017	Not-significant	-0.335683	0.00422959	Significant
YNL039W	BDP1	Essential subunit of RNA polymerase III transcription factor (TFIIIB)	0.0174208	0.971334	Not-significant	-0.335828	0.00206288	Significant
YKL196C	YKT6	Vesicle membrane protein (v-SNARE) with acyltransferase activity	0.165223	0.51877	Not-significant	-0.335958	0.029946	Significant
YMR097C	MTG1	Putative GTPase peripheral to the mitochondrial inner membrane	-0.0309197	0.947205	Not-significant	-0.336586	0.00871723	Significant
YKL094W	YJU3	Monoglyceride lipase (MGL)	0.0757706	0.818072	Not-significant	-0.336806	0.0103287	Significant
YHR117W	TOM71	Mitochondrial outer membrane protein	0.200918	0.291226	Not-significant	-0.337234	0.00710759	Significant
YBL011W	SCT1	Glycerol 3-phosphate/dihydroxyacetone phosphate sn-1 acyltransferase	-0.0601992	0.871619	Not-significant	-0.337429	0.0165107	Significant
YGR005C	TFG2	TFIIF (Transcription Factor II) middle subunit	0.0169219	0.962099	Not-significant	-0.337616	0.00379942	Significant
YFR033C	QCR6	Subunit 6 of the ubiquinol cytochrome-c reductase complex	-1.51041	5.29253e-31	Down-regulated	-0.338317	0.0374375	Significant
YGL142C	GPI10	Integral membrane protein involved in GPI anchor synthesis	-0.00956091	0.985985	Not-significant	-0.339192	0.0263441	Significant
YDL095W	PMT1	Protein O-mannosyltransferase of the ER membrane	-0.159105	0.460795	Not-significant	-0.340307	0.000182425	Significant
YPR023C	EAF3	Component of the Rpd3S histone deacetylase complex	-0.0514801	0.900351	Not-significant	-0.341488	0.00483905	Significant
YEL077C	YEL077C	Helicase-like protein encoded within the telomeric Y' element	0.0248235	0.968898	Not-significant	-0.342164	0.0379769	Significant
YLR191W	PEX13	Peroxisomal importomer complex component	0.0862961	0.815408	Not-significant	-0.342837	0.00535775	Significant
YOL070C	NBA1	Protein of unknown function	0.0538275	0.907655	Not-significant	-0.34286	0.0418921	Significant
YKR046C	PET10	Protein of unknown function that localizes to lipid particles	0.294173	0.145977	Not-significant	-0.343435	0.0287704	Significant
YDR539W	FDC1	Putative phenylacrylic acid decarboxylase	-0.106718	0.721875	Not-significant	-0.343623	0.0126202	Significant
YDL045C	FAD1	Flavin adenine dinucleotide (FAD) synthetase	-0.0656992	0.844594	Not-significant	-0.344146	0.0033614	Significant
YCR073W-A	SOL2	Protein with a possible role in tRNA export	0.0367067	0.940564	Not-significant	-0.344541	0.0325949	Significant
YLR182W	SWI6	Transcription cofactor	-0.111641	0.746193	Not-significant	-0.344564	0.00631076	Significant
YDL135C	RDI1	Rho GDP dissociation inhibitor	-0.0658564	0.872816	Not-significant	-0.345047	0.00605231	Significant
YCR009C	RVS161	Amphiphysin-like lipid raft protein	-0.0619757	0.836473	Not-significant	-0.345165	0.00212365	Significant
YJL001W	PRE3	Beta 1 subunit of the 20S proteasome	0.387104	0.0049615	Significant	-0.34527	0.003236	Significant
YCL057W	PRD1	Zinc metalloendopeptidase	-0.0544878	0.899432	Not-significant	-0.34545	0.00940135	Significant
YLL040C	VPS13	Protein involved in prospore membrane morphogenesis	0.198341	0.574818	Not-significant	-0.345819	0.0436596	Significant
YOR290C	SNF2	Catalytic subunit of the SWI/SNF chromatin remodeling complex	-0.167239	0.595396	Not-significant	-0.347779	0.0150898	Significant
YJR135W-A	TIM8	Mitochondrial intermembrane space protein	-0.160852	0.659433	Not-significant	-0.348378	0.0320679	Significant
YGR244C	LSC2	Beta subunit of succinyl-CoA ligase	-0.738847	1.81712e-22	Significant	-0.348494	0.00154501	Significant
YDR246W	TRS23	Core component of transport protein particle (TRAPP) complexes I-III	0.219763	0.413733	Not-significant	-0.348526	0.0323763	Significant
YKL146W	AVT3	Vacuolar transporter	-0.602901	0.00034796	Significant	-0.349303	0.0277573	Significant
YFR004W	RPN11	Metalloprotease subunit of 19S regulatory particle	0.197026	0.117337	Not-significant	-0.350373	0.00148639	Significant
YKL025C	PAN3	Essential subunit of the Pan2p-Pan3p poly(A)-ribonuclease complex	0.0553626	0.916655	Not-significant	-0.350981	0.0325757	Significant
YPL271W	ATP15	Epsilon subunit of the F1 sector of mitochondrial F1F0 ATP synthase	-1.12292	2.78293e-17	Down-regulated	-0.351752	0.0121992	Significant
YLL031C	GPI13	ER membrane localized phosphoryltransferase	0.112087	0.774519	Not-significant	-0.352056	0.0217345	Significant
YOR330C	MIP1	Mitochondrial DNA polymerase gamma subunit	-0.0370488	0.946036	Not-significant	-0.352318	0.00713726	Significant
YDR432W	NPL3	RNA-binding protein	0.214922	0.213509	Not-significant	-0.352852	0.0260967	Significant
YJR048W	CYC1	Cytochrome c, isoform 1	-1.87389	1.80324e-34	Down-regulated	-0.35347	0.00866837	Significant
YOR367W	SCP1	Component of yeast cortical actin cytoskeleton	0.086819	0.844594	Not-significant	-0.356323	0.0286007	Significant
YMR092C	AIP1	Actin cortical patch component	-0.0088348	0.982143	Not-significant	-0.357418	0.00394547	Significant
YEL013W	VAC8	Phosphorylated and palmitoylated vacuolar membrane protein	0.0996712	0.775019	Not-significant	-0.35787	0.00562801	Significant
YNL309W	STB1	Protein with role in regulation of MBF-specific transcription at Start	0.115202	0.841496	Not-significant	-0.357989	0.0430054	Significant
YOR194C	TOA1	TFIIA large subunit	-0.087087	0.78376	Not-significant	-0.359018	0.0130947	Significant
YLL001W	DNM1	Dynamin-related GTPase involved in mitochondrial organization	-0.543429	0.00347926	Significant	-0.359078	0.0217151	Significant
YOR047C	STD1	Protein involved in control of glucose-regulated gene expression	0.0669028	0.877473	Not-significant	-0.35954	0.0129972	Significant
YCR048W	ARE1	Acyl-CoA:sterol acyltransferase	0.115482	0.803071	Not-significant	-0.360069	0.0431185	Significant
YOR261C	RPN8	Essential non-ATPase regulatory subunit of the 26S proteasome	0.148906	0.599322	Not-significant	-0.36054	0.00438206	Significant
YAR003W	SWD1	Subunit of the COMPASS (Set1C) complex	-0.075217	0.86925	Not-significant	-0.360685	0.0158762	Significant
YLR433C	CNA1	Calcineurin A	0.00141696	0.997596	Not-significant	-0.360872	0.00062972	Significant
YOR073W	SGO1	Component of the spindle checkpoint	0.0506762	0.9123	Not-significant	-0.361603	0.0103287	Significant
YDR294C	DPL1	Dihydrosphingosine phosphate lyase	0.0931159	0.701405	Not-significant	-0.361927	0.000443321	Significant
YBL007C	SLA1	Cytoskeletal protein binding protein	-0.173819	0.505401	Not-significant	-0.361983	0.031625	Significant
YPL164C	MLH3	Protein involved in DNA mismatch repair and meiotic recombination	0.034367	0.951519	Not-significant	-0.363172	0.0197307	Significant
YPR075C	OPY2	Integral membrane protein that acts as a membrane anchor for Ste50p	0.152518	0.562137	Not-significant	-0.363216	0.0155024	Significant
YLR038C	COX12	Subunit VIb of cytochrome c oxidase	-1.51153	1.05178e-48	Down-regulated	-0.363472	4.8607e-05	Significant
YDR296W	MHR1	Protein involved in homologous recombination in mitochondria	0.0609686	0.902503	Not-significant	-0.364264	0.0329851	Significant
YKR010C	TOF2	Protein required for rDNA silencing and mitotic rDNA condensation	-0.0200443	0.971334	Not-significant	-0.365482	0.00647386	Significant
YKL038W	RGT1	Glucose-responsive transcription factor	-0.248393	0.337691	Not-significant	-0.366612	0.0211964	Significant
YKR085C	MRPL20	Mitochondrial ribosomal protein of the large subunit	-0.00660964	0.990131	Not-significant	-0.366627	0.00494538	Significant
YLR118C	YLR118C	Acyl-protein thioesterase responsible for depalmitoylation of Gpa1p	0.239976	0.300275	Not-significant	-0.367724	0.00738146	Significant
YNL083W	SAL1	ADP/ATP transporter	0.0331559	0.946722	Not-significant	-0.368836	0.00408763	Significant
YKL210W	UBA1	Ubiquitin activating enzyme (E1)	0.167616	0.48339	Not-significant	-0.369004	0.00259817	Significant
YKR035W-A	DID2	Class E protein of the vacuolar protein-sorting (Vps) pathway	-0.0572419	0.868229	Not-significant	-0.369429	0.000596025	Significant
YBR073W	RDH54	DNA-dependent ATPase	0.432441	0.044988	Significant	-0.370289	0.0454106	Significant
YPR180W	AOS1	Subunit of heterodimeric nuclear SUMO activating enzyme E1 with Uba2p	0.101613	0.807525	Not-significant	-0.371006	0.0201683	Significant
YGL071W	AFT1	Transcription factor involved in iron utilization and homeostasis	-0.0937736	0.841056	Not-significant	-0.371353	0.0209712	Significant
YBR008C	FLR1	Plasma membrane transporter of the major facilitator superfamily	0.131674	0.733907	Not-significant	-0.37149	0.0211663	Significant
YKL088W	CAB3	Subunit of PPCDC and CoA-SPC complexes involved in CoA biosynthesis	-0.107276	0.723496	Not-significant	-0.371576	0.00692483	Significant
YJL034W	KAR2	ATPase involved in protein import into the ER	0.342012	0.117337	Not-significant	-0.372764	0.00746186	Significant
YIL039W	TED1	GPI-glycan remodelase	-0.156903	0.32384	Not-significant	-0.374345	5.1196e-06	Significant
YGR206W	MVB12	ESCRT-I subunit required to stabilize ESCRT-I core complex oligomers	0.0389932	0.953476	Not-significant	-0.374456	0.0487575	Significant
YHR041C	SRB2	Subunit of the RNA polymerase II mediator complex	-0.351474	0.208161	Not-significant	-0.37473	0.027978	Significant
[truncated: 4,184 more rows]

## Sheet: 4h
gene_id	gene_name	brief_description	log2FC(pam16-3-4h/WT-4h)	FDR	Type	log2FC(WT4h/WT0h)	FDR_HSR	Type_HSR
YDR218C	SPR28	Sporulation-specific homolog of the CDC3/10/11/12 family of genes	0.159345	0.753747	Not-significant	5.30139	3.16805e-22	Up-regulated
YGR296C-B	YGR296C-B	Dubious open reading frame	0.407146	0.835645	Not-significant	5.26489	0.00239312	Up-regulated
YOL047C	YOL047C	Protein Involved in spore wall assembly	1.1759	1.28371e-05	Up-regulated	5.19676	1.51786e-25	Up-regulated
YGR273C	YGR273C	Putative protein of unknown function	-0.16545	0.907605	Not-significant	5.16257	0.00014404	Up-regulated
YLR410W-A	YLR410W-A	Retrotransposon TYA Gag gene co-transcribed with TYB Pol	-0.508902	0.731934	Not-significant	4.63437	0.013508	Up-regulated
YFL058W	THI5	Protein involved in synthesis of the thiamine precursor HMP	-1.19666	0.0259025	Down-regulated	4.6221	1.41369e-09	Up-regulated
YFR026C	ULI1	Putative protein of unknown function	-2.93009	2.16528e-05	Down-regulated	4.55588	7.98959e-15	Up-regulated
YNL332W	THI12	Protein involved in synthesis of the thiamine precursor HMP	-0.851963	0.0189844	Significant	4.47257	2.26406e-41	Up-regulated
YKR093W	PTR2	Integral membrane peptide transporter	-0.885203	1.12833e-05	Significant	4.45799	5.43728e-56	Up-regulated
YML066C	SMA2	Meiosis-specific prospore membrane protein	0.529445	0.598224	Not-significant	4.23648	0.00288167	Up-regulated
YOR072W-B	YOR072W-B	Putative protein of unknown function	-2.65	0.0863556	Not-significant	4.21865	0.00308617	Up-regulated
YPL033C	SRL4	Protein of unknown function	-0.544522	0.230956	Not-significant	4.1036	2.02345e-09	Up-regulated
YDR540C	IRC4	Putative protein of unknown function	-0.907274	0.0509438	Not-significant	4.09512	6.76002e-19	Up-regulated
YPR078C	YPR078C	Putative protein of unknown function	0.621812	0.174052	Not-significant	4.01393	2.67556e-13	Up-regulated
YGL170C	SPO74	Component of the meiotic outer plaque of the spindle pole body	0.697108	0.0947304	Not-significant	3.86697	1.81256e-08	Up-regulated
YDL037C	BSC1	Protein of unconfirmed function	0.165478	0.818862	Not-significant	3.83133	3.36503e-22	Up-regulated
YAL018C	YAL018C	Protein Involved in spore wall assembly	-0.458037	0.700652	Not-significant	3.81435	0.00204856	Up-regulated
YFR012W	DCV1	Protein of unknown function	0.118353	0.847103	Not-significant	3.8051	4.33157e-07	Up-regulated
YDL039C	PRM7	Pheromone-regulated protein	0.123403	0.881682	Not-significant	3.796	5.73776e-26	Up-regulated
YOR306C	MCH5	Plasma membrane riboflavin transporter	1.33187	0.00118127	Up-regulated	3.70022	1.73163e-49	Up-regulated
YHR126C	ANS1	Putative GPI protein	1.68511	0.110417	Not-significant	3.67475	4.54455e-08	Up-regulated
YKR061W	KTR2	Mannosyltransferase involved in N-linked protein glycosylation	0.160935	0.627475	Not-significant	3.64449	1.01882e-70	Up-regulated
YLR214W	FRE1	Ferric reductase and cupric reductase	0.194487	0.404052	Not-significant	3.55949	8.72271e-71	Up-regulated
YOR255W	OSW1	Protein involved in sporulation	0.354811	0.816106	Not-significant	3.55465	0.025701	Up-regulated
YPR077C	YPR077C	Dubious open reading frame	0.41929	0.243365	Not-significant	3.54305	8.02461e-12	Up-regulated
YAR062W	YAR062W	Pseudogenic fragment with similarity to flocculins	-0.912917	0.493521	Not-significant	3.54295	0.0196114	Up-regulated
YDR317W	HIM1	Protein of unknown function involved in DNA repair	0.0570992	0.899716	Not-significant	3.52891	6.8941e-17	Up-regulated
YER085C	YER085C	Putative protein of unknown function	0.242093	0.628469	Not-significant	3.50944	2.65392e-07	Up-regulated
YFR012W-A	YFR012W-A	Putative protein of unknown function	-0.45204	0.558103	Not-significant	3.50324	0.000270832	Up-regulated
snR7-S	snR7-S	U5 spliceosomal RNA (U5 snRNA), short form	0.280186	0.652197	Not-significant	3.4928	1.22459e-05	Up-regulated
YHR048W	YHK8	Presumed antiporter of the major facilitator superfamily	0.826473	0.0703241	Not-significant	3.46019	4.07357e-09	Up-regulated
YDR261W-B	YDR261W-B	Retrotransposon TYA Gag and TYB Pol genes	-1.21013	6.89161e-10	Down-regulated	3.4335	1.55228e-79	Up-regulated
YGL015C	YGL015C	Putative protein of unknown function	-0.115904	0.892487	Not-significant	3.40196	9.16339e-05	Up-regulated
YHL012W	YHL012W	Putative UTP glucose-1-phosphate uridylyltransferase	-0.0582625	0.944309	Not-significant	3.38392	1.69275e-07	Up-regulated
YHR079C-A	SAE3	Meiosis-specific protein involved in meiotic recombination	0.513419	0.689145	Not-significant	3.38048	0.0374771	Up-regulated
YDL071C	YDL071C	Dubious open reading frame	-0.361951	0.774778	Not-significant	3.33672	0.0176659	Up-regulated
YPL136W	YPL136W	Dubious open reading frame	0.390785	0.783299	Not-significant	3.3334	0.0352103	Up-regulated
YGR039W	YGR039W	Dubious open reading frame	-0.981015	0.026683	Significant	3.29961	1.64017e-10	Up-regulated
YGL158W	RCK1	Protein kinase involved in the response to oxidative stress	0.788157	0.0105509	Significant	3.26891	6.17322e-14	Up-regulated
YMR141C	YMR141C	Dubious open reading frame	-0.702244	0.207109	Not-significant	3.2559	5.75737e-06	Up-regulated
YMR244W	YMR244W	Putative protein of unknown function	1.83453	0.0241044	Up-regulated	3.24791	6.54187e-11	Up-regulated
YBR076W	ECM8	Non-essential protein of unknown function	0.0623585	0.94056	Not-significant	3.1653	4.82901e-06	Up-regulated
YCL036W	GFD2	Protein of unknown function	0.0488563	0.861285	Not-significant	3.16	2.30474e-116	Up-regulated
YNL065W	AQR1	Plasma membrane transporter of the major facilitator superfamily	0.822864	1.67382e-07	Significant	3.14729	7.47442e-51	Up-regulated
YNL228W	YNL228W	Dubious open reading frame	-0.197388	0.901193	Not-significant	3.14657	0.04272	Up-regulated
YGR138C	TPO2	Polyamine transporter of the major facilitator superfamily	0.409746	0.0914487	Not-significant	3.10512	2.06039e-09	Up-regulated
YGL255W	ZRT1	High-affinity zinc transporter of the plasma membrane	-1.16506	1.26326e-17	Down-regulated	3.08412	1.61872e-67	Up-regulated
YGR213C	RTA1	Protein involved in 7-aminocholesterol resistance	0.751964	0.208765	Not-significant	3.07416	2.33056e-05	Up-regulated
YNL141W	AAH1	Adenine deaminase (adenine aminohydrolase)	0.537731	0.00637553	Significant	3.05583	1.41318e-76	Up-regulated
YOR192C-B	YOR192C-B	Retrotransposon TYA Gag and TYB Pol genes	-0.728484	0.00540702	Significant	3.04918	4.30772e-40	Up-regulated
YCL019W	YCL019W	Retrotransposon TYA Gag and TYB Pol genes	-0.520042	0.000954391	Significant	3.00052	6.38107e-111	Up-regulated
YMR011W	HXT2	High-affinity glucose transporter of the major facilitator superfamily	0.146601	0.905583	Not-significant	2.97933	8.19175e-05	Up-regulated
YHR071C-A	YHR071C-A	Dubious open reading frame	-0.33475	0.718165	Not-significant	2.95027	0.000535679	Up-regulated
YOL152W	FRE7	Putative ferric reductase with similarity to Fre2p	-1.05586	0.0604766	Not-significant	2.93757	7.60487e-09	Up-regulated
YCL037C	SRO9	Cytoplasmic RNA-binding protein	-0.55341	0.212967	Not-significant	2.92378	6.06111e-15	Up-regulated
YPL114W	YPL114W	Dubious open reading frame	0.0890142	0.859245	Not-significant	2.91836	4.79278e-09	Up-regulated
YIR027C	DAL1	Allantoinase	0.151312	0.806177	Not-significant	2.89025	3.43349e-10	Up-regulated
YGL007W	BRP1	Dubious ORF located in the upstream region of PMA1	-1.0284	0.405486	Not-significant	2.87299	0.0223656	Up-regulated
YDR210W-A	YDR210W-A	Retrotransposon TYA Gag gene co-transcribed with TYB Pol	-1.6253	0.0128728	Down-regulated	2.86823	4.38282e-05	Up-regulated
YOR338W	YOR338W	Putative protein of unknown function	0.826939	1.32444e-05	Significant	2.86144	5.70699e-85	Up-regulated
snR66	snR66	C/D box small nucleolar RNA (snoRNA)	-0.751032	0.458017	Not-significant	2.8412	0.0088135	Up-regulated
YCR045C	RRT12	Probable subtilisin-family protease	-1.28391	0.0939721	Not-significant	2.81585	0.000178553	Up-regulated
YFR023W	PES4	Poly(A) binding protein, suppressor of DNA polymerase epsilon mutation	0.211845	0.669762	Not-significant	2.77346	4.30498e-11	Up-regulated
YLR255C	YLR255C	Dubious open reading frame	0.62114	0.408125	Not-significant	2.75721	0.011993	Up-regulated
YDR446W	ECM11	Meiosis-specific protein	1.50625	0.000245306	Up-regulated	2.75305	0.00191182	Up-regulated
YJL135W	YJL135W	Dubious open reading frame	-0.818665	0.350371	Not-significant	2.74773	0.00505642	Up-regulated
YHR092C	HXT4	High-affinity glucose transporter	0.23185	0.731958	Not-significant	2.7449	2.05589e-11	Up-regulated
YDR014W-A	HED1	Meiosis-specific protein	0.248899	0.645382	Not-significant	2.73939	7.44103e-09	Up-regulated
YCL026C-A	FRM2	Type II nitroreductase, using NADH as reductant	-1.0747	0.0313623	Down-regulated	2.73425	4.67206e-05	Up-regulated
YML130C	ERO1	Thiol oxidase required for oxidative protein folding in the ER	-0.217454	0.428128	Not-significant	2.73007	4.269e-46	Up-regulated
YMR315W-A	YMR315W-A	Putative protein of unknown function	0.634094	0.22752	Not-significant	2.71135	0.00102012	Up-regulated
YOL156W	HXT11	Putative hexose transporter that is nearly identical to Hxt9p	0.481667	0.397491	Not-significant	2.69757	0.001351	Up-regulated
YER087C-A	YER087C-A	Dubious open reading frame	-0.3902	0.708738	Not-significant	2.69548	0.0141375	Up-regulated
YML047C	PRM6	Potassium transporter that mediates K+ influx	0.480778	0.573822	Not-significant	2.69284	0.0125778	Up-regulated
snR67	snR67	C/D box small nucleolar RNA (snoRNA)	0.561746	0.517671	Not-significant	2.67817	0.00521339	Up-regulated
YLL005C	SPO75	Meiosis-specific protein of unknown function	1.25618	0.019887	Up-regulated	2.67355	0.00691091	Up-regulated
YEL035C	UTR5	Protein of unknown function	0.355225	0.701618	Not-significant	2.6561	0.00566698	Up-regulated
tK(UUU)D	tK(UUU)D	Lysine tRNA (tRNA-Lys), predicted by tRNAscan-SE analysis	0.809195	0.170407	Not-significant	2.63866	0.00866368	Up-regulated
YCR098C	GIT1	Plasma membrane permease	-2.18134	2.25451e-11	Down-regulated	2.63411	1.68344e-10	Up-regulated
YCL021W-A	YCL021W-A	Putative protein of unknown function	-0.219276	0.68555	Not-significant	2.63121	3.98996e-08	Up-regulated
YFL002W-A	YFL002W-A	Retrotransposon TYA Gag and TYB Pol genes	-0.926109	1.44376e-10	Significant	2.62317	1.19492e-81	Up-regulated
YBR105C	VID24	GID Complex regulatory subunit	0.922795	7.61691e-07	Significant	2.59557	4.82634e-40	Up-regulated
YDL242W	YDL242W	Dubious open reading frame	-0.929682	0.269298	Not-significant	2.58865	0.00518273	Up-regulated
YDL114W	YDL114W	Putative short-chain dehydrogenase/reductase	-0.00458908	0.996482	Not-significant	2.58112	0.00186619	Up-regulated
YBL039C-A	YBL039C-A	Dubious open reading frame	0.0817892	0.961547	Not-significant	2.56836	0.021484	Up-regulated
YMR101C	SRT1	Cis-prenyltransferase	0.296822	0.576933	Not-significant	2.53596	2.92259e-08	Up-regulated
YBL054W	TOD6	PAC motif binding protein involved in rRNA and ribosome biogenesis	-0.0418182	0.852127	Not-significant	2.51189	8.31958e-73	Up-regulated
YCL001W-B	YCL001W-B	Putative protein of unknown function	0.65901	0.417596	Not-significant	2.50223	0.016448	Up-regulated
YCL001W-A	YCL001W-A	Putative protein of unknown function	0.346425	0.760061	Not-significant	2.49145	0.0382031	Up-regulated
YBR040W	FIG1	Integral membrane protein required for efficient mating	-0.25921	0.826483	Not-significant	2.48472	0.00581573	Up-regulated
YJR114W	YJR114W	Dubious open reading frame	0.198219	0.869551	Not-significant	2.48361	0.0210303	Up-regulated
YJR079W	YJR079W	Putative protein of unknown function	-0.434447	0.580083	Not-significant	2.48252	0.000588292	Up-regulated
YBL100W-B	YBL100W-B	Retrotransposon TYA Gag and TYB Pol genes	-1.00403	0.000565504	Down-regulated	2.47534	3.33579e-10	Up-regulated
YLR349W	YLR349W	Dubious open reading frame	-1.74175	0.000322594	Down-regulated	2.4694	1.19573e-05	Up-regulated
YJL038C	YJL038C	Protein involved in outer spore wall assembly	0.443226	0.433647	Not-significant	2.46379	0.0015076	Up-regulated
YGL184C	STR3	Peroxisomal cystathionine beta-lyase	-1.58286	1.61521e-06	Down-regulated	2.45765	7.45478e-11	Up-regulated
YDR034C-D	YDR034C-D	Retrotransposon TYA Gag and TYB Pol genes	-0.687615	0.00300883	Significant	2.45577	2.01766e-36	Up-regulated
YIL117C	PRM5	Pheromone-regulated protein, predicted to have 1 transmembrane segment	0.171637	0.417596	Not-significant	2.4406	4.65407e-72	Up-regulated
YBL094C	YBL094C	Dubious open reading frame	-0.0994968	0.935071	Not-significant	2.43268	0.0078568	Up-regulated
YML058W-A	HUG1	Protein involved in the Mec1p-mediated checkpoint pathway	-0.71637	0.199804	Not-significant	2.43142	3.68538e-07	Up-regulated
YER044C-A	MEI4	Meiosis-specific protein involved in forming DSBs	0.270653	0.608327	Not-significant	2.42818	4.49038e-08	Up-regulated
YDR210W-B	YDR210W-B	Retrotransposon TYA Gag and TYB Pol genes	-1.27406	1.01612e-07	Down-regulated	2.4186	1.31786e-21	Up-regulated
YMR050C	YMR050C	Retrotransposon TYA Gag and TYB Pol genes	0.385623	0.233489	Not-significant	2.41043	3.69379e-05	Up-regulated
YBR250W	SPO23	Protein of unknown function	0.174277	0.631049	Not-significant	2.40095	8.66528e-14	Up-regulated
YPR158W-B	YPR158W-B	Retrotransposon TYA Gag and TYB Pol genes	0.27768	0.34204	Not-significant	2.38957	3.79034e-34	Up-regulated
snR62	snR62	C/D box small nucleolar RNA (snoRNA)	0.275268	0.671041	Not-significant	2.38939	0.000331878	Up-regulated
YER106W	MAM1	Monopolin	0.589286	0.17947	Not-significant	2.38332	9.51237e-05	Up-regulated
tD(GUC)N	tD(GUC)N	Aspartate tRNA (tRNA-Asp), predicted by tRNAscan-SE analysis	-0.860151	0.403032	Not-significant	2.37545	0.0315541	Up-regulated
YFR032C	RRT5	Putative protein of unknown function	-1.16938	0.202281	Not-significant	2.37348	4.19883e-07	Up-regulated
YOR381W-A	YOR381W-A	Putative protein of unknown function	0.0804316	0.963604	Not-significant	2.36914	0.0445221	Up-regulated
YAL067C	SEO1	Putative permease	-1.29293	1.00576e-05	Down-regulated	2.36062	4.76911e-15	Up-regulated
YML056C	IMD4	Inosine monophosphate dehydrogenase	0.341682	0.103058	Not-significant	2.35288	1.10576e-78	Up-regulated
YDR316W-B	YDR316W-B	Retrotransposon TYA Gag and TYB Pol genes	0.367082	0.235149	Not-significant	2.33807	5.11891e-10	Up-regulated
YHR044C	DOG1	2-deoxyglucose-6-phosphate phosphatase	-1.00563	0.00144505	Down-regulated	2.31704	3.01147e-16	Up-regulated
YPL130W	SPO19	Meiosis-specific prospore protein	-0.638883	0.41337	Not-significant	2.30549	0.000785722	Up-regulated
YBR180W	DTR1	Putative dityrosine transporter of the major facilitator superfamily	-1.08422	0.240991	Not-significant	2.2781	0.00204917	Up-regulated
YFL032W	YFL032W	Dubious open reading frame	-1.33527	0.0325492	Down-regulated	2.26155	0.00339438	Up-regulated
YML122C	YML122C	Dubious open reading frame	1.36919	0.0571502	Not-significant	2.23938	0.0220417	Up-regulated
YDR222W	YDR222W	Protein of unknown function	0.294675	0.334243	Not-significant	2.23755	2.1766e-19	Up-regulated
YKL029C	MAE1	Mitochondrial malic enzyme	0.300788	0.235748	Not-significant	2.22279	2.79756e-28	Up-regulated
YNR060W	FRE4	Ferric reductase	0.0430773	0.918948	Not-significant	2.18748	9.71698e-19	Up-regulated
YOR343W-B	YOR343W-B	Retrotransposon TYA Gag and TYB Pol genes	-0.572169	0.00269631	Significant	2.1851	1.29518e-39	Up-regulated
YNL112W	DBP2	ATP-dependent RNA helicase of the DEAD-box protein family	-0.0463135	0.959224	Not-significant	2.17325	5.29429e-27	Up-regulated
YGR079W	YGR079W	Putative protein of unknown function	0.419125	0.0339966	Significant	2.16931	2.01127e-32	Up-regulated
YPR195C	YPR195C	Dubious open reading frame	-0.235011	0.554124	Not-significant	2.1625	2.47953e-07	Up-regulated
YLR410W-B	YLR410W-B	Retrotransposon TYA Gag and TYB Pol genes	-0.449213	0.0928205	Not-significant	2.13494	5.74254e-25	Up-regulated
YJL037W	IRC18	Protein involved in outer spore wall assembly	0.13386	0.747281	Not-significant	2.13101	2.59134e-08	Up-regulated
snR191	snR191	H/ACA box small nucleolar RNA (snoRNA)	-0.230841	0.731958	Not-significant	2.10976	0.000140494	Up-regulated
YKL165C	MCD4	Protein involved in GPI anchor synthesis	-1.25668	2.64239e-09	Down-regulated	2.10368	1.09345e-22	Up-regulated
YBR182C	SMP1	MADS-box transcription factor involved in osmotic stress response	0.102147	0.731822	Not-significant	2.10117	1.05308e-37	Up-regulated
YOR177C	MPC54	Component of the meiotic outer plaque	0.272018	0.209042	Not-significant	2.0976	7.18659e-20	Up-regulated
YDR399W	HPT1	Dimeric hypoxanthine-guanine phosphoribosyltransferase	0.361264	0.126507	Not-significant	2.08992	5.31527e-19	Up-regulated
YOL103W-B	YOL103W-B	Retrotransposon TYA Gag and TYB Pol genes	-0.151113	0.680221	Not-significant	2.08748	2.42789e-24	Up-regulated
YJL034W	KAR2	ATPase involved in protein import into the ER	-1.25979	2.76054e-07	Down-regulated	2.07297	3.02816e-25	Up-regulated
YER138C	YER138C	Retrotransposon TYA Gag and TYB Pol genes	0.00510169	0.984014	Not-significant	2.05982	6.57857e-70	Up-regulated
YDR042C	YDR042C	Putative protein of unknown function	0.278762	0.562433	Not-significant	2.05261	5.58556e-05	Up-regulated
YLL046C	RNP1	Ribonucleoprotein that contains two RNA recognition motifs (RRM)	1.56213	7.51927e-06	Up-regulated	2.04305	0.00319145	Up-regulated
YKL078W	DHR2	Predominantly nucleolar DEAH-box ATP-dependent RNA helicase	0.121792	0.547318	Not-significant	2.0409	3.9665e-61	Up-regulated
YAR010C	YAR010C	Retrotransposon TYA Gag gene co-transcribed with TYB Pol	0.0762234	0.731962	Not-significant	2.03875	1.83855e-05	Up-regulated
YER145C-A	YER145C-A	Dubious open reading frame	-0.0399035	0.970991	Not-significant	2.03651	0.0198472	Up-regulated
YOL160W	YOL160W	Dubious open reading frame	0.464173	0.642604	Not-significant	2.0339	0.0396881	Up-regulated
YLR121C	YPS3	Aspartic protease	0.245276	0.22841	Not-significant	2.02716	1.14454e-37	Up-regulated
YOL124C	TRM11	Catalytic subunit of adoMet-dependent tRNA methyltransferase complex	0.295099	0.170427	Not-significant	2.00924	9.7978e-30	Up-regulated
YBR093C	PHO5	Repressible acid phosphatase	0.574396	0.0146929	Significant	2.00922	1.2889e-31	Up-regulated
YNR053C	NOG2	Putative GTPase	0.188534	0.471376	Not-significant	2.00649	6.57997e-42	Up-regulated
YLR154W-E	YLR154W-E	Dubious open reading frame	0.444833	0.14475	Not-significant	2.0058	1.03319e-12	Up-regulated
YCL064C	CHA1	Catabolic L-serine (L-threonine) deaminase	1.33597	5.26273e-16	Up-regulated	2.00563	5.54673e-16	Up-regulated
YAR031W	PRM9	Pheromone-regulated protein	-0.171284	0.810492	Not-significant	1.99617	0.00194937	Up-regulated
YDR320W-B	YDR320W-B	Dubious open reading frame	-1.36712	0.0923959	Not-significant	1.99143	0.0253991	Up-regulated
YPL027W	SMA1	Protein of unknown function involved in prospore membrane assembly	-0.502913	0.583729	Not-significant	1.99083	0.0175087	Up-regulated
YOR351C	MEK1	Meiosis-specific serine/threonine protein kinase	0.808523	0.144727	Not-significant	1.98629	0.0129167	Up-regulated
YIL053W	RHR2	Constitutively expressed DL-glycerol-3-phosphate phosphatase	0.792258	0.00354165	Significant	1.96961	1.72972e-08	Up-regulated
YHR179W	OYE2	Conserved NADPH oxidoreductase containing flavin mononucleotide (FMN)	0.178911	0.608742	Not-significant	1.96697	6.40273e-27	Up-regulated
YBR114W	RAD16	Nucleotide excision repair (NER) protein	0.572875	1.12006e-05	Significant	1.96655	2.20124e-61	Up-regulated
YBR238C	YBR238C	Mitochondrial membrane protein	0.800865	0.000137806	Significant	1.96408	5.45758e-32	Up-regulated
YJL109C	UTP10	Nucleolar protein	0.00731949	0.986443	Not-significant	1.9565	1.20854e-25	Up-regulated
YHR015W	MIP6	Putative RNA-binding protein	-0.947735	0.00028537	Significant	1.94984	8.63257e-08	Up-regulated
YHR069C-A	YHR069C-A	Dubious open reading frame	-0.771861	0.402882	Not-significant	1.94548	0.0272926	Up-regulated
YGR177C	ATF2	Alcohol acetyltransferase	-1.004	6.70084e-08	Down-regulated	1.94213	2.69839e-24	Up-regulated
YLR180W	SAM1	S-adenosylmethionine synthetase	0.484684	0.183809	Not-significant	1.90998	3.75174e-13	Up-regulated
YNL162W-A	YNL162W-A	Putative protein of unknown function	0.219054	0.688259	Not-significant	1.90721	1.17879e-05	Up-regulated
YBL039C	URA7	Major CTP synthase isozyme (see also URA8)	0.04708	0.858553	Not-significant	1.90538	4.33516e-88	Up-regulated
YMR319C	FET4	Low-affinity Fe(II) transporter of the plasma membrane	0.242563	0.513396	Not-significant	1.90079	5.56209e-11	Up-regulated
YFL031W	HAC1	Basic leucine zipper (bZIP) transcription factor (ATF/CREB1 homolog)	-1.05515	1.64635e-07	Down-regulated	1.89541	1.1229e-30	Up-regulated
YDR098C-B	YDR098C-B	Retrotransposon TYA Gag and TYB Pol genes	0.28521	0.52766	Not-significant	1.89305	0.000485044	Up-regulated
YLR058C	SHM2	Cytosolic serine hydroxymethyltransferase	-0.71848	0.350371	Not-significant	1.89172	6.82499e-05	Up-regulated
YBL107W-A	YBL107W-A	Dubious open reading frame	-1.40838	0.0895782	Not-significant	1.8865	0.0235266	Up-regulated
YOR237W	HES1	Protein implicated in the regulation of ergosterol biosynthesis	0.41271	0.342605	Not-significant	1.88488	9.67245e-06	Up-regulated
YER138W-A	YER138W-A	Putative protein of unknown function	-1.26941	0.00168599	Down-regulated	1.88432	0.00131662	Up-regulated
YJL107C	YJL107C	Putative protein of unknown function	0.0714204	0.810492	Not-significant	1.87915	1.16884e-34	Up-regulated
YLR256W-A	YLR256W-A	Retrotransposon TYA Gag gene co-transcribed with TYB Pol	-0.061619	0.900141	Not-significant	1.87212	4.08106e-24	Up-regulated
YHR184W	SSP1	Protein involved in the control of meiotic nuclear division	-0.142214	0.608742	Not-significant	1.87192	1.85503e-14	Up-regulated
YGL034C	YGL034C	Dubious open reading frame	-0.312406	0.779523	Not-significant	1.86915	0.0476603	Up-regulated
YPL093W	NOG1	Putative GTPase	0.162672	0.420689	Not-significant	1.86588	1.20887e-53	Up-regulated
YGR283C	YGR283C	Putative methyltransferase	0.00696398	0.982921	Not-significant	1.86137	1.17237e-28	Up-regulated
YNL198C	YNL198C	Dubious open reading frame	-0.0430095	0.959529	Not-significant	1.84322	0.00147537	Up-regulated
YMR120C	ADE17	Enzyme of 'de novo' purine biosynthesis	-0.796067	0.351887	Not-significant	1.84298	0.000690477	Up-regulated
YNR012W	URK1	Uridine/cytidine kinase	0.11197	0.44411	Not-significant	1.84112	1.73288e-39	Up-regulated
YJL191W	RPS14B	Protein component of the small (40S) ribosomal subunit	0.305274	0.0148545	Significant	1.83905	5.79853e-50	Up-regulated
YJL152W	YJL152W	Dubious open reading frame	-2.0745	0.00461095	Down-regulated	1.83813	0.0133935	Up-regulated
YJR097W	JJJ3	Protein of unknown function	0.306479	0.214642	Not-significant	1.83241	3.41901e-12	Up-regulated
YLR222C-A	YLR222C-A	Dubious open reading frame	0.124461	0.875478	Not-significant	1.82777	0.000684384	Up-regulated
YLR364W	GRX8	Glutaredoxin that employs a dithiol mechanism of catalysis	-0.779082	1.34609e-05	Significant	1.82523	1.24703e-15	Up-regulated
YMR316W	DIA1	Protein of unknown function	0.113846	0.641566	Not-significant	1.82113	2.07939e-23	Up-regulated
YOL132W	GAS4	1,3-beta-glucanosyltransferase	-0.921905	0.00323065	Significant	1.82008	3.24075e-07	Up-regulated
YOR337W	TEA1	Ty1 enhancer activator involved in Ty enhancer-mediated transcription	0.234357	0.0763921	Not-significant	1.80958	6.453e-51	Up-regulated
YIL023C	YKE4	Zinc transporter	0.398877	0.00598772	Significant	1.80767	5.92328e-41	Up-regulated
YNL095C	YNL095C	Putative protein of unknown function	0.267595	0.0919489	Not-significant	1.80187	2.61158e-12	Up-regulated
YPL088W	YPL088W	Putative aryl alcohol dehydrogenase	0.31211	0.0119271	Significant	1.7998	1.72156e-42	Up-regulated
YLL013C	PUF3	Protein of the mitochondrial outer surface	-0.290125	0.352516	Not-significant	1.79619	2.48734e-16	Up-regulated
YLR432W	IMD3	Inosine monophosphate dehydrogenase	0.0879051	0.770184	Not-significant	1.79186	3.2718e-32	Up-regulated
YLR073C	RFU1	Protein that inhibits Doa4p deubiquitinating activity	0.138389	0.644824	Not-significant	1.78599	2.83193e-23	Up-regulated
YGR159C	NSR1	Nucleolar protein that binds nuclear localization sequences	0.421299	0.0311942	Significant	1.78008	2.39852e-38	Up-regulated
YNL062C	GCD10	Subunit of tRNA (1-methyladenosine) methyltransferase with Gcd14p	-0.141669	0.580083	Not-significant	1.77454	7.97909e-23	Up-regulated
YOL031C	SIL1	Nucleotide exchange factor for the ER lumenal Hsp70 chaperone Kar2p	-1.00158	3.04693e-07	Down-regulated	1.77202	2.41039e-22	Up-regulated
YEL059W	HHY1	Dubious open reading frame unlikely to encode a functional protein	-0.599672	0.401904	Not-significant	1.76567	0.00644235	Up-regulated
YBR084W	MIS1	Mitochondrial C1-tetrahydrofolate synthase	-0.171418	0.558102	Not-significant	1.76094	3.80683e-42	Up-regulated
YKL177W	YKL177W	Dubious open reading frame	-0.170958	0.810961	Not-significant	1.75938	0.000984877	Up-regulated
YPL012W	RRP12	Protein required for export of the ribosomal subunits	0.0217851	0.949499	Not-significant	1.75845	1.47484e-25	Up-regulated
YKR080W	MTD1	NAD-dependent 5,10-methylenetetrahydrafolate dehydrogenase	-0.522734	0.442433	Not-significant	1.75583	1.05968e-05	Up-regulated
YBR142W	MAK5	Essential nucleolar protein	0.296002	0.0954576	Not-significant	1.75255	1.01569e-46	Up-regulated
YIL037C	PRM2	Pheromone-regulated protein	-0.542615	0.516576	Not-significant	1.75083	0.0192261	Up-regulated
YDL063C	YDL063C	Transport adaptor or symportin	0.156193	0.440595	Not-significant	1.75037	1.50494e-22	Up-regulated
YPL198W	RPL7B	Ribosomal 60S subunit protein L7B	0.678571	0.000281742	Significant	1.74944	1.06949e-16	Up-regulated
YKR097W	PCK1	Phosphoenolpyruvate carboxykinase	-0.159965	0.863583	Not-significant	1.74325	2.92451e-12	Up-regulated
YOL055C	THI20	Trifunctional enzyme of thiamine biosynthesis, degradation and salvage	-0.261645	0.374035	Not-significant	1.73643	3.79064e-18	Up-regulated
YLL008W	DRS1	Nucleolar DEAD-box protein required for ribosome assembly and function	0.107807	0.602818	Not-significant	1.73319	1.48495e-53	Up-regulated
YDR034W-B	YDR034W-B	Predicted tail-anchored plasma membrane protein	1.63683	5.43158e-19	Up-regulated	1.73186	2.93565e-09	Up-regulated
YDR184C	ATC1	Nuclear protein	0.113	0.613565	Not-significant	1.72822	6.45008e-28	Up-regulated
YJR129C	YJR129C	S-adenosylmethionine-dependent methyltransferase	-0.00679	0.990693	Not-significant	1.72658	1.79062e-14	Up-regulated
YER163C	YER163C	Gamma-glutamyl cyclotransferase	0.0900996	0.647794	Not-significant	1.72376	4.50732e-37	Up-regulated
YDR398W	UTP5	Subunit of U3-containing Small Subunit (SSU) processome complex	0.163339	0.496874	Not-significant	1.71779	3.03523e-35	Up-regulated
YOL118C	YOL118C	Dubious open reading frame	-0.650085	0.313023	Not-significant	1.71467	0.00436422	Up-regulated
YNL281W	HCH1	Heat shock protein regulator	0.343106	0.0119335	Significant	1.71409	2.28557e-33	Up-regulated
YOR204W	DED1	ATP-dependent DEAD (Asp-Glu-Ala-Asp)-box RNA helicase	0.432253	0.0270413	Significant	1.71174	9.46788e-43	Up-regulated
YBR085W	AAC3	Mitochondrial inner membrane ADP/ATP translocator	0.873769	0.00906951	Significant	1.71133	0.00184235	Up-regulated
tV(AAC)M1	tV(AAC)M1	Valine tRNA (tRNA-Val), predicted by tRNAscan-SE analysis	-0.29407	0.756338	Not-significant	1.70999	0.0270147	Up-regulated
YKR092C	SRP40	Nucleolar serine-rich protein	0.0553815	0.844999	Not-significant	1.70932	5.68068e-55	Up-regulated
YGR090W	UTP22	Component of the small-subunit processome	0.0158619	0.969413	Not-significant	1.70859	3.76181e-17	Up-regulated
YPL025C	YPL025C	Dubious open reading frame	0.0606437	0.945589	Not-significant	1.70839	0.00424593	Up-regulated
YPR150W	YPR150W	Dubious open reading frame	-0.570759	0.455943	Not-significant	1.70423	0.0111713	Up-regulated
YIL079C	AIR1	Zinc knuckle protein	0.155	0.513396	Not-significant	1.70243	9.49925e-30	Up-regulated
YPR194C	OPT2	Oligopeptide transporter	-1.17389	1.28316e-07	Down-regulated	1.70188	1.92017e-19	Up-regulated
YLR462W	YLR462W	Putative protein of unknown function with similarity to helicases	-0.414851	0.586714	Not-significant	1.7014	0.00447723	Up-regulated
YGL183C	MND1	Protein required for recombination and meiotic nuclear division	-0.17798	0.779523	Not-significant	1.69827	0.000905498	Up-regulated
YOR359W	VTS1	Flap-structured DNA-binding and RNA-binding protein	0.0847003	0.691184	Not-significant	1.69349	2.05732e-49	Up-regulated
YCR057C	PWP2	Conserved 90S pre-ribosomal component	0.0275638	0.900426	Not-significant	1.69291	1.07622e-71	Up-regulated
YDR165W	TRM82	Catalytic subunit of a tRNA methyltransferase complex	0.0423712	0.918948	Not-significant	1.69162	2.4346e-12	Up-regulated
YNL124W	NAF1	RNA-binding protein required for the assembly of box H/ACA snoRNPs	0.278984	0.161687	Not-significant	1.68553	9.52493e-42	Up-regulated
YOR360C	PDE2	High-affinity cyclic AMP phosphodiesterase	0.667644	0.00095046	Significant	1.68304	5.08854e-17	Up-regulated
YER056C	FCY2	Purine-cytosine permease	0.42649	0.0102372	Significant	1.67936	1.01006e-29	Up-regulated
YKL068W-A	YKL068W-A	Putative protein of unknown function	0.249893	0.255672	Not-significant	1.67487	8.09272e-23	Up-regulated
YGL120C	PRP43	RNA helicase in the DEAH-box family	0.2075	0.411375	Not-significant	1.67055	3.49159e-36	Up-regulated
YPR158C-D	YPR158C-D	Retrotransposon TYA Gag and TYB Pol genes	-0.118612	0.490977	Not-significant	1.66967	6.5904e-58	Up-regulated
YAL036C	RBG1	Member of the DRG family of GTP-binding proteins	-0.0185125	0.959439	Not-significant	1.66954	1.38955e-33	Up-regulated
YLL035W	GRC3	Polynucleotide kinase present on rDNA	-0.0295456	0.912189	Not-significant	1.6672	3.24601e-25	Up-regulated
YJL200C	ACO2	Putative mitochondrial aconitase isozyme	0.053867	0.895088	Not-significant	1.66575	9.30761e-16	Up-regulated
YPR010C	RPA135	RNA polymerase I second largest subunit A135	0.0947127	0.564888	Not-significant	1.66458	1.4243e-99	Up-regulated
YJL035C	TAD2	Subunit of tRNA-specific adenosine-34 deaminase	-0.794246	2.19e-12	Significant	1.65864	1.76696e-32	Up-regulated
YKL163W	PIR3	O-glycosylated covalently-bound cell wall protein	1.247	1.04624e-13	Up-regulated	1.65657	0.00045654	Up-regulated
YMR217W	GUA1	GMP synthase	0.295474	0.196537	Not-significant	1.65138	2.49292e-42	Up-regulated
YBL071W-A	KTI11	Zn-ribbon protein that co-purifies with Dph1 and Dph2	0.287442	0.342555	Not-significant	1.64754	2.67189e-12	Up-regulated
snR31	snR31	H/ACA box small nucleolar RNA (snoRNA)	0.157077	0.608327	Not-significant	1.64672	1.51507e-14	Up-regulated
YER060W-A	FCY22	Putative purine-cytosine permease	-0.506788	0.164791	Not-significant	1.63171	8.01217e-05	Up-regulated
YBR056W-A	YBR056W-A	Protein of unknown function	0.379452	0.290488	Not-significant	1.63052	1.00061e-06	Up-regulated
YKR015C	YKR015C	Putative protein of unknown function	-2.40921	1.17905e-17	Down-regulated	1.62396	7.07105e-07	Up-regulated
YGL188C-A	YGL188C-A	Putative protein of unknown function	0.289187	0.616723	Not-significant	1.62063	0.00147682	Up-regulated
YCR072C	RSA4	WD-repeat protein involved in ribosome biogenesis	0.0896448	0.727818	Not-significant	1.61777	7.5691e-27	Up-regulated
YJL108C	PRM10	Pheromone-regulated protein	0.129741	0.573991	Not-significant	1.61181	2.59317e-27	Up-regulated
YPR144C	NOC4	Nucleolar protein	0.298039	0.0638138	Not-significant	1.60858	8.37013e-32	Up-regulated
YGR128C	UTP8	Nucleolar protein required for export of tRNAs from the nucleus	-0.0464087	0.886446	Not-significant	1.59983	2.73584e-16	Up-regulated
YLL012W	YEH1	Steryl ester hydrolase	0.722414	2.7293e-11	Significant	1.59547	4.22487e-42	Up-regulated
YML108W	YML108W	Protein of unknown function	0.283257	0.340665	Not-significant	1.59442	1.25825e-09	Up-regulated
YNR063W	YNR063W	Putative zinc-cluster protein of unknown function	0.00507085	0.990693	Not-significant	1.59069	2.53949e-16	Up-regulated
YHR214C-B	YHR214C-B	Retrotransposon TYA Gag and TYB Pol genes	-0.0484265	0.796798	Not-significant	1.58766	9.77883e-36	Up-regulated
YOR318C	YOR318C	Dubious open reading frame	-0.0809364	0.899716	Not-significant	1.57952	0.000501295	Up-regulated
YBR292C	YBR292C	Dubious open reading frame	-0.571002	0.545401	Not-significant	1.57588	0.0291936	Up-regulated
YBR034C	HMT1	Nuclear SAM-dependent mono- and asymmetric methyltransferase	0.502144	0.0190855	Significant	1.56742	3.86967e-23	Up-regulated
YIR012W	SQT1	Protein involved in 60S ribosomal subunit assembly or modification	0.170831	0.441037	Not-significant	1.5631	3.38907e-37	Up-regulated
YPL183C	RTT10	WD40 domain-containing protein involved in endosomal recycling	-0.0165538	0.958169	Not-significant	1.55723	3.53845e-23	Up-regulated
YLR196W	PWP1	Protein with WD-40 repeats involved in rRNA processing	0.119535	0.580083	Not-significant	1.54976	6.19625e-41	Up-regulated
YOR340C	RPA43	RNA polymerase I subunit A43	0.134896	0.483543	Not-significant	1.54873	5.35212e-32	Up-regulated
YHR169W	DBP8	ATPase, putative RNA helicase of the DEAD-box family	0.112222	0.570598	Not-significant	1.54794	1.26602e-27	Up-regulated
YNL248C	RPA49	RNA polymerase I subunit A49	0.0643288	0.810492	Not-significant	1.54114	1.25502e-35	Up-regulated
YMR131C	RRB1	Nuclear protein involved in early steps of ribosome biogenesis	0.222487	0.183582	Not-significant	1.53889	5.59216e-43	Up-regulated
YGR153W	YGR153W	Putative protein of unknown function	0.630162	0.000267556	Significant	1.5388	6.88864e-13	Up-regulated
YBR247C	ENP1	Protein associated with U3 and U14 snoRNAs	0.0936216	0.627475	Not-significant	1.53514	5.21798e-44	Up-regulated
YNL201C	PSY2	Subunit of protein phosphatase PP4 complex	0.343555	0.0724812	Not-significant	1.5324	1.27921e-19	Up-regulated
YHR197W	RIX1	Component of the Rix1 complex and possibly pre-replicative complexes	0.0844149	0.756338	Not-significant	1.53025	4.60017e-15	Up-regulated
YLR223C	IFH1	Coactivator, regulates transcription of ribosomal protein (RP) genes	0.363418	0.0404612	Significant	1.5252	1.11353e-30	Up-regulated
YGL117W	YGL117W	Putative protein of unknown function	-0.0936433	0.76498	Not-significant	1.52427	5.58219e-20	Up-regulated
YGR027W-B	YGR027W-B	Retrotransposon TYA Gag and TYB Pol genes	-0.318369	0.0729319	Not-significant	1.52425	5.97918e-24	Up-regulated
YLR179C	YLR179C	Protein of unknown function with similarity to Tfs1p	-0.00702257	0.985718	Not-significant	1.51699	9.00927e-30	Up-regulated
YML113W	DAT1	DNA binding protein that recognizes oligo(dA).oligo(dT) tracts	0.225869	0.144005	Not-significant	1.51651	2.94045e-33	Up-regulated
YLR341W	SPO77	Meiosis-specific protein of unknown function	0.0633237	0.947544	Not-significant	1.51618	0.0234184	Up-regulated
YJL198W	PHO90	Low-affinity phosphate transporter	0.104197	0.585476	Not-significant	1.51569	3.36421e-23	Up-regulated
YDR101C	ARX1	Nuclear export factor for the ribosomal pre-60S subunit	0.0768319	0.72454	Not-significant	1.51561	1.06835e-39	Up-regulated
YOL104C	NDJ1	Meiosis-specific telomere protein	-0.123945	0.718165	Not-significant	1.51523	1.42814e-09	Up-regulated
YJL043W	YJL043W	Putative protein of unknown function	-0.157099	0.896627	Not-significant	1.51245	0.0429979	Up-regulated
YHR022C	YHR022C	Putative protein of unknown function	1.47086	2.00201e-05	Up-regulated	1.50778	0.00238947	Up-regulated
YGL126W	SCS3	Protein required for inositol prototrophy	-0.519199	0.0130794	Significant	1.50777	5.3567e-20	Up-regulated
YMR049C	ERB1	Constituent of 66S pre-ribosomal particles	0.0847124	0.649768	Not-significant	1.50658	4.69978e-43	Up-regulated
YOL159C-A	YOL159C-A	Protein of unknown function	0.339027	0.280511	Not-significant	1.50431	5.90618e-07	Up-regulated
YHR030C	SLT2	Serine/threonine MAP kinase	0.215174	0.0922102	Not-significant	1.50219	6.73748e-69	Up-regulated
YPL052W	OAZ1	Regulator of ornithine decarboxylase Spe1p	-0.0263674	0.959758	Not-significant	1.50154	1.29072e-11	Up-regulated
YJR054W	YJR054W	Potassium transporter that mediates K+ influx	-0.150656	0.654843	Not-significant	1.49889	1.02633e-14	Up-regulated
YDR055W	PST1	Cell wall protein that contains a putative GPI-attachment site	1.11073	2.49077e-24	Up-regulated	1.49743	1.20537e-65	Up-regulated
YDR098C-A	YDR098C-A	Retrotransposon TYA Gag gene co-transcribed with TYB Pol	0.209643	0.73493	Not-significant	1.49653	0.0213068	Up-regulated
YPL226W	NEW1	ATP binding cassette protein	0.364122	0.0138547	Significant	1.49646	1.84456e-42	Up-regulated
YML043C	RRN11	Component of the core factor (CF) rDNA transcription factor complex	0.460084	0.0160763	Significant	1.49504	2.06139e-12	Up-regulated
YBR295W	PCA1	Cadmium transporting P-type ATPase	0.25621	0.0420174	Significant	1.49103	4.03258e-39	Up-regulated
YOL045W	PSK2	PAS-domain containing serine/threonine protein kinase	0.395245	0.0664778	Not-significant	1.48922	3.82867e-22	Up-regulated
YOR341W	RPA190	RNA polymerase I largest subunit A190	0.101299	0.578059	Not-significant	1.48776	2.39189e-45	Up-regulated
YLR054C	OSW2	Protein of unknown function reputedly involved in spore wall assembly	0.396504	0.145136	Not-significant	1.4857	9.77661e-07	Up-regulated
YIL159W	BNR1	Formin	-0.0526351	0.854602	Not-significant	1.48522	3.08796e-16	Up-regulated
YJL050W	MTR4	ATP-dependent 3'-5' RNA helicase of the DExD/H family	0.055177	0.789417	Not-significant	1.47827	1.45668e-70	Up-regulated
YJL033W	HCA4	DEAD box RNA helicase	0.168662	0.311069	Not-significant	1.47728	5.97679e-38	Up-regulated
YER185W	PUG1	Plasma membrane protein involved in protoprophyrin and heme transport	-0.171473	0.742337	Not-significant	1.47605	7.77129e-06	Up-regulated
YAL012W	CYS3	Cystathionine gamma-lyase	-0.000753256	0.99842	Not-significant	1.47527	1.97569e-16	Up-regulated
YDR021W	FAL1	Nucleolar protein required for maturation of 18S rRNA	0.0888402	0.735149	Not-significant	1.47488	6.42459e-12	Up-regulated
YOL128C	YGK3	Protein kinase related to mammalian GSK-3 glycogen synthase kinases	0.233545	0.155773	Not-significant	1.47397	3.05613e-18	Up-regulated
YLR063W	YLR063W	Methyltransferase required for m3U2843 methylation of the 25S rRNA	0.243666	0.129564	Not-significant	1.47323	2.1842e-19	Up-regulated
YLR409C	UTP21	Subunit of U3-containing 90S preribosome and SSU processome complexes	-0.00930803	0.969413	Not-significant	1.47147	2.84333e-48	Up-regulated
YJR078W	BNA2	Tryptophan 2,3-dioxygenase or indoleamine 2,3-dioxygenase	-1.15971	8.9285e-09	Down-regulated	1.47107	2.02631e-13	Up-regulated
YHR094C	HXT1	Low-affinity glucose transporter of the major facilitator superfamily	0.417613	0.56295	Not-significant	1.46704	0.0366197	Up-regulated
YCL054W	SPB1	AdoMet-dependent methyltransferase	0.209719	0.216058	Not-significant	1.46454	5.07318e-43	Up-regulated
YJL098W	SAP185	Protein that forms a complex with the Sit4p protein phosphatase	0.089479	0.573822	Not-significant	1.46338	3.61325e-46	Up-regulated
YLR303W	MET17	O-acetyl homoserine-O-acetyl serine sulfhydrylase	-1.05179	8.35306e-07	Down-regulated	1.46207	4.83672e-05	Up-regulated
YMR017W	SPO20	Meiosis-specific subunit of the t-SNARE complex	-0.0150999	0.982143	Not-significant	1.46121	9.82092e-06	Up-regulated
YNL132W	KRE33	Protein required for biogenesis of the small ribosomal subunit	-0.0279122	0.904713	Not-significant	1.46085	5.81766e-50	Up-regulated
YDR449C	UTP6	Nucleolar protein	0.0629646	0.882148	Not-significant	1.45997	5.07709e-09	Up-regulated
YOL144W	NOP8	Nucleolar protein required for 60S ribosomal subunit biogenesis	0.0693901	0.754273	Not-significant	1.45773	8.97486e-31	Up-regulated
YIR026C	YVH1	Protein phosphatase	0.258622	0.288524	Not-significant	1.45467	1.44467e-19	Up-regulated
YJR029W	YJR029W	Retrotransposon TYA Gag and TYB Pol genes	-0.0390631	0.859509	Not-significant	1.45083	8.22574e-51	Up-regulated
YIL091C	UTP25	Nucleolar protein	0.215416	0.0371307	Significant	1.44662	3.34525e-45	Up-regulated
YBR141C	YBR141C	Nucleolar S-adenosylmethionine-dependent rRNA methyltransferase	0.402824	0.0377258	Significant	1.44567	1.23642e-16	Up-regulated
YDR324C	UTP4	Subunit of U3-containing 90S preribosome and SSU processome complexes	-0.0309885	0.878871	Not-significant	1.44451	1.23938e-31	Up-regulated
YBR032W	YBR032W	Dubious open reading frame	-0.976181	0.442577	Not-significant	1.443	0.0128951	Up-regulated
YHR196W	UTP9	Nucleolar protein	0.00490906	0.991867	Not-significant	1.44009	4.88768e-09	Up-regulated
YER127W	LCP5	Essential protein involved in maturation of 18S rRNA	0.134222	0.424602	Not-significant	1.43966	3.29615e-40	Up-regulated
YDR261C-D	YDR261C-D	Retrotransposon TYA Gag and TYB Pol genes	0.569882	0.00221356	Significant	1.43865	1.38952e-12	Up-regulated
YAL019W	FUN30	Snf2p family member with ATP-dependent chromatin remodeling activity	-0.109262	0.463945	Not-significant	1.43658	2.78173e-42	Up-regulated
YFL012W	YFL012W	Putative protein of unknown function	-0.97322	0.0174143	Significant	1.43329	0.00120743	Up-regulated
YGR245C	SDA1	Protein required for actin organization and passage through Start	0.204869	0.384165	Not-significant	1.43037	8.60205e-31	Up-regulated
snR42	snR42	H/ACA box small nucleolar RNA (snoRNA)	0.425917	0.190448	Not-significant	1.42868	1.2084e-05	Up-regulated
YOL136C	PFK27	6-phosphofructo-2-kinase	0.49697	0.0245216	Significant	1.42845	2.51119e-10	Up-regulated
YIR028W	DAL4	Allantoin permease	-0.0745264	0.899268	Not-significant	1.42736	0.000284768	Up-regulated
YLR407W	YLR407W	Putative protein of unknown function	0.404817	0.00405661	Significant	1.42488	3.16126e-18	Up-regulated
YKR099W	BAS1	Myb-related transcription factor	0.111638	0.451606	Not-significant	1.4233	6.13543e-45	Up-regulated
YOR242C	SSP2	Sporulation specific protein that localizes to the spore wall	-0.272478	0.590658	Not-significant	1.42247	0.0110017	Up-regulated
YJL159W	HSP150	O-mannosylated heat shock protein	0.197798	0.283849	Not-significant	1.42133	4.4874e-25	Up-regulated
YOR379C	YOR379C	Dubious open reading frame	-0.0493852	0.966179	Not-significant	1.41954	0.0279935	Up-regulated
YJL069C	UTP18	Small-subunit processome protein involved in pre-18S rRNA maturation	0.136911	0.34693	Not-significant	1.41893	5.74778e-26	Up-regulated
YNL182C	IPI3	Component of the Rix1 complex and pre-replicative complexes (pre-RCs)	0.0477433	0.854522	Not-significant	1.41862	5.16665e-25	Up-regulated
YJL148W	RPA34	RNA polymerase I subunit A34.5	0.177452	0.441307	Not-significant	1.41522	6.42666e-15	Up-regulated
YGL230C	YGL230C	Putative protein of unknown function	-0.599752	0.284876	Not-significant	1.41413	0.00518273	Up-regulated
YHR170W	NMD3	Protein involved in nuclear export of the large ribosomal subunit	0.247315	0.210388	Not-significant	1.41287	7.3572e-26	Up-regulated
YPL146C	NOP53	Nucleolar protein	0.184877	0.42457	Not-significant	1.40944	1.28313e-12	Up-regulated
YIL104C	SHQ1	Chaperone protein	0.150086	0.394068	Not-significant	1.40635	5.0252e-25	Up-regulated
YDR060W	MAK21	Constituent of 66S pre-ribosomal particles	0.0560694	0.781462	Not-significant	1.40385	9.80364e-31	Up-regulated
YOR355W	GDS1	Protein of unknown function	-0.246967	0.0166299	Significant	1.40114	1.90186e-30	Up-regulated
YCL058W-A	ADF1	Transcriptional repressor encoded by the FYV5 antisense strand	0.138159	0.597314	Not-significant	1.40072	1.54867e-15	Up-regulated
YOL010W	RCL1	Endonuclease that cleaves pre-rRNA at site A2 for 18S rRNA biogenesis	0.0352131	0.878871	Not-significant	1.39838	2.94299e-32	Up-regulated
YDR210C-D	YDR210C-D	Retrotransposon TYA Gag and TYB Pol genes	0.209867	0.162308	Not-significant	1.39713	4.65057e-32	Up-regulated
YMR300C	ADE4	Phosphoribosylpyrophosphate amidotransferase (PRPPAT)	-0.048186	0.912319	Not-significant	1.39462	1.17633e-13	Up-regulated
YOL080C	REX4	Putative RNA exonuclease	0.0591406	0.810492	Not-significant	1.38777	2.0605e-22	Up-regulated
YGR145W	ENP2	Component of the SSU	0.0958886	0.628469	Not-significant	1.38633	1.50001e-27	Up-regulated
YNR027W	BUD17	Putative pyridoxal kinase	0.155639	0.580083	Not-significant	1.38626	9.54022e-19	Up-regulated
YPL126W	NAN1	U3 snoRNP protein	0.211322	0.212311	Not-significant	1.38618	8.68297e-32	Up-regulated
YJL073W	JEM1	DnaJ-like chaperone required for nuclear membrane fusion during mating	-0.702707	3.46019e-06	Significant	1.3855	8.11067e-19	Up-regulated
YNL313C	EMW1	Essential conserved protein with a role in cell wall integrity	0.0209397	0.926455	Not-significant	1.38384	3.61158e-48	Up-regulated
YJR070C	LIA1	Deoxyhypusine hydroxylase	-0.0460719	0.910256	Not-significant	1.38382	1.30459e-19	Up-regulated
YDL060W	TSR1	Protein required for processing of 20S pre-rRNA in the cytoplasm	0.122708	0.411375	Not-significant	1.38343	9.1831e-56	Up-regulated
YHR014W	SPO13	Meiotic regulator	0.226656	0.744081	Not-significant	1.3813	0.0105653	Up-regulated
YKR024C	DBP7	Putative ATP-dependent RNA helicase of the DEAD-box family	0.224549	0.15204	Not-significant	1.37832	4.60446e-44	Up-regulated
YJL119C	YJL119C	Dubious open reading frame	0.0600478	0.935071	Not-significant	1.37758	0.00733318	Up-regulated
YIL096C	YIL096C	Methyltransferase required for m3U2634 methylation of the 25S rRNA	0.447344	0.0159526	Significant	1.37444	4.31302e-13	Up-regulated
YMR239C	RNT1	Nuclear dsRNA-specific ribonuclease (RNase III)	0.108598	0.56854	Not-significant	1.37102	1.81688e-16	Up-regulated
YLR194C	YLR194C	Structural constituent of the cell wall	-0.0243783	0.947544	Not-significant	1.37029	4.28513e-14	Up-regulated
YGR187C	HGH1	Nonessential protein of unknown function	-0.0308791	0.910144	Not-significant	1.36873	3.53787e-14	Up-regulated
YEL026W	SNU13	RNA binding protein	0.279136	0.170508	Not-significant	1.36782	2.23179e-23	Up-regulated
YKL027W	YKL027W	tRNA threonylcarbamoyladenosine dehydratase	0.0108646	0.974437	Not-significant	1.36734	4.51633e-29	Up-regulated
YKL178C	STE3	Receptor for a factor pheromone	0.0148431	0.975012	Not-significant	1.36653	2.69072e-08	Up-regulated
YDL086C-A	YDL086C-A	Dubious open reading frame	-0.546355	0.397123	Not-significant	1.36568	0.0223494	Up-regulated
YMR122W-A	YMR122W-A	Protein of unknown function	-0.0198874	0.960644	Not-significant	1.36466	5.81097e-16	Up-regulated
YGL171W	ROK1	RNA-dependent ATPase	0.0340821	0.872321	Not-significant	1.36451	1.01666e-37	Up-regulated
YHR085W	IPI1	Component of the Rix1 complex and possibly pre-replicative complexes	0.120247	0.548688	Not-significant	1.36301	7.40998e-17	Up-regulated
YLR301W	HRI1	Protein of unknown function that interacts with Sec72p and Hrr25p	-0.743026	1.08695e-06	Significant	1.36265	2.6939e-20	Up-regulated
YBR267W	REI1	Cytoplasmic pre-60S factor	0.13847	0.568391	Not-significant	1.35848	6.40292e-24	Up-regulated
YLL034C	RIX7	Putative ATPase of the AAA family	0.149372	0.266889	Not-significant	1.35412	1.58414e-44	Up-regulated
YKL023C-A	YKL023C-A	Putative protein of unknown function	-0.145207	0.617042	Not-significant	1.35331	6.35467e-16	Up-regulated
YNR014W	YNR014W	Putative protein of unknown function	1.62674	4.01563e-25	Up-regulated	1.34824	2.66612e-08	Up-regulated
YHR066W	SSF1	Constituent of 66S pre-ribosomal particles	0.121977	0.476381	Not-significant	1.3478	3.58769e-24	Up-regulated
YOR142W-B	YOR142W-B	Retrotransposon TYA Gag and TYB Pol genes	0.0447143	0.859243	Not-significant	1.34737	5.97918e-24	Up-regulated
YHL011C	PRS3	5-phospho-ribosyl-1(alpha)-pyrophosphate synthetase	0.253654	0.156263	Not-significant	1.34698	2.54717e-33	Up-regulated
YPL043W	NOP4	Nucleolar protein	0.0981334	0.700652	Not-significant	1.34651	5.22535e-27	Up-regulated
YDR496C	PUF6	Pumilio-homology domain protein	0.159663	0.426993	Not-significant	1.34616	2.41309e-18	Up-regulated
YNR057C	BIO4	Dethiobiotin synthetase	-0.00930555	0.982913	Not-significant	1.34587	1.5639e-12	Up-regulated
YMR229C	RRP5	RNA binding protein involved in synthesis of both 18S and 5.8S rRNAs	-0.145561	0.515334	Not-significant	1.34572	8.17453e-25	Up-regulated
YGR151C	YGR151C	Dubious open reading frame	0.45214	0.0275273	Significant	1.34082	1.0808e-11	Up-regulated
YLR237W	THI7	Plasma membrane transporter responsible for the uptake of thiamine	0.899671	1.19556e-18	Significant	1.33762	2.53455e-49	Up-regulated
YKL009W	MRT4	Protein involved in mRNA turnover and ribosome assembly	0.0783187	0.79741	Not-significant	1.32906	8.40121e-20	Up-regulated
YJR027W	YJR027W	Retrotransposon TYA Gag and TYB Pol genes	-0.07348	0.706244	Not-significant	1.32756	4.75891e-39	Up-regulated
YGR200C	ELP2	Subunit of Elongator complex	0.0383799	0.830332	Not-significant	1.32608	6.08783e-37	Up-regulated
YMR214W	SCJ1	One of several homologs of bacterial chaperone DnaJ	-0.653397	4.39451e-06	Significant	1.32518	2.89414e-18	Up-regulated
YBL061C	SKT5	Activator of Chs3p (chitin synthase III) during vegetative growth	-0.130317	0.292839	Not-significant	1.31839	4.08597e-44	Up-regulated
YNL024C	YNL024C	Putative methyltransferase	0.405531	0.154838	Not-significant	1.31683	1.3977e-10	Up-regulated
YKL191W	DPH2	Protein required for synthesis of diphthamide	-0.173946	0.342424	Not-significant	1.3168	1.04665e-23	Up-regulated
YOR207C	RET1	Second-largest subunit of RNA polymerase III	-0.0429799	0.844908	Not-significant	1.31589	1.52862e-36	Up-regulated
YNL221C	POP1	Subunit of both RNase MRP and nuclear RNase P	0.240518	0.216988	Not-significant	1.31535	1.01745e-32	Up-regulated
YBL093C	ROX3	Subunit of the RNA polymerase II mediator complex	0.594481	0.00784581	Significant	1.31519	4.62634e-17	Up-regulated
YPL202C	AFT2	Iron-regulated transcriptional activator	0.698043	2.63005e-05	Significant	1.31203	5.7424e-18	Up-regulated
YKL104C	GFA1	Glutamine-fructose-6-phosphate amidotransferase	-0.294124	0.0526182	Not-significant	1.31131	3.03401e-27	Up-regulated
YDR400W	URH1	Uridine nucleosidase (uridine-cytidine N-ribohydrolase)	-0.923071	4.52107e-15	Significant	1.31116	6.97921e-24	Up-regulated
YAL053W	FLC2	Putative calcium channel involved in calcium release under hypotonic	0.239467	0.0472296	Significant	1.30928	3.31138e-46	Up-regulated
YKL162C-A	YKL162C-A	Dubious open reading frame	0.176443	0.759125	Not-significant	1.30776	0.000286146	Up-regulated
YLR222C	UTP13	Nucleolar protein	0.0965167	0.550387	Not-significant	1.30776	3.53171e-27	Up-regulated
YER082C	UTP7	Nucleolar protein	0.191469	0.271684	Not-significant	1.30684	3.70032e-27	Up-regulated
YLR104W	LCL2	Putative protein of unknown function	-0.689986	8.12026e-05	Significant	1.30638	1.81727e-09	Up-regulated
YDL127W	PCL2	Cyclin, interacts with cyclin-dependent kinase Pho85p	-0.169651	0.41944	Not-significant	1.3057	1.4082e-22	Up-regulated
YGR146C	ECL1	Protein of unknown function	0.260509	0.153009	Not-significant	1.30331	1.46376e-21	Up-regulated
YNL186W	UBP10	Ubiquitin-specific protease, deubiquitinates Ub-protein moieties	0.199956	0.212311	Not-significant	1.30262	9.19127e-44	Up-regulated
YLR448W	RPL6B	Ribosomal 60S subunit protein L6B	-0.131685	0.591554	Not-significant	1.30249	8.25313e-27	Up-regulated
YMR128W	ECM16	Essential DEAH-box ATP-dependent RNA helicase specific to U3 snoRNP	0.0880659	0.64583	Not-significant	1.29946	1.05308e-37	Up-regulated
YDR087C	RRP1	Essential evolutionarily conserved nucleolar protein	-0.0891613	0.713882	Not-significant	1.29565	1.75158e-24	Up-regulated
YMR290C	HAS1	ATP-dependent RNA helicase	0.377566	0.0213438	Significant	1.29556	4.35098e-31	Up-regulated
YKL161C	KDX1	Protein kinase	0.112731	0.644489	Not-significant	1.28953	4.13036e-20	Up-regulated
YGL147C	RPL9A	Ribosomal 60S subunit protein L9A	-0.36737	0.0937546	Not-significant	1.28684	8.78362e-28	Up-regulated
YJL133W	MRS3	Iron transporter, mediates Fe2+ transport across inner mito membrane	-0.00955138	0.980476	Not-significant	1.28569	5.35451e-20	Up-regulated
YHR128W	FUR1	Uracil phosphoribosyltransferase	0.107412	0.621352	Not-significant	1.2819	3.26782e-36	Up-regulated
YKR025W	RPC37	RNA polymerase III subunit C37	0.362271	0.0707234	Not-significant	1.27541	1.15306e-16	Up-regulated
YOR012W	YOR012W	Putative protein of unknown function	0.731645	0.00889519	Significant	1.27429	0.000841737	Up-regulated
YGR123C	PPT1	Protein serine/threonine phosphatase	0.0790074	0.767823	Not-significant	1.27339	3.58214e-15	Up-regulated
YNL191W	DUG3	Component of glutamine amidotransferase (GATase II)	0.448523	0.00220377	Significant	1.27289	3.18446e-18	Up-regulated
YBL042C	FUI1	High affinity uridine permease, localizes to the plasma membrane	0.654607	0.0213224	Significant	1.26924	2.3737e-09	Up-regulated
YPL245W	YPL245W	Putative protein of unknown function	-0.0162581	0.966271	Not-significant	1.26771	1.43033e-13	Up-regulated
YER060W	FCY21	Putative purine-cytosine permease	-0.871382	4.3598e-07	Significant	1.26569	2.72378e-06	Up-regulated
YKR013W	PRY2	Sterol binding protein involved in the export of acetylated sterols	0.0435565	0.883613	Not-significant	1.26288	2.81958e-17	Up-regulated
YDL055C	PSA1	GDP-mannose pyrophosphorylase (mannose-1-phosphate guanyltransferase)	-0.131388	0.661546	Not-significant	1.26059	2.72382e-12	Up-regulated
YNL187W	SWT21	Protein involved in mRNA splicing	0.453964	0.0306862	Significant	1.25997	3.51583e-12	Up-regulated
YOL141W	PPM2	AdoMet-dependent tRNA methyltransferase	-0.0449785	0.899268	Not-significant	1.25524	8.83696e-15	Up-regulated
YOR339C	UBC11	Ubiquitin-conjugating enzyme	-0.229634	0.703742	Not-significant	1.25465	0.00393349	Up-regulated
YIL072W	HOP1	Meiosis-specific protein required for chromosome synapsis	-0.21322	0.576933	Not-significant	1.25441	4.02459e-07	Up-regulated
YCR073C	SSK22	MAP kinase kinase kinase of HOG1 mitogen-activated signaling pathway	0.398086	0.00493998	Significant	1.25395	1.77485e-32	Up-regulated
YFL003C	MSH4	Protein involved in meiotic recombination	0.250794	0.45813	Not-significant	1.25393	1.43151e-05	Up-regulated
YNL175C	NOP13	Nucleolar protein found in preribosomal complexes	0.0403561	0.890315	Not-significant	1.25037	8.28795e-31	Up-regulated
YOR294W	RRS1	Essential protein that binds ribosomal protein L11	0.113692	0.687405	Not-significant	1.25024	1.17147e-15	Up-regulated
YMR184W	ADD37	Protein of unknown function	-0.689517	0.000684588	Significant	1.24677	1.12399e-11	Up-regulated
YBL055C	YBL055C	3'-->5' exonuclease and endonuclease with a possible role in apoptosis	0.0684043	0.737311	Not-significant	1.24527	6.55941e-24	Up-regulated
YHR069C	RRP4	Exosome non-catalytic core component	0.317539	0.0591124	Not-significant	1.24441	1.64845e-21	Up-regulated
YLR074C	BUD20	C2H2-type zinc finger protein required for ribosome assembly	0.506687	0.00839511	Significant	1.23584	3.39648e-18	Up-regulated
YNL277W	MET2	L-homoserine-O-acetyltransferase	0.066744	0.900868	Not-significant	1.23573	9.7937e-05	Up-regulated
YOR013W	IRC11	Dubious open reading frame	0.954016	2.34209e-06	Significant	1.2338	3.82589e-05	Up-regulated
YGR103W	NOP7	Component of several different pre-ribosomal particles	0.063873	0.801913	Not-significant	1.23052	1.71286e-18	Up-regulated
YGR191W	HIP1	High-affinity histidine permease	0.341403	0.0207786	Significant	1.22991	1.36767e-25	Up-regulated
YLR333C	RPS25B	Protein component of the small (40S) ribosomal subunit	-0.0977119	0.686776	Not-significant	1.22627	1.57828e-31	Up-regulated
YHR148W	IMP3	Component of the SSU processome	0.149245	0.580083	Not-significant	1.22601	4.02463e-16	Up-regulated
YCR087C-A	YCR087C-A	Putative protein of unknown function	0.332131	0.154093	Not-significant	1.22574	7.77372e-16	Up-regulated
YLR226W	BUR2	Cyclin for the Sgv1p (Bur1p) protein kinase	0.197947	0.397618	Not-significant	1.22571	1.08218e-10	Up-regulated
YPL110C	GDE1	Glycerophosphocholine (GroPCho) phosphodiesterase	0.113569	0.565826	Not-significant	1.22468	7.67533e-28	Up-regulated
YER006W	NUG1	GTPase that associates with nuclear 60S pre-ribosomes	0.063877	0.736606	Not-significant	1.22359	3.72266e-41	Up-regulated
YLR030W	YLR030W	Putative protein of unknown function	0.626566	0.000461774	Significant	1.22338	9.27365e-06	Up-regulated
YER110C	KAP123	Karyopherin beta	-0.111258	0.412219	Not-significant	1.21925	8.24948e-53	Up-regulated
YGL157W	ARI1	NADPH-dependent aldehyde reductase	0.245831	0.311041	Not-significant	1.21823	1.02212e-12	Up-regulated
YBR155W	CNS1	TPR-containing co-chaperone	0.246684	0.224998	Not-significant	1.21666	4.74339e-16	Up-regulated
YGL234W	ADE5,7	Enzyme of the 'de novo' purine nucleotide biosynthetic pathway	-0.334648	0.24251	Not-significant	1.21608	1.56039e-12	Up-regulated
YGL194C-A	YGL194C-A	Putative protein of unknown function	-0.355498	0.44411	Not-significant	1.2155	0.000158514	Up-regulated
YGL111W	NSA1	Constituent of 66S pre-ribosomal particles	0.0163009	0.947137	Not-significant	1.21413	4.95587e-27	Up-regulated
YHR070W	TRM5	tRNA(m(1)G37)methyltransferase	0.431779	0.0241044	Significant	1.21273	1.39844e-18	Up-regulated
YMR309C	NIP1	eIF3c subunit of the eukaryotic translation initiation factor 3 (eIF3)	-0.0792267	0.810236	Not-significant	1.20931	5.3659e-10	Up-regulated
YKR056W	TRM2	tRNA methyltransferase	0.101192	0.583362	Not-significant	1.20834	5.92304e-33	Up-regulated
YAL040C	CLN3	G1 cyclin involved in cell cycle progression	0.371824	0.00206099	Significant	1.20786	1.15026e-52	Up-regulated
YBR271W	YBR271W	S-adenosylmethionine-dependent methyltransferase	0.0698999	0.745179	Not-significant	1.20774	3.04704e-17	Up-regulated
YDR489W	SLD5	Subunit of the GINS complex (Sld5p, Psf1p, Psf2p, Psf3p)	0.223449	0.212311	Not-significant	1.20704	1.73579e-14	Up-regulated
YPR112C	MRD1	Essential conserved small ribosomal subunit (40s) synthesis factor	0.122859	0.511668	Not-significant	1.20243	9.097e-29	Up-regulated
YML133C	YML133C	Putative Y' element ATP-dependent helicase	-0.730941	0.580083	Not-significant	1.20152	0.00899472	Up-regulated
YOR343C	YOR343C	Dubious open reading frame	-0.967328	0.000112819	Significant	1.19968	1.04214e-06	Up-regulated
YIL073C	SPO22	Meiosis-specific protein essential for chromosome synapsis	0.304575	0.198095	Not-significant	1.1994	5.61906e-05	Up-regulated
YDR465C	RMT2	Arginine N5 methyltransferase	0.299143	0.140593	Not-significant	1.19839	1.4104e-20	Up-regulated
YER045C	ACA1	ATF/CREB family basic leucine zipper (bZIP) transcription factor	0.961024	2.06055e-10	Significant	1.1974	3.44618e-12	Up-regulated
YOR004W	UTP23	Component of the small subunit processome	0.175644	0.465773	Not-significant	1.1973	2.57134e-16	Up-regulated
YOR091W	TMA46	Protein of unknown function that associates with translating ribosomes	0.080475	0.692421	Not-significant	1.19453	1.22956e-25	Up-regulated
YKL205W	LOS1	Nuclear pore protein	-0.176415	0.371531	Not-significant	1.19451	3.92814e-10	Up-regulated
YJR063W	RPA12	RNA polymerase I subunit A12.2	0.000393782	0.999499	Not-significant	1.19341	2.90241e-14	Up-regulated
YGR161C-D	YGR161C-D	Retrotransposon TYA Gag and TYB Pol genes	-0.00801818	0.990901	Not-significant	1.19285	2.52409e-06	Up-regulated
YKR081C	RPF2	Essential protein involved in rRNA maturation and ribosomal assembly	-0.0642925	0.787888	Not-significant	1.19277	1.20522e-22	Up-regulated
YDR299W	BFR2	Component of the SSU and 90S preribosomes	-0.121062	0.427465	Not-significant	1.19116	1.49648e-19	Up-regulated
YCL043C	PDI1	Protein disulfide isomerase	-0.807077	1.00836e-05	Significant	1.19091	5.57744e-14	Up-regulated
YOR095C	RKI1	Ribose-5-phosphate ketol-isomerase	-0.326432	0.0393592	Significant	1.19054	1.54493e-23	Up-regulated
YJR041C	URB2	Protein required for normal metabolism of the rRNA primary transcript	-0.182289	0.632329	Not-significant	1.19048	1.86638e-05	Up-regulated
YMR018W	YMR018W	Putative protein of unknown function with similarity to human PEX5Rp	-0.315266	0.461426	Not-significant	1.19022	0.000289889	Up-regulated
YER052C	HOM3	Aspartate kinase (L-aspartate 4-P-transferase)	0.152457	0.243253	Not-significant	1.18686	6.31502e-36	Up-regulated
YLR129W	DIP2	Nucleolar protein	0.0661811	0.734012	Not-significant	1.18669	3.95844e-23	Up-regulated
YMR013C	SEC59	Dolichol kinase	-0.460579	0.0612581	Not-significant	1.18505	2.06765e-06	Up-regulated
YER167W	BCK2	Serine/threonine-rich protein involved in PKC1 signaling pathway	0.051806	0.74203	Not-significant	1.18472	2.93491e-29	Up-regulated
YDR091C	RLI1	Essential Fe-S protein	-0.0769921	0.698066	Not-significant	1.18334	1.42075e-21	Up-regulated
YOR056C	NOB1	Protein involved in proteasomal and 40S ribosomal subunit biogenesis	0.138229	0.560056	Not-significant	1.18315	3.43364e-25	Up-regulated
YKL143W	LTV1	Component of the GSE complex	0.126766	0.614847	Not-significant	1.18014	6.7268e-20	Up-regulated
YNR026C	SEC12	Guanine nucleotide exchange factor (GEF)	0.0628373	0.808422	Not-significant	1.17949	2.0605e-22	Up-regulated
YBR135W	CKS1	Cyclin-dependent protein kinase regulatory subunit and adaptor	-0.484201	0.0196434	Significant	1.17828	1.85124e-10	Up-regulated
YHL001W	RPL14B	Ribosomal 60S subunit protein L14B	-0.158431	0.43269	Not-significant	1.1773	3.3926e-23	Up-regulated
YML093W	UTP14	Subunit of U3-containing Small Subunit (SSU) processome complex	0.129237	0.454361	Not-significant	1.17314	2.5852e-38	Up-regulated
YGR189C	CRH1	Chitin transglycosylase	0.147187	0.285496	Not-significant	1.17079	4.54084e-27	Up-regulated
YLR175W	CBF5	Pseudouridine synthase catalytic subunit of box H/ACA snoRNPs	0.0973689	0.693227	Not-significant	1.16975	3.42266e-26	Up-regulated
YGL204C	YGL204C	Protein of unknown function	-0.52547	0.161505	Not-significant	1.16806	0.000233364	Up-regulated
YKR079C	TRZ1	tRNA 3'-end processing endonuclease tRNase Z	0.0817546	0.707708	Not-significant	1.16636	1.70966e-22	Up-regulated
YDR120C	TRM1	tRNA methyltransferase	-0.0125746	0.966179	Not-significant	1.1661	7.28093e-20	Up-regulated
YGR038C-B	YGR038C-B	Retrotransposon TYA Gag and TYB Pol genes	0.0912553	0.745509	Not-significant	1.16093	6.31177e-16	Up-regulated
YHR174W	ENO2	Enolase II, a phosphopyruvate hydratase	-0.0485271	0.882148	Not-significant	1.16065	2.96703e-13	Up-regulated
YLR401C	DUS3	Dihydrouridine synthase	0.256524	0.246828	Not-significant	1.15866	2.79544e-23	Up-regulated
YMR296C	LCB1	Component of serine palmitoyltransferase	0.332298	0.06577	Not-significant	1.15508	5.4047e-19	Up-regulated
YER037W	PHM8	Lysophosphatidic acid (LPA) phosphatase, nucleotidase	1.18423	3.07951e-38	Up-regulated	1.15401	3.44618e-12	Up-regulated
YKL024C	URA6	Uridylate kinase	0.0169605	0.966271	Not-significant	1.15314	3.99054e-12	Up-regulated
YNR038W	DBP6	Essential protein involved in ribosome biogenesis	0.0295232	0.90407	Not-significant	1.15228	8.17459e-24	Up-regulated
YPR125W	YLH47	Mitochondrial inner membrane protein	0.0147126	0.963604	Not-significant	1.15016	5.5131e-24	Up-regulated
YOR300W	YOR300W	Dubious open reading frame	-0.167088	0.77635	Not-significant	1.14885	0.00145788	Up-regulated
YAR009C	YAR009C	Retrotransposon TYA Gag and TYB Pol genes	-0.237422	0.258457	Not-significant	1.1474	1.44652e-17	Up-regulated
YGL179C	TOS3	Protein kinase	-0.610574	0.00350104	Significant	1.14709	1.39184e-09	Up-regulated
YJL208C	NUC1	Major mitochondrial nuclease	-0.102605	0.713955	Not-significant	1.14668	7.16326e-22	Up-regulated
YNR066C	YNR066C	Putative membrane-localized protein of unknown function	0.528159	0.035696	Significant	1.146	6.1989e-09	Up-regulated
YDR234W	LYS4	Homoaconitase	-0.036693	0.919995	Not-significant	1.14482	1.50227e-11	Up-regulated
YGL078C	DBP3	RNA-Dependent ATPase, member of DExD/H-box family	0.164351	0.493219	Not-significant	1.14403	3.52939e-25	Up-regulated
YFL034C-A	RPL22B	Ribosomal 60S subunit protein L22B	0.418787	0.0162135	Significant	1.14352	2.1116e-11	Up-regulated
YIL141W	YIL141W	Dubious open reading frame	-0.292106	0.739366	Not-significant	1.14177	0.0316112	Up-regulated
YMR306W	FKS3	Protein involved in spore wall assembly	0.354383	0.0788348	Not-significant	1.14152	3.9758e-07	Up-regulated
YHR052W	CIC1	Essential protein that interacts with proteasome components	0.161643	0.376986	Not-significant	1.14067	8.02516e-16	Up-regulated
YHR040W	BCD1	Essential protein required for the accumulation of box C/D snoRNA	0.137542	0.501669	Not-significant	1.13763	4.70787e-14	Up-regulated
YOR283W	YOR283W	Phosphatase with a broad substrate specificity	0.570493	0.000281445	Significant	1.13731	1.25488e-21	Up-regulated
YPR137W	RRP9	Protein involved in pre-rRNA processing	0.0254562	0.923351	Not-significant	1.13675	1.75039e-22	Up-regulated
YOR234C	RPL33B	Ribosomal 60S subunit protein L33B	-0.0554059	0.849262	Not-significant	1.13651	3.00708e-22	Up-regulated
YPR060C	ARO7	Chorismate mutase	-0.140614	0.43841	Not-significant	1.13544	1.25434e-13	Up-regulated
YMR040W	YET2	Protein of unknown function that may interact with ribosomes	-0.781489	0.0492924	Significant	1.13525	0.000235775	Up-regulated
YMR093W	UTP15	Nucleolar protein	0.00331764	0.990901	Not-significant	1.13445	1.71265e-22	Up-regulated
YDL229W	SSB1	Cytoplasmic ATPase that is a ribosome-associated molecular chaperone	0.0832637	0.792347	Not-significant	1.13392	6.68079e-20	Up-regulated
YJL056C	ZAP1	Zinc-regulated transcription factor	-0.620621	5.14013e-08	Significant	1.13302	2.58011e-14	Up-regulated
YGR161C	RTS3	Putative component of the protein phosphatase type 2A complex	0.524639	0.00318173	Significant	1.13235	4.09165e-11	Up-regulated
YHR020W	YHR020W	Prolyl-tRNA synthetase	-0.176507	0.272169	Not-significant	1.13047	1.19154e-32	Up-regulated
YJL212C	OPT1	Proton-coupled oligopeptide transporter of the plasma membrane	0.503473	0.207362	Not-significant	1.12813	0.00415565	Up-regulated
YGR081C	SLX9	Protein required for pre-rRNA processing	0.00491894	0.986913	Not-significant	1.12719	2.6338e-14	Up-regulated
YOR272W	YTM1	Constituent of 66S pre-ribosomal particles	0.127234	0.48981	Not-significant	1.12654	9.24012e-21	Up-regulated
YDR261C	EXG2	Exo-1,3-beta-glucanase	-0.0145026	0.956583	Not-significant	1.12546	6.12756e-30	Up-regulated
YMR185W	YMR185W	Protein required for the nuclear import and biogenesis of RNA pol II	-0.166126	0.597804	Not-significant	1.12516	8.08455e-09	Up-regulated
YDL205C	HEM3	Porphobilinogen deaminase	-0.344543	0.162807	Not-significant	1.12502	4.1576e-17	Up-regulated
YOR145C	PNO1	Essential nucleolar protein required for pre-18S rRNA processing	0.147417	0.526594	Not-significant	1.12344	4.03022e-19	Up-regulated
YLR336C	SGD1	Essential nuclear protein	0.0721547	0.705862	Not-significant	1.12306	4.46124e-18	Up-regulated
YAL025C	MAK16	Essential nuclear protein	0.172261	0.390349	Not-significant	1.12173	5.21047e-20	Up-regulated
YDR249C	YDR249C	Putative protein of unknown function	-0.140537	0.767823	Not-significant	1.12037	3.45594e-05	Up-regulated
NME1	NME1	RNA component of RNase MRP	-0.0744604	0.900426	Not-significant	1.11654	0.0112046	Up-regulated
YHL033C	RPL8A	Ribosomal 60S subunit protein L8A	0.347683	0.168104	Not-significant	1.11315	4.1641e-10	Up-regulated
YLL038C	ENT4	Protein of unknown function	0.013956	0.964097	Not-significant	1.11257	8.55861e-11	Up-regulated
YOR309C	YOR309C	Dubious open reading frame	-0.0715866	0.892571	Not-significant	1.11158	1.50376e-05	Up-regulated
YPR175W	DPB2	Second largest subunit of DNA polymerase II (DNA polymerase epsilon)	-0.183858	0.235748	Not-significant	1.1106	5.35051e-21	Up-regulated
YDL148C	NOP14	Nucleolar protein	0.0943471	0.550804	Not-significant	1.11043	1.30289e-15	Up-regulated
YDR395W	SXM1	Nuclear transport factor (karyopherin)	0.0451969	0.837366	Not-significant	1.10825	9.44891e-15	Up-regulated
YNR044W	AGA1	Anchorage subunit of a-agglutinin of a-cells	-0.493298	0.0253137	Significant	1.10603	3.27657e-07	Up-regulated
YPR035W	GLN1	Glutamine synthetase (GS)	0.563402	0.00598772	Significant	1.10534	4.58998e-12	Up-regulated
YER132C	PMD1	Protein with an N-terminal kelch-like domain	0.159729	0.429844	Not-significant	1.10472	1.49648e-19	Up-regulated
YNL078W	NIS1	Protein localized in the bud neck at G2/M phase	-0.070673	0.755273	Not-significant	1.10395	2.85452e-09	Up-regulated
YGR280C	PXR1	Essential protein involved in rRNA and snoRNA maturation	0.386182	0.133592	Not-significant	1.10314	3.02997e-10	Up-regulated
YPR085C	ASA1	Subunit of the ASTRA complex, involved in chromatin remodeling	-0.0875385	0.713955	Not-significant	1.10286	1.46205e-19	Up-regulated
YMR014W	BUD22	Protein required for rRNA maturation and ribosomal subunit biogenesis	0.0364507	0.87903	Not-significant	1.10186	1.15976e-15	Up-regulated
YDL051W	LHP1	RNA binding protein required for maturation of tRNA and U6 snRNA	-0.154824	0.483213	Not-significant	1.10061	1.86658e-15	Up-regulated
YDR195W	REF2	RNA-binding protein	-0.206974	0.192883	Not-significant	1.09872	2.20613e-20	Up-regulated
YDR321W	ASP1	Cytosolic L-asparaginase, involved in asparagine catabolism	-0.465673	0.00082846	Significant	1.09702	9.27981e-22	Up-regulated
YIL019W	FAF1	Protein required for pre-rRNA processing	0.0554891	0.843686	Not-significant	1.09586	1.25722e-12	Up-regulated
YPR116W	RRG8	Putative protein of unknown function	-0.389443	0.240388	Not-significant	1.09424	0.000248797	Up-regulated
YCR035C	RRP43	Exosome non-catalytic core component	0.18317	0.217021	Not-significant	1.09405	5.24101e-23	Up-regulated
YOL041C	NOP12	Nucleolar protein involved in pre-25S rRNA processing	0.105933	0.713123	Not-significant	1.09307	5.51869e-12	Up-regulated
YPL212C	PUS1	tRNA:pseudouridine synthase	0.26059	0.0517375	Not-significant	1.09286	2.95218e-27	Up-regulated
YDR340W	YDR340W	Putative protein of unknown function	-0.162415	0.823839	Not-significant	1.0896	0.016891	Up-regulated
YBL035C	POL12	B subunit of DNA polymerase alpha-primase complex	-0.0909372	0.687315	Not-significant	1.08942	1.03994e-15	Up-regulated
YGR155W	CYS4	Cystathionine beta-synthase	0.237931	0.225613	Not-significant	1.08898	2.39432e-24	Up-regulated
YGR162W	TIF4631	Translation initiation factor eIF4G	0.0423951	0.851258	Not-significant	1.08632	2.46661e-27	Up-regulated
YOR020C	HSP10	Mitochondrial matrix co-chaperonin	0.481843	0.0024178	Significant	1.08594	1.78612e-12	Up-regulated
YGR040W	KSS1	Mitogen-activated protein kinase (MAPK)	-0.285843	0.137458	Not-significant	1.08592	1.90585e-13	Up-regulated
YOR116C	RPO31	RNA polymerase III largest subunit C160	-0.0707042	0.746648	Not-significant	1.08474	4.57791e-27	Up-regulated
YBR172C	SMY2	GYF domain protein	-0.174022	0.146296	Not-significant	1.08416	9.51732e-39	Up-regulated
YDL133C-A	RPL41B	Ribosomal 60S subunit protein L41B	-0.446863	0.017697	Significant	1.08381	7.59469e-12	Up-regulated
YAL059W	ECM1	Pre-ribosomal factor involved in 60S ribosomal protein subunit export	0.22993	0.34204	Not-significant	1.0828	1.2187e-14	Up-regulated
YGL215W	CLG1	Cyclin-like protein that interacts with Pho85p	0.102483	0.60343	Not-significant	1.08005	1.315e-19	Up-regulated
YMR308C	PSE1	Karyopherin/importin that interacts with the nuclear pore complex	0.00879608	0.968282	Not-significant	1.07968	3.901e-22	Up-regulated
YJL125C	GCD14	Subunit of tRNA (1-methyladenosine) methyltransferase	0.0753727	0.645087	Not-significant	1.07967	2.56604e-27	Up-regulated
YDR037W	KRS1	Lysyl-tRNA synthetase	0.440929	0.0149665	Significant	1.07736	6.65287e-21	Up-regulated
YER169W	RPH1	JmjC domain-containing histone demethylase	0.440234	0.00241792	Significant	1.07447	5.33898e-17	Up-regulated
YLR003C	CMS1	Putative subunit of the 90S preribosome processome complex	-0.014656	0.961126	Not-significant	1.07148	1.83382e-09	Up-regulated
YLR031W	YLR031W	Putative protein of unknown function	0.68266	0.0223633	Significant	1.06912	0.00156339	Up-regulated
YGR152C	RSR1	GTP-binding protein of the Ras superfamily	0.439429	0.0231189	Significant	1.06816	2.09872e-14	Up-regulated
YDR157W	YDR157W	Dubious open reading frame	0.0767242	0.85509	Not-significant	1.06814	2.35497e-05	Up-regulated
YJR094C	IME1	Master regulator of meiosis that is active only during meiotic events	-0.443802	0.204055	Not-significant	1.06814	0.0005058	Up-regulated
YKL181W	PRS1	5-phospho-ribosyl-1(alpha)-pyrophosphate synthetase	0.0502813	0.825487	Not-significant	1.06778	3.32806e-25	Up-regulated
YNL270C	ALP1	Arginine transporter	0.127931	0.591199	Not-significant	1.06608	7.91835e-08	Up-regulated
YER137C	YER137C	Putative protein of unknown function	0.269282	0.424143	Not-significant	1.06356	2.76184e-05	Up-regulated
YBR023C	CHS3	Chitin synthase III	-0.057475	0.800464	Not-significant	1.05671	1.71257e-16	Up-regulated
YDL082W	RPL13A	Ribosomal 60S subunit protein L13A	-0.114773	0.690802	Not-significant	1.05651	2.81564e-21	Up-regulated
YJL190C	RPS22A	Protein component of the small (40S) ribosomal subunit	-0.294167	0.189742	Not-significant	1.05399	3.83229e-20	Up-regulated
YLR342W	FKS1	Catalytic subunit of 1,3-beta-D-glucan synthase	0.147789	0.517946	Not-significant	1.05214	1.55656e-12	Up-regulated
YPR007C	REC8	Meiosis-specific component of sister chromatid cohesion complex	0.718452	1.28374e-07	Significant	1.05188	2.94071e-06	Up-regulated
YLR293C	GSP1	Ran GTPase	0.0736911	0.794604	Not-significant	1.05135	2.27005e-16	Up-regulated
YPL030W	TRM44	tRNA(Ser) Um(44) 2'-O-methyltransferase	0.0960263	0.58447	Not-significant	1.05112	4.38587e-16	Up-regulated
YOR236W	DFR1	Dihydrofolate reductase involved in tetrahydrofolate biosynthesis	-0.670279	0.000174022	Significant	1.04808	7.13602e-10	Up-regulated
YLR009W	RLP24	Essential protein required for ribosomal large subunit biogenesis	0.15784	0.393084	Not-significant	1.04514	3.96955e-22	Up-regulated
YOR310C	NOP58	Protein involved in producing mature rRNAs and snoRNAs	0.0562028	0.801484	Not-significant	1.04212	2.026e-23	Up-regulated
YER126C	NSA2	Protein constituent of 66S pre-ribosomal particles	0.0670764	0.73493	Not-significant	1.03656	6.07712e-21	Up-regulated
YOR192C-C	YOR192C-C	Putative protein of unknown function	-0.390665	0.421757	Not-significant	1.03435	0.019621	Up-regulated
YDL111C	RRP42	Exosome non-catalytic core component	0.128992	0.409607	Not-significant	1.03304	2.09938e-26	Up-regulated
snR4	snR4	C/D box small nucleolar RNA (snoRNA) but not shown to be active	0.440541	0.217021	Not-significant	1.03183	0.0010253	Up-regulated
YLL057C	JLP1	Fe(II)-dependent sulfonate/alpha-ketoglutarate dioxygenase	0.563948	0.0800155	Not-significant	1.02897	0.00755248	Up-regulated
YJL116C	NCA3	Protein involved in mitochondrion organization	1.53269	1.35197e-29	Up-regulated	1.02433	2.81134e-13	Up-regulated
YDR527W	RBA50	Protein involved in transcription	0.478617	7.84178e-05	Significant	1.0214	2.29092e-13	Up-regulated
YLL011W	SOF1	Protein required for biogenesis of 40S (small) ribosomal subunit	0.0283788	0.887153	Not-significant	1.02074	1.76685e-22	Up-regulated
YDL167C	NRP1	Putative RNA binding protein of unknown function	0.0792051	0.602952	Not-significant	1.02006	6.01687e-28	Up-regulated
YLR014C	PPR1	Zinc finger transcription factor	0.212507	0.122102	Not-significant	1.01988	4.97063e-17	Up-regulated
YLR449W	FPR4	Peptidyl-prolyl cis-trans isomerase (PPIase)	0.0541378	0.774817	Not-significant	1.0192	2.9835e-24	Up-regulated
YCL027W	FUS1	Membrane protein localized to the shmoo tip	-1.03792	4.27523e-07	Down-regulated	1.01861	0.00723861	Up-regulated
YKL073W	LHS1	Molecular chaperone of the endoplasmic reticulum lumen	-0.827758	2.40078e-10	Significant	1.01781	3.22634e-19	Up-regulated
YLR035C-A	YLR035C-A	Retrotransposon TYA Gag and TYB Pol genes	-0.24686	0.447958	Not-significant	1.01657	4.13047e-07	Up-regulated
YOR051C	ETT1	Nuclear protein that inhibits replication of Brome mosaic virus	0.318073	0.0269013	Significant	1.01646	3.68385e-18	Up-regulated
YGR258C	RAD2	Single-stranded DNA endonuclease	0.346374	0.0109133	Significant	1.01543	1.42969e-14	Up-regulated
YJR151C	DAN4	Cell wall mannoprotein	-1.00647	7.13472e-07	Down-regulated	1.01537	2.66789e-07	Up-regulated
YHR203C	RPS4B	Protein component of the small (40S) ribosomal subunit	-0.223431	0.2667	Not-significant	1.01517	3.04533e-20	Up-regulated
YNL163C	RIA1	Cytoplasmic GTPase/eEF2-like factor involved in ribosomal biogenesis	0.342872	0.0774023	Not-significant	1.01352	2.76072e-17	Up-regulated
YKL201C	MNN4	Putative positive regulator of mannosylphosphate transferase Mnn6p	-0.478514	4.0405e-05	Significant	1.01195	2.50908e-11	Up-regulated
YER036C	ARB1	ATPase of the ATP-binding cassette (ABC) family	0.351752	0.0108003	Significant	1.01184	9.60281e-23	Up-regulated
YDL160C	DHH1	Cytoplasmic DExD/H-box helicase, stimulates mRNA decapping	-0.358466	0.0077607	Significant	1.0105	2.15252e-12	Up-regulated
YPR110C	RPC40	RNA polymerase subunit AC40	0.0487349	0.837366	Not-significant	1.01029	1.05358e-15	Up-regulated
YML018C	YML018C	Protein of unknown function	0.0401847	0.893659	Not-significant	1.00946	1.55656e-12	Up-regulated
YKL086W	SRX1	Sulfiredoxin	1.01	0.000283692	Up-regulated	1.00906	0.000645463	Up-regulated
YNL207W	RIO2	Essential serine kinase involved in the processing of 20S pre-rRNA	-0.0653563	0.680221	Not-significant	1.00897	1.22288e-14	Up-regulated
YNL119W	NCS2	Protein required for uridine thiolation of Lys(UUU) and Glu(UUC) tRNAs	-0.0360946	0.901193	Not-significant	1.00677	2.21506e-05	Up-regulated
YMR230W	RPS10B	Protein component of the small (40S) ribosomal subunit	-0.213269	0.272169	Not-significant	1.00457	3.65135e-23	Up-regulated
YLR040C	YLR040C	MATalpha-specific a-factor blocker	0.247285	0.267744	Not-significant	1.00419	1.11684e-05	Up-regulated
YPR190C	RPC82	RNA polymerase III subunit C82	-0.315897	0.000206243	Significant	1.00415	5.77441e-25	Up-regulated
YPR080W	TEF1	Translational elongation factor EF-1 alpha	0.150429	0.516241	Not-significant	1.00345	1.62312e-14	Up-regulated
YML096W	YML096W	Putative protein with similarity to asparagine synthetases	0.00932325	0.97298	Not-significant	1.00113	4.9425e-16	Up-regulated
YMR194W	RPL36A	Ribosomal 60S subunit protein L36A	-0.087006	0.782361	Not-significant	1.00101	5.33561e-13	Up-regulated
YDL122W	UBP1	Ubiquitin-specific protease	0.225381	0.0904166	Not-significant	0.999447	1.10405e-25	Significant
YDL031W	DBP10	Putative ATP-dependent RNA helicase of the DEAD-box protein family	0.0770069	0.701682	Not-significant	0.998665	5.29218e-23	Significant
YGR264C	MES1	Methionyl-tRNA synthetase	-0.0225258	0.916303	Not-significant	0.997665	4.30683e-17	Significant
YNL069C	RPL16B	Ribosomal 60S subunit protein L16B	-0.257013	0.214036	Not-significant	0.996182	3.37137e-17	Significant
YLR296W	YLR296W	Dubious open reading frame	-2.10136	0.000303837	Down-regulated	0.996153	0.0412145	Significant
YLR249W	YEF3	Translation elongation factor 3	0.298534	0.0824787	Not-significant	0.993829	3.38687e-22	Significant
YNR046W	TRM112	Protein involved in methylation of tRNA, rRNA, and translation factors	-0.145252	0.574339	Not-significant	0.990104	5.32274e-12	Significant
YNL123W	NMA111	Serine protease and general molecular chaperone	0.278974	0.0778278	Not-significant	0.990065	1.51947e-21	Significant
YLR017W	MEU1	Methylthioadenosine phosphorylase (MTAP)	0.254524	0.22111	Not-significant	0.987036	2.66766e-12	Significant
YBR181C	RPS6B	Protein component of the small (40S) ribosomal subunit	-0.26286	0.197803	Not-significant	0.985136	4.67824e-20	Significant
YBR004C	GPI18	Functional ortholog of human PIG-V	0.060126	0.891062	Not-significant	0.984227	0.0263739	Significant
YOL007C	CSI2	Protein of unknown function	-0.0772044	0.715719	Not-significant	0.984054	1.49767e-17	Significant
YBL081W	YBL081W	Non-essential protein of unknown function	0.0961456	0.667579	Not-significant	0.982061	2.84673e-15	Significant
YDL235C	YPD1	Osmotic stress-responsive phosphorelay intermediate sensor protein	-0.334665	0.07575	Not-significant	0.980844	1.74561e-10	Significant
YBL024W	NCL1	S-adenosyl-L-methionine-dependent tRNA: m5C-methyltransferase	-0.0705717	0.733527	Not-significant	0.979493	3.49593e-21	Significant
YBR002C	RER2	Cis-prenyltransferase involved in dolichol synthesis	-0.19604	0.307183	Not-significant	0.976973	1.31846e-10	Significant
YJL010C	NOP9	Essential subunit of U3-containing 90S preribosome	0.00820925	0.972979	Not-significant	0.976453	4.72062e-11	Significant
YMR182C	RGM1	Putative zinc finger DNA binding transcription factor	0.92465	1.39882e-06	Significant	0.97606	2.14996e-09	Significant
YIL127C	RRT14	Putative protein of unknown function	0.156953	0.557382	Not-significant	0.974997	2.14471e-08	Significant
YGR148C	RPL24B	Ribosomal 60S subunit protein L24B	-0.272081	0.212857	Not-significant	0.974693	2.10226e-16	Significant
YOR342C	YOR342C	Protein of unknown function	0.0728169	0.760061	Not-significant	0.974529	4.6611e-12	Significant
YLR419W	YLR419W	Putative helicase with limited sequence similarity to human Rb protein	-0.0405044	0.87207	Not-significant	0.974386	1.47233e-14	Significant
RUF5-2	RUF5-2	RNA of Unknown Function	0.439475	0.0951758	Not-significant	0.974039	4.11977e-05	Significant
YPL089C	RLM1	MADS-box transcription factor	0.276866	0.0232141	Significant	0.973009	1.71923e-18	Significant
YKL106W	AAT1	Mitochondrial aspartate aminotransferase	-0.220539	0.100866	Not-significant	0.972146	4.63098e-14	Significant
YJR119C	JHD2	JmjC domain family histone demethylase	0.312764	0.0778278	Not-significant	0.971044	1.2989e-13	Significant
YDR518W	EUG1	Protein disulfide isomerase of the endoplasmic reticulum lumen	-0.861623	8.30446e-06	Significant	0.971012	4.40945e-08	Significant
YLR023C	IZH3	Membrane protein involved in zinc ion homeostasis	0.428902	0.00010451	Significant	0.968099	8.09694e-34	Significant
YLR186W	EMG1	Methyltransferase for rRNA	0.0339244	0.898819	Not-significant	0.967874	3.33577e-17	Significant
YPL256C	CLN2	G1 cyclin involved in regulation of the cell cycle	0.106136	0.585476	Not-significant	0.967642	5.43213e-19	Significant
YLR264W	RPS28B	Protein component of the small (40S) ribosomal subunit	-0.0342413	0.920792	Not-significant	0.967494	5.01002e-16	Significant
YBL097W	BRN1	Subunit of the condensin complex	-0.31154	0.175464	Not-significant	0.96366	2.30832e-08	Significant
YNL113W	RPC19	RNA polymerase subunit AC19	0.0221222	0.947544	Not-significant	0.961752	1.2287e-11	Significant
YLR318W	EST2	Reverse transcriptase subunit of the telomerase holoenzyme	0.050352	0.895459	Not-significant	0.961676	0.000129759	Significant
YNL053W	MSG5	Dual-specificity protein phosphatase	0.106981	0.433647	Not-significant	0.961148	2.69739e-17	Significant
YLR397C	AFG2	ATPase of the CDC48/PAS1/SEC18 (AAA) family, forms a hexameric complex	0.189122	0.216988	Not-significant	0.96057	4.76686e-16	Significant
YGL028C	SCW11	Cell wall protein with similarity to glucanases	0.31036	0.328905	Not-significant	0.960404	2.25538e-06	Significant
YBR191W-A	YBR191W-A	Dubious open reading frame	-0.505911	0.0646358	Not-significant	0.960048	0.000340052	Significant
YGR085C	RPL11B	Ribosomal 60S subunit protein L11B	-0.194543	0.359279	Not-significant	0.958419	1.96636e-14	Significant
YLR044C	PDC1	Major of three pyruvate decarboxylase isozymes	0.50669	0.000211089	Significant	0.957341	1.38337e-09	Significant
YPL221W	FLC1	Putative FAD transporter	0.327726	0.01237	Significant	0.956509	6.66778e-19	Significant
YEL055C	POL5	DNA Polymerase phi	-0.0229274	0.936101	Not-significant	0.955507	1.94375e-13	Significant
YDL014W	NOP1	Histone glutamine methyltransferase, modifies H2A at Q105 in nucleolus	0.120359	0.643211	Not-significant	0.955437	3.78237e-15	Significant
YDR447C	RPS17B	Ribosomal protein 51 (rp51) of the small (40s) subunit	-0.285632	0.100866	Not-significant	0.954001	5.72689e-21	Significant
YBR106W	PHO88	Probable membrane protein	0.430089	0.0822694	Not-significant	0.953157	8.08455e-09	Significant
YFR042W	KEG1	Integral membrane protein of the ER	-0.776882	0.00112	Significant	0.953157	4.88048e-05	Significant
YJL136C	RPS21B	Protein component of the small (40S) ribosomal subunit	-0.255539	0.17513	Not-significant	0.952599	2.18021e-15	Significant
YCR043C	YCR043C	Putative protein of unknown function	-0.368239	0.0185957	Significant	0.951736	3.38992e-10	Significant
YNR015W	SMM1	Dihydrouridine synthase	-0.0895455	0.619628	Not-significant	0.951043	2.13212e-11	Significant
YDR365C	ESF1	Nucleolar protein involved in pre-rRNA processing	0.122386	0.550897	Not-significant	0.95079	2.78019e-16	Significant
YCR016W	YCR016W	Putative protein of unknown function	0.0519291	0.83222	Not-significant	0.950723	1.27189e-14	Significant
YFL050C	ALR2	Probable Mg(2+) transporter	0.327405	0.011795	Significant	0.950144	2.95488e-18	Significant
YOR071C	NRT1	High-affinity nicotinamide riboside transporter	-0.636304	7.58528e-06	Significant	0.948572	1.27295e-14	Significant
YOR389W	YOR389W	Putative protein of unknown function	0.719228	3.2862e-08	Significant	0.94806	1.69275e-07	Significant
YLR388W	RPS29A	Protein component of the small (40S) ribosomal subunit	-0.32831	0.0610015	Not-significant	0.947909	9.86715e-23	Significant
YLR385C	SWC7	Protein of unknown function	-0.081276	0.870496	Not-significant	0.947082	0.0015433	Significant
YJR145C	RPS4A	Protein component of the small (40S) ribosomal subunit	-0.232544	0.27464	Not-significant	0.946297	1.94865e-16	Significant
YHR088W	RPF1	Protein involved in assembly and export of the large ribosomal subunit	0.116236	0.56295	Not-significant	0.945355	1.31371e-11	Significant
YHR003C	YHR003C	tRNA threonylcarbamoyladenosine dehydratase	0.0722802	0.758996	Not-significant	0.945154	1.88384e-16	Significant
YGL194C	HOS2	Histone deacetylase and subunit of Set3 and Rpd3L complexes	-0.372484	0.145737	Not-significant	0.945151	0.000117514	Significant
YEL047C	YEL047C	Soluble fumarate reductase	-0.178584	0.345337	Not-significant	0.943766	1.05957e-14	Significant
YCL044C	MGR1	Subunit of the mitochondrial (mt) i-AAA protease supercomplex	-0.615046	1.29453e-06	Significant	0.943747	7.4996e-09	Significant
YER086W	ILV1	Threonine deaminase, catalyzes first step in isoleucine biosynthesis	0.286552	0.183809	Not-significant	0.942968	1.99539e-15	Significant
YDR039C	ENA2	P-type ATPase sodium pump	0.0195938	0.928491	Not-significant	0.942224	8.63795e-17	Significant
YDR075W	PPH3	Catalytic subunit of protein phosphatase PP4 complex	0.221785	0.264283	Not-significant	0.941986	8.61926e-09	Significant
YPL217C	BMS1	GTPase required for ribosomal subunit synthesis and rRNA processing	0.0783533	0.684571	Not-significant	0.940713	1.80956e-23	Significant
YBR048W	RPS11B	Protein component of the small (40S) ribosomal subunit	-0.293605	0.0859183	Not-significant	0.94027	9.59862e-15	Significant
YKR106W	GEX2	Proton:glutathione antiporter	0.0740058	0.911126	Not-significant	0.935999	0.0445184	Significant
YHR209W	CRG1	S-AdoMet-dependent methyltransferase involved in lipid homeostasis	0.480123	0.00230744	Significant	0.935875	4.97326e-20	Significant
YOR190W	SPR1	Sporulation-specific exo-1,3-beta-glucanase	-0.724833	0.0156448	Significant	0.935526	0.00357695	Significant
YAL029C	MYO4	Type V myosin motor involved in actin-based transport of cargos	0.191529	0.32221	Not-significant	0.93514	9.06784e-13	Significant
YKL031W	YKL031W	Dubious open reading frame	0.152549	0.81185	Not-significant	0.934523	0.0222793	Significant
YLR185W	RPL37A	Ribosomal 60S subunit protein L37A	-0.22451	0.292905	Not-significant	0.929948	7.67317e-12	Significant
YIL109C	SEC24	Component of the Sec23p-Sec24p heterodimer of the COPII vesicle coat	-0.406886	0.00230744	Significant	0.929875	3.18963e-14	Significant
YKL072W	STB6	Protein that binds Sin3p in a two-hybrid assay	-0.042138	0.899716	Not-significant	0.929526	3.2991e-07	Significant
YLR435W	TSR2	Protein with a potential role in pre-rRNA processing	0.0424007	0.881682	Not-significant	0.926359	5.91549e-12	Significant
YIL069C	RPS24B	Protein component of the small (40S) ribosomal subunit	-0.18198	0.450549	Not-significant	0.925922	1.17018e-11	Significant
YEL054C	RPL12A	Ribosomal 60S subunit protein L12A	-0.125245	0.70004	Not-significant	0.925665	1.35715e-13	Significant
YOR206W	NOC2	Protein involved in ribosome biogenesis	-0.0791358	0.768743	Not-significant	0.925596	6.62337e-08	Significant
YHR010W	RPL27A	Ribosomal 60S subunit protein L27A	-0.235856	0.244021	Not-significant	0.925555	9.55095e-25	Significant
YDR213W	UPC2	Sterol regulatory element binding protein	0.0572527	0.847103	Not-significant	0.924698	4.31308e-09	Significant
YDR448W	ADA2	Transcription coactivator	-0.21951	0.327181	Not-significant	0.924404	1.83973e-05	Significant
YLR234W	TOP3	DNA Topoisomerase III	-0.421741	0.0346645	Significant	0.924347	1.60746e-08	Significant
YBR186W	PCH2	Hexameric ring ATPase that remodels chromosome axis protein Hop1p	0.138211	0.783299	Not-significant	0.92384	0.00907686	Significant
YLR452C	SST2	GTPase-activating protein for Gpa1p	-0.435726	0.119792	Not-significant	0.923201	1.71301e-07	Significant
YDR366C	YDR366C	Putative protein of unknown function	0.0488614	0.844666	Not-significant	0.921813	1.71422e-11	Significant
YOR168W	GLN4	Glutamine tRNA synthetase	0.0647324	0.746648	Not-significant	0.921467	1.51247e-21	Significant
YDR123C	INO2	Transcription factor	-0.727807	2.75484e-05	Significant	0.921095	1.84714e-08	Significant
YKR091W	SRL3	GTB motif (G1/S transcription factor binding) containing protein	0.265006	0.210804	Not-significant	0.920643	1.31843e-07	Significant
YDL191W	RPL35A	Ribosomal 60S subunit protein L35A	-0.237118	0.376986	Not-significant	0.920234	5.56816e-14	Significant
YDL153C	SAS10	Subunit of U3-containing Small Subunit (SSU) processome complex	0.165432	0.325631	Not-significant	0.919188	3.72889e-15	Significant
YHR204W	MNL1	Alpha-1,2-specific exomannosidase of the endoplasmic reticulum	-0.00851382	0.973538	Not-significant	0.917762	5.90441e-18	Significant
YMR132C	JLP2	Protein of unknown function	0.328454	0.137458	Not-significant	0.917191	1.21805e-05	Significant
YLR197W	NOP56	Essential evolutionarily-conserved nucleolar protein	-0.03675	0.872682	Not-significant	0.916093	1.67679e-12	Significant
YBR213W	MET8	Bifunctional dehydrogenase and ferrochelatase	-0.294427	0.175111	Not-significant	0.91374	3.85675e-06	Significant
YOL091W	SPO21	Component of the meiotic outer plaque of the spindle pole body	0.204878	0.613793	Not-significant	0.910345	0.0013588	Significant
YPR102C	RPL11A	Ribosomal 60S subunit protein L11A	-0.167315	0.533821	Not-significant	0.909694	1.3229e-13	Significant
YPR124W	CTR1	High-affinity copper transporter of the plasma membrane	-0.328551	0.271797	Not-significant	0.908844	0.0401811	Significant
YLR343W	GAS2	1,3-beta-glucanosyltransferase	0.320149	0.135531	Not-significant	0.90759	1.21805e-05	Significant
YGR097W	ASK10	Component of RNA polymerase II holoenzyme	0.338447	0.000422018	Significant	0.907285	2.89414e-18	Significant
YOR224C	RPB8	RNA polymerase subunit ABC14.5	-0.237283	0.376809	Not-significant	0.905619	5.67473e-10	Significant
YJL011C	RPC17	RNA polymerase III subunit C17	-0.244268	0.224789	Not-significant	0.902995	3.16212e-09	Significant
YJL122W	ALB1	Shuttling pre-60S factor	0.118985	0.680221	Not-significant	0.901295	2.41875e-10	Significant
YBR259W	YBR259W	Protein of unknown function	-0.127467	0.708738	Not-significant	0.901163	4.36905e-05	Significant
YLR344W	RPL26A	Ribosomal 60S subunit protein L26A	-0.207416	0.352134	Not-significant	0.900128	8.38956e-12	Significant
YLL045C	RPL8B	Ribosomal 60S subunit protein L8B	-0.248338	0.275448	Not-significant	0.899446	9.05306e-16	Significant
YLR347C	KAP95	Karyopherin beta	-0.067091	0.691184	Not-significant	0.897794	8.04216e-24	Significant
YMR259C	YMR259C	Protein that interacts with Trm7p for 2'-O-methylation of C32 of subs	-0.0223013	0.959529	Not-significant	0.897669	4.09639e-05	Significant
YDL201W	TRM8	Noncatalytic subunit of a tRNA methyltransferase complex	-0.070407	0.731962	Not-significant	0.897106	1.92388e-15	Significant
YDR083W	RRP8	Nucleolar S-adenosylmethionine-dependent rRNA methyltransferase	0.15031	0.42109	Not-significant	0.896717	8.16649e-11	Significant
YGL135W	RPL1B	Ribosomal 60S subunit protein L1B	-0.231985	0.222816	Not-significant	0.895735	7.81465e-21	Significant
YML121W	GTR1	Cytoplasmic GTPase	0.532314	1.50204e-05	Significant	0.894993	9.31428e-11	Significant
YLR007W	NSE1	Component of the SMC5-SMC6 complex	0.491903	0.00290571	Significant	0.892911	1.30183e-08	Significant
YPL266W	DIM1	Essential 18S rRNA dimethylase (dimethyladenosine transferase)	0.226844	0.202779	Not-significant	0.891335	5.84676e-10	Significant
YML080W	DUS1	Dihydrouridine synthase	0.125183	0.463869	Not-significant	0.8912	4.76351e-14	Significant
YIL108W	YIL108W	Putative metalloendopeptidase	-0.278946	0.0151306	Significant	0.891019	2.27767e-11	Significant
YJR124C	YJR124C	Putative protein of unknown function	-0.111251	0.459757	Not-significant	0.890014	1.798e-10	Significant
YBR158W	AMN1	Protein required for daughter cell separation	-0.61541	0.00245382	Significant	0.889987	2.38761e-07	Significant
YDL213C	NOP6	rRNA-binding protein required for 40S ribosomal subunit biogenesis	0.126691	0.645382	Not-significant	0.889731	1.01865e-06	Significant
YLR244C	MAP1	Methionine aminopeptidase	0.320552	0.00504024	Significant	0.8895	1.33725e-19	Significant
YOR134W	BAG7	Rho GTPase activating protein (RhoGAP)	0.403397	0.0767929	Not-significant	0.889168	1.39032e-07	Significant
YOR390W	YOR390W	Protein involved in fluoride export	-0.280945	0.406325	Not-significant	0.889117	0.000896783	Significant
YLR276C	DBP9	DEAD-box protein required for 27S rRNA processing	0.0805745	0.628775	Not-significant	0.887862	3.73786e-10	Significant
YLR278C	YLR278C	Zinc-cluster protein	0.113463	0.627475	Not-significant	0.887438	9.08818e-12	Significant
YBL033C	RIB1	GTP cyclohydrolase II	0.419518	0.0382202	Significant	0.885882	7.72788e-08	Significant
YBR187W	GDT1	Protein of unknown function involved in calcium homeostasis	0.23414	0.318492	Not-significant	0.885482	2.73256e-11	Significant
YDR461W	MFA1	Mating pheromone a-factor	-0.24354	0.414987	Not-significant	0.884585	0.000308287	Significant
YML063W	RPS1B	Ribosomal protein 10 (rp10) of the small (40S) subunit	-0.230731	0.275679	Not-significant	0.883279	8.52416e-14	Significant
YLR107W	REX3	RNA exonuclease	0.654822	8.85699e-06	Significant	0.882026	1.03781e-10	Significant
YLR061W	RPL22A	Ribosomal 60S subunit protein L22A	-0.147024	0.60343	Not-significant	0.881664	5.71145e-11	Significant
YBR154C	RPB5	RNA polymerase subunit ABC27	0.033361	0.87207	Not-significant	0.881597	3.91821e-17	Significant
YMR310C	YMR310C	Putative methyltransferase	0.0901364	0.709408	Not-significant	0.880974	3.85586e-11	Significant
YPL179W	PPQ1	Protein phosphatase that regulates the mating response	-0.0144838	0.966179	Not-significant	0.879656	1.9573e-10	Significant
YLR002C	NOC3	Subunit of a nuclear complex with Noc2p and pre-replicative complexes	0.0466095	0.8369	Not-significant	0.879241	1.31221e-11	Significant
YBL068W	PRS4	5-phospho-ribosyl-1(alpha)-pyrophosphate synthetase, synthesizes PRPP	-0.207439	0.0702165	Not-significant	0.87703	7.65025e-19	Significant
YBR239C	ERT1	Transcriptional regulator	0.28656	0.058122	Not-significant	0.876783	3.9357e-10	Significant
YBL004W	UTP20	Component of the small-subunit (SSU) processome	-0.147369	0.602404	Not-significant	0.875696	2.90447e-07	Significant
YDR064W	RPS13	Protein component of the small (40S) ribosomal subunit	-0.0961191	0.735476	Not-significant	0.874589	4.66907e-14	Significant
YGR054W	YGR054W	Eukaryotic initiation factor (eIF) 2A	0.141965	0.355188	Not-significant	0.873045	4.04005e-24	Significant
YBR261C	TAE1	AdoMet-dependent proline methyltransferase	-0.05159	0.898819	Not-significant	0.872792	3.17521e-07	Significant
YDL150W	RPC53	RNA polymerase III subunit C53	0.0285951	0.912375	Not-significant	0.872501	9.14569e-19	Significant
YER088C	DOT6	Protein involved in rRNA and ribosome biogenesis	0.294778	0.151849	Not-significant	0.872242	1.48955e-08	Significant
YJR055W	HIT1	Protein involved in C/D snoRNP assembly	-0.000201757	0.999827	Not-significant	0.870322	9.42555e-05	Significant
YHL036W	MUP3	Low affinity methionine permease	-0.50491	0.228879	Not-significant	0.869683	0.0155313	Significant
YGL169W	SUA5	Protein involved in threonylcarbamoyl adenosine biosynthesis	0.116214	0.614258	Not-significant	0.86883	1.40055e-07	Significant
YOR288C	MPD1	Member of the protein disulfide isomerase (PDI) family	-1.19122	3.17479e-10	Down-regulated	0.868527	9.23477e-07	Significant
YGL036W	YGL036W	Putative protein of unknown function	0.10943	0.706178	Not-significant	0.868396	7.24115e-08	Significant
YHR052W-A	YHR052W-A	Dubious open reading frame	0.481555	0.0390468	Significant	0.867218	0.00680568	Significant
YDR144C	MKC7	GPI-anchored aspartyl protease	-0.849466	1.78846e-14	Significant	0.866939	3.46418e-10	Significant
YNL096C	RPS7B	Protein component of the small (40S) ribosomal subunit	-0.13848	0.4813	Not-significant	0.866918	4.712e-20	Significant
YLR130C	ZRT2	Low-affinity zinc transporter of the plasma membrane	-0.269999	0.00275692	Significant	0.866415	7.9083e-16	Significant
YBR189W	RPS9B	Protein component of the small (40S) ribosomal subunit	-0.273059	0.202296	Not-significant	0.864936	3.50016e-14	Significant
YLR106C	MDN1	Huge dynein-related AAA-type ATPase (midasin)	0.0723474	0.8366	Not-significant	0.86443	5.17959e-10	Significant
YOR287C	RRP36	Component of 90S preribosomes	0.155175	0.219427	Not-significant	0.864058	1.74264e-13	Significant
YNL054W-B	YNL054W-B	TyB Gag-Pol protein	-1.08895	4.66045e-19	Down-regulated	0.863118	2.87027e-08	Significant
YOR034C	AKR2	Ankyrin repeat-containing protein	0.301309	0.0395699	Significant	0.861894	1.33943e-09	Significant
YKR050W	TRK2	Component of the Trk1p-Trk2p potassium transport system	-0.2774	0.0516803	Not-significant	0.861755	1.30112e-10	Significant
YLR048W	RPS0B	Protein component of the small (40S) ribosomal subunit	-0.210608	0.341769	Not-significant	0.861025	9.53726e-14	Significant
YNR058W	BIO3	7,8-diamino-pelargonic acid aminotransferase (DAPA)	0.232316	0.299442	Not-significant	0.860707	1.25272e-06	Significant
YCR018C-A	YCR018C-A	Putative protein of unknown function	-0.0036958	0.99548	Not-significant	0.860445	0.00750398	Significant
YKR042W	UTH1	Mitochondrial inner membrane protein	0.199434	0.255071	Not-significant	0.860177	7.66302e-13	Significant
YPL079W	RPL21B	Ribosomal 60S subunit protein L21B	-0.229126	0.269298	Not-significant	0.859513	3.31381e-16	Significant
YHR124W	NDT80	Meiosis-specific transcription factor	-0.225538	0.451606	Not-significant	0.856266	0.000139629	Significant
YPL057C	SUR1	Mannosylinositol phosphorylceramide (MIPC) synthase catalytic subunit	0.14429	0.304972	Not-significant	0.856174	4.98457e-18	Significant
YJR094W-A	RPL43B	Ribosomal 60S subunit protein L43B	-0.264183	0.261446	Not-significant	0.855687	2.47921e-07	Significant
YPL249C-A	RPL36B	Ribosomal 60S subunit protein L36B	-0.317889	0.127065	Not-significant	0.855448	2.06932e-12	Significant
YAL039C	CYC3	Cytochrome c heme lyase (holocytochrome c synthase)	0.671753	1.95686e-05	Significant	0.855273	1.09099e-08	Significant
YNL075W	IMP4	Component of the SSU processome	0.0459581	0.850262	Not-significant	0.855108	2.13698e-10	Significant
YKR044W	UIP5	Protein of unknown function that interacts with Ulp1p	-0.0636072	0.835077	Not-significant	0.854939	1.08051e-08	Significant
YOR144C	ELG1	Subunit of an alternative replication factor C complex	-0.20839	0.295819	Not-significant	0.854805	3.19826e-09	Significant
YGR036C	CAX4	Dolichyl pyrophosphate (Dol-P-P) phosphatase	0.367544	0.1078	Not-significant	0.852495	1.02327e-06	Significant
YFL023W	BUD27	Unconventional prefoldin protein involved in translation initiation	0.0782516	0.697845	Not-significant	0.852417	1.1809e-13	Significant
YFL045C	SEC53	Phosphomannomutase	-0.722506	7.64395e-07	Significant	0.851707	1.858e-11	Significant
YGL076C	RPL7A	Ribosomal 60S subunit protein L7A	-0.441163	0.0235292	Significant	0.850928	4.25499e-14	Significant
YML116W	ATR1	Multidrug efflux pump of the major facilitator superfamily	-0.00235679	0.995466	Not-significant	0.849638	1.71132e-07	Significant
YJL052W	TDH1	Glyceraldehyde-3-phosphate dehydrogenase (GAPDH), isozyme 1	0.727922	5.13593e-06	Significant	0.846575	8.77683e-06	Significant
YMR042W	ARG80	Transcription factor involved in regulating arginine-responsive genes	0.158959	0.518961	Not-significant	0.846262	4.57679e-07	Significant
YIL067C	YIL067C	Uncharacterized protein of unknown function	0.148265	0.305142	Not-significant	0.845377	7.48518e-12	Significant
YMR242C	RPL20A	Ribosomal 60S subunit protein L20A	-0.186412	0.379994	Not-significant	0.844368	1.56173e-13	Significant
YGL178W	MPT5	mRNA-binding protein of the PUF family	0.201389	0.470771	Not-significant	0.844332	0.000103174	Significant
YPL193W	RSA1	Protein involved in the assembly of 60S ribosomal subunits	0.180126	0.276917	Not-significant	0.84306	4.06092e-10	Significant
YLR120C	YPS1	Aspartic protease	-0.316986	0.00567068	Significant	0.84288	8.66022e-10	Significant
YGL148W	ARO2	Bifunctional chorismate synthase and flavin reductase	-0.450473	0.0151119	Significant	0.841918	1.83389e-11	Significant
YPL137C	GIP3	Cytoplasmic protein that regulates protein phosphatase 1 Glc7p	0.487823	6.7096e-06	Significant	0.841492	4.83687e-14	Significant
YAL038W	CDC19	Pyruvate kinase	0.334129	0.0370327	Significant	0.840748	4.15745e-09	Significant
YOR335C	ALA1	Cytoplasmic and mitochondrial alanyl-tRNA synthetase	0.0576834	0.783982	Not-significant	0.840662	1.16199e-24	Significant
YGR109C	CLB6	B-type cyclin involved in DNA replication during S phase	-0.0229546	0.975852	Not-significant	0.840174	0.0129202	Significant
YNL162W	RPL42A	Ribosomal 60S subunit protein L42A	-0.215894	0.348443	Not-significant	0.839911	3.13876e-10	Significant
YLL062C	MHT1	S-methylmethionine-homocysteine methyltransferase	-0.114884	0.66875	Not-significant	0.838697	1.40959e-06	Significant
YER056C-A	RPL34A	Ribosomal 60S subunit protein L34A	-0.256519	0.265171	Not-significant	0.837508	2.22149e-10	Significant
YOL040C	RPS15	Protein component of the small (40S) ribosomal subunit	-0.223479	0.337023	Not-significant	0.835579	4.50745e-12	Significant
YLR243W	YLR243W	Putative GTPase with a role in biogenesis of RNA pol II and polIII	0.0978378	0.666564	Not-significant	0.834448	2.92597e-09	Significant
YML028W	TSA1	Thioredoxin peroxidase	-0.764372	0.00119898	Significant	0.833754	4.49519e-05	Significant
YOR264W	DSE3	Daughter cell-specific protein, may help establish daughter fate	-0.0754675	0.850262	Not-significant	0.831975	3.66568e-05	Significant
YKL090W	CUE2	Protein of unknown function	-0.0901712	0.719198	Not-significant	0.831455	2.02332e-07	Significant
YDR025W	RPS11A	Protein component of the small (40S) ribosomal subunit	-0.206422	0.396088	Not-significant	0.830605	1.87091e-11	Significant
YOL061W	PRS5	5-phospho-ribosyl-1(alpha)-pyrophosphate synthetase	0.000384759	0.999084	Not-significant	0.829497	2.65959e-11	Significant
YDR012W	RPL4B	Ribosomal 60S subunit protein L4B	-0.121787	0.655568	Not-significant	0.82892	2.13542e-10	Significant
YMR010W	YMR010W	Putative protein of unknown function	0.0689691	0.827484	Not-significant	0.82768	7.75955e-05	Significant
YPR183W	DPM1	Dolichol phosphate mannose (Dol-P-Man) synthase of the ER membrane	-0.511979	0.00323126	Significant	0.826746	2.45877e-07	Significant
YDR384C	ATO3	Plasma membrane protein, putative ammonium transporter	0.204209	0.295134	Not-significant	0.825822	8.5272e-08	Significant
YKL014C	URB1	Protein required for the normal accumulation of 25S and 5.8S rRNAs	-0.280516	0.249924	Not-significant	0.824733	0.00021553	Significant
YJL080C	SCP160	Essential RNA-binding G protein effector of mating response pathway	-0.161264	0.298311	Not-significant	0.823873	5.26661e-13	Significant
YDL112W	TRM3	2'-O-ribose methyltransferase	-0.190139	0.366842	Not-significant	0.823476	3.87985e-08	Significant
YOR078W	BUD21	Component of small ribosomal subunit (SSU) processosome	0.00424456	0.990693	Not-significant	0.823471	1.11421e-08	Significant
YPR159W	KRE6	Type II integral membrane protein	0.0471265	0.775918	Not-significant	0.823333	4.77713e-18	Significant
YPL131W	RPL5	Ribosomal 60S subunit protein L5	-0.0744418	0.799087	Not-significant	0.823254	4.36566e-14	Significant
YEL019C	MMS21	SUMO ligase and component of the SMC5-SMC6 complex	0.0920335	0.677121	Not-significant	0.823025	3.52475e-07	Significant
YLR325C	RPL38	Ribosomal 60S subunit protein L38	-0.210778	0.329521	Not-significant	0.822965	1.03208e-13	Significant
YIL052C	RPL34B	Ribosomal 60S subunit protein L34B	-0.1975	0.374035	Not-significant	0.822627	2.02345e-09	Significant
YNL023C	FAP1	Protein that binds to Fpr1p	0.237813	0.108238	Not-significant	0.821798	9.67429e-11	Significant
YLR292C	SEC72	Non-essential subunit of Sec63 complex	-0.369634	0.00709635	Significant	0.821308	1.20081e-10	Significant
YML124C	TUB3	Alpha-tubulin	-0.268131	0.124227	Not-significant	0.821217	1.59984e-13	Significant
YIL150C	MCM10	Essential chromatin-associated protein	0.066341	0.767639	Not-significant	0.819081	1.74753e-09	Significant
YIL130W	ASG1	Zinc cluster protein proposed to be a transcriptional regulator	0.202065	0.0636024	Not-significant	0.818786	3.46215e-16	Significant
YIL047C	SYG1	Plasma membrane protein of unknown function	0.155912	0.245672	Not-significant	0.818642	1.31103e-17	Significant
YLR051C	FCF2	Nucleolar protein involved in the early steps of 35S rRNA processing	0.1231	0.49221	Not-significant	0.81671	1.23947e-13	Significant
YOL093W	TRM10	tRNA methyltransferase	-0.0295704	0.911126	Not-significant	0.816593	2.27494e-08	Significant
YKL180W	RPL17A	Ribosomal 60S subunit protein L17A	-0.199511	0.413232	Not-significant	0.816472	6.94636e-12	Significant
YIL103W	DPH1	Protein required for synthesis of diphthamide	0.163315	0.360703	Not-significant	0.815452	3.64445e-11	Significant
YPL278C	YPL278C	Putative protein of unknown function	0.698676	1.66712e-07	Significant	0.815394	2.84957e-05	Significant
YER064C	YER064C	Non-essential nuclear protein	0.358896	1.05735e-05	Significant	0.814877	7.864e-06	Significant
YJL213W	YJL213W	Protein of unknown function that may interact with ribosomes	-0.158323	0.735106	Not-significant	0.814821	0.00648974	Significant
YOR243C	PUS7	Pseudouridine synthase	0.0663399	0.704426	Not-significant	0.814786	1.79306e-19	Significant
YNR039C	ZRG17	Endoplasmic reticulum zinc transporter	-0.299316	0.0572907	Not-significant	0.814073	1.27162e-12	Significant
YIL056W	VHR1	Transcriptional activator	0.515797	0.00370026	Significant	0.812157	3.6345e-10	Significant
YNL254C	RTC4	Protein of unknown function	0.274399	0.00704864	Significant	0.811738	1.38112e-14	Significant
YIR011C	STS1	Protein required for localizing proteasomes to the nucleus	0.276396	0.0123359	Significant	0.809198	7.73833e-14	Significant
YIL049W	DFG10	Probable polyprenol reductase	-0.00496394	0.99548	Not-significant	0.808796	0.00995937	Significant
YKL128C	PMU1	Putative phosphomutase	-0.501616	0.000682152	Significant	0.808691	4.89344e-11	Significant
YGR166W	TRS65	Component of transport protein particle (TRAPP) complex II	0.319272	0.093599	Not-significant	0.808532	1.60345e-06	Significant
YGR061C	ADE6	Formylglycinamidine-ribonucleotide (FGAM)-synthetase	-0.224628	0.403851	Not-significant	0.808164	1.02761e-06	Significant
YNL002C	RLP7	Nucleolar protein similar to large ribosomal subunit L7 proteins	0.0861774	0.74003	Not-significant	0.807438	2.76887e-06	Significant
YOR198C	BFR1	Component of mRNP complexes associated with polyribosomes	-0.746215	3.00782e-16	Significant	0.806794	2.54666e-17	Significant
YHR098C	SFB3	Component of the Sec23p-Sfb3p heterodimer of the COPII vesicle coat	-0.377286	0.000603266	Significant	0.806106	2.84864e-12	Significant
YNL110C	NOP15	Constituent of 66S pre-ribosomal particles	0.139936	0.554814	Not-significant	0.804161	1.82048e-09	Significant
YNR054C	ESF2	Essential nucleolar protein involved in pre-18S rRNA processing	0.139547	0.44411	Not-significant	0.80383	1.64442e-10	Significant
YOL077C	BRX1	Nucleolar protein	-0.164328	0.364589	Not-significant	0.801917	3.02719e-09	Significant
YDR519W	FPR2	Membrane-bound peptidyl-prolyl cis-trans isomerase (PPIase)	-0.883274	8.83906e-06	Significant	0.801187	6.81219e-05	Significant
YCR047C	BUD23	Methyltransferase	0.0362053	0.896417	Not-significant	0.800759	3.98996e-08	Significant
YKL033W	TTI1	Subunit of the ASTRA complex, involved in chromatin remodeling	-0.0420814	0.90721	Not-significant	0.800532	1.95048e-06	Significant
YOR208W	PTP2	Nuclear phosphotyrosine-specific phosphatase involved in osmosensing	0.143681	0.59445	Not-significant	0.799673	2.13733e-08	Significant
YDL095W	PMT1	Protein O-mannosyltransferase of the ER membrane	-0.881202	9.04402e-21	Significant	0.799519	3.47618e-16	Significant
YMR147W	YMR147W	Putative protein of unknown function	0.478875	0.0123359	Significant	0.799505	9.9819e-05	Significant
YOR301W	RAX1	Protein involved in bud site selection during bipolar budding	-0.234354	0.348853	Not-significant	0.799176	2.99018e-06	Significant
YBL008W	HIR1	Subunit of the HIR complex	-0.1377	0.414987	Not-significant	0.798381	2.15705e-11	Significant
YDR253C	MET32	Zinc-finger DNA-binding transcription factor	0.580917	0.0374733	Significant	0.796633	0.00909848	Significant
YDR361C	BCP1	Essential protein involved in nuclear export of Mss4p	-0.0404457	0.894426	Not-significant	0.79597	2.19694e-07	Significant
YML097C	VPS9	Guanine nucleotide exchange factor (GEF)	-0.162572	0.287589	Not-significant	0.795273	7.11711e-12	Significant
YOL039W	RPP2A	Ribosomal protein P2 alpha	-0.206772	0.33816	Not-significant	0.79508	5.59254e-11	Significant
YLR116W	MSL5	Component of commitment complex	0.301103	0.0405669	Significant	0.794745	4.8227e-11	Significant
YLR068W	FYV7	Essential protein required for maturation of 18S rRNA	0.102745	0.763612	Not-significant	0.793272	3.49107e-06	Significant
YBR191W	RPL21A	Ribosomal 60S subunit protein L21A	-0.264927	0.240106	Not-significant	0.792886	3.15565e-11	Significant
YGL081W	YGL081W	Putative protein of unknown function	0.492375	0.0307156	Significant	0.791757	0.00220745	Significant
YDR257C	RKM4	Ribosomal lysine methyltransferase	0.0349463	0.882148	Not-significant	0.791499	1.71132e-07	Significant
YGL256W	ADH4	Alcohol dehydrogenase isoenzyme type IV	0.0311887	0.872348	Not-significant	0.791268	8.7981e-12	Significant
YNL022C	YNL022C	rRNA m5C methyltransferase	0.0237216	0.915612	Not-significant	0.790756	2.66936e-17	Significant
YDR119W	VBA4	Protein of unknown function	-0.0543606	0.743928	Not-significant	0.790002	2.75523e-12	Significant
YML060W	OGG1	Nuclear and mitochondrial glycosylase/lyase	-0.0725774	0.729879	Not-significant	0.788903	3.20075e-11	Significant
YGL162W	SUT1	Transcription factor of the Zn(II)2Cys6 family	0.189981	0.492883	Not-significant	0.788253	3.0529e-05	Significant
YCR063W	BUD31	Component of the SF3b subcomplex of the U2 snRNP	0.198227	0.431213	Not-significant	0.78753	0.000396149	Significant
YPR186C	PZF1	Transcription factor IIIA (TFIIIA)	0.232147	0.152451	Not-significant	0.787296	1.25309e-08	Significant
YHR144C	DCD1	Deoxycytidine monophosphate (dCMP) deaminase	-0.111566	0.59445	Not-significant	0.78699	2.8528e-07	Significant
YNL111C	CYB5	Cytochrome b5	-0.266317	0.215775	Not-significant	0.786824	8.13065e-08	Significant
YEL048C	TCA17	Component of transport protein particle (TRAPP) complex II	0.234436	0.462654	Not-significant	0.786214	0.00417732	Significant
YHR049W	FSH1	Putative serine hydrolase	0.390188	0.0230464	Significant	0.784054	6.03818e-08	Significant
YOR334W	MRS2	Mitochondrial inner membrane Mg(2+) channel	0.265387	0.0326639	Significant	0.782925	1.34057e-05	Significant
YER102W	RPS8B	Protein component of the small (40S) ribosomal subunit	-0.201794	0.407396	Not-significant	0.782833	3.52328e-09	Significant
YPL239W	YAR1	Ankyrin-repeat containing, nucleocytoplasmic shuttling chaperone	-0.0520464	0.844908	Not-significant	0.78279	1.26637e-08	Significant
YHR084W	STE12	Transcription factor that is activated by a MAPK signaling cascade	-0.103036	0.686776	Not-significant	0.782687	2.16742e-09	Significant
YCL041C	YCL041C	Dubious open reading frame	-0.507413	0.087102	Not-significant	0.782524	0.00529992	Significant
YOL125W	TRM13	2'-O-methyltransferase	0.180077	0.463957	Not-significant	0.78161	1.70356e-09	Significant
YJL071W	ARG2	Acetylglutamate synthase (glutamate N-acetyltransferase)	-0.126186	0.473551	Not-significant	0.779895	1.49988e-10	Significant
YHR064C	SSZ1	Hsp70 protein that interacts with Zuo1p (a DnaJ homolog)	-0.0444742	0.854602	Not-significant	0.77968	4.80629e-13	Significant
YKL068W	NUP100	FG-nucleoporin component of central core of the nuclear pore complex	0.0411167	0.801913	Not-significant	0.778942	5.79923e-15	Significant
YPL103C	FMP30	Protein with a role in maintaining mitochondrial morphology	0.0436609	0.871456	Not-significant	0.778477	1.97009e-07	Significant
YDR310C	SUM1	Transcriptional repressor that regulates middle-sporulation genes	-0.152602	0.145738	Not-significant	0.777565	2.44731e-21	Significant
YNL061W	NOP2	rRNA m5C methyltransferase	0.0807123	0.711322	Not-significant	0.777553	5.46928e-16	Significant
YML045W	YML045W	Retrotransposon TYA Gag and TYB Pol genes	-0.55166	0.440087	Not-significant	0.776804	0.00172303	Significant
YBR031W	RPL4A	Ribosomal 60S subunit protein L4A	0.0175232	0.96465	Not-significant	0.775832	2.80753e-08	Significant
YGL236C	MTO1	Mitochondrial protein	-0.167245	0.465666	Not-significant	0.775823	2.9248e-09	Significant
YOR297C	TIM18	Component of the mitochondrial TIM22 complex	-0.118889	0.633172	Not-significant	0.774066	3.36991e-05	Significant
YDR364C	CDC40	Pre-mRNA splicing factor	0.0908949	0.539589	Not-significant	0.773537	5.44291e-12	Significant
YHL015W	RPS20	Protein component of the small (40S) ribosomal subunit	-0.249547	0.192883	Not-significant	0.772537	1.42164e-12	Significant
YKL056C	TMA19	Protein that associates with ribosomes	-0.0717267	0.794301	Not-significant	0.772385	3.61895e-12	Significant
YGL099W	LSG1	Putative GTPase involved in 60S ribosomal subunit biogenesis	0.0373635	0.864678	Not-significant	0.771007	2.48126e-16	Significant
YLR216C	CPR6	Peptidyl-prolyl cis-trans isomerase (cyclophilin)	0.673362	4.548e-05	Significant	0.770085	8.68159e-20	Significant
YFR009W-A	YFR009W-A	Dubious open reading frame	0.107878	0.652197	Not-significant	0.769419	6.26315e-06	Significant
YDR523C	SPS1	Putative protein serine/threonine kinase	-0.328459	0.355188	Not-significant	0.769318	0.00318108	Significant
YOR205C	GEP3	Protein required for mitochondrial ribosome small subunit biogenesis	0.0190759	0.911126	Not-significant	0.76863	1.06143e-13	Significant
YNR065C	YNR065C	Protein of unknown function	0.402474	0.0275584	Significant	0.768358	9.06802e-07	Significant
YFR036W	CDC26	Subunit of the Anaphase-Promoting Complex/Cyclosome (APC/C)	0.304593	0.150233	Not-significant	0.767762	0.000108829	Significant
YCL059C	KRR1	Nucleolar protein required for rRNA synthesis and ribosomal assembly	0.099005	0.713923	Not-significant	0.767373	2.82138e-08	Significant
YIL145C	PAN6	Pantothenate synthase	0.0672585	0.809217	Not-significant	0.766331	3.80374e-09	Significant
YNL282W	POP3	Subunit of both RNase MRP and nuclear RNase P	0.247124	0.300759	Not-significant	0.76589	2.08137e-05	Significant
YML026C	RPS18B	Protein component of the small (40S) ribosomal subunit	-0.237033	0.22023	Not-significant	0.765232	1.72923e-13	Significant
YOL130W	ALR1	Plasma membrane Mg(2+) transporter	-0.243465	0.160174	Not-significant	0.764946	5.21225e-14	Significant
YCL048W	SPS22	Protein of unknown function	0.50456	0.0560366	Not-significant	0.764861	0.0108485	Significant
YFL001W	DEG1	tRNA:pseudouridine synthase	0.276296	0.0792343	Not-significant	0.764341	2.64779e-11	Significant
YOR250C	CLP1	Component of the cleavage and polyadenylation factor I (CF I)	-0.304151	0.0283051	Significant	0.762605	6.15144e-09	Significant
YGR014W	MSB2	Mucin family member involved in various signaling pathways	-0.233712	0.103657	Not-significant	0.761975	2.80045e-11	Significant
YDR110W	FOB1	Nucleolar protein that binds the rDNA replication fork barrier site	0.0406229	0.886034	Not-significant	0.761746	3.83348e-09	Significant
YNL299W	TRF5	Non-canonical poly(A) polymerase	0.131593	0.407274	Not-significant	0.761575	1.55656e-12	Significant
YKL006W	RPL14A	Ribosomal 60S subunit protein L14A	-0.169793	0.55049	Not-significant	0.761364	2.68136e-10	Significant
YDR217C	RAD9	DNA damage-dependent checkpoint protein	-0.0270635	0.910144	Not-significant	0.761256	1.26201e-09	Significant
YKR072C	SIS2	Negative regulatory subunit of protein phosphatase 1 (Ppz1p)	0.0403283	0.843736	Not-significant	0.760997	1.67723e-11	Significant
YKL018W	SWD2	Subunit of the COMPASS (Set1C) histone H3K4 methyltransferase complex	0.0193784	0.944455	Not-significant	0.759733	1.79603e-08	Significant
YOL121C	RPS19A	Protein component of the small (40S) ribosomal subunit	-0.224777	0.282974	Not-significant	0.758778	2.73528e-09	Significant
YLR431C	ATG23	Peripheral membrane protein required for autophagy and CVT	0.260376	0.0824787	Not-significant	0.757836	4.00938e-09	Significant
YKL055C	OAR1	Mitochondrial 3-oxoacyl-[acyl-carrier-protein] reductase	-0.23824	0.624091	Not-significant	0.756757	0.0193466	Significant
YBR125C	PTC4	Cytoplasmic type 2C protein phosphatase (PP2C)	0.0816655	0.704254	Not-significant	0.756401	7.72484e-11	Significant
YMR216C	SKY1	SR protein kinase (SRPK)	-0.026819	0.889733	Not-significant	0.755319	1.07749e-14	Significant
YIL018W	RPL2B	Ribosomal 60S subunit protein L2B	-0.255662	0.210707	Not-significant	0.754687	4.0391e-11	Significant
YOR060C	SLD7	Protein with a role in chromosomal DNA replication	0.204758	0.50159	Not-significant	0.754531	0.000238898	Significant
YBR257W	POP4	Subunit of both RNase MRP and nuclear RNase P	0.256517	0.1261	Not-significant	0.753705	2.00208e-08	Significant
YOR308C	SNU66	Component of the U4/U6.U5 snRNP complex	0.166622	0.303289	Not-significant	0.752196	2.82648e-08	Significant
YGR271C-A	EFG1	Essential protein required for maturation of 18S rRNA	0.135144	0.59509	Not-significant	0.752137	0.000119199	Significant
YCL055W	KAR4	Transcription factor required for response to pheromones	-0.374089	0.0392156	Significant	0.751901	6.09609e-09	Significant
YBL087C	RPL23A	Ribosomal 60S subunit protein L23A	-0.174605	0.443006	Not-significant	0.751585	4.27319e-10	Significant
YER055C	HIS1	ATP phosphoribosyltransferase	-0.130258	0.608014	Not-significant	0.750959	2.67701e-12	Significant
YKL185W	ASH1	Component of the Rpd3L histone deacetylase complex	0.17237	0.215208	Not-significant	0.75045	2.14458e-12	Significant
YAL023C	PMT2	Protein O-mannosyltransferase of the ER membrane	-0.75943	6.77609e-16	Significant	0.750344	6.20644e-17	Significant
YBR082C	UBC4	Ubiquitin-conjugating enzyme (E2)	0.130187	0.574221	Not-significant	0.748489	2.00741e-07	Significant
YBR143C	SUP45	Polypeptide release factor (eRF1) in translation termination	-0.176031	0.354669	Not-significant	0.745986	8.80038e-07	Significant
YDR420W	HKR1	Mucin family member that functions as an osmosensor in the HOG pathway	0.0469441	0.875104	Not-significant	0.745934	1.70855e-08	Significant
YDL042C	SIR2	Conserved NAD+ dependent histone deacetylase of the Sirtuin family	-0.103632	0.554218	Not-significant	0.745404	5.85748e-14	Significant
YBR201W	DER1	ER membrane protein that promotes export of misfolded polypeptides	-0.725768	0.00016588	Significant	0.744709	9.34782e-05	Significant
YGR095C	RRP46	Exosome non-catalytic core component	0.346375	0.0479516	Significant	0.744168	2.7833e-08	Significant
YDR482C	CWC21	Protein involved in RNA splicing by the spliceosome	-0.045266	0.891062	Not-significant	0.743657	5.74981e-06	Significant
YER003C	PMI40	Mannose-6-phosphate isomerase	-0.624704	1.65586e-05	Significant	0.743099	8.46129e-09	Significant
YJL091C	GWT1	Protein involved in the inositol acylation of GlcN-PI	-0.925724	0.000181985	Significant	0.742923	0.00442493	Significant
YAR042W	SWH1	Protein similar to mammalian oxysterol-binding protein	0.29631	0.0974575	Not-significant	0.740727	5.22561e-08	Significant
YHR089C	GAR1	Protein component of the H/ACA snoRNP pseudouridylase complex	-0.0726208	0.811834	Not-significant	0.740523	2.35274e-09	Significant
YER062C	HOR2	DL-glycerol-3-phosphate phosphatase involved in glycerol biosynthesis	1.1395	1.41416e-08	Up-regulated	0.740252	3.82992e-07	Significant
YNL251C	NRD1	RNA-binding subunit of Nrd1 complex	-0.200892	0.400628	Not-significant	0.74023	3.20241e-06	Significant
YJL177W	RPL17B	Ribosomal 60S subunit protein L17B	-0.269788	0.188701	Not-significant	0.735669	1.68987e-09	Significant
YDL219W	DTD1	D-Tyr-tRNA(Tyr) deacylase	-0.330423	0.168751	Not-significant	0.735262	0.00309204	Significant
YER144C	UBP5	Putative ubiquitin-specific protease	0.174094	0.146517	Not-significant	0.734654	2.72651e-11	Significant
YMR079W	SEC14	Phosphatidylinositol/phosphatidylcholine transfer protein	-0.0543677	0.723492	Not-significant	0.734612	2.2197e-16	Significant
YDR524C	AGE1	ADP-ribosylation factor (ARF) GTPase activating protein (GAP) effector	-0.167152	0.269937	Not-significant	0.73402	2.85119e-08	Significant
YFR032C-A	RPL29	Ribosomal 60S subunit protein L29	-0.151843	0.543411	Not-significant	0.73335	2.64402e-08	Significant
YDR198C	RKM2	Ribosomal protein lysine methyltransferase	0.0422852	0.8391	Not-significant	0.733209	2.19378e-07	Significant
YNL227C	JJJ1	Co-chaperone that stimulates the ATPase activity of Ssa1p	0.22601	0.244936	Not-significant	0.732717	4.16393e-06	Significant
YKL054C	DEF1	RNAPII degradation factor	0.0461418	0.774195	Not-significant	0.732439	5.36754e-14	Significant
YML023C	NSE5	Component of the SMC5-SMC6 complex	0.0359245	0.868817	Not-significant	0.730672	8.59452e-07	Significant
YKL001C	MET14	Adenylylsulfate kinase	-0.256256	0.323906	Not-significant	0.730085	0.000256023	Significant
YPR069C	SPE3	Spermidine synthase	-0.233277	0.158995	Not-significant	0.72952	1.98858e-08	Significant
YLR143W	YLR143W	Diphthamide synthetase	0.069795	0.73493	Not-significant	0.729061	6.64333e-09	Significant
YOR260W	GCD1	Gamma subunit of the translation initiation factor eIF2B	-0.112762	0.345337	Not-significant	0.728278	5.79985e-15	Significant
YOL154W	ZPS1	Putative GPI-anchored protein	-0.0584584	0.899716	Not-significant	0.728173	0.00751638	Significant
YPL277C	YPL277C	Putative protein of unknown function	0.409524	0.0457331	Significant	0.727473	0.000982443	Significant
YML073C	RPL6A	Ribosomal 60S subunit protein L6A	-0.231547	0.145136	Not-significant	0.727448	4.06725e-14	Significant
YBR136W	MEC1	Genome integrity checkpoint protein and PI kinase superfamily member	-0.103088	0.701811	Not-significant	0.726565	7.52996e-08	Significant
YGR083C	GCD2	Delta subunit of the translation initiation factor eIF2B	0.0520436	0.725355	Not-significant	0.726244	1.3122e-15	Significant
YGR093W	YGR093W	Splicing factor that modulates turnover of branched RNAs by Dbr1p	0.0832822	0.703123	Not-significant	0.726221	1.48703e-09	Significant
YDR471W	RPL27B	Ribosomal 60S subunit protein L27B	-0.163432	0.452124	Not-significant	0.72608	1.02999e-09	Significant
YPL082C	MOT1	Essential protein involved in regulation of transcription	-0.103726	0.531715	Not-significant	0.725456	3.78815e-09	Significant
YMR187C	YMR187C	Putative protein of unknown function	-0.315392	0.247916	Not-significant	0.721541	0.00100176	Significant
YBR249C	ARO4	3-deoxy-D-arabino-heptulosonate-7-phosphate (DAHP) synthase	-0.279209	0.171812	Not-significant	0.721424	3.02997e-10	Significant
YEL046C	GLY1	Threonine aldolase	0.413022	0.0107876	Significant	0.720985	9.76568e-10	Significant
YML016C	PPZ1	Serine/threonine protein phosphatase Z, isoform of Ppz2p	0.0928825	0.532364	Not-significant	0.720445	2.62327e-18	Significant
YPL273W	SAM4	S-adenosylmethionine-homocysteine methyltransferase	-0.617055	2.5428e-06	Significant	0.720326	1.60831e-08	Significant
YPL211W	NIP7	Nucleolar protein required for 60S ribosome subunit biogenesis	0.119184	0.680572	Not-significant	0.719735	8.08299e-07	Significant
YBL014C	RRN6	Component of the core factor (CF) rDNA transcription factor complex	-0.116598	0.565623	Not-significant	0.719545	7.65478e-09	Significant
YDL208W	NHP2	Protein related to mammalian high mobility group (HMG) proteins	-0.0472363	0.895459	Not-significant	0.719322	2.52879e-08	Significant
YDR211W	GCD6	Catalytic epsilon subunit of the translation initiation factor eIF2B	0.141113	0.325066	Not-significant	0.719096	2.27804e-08	Significant
YOL120C	RPL18A	Ribosomal 60S subunit protein L18A	-0.164252	0.471098	Not-significant	0.717439	2.82022e-09	Significant
YBR066C	NRG2	Transcriptional repressor	-0.487704	0.0974575	Not-significant	0.716985	0.00293846	Significant
YML029W	USA1	Scaffold subunit of the Hrd1p ubiquitin ligase	-0.363695	0.00539106	Significant	0.71675	1.69495e-09	Significant
YBL060W	YEL1	Guanine nucleotide exchange factor specific for Arf3p	0.013815	0.956583	Not-significant	0.716593	1.95751e-08	Significant
YHR102W	KIC1	Protein kinase of the PAK/Ste20 family, required for cell integrity	-0.0804824	0.733945	Not-significant	0.714633	4.44571e-06	Significant
YFR031C-A	RPL2A	Ribosomal 60S subunit protein L2A	-0.230996	0.304972	Not-significant	0.714579	1.53231e-06	Significant
YDR156W	RPA14	RNA polymerase I subunit A14	0.0675576	0.834631	Not-significant	0.71383	0.000109317	Significant
YDR514C	YDR514C	Protein of unknown function that localizes to mitochondria	-0.0112496	0.963531	Not-significant	0.71368	1.15678e-08	Significant
YCR089W	FIG2	Cell wall adhesin, expressed specifically during mating	-0.0314668	0.886718	Not-significant	0.713601	2.23644e-09	Significant
YLL028W	TPO1	Polyamine transporter of the major facilitator superfamily	0.744012	3.64046e-05	Significant	0.71336	1.45783e-05	Significant
YOL011W	PLB3	Phospholipase B (lysophospholipase) involved in lipid metabolism	0.156078	0.340974	Not-significant	0.712626	7.43247e-12	Significant
YGL246C	RAI1	Nuclear protein with decapping endonuclease activity	0.0464347	0.859509	Not-significant	0.712429	2.26262e-07	Significant
YFR009W	GCN20	Positive regulator of the Gcn2p kinase activity	0.0288372	0.899716	Not-significant	0.712214	7.86377e-17	Significant
YKR041W	YKR041W	Protein of unknown function	0.415728	0.135618	Not-significant	0.712022	0.00157561	Significant
YOL127W	RPL25	Ribosomal 60S subunit protein L25	-0.204597	0.360912	Not-significant	0.711989	5.58241e-09	Significant
YGR173W	RBG2	Protein with a role in translation	0.123806	0.39377	Not-significant	0.711936	1.48102e-07	Significant
YKL144C	RPC25	RNA polymerase III subunit C25	-0.101623	0.644824	Not-significant	0.711414	9.07459e-08	Significant
YHR134W	WSS1	Metalloprotease involved in DNA repair, removes DNA-protein crosslink	0.233036	0.358067	Not-significant	0.710225	1.53182e-05	Significant
YJR002W	MPP10	Component of the SSU processome and 90S preribosome	0.112213	0.562433	Not-significant	0.709139	1.1641e-09	Significant
YOR063W	RPL3	Ribosomal 60S subunit protein L3	-0.0150533	0.962337	Not-significant	0.709002	1.92633e-08	Significant
YOR128C	ADE2	Phosphoribosylaminoimidazole carboxylase	-0.40447	0.489542	Not-significant	0.708989	0.00792261	Significant
YBR092C	PHO3	Constitutively expressed acid phosphatase similar to Pho5p	1.03468	1.99588e-14	Up-regulated	0.708917	1.09577e-06	Significant
YJR132W	NMD5	Karyopherin	-0.0155177	0.956583	Not-significant	0.70831	1.514e-06	Significant
YLR224W	YLR224W	F-box protein and component of SCF ubiquitin ligase complexes	0.0548018	0.77635	Not-significant	0.707616	7.76301e-11	Significant
YOR210W	RPB10	RNA polymerase subunit ABC10-beta	0.182509	0.292905	Not-significant	0.705729	6.79468e-09	Significant
YNL042W	BOP3	Protein of unknown function	-0.0775664	0.762546	Not-significant	0.704865	0.000156891	Significant
YKR060W	UTP30	Putative subunit of U3-containing 90S preribosome complex	0.152352	0.423922	Not-significant	0.703743	7.80306e-05	Significant
YIL148W	RPL40A	Ubiquitin-ribosomal 60S subunit protein L40A fusion protein	-0.173668	0.458837	Not-significant	0.70202	5.52769e-11	Significant
YGL103W	RPL28	Ribosomal 60S subunit protein L28	-0.0155076	0.964097	Not-significant	0.701701	1.69821e-09	Significant
YNL308C	KRI1	Essential nucleolar protein required for 40S ribosome biogenesis	0.148203	0.489373	Not-significant	0.701295	3.31497e-07	Significant
YOR305W	RRG7	Protein of unknown function	-0.0799521	0.747281	Not-significant	0.701181	8.92677e-07	Significant
YCR031C	RPS14A	Protein component of the small (40S) ribosomal subunit	-0.250547	0.217021	Not-significant	0.700544	6.23269e-10	Significant
YLR384C	IKI3	Subunit of Elongator complex	-0.0209794	0.939254	Not-significant	0.700139	7.71887e-10	Significant
YMR127C	SAS2	Histone acetyltransferase (HAT) catalytic subunit of the SAS complex	0.0128373	0.962461	Not-significant	0.699229	4.65738e-07	Significant
YOR107W	RGS2	Negative regulator of glucose-induced cAMP signaling	1.07471	4.38988e-08	Up-regulated	0.699198	0.00012035	Significant
YNL249C	MPA43	Putative protein of unknown function	-0.175672	0.600205	Not-significant	0.698511	0.000992023	Significant
YER074W	RPS24A	Protein component of the small (40S) ribosomal subunit	-0.250388	0.249662	Not-significant	0.698506	4.83259e-08	Significant
YBR291C	CTP1	Mitochondrial inner membrane citrate transporter	0.0889074	0.891764	Not-significant	0.697332	0.0383026	Significant
YDR320C	SWA2	Auxilin-like protein involved in vesicular transport	-0.439348	0.000998441	Significant	0.696757	1.2423e-09	Significant
YPL086C	ELP3	Subunit of Elongator complex	0.153184	0.238537	Not-significant	0.696201	1.49721e-12	Significant
YHR021C	RPS27B	Protein component of the small (40S) ribosomal subunit	-0.154123	0.496224	Not-significant	0.695866	1.35856e-10	Significant
YGR198W	YPP1	Cargo-transport protein involved in endocytosis	0.105029	0.655568	Not-significant	0.695472	1.43927e-06	Significant
YER007W	PAC2	Microtubule effector required for tubulin heterodimer formation	-0.0756485	0.860454	Not-significant	0.69527	0.000951382	Significant
YNL301C	RPL18B	Ribosomal 60S subunit protein L18B	0.140395	0.361641	Not-significant	0.694192	2.47899e-06	Significant
YHL026C	YHL026C	Putative protein of unknown function	0.351923	0.00241792	Significant	0.693529	2.99037e-08	Significant
YHR019C	DED81	Cytosolic asparaginyl-tRNA synthetase	-0.166164	0.340258	Not-significant	0.693346	1.19939e-09	Significant
YOR098C	NUP1	FG-nucleoporin component of central core of the nuclear pore complex	-0.0780101	0.641985	Not-significant	0.693229	3.29895e-14	Significant
YLR010C	TEN1	Protein that regulates telomeric length	0.5535	0.00158549	Significant	0.693103	0.0029852	Significant
YOR222W	ODC2	Mitochondrial inner membrane transporter	-0.399824	0.0223785	Significant	0.692239	1.03145e-05	Significant
snR44	snR44	H/ACA box small nucleolar RNA (snoRNA)	-0.067562	0.874806	Not-significant	0.692115	0.0141779	Significant
YGR094W	VAS1	Mitochondrial and cytoplasmic valyl-tRNA synthetase	-0.204822	0.0931105	Not-significant	0.691151	3.91392e-17	Significant
YER131W	RPS26B	Protein component of the small (40S) ribosomal subunit	-0.244639	0.316336	Not-significant	0.690758	6.16051e-10	Significant
YOR299W	BUD7	Member of the ChAPs family (Chs5p-Arf1p-binding proteins)	-0.12544	0.408903	Not-significant	0.690155	4.27657e-09	Significant
YMR265C	YMR265C	Putative protein of unknown function	0.736838	2.5536e-05	Significant	0.690017	0.000102683	Significant
YLR042C	YLR042C	Cell wall protein of unknown function	-0.404702	0.249567	Not-significant	0.689572	0.037249	Significant
YPL092W	SSU1	Plasma membrane sulfite pump involved in sulfite metabolism	-0.415786	0.0102372	Significant	0.689383	5.36948e-05	Significant
YHR065C	RRP3	Protein involved in rRNA processing	0.0729013	0.687821	Not-significant	0.689381	3.48363e-11	Significant
YPL201C	YIG1	Protein that interacts with glycerol 3-phosphatase	-1.41956	1.84494e-22	Down-regulated	0.68914	1.17359e-06	Significant
YLR424W	SPP382	Essential protein that forms a dimer with Ntr2p	-0.465538	0.0327939	Significant	0.68579	0.000154005	Significant
YMR112C	MED11	Subunit of the RNA polymerase II mediator complex	-0.463647	0.0519841	Not-significant	0.685739	0.000627077	Significant
YER077C	YER077C	Protein that associates with mitochondrial ribosome	0.120451	0.621352	Not-significant	0.68326	5.59935e-06	Significant
YGR208W	SER2	Phosphoserine phosphatase of the phosphoglycerate pathway	-0.01562	0.968282	Not-significant	0.682486	1.67444e-05	Significant
YPL125W	KAP120	Karyopherin responsible for the nuclear import of Rpf1p	-0.121524	0.72454	Not-significant	0.682149	0.000639873	Significant
YPR041W	TIF5	Translation initiation factor eIF5	0.0668612	0.76178	Not-significant	0.68093	3.66598e-13	Significant
YBL028C	YBL028C	Protein of unknown function that may interact with ribosomes	0.070807	0.810492	Not-significant	0.679596	1.64605e-05	Significant
YDL075W	RPL31A	Ribosomal 60S subunit protein L31A	-0.235363	0.27803	Not-significant	0.679308	1.58954e-08	Significant
YGL123W	RPS2	Protein component of the small (40S) subunit	-0.211028	0.358067	Not-significant	0.67894	3.86864e-10	Significant
YJL087C	TRL1	tRNA ligase	-0.0927667	0.668914	Not-significant	0.678779	4.7726e-08	Significant
YLR022C	SDO1	Guanine nucleotide exchange factor (GEF) for Ria1p	0.142832	0.551031	Not-significant	0.678173	1.67234e-08	Significant
YHR207C	SET5	Methyltransferase involved in methylation of histone H4 Lys5, -8, -12	0.296123	0.019887	Significant	0.677996	2.61111e-08	Significant
YPL252C	YAH1	Ferredoxin of the mitochondrial matrix	-0.124215	0.58447	Not-significant	0.677781	3.78657e-08	Significant
YLL010C	PSR1	Plasma membrane associated protein phosphatase	0.358988	0.0050779	Significant	0.67715	5.0261e-11	Significant
YMR238W	DFG5	Putative mannosidase	0.285754	0.034312	Significant	0.676941	9.34119e-09	Significant
YHR143W-A	RPC10	RNA polymerase subunit ABC10-alpha, found in RNA pol I, II, and III	0.088925	0.721258	Not-significant	0.676659	2.582e-07	Significant
YEL058W	PCM1	Essential N-acetylglucosamine-phosphate mutase	-0.305157	0.0053538	Significant	0.675946	1.79898e-11	Significant
YDL033C	SLM3	tRNA-specific 2-thiouridylase	0.182104	0.55423	Not-significant	0.675235	0.00411363	Significant
YPR074C	TKL1	Transketolase	-0.134066	0.403851	Not-significant	0.673583	1.95751e-08	Significant
YHR062C	RPP1	Subunit of both RNase MRP and nuclear RNase P	0.0605577	0.822675	Not-significant	0.67333	3.86202e-06	Significant
YHL029C	OCA5	Cytoplasmic protein required for replication of Brome mosaic virus	0.132036	0.299587	Not-significant	0.673007	2.7346e-13	Significant
YOL022C	TSR4	Cytoplasmic protein required for correct processing of 20S pre-rRNA	0.0448773	0.840944	Not-significant	0.672823	2.90447e-07	Significant
YIL051C	MMF1	Mitochondrial protein required for transamination of isoleucine	0.0113856	0.959502	Not-significant	0.671184	3.81772e-14	Significant
YER002W	NOP16	Constituent of 66S pre-ribosomal particles	0.345816	0.0117818	Significant	0.670707	4.46516e-07	Significant
YJR010W	MET3	ATP sulfurylase	-0.611487	0.00784581	Significant	0.669856	0.00124386	Significant
YPL204W	HRR25	Protein kinase	0.170755	0.150672	Not-significant	0.668831	5.98696e-16	Significant
YKL198C	PTK1	Putative serine/threonine protein kinase	0.19444	0.350371	Not-significant	0.66808	1.3104e-05	Significant
YOR293W	RPS10A	Protein component of the small (40S) ribosomal subunit	-0.2841	0.163142	Not-significant	0.667891	1.54825e-15	Significant
YNL232W	CSL4	Exosome non-catalytic core component	0.182398	0.39279	Not-significant	0.66778	2.23559e-05	Significant
YHR112C	YHR112C	Protein of unknown function	0.0937012	0.687883	Not-significant	0.667369	7.69826e-07	Significant
YLR004C	THI73	Putative plasma membrane permease	-0.0906292	0.756377	Not-significant	0.667094	0.000286146	Significant
YLR029C	RPL15A	Ribosomal 60S subunit protein L15A	-0.0919483	0.767394	Not-significant	0.66639	2.99924e-06	Significant
YGR175C	ERG1	Squalene epoxidase	0.434415	0.0048146	Significant	0.665875	2.30141e-07	Significant
YJR111C	YJR111C	Putative protein of unknown function	0.166522	0.340974	Not-significant	0.664562	7.61582e-07	Significant
YOR369C	RPS12	Protein component of the small (40S) ribosomal subunit	-0.243352	0.206602	Not-significant	0.662966	5.60879e-09	Significant
YNL218W	MGS1	Protein with DNA-dependent ATPase and ssDNA annealing activities	-0.321369	0.00362101	Significant	0.662933	7.72788e-08	Significant
YML082W	YML082W	Putative protein predicted to have carbon-sulfur lyase activity	0.217344	0.111452	Not-significant	0.661761	3.13313e-09	Significant
YDR385W	EFT2	Elongation factor 2 (EF-2), also encoded by EFT1	-0.0299326	0.912189	Not-significant	0.659958	6.29989e-10	Significant
YLR363W-A	YLR363W-A	Protein of unknown function	-0.00325214	0.995466	Not-significant	0.658813	5.59284e-05	Significant
YDR312W	SSF2	Protein required for ribosomal large subunit maturation	0.163117	0.318492	Not-significant	0.657704	8.79172e-06	Significant
YML099C	ARG81	Zinc finger transcription factor involved in arginine-responsive genes	0.0242271	0.922009	Not-significant	0.657701	5.48265e-07	Significant
snR33	snR33	H/ACA box small nucleolar RNA (snoRNA)	-0.137745	0.668262	Not-significant	0.656107	0.00443476	Significant
YIL110W	HPM1	AdoMet-dependent methyltransferase	0.108017	0.593509	Not-significant	0.655211	1.1726e-09	Significant
YGR057C	LST7	Protein possibly involved in a post-Golgi secretory pathway	0.228102	0.332469	Not-significant	0.65489	0.00537397	Significant
YJL209W	CBP1	Mitochondrial protein, regulator of COB mRNA stability and translation	0.269561	0.05426	Not-significant	0.654275	3.3885e-08	Significant
YJR003C	YJR003C	Protein that associates with mitochondrial ribosome	-0.230797	0.429933	Not-significant	0.653166	0.00794857	Significant
YLR199C	PBA1	Protein involved in 20S proteasome assembly	-0.112494	0.56288	Not-significant	0.653162	8.11031e-06	Significant
YDL117W	CYK3	SH3-domain protein located in the bud neck and cytokinetic actin ring	0.0444081	0.864507	Not-significant	0.652371	2.8566e-09	Significant
YLR056W	ERG3	C-5 sterol desaturase	0.41695	0.00553392	Significant	0.652008	5.56789e-05	Significant
YGR217W	CCH1	Voltage-gated high-affinity calcium channel	-0.231688	0.210804	Not-significant	0.651999	1.16144e-06	Significant
YOR233W	KIN4	Serine/threonine protein kinase	0.00333894	0.987499	Not-significant	0.651759	2.02345e-09	Significant
YOR115C	TRS33	Core component of transport protein particle (TRAPP) complexes I-III	-0.214175	0.285058	Not-significant	0.650711	0.000232506	Significant
YKL071W	YKL071W	Putative protein of unknown function	0.764855	0.000919456	Significant	0.650679	0.00253281	Significant
YDR418W	RPL12B	Ribosomal 60S subunit protein L12B	-0.18476	0.393636	Not-significant	0.650475	3.19744e-08	Significant
YLR390W-A	CCW14	Covalently linked cell wall glycoprotein	0.333762	0.0438492	Significant	0.649934	2.74488e-06	Significant
YER049W	TPA1	Fe(II)/2-oxoglutarate-dependent dioxygenase family member	-0.00317534	0.987499	Not-significant	0.649805	5.96178e-11	Significant
YOR188W	MSB1	Protein of unknown function	-0.265553	0.0194565	Significant	0.649719	2.34774e-08	Significant
YDR382W	RPP2B	Ribosomal protein P2 beta	-0.163548	0.481433	Not-significant	0.649539	1.27312e-07	Significant
YIL133C	RPL16A	Ribosomal 60S subunit protein L16A	-0.174542	0.305142	Not-significant	0.649515	9.15395e-10	Significant
YMR143W	RPS16A	Protein component of the small (40S) ribosomal subunit	-0.231201	0.210388	Not-significant	0.649295	3.81434e-08	Significant
YDR453C	TSA2	Stress inducible cytoplasmic thioredoxin peroxidase	0.362807	0.108278	Not-significant	0.649222	0.0011674	Significant
YPL090C	RPS6A	Protein component of the small (40S) ribosomal subunit	-0.271265	0.151849	Not-significant	0.647594	3.06448e-08	Significant
YJL149W	DAS1	Putative SCF ubiquitin ligase F-box protein	0.230998	0.43288	Not-significant	0.647207	0.000491923	Significant
YGR028W	MSP1	Highly-conserved N-terminally anchored AAA-ATPase	-0.459818	0.00375985	Significant	0.647033	4.02944e-05	Significant
YDL083C	RPS16B	Protein component of the small (40S) ribosomal subunit	-0.165124	0.53264	Not-significant	0.645734	1.31693e-07	Significant
YML024W	RPS17A	Ribosomal protein 51 (rp51) of the small (40s) subunit	-0.322545	0.0691624	Not-significant	0.645655	3.43291e-09	Significant
YOR108W	LEU9	Alpha-isopropylmalate synthase II (2-isopropylmalate synthase)	-0.207182	0.086131	Not-significant	0.644849	7.93848e-08	Significant
YMR241W	YHM2	Citrate and oxoglutarate carrier protein	-1.29682	1.43308e-43	Down-regulated	0.644403	1.84573e-10	Significant
YDR065W	RRG1	Protein of unknown function	0.0779896	0.788744	Not-significant	0.644137	0.000854854	Significant
YLR075W	RPL10	Ribosomal 60S subunit protein L10	0.0254141	0.944303	Not-significant	0.644004	1.27177e-06	Significant
YDL130W	RPP1B	Ribosomal protein P1 beta	-0.238195	0.173859	Not-significant	0.643869	2.38761e-07	Significant
YKL082C	RRP14	Essential protein, constituent of 66S pre-ribosomal particles	0.236165	0.104855	Not-significant	0.643779	9.12401e-08	Significant
YIL076W	SEC28	Epsilon-COP subunit of the coatomer	-0.198392	0.133592	Not-significant	0.64346	1.05868e-09	Significant
YEL031W	SPF1	P-type ATPase, ion transporter of the ER membrane	-0.745139	8.40797e-16	Significant	0.642689	9.11344e-11	Significant
YGL189C	RPS26A	Protein component of the small (40S) ribosomal subunit	-0.169375	0.465172	Not-significant	0.64267	2.86918e-08	Significant
YOR096W	RPS7A	Protein component of the small (40S) ribosomal subunit	-0.236717	0.244214	Not-significant	0.641641	5.13944e-09	Significant
YDR006C	SOK1	Protein of unknown function	0.0928179	0.646055	Not-significant	0.641147	5.71103e-09	Significant
YPL032C	SVL3	Protein of unknown function	-0.184317	0.211331	Not-significant	0.640702	1.49055e-09	Significant
YFL055W	AGP3	Low-affinity amino acid permease	0.126517	0.52203	Not-significant	0.640275	0.000196421	Significant
YGR185C	TYS1	Cytoplasmic tyrosyl-tRNA synthetase	-0.344274	0.00884483	Significant	0.640221	2.83481e-13	Significant
YBR091C	TIM12	Essential protein of the inner mitochondrial membrane	-0.333586	0.148425	Not-significant	0.640023	0.00112841	Significant
YHR047C	AAP1	Arginine/alanine amino peptidase	-0.263435	0.0545082	Not-significant	0.639575	1.51269e-09	Significant
YLR016C	PML1	Subunit of the RES complex	0.406596	0.0640332	Not-significant	0.638631	0.000326008	Significant
YIL047C-A	YIL047C-A	Dubious open reading frame	0.111727	0.723348	Not-significant	0.637717	0.00277946	Significant
YPL095C	EEB1	Acyl-coenzymeA:ethanol O-acyltransferase	-0.965129	1.34797e-09	Significant	0.637541	0.00011093	Significant
snR10	snR10	H/ACA box small nucleolar RNA (snoRNA)	0.460166	0.113218	Not-significant	0.636694	0.0117459	Significant
YOR312C	RPL20B	Ribosomal 60S subunit protein L20B	-0.167514	0.420282	Not-significant	0.635715	9.5739e-09	Significant
YLL004W	ORC3	Subunit of the origin recognition complex (ORC)	0.375392	0.155685	Not-significant	0.635381	0.00970397	Significant
YIL009C-A	EST3	Component of the telomerase holoenzyme	-0.291936	0.177781	Not-significant	0.635254	0.000901804	Significant
YML022W	APT1	Adenine phosphoribosyltransferase	0.00675073	0.985058	Not-significant	0.634679	1.41105e-06	Significant
YNL294C	RIM21	pH sensor molecule, component of the RIM101 pathway	-0.190962	0.202296	Not-significant	0.634501	6.38205e-09	Significant
YML035C	AMD1	AMP deaminase	0.38128	0.000181022	Significant	0.634438	5.84689e-13	Significant
YKL125W	RRN3	Protein required for transcription of rDNA by RNA polymerase I	0.13977	0.55423	Not-significant	0.63433	1.53297e-07	Significant
YAL007C	ERP2	Member of the p24 family involved in ER to Golgi transport	-0.781213	5.1854e-12	Significant	0.632836	3.51385e-06	Significant
YOR052C	YOR052C	AN1-type zinc finger protein of unknown function	0.618122	0.000176462	Significant	0.631855	8.97419e-06	Significant
YDR464W	SPP41	Protein of unknown function	0.147855	0.269519	Not-significant	0.631625	5.82433e-10	Significant
YDR206W	EBS1	Protein involved in translation inhibition and nonsense-mediated decay	-0.0808199	0.722298	Not-significant	0.630526	1.59035e-06	Significant
YOR238W	YOR238W	Putative protein of unknown function	0.163577	0.277838	Not-significant	0.62942	4.57706e-06	Significant
YJL189W	RPL39	Ribosomal 60S subunit protein L39	-0.275838	0.202281	Not-significant	0.628637	1.02732e-09	Significant
YDR478W	SNM1	Ribonuclease MRP complex subunit	0.120754	0.632329	Not-significant	0.628318	0.00304109	Significant
YLR360W	VPS38	Part of a Vps34p phosphatidylinositol 3-kinase complex	0.248391	0.184128	Not-significant	0.627914	1.77198e-05	Significant
YDR295C	HDA2	Subunit of the HDA1 histone deacetylase complex	-0.234699	0.093599	Not-significant	0.627485	1.4817e-06	Significant
YPL019C	VTC3	Subunit of vacuolar transporter chaperone (VTC) complex	-0.709903	2.88429e-06	Significant	0.626142	1.54694e-05	Significant
YBR084C-A	RPL19A	Ribosomal 60S subunit protein L19A	-0.140101	0.563503	Not-significant	0.625807	1.19081e-06	Significant
YBR137W	YBR137W	Protein with a role in ER delivery of tail-anchored membrane proteins	-0.484058	0.00230744	Significant	0.625089	2.07432e-05	Significant
YBL092W	RPL32	Ribosomal 60S subunit protein L32	-0.215361	0.383456	Not-significant	0.624895	3.6762e-07	Significant
YIL126W	STH1	ATPase component of the RSC chromatin remodeling complex	-0.170173	0.212311	Not-significant	0.624801	1.61068e-11	Significant
YGL026C	TRP5	Tryptophan synthase	0.191799	0.278518	Not-significant	0.624202	2.5926e-05	Significant
YKL206C	ADD66	Protein involved in 20S proteasome assembly	-0.373893	0.0134192	Significant	0.624158	0.000121846	Significant
YBR069C	TAT1	Amino acid transporter for valine, leucine, isoleucine, and tyrosine	0.128983	0.451911	Not-significant	0.623816	1.69842e-07	Significant
YFL022C	FRS2	Alpha subunit of cytoplasmic phenylalanyl-tRNA synthetase	-0.134697	0.49593	Not-significant	0.623217	8.84655e-08	Significant
YLL061W	MMP1	High-affinity S-methylmethionine permease	-0.370052	0.0158389	Significant	0.623147	1.60464e-06	Significant
YJL025W	RRN7	Component of the core factor (CF) rDNA transcription factor complex	0.202166	0.114709	Not-significant	0.622071	3.17498e-07	Significant
YPL199C	YPL199C	Putative protein of unknown function	-0.0440279	0.882148	Not-significant	0.621955	7.28234e-05	Significant
YPL097W	MSY1	Mitochondrial tyrosyl-tRNA synthetase	0.0176689	0.940155	Not-significant	0.621596	8.35111e-08	Significant
YNL245C	CWC25	Splicing factor required for the first step of pre-mRNA splicing	0.114231	0.711325	Not-significant	0.618863	0.00304321	Significant
YML089C	YML089C	Dubious open reading frame	-2.11405	3.56071e-11	Down-regulated	0.618856	0.0417361	Significant
YAL037W	YAL037W	Putative protein of unknown function	-0.307154	0.331918	Not-significant	0.618833	0.00655601	Significant
YMR124W	YMR124W	Protein involved in septin-ER tethering	0.392048	6.20545e-05	Significant	0.616904	9.35118e-11	Significant
YOL097C	WRS1	Cytoplasmic tryptophanyl-tRNA synthetase	-0.120451	0.576933	Not-significant	0.616808	3.35477e-12	Significant
YBL079W	NUP170	Subunit of the inner ring of the nuclear pore complex (NPC)	-0.120214	0.631707	Not-significant	0.615631	0.000186391	Significant
YNL178W	RPS3	Protein component of the small (40S) ribosomal subunit	-0.174659	0.484033	Not-significant	0.615195	1.06796e-06	Significant
[truncated: 5,092 more rows]

## Sheet: 8h
gene_id	gene_name	brief_description	log2FC(pam16-3-8h/WT-8h)	FDR	Type	log2FC(WT8h/WT0h)	FDR_HSR	Type_HSR
[truncated: 6,259 more rows]
